# Supplementary material for: Identification of Regulatory Networks of MicroRNAs and Their Targets in Response to Colletotrichum gloeosporioides in Tea Plant (Camellia sinensis L.)
Source: Front Plant Sci. 2019 Sep 12;10:1096. doi: 10.3389/fpls.2019.01096 (PMC6751461; doi:10.3389/fpls.2019.01096)
Supplement: Supplementary file 2 [file Table_2.xls]

## Sheet: conserved miRNAs
Table S2: Summary of conserved miRNA in this study.
Pre-miRNA Index	miRNA Index	miRNA name	miRNA sequence	length	genomeID	strand	start	end	pre-miRNA sequence	#mir/MIR	mirIDs,	rep_mirID	rep_mirSeq	rep_miRID	rep_miRSeq	type	Sequence in miRbase	group	Secondary Structure	hairpin Length	CG%	dG	MFEI	CK (raw reads)			CgIL4d (raw reads)			CK (norm reads)			CgIL4d (norm reads)			Expression level
																								CK1	CK2	CK3	CgIL4d1	CgIL4d2	CgIL4d3	CK1	CK2	CK3	CgIL4d1	CgIL4d2	CgIL4d3
1	1	csn-miR156a_R+1	TGACAGAAGAGAGTGAGCACA	21	Sc0001637	-	321585	321669	aaacTGACAGAAGAGAGTGAGCACAcagaggctaattggtataagtCTATGCCATTGCTTTTGCGtgctcacttctcttctgtca	5	ptc-MIR156c,ppe-MIR156e,mes-MIR156e,mes-MIR156f,cme-MIR156j,	ptc-MIR156c	cattagaaacTGACAGAAGAGAGTGAGCACacagaggcatatttgtataaatctataccattgcttttgcgtgctcacttctcattctgtcagcttccag	ptc-miR156a	TGACAGAAGAGAGTGAGCAC	5'	Diff	gp1	....((((((((((((((((((((.(((((((....(((((((....)))))))..))))))).)))))))).))))))))))))	81	43.5	-52	1.4	228.5	498	401	360.5	407	677	235.297	428.787	430.313	467.583	404.92	533.662	middle
1	2	csn-miR156c-p3_1ss5AG	CTATGCCATTGCTTTTGCG	19	Sc0001637	-	321585	321669	aaacTGACAGAAGAGAGTGAGCACAcagaggctaattggtataagtCTATGCCATTGCTTTTGCGtgctcacttctcttctgtca	5	ptc-MIR156c,ppe-MIR156e,mes-MIR156e,mes-MIR156f,cme-MIR156j,	ptc-MIR156c	cattagaaacTGACAGAAGAGAGTGAGCACacagaggcatatttgtataaatctataccattgcttttgcgtgctcacttctcattctgtcagcttccag	ptc-MIR156c-p3	ctataccattgcttttgcg	3'	New	gp1	....((((((((((((((((((((.(((((((....(((((((....)))))))..))))))).)))))))).))))))))))))	81	43.5	-52	1.4	0	0	0	0	3	0	0	0	0	0	2.98467	0	low
2	3	csn-miR156t	TTGACAGAAGAGAGAGAGCAC	21	Sc0004763	+	119906	119999	aatgTTGACAGAAGAGAGAGAGCACaacccgccatcagctaaagaaaatctttacgtgttgtgggagtgtgctctttcttcttctgtcatcatc	6	mdm-MIR156u,mdm-MIR156v,mdm-MIR156t,mdm-MIR156w,mes-MIR156k,rco-MIR156e,	mdm-MIR156w	tgTTGACAGAAGAGAGAGAGCACaacccrccatcggctaaagagagtcttttccgttgttgggagtgtgctctcttttcttctgtcatca	mdm-miR156t	TTGACAGAAGAGAGAGAGCAC	5'	Yes	gp1	.(((.(((((((((((((((((((((.(((((...((..(((((.....)))))..))..)))))..)))))))))))).))))))))).))).	92	43.6	-48	1.2	0	0	0	0	0	3	0	0	0	0	0	2.36482	low
3	4	csn-miR156f	TTGACAGAAGATAGAGAGCAC	21	Sc0002086	+	353609	353726	aggaggcattggtgatgctgTTGACAGAAGATAGAGAGCACagatgatggtgtgcatgaagtatgcatctcactctttgtGCTCTCTAGTCTTCTGTCATCaccttcagcccctcact	11	vvi-MIR156g,mtr-MIR156h,gma-MIR156j,ptc-MIR156g,ptc-MIR156j,ptc-MIR156h,ptc-MIR156i,gra-MIR157b,ppe-MIR156g,tcc-MIR156e,hbr-MIR156,	vvi-MIR156g	ggtgatgttgTTGACAGAAGATAGAGAGCACagatgatgatgtgcatggagtttgcatctcactcctttgtgctctctagacttctgtcatcacctcagcccc	vvi-miR156f	TTGACAGAAGATAGAGAGCAC	5'	Yes	gp1	(((.(((...(((((......(((((((((((((((((((((((.((((..(((((((...)))))))..)).))))))))))))))).)))))))))))))))....))))))....	114	47.5	-58.8	1	58.3333	114	59.6667	56.3333	52	92.6667	60.0686	98.1561	64.0283	73.0665	51.7342	73.0467	middle
3	5	csn-miR156h-3p_2ss6TC9TG	GCTCTCTAGTCTTCTGTCATC	21	Sc0002086	+	353609	353726	aggaggcattggtgatgctgTTGACAGAAGATAGAGAGCACagatgatggtgtgcatgaagtatgcatctcactctttgtGCTCTCTAGTCTTCTGTCATCaccttcagcccctcact	11	vvi-MIR156g,mtr-MIR156h,gma-MIR156j,ptc-MIR156g,ptc-MIR156j,ptc-MIR156h,ptc-MIR156i,gra-MIR157b,ppe-MIR156g,tcc-MIR156e,hbr-MIR156,	mtr-MIR156h	tgctgTTGACAGAAGATAGAGAGCACagatgatgaaatgcatggaaggcaatggcatctcattcctttgtGCTCTTTATTCTTCTGTCATCacc	mtr-miR156h-3p	GCTCTTTATTCTTCTGTCATC	3'	Diff	gp1	(((.(((...(((((......(((((((((((((((((((((((.((((..(((((((...)))))))..)).))))))))))))))).)))))))))))))))....))))))....	114	47.5	-58.8	1	0	6	0	0	0	0	0	5.16611	0	0	0	0	low
4	6	csn-miR156f-3p	TTGACAGAAGATAGAGAGCAC	21	Sc0000009	+	1988054	1988150	atgttgTTGACAGAAGATAGAGAGCACagatgataaaatgcacagagagtttgcatctcactcctttgtGCTCTCTATACTTCTGTCATCatccttt	8	vvi-MIR156i,stu-MIR156a,mes-MIR156h,mes-MIR156j,cme-MIR156e,rco-MIR156g,aqc-MIR156b,aqc-MIR156a,	vvi-MIR156i	ggtgacgttgTTGACAGAAGATAGAGAGCACagatgatgaaatgcaaggagccagcatctcactcctttgtgctctctattcttctgtcatcaccttaaggcc	vvi-miR156f	TTGACAGAAGATAGAGAGCAC	5'	Yes	gp1	....((.(((((((((((((((((((((((.((....(((((.........))))).....)).)))))))))))))).))))))))).))......	87	39.2	-41	1.1	58.3333	114	59.6667	56.3333	52	92.6667	60.0686	98.1561	64.0283	73.0665	51.7342	73.0467	middle
4	7	csn-miR156a-p3_1ss10TA	GCTCTTTATACTTCTGTCATC	21	Sc0000009	+	1988054	1988150	atgttgTTGACAGAAGATAGAGAGCACagatgataaaatgcacagagagtttgcatctcactcctttgtGCTCTCTATACTTCTGTCATCatccttt	8	vvi-MIR156i,stu-MIR156a,mes-MIR156h,mes-MIR156j,cme-MIR156e,rco-MIR156g,aqc-MIR156b,aqc-MIR156a,	stu-MIR156a	TTGACAGAAGATAGAGAGCACagatgataaagtgcatggaaattgtctgcaccttactcctttgtgctctttattcttctgtcatca	stu-MIR156a-p3	gctctttattcttctgtcatc	3'	New	gp1	....((.(((((((((((((((((((((((.((....(((((.........))))).....)).)))))))))))))).))))))))).))......	87	39.2	-41	1.1	0	3	0	0	3	3	0	2.58306	0	0	2.98467	2.36482	low
5	8	csn-miR156b-5p_R+1	TGACAGAAGAGAGTGAGCACA	21	Sc0000811	+	10815	10914	gtaagagaggTGACAGAAGAGAGTGAGCACAcatggtcttttcttgcatgacttctccatgctcgaagctatgcgtgctcactctctatctgtcatccac	17	mtr-MIR156b,gma-MIR156w,ptc-MIR156b,stu-MIR156g,stu-MIR156k,stu-MIR156h,stu-MIR156i,stu-MIR156e,mdm-MIR156o,mdm-MIR156b,mdm-MIR156i,mdm-MIR156g,mes-MIR156g,mes-MIR156c,cpa-MIR156c,ghr-MIR156a,rco-MIR156c,	mtr-MIR156b	ggaggTGACAGAAGAGAGTGAGCACacatggtactttcgtgtatgatgtttcattctcgaagctatgtgTGCTCACTCTCTATCTGTCACCccat	mtr-miR156b-5p	TGACAGAAGAGAGTGAGCAC	5'	Diff	gp1	........((((((((((((((((((((((.((((((...(((..(((((.......)))))..))))))))).))))))))))))).)))))))))...	89	48	-54	1.1	228.5	498	401	360.5	407	677	235.297	428.787	430.313	467.583	404.92	533.662	middle
6	9	csn-miR156f-5p	TTGACAGAAGATAGAGAGCAC	21	Sc0002086	+	353885	353978	tgttgTTGACAGAAGATAGAGAGCACagatgatgaagtgcatgcctgattgcatctcactcctttgtgctccctatccttctgtcatcaccttc	3	rco-MIR156h,bcy-MIR156,bgy-MIR156,	rco-MIR156h	tgttgTTGACAGAAGATAGAGAGCACagatgatgatgtgcaatgactttttctgcatctcactcctttgtgctctctatgcttctgtcatcaccttc	rco-miR156f	TTGACAGAAGATAGAGAGCAC	5'	Yes	gp1	...((.(((((((((((((.(((((((((.(((((..((((........))))..))).)).))))))))).)))).))))))))).)).....	86	45.7	-42.6	1	58.3333	114	59.6667	56.3333	52	92.6667	60.0686	98.1561	64.0283	73.0665	51.7342	73.0467	middle
7	10	csn-miR160c	TGCCTGGCTCCCTGTATGCCA	21	Sc0002726	+	226701	226795	atatatatataTGCCTGGCTCCCTGTATGCCAtttgtagagcccaccggagcatcgatggcctccgtggatgGCGTATGAGGAGCCATGCATAtt	11	vvi-MIR160e,ptc-MIR160b,ptc-MIR160c,ath-MIR160a,stu-MIR160a,mdm-MIR160e,mdm-MIR160c,mes-MIR160d,mes-MIR160h,cpa-MIR160c,cpa-MIR160f,	vvi-MIR160e	taagcatataTGCCTGGCTCCCTGTATGCCAtttgcagagcccaccggcacatcgatggccttcgtggatggcgtatgaggagccatgcatatgccccatct	vvi-miR160c	TGCCTGGCTCCCTGTATGCCA	5'	Yes	gp1	........((((((.(((((((..(((((((((..(..(((.(((.((......)).))).)))..)..)))))))))..))))))).)))))).	86	50.5	-48.2	1	737	1399	733	537.5	648.5	834	758.924	1204.56	786.582	697.159	645.185	657.421	middle
7	11	csn-miR160b-3p_1ss16TA	GCGTATGAGGAGCCAAGCATA	21	Sc0002726	+	226701	226795	atatatatataTGCCTGGCTCCCTGTATGCCAtttgtagagcccaccggagcatcgatggcctccgtggatgGCGTATGAGGAGCCATGCATAtt	11	vvi-MIR160e,ptc-MIR160b,ptc-MIR160c,ath-MIR160a,stu-MIR160a,mdm-MIR160e,mdm-MIR160c,mes-MIR160d,mes-MIR160h,cpa-MIR160c,cpa-MIR160f,	ptc-MIR160c	atattatatgTGCCTGGCTCCCTGTATGCCAtttgcagagcccaccggttcttcgatggcctccgtggatgGCGTATGAGGAGCCATGCATAttcaca	ptc-miR160b-3p	GCGTATGAGGAGCCATGCATA	3'	Diff	gp1	........((((((.(((((((..(((((((((..(..(((.(((.((......)).))).)))..)..)))))))))..))))))).)))))).	86	50.5	-48.2	1	5.5	10	7	2.5	0	1.5	5.66361	8.61018	7.5117	3.2426	0	1.18241	low
8	12	csn-miR160a	TGCCTGGCTCCCTGTATGCCA	21	Sc0000246	+	485608	485696	tgtataTGCCTGGCTCCCTGTATGCCAtttgcagagtctattgatacattgatggcctccgtgaatgGCGTATGAGGAGCCAAGCATAt	3	mtr-MIR160b,mtr-MIR160e,gma-MIR160b,	mtr-MIR160b	gtatgTGCCTGGCTCCCTGTATGCCAtatatgaagctcattgaaaaatcaatgacctttgtggatggcgtatgaggagccaagcatattcc	mtr-miR160a	TGCCTGGCTCCCTGTATGCCA	5'	Yes	gp1	...((((((.(((((((..((((((((((..(.(((.((((..(....)..)))).))).)..))))))))))..))))))).))))))	86	47.2	-49.5	1.2	737	1399	733	537.5	648.5	834	758.924	1204.56	786.582	697.159	645.185	657.421	middle
8	13	csn-miR160a-3p	GCGTATGAGGAGCCAAGCATA	21	Sc0000246	+	485608	485696	tgtataTGCCTGGCTCCCTGTATGCCAtttgcagagtctattgatacattgatggcctccgtgaatgGCGTATGAGGAGCCAAGCATAt	3	mtr-MIR160b,mtr-MIR160e,gma-MIR160b,	gma-MIR160b	atgtgtatgTGCCTGGCTCCCTGTATGCCAtttgcatagttcattgagcatcaatgatctttgtgaatgGCGTATGAGGAGCCAAGCATA	gma-miR160a-3p	GCGTATGAGGAGCCAAGCATA	3'	Yes	gp1	...((((((.(((((((..((((((((((..(.(((.((((..(....)..)))).))).)..))))))))))..))))))).))))))	86	47.2	-49.5	1.2	5.5	10	7	2.5	0	1.5	5.66361	8.61018	7.5117	3.2426	0	1.18241	low
9	14	csn-miR162a-3p	TCGATAAACCTCTGCATCCAG	21	Sc0005463	+	2813	2899	gcagcggttcatcgatctgttccctgaactggttgtgtattcataaatatacagaacaggaatcggTCGATAAACCTCTGCATCCAG	1	stu-MIR162b,	stu-MIR162b	GGAGGCAGCGGTTCATCGATCtgttccctgaaagctgaatatatatgcaaaaatacagcaaaaggaaccgaTCGATAAACCTCTGCATCCAG	stu-miR162a-3p	TCGATAAACCTCTGCATCCAG	3'	Yes	gp1	((((.((((.(((((((..((.((((......(((((((((....)))))))))..))))))..))))))).)))).))))......	81	44.8	-32.8	0.8	3929	4504	2977	1694	1836	2035	4045.88	3878.03	3194.62	2197.18	1826.62	1604.14	high
10	15	csn-miR166a-p5_1ss19AC	GGAATGCTGTCTGGTTCGCGA	21	Sc0004474	-	66563	66655	agttgaggGGAGTGCTGTCTGGTTCGAGActatccatttgaagtgcaaaccatcatctgaatgatcTCGGACCAGGCTTCATTCCCCccaact	2	vvi-MIR166h,ppe-MIR166a,	ppe-MIR166a	gttgaggggaatgctgtctggttcgagaccattcctttgaagcaagaaacatgatcatccgaatgatcTCGGACCAGGCTTCATTCCCCccaac	ppe-MIR166a-p5	ggaatgctgtctggttcgaga	5'	New	gp1	(((((.((((((((..(((((((((((((..((.((..(((.((....))..)))..)).))..)))))))))))))..)))))))).)))))	93	49.5	-47.7	1	0	7	3	0	4	3	0	6.02713	3.2193	0	3.97955	2.36482	low
10	16	csn-miR166a_R+2_1	TCGGACCAGGCTTCATTCCCC	21	Sc0004474	-	66563	66655	agttgaggGGAGTGCTGTCTGGTTCGAGActatccatttgaagtgcaaaccatcatctgaatgatcTCGGACCAGGCTTCATTCCCCccaact	2	vvi-MIR166h,ppe-MIR166a,	vvi-MIR166h	aacagttgaggggaacgctgtctggttcgagaccactcgcttcaagtacagacataatctgaatgatcTCGGACCAGGCTTCATTCCccccaactcaaca	vvi-miR166a	TCGGACCAGGCTTCATTCC	3'	Diff	gp1	(((((.((((((((..(((((((((((((..((.((..(((.((....))..)))..)).))..)))))))))))))..)))))))).)))))	93	49.5	-47.7	1	265406	345764	314950	91676	122932	230058	273301	297710	337973	118907	122304	181348	high
11	17	csn-miR166i-5p_R+1_1ss20GA	GGAATGTCGTCTGGTTCGAAA	21	Sc0003918	+	181399	181494	gttgaggGGAATGTCGTCTGGTTCGAAAtcattcatgaaatgatactcaaagtacataccatttgaatgattTCGGACCAGGCTTCATTCCCCtca	1	gma-MIR166i,	gma-MIR166i	gttgaggGGAATGTCGTCTGGTTCGAGaccattcatgcaagtagtctcagacatgactcttctgagtgattTCGGACCAGGCTTCATTCCCCtcagc	gma-miR166i-5p	GGAATGTCGTCTGGTTCGAG	5'	Diff	gp1	..(((((((((((..((((((((((((((((((((((..(((.(((.....))))))..))..))))))))))))))))))))..)))))))))))	94	41.7	-55.2	1.4	10	8	4	7	14	16	10.2975	6.88815	4.2924	9.07927	13.9284	12.6124	middle
11	18	csn-miR166a-3p	TCGGACCAGGCTTCATTCCCC	21	Sc0003918	+	181399	181494	gttgaggGGAATGTCGTCTGGTTCGAAAtcattcatgaaatgatactcaaagtacataccatttgaatgattTCGGACCAGGCTTCATTCCCCtca	1	gma-MIR166i,	gma-MIR166i	gttgaggGGAATGTCGTCTGGTTCGAGaccattcatgcaagtagtctcagacatgactcttctgagtgattTCGGACCAGGCTTCATTCCCCtcagc	gma-miR166a-3p	TCGGACCAGGCTTCATTCCCC	3'	Yes	gp1	..(((((((((((..((((((((((((((((((((((..(((.(((.....))))))..))..))))))))))))))))))))..)))))))))))	94	41.7	-55.2	1.4	265406	345764	314950	91676	122932	230058	273301	297710	337973	118907	122304	181348	high
12	19	csn-miR167c_R-1	TGAAGCTGCCAGCATGATCTG	21	Sc0004900	-	89998	90069	atagtTGAAGCTGCCAGCATGATCTGagctttccttatcataggaaaaaatagatcatatggcagcttcacc	1	rco-MIR167c,	rco-MIR167c	atagtTGAAGCTGCCAGCATGATCTGGagcttttctatccaggagagactagatcatgtggcagtttcacctgttg	rco-miR167c	TGAAGCTGCCAGCATGATCTGG	5'	Diff	gp1	.....(((((((((((..((((((((...((((((......))))))...)))))))).)))))))))))..	65	40.3	-35.8	1.2	2227	2932.25	2628	5024.25	7266	8412	2293.25	2524.72	2820.11	6516.65	7228.86	6630.96	high
13	20	csn-miR167b	TGAAGCTGCCAGCATGATCTA	21	Sc0002578	-	79021	79125	cgtgcaccactttcagtTGAAGCTGCCAGCATGATCTAaacatacctcctttgttgaggacagattAGATCGTGTGGTAGCTTCACCtgttgttggtgtcacgaa	5	vvi-MIR167e,ptc-MIR167g,ptc-MIR167f,mdm-MIR167c,tcc-MIR167a,	vvi-MIR167e	cactatcagtTGAAGCTGCCAGCATGATCTAaacttgcttccctttgtgaacagagatcagatcatgtggcagtttcacctgttgttggt	vvi-miR167b	TGAAGCTGCCAGCATGATCTA	5'	Yes	gp1	(((((((((....(((.(((((((((((.((((((((((.....((((.......)))).....))))))))))))))))))))).)))....))))).))))..	103	46.7	-52.8	1.1	599.667	984.583	726.667	447.917	892.667	863.667	617.505	847.744	779.786	580.965	888.104	680.806	middle
13	21	csn-miR167f-3p_2ss12CT15TC	AGATCATGTGGTAGCTTCACC	21	Sc0002578	-	79021	79125	cgtgcaccactttcagtTGAAGCTGCCAGCATGATCTAaacatacctcctttgttgaggacagattAGATCGTGTGGTAGCTTCACCtgttgttggtgtcacgaa	5	vvi-MIR167e,ptc-MIR167g,ptc-MIR167f,mdm-MIR167c,tcc-MIR167a,	ptc-MIR167f	ctctatcagtTGAAGCTGCCAGCATGATCTTagccttcctcctttgttgaggaaagaaacAGATCATGTGGCAGTTTCACCtgttgt	ptc-miR167f-3p	AGATCATGTGGCAGTTTCACC	3'	Diff	gp1	(((((((((....(((.(((((((((((.((((((((((.....((((.......)))).....))))))))))))))))))))).)))....))))).))))..	103	46.7	-52.8	1.1	14.5	27	17	14.5	41	23	14.9313	23.2475	18.2427	18.8071	40.7904	18.1303	middle
14	22	csn-miR167a	TGAAGCTGCCAGCATGATCTA	21	Sc0002719	+	8677	8769	tagcagtTGAAGCTGCCAGCATGATCTAaacttcccatttctctctctctcaaaggaaggatcAGATCATGTGGTAGCTTCACCtgttgatgg	3	ptc-MIR167a,mes-MIR167b,cme-MIR167b,	ptc-MIR167a	cactagcagtTGAAGCTGCCAGCATGATCTAacttccttgcttctttatcaaggatggatttagatcatgtggtggtttcacctgttga	ptc-miR167a	TGAAGCTGCCAGCATGATCTA	5'	Yes	gp1	((((((.(((((((((((.((((((((...(((((...................)))))....))))))))))))))))))).))))))....	89	45.2	-41.3	1	599.667	984.583	726.667	447.917	892.667	863.667	617.505	847.744	779.786	580.965	888.104	680.806	middle
14	23	csn-miR167b-p3	AGATCATGTGGTAGCTTCACC	21	Sc0002719	+	8677	8769	tagcagtTGAAGCTGCCAGCATGATCTAaacttcccatttctctctctctcaaaggaaggatcAGATCATGTGGTAGCTTCACCtgttgatgg	3	ptc-MIR167a,mes-MIR167b,cme-MIR167b,	mes-MIR167b	ccactagcagtTGAAGCTGCCAGCATGATCTAaacttccttttctttataatctgcatcaaaaggaaagatcagatcatgtggtagcttcacctgttgatgg	mes-MIR167b-p3	agatcatgtggtagcttcacc	3'	New	gp1	((((((.(((((((((((.((((((((...(((((...................)))))....))))))))))))))))))).))))))....	89	45.2	-41.3	1	14.5	27	17	14.5	41	23	14.9313	23.2475	18.2427	18.8071	40.7904	18.1303	middle
15	24	csn-miR167a-3p	TGAAGCTGCCAGCATGATCTA	21	Sc0000267	-	153124	153201	tcagtTGAAGCTGCCAGCATGATCTAaatcccttctttgctgaggatagattagatcatgtggtagcttcacccgttg	1	rco-MIR167b,	rco-MIR167b	tcagtTGAAGCTGCCAGCATGATCTAaatcttcctccctcgttgaggagagatcagatcatgtggcagtttcacccgttg	rco-miR167a	TGAAGCTGCCAGCATGATCTA	5'	Yes	gp1	.....(((((((((((.((((((((((.((..(((((....)))))..))))))))))))))))))))))).......	66	44.9	-35.5	1	599.667	984.583	726.667	447.917	892.667	863.667	617.505	847.744	779.786	580.965	888.104	680.806	middle
16	25	csn-miR171e-5p	CGATGTTGGTGAGGTTCAATC	21	Sc0000517	-	714078	714174	aaaagaaagCGATGTTGGTGAGGTTCAATCcgaagacggatttacgcttgtggttgtaaatgaggatctcagaTTGAGCCGCGCCAATATCACTttt	5	mtr-MIR171e,ptc-MIR171d,nta-MIR171b,rco-MIR171g,ssl-MIR171b,	mtr-MIR171e	aaagCGATGTTGGTGAGGTTCAATCcgaagacggatttacatgtatagagttgtaaaatacgatctcAGATTGAGCCGCGCCAATATCacttt	mtr-miR171e-5p	CGATGTTGGTGAGGTTCAATC	5'	Yes	gp1	....(((((.((((((((((.(((((((((.((.((...((((((((.....).))))))).....)))).))))))))).)))))))))).)))))	93	43.3	-37.6	0.9	2.5	4	5.5	0	0	0	2.57437	3.44407	5.90205	0	0	0	low
16	26	csn-miR171b	TTGAGCCGCGCCAATATCACT	21	Sc0000517	-	714078	714174	aaaagaaagCGATGTTGGTGAGGTTCAATCcgaagacggatttacgcttgtggttgtaaatgaggatctcagaTTGAGCCGCGCCAATATCACTttt	5	mtr-MIR171e,ptc-MIR171d,nta-MIR171b,rco-MIR171g,ssl-MIR171b,	nta-MIR171b	taaaggaagcgatgttggtgaggttcaatccgaagacgtgtttacgttttgttttcgtaaaaaacgatctcagaTTGAGCCGCGCCAATATCACTtcctatatat	nta-miR171b	TTGAGCCGCGCCAATATCACT	3'	Yes	gp1	....(((((.((((((((((.(((((((((.((.((...((((((((.....).))))))).....)))).))))))))).)))))))))).)))))	93	43.3	-37.6	0.9	61	177.5	59.5	6.5	0	6.5	62.8146	152.831	63.8495	8.43076	0	5.12378	middle
17	27	csn-miR171a-p5	GGATATTGGTCCGGTTCAATA	21	Sc0002271	+	57785	57869	aacgGGATATTGGTGCGGTTCAATAagaaagtagtgctcaaaatattgggctctccttttTGATTGAGCCGTGCCAATATCacgt	2	cpa-MIR171d,rco-MIR171a,	rco-MIR171a	aaacgggatattggtccggttcaataagaaaacagtgctcaaaatgttatgggccctgctttttgaTTGAGCCGTGCCAATATCACGtgcac	rco-MIR171a-p5	ggatattggtccggttcaata	5'	New	gp1	.(((.((((((((..(((((((((.((((((.((.((((((....)))))).)).)))))).)))))))))..)))))))).)))	84	42.4	-46.5	1.3	3	0	4	0	0	0	3.08924	0	4.2924	0	0	0	low
17	28	csn-miR171a	TGATTGAGCCGTGCCAATATC	21	Sc0002271	+	57785	57869	aacgGGATATTGGTGCGGTTCAATAagaaagtagtgctcaaaatattgggctctccttttTGATTGAGCCGTGCCAATATCacgt	2	cpa-MIR171d,rco-MIR171a,	cpa-MIR171d	tattggtccggttcaataagaaaacagtgctctgatcgtgttgagttctgcttttTGATTGAGCCGTGCCAATATC	cpa-miR171a	TGATTGAGCCGTGCCAATATC	3'	Yes	gp1	.(((.((((((((..(((((((((.((((((.((.((((((....)))))).)).)))))).)))))))))..)))))))).)))	84	42.4	-46.5	1.3	20009	29899	18044.5	1913	1837.5	2679.5	20604.2	25743.6	19363.6	2481.24	1828.11	2112.18	high
18	29	csn-miR171k-5p	CGATGTTGGTGAGGTTCAATC	21	Sc0001871	-	77767	77875	gggaagcaaaagaaagCGATGTTGGTGAGGTTCAATCcgaagacggatttacgcatgtgtttgactgtaaaaggcgatctcagaTTGAGCCGCGCCAATATCACTttct	6	gma-MIR171k,gma-MIR171l,ptc-MIR171c,mes-MIR171f,mes-MIR171e,tcc-MIR171c,	gma-MIR171k	gagaaagCGATGTTGGTGAGGTTCAATCcgaagacggatttacatgtagaagcagtaaaatacgatctcagaTTGAGCCGCGCCAATATCACTttatc	gma-miR171k-5p	CGATGTTGGTGAGGTTCAATC	5'	Yes	gp1	..........((((((.((((((((((.(((((((((.((.((((..((((((((......))..))))))...)).)))).))))))))).)))))))))).))))))	99	45.9	-41.8	0.8	2.5	4	5.5	0	0	0	2.57437	3.44407	5.90205	0	0	0	low
18	30	csn-miR171k-3p	TTGAGCCGCGCCAATATCACT	21	Sc0001871	-	77767	77875	gggaagcaaaagaaagCGATGTTGGTGAGGTTCAATCcgaagacggatttacgcatgtgtttgactgtaaaaggcgatctcagaTTGAGCCGCGCCAATATCACTttct	6	gma-MIR171k,gma-MIR171l,ptc-MIR171c,mes-MIR171f,mes-MIR171e,tcc-MIR171c,	gma-MIR171k	gagaaagCGATGTTGGTGAGGTTCAATCcgaagacggatttacatgtagaagcagtaaaatacgatctcagaTTGAGCCGCGCCAATATCACTttatc	gma-miR171k-3p	TTGAGCCGCGCCAATATCACT	3'	Yes	gp1	..........((((((.((((((((((.(((((((((.((.((((..((((((((......))..))))))...)).)))).))))))))).)))))))))).))))))	99	45.9	-41.8	0.8	61	177.5	59.5	6.5	0	6.5	62.8146	152.831	63.8495	8.43076	0	5.12378	middle
19	31	csn-miR171g	TGATTGAGCCGTGCCAATATC	21	Sc0005024	+	69292	69369	tgatgttggaatggctcaatcaaatcaaatctcccaagggcttgggtcttttagttTGATTGAGCCGTGCCAATATCa	5	mdm-MIR171m,mdm-MIR171h,mes-MIR171k,mes-MIR171g,rco-MIR171e,	mdm-MIR171h	gatgttggaatggctcaatcaaataaaatctcccaaaggattgggtcttttaattTGATTGAGCCGTGCCAATATC	mdm-miR171g	TGATTGAGCCGTGCCAATATC	3'	Yes	gp1	.((((((((.((((((((((((((..(((...(((((....)))))...)))..)))))))))))))).)))))))).	76	42.3	-42.6	1.3	20009	29899	18044.5	1913	1837.5	2679.5	20604.2	25743.6	19363.6	2481.24	1828.11	2112.18	high
20	32	csn-miR319a	TTGGACTGAAGGGAGCTCCC	20	Sc0000785	+	406683	406853	aagagagctttcttcagtccactcataggaggttgtacgatttaattagctgccgactcattcatccaaatactgagttgatcgatgtaaatactcagtaaatgagtgaatgatgcgggagacaaattgaatcttaagcttcctgtacTTGGACTGAAGGGAGCTCCCttt	1	gma-MIR319j,	gma-MIR319j	aggtaagagagctctcttcagcccactcataggtgataataggatttaattagctgccgactcattcatacacatgctgagtgaattaatgaataatactcagtaaatgagtgaatgatacgggagacaaattgaatcttatgttttctgtacTTGGACTGAAGGGAGCTCCCttttct	gma-miR319a	TTGGACTGAAGGGAGCTCCC	3'	Yes	gp1	(((.(((((..((((((((((...((((((((((....(((((((((..((.(((..(((((((..((..((((((((..............))))))))..))..)))))))..))).))...)))))))))...))))))))))...))))))))))..))))).))).	170	40.9	-80	1.1	63	437.167	153.417	95.25	46.5	38.5	64.8741	376.409	164.631	123.543	46.2623	30.3486	middle
21	33	csn-miR319a_R-1	TTGGACTGAAGGGAGCTCCC	20	Sc0006137	-	29896	30074	gaaggagctctcttcggtccagttcgaggcggtttgaaggctgataactcagctgctgactcgttggttcaagaactcatcaaatcataatagagaaaagagtgatatgtttttgatccatcgatgcaggagctgtgttcagttattgctgtcacgccTTGGACTGAAGGGAGCTCCCt	2	mdm-MIR319c,rco-MIR319b,	rco-MIR319b	aagaaggagctctcttcagtccagtccaaggcggttgagggctgggacttagctgctgactcgttggttcaagagctcatcatcatcaatgtgtaagagatgtctttttgatccaacgaagctggagctgtgttcagttatggctgtcatgtcTTGGACTGAAGGGAGCTCCCTccaat	rco-miR319a	TTGGACTGAAGGGAGCTCCCT	3'	Diff	gp1	...(((((((((((((((((((..((.((((((..((..(((((..((.(((((.(((..(((.(((.((((((((..((((..((.............)).))))..)))))))).))).)))..))).))))).)))))))..)))))))).))..)))))))))))))))))))..	174	46.9	-84.9	1	63	437.167	153.417	95.25	46.5	38.5	64.8741	376.409	164.631	123.543	46.2623	30.3486	middle
22	34	csn-miR319f-p5_1ss1AT	TGAGCTTCCTTCAGTCCACTC	21	Sc0001051	+	90451	90641	tggtataagTGAGCTTCCTTCAGTCCACTCatgggtgggtgaatgatttgaaattaactgccgactcattcattcaaacgcagtaggtcggagtagtttatgctactgtgaatgtacgaatgatgcgggagatgaatttcttccttctcttctctatgcTTGGACTGAAGGGATCTCCCttttattgtttt	1	vvi-MIR319f,	vvi-MIR319f	agtggtttaagagagcttccttcagtccactcatggatgggttaggggtttggattagctgccgactcattcattcaaacacagtagaatggaaatggagtttactactgtgaatgtgtgaatgatgcgggaggtaaatttcatccttttcttgtctgtgcTTGGACTGAAGGGAGCTCCCTtctactgtttt	vvi-MIR319f-p5	agagcttccttcagtccactc	5'	New	gp1	..(((.(((.(((.(((((((((((((..((((((..((.(((.((...((((((..((.(((..((((((...((..((((((((................))))))))..))...))))))..))).))...)))))).)).))).))..))))))..))))))))))))).))).))).)))......	183	41.9	-69.9	0.9	2	11	11.5	4	3.5	0	2.05949	9.4712	12.3407	5.18816	3.48211	0	middle
22	35	csn-miR319b_R-1	TTGGACTGAAGGGAGCTCCC	20	Sc0001051	+	90451	90641	tggtataagTGAGCTTCCTTCAGTCCACTCatgggtgggtgaatgatttgaaattaactgccgactcattcattcaaacgcagtaggtcggagtagtttatgctactgtgaatgtacgaatgatgcgggagatgaatttcttccttctcttctctatgcTTGGACTGAAGGGATCTCCCttttattgtttt	1	vvi-MIR319f,	vvi-MIR319f	agtggtttaagagagcttccttcagtccactcatggatgggttaggggtttggattagctgccgactcattcattcaaacacagtagaatggaaatggagtttactactgtgaatgtgtgaatgatgcgggaggtaaatttcatccttttcttgtctgtgcTTGGACTGAAGGGAGCTCCCTtctactgtttt	vvi-miR319b	TTGGACTGAAGGGAGCTCCCT	3'	Diff	gp1	..(((.(((.(((.(((((((((((((..((((((..((.(((.((...((((((..((.(((..((((((...((..((((((((................))))))))..))...))))))..))).))...)))))).)).))).))..))))))..))))))))))))).))).))).)))......	183	41.9	-69.9	0.9	63	437.167	153.417	95.25	46.5	38.5	64.8741	376.409	164.631	123.543	46.2623	30.3486	middle
23	36	csn-miR319m-p5_1ss1AT	TGAGCTTCCTTCAGTCCACTC	21	Sc0000077	+	1254551	1254730	ttaagTGAGCTTCCTTCAGTCCACTCatgggtgggtgaaggatttgaaattagctgccgactcattcattcaaacacagtagaacacggagtagttcttatactattgtgaatgtgtgaatgatgcgggagatgaatttcatcctttcttctctgtgcTTGGACTGAAGGGAGCTCCCtt	1	gma-MIR319m,	gma-MIR319m	atagtttaagagagcttccttcagtccactcatggatggatagagggtttgaattagctgctgactcattcattcaaacacaatagaacgggtgtcatggtatgctattgtgaatgcctgaatgatgcaggaggtaaagttcatccttttcttgtctgtgcTTGGACTGAAGGGAGCTCCCttttactgt	gma-MIR319m-p5	agagcttccttcagtccactc	5'	New	gp1	..(((.(((((((((((((((((..((..((..((.((((((..(((((((..((.(((..(((((((..((..((((((((......(((.....)))...))))))))..))..)))))))..))).))...)))))))))))))))..))..))..))))))))))))))))).)))	178	43.3	-81.3	1	2	11	11.5	4	3.5	0	2.05949	9.4712	12.3407	5.18816	3.48211	0	middle
23	37	csn-miR319a-3p	TTGGACTGAAGGGAGCTCCC	20	Sc0000077	+	1254551	1254730	ttaagTGAGCTTCCTTCAGTCCACTCatgggtgggtgaaggatttgaaattagctgccgactcattcattcaaacacagtagaacacggagtagttcttatactattgtgaatgtgtgaatgatgcgggagatgaatttcatcctttcttctctgtgcTTGGACTGAAGGGAGCTCCCtt	1	gma-MIR319m,	gma-MIR319m	atagtttaagagagcttccttcagtccactcatggatggatagagggtttgaattagctgctgactcattcattcaaacacaatagaacgggtgtcatggtatgctattgtgaatgcctgaatgatgcaggaggtaaagttcatccttttcttgtctgtgcTTGGACTGAAGGGAGCTCCCttttactgt	gma-miR319a	TTGGACTGAAGGGAGCTCCC	3'	Yes	gp1	..(((.(((((((((((((((((..((..((..((.((((((..(((((((..((.(((..(((((((..((..((((((((......(((.....)))...))))))))..))..)))))))..))).))...)))))))))))))))..))..))..))))))))))))))))).)))	178	43.3	-81.3	1	63	437.167	153.417	95.25	46.5	38.5	64.8741	376.409	164.631	123.543	46.2623	30.3486	middle
24	38	csn-miR2916-p5_1ss5AG	TACCGTCCTAGTCTCAACCA	20	Sc0001198	-	418560	418650	tgggggctcgaagacgatcagaTACCGTCCTAGTCTCAACCATAAACGATGCCGACCAGGgatcggcggatgttgcttataggactccgcc	1	peu-MIR2916,	peu-MIR2916	TGGGGACTCGAAGACGATCATATaccatcctagtctcaaccataaacgatgccgaccagggattggcggatgttgcttctaggagtccgcca	peu-MIR2916-p5	Taccatcctagtctcaacca	5'	New	gp1	..((((((....((((.........))))..)))))).........((((.((.....)).))))(((((.(((........)))))))).	35	56	-25.9	0.5	1112	1082	1242	587	1047	611	1145.08	931.622	1332.79	761.362	1041.65	481.635	middle
24	39	csn-miR2916-p3	TAAACGATGCCGACCAGG	18	Sc0001198	-	418560	418650	tgggggctcgaagacgatcagaTACCGTCCTAGTCTCAACCATAAACGATGCCGACCAGGgatcggcggatgttgcttataggactccgcc	1	peu-MIR2916,	peu-MIR2916	TGGGGACTCGAAGACGATCATATaccatcctagtctcaaccataaacgatgccgaccagggattggcggatgttgcttctaggagtccgcca	peu-MIR2916-p3	taaacgatgccgaccagg	3'	New	gp1	..((((((....((((.........))))..)))))).........((((.((.....)).))))(((((.(((........)))))))).	35	56	-25.9	0.5	842	769	670	342	564	399	867.047	662.123	718.977	443.587	561.117	314.521	middle
25	40	csn-miR8005c-p5_1ss11AG	AGGGTTTAGGGTTTAGGGTTTAGG	24	Sc0001135	-	487369	487571	ggtttagggtttagagttttaggatttaggttttaggatttagtgtttagtgtttAGTGTTTAGGGTTTAGGGTTTAGGatttagggtttaggatttaggatttaggatttagtgtttagggtttaggatttaggatttaaggtttagggttttagggtttaggatttagtggttaggattTAGGGTTTAGGGTTTAGGGTTt	1	stu-MIR8005c,	stu-MIR8005c	ggtttagtgtttagaatttaggattaagggtttagggtttagggttagggttcaatgtttggagtttaggatataggatttagggtttaggatttagggtttagggattagagtttaggatttagagtttagggtttagagtttgcgtttaggttttagggtttaggcttttgtTTTAGAGTTTAAGGTTTAGAGTTT	stu-MIR8005c-p5	agggtttaggatttagggtttagg	5'	New	gp1	..........((((((..((((..((((..(..(((...((((.....((..((....(((..(..((..(..((...(((.....)))...))..)..))..)..)))..))..))......))))...)))..)..))))..))))..))))))...............................................	146	34	-9.8	0.1	4	0	0	0	0	0	4.11899	0	0	0	0	0	low
25	41	csn-miR8005c-p3_1ss12AG	TAGGGTTTAGGGTTTAGGGTT	21	Sc0001135	-	487369	487571	ggtttagggtttagagttttaggatttaggttttaggatttagtgtttagtgtttAGTGTTTAGGGTTTAGGGTTTAGGatttagggtttaggatttaggatttaggatttagtgtttagggtttaggatttaggatttaaggtttagggttttagggtttaggatttagtggttaggattTAGGGTTTAGGGTTTAGGGTTt	1	stu-MIR8005c,	stu-MIR8005c	ggtttagtgtttagaatttaggattaagggtttagggtttagggttagggttcaatgtttggagtttaggatataggatttagggtttaggatttagggtttagggattagagtttaggatttagagtttagggtttagagtttgcgtttaggttttagggtttaggcttttgtTTTAGAGTTTAAGGTTTAGAGTTT	stu-MIR8005c-p3	tagggtttaggatttagggtt	3'	New	gp1	..........((((((..((((..((((..(..(((...((((.....((..((....(((..(..((..(..((...(((.....)))...))..)..))..)..)))..))..))......))))...)))..)..))))..))))..))))))...............................................	146	34	-9.8	0.1	9.5	15	9	0	8	0	9.7826	12.9153	9.6579	0	7.95911	0	middle
26	42	csn-miR8005a-p5_1ss11AG	AGGGTTTAGGGTTTAGGGTTT	21	Sc0000703	-	89603	89731	tttagggtttagggttttAGGGTTTAGGGTTTAGGGTTTagggtttagggtttaagggtTAGGGTTTAGGGTTTAGGGTTtaggggttagggtttagggtttacgggtttagggtttagggtttagggt	1	stu-MIR8005a,	stu-MIR8005a	TTTAGAGTTTAAGGTTTAGAGTTTaaggtttggggtttagggtttagggttaagagtatcatggttagggtttagggtttaggggttaggatatagggtttaggatttagggtttagagtttagggt	stu-MIR8005a-p5	agggtttaggatttagggttt	5'	New	gp1	.(((..(.......)..))).............................................................................................................	19	43.4	-0.4	0	8.5	6.5	5	0	0	0	8.75285	5.59662	5.3655	0	0	0	low
26	43	csn-miR8005a-p3_1ss12AG	TAGGGTTTAGGGTTTAGGGTT	21	Sc0000703	-	89603	89731	tttagggtttagggttttAGGGTTTAGGGTTTAGGGTTTagggtttagggtttaagggtTAGGGTTTAGGGTTTAGGGTTtaggggttagggtttagggtttacgggtttagggtttagggtttagggt	1	stu-MIR8005a,	stu-MIR8005a	TTTAGAGTTTAAGGTTTAGAGTTTaaggtttggggtttagggtttagggttaagagtatcatggttagggtttagggtttaggggttaggatatagggtttaggatttagggtttagagtttagggt	stu-MIR8005a-p3	tagggtttaggatttagggtt	3'	New	gp1	.(((..(.......)..))).............................................................................................................	19	43.4	-0.4	0	9.5	15	9	0	8	0	9.7826	12.9153	9.6579	0	7.95911	0	middle
1	1	csn-miR156d-p5	ACAGAAGAGAGTGAGCACACT	21	Sc0000868	+	508066	508162	tttgactgACAGAAGAGAGTGAGCACACTacaggcaattgtataaaagtgtatataattgtgggatacgtgTGTTCACTTCTCTTCTGTCAGTttta	8	ptc-MIR156f,mdm-MIR156d,mdm-MIR156l,lus-MIR156a,tcc-MIR156c,ghr-MIR156d,hci-MIR156a,ama-MIR156,	mdm-MIR156d	tggactagtagcgagtggtggTGACAGAAGAGAGTGAGCACactcgggcaattgtataaagccatacctttgcgtgatgtgtgctcacttctctttctgtcagccgcacgccgcccyccgccca	mdm-MIR156d-p5	ACAGAAGAGAGTGAGCACact	5'	New	gp2a	...(((((((((((((((((((((((((.....(((((((((((......))))))))))).......)))))))))).)))))))))))))))...	91	37.1	-49.6	1.4	0	0	0	2	0	4	0	0	0	2.59408	0	3.1531	low
1	2	csn-miR156f-p3_2ss3CT22CT	TGTTCACTTCTCTTCTGTCAGT	22	Sc0000868	+	508066	508162	tttgactgACAGAAGAGAGTGAGCACACTacaggcaattgtataaaagtgtatataattgtgggatacgtgTGTTCACTTCTCTTCTGTCAGTttta	8	ptc-MIR156f,mdm-MIR156d,mdm-MIR156l,lus-MIR156a,tcc-MIR156c,ghr-MIR156d,hci-MIR156a,ama-MIR156,	ptc-MIR156f	agagaaagacTGACAGAAGAGAGTGAGCACacacgaaagctaattgtatgaaagcataccattgcagggtgtgtgctcacttctcttctgtcagcttacat	ptc-MIR156f-p3	tgctcacttctcttctgtcagc	3'	New	gp2a	...(((((((((((((((((((((((((.....(((((((((((......))))))))))).......)))))))))).)))))))))))))))...	91	37.1	-49.6	1.4	1020.5	956.5	992.5	1389	1794.5	2912.5	1050.86	823.564	1065.05	1801.59	1785.33	2295.85	high
2	1	csn-miR156d-p5	ACAGAAGAGAGTGAGCACACT	21	Sc0005741	+	4883	4975	tgtctgACAGAAGAGAGTGAGCACACTacaaacaattgtataaaagattataccattgtgtggtgtgtgTGCTCACTTCTCTTCTGTCAGCtt	8	ptc-MIR156f,ptc-MIR156a,mdm-MIR156d,mdm-MIR156l,lus-MIR156a,tcc-MIR156c,ghr-MIR156d,ama-MIR156,	mdm-MIR156d	tggactagtagcgagtggtggTGACAGAAGAGAGTGAGCACactcgggcaattgtataaagccatacctttgcgtgatgtgtgctcacttctctttctgtcagccgcacgccgcccyccgccca	mdm-MIR156d-p5	ACAGAAGAGAGTGAGCACact	5'	New	gp2a	.(.((((((((((((((((((((((((((..(((((.((((((....)))))).)))))...))).)))))))))).))))))))))))))..	90	39.8	-52.6	1.4	0	0	0	2	0	4	0	0	0	2.59408	0	3.1531	low
2	3	csn-miR156f-p3	TGCTCACTTCTCTTCTGTCAGC	22	Sc0005741	+	4883	4975	tgtctgACAGAAGAGAGTGAGCACACTacaaacaattgtataaaagattataccattgtgtggtgtgtgTGCTCACTTCTCTTCTGTCAGCtt	8	ptc-MIR156f,ptc-MIR156a,mdm-MIR156d,mdm-MIR156l,lus-MIR156a,tcc-MIR156c,ghr-MIR156d,ama-MIR156,	ptc-MIR156f	agagaaagacTGACAGAAGAGAGTGAGCACacacgaaagctaattgtatgaaagcataccattgcagggtgtgtgctcacttctcttctgtcagcttacat	ptc-MIR156f-p3	tgctcacttctcttctgtcagc	3'	New	gp2a	.(.((((((((((((((((((((((((((..(((((.((((((....)))))).)))))...))).)))))))))).))))))))))))))..	90	39.8	-52.6	1.4	2808.5	5231.5	2595.5	3014	3471.5	4916.5	2892.04	4504.42	2785.23	3909.28	3453.76	3875.55	high
3	4	csn-miR156f_1ss12TA	TTGACAGAAGAAAGAGAGCAC	21	Sc0001113	+	24009	24168	tttagtatctacattggggagaggaggcattggtgatgatgTTGACAGAAGAAAGAGAGCACagatgatggaaagtgcatgaagtatgcacttctcactctttgTGCTCTCTATTCTTTTGTCATCaccttctgcccctcgcttcattggatatactcat	12	vvi-MIR156i,ath-MIR156h,stu-MIR156c,aly-MIR156h,ppe-MIR156b,lus-MIR156d,cme-MIR156f,tcc-MIR156e,cpa-MIR156e,smo-MIR156c,smo-MIR156b,vun-MIR156b,	vvi-MIR156i	ggtgacgttgTTGACAGAAGATAGAGAGCACagatgatgaaatgcaaggagccagcatctcactcctttgtgctctctattcttctgtcatcaccttaaggcc	vvi-miR156f	TTGACAGAAGATAGAGAGCAC	5'	Diff	gp2a	...(((((...((.((..(.((((.((((..(((((......(((((((((((((((((((((((.((((..(((((((((...)))))))))..)).)))))))))))))).))))))))))))))))...)))))))).)..)).))...)))))...	154	42.5	-77.5	1.1	9	19	19	36	17	63.5	9.26772	16.3593	20.3889	46.6934	16.9131	50.0554	middle
3	5	csn-miR156i-p3_1ss15CT	TGCTCTCTATTCTTTTGTCATC	22	Sc0001113	+	24009	24168	tttagtatctacattggggagaggaggcattggtgatgatgTTGACAGAAGAAAGAGAGCACagatgatggaaagtgcatgaagtatgcacttctcactctttgTGCTCTCTATTCTTTTGTCATCaccttctgcccctcgcttcattggatatactcat	12	vvi-MIR156i,ath-MIR156h,stu-MIR156c,aly-MIR156h,ppe-MIR156b,lus-MIR156d,cme-MIR156f,tcc-MIR156e,cpa-MIR156e,smo-MIR156c,smo-MIR156b,vun-MIR156b,	vvi-MIR156i	ggtgacgttgTTGACAGAAGATAGAGAGCACagatgatgaaatgcaaggagccagcatctcactcctttgtgctctctattcttctgtcatcaccttaaggcc	vvi-MIR156i-p3	tgctctctattcttctgtcatc	3'	New	gp2a	...(((((...((.((..(.((((.((((..(((((......(((((((((((((((((((((((.((((..(((((((((...)))))))))..)).)))))))))))))).))))))))))))))))...)))))))).)..)).))...)))))...	154	42.5	-77.5	1.1	0	0	0	0	0	10	0	0	0	0	0	7.88274	low
4	6	csn-miR156h_L+1	TTGACAGAAGAAAGAGAGCAC	21	xpSc0054009	-	102036	102164	gaagatagaggtgctgacattgTTGACAGAAGATAGAGAGCACagatgatgaaatgcattgtatttactgtatctcactcctgtgtgctctctgtacttctgtcattactgcttcaaccctttatcaac	5	ath-MIR156h,aly-MIR156h,ppe-MIR156b,lus-MIR156d,smo-MIR156c,	ath-MIR156h	atgaaaaatgtTGACAGAAGAAAGAGAGCACaacctgggattagcaaaaagatagttttgcccttgtcgggagtgtgctctctttccttctgccaccatcattgcg	ath-miR156h	TGACAGAAGAAAGAGAGCAC	5'	Diff	gp2a	...((((((((...(((....(((((((((((((((((((((((...(((((.(((((.((....)).))))).))).))...)))))))))))).)))))))))..))....)))..))))))))...	123	40.3	-50.9	1	9	19	19	36	17	63.5	9.26772	16.3593	20.3889	46.6934	16.9131	50.0554	middle
5	7	csn-miR160b	CGCCTGGCTCCCTGTATGCCA	21	Sc0003236	-	234930	235024	attggtcCGCCTGGCTCCCTGGATGCCAattgagaagcaagtcaaaaatcttgactctcttcctggttggcaccagaggagtcatgcagacctaa	2	ppt-MIR160i,ppt-MIR160b,	ppt-MIR160b	atgctagatcCGCCTGGCTCCCTGTATGCCAactgcgagccttgctaaatatttgtttgccttgattcatagctggcgttcagggagtcaagcagaccttgcg	ppt-miR160b	CGCCTGGCTCCCTGTATGCCA	5'	Yes	gp2a	...((((.((.(((((((((((.(((((((...((((..((((((.....))))))..))))...))))))))))).))))))).)).))))...	89	50.5	-49.3	1	0	6	5	5	0	0	0	5.16611	5.3655	6.4852	0	0	low
6	8	csn-miR160a_L+1	CTGCCTGGCTCCCTGTATGCCA	22	Sc0004546	-	666	761	aatggcCTGCCTGGCTCCCTGGATGCCAattaagaagcagttcaaaagtctttgattctctttttaattggcaccagaggagccatgcggacctaa	6	ppt-MIR160f,ppt-MIR160a,ppt-MIR160e,smo-MIR160a,smo-MIR160b,pab-MIR160b,	ppt-MIR160e	ctgcagaaatcaatgggggaaactggcacTGCCTGGCTCCCTGTATGCCActtgcgaattttggcaaaacttgtggcagggtacgtagctgccatacagggagtcagacagaccttgcatcttcccggattctcatga	ppt-miR160a	TGCCTGGCTCCCTGTATGCCA	5'	Diff	gp2a	...((.((((.(((((((((((.((((((((((((((.((.(((((....)))))..)))))))))))))))))))).))))))).)))).))...	90	46.9	-52.7	1.2	21	32	19	7	11	17	21.6247	27.5526	20.3889	9.07927	10.9438	13.4007	middle
7	9	csn-miR162a-5p_R-1_1ss5GC	TGGACGCAGCGGTTCATCGAT	21	Sc0005463	+	2777	2917	gtggaggtgtgaattgtttggttgaggtcacTGGACGCAGCGGTTCATCGATctgttccctgaactggttgtgtattcataaatatacagaacaggaatcggTCGATAAACCTCTGCATCCAGCgcttaccccacctctct	34	vvi-MIR162,mtr-MIR162,gma-MIR162a,gma-MIR162c,gma-MIR162b,ptc-MIR162a,ptc-MIR162b,ath-MIR162a,ath-MIR162b,stu-MIR162a,stu-MIR162b,mdm-MIR162b,mdm-MIR162a,aly-MIR162a,aly-MIR162b,ppe-MIR162,nta-MIR162a,nta-MIR162b,mes-MIR162,lus-MIR162a,lus-MIR162b,cme-MIR162,bra-MIR162,tcc-MIR162,cpa-MIR162a,ghr-MIR162a,rco-MIR162,csi-MIR162,vun-MIR162,htu-MIR162a,aau-MIR162,cln-MIR162,hpe-MIR162a,osa-MIR162a,	ath-MIR162b	gagtgaagtcgcTGGAGGCAGCGGTTCATCGATCaattcctgtgaatatttatttttgtttacaaaagcaagaatcgaTCGATAAACCTCTGCATCCAGcgctgcttgctc	ath-miR162a-5p	TGGAGGCAGCGGTTCATCGATC	5'	Diff	gp2a	..(((((((..........((...((((..(((((.((((.((((.(((((((..((.((((......(((((((((....)))))))))..))))))..))))))).)))).)))).))))).))))..)))))))))..	137	48.2	-52.8	0.8	35.5	71.5	43.5	43	47.5	76	36.556	61.5628	46.6799	55.7727	47.2572	59.9088	middle
7	10	csn-miR162_R+1	TCGATAAACCTCTGCATCCAGT	22	Sc0005463	+	2777	2917	gtggaggtgtgaattgtttggttgaggtcacTGGACGCAGCGGTTCATCGATctgttccctgaactggttgtgtattcataaatatacagaacaggaatcggTCGATAAACCTCTGCATCCAGCgcttaccccacctctct	34	vvi-MIR162,mtr-MIR162,gma-MIR162a,gma-MIR162c,gma-MIR162b,ptc-MIR162a,ptc-MIR162b,ath-MIR162a,ath-MIR162b,stu-MIR162a,stu-MIR162b,mdm-MIR162b,mdm-MIR162a,aly-MIR162a,aly-MIR162b,ppe-MIR162,nta-MIR162a,nta-MIR162b,mes-MIR162,lus-MIR162a,lus-MIR162b,cme-MIR162,bra-MIR162,tcc-MIR162,cpa-MIR162a,ghr-MIR162a,rco-MIR162,csi-MIR162,vun-MIR162,htu-MIR162a,aau-MIR162,cln-MIR162,hpe-MIR162a,osa-MIR162a,	vvi-MIR162	tgaagtcactggatgcagcggttcatcgatctcttcctgaaattgttgtgaaaaaagcagatcaagaatcggTCGATAAACCTCTGCATCCAGcgttcactcc	vvi-miR162	TCGATAAACCTCTGCATCCAG	3'	Diff	gp2a	..(((((((..........((...((((..(((((.((((.((((.(((((((..((.((((......(((((((((....)))))))))..))))))..))))))).)))).)))).))))).))))..)))))))))..	137	48.2	-52.8	0.8	42.5	47	27.5	20	11	14.5	43.7643	40.4679	29.5103	25.9408	10.9438	11.43	middle
8	9	csn-miR162a-5p_R-1_1ss5GC	TGGACGCAGCGGTTCATCGAT	21	xfSc0006692	+	4006	4136	tttgagatggttcaggtcacTGGACGCAGCGGTTCATCGATctgttccctgaactggttgtgttctccaaatttacagaacaggaatcggTCGATAAACCTCTGCATCCAGcgttcaccacacctctctct	34	vvi-MIR162,mtr-MIR162,gma-MIR162a,gma-MIR162c,gma-MIR162b,ptc-MIR162b,ptc-MIR162a,ath-MIR162a,ath-MIR162b,stu-MIR162b,stu-MIR162a,mdm-MIR162b,mdm-MIR162a,aly-MIR162a,aly-MIR162b,ppe-MIR162,nta-MIR162a,nta-MIR162b,mes-MIR162,lus-MIR162a,lus-MIR162b,cme-MIR162,bra-MIR162,tcc-MIR162,cpa-MIR162a,ghr-MIR162a,rco-MIR162,csi-MIR162,vun-MIR162,htu-MIR162a,aau-MIR162,hpe-MIR162a,osa-MIR162a,bdi-MIR162,	ath-MIR162b	gagtgaagtcgcTGGAGGCAGCGGTTCATCGATCaattcctgtgaatatttatttttgtttacaaaagcaagaatcgaTCGATAAACCTCTGCATCCAGcgctgcttgctc	ath-miR162a-5p	TGGAGGCAGCGGTTCATCGATC	5'	Diff	gp2a	...((((.(((...(((..(((((.((((.((((.(((((((..((((.((..(((...((.........))...)))..))))))..))))))).)))).)))).))))).....)))..)))))))...	125	48.9	-46.8	0.7	35.5	71.5	43.5	43	47.5	76	36.556	61.5628	46.6799	55.7727	47.2572	59.9088	middle
8	11	csn-miR162_1ss20AG	TCGATAAACCTCTGCATCCGG	21	xfSc0006692	+	4006	4136	tttgagatggttcaggtcacTGGACGCAGCGGTTCATCGATctgttccctgaactggttgtgttctccaaatttacagaacaggaatcggTCGATAAACCTCTGCATCCAGcgttcaccacacctctctct	34	vvi-MIR162,mtr-MIR162,gma-MIR162a,gma-MIR162c,gma-MIR162b,ptc-MIR162b,ptc-MIR162a,ath-MIR162a,ath-MIR162b,stu-MIR162b,stu-MIR162a,mdm-MIR162b,mdm-MIR162a,aly-MIR162a,aly-MIR162b,ppe-MIR162,nta-MIR162a,nta-MIR162b,mes-MIR162,lus-MIR162a,lus-MIR162b,cme-MIR162,bra-MIR162,tcc-MIR162,cpa-MIR162a,ghr-MIR162a,rco-MIR162,csi-MIR162,vun-MIR162,htu-MIR162a,aau-MIR162,hpe-MIR162a,osa-MIR162a,bdi-MIR162,	vvi-MIR162	tgaagtcactggatgcagcggttcatcgatctcttcctgaaattgttgtgaaaaaagcagatcaagaatcggTCGATAAACCTCTGCATCCAGcgttcactcc	vvi-miR162	TCGATAAACCTCTGCATCCAG	3'	Diff	gp2a	...((((.(((...(((..(((((.((((.((((.(((((((..((((.((..(((...((.........))...)))..))))))..))))))).)))).)))).))))).....)))..)))))))...	125	48.9	-46.8	0.7	25	25.5	14	9	9	10.5	25.7437	21.956	15.0234	11.6734	8.954	8.27688	middle
9	12	csn-miR162a_R+1	TCGATAAACCTCTGCATCCAGT	22	xfSc0009875	-	18	160	tgtggaggtgtgaattgtttggttgaggtcactggacgcagcggttcatcgatctgttccctgaactggttgtgtattcataaatatacagaacaggaatcggTCGATAAACCTCTGCATCCAGCgcttaccccacctctctc	7	ptc-MIR162b,bra-MIR162,htu-MIR162a,cln-MIR162,hpe-MIR162a,osa-MIR162a,bdi-MIR162,	ptc-MIR162b	tgagaagacactggaggcagcggttcatcgatcttttcctgaagatttttttgttttacacgaacaacacgaaccgaTCGATAAACCTCTGCATCCAGtgcttccct	ptc-miR162a	TCGATAAACCTCTGCATCCAG	3'	Diff	gp2a	...(((((((..........((...((((..(((((.((((.((((.(((((((..((.((((......(((((((((....)))))))))..))))))..))))))).)))).)))).))))).))))..)))))))))...	137	48.3	-52.8	0.8	42.5	47	27.5	20	11	14.5	43.7643	40.4679	29.5103	25.9408	10.9438	11.43	middle
10	13	csn-miR164a_L+1_2	CTGGAGAAGCAGGGCACGTGCA	22	Sc0000233	-	1011488	1011608	gatgggtgagtagctcttgTTGGAGAAGCAGGGCACGTGCAagttctcagaattctcacgtgctagtgagcaagctactctgcacgtgctccccttctccaacatgggtttctcactccca	117	vvi-MIR164c,vvi-MIR164d,vvi-MIR164a,vvi-MIR164b,mtr-MIR164c,mtr-MIR164a,mtr-MIR164b,mtr-MIR164d,gma-MIR164i,gma-MIR164g,gma-MIR164d,gma-MIR164a,gma-MIR164e,gma-MIR164j,gma-MIR164b,gma-MIR164f,gma-MIR164k,gma-MIR164h,gma-MIR164c,ptc-MIR164e,ptc-MIR164a,ptc-MIR164b,ptc-MIR164c,ptc-MIR164d,ptc-MIR164f,ath-MIR164b,ath-MIR164a,ath-MIR164c,gra-MIR164a,stu-MIR164,mdm-MIR164f,mdm-MIR164d,mdm-MIR164c,mdm-…	vvi-MIR164a	agctccttgtTGGAGAAGCAGGGCACGTGCAgatttgcctcacttttcccccttttttcttctttactcccaccaccgcccacaggcttgcacgtgctccccttctccaacatgggttcct	vvi-miR164a	TGGAGAAGCAGGGCACGTGCA	5'	Diff	gp2a	...(((((((.(((((.(((((((((((..((((((((((((((....((....(((((......)))))....))))).)))))))))))..))))))))))).))))).)))))))...	115	52.9	-64	1	1752	1357	1712.5	749	560.5	785.5	1804.12	1168.4	1837.68	971.482	557.635	619.189	high
11	14	csn-miR164a	TGGAGAAGCAGGGCACGTGCA	21	Sc0000486	-	743296	743421	ttcgtcgaacagtaggtgggcagctccttgtTGGAGAAGCAGGGCACGTGCAaaaagctaatgctagtaagttttgtgcacgtgctccccttctccaacgtgggttccctcacctccctcgattgc	117	vvi-MIR164c,vvi-MIR164d,vvi-MIR164a,vvi-MIR164b,mtr-MIR164c,mtr-MIR164a,mtr-MIR164b,mtr-MIR164d,gma-MIR164i,gma-MIR164g,gma-MIR164d,gma-MIR164a,gma-MIR164e,gma-MIR164j,gma-MIR164b,gma-MIR164f,gma-MIR164k,gma-MIR164h,gma-MIR164c,ptc-MIR164e,ptc-MIR164a,ptc-MIR164b,ptc-MIR164c,ptc-MIR164d,ptc-MIR164f,ath-MIR164b,ath-MIR164a,ath-MIR164c,gra-MIR164a,stu-MIR164,mdm-MIR164f,mdm-MIR164d,mdm-MIR164c,mdm-…	vvi-MIR164a	agctccttgtTGGAGAAGCAGGGCACGTGCAgatttgcctcacttttcccccttttttcttctttactcccaccaccgcccacaggcttgcacgtgctccccttctccaacatgggttcct	vvi-miR164a	TGGAGAAGCAGGGCACGTGCA	5'	Yes	gp2a	...(((((.....(((((((.(((((..(((((((((((..(((((((((((.((((((.((....)).)))))).)))))))))))..))))))))))).))))).)).)))))...)))))...	120	54	-62.5	0.9	40953	32730	26869.5	14409	14051.5	21478.5	42171.2	28181.1	28833.7	18689	13979.7	16930.9	high
12	15	csn-miR166g-5p	GGAATGTTGTCTGGCTCGAGG	21	Sc0000898	-	116567	116707	cttttgaggGGAATGTTGTCTGGCTCGAGGaccctttcttgatcagtatctattgcagatctgaggtattcatagatctgtatacatttatacaagagaaagagatagtgttgTCGGACCAGGCTTCATTCCCCccaatta	159	vvi-MIR166c,vvi-MIR166e,vvi-MIR166g,vvi-MIR166a,vvi-MIR166b,mtr-MIR166g,mtr-MIR166b,mtr-MIR166c,mtr-MIR166f,gma-MIR166b,gma-MIR166a,gma-MIR166c,gma-MIR166l,gma-MIR166u,gma-MIR166n,gma-MIR166o,gma-MIR166q,gma-MIR166t,gma-MIR166s,gma-MIR166m,gma-MIR166j,gma-MIR166r,gma-MIR166k,ptc-MIR166a,ptc-MIR166j,ptc-MIR166k,ptc-MIR166c,ptc-MIR166q,ptc-MIR166n,ptc-MIR166o,ath-MIR166a,ath-MIR166f,ath-MIR166b,ath…	mtr-MIR166g	tttgaggGGAATGTTGTCTGGCTCGAGGacgctttcttctcgatctaatgcaaatttgtggtcatggattgtaaagtattcTCGGACCAGGCTTCATTCCCCccaat	mtr-miR166g-5p	GGAATGTTGTCTGGCTCGAGG	5'	Yes	gp2a	...(((.((((((((..((((((..(((..((.((.((((..((.((((..((((((((((((.........))))))))))...))..))))..))....)))).)).))..)))..))))))..)))))))).)))...	135	41.8	-52.2	0.9	516.5	660	517	440.5	457	741	531.864	568.272	554.793	571.346	454.664	584.111	middle
12	16	csn-miR166a_R+2_1ss1TG	GCGGACCAGGCTTCATTCCCC	21	Sc0000898	-	116567	116707	cttttgaggGGAATGTTGTCTGGCTCGAGGaccctttcttgatcagtatctattgcagatctgaggtattcatagatctgtatacatttatacaagagaaagagatagtgttgTCGGACCAGGCTTCATTCCCCccaatta	159	vvi-MIR166c,vvi-MIR166e,vvi-MIR166g,vvi-MIR166a,vvi-MIR166b,mtr-MIR166g,mtr-MIR166b,mtr-MIR166c,mtr-MIR166f,gma-MIR166b,gma-MIR166a,gma-MIR166c,gma-MIR166l,gma-MIR166u,gma-MIR166n,gma-MIR166o,gma-MIR166q,gma-MIR166t,gma-MIR166s,gma-MIR166m,gma-MIR166j,gma-MIR166r,gma-MIR166k,ptc-MIR166a,ptc-MIR166j,ptc-MIR166k,ptc-MIR166c,ptc-MIR166q,ptc-MIR166n,ptc-MIR166o,ath-MIR166a,ath-MIR166f,ath-MIR166b,ath…	vvi-MIR166b	gttttttgaggggaatgttggctggctcgaggcattcacataagaagaagatatataagtgaaggtgTCGGACCAGGCTTCATTCCtctcaaatataca	vvi-miR166a	TCGGACCAGGCTTCATTCC	3'	Diff	gp2a	...(((.((((((((..((((((..(((..((.((.((((..((.((((..((((((((((((.........))))))))))...))..))))..))....)))).)).))..)))..))))))..)))))))).)))...	135	41.8	-52.2	0.9	3956.5	5247	8577.5	2232	959.5	1326.5	4074.19	4517.76	9204.52	2894.99	954.595	1045.65	high
13	17	csn-miR166g-5p_2ss5GA8GT	AATGAAGTCTGATCCAAGATC	21	Sc0002150	+	261509	261615	aggggtgtctggAATGAAGTCTGATCCAAGATCgatcctttgatgttattgtaattgatgaattatcatggatggaTCTCGGACCAGGCTTCATTCTtcacaccaaa	93	vvi-MIR166a,vvi-MIR166d,vvi-MIR166b,mtr-MIR166b,mtr-MIR166g,mtr-MIR166c,mtr-MIR166f,gma-MIR166t,gma-MIR166b,gma-MIR166n,gma-MIR166j,gma-MIR166o,gma-MIR166u,gma-MIR166q,gma-MIR166s,gma-MIR166r,gma-MIR166k,gma-MIR166m,ptc-MIR166m,ptc-MIR166q,ptc-MIR166i,ptc-MIR166l,ptc-MIR166n,ptc-MIR166o,ptc-MIR166p,ath-MIR166d,ath-MIR166c,ath-MIR166g,ppt-MIR166f,stu-MIR166b,mdm-MIR166d,aly-MIR166b,aly-MIR166c,aly…	osa-MIR166g	agcatggtgtctggAATGGAGGCTGATCCAAGATCattgcttggtgcaaaatactagggcattgttgtaagtgccattagttcttttttgtttccgagtttgttatcgaggatcTCGGACCAGGCTTCATTCCTCacaccgtgct	osa-miR166g-5p	AATGGAGGCTGATCCAAGATC	5'	Diff	gp2a	...(((((..(((((((((((((.(((.(((((.((((..((((((((((......)))))..))))).)))).))))).))).)))))))))))))..)))))...	101	41.1	-51.9	1.2	65	95	76	27	33	35	66.9336	81.7967	81.5556	35.0201	32.8313	27.5896	middle
13	18	csn-miR166i-p3	TCTCGGACCAGGCTTCATTCT	21	Sc0002150	+	261509	261615	aggggtgtctggAATGAAGTCTGATCCAAGATCgatcctttgatgttattgtaattgatgaattatcatggatggaTCTCGGACCAGGCTTCATTCTtcacaccaaa	93	vvi-MIR166a,vvi-MIR166d,vvi-MIR166b,mtr-MIR166b,mtr-MIR166g,mtr-MIR166c,mtr-MIR166f,gma-MIR166t,gma-MIR166b,gma-MIR166n,gma-MIR166j,gma-MIR166o,gma-MIR166u,gma-MIR166q,gma-MIR166s,gma-MIR166r,gma-MIR166k,gma-MIR166m,ptc-MIR166m,ptc-MIR166q,ptc-MIR166i,ptc-MIR166l,ptc-MIR166n,ptc-MIR166o,ptc-MIR166p,ath-MIR166d,ath-MIR166c,ath-MIR166g,ppt-MIR166f,stu-MIR166b,mdm-MIR166d,aly-MIR166b,aly-MIR166c,aly…	cme-MIR166i	tgaggagaatggaaactggttcgagaacgtttgtatggatgaacataaaaagagagtctttcatccgaacgatcTCGGACCAGGCTTCATTCTCgccagct	cme-MIR166i-p3	tcTCGGACCAGGCTTCATTCT	3'	New	gp2a	...(((((..(((((((((((((.(((.(((((.((((..((((((((((......)))))..))))).)))).))))).))).)))))))))))))..)))))...	101	41.1	-51.9	1.2	19947	30373.5	28771	6815	9651	13012	20540.4	26152.1	30874.2	8839.32	9601.67	10257	high
14	18	csn-miR166i-p3	TCTCGGACCAGGCTTCATTCT	21	Sc0004474	-	66504	66602	catagttgaggggagtgctgtctggttcgagactatccatttgaagtgcaaaccatcatctgaatgaTCTCGGACCAGGCTTCATTCCccccaacttgc	93	vvi-MIR166d,vvi-MIR166a,vvi-MIR166f,vvi-MIR166g,mtr-MIR166a,mtr-MIR166b,mtr-MIR166c,mtr-MIR166f,gma-MIR166d,gma-MIR166f,gma-MIR166r,gma-MIR166k,gma-MIR166j,gma-MIR166h,gma-MIR166m,ptc-MIR166i,ptc-MIR166l,ptc-MIR166q,ptc-MIR166n,ptc-MIR166o,ptc-MIR166d,ptc-MIR166e,ath-MIR166c,ath-MIR166f,ath-MIR166g,ath-MIR165a,ath-MIR165b,gra-MIR166c,gra-MIR166d,ppt-MIR166f,stu-MIR166b,mdm-MIR166f,mdm-MIR166d,mdm…	cme-MIR166i	tgaggagaatggaaactggttcgagaacgtttgtatggatgaacataaaaagagagtctttcatccgaacgatcTCGGACCAGGCTTCATTCTCgccagct	cme-MIR166i-p3	tcTCGGACCAGGCTTCATTCT	3'	New	gp2a	...(((((.((((((((..(((((((((((((..((.((..(((.((....))..)))..)).))..)))))))))))))..)))))))).)))))...	93	49.5	-48.2	1	19947	30373.5	28771	6815	9651	13012	20540.4	26152.1	30874.2	8839.32	9601.67	10257	high
15	19	csn-miR166e-5p_1ss20GT	GGAATGTTGGCTGGCTCGATG	21	Sc0002931	+	3123	3250	cgtatgggagtgtttgaggGGAATGTTGGCTGGCTCGATGtcttcacaagaattgtcagacaaaaggattcgatcaataagtgaagataTCGGACCAGGCTTCATTCCTCtcaaaacaagtccatcat	82	vvi-MIR166b,vvi-MIR166a,vvi-MIR166f,mtr-MIR166c,mtr-MIR166f,mtr-MIR166b,mtr-MIR166e,gma-MIR166k,gma-MIR166p,gma-MIR166e,gma-MIR166m,ptc-MIR166q,ptc-MIR166n,ptc-MIR166o,ptc-MIR166d,ptc-MIR166m,ptc-MIR166f,ptc-MIR166p,ath-MIR165a,ath-MIR165b,ppt-MIR166h,ppt-MIR166i,ppt-MIR166k,ppt-MIR166j,ppt-MIR166m,ppt-MIR166l,stu-MIR166b,aly-MIR165b,aly-MIR165a,nta-MIR166b,nta-MIR166f,mes-MIR166j,mes-MIR166a,mes…	mtr-MIR166e	tttgaggGGAATGTTGGCTGGCTCGAGGcttttcagtttcacaaaggaagttcagtcttaattgtatgaactataaggctTCGGACCAGGCTTCATTCCCCtcaaa	mtr-miR166e-5p	GGAATGTTGGCTGGCTCGAGG	5'	Diff	gp2a	...(((((..(((((((((((((((..((((((..((((((((((((....((((...((.........))...))))..))))))))))))..))).))).))))))))))))).))..)))))...	122	43.8	-55.5	1	81	174.5	71	4	4	14	83.4095	150.248	76.1901	5.18816	3.97955	11.0358	middle
15	20	csn-miR166a_R+2_3	TCGGACCAGGCTTCATTCCTC	21	Sc0002931	+	3123	3250	cgtatgggagtgtttgaggGGAATGTTGGCTGGCTCGATGtcttcacaagaattgtcagacaaaaggattcgatcaataagtgaagataTCGGACCAGGCTTCATTCCTCtcaaaacaagtccatcat	82	vvi-MIR166b,vvi-MIR166a,vvi-MIR166f,mtr-MIR166c,mtr-MIR166f,mtr-MIR166b,mtr-MIR166e,gma-MIR166k,gma-MIR166p,gma-MIR166e,gma-MIR166m,ptc-MIR166q,ptc-MIR166n,ptc-MIR166o,ptc-MIR166d,ptc-MIR166m,ptc-MIR166f,ptc-MIR166p,ath-MIR165a,ath-MIR165b,ppt-MIR166h,ppt-MIR166i,ppt-MIR166k,ppt-MIR166j,ppt-MIR166m,ppt-MIR166l,stu-MIR166b,aly-MIR165b,aly-MIR165a,nta-MIR166b,nta-MIR166f,mes-MIR166j,mes-MIR166a,mes…	vvi-MIR166f	tgtagttgtggggaatgttggctggctcgaggctttcttgagtgattttatgtatacctcaaaaagctTCGGACCAGGCTTCATTCCcctcaacacactt	vvi-miR166a	TCGGACCAGGCTTCATTCC	3'	Diff	gp2a	...(((((..(((((((((((((((..((((((..((((((((((((....((((...((.........))...))))..))))))))))))..))).))).))))))))))))).))..)))))...	122	43.8	-55.5	1	263666	343696	313664	90326	120996	228546	271509	295928	336593	117156	120377	180157	high
16	21	csn-miR166g-p5	GTTGAGGGGAATGTTGTCTGG	21	Sc0003075	-	165289	165383	ctctctcattaagaGTTGAGGGGAATGCTGTCTGGttcgcgaccattcatctgaaggatcTCGGACCAGGCTTCATTCCCCccaactcgagaagt	105	vvi-MIR166d,vvi-MIR166a,vvi-MIR166g,vvi-MIR166b,mtr-MIR166a,mtr-MIR166b,mtr-MIR166c,mtr-MIR166f,gma-MIR166t,gma-MIR166d,gma-MIR166f,gma-MIR166s,gma-MIR166r,gma-MIR166u,gma-MIR166j,gma-MIR166h,gma-MIR166k,gma-MIR166m,gma-MIR166l,ptc-MIR166i,ptc-MIR166m,ptc-MIR166l,ptc-MIR166q,ptc-MIR166n,ptc-MIR166o,ath-MIR166c,ath-MIR166g,ath-MIR165a,gra-MIR166c,gra-MIR166d,ppt-MIR166f,ppt-MIR166k,ppt-MIR166j,ppt…	vvi-MIR166g	aacagttgaggggaatgttgtctggttcgagatccttcgtatgaagctcaagcagcgtttgaatgattTCGGACCAGGCTTCATTCCcctcaacccaaaa	vvi-MIR166g-p5	gttgaggggaatgttgtctgg	5'	New	gp2a	...((((.....((((((.((((((((..((((((((((.((((.(((....))))).)).))))))))))..)))))))).))))))))))...	89	51.6	-49.7	1	0	0	2.5	2.5	0	0	0	0	2.68275	3.2426	0	0	low
16	20	csn-miR166a_R+2_3	TCGGACCAGGCTTCATTCCTC	21	Sc0003075	-	165289	165383	ctctctcattaagaGTTGAGGGGAATGCTGTCTGGttcgcgaccattcatctgaaggatcTCGGACCAGGCTTCATTCCCCccaactcgagaagt	105	vvi-MIR166d,vvi-MIR166a,vvi-MIR166g,vvi-MIR166b,mtr-MIR166a,mtr-MIR166b,mtr-MIR166c,mtr-MIR166f,gma-MIR166t,gma-MIR166d,gma-MIR166f,gma-MIR166s,gma-MIR166r,gma-MIR166u,gma-MIR166j,gma-MIR166h,gma-MIR166k,gma-MIR166m,gma-MIR166l,ptc-MIR166i,ptc-MIR166m,ptc-MIR166l,ptc-MIR166q,ptc-MIR166n,ptc-MIR166o,ath-MIR166c,ath-MIR166g,ath-MIR165a,gra-MIR166c,gra-MIR166d,ppt-MIR166f,ppt-MIR166k,ppt-MIR166j,ppt…	vvi-MIR166b	gttttttgaggggaatgttggctggctcgaggcattcacataagaagaagatatataagtgaaggtgTCGGACCAGGCTTCATTCCtctcaaatataca	vvi-miR166a	TCGGACCAGGCTTCATTCC	3'	Diff	gp2a	...((((.....((((((.((((((((..((((((((((.((((.(((....))))).)).))))))))))..)))))))).))))))))))...	89	51.6	-49.7	1	263666	343696	313664	90326	120996	228546	271509	295928	336593	117156	120377	180157	high
17	22	csn-miR166d-5p_L-1R+1_1ss20GA	GAATGTCGTCTGGTTCGAAAT	21	Sc0003918	+	181386	181506	ctctcttgaaaatgttgagggGAATGTCGTCTGGTTCGAAATcattcatgaaatgatactcaaagtacataccatttgaatgatTTCGGACCAGGCTTCATTCCCCtcaacttgaagaaat	63	vvi-MIR166f,vvi-MIR166g,mtr-MIR166e,gma-MIR166e,gma-MIR166p,ptc-MIR166d,ptc-MIR166f,ptc-MIR166e,ath-MIR166a,ath-MIR166f,ath-MIR166g,ath-MIR165a,ppt-MIR166d,ppt-MIR166i,ppt-MIR166c,ppt-MIR166b,ppt-MIR166g,ppt-MIR166h,ppt-MIR166a,stu-MIR166b,stu-MIR166d,mdm-MIR166f,mdm-MIR166e,mdm-MIR166i,mdm-MIR166c,aly-MIR166f,aly-MIR166h,aly-MIR166g,aly-MIR165a,ppe-MIR166b,nta-MIR166g,nta-MIR166c,nta-MIR166e,mes…	stu-MIR166d	AGAATGTCGTCTGGTTCGAGAtctttcataagaaggtaacatgcaatgagatgattTCGGACCAGGCTTCATTCCCC	stu-miR166d-5p	AGAATGTCGTCTGGTTCGAGA	5'	Diff	gp2a	...((((.((...(((((((((((((..((((((((((((((((((((((..(((.(((.....))))))..))..))))))))))))))))))))..))))))))))))))).))))...	115	38.8	-62.1	1.3	5	13	10.5	6.5	9	8	5.14874	11.1932	11.2676	8.43076	8.954	6.30619	middle
17	23	csn-miR166a_L+1R+2	TTCGGACCAGGCTTCATTCCTC	22	Sc0003918	+	181386	181506	ctctcttgaaaatgttgagggGAATGTCGTCTGGTTCGAAATcattcatgaaatgatactcaaagtacataccatttgaatgatTTCGGACCAGGCTTCATTCCCCtcaacttgaagaaat	63	vvi-MIR166f,vvi-MIR166g,mtr-MIR166e,gma-MIR166e,gma-MIR166p,ptc-MIR166d,ptc-MIR166f,ptc-MIR166e,ath-MIR166a,ath-MIR166f,ath-MIR166g,ath-MIR165a,ppt-MIR166d,ppt-MIR166i,ppt-MIR166c,ppt-MIR166b,ppt-MIR166g,ppt-MIR166h,ppt-MIR166a,stu-MIR166b,stu-MIR166d,mdm-MIR166f,mdm-MIR166e,mdm-MIR166i,mdm-MIR166c,aly-MIR166f,aly-MIR166h,aly-MIR166g,aly-MIR165a,ppe-MIR166b,nta-MIR166g,nta-MIR166c,nta-MIR166e,mes…	vvi-MIR166g	aacagttgaggggaatgttgtctggttcgagatccttcgtatgaagctcaagcagcgtttgaatgattTCGGACCAGGCTTCATTCCcctcaacccaaaa	vvi-miR166a	TCGGACCAGGCTTCATTCC	3'	Diff	gp2a	...((((.((...(((((((((((((..((((((((((((((((((((((..(((.(((.....))))))..))..))))))))))))))))))))..))))))))))))))).))))...	115	38.8	-62.1	1.3	52	70	35	2	5.5	13.5	53.5468	60.2713	37.5585	2.59408	5.47189	10.6417	middle
18	24	csn-miR166e-5p_1ss10GT	GGAATGTTGTCTGGCTCGAGG	21	xfSc0017196	+	990	1128	atggtggctttgaggGGAATGTTGGCTGGCTCGAGGctttgctttgcttttcaaatacaagcaaagggatacctctgaatggaatgaattatctcatcaaaggctTCGGACCAGGCTTCATTCCCTtcaaacacacata	119	vvi-MIR166f,vvi-MIR166b,vvi-MIR166c,vvi-MIR166e,mtr-MIR166e,mtr-MIR166g,gma-MIR166r,gma-MIR166e,gma-MIR166b,gma-MIR166a,gma-MIR166n,gma-MIR166m,gma-MIR166c,gma-MIR166l,gma-MIR166o,gma-MIR166u,gma-MIR166q,ptc-MIR166d,ptc-MIR166a,ptc-MIR166f,ptc-MIR166j,ptc-MIR166k,ptc-MIR166q,ptc-MIR166n,ptc-MIR166o,ptc-MIR166c,ath-MIR166a,ath-MIR165a,ath-MIR165b,ppt-MIR166a,ppt-MIR166d,ppt-MIR166i,ppt-MIR166c,ppt…	mtr-MIR166e	tttgaggGGAATGTTGGCTGGCTCGAGGcttttcagtttcacaaaggaagttcagtcttaattgtatgaactataaggctTCGGACCAGGCTTCATTCCCCtcaaa	mtr-miR166e-5p	GGAATGTTGGCTGGCTCGAGG	5'	Diff	gp2a	...(((..(((((((((((((..((((((..(((((((((..(((((((.........)))))))((((((..((..........))..))))))....)))))))))..))).))).)))))))))))))..)))...	133	44.6	-55.8	0.9	516.5	660	517	440.5	457	741	531.864	568.272	554.793	571.346	454.664	584.111	middle
18	25	csn-miR166a_R+2_2	TCGGACCAGGCTTCATTCCCT	21	xfSc0017196	+	990	1128	atggtggctttgaggGGAATGTTGGCTGGCTCGAGGctttgctttgcttttcaaatacaagcaaagggatacctctgaatggaatgaattatctcatcaaaggctTCGGACCAGGCTTCATTCCCTtcaaacacacata	119	vvi-MIR166f,vvi-MIR166b,vvi-MIR166c,vvi-MIR166e,mtr-MIR166e,mtr-MIR166g,gma-MIR166r,gma-MIR166e,gma-MIR166b,gma-MIR166a,gma-MIR166n,gma-MIR166m,gma-MIR166c,gma-MIR166l,gma-MIR166o,gma-MIR166u,gma-MIR166q,ptc-MIR166d,ptc-MIR166a,ptc-MIR166f,ptc-MIR166j,ptc-MIR166k,ptc-MIR166q,ptc-MIR166n,ptc-MIR166o,ptc-MIR166c,ath-MIR166a,ath-MIR165a,ath-MIR165b,ppt-MIR166a,ppt-MIR166d,ppt-MIR166i,ppt-MIR166c,ppt…	vvi-MIR166e	gtgttttgaggggaatgttgtctggctcgaggacaccaactagatctatgatctgcgtgtaattgtgaatgggtgatcgtctctcagttttgaaggagagattttgagtgatctttgatcatgggttggtgtcgTCGGACCAGGCTTCATTCCccccaatttattg	vvi-miR166a	TCGGACCAGGCTTCATTCC	3'	Diff	gp2a	...(((..(((((((((((((..((((((..(((((((((..(((((((.........)))))))((((((..((..........))..))))))....)))))))))..))).))).)))))))))))))..)))...	133	44.6	-55.8	0.9	263666	343696	313664	90326	120996	228546	271509	295928	336593	117156	120377	180157	high
19	26	csn-miR167b_R+1	TGAAGCTGCCAGCATGATCTAG	22	Sc0000176	-	965053	965200	agtctggaggggaataagTGAAGCTGCCAGCATGATCTAGccttggttagtcttagagagggacagagtataagtatgagggagaagagaggagaaactaaccctagctaggtCATGCTCTGGCAGCCTCACTCCTtccctttgggga	71	vvi-MIR167d,vvi-MIR167c,mtr-MIR167a,gma-MIR167b,gma-MIR167d,gma-MIR167a,ptc-MIR167b,ptc-MIR167d,ath-MIR167b,ath-MIR167d,ath-MIR167c,ppt-MIR167,mdm-MIR167e,mdm-MIR167b,aly-MIR167b,aly-MIR167d,aly-MIR167c,ppe-MIR167a,mes-MIR167c,lus-MIR167h,lus-MIR167c,lus-MIR167b,lus-MIR167a,cme-MIR167a,bra-MIR167a,bna-MIR167c,bna-MIR167d,tcc-MIR167b,cpa-MIR167a,cpa-MIR167b,ghr-MIR167a,sly-MIR167b,rco-MIR167a,lja-…	vvi-MIR167d	agggaataagTGAAGCTGCCAGCATGATCTAgctttggctagggatacagagaaagagagagatcagagctaaccctagctaggtcatgccctgacagcctcactccttccttct	vvi-miR167b	TGAAGCTGCCAGCATGATCTA	5'	Diff	gp2a	..((..(((((((...(((((.(((((((((((((((((((...((((((((((.............(((....)))..............))))..))))))...)))))))))))))..)))))).)))))..)))))))..))..	144	50	-62.8	0.8	11863.5	8108.5	6272.5	3285.5	4169	5844.5	12216.4	6981.57	6731.02	4261.42	4147.69	4607.07	high
19	27	csn-miR167d-p3_1ss10AG	CATGCTCTGGCAGCCTCACTCCT	23	Sc0000176	-	965053	965200	agtctggaggggaataagTGAAGCTGCCAGCATGATCTAGccttggttagtcttagagagggacagagtataagtatgagggagaagagaggagaaactaaccctagctaggtCATGCTCTGGCAGCCTCACTCCTtccctttgggga	71	vvi-MIR167d,vvi-MIR167c,mtr-MIR167a,gma-MIR167b,gma-MIR167d,gma-MIR167a,ptc-MIR167b,ptc-MIR167d,ath-MIR167b,ath-MIR167d,ath-MIR167c,ppt-MIR167,mdm-MIR167e,mdm-MIR167b,aly-MIR167b,aly-MIR167d,aly-MIR167c,ppe-MIR167a,mes-MIR167c,lus-MIR167h,lus-MIR167c,lus-MIR167b,lus-MIR167a,cme-MIR167a,bra-MIR167a,bna-MIR167c,bna-MIR167d,tcc-MIR167b,cpa-MIR167a,cpa-MIR167b,ghr-MIR167a,sly-MIR167b,rco-MIR167a,lja-…	ptc-MIR167d	agggaaaaggTGAAGCTGCCAGCATGATCTAtctttggttagagaaggatagaagcgaaagaactaaccctagctaggtcatgctctgacagcctcactccttcc	ptc-MIR167d-p3	catgctctgacagcctcactcct	3'	New	gp2a	..((..(((((((...(((((.(((((((((((((((((((...((((((((((.............(((....)))..............))))..))))))...)))))))))))))..)))))).)))))..)))))))..))..	144	50	-62.8	0.8	40.5	50.5	25	47	91.5	169.5	41.7048	43.4814	26.8275	60.9608	91.0323	133.612	middle
20	26	csn-miR167b_R+1	TGAAGCTGCCAGCATGATCTAG	22	xpSc0055331	+	7492	7619	tgcaggggaacaagTGAAGCTGCCAGCATGATCTAGccttggttagagggataatgtggagagagaggtgagggagaagtctaaccctagctaggtCATGCTCTGACAGCCTCACTCCTtcccctatg	45	vvi-MIR167d,mtr-MIR167a,gma-MIR167b,gma-MIR167d,gma-MIR167a,ptc-MIR167d,ptc-MIR167b,ath-MIR167b,mdm-MIR167b,mdm-MIR167e,aly-MIR167b,ppe-MIR167a,mes-MIR167c,lus-MIR167h,cme-MIR167a,bra-MIR167a,bna-MIR167c,tcc-MIR167b,cpa-MIR167a,cpa-MIR167b,ghr-MIR167a,rco-MIR167a,lja-MIR167c,lja-MIR167a,dpr-MIR167b,osa-MIR167c,osa-MIR167a,osa-MIR167g,osa-MIR167h,bdi-MIR167f,bdi-MIR167b,bdi-MIR167e,sbi-MIR167a,sbi…	vvi-MIR167d	agggaataagTGAAGCTGCCAGCATGATCTAgctttggctagggatacagagaaagagagagatcagagctaaccctagctaggtcatgccctgacagcctcactccttccttct	vvi-miR167b	TGAAGCTGCCAGCATGATCTA	5'	Diff	gp2a	...(((((((..(((((.((((.((((((((((((((...(((((((................................)))))))...)))))))))))))..).)))).)))))..)))))))...	122	52.3	-52.831	0.8	11863.5	8108.5	6272.5	3285.5	4169	5844.5	12216.4	6981.57	6731.02	4261.42	4147.69	4607.07	high
20	27	csn-miR167d-p3_1ss10AG	CATGCTCTGGCAGCCTCACTCCT	23	xpSc0055331	+	7492	7619	tgcaggggaacaagTGAAGCTGCCAGCATGATCTAGccttggttagagggataatgtggagagagaggtgagggagaagtctaaccctagctaggtCATGCTCTGACAGCCTCACTCCTtcccctatg	45	vvi-MIR167d,mtr-MIR167a,gma-MIR167b,gma-MIR167d,gma-MIR167a,ptc-MIR167d,ptc-MIR167b,ath-MIR167b,mdm-MIR167b,mdm-MIR167e,aly-MIR167b,ppe-MIR167a,mes-MIR167c,lus-MIR167h,cme-MIR167a,bra-MIR167a,bna-MIR167c,tcc-MIR167b,cpa-MIR167a,cpa-MIR167b,ghr-MIR167a,rco-MIR167a,lja-MIR167c,lja-MIR167a,dpr-MIR167b,osa-MIR167c,osa-MIR167a,osa-MIR167g,osa-MIR167h,bdi-MIR167f,bdi-MIR167b,bdi-MIR167e,sbi-MIR167a,sbi…	ptc-MIR167d	agggaaaaggTGAAGCTGCCAGCATGATCTAtctttggttagagaaggatagaagcgaaagaactaaccctagctaggtcatgctctgacagcctcactccttcc	ptc-MIR167d-p3	catgctctgacagcctcactcct	3'	New	gp2a	...(((((((..(((((.((((.((((((((((((((...(((((((................................)))))))...)))))))))))))..).)))).)))))..)))))))...	122	52.3	-52.831	0.8	40.5	50.5	25	47	91.5	169.5	41.7048	43.4814	26.8275	60.9608	91.0323	133.612	middle
21	28	csn-miR167c_L-1R+1	GAAGCTGCCAGCATGATCTGA	21	Sc0000267	-	153153	153261	ttatcgtgcaccaccatcagttGAAGCTGCCAGCATGATCTAAatcccttctttgctgaggatagaTTAGATCATGTGGTAGCTTCAcccgttgttggtcccacgaaaa	41	gma-MIR167g,gma-MIR167j,ptc-MIR167e,ppe-MIR167c,nta-MIR167d,mes-MIR167f,mes-MIR167d,mes-MIR167e,cme-MIR167f,cme-MIR167d,cpa-MIR167d,lja-MIR167,csi-MIR167a,gso-MIR167a,dpr-MIR167c,ctr-MIR167,ccl-MIR167a,ccl-MIR167b,atr-MIR167,osa-MIR167g,osa-MIR167f,osa-MIR167h,osa-MIR167d,osa-MIR167j,bdi-MIR167g,bdi-MIR167d,bdi-MIR167e,bdi-MIR167c,sbi-MIR167e,sbi-MIR167f,sbi-MIR167g,sbi-MIR167h,sbi-MIR167d,zma-MI…	gma-MIR167g	cagcagtTGAAGCTGCCAGCATGATCTGagtttaccttctattggtaagaacagatcatgtggctgcttcacctgttg	gma-miR167c	TGAAGCTGCCAGCATGATCTG	5'	Diff	gp2a	...(((((.((((.((.....(((((((((((.((((((((((.((..(((((....)))))..))))))))))))))))))))))).....)).))))..)))))...	103	45.9	-46.8	0.9	9.5	16	12.5	16	22	28.5	9.7826	13.7763	13.4138	20.7526	21.8875	22.4658	middle
21	29	csn-miR167d-p3_1ss8AG	TTAGATCGTGTGGTAGCTTCA	21	Sc0000267	-	153153	153261	ttatcgtgcaccaccatcagttGAAGCTGCCAGCATGATCTAAatcccttctttgctgaggatagaTTAGATCATGTGGTAGCTTCAcccgttgttggtcccacgaaaa	41	gma-MIR167g,gma-MIR167j,ptc-MIR167e,ppe-MIR167c,nta-MIR167d,mes-MIR167f,mes-MIR167d,mes-MIR167e,cme-MIR167f,cme-MIR167d,cpa-MIR167d,lja-MIR167,csi-MIR167a,gso-MIR167a,dpr-MIR167c,ctr-MIR167,ccl-MIR167a,ccl-MIR167b,atr-MIR167,osa-MIR167g,osa-MIR167f,osa-MIR167h,osa-MIR167d,osa-MIR167j,bdi-MIR167g,bdi-MIR167d,bdi-MIR167e,bdi-MIR167c,sbi-MIR167e,sbi-MIR167f,sbi-MIR167g,sbi-MIR167h,sbi-MIR167d,zma-MI…	nta-MIR167d	cactatcagtTGAAGCTGCCAGCATGATCTAaacttacctcttgtaataattaagtttgagggaagattagatcatgtggtagcttcacccgttagttg	nta-MIR167d-p3	ttagatcatgtggtagcttca	3'	New	gp2a	...(((((.((((.((.....(((((((((((.((((((((((.((..(((((....)))))..))))))))))))))))))))))).....)).))))..)))))...	103	45.9	-46.8	0.9	1.5	0	0	0	0	0	1.54462	0	0	0	0	0	low
22	30	csn-miR167c_R+1	TGAAGCTGCCAGCATGATCTGA	22	Sc0002578	-	79066	79176	ttatcgtgcaccactttcagtTGAAGCTGCCAGCATGATCTAAacatacctcctttgttgaggacagaTTAGATCGTGTGGTAGCTTCAcctgttgttggtgtcacgaaaa	50	gma-MIR167g,gma-MIR167j,ptc-MIR167e,ath-MIR167a,aly-MIR167a,ppe-MIR167c,nta-MIR167d,mes-MIR167f,mes-MIR167d,mes-MIR167e,cme-MIR167f,cme-MIR167d,bra-MIR167b,bra-MIR167c,bna-MIR167a,bra-MIR167a,bna-MIR167c,bra-MIR167d,bna-MIR167b,cpa-MIR167d,lja-MIR167,csi-MIR167a,gso-MIR167a,dpr-MIR167c,ctr-MIR167,ccl-MIR167a,ccl-MIR167b,atr-MIR167,osa-MIR167g,osa-MIR167f,osa-MIR167h,osa-MIR167d,osa-MIR167j,bdi-MI…	gma-MIR167g	cagcagtTGAAGCTGCCAGCATGATCTGagtttaccttctattggtaagaacagatcatgtggctgcttcacctgttg	gma-miR167c	TGAAGCTGCCAGCATGATCTG	5'	Diff	gp2a	...((((((((((....(((.(((((((((((.((((((((((.....((((.......)))).....))))))))))))))))))))).)))....))))).)))))...	105	44.1	-54.4	1.1	1303.5	1624.5	987.5	1402	1654.5	2429	1342.28	1398.72	1059.69	1818.45	1646.04	1914.72	high
22	29	csn-miR167d-p3_1ss8AG	TTAGATCGTGTGGTAGCTTCA	21	Sc0002578	-	79066	79176	ttatcgtgcaccactttcagtTGAAGCTGCCAGCATGATCTAAacatacctcctttgttgaggacagaTTAGATCGTGTGGTAGCTTCAcctgttgttggtgtcacgaaaa	50	gma-MIR167g,gma-MIR167j,ptc-MIR167e,ath-MIR167a,aly-MIR167a,ppe-MIR167c,nta-MIR167d,mes-MIR167f,mes-MIR167d,mes-MIR167e,cme-MIR167f,cme-MIR167d,bra-MIR167b,bra-MIR167c,bna-MIR167a,bra-MIR167a,bna-MIR167c,bra-MIR167d,bna-MIR167b,cpa-MIR167d,lja-MIR167,csi-MIR167a,gso-MIR167a,dpr-MIR167c,ctr-MIR167,ccl-MIR167a,ccl-MIR167b,atr-MIR167,osa-MIR167g,osa-MIR167f,osa-MIR167h,osa-MIR167d,osa-MIR167j,bdi-MI…	nta-MIR167d	cactatcagtTGAAGCTGCCAGCATGATCTAaacttacctcttgtaataattaagtttgagggaagattagatcatgtggtagcttcacccgttagttg	nta-MIR167d-p3	ttagatcatgtggtagcttca	3'	New	gp2a	...((((((((((....(((.(((((((((((.((((((((((.....((((.......)))).....))))))))))))))))))))).)))....))))).)))))...	105	44.1	-54.4	1.1	1.5	0	0	0	0	0	1.54462	0	0	0	0	0	low
23	31	csn-miR167b-5p_R+1	TGAAGCTGCCAGCATGATCTGA	22	Sc0004900	-	90022	90129	ttatcatgcaccacagatagtTGAAGCTGCCAGCATGATCTGAgctttccttatcataggaaaaaatAGATCATATGGCAGCTTCACCcgtcaatgggagcatggaaa	51	mtr-MIR167b,gma-MIR167g,gma-MIR167j,ptc-MIR167e,ptc-MIR167h,ath-MIR167d,aly-MIR167d,ppe-MIR167c,mes-MIR167f,mes-MIR167d,mes-MIR167e,lus-MIR167i,lus-MIR167b,cme-MIR167f,cme-MIR167d,bna-MIR167d,cpa-MIR167d,lja-MIR167,csi-MIR167a,gso-MIR167a,dpr-MIR167c,ctr-MIR167,ccl-MIR167a,ccl-MIR167b,atr-MIR167,osa-MIR167g,osa-MIR167f,osa-MIR167h,osa-MIR167d,osa-MIR167j,osa-MIR167e,osa-MIR167i,bdi-MIR167g,bdi-MI…	mtr-MIR167b	caatgacagtTGAAGCTGCCAGCATGATCTGtgctttccttcctgtgtatatactttaatttccagctgaatttaaatataaccaaaaaaataaatatgtttggtctaaattttgatcaaacttatatatatttttgcttatgtttaagtctggggtgagtttatttgtggtaagaacaGATCATGTTGGAGCTTCACCtgttaaat	mtr-miR167b-5p	TGAAGCTGCCAGCATGATCTG	5'	Diff	gp2a	...((((((.(((..(((...(((((((((((..((((((((...((((((......))))))...)))))))).)))))))))))...)))..)))..))))))...	102	42.6	-49.3	1.1	1303.5	1624.5	987.5	1402	1654.5	2429	1342.28	1398.72	1059.69	1818.45	1646.04	1914.72	high
23	32	csn-miR167f-3p_2ss8GA15TC	AGATCATATGGCAGCTTCACC	21	Sc0004900	-	90022	90129	ttatcatgcaccacagatagtTGAAGCTGCCAGCATGATCTGAgctttccttatcataggaaaaaatAGATCATATGGCAGCTTCACCcgtcaatgggagcatggaaa	51	mtr-MIR167b,gma-MIR167g,gma-MIR167j,ptc-MIR167e,ptc-MIR167h,ath-MIR167d,aly-MIR167d,ppe-MIR167c,mes-MIR167f,mes-MIR167d,mes-MIR167e,lus-MIR167i,lus-MIR167b,cme-MIR167f,cme-MIR167d,bna-MIR167d,cpa-MIR167d,lja-MIR167,csi-MIR167a,gso-MIR167a,dpr-MIR167c,ctr-MIR167,ccl-MIR167a,ccl-MIR167b,atr-MIR167,osa-MIR167g,osa-MIR167f,osa-MIR167h,osa-MIR167d,osa-MIR167j,osa-MIR167e,osa-MIR167i,bdi-MIR167g,bdi-MI…	ptc-MIR167h	cgctattagtTGAAGCTGCCAACATGATCTGagctttccttaattttcctatacaggaaagactAGATCATGTGGCAGTTTCACCtattga	ptc-miR167f-3p	AGATCATGTGGCAGTTTCACC	3'	Diff	gp2a	...((((((.(((..(((...(((((((((((..((((((((...((((((......))))))...)))))))).)))))))))))...)))..)))..))))))...	102	42.6	-49.3	1.1	463	662	503	798	1512	1536	476.773	569.994	539.769	1035.04	1504.27	1210.79	middle
24	33	csn-miR167b_L-1R+1	GAAGCTGCCAGCATGATCTAG	21	Sc0002368	-	238262	238363	tacctctctgatgatgttggttctttcttccgaatctcctattttctgatgatgatgtgttggtttgagagcttGAAGCTGCCAGCATGATCTAGtgagacc	75	vvi-MIR167d,vvi-MIR167c,vvi-MIR167a,mtr-MIR167a,gma-MIR167b,gma-MIR167a,gma-MIR167d,ptc-MIR167b,ptc-MIR167d,ath-MIR167b,ath-MIR167a,ath-MIR167d,ath-MIR167c,gra-MIR167a,ppt-MIR167,mdm-MIR167b,mdm-MIR167e,aly-MIR167b,aly-MIR167a,aly-MIR167d,aly-MIR167c,ppe-MIR167a,mes-MIR167c,lus-MIR167c,lus-MIR167h,lus-MIR167b,lus-MIR167a,cme-MIR167a,bra-MIR167b,bra-MIR167c,bna-MIR167a,bra-MIR167d,bna-MIR167b,bra-…	vvi-MIR167d	agggaataagTGAAGCTGCCAGCATGATCTAgctttggctagggatacagagaaagagagagatcagagctaaccctagctaggtcatgccctgacagcctcactccttccttct	vvi-miR167b	TGAAGCTGCCAGCATGATCTA	3'	Diff	gp2a	...(((.(((((.((((((((.((((((..((((((...(((..((....))..)))....))))))..))...))))..)))))))).))).)).)))...	96	43.1	-30.4	0.7	775	521	607.5	313.5	213	302.5	798.054	448.591	651.908	406.622	211.911	238.453	middle
25	34	csn-miR168_1ss5TG	TCGCGTGGTGCAGGTCGGGAA	21	Sc0000403	+	906907	907040	atgttgcggcagactctaatTCGCTTGGTGCAGGTCGGGAActacttcgctggcggcggcgattgattctgattgattcggggggcgaatcgggtCCCGCCTTGCATCAACTGAATTggagactgccgtgaact	35	vvi-MIR168,mtr-MIR168c,mtr-MIR168b,gma-MIR168b,gma-MIR168a,ptc-MIR168b,ptc-MIR168a,ath-MIR168a,ath-MIR168b,mdm-MIR168a,mdm-MIR168b,aly-MIR168a,aly-MIR168b,ppe-MIR168,nta-MIR168b,nta-MIR168a,nta-MIR168d,nta-MIR168e,nta-MIR168c,mes-MIR168a,lus-MIR168a,lus-MIR168b,cme-MIR168,bra-MIR168a,bna-MIR168a,bra-MIR168c,bra-MIR168b,tcc-MIR168,sly-MIR168b,rco-MIR168,cca-MIR168a,vun-MIR168,ccl-MIR168,crt-MIR168…	vvi-MIR168	ggtctctaatTCGCTTGGTGCAGGTCGGGAAccgacttcgccgctccggcagcgccggaggcacgcggcggcctacgattggttgctgagcgaattccgatcccgccttgcatcaactgaatcggagacggc	vvi-miR168	TCGCTTGGTGCAGGTCGGGAA	5'	Diff	gp2a	...(..((((((.(((((((((..((((((((((.(((((.((...((((((....))))))............((((((.....)))))).))))))).))))))))))..))))))))).))))))..)...	128	56	-65.9	0.9	38.5	55	71.5	87.5	149	158	39.6453	47.356	76.7267	113.491	148.238	124.547	middle
25	35	csn-miR168c-3p_R+1	CCCGCCTTGCATCAACTGAATT	22	Sc0000403	+	906907	907040	atgttgcggcagactctaatTCGCTTGGTGCAGGTCGGGAActacttcgctggcggcggcgattgattctgattgattcggggggcgaatcgggtCCCGCCTTGCATCAACTGAATTggagactgccgtgaact	35	vvi-MIR168,mtr-MIR168c,mtr-MIR168b,gma-MIR168b,gma-MIR168a,ptc-MIR168b,ptc-MIR168a,ath-MIR168a,ath-MIR168b,mdm-MIR168a,mdm-MIR168b,aly-MIR168a,aly-MIR168b,ppe-MIR168,nta-MIR168b,nta-MIR168a,nta-MIR168d,nta-MIR168e,nta-MIR168c,mes-MIR168a,lus-MIR168a,lus-MIR168b,cme-MIR168,bra-MIR168a,bna-MIR168a,bra-MIR168c,bra-MIR168b,tcc-MIR168,sly-MIR168b,rco-MIR168,cca-MIR168a,vun-MIR168,ccl-MIR168,crt-MIR168…	mtr-MIR168c	ctcacttcgcggtctctaatTCGCTTGGTGCAGGTCGGGAAccactacatccgctgttttcgtagaaaccggcggtgaattggatCCCGCCTTGCATCAACTGAATcggaggccgcggtgaatcta	mtr-miR168c-3p	CCCGCCTTGCATCAACTGAAT	3'	Diff	gp2a	...(..((((((.(((((((((..((((((((((.(((((.((...((((((....))))))............((((((.....)))))).))))))).))))))))))..))))))))).))))))..)...	128	56	-65.9	0.9	35	23	20.5	37.5	43	55.5	36.0411	19.8034	21.9986	48.639	42.7802	43.7492	middle
26	36	csn-miR168	TCGCTTGGTGCAGGTCGGGAA	21	Sc0000403	+	924577	924710	atgttgcggcagactctaatTCGCTTGGTGCAGGTCGGGAActacttcgctggcggcggcgattgattctgattgattcggggggcgaatcgggtCCCGCCTTGCATCAACTGAATtggagactgccgtgaact	37	vvi-MIR168,mtr-MIR168c,mtr-MIR168b,gma-MIR168b,gma-MIR168a,ptc-MIR168b,ptc-MIR168a,ath-MIR168a,ath-MIR168b,mdm-MIR168a,mdm-MIR168b,aly-MIR168a,aly-MIR168b,ppe-MIR168,nta-MIR168d,nta-MIR168a,nta-MIR168b,nta-MIR168e,nta-MIR168c,mes-MIR168a,lus-MIR168a,lus-MIR168b,cme-MIR168,bra-MIR168b,bra-MIR168c,bra-MIR168a,bna-MIR168a,bna-MIR168b,tcc-MIR168,sly-MIR168b,sly-MIR168a,rco-MIR168,cca-MIR168a,vun-MIR1…	vvi-MIR168	ggtctctaatTCGCTTGGTGCAGGTCGGGAAccgacttcgccgctccggcagcgccggaggcacgcggcggcctacgattggttgctgagcgaattccgatcccgccttgcatcaactgaatcggagacggc	vvi-miR168	TCGCTTGGTGCAGGTCGGGAA	5'	Yes	gp2a	...(..((((((.(((((((((..((((((((((.(((((.((...((((((....))))))............((((((.....)))))).))))))).))))))))))..))))))))).))))))..)...	128	56	-65.9	0.9	5493.5	6587	5979	6847	8949	11381.5	5656.92	5671.53	6416.07	8880.83	8903.26	8971.74	high
26	37	csn-miR168c-3p	CCCGCCTTGCATCAACTGAAT	21	Sc0000403	+	924577	924710	atgttgcggcagactctaatTCGCTTGGTGCAGGTCGGGAActacttcgctggcggcggcgattgattctgattgattcggggggcgaatcgggtCCCGCCTTGCATCAACTGAATtggagactgccgtgaact	37	vvi-MIR168,mtr-MIR168c,mtr-MIR168b,gma-MIR168b,gma-MIR168a,ptc-MIR168b,ptc-MIR168a,ath-MIR168a,ath-MIR168b,mdm-MIR168a,mdm-MIR168b,aly-MIR168a,aly-MIR168b,ppe-MIR168,nta-MIR168d,nta-MIR168a,nta-MIR168b,nta-MIR168e,nta-MIR168c,mes-MIR168a,lus-MIR168a,lus-MIR168b,cme-MIR168,bra-MIR168b,bra-MIR168c,bra-MIR168a,bna-MIR168a,bna-MIR168b,tcc-MIR168,sly-MIR168b,sly-MIR168a,rco-MIR168,cca-MIR168a,vun-MIR1…	mtr-MIR168c	ctcacttcgcggtctctaatTCGCTTGGTGCAGGTCGGGAAccactacatccgctgttttcgtagaaaccggcggtgaattggatCCCGCCTTGCATCAACTGAATcggaggccgcggtgaatcta	mtr-miR168c-3p	CCCGCCTTGCATCAACTGAAT	3'	Yes	gp2a	...(..((((((.(((((((((..((((((((((.(((((.((...((((((....))))))............((((((.....)))))).))))))).))))))))))..))))))))).))))))..)...	128	56	-65.9	0.9	163	132	135.5	138.5	136	205	167.849	113.654	145.405	179.64	135.305	161.596	middle
27	36	csn-miR168	TCGCTTGGTGCAGGTCGGGAA	21	Sc0002429	+	124543	124683	ttattgcggcggtctctaatTCGCTTGGTGCAGGTCGGGAActgcttcgccaccggtggcggcggcggcggagatgggtggtttggtggtggcgaattggatCCCGCCTTGCATCAACTGAATcggagaccgcggtgaatg	37	vvi-MIR168,mtr-MIR168c,mtr-MIR168b,gma-MIR168b,gma-MIR168a,ptc-MIR168b,ptc-MIR168a,ath-MIR168a,ath-MIR168b,mdm-MIR168a,mdm-MIR168b,aly-MIR168a,aly-MIR168b,ppe-MIR168,nta-MIR168d,nta-MIR168a,nta-MIR168b,nta-MIR168e,nta-MIR168c,mes-MIR168a,lus-MIR168a,lus-MIR168b,cme-MIR168,bra-MIR168b,bra-MIR168c,bra-MIR168a,bna-MIR168a,bna-MIR168b,tcc-MIR168,sly-MIR168b,sly-MIR168a,rco-MIR168,cca-MIR168a,vun-MIR1…	vvi-MIR168	ggtctctaatTCGCTTGGTGCAGGTCGGGAAccgacttcgccgctccggcagcgccggaggcacgcggcggcctacgattggttgctgagcgaattccgatcccgccttgcatcaactgaatcggagacggc	vvi-miR168	TCGCTTGGTGCAGGTCGGGAA	5'	Yes	gp2a	...(..(.((((((((..((((..((((((((((.(((((.((..(((((((((.(..((....))..)....((..(....)..)))))))))))..)).))))).))))))))))..))))..)))))))).)..)...	135	61	-72	0.8	5493.5	6587	5979	6847	8949	11381.5	5656.92	5671.53	6416.07	8880.83	8903.26	8971.74	high
27	37	csn-miR168c-3p	CCCGCCTTGCATCAACTGAAT	21	Sc0002429	+	124543	124683	ttattgcggcggtctctaatTCGCTTGGTGCAGGTCGGGAActgcttcgccaccggtggcggcggcggcggagatgggtggtttggtggtggcgaattggatCCCGCCTTGCATCAACTGAATcggagaccgcggtgaatg	37	vvi-MIR168,mtr-MIR168c,mtr-MIR168b,gma-MIR168b,gma-MIR168a,ptc-MIR168b,ptc-MIR168a,ath-MIR168a,ath-MIR168b,mdm-MIR168a,mdm-MIR168b,aly-MIR168a,aly-MIR168b,ppe-MIR168,nta-MIR168d,nta-MIR168a,nta-MIR168b,nta-MIR168e,nta-MIR168c,mes-MIR168a,lus-MIR168a,lus-MIR168b,cme-MIR168,bra-MIR168b,bra-MIR168c,bra-MIR168a,bna-MIR168a,bna-MIR168b,tcc-MIR168,sly-MIR168b,sly-MIR168a,rco-MIR168,cca-MIR168a,vun-MIR1…	mtr-MIR168c	ctcacttcgcggtctctaatTCGCTTGGTGCAGGTCGGGAAccactacatccgctgttttcgtagaaaccggcggtgaattggatCCCGCCTTGCATCAACTGAATcggaggccgcggtgaatcta	mtr-miR168c-3p	CCCGCCTTGCATCAACTGAAT	3'	Yes	gp2a	...(..(.((((((((..((((..((((((((((.(((((.((..(((((((((.(..((....))..)....((..(....)..)))))))))))..)).))))).))))))))))..))))..)))))))).)..)...	135	61	-72	0.8	163	132	135.5	138.5	136	205	167.849	113.654	145.405	179.64	135.305	161.596	middle
28	38	csn-miR168-p5	CTCTAATTCGCTTGGTGCAGG	21	Sc0001286	+	19767	19861	CTCTAATTCGCTTGGTGCAGGtcggaaactacttcgccattgattctgattgattcgggggcgaatcgggtcCCGCCTTGCATCAACTGAATcga	36	vvi-MIR168,mtr-MIR168c,mtr-MIR168b,gma-MIR168a,gma-MIR168b,ptc-MIR168a,ptc-MIR168b,ath-MIR168a,ath-MIR168b,mdm-MIR168b,mdm-MIR168a,aly-MIR168a,aly-MIR168b,ppe-MIR168,nta-MIR168d,nta-MIR168a,nta-MIR168e,nta-MIR168c,nta-MIR168b,mes-MIR168a,lus-MIR168b,lus-MIR168a,cme-MIR168,bra-MIR168b,bra-MIR168c,bra-MIR168a,bna-MIR168a,tcc-MIR168,sly-MIR168b,sly-MIR168a,rco-MIR168,cca-MIR168a,vun-MIR168,ccl-MIR16…	vvi-MIR168	ggtctctaatTCGCTTGGTGCAGGTCGGGAAccgacttcgccgctccggcagcgccggaggcacgcggcggcctacgattggttgctgagcgaattccgatcccgccttgcatcaactgaatcggagacggc	vvi-MIR168-p5	ctctaatTCGCTTGGTGCAGG	5'	New	gp2a	.....((((..((((((((((.(((...((..((((((..(((.((.....)).)))..))))))..))...))).))))))))))..))))...	87	51.6	-35.7	0.7	4.5	6	7.5	9.5	12	13	4.63386	5.16611	8.04825	12.3219	11.9387	10.2476	middle
28	39	csn-miR168c-3p_L-1	CCGCCTTGCATCAACTGAAT	20	Sc0001286	+	19767	19861	CTCTAATTCGCTTGGTGCAGGtcggaaactacttcgccattgattctgattgattcgggggcgaatcgggtcCCGCCTTGCATCAACTGAATcga	36	vvi-MIR168,mtr-MIR168c,mtr-MIR168b,gma-MIR168a,gma-MIR168b,ptc-MIR168a,ptc-MIR168b,ath-MIR168a,ath-MIR168b,mdm-MIR168b,mdm-MIR168a,aly-MIR168a,aly-MIR168b,ppe-MIR168,nta-MIR168d,nta-MIR168a,nta-MIR168e,nta-MIR168c,nta-MIR168b,mes-MIR168a,lus-MIR168b,lus-MIR168a,cme-MIR168,bra-MIR168b,bra-MIR168c,bra-MIR168a,bna-MIR168a,tcc-MIR168,sly-MIR168b,sly-MIR168a,rco-MIR168,cca-MIR168a,vun-MIR168,ccl-MIR16…	mtr-MIR168c	ctcacttcgcggtctctaatTCGCTTGGTGCAGGTCGGGAAccactacatccgctgttttcgtagaaaccggcggtgaattggatCCCGCCTTGCATCAACTGAATcggaggccgcggtgaatcta	mtr-miR168c-3p	CCCGCCTTGCATCAACTGAAT	3'	Diff	gp2a	.....((((..((((((((((.(((...((..((((((..(((.((.....)).)))..))))))..))...))).))))))))))..))))...	87	51.6	-35.7	0.7	6.5	7	4	8	7	17	6.69336	6.02713	4.2924	10.3763	6.96422	13.4007	middle
29	40	csn-miR168_1ss5TC	TCGCCTGGTGCAGGTCGGGAA	21	Sc0002307	-	164819	164941	gcagcggactctaatTCGCTTGGTGCAGGTCGGGAActacttcgccggcggcggcgattgattctgattgattcgggggctaatcgGGTCCCGCCTTGCATCAACTGAATcggaggccgccat	47	vvi-MIR168,mtr-MIR168c,mtr-MIR168b,mtr-MIR168a,gma-MIR168b,gma-MIR168a,ptc-MIR168a,ptc-MIR168b,ath-MIR168a,ath-MIR168b,mdm-MIR168a,mdm-MIR168b,aly-MIR168a,aly-MIR168b,ppe-MIR168,nta-MIR168d,nta-MIR168e,nta-MIR168a,nta-MIR168b,nta-MIR168c,mes-MIR168a,lus-MIR168b,lus-MIR168a,cme-MIR168,bra-MIR168a,bna-MIR168a,bra-MIR168b,bra-MIR168c,bna-MIR168b,tcc-MIR168,sly-MIR168b,sly-MIR168a,rco-MIR168,cca-MIR1…	vvi-MIR168	ggtctctaatTCGCTTGGTGCAGGTCGGGAAccgacttcgccgctccggcagcgccggaggcacgcggcggcctacgattggttgctgagcgaattccgatcccgccttgcatcaactgaatcggagacggc	vvi-miR168	TCGCTTGGTGCAGGTCGGGAA	5'	Diff	gp2a	...((((.(((..((((..((((((((((.(((((......((((((....))))))......(((((((..(....)..))))))).))))).))))))))))..))))..))).))))...	117	59.3	-56.2	0.8	331	353.5	649	755.5	421	490	340.846	304.37	696.442	979.913	418.848	386.254	middle
29	41	csn-miR168c-3p_L+3	GATCCCGCCTTGCATCAACTGAAT	24	Sc0002307	-	164819	164941	gcagcggactctaatTCGCTTGGTGCAGGTCGGGAActacttcgccggcggcggcgattgattctgattgattcgggggctaatcgGGTCCCGCCTTGCATCAACTGAATcggaggccgccat	47	vvi-MIR168,mtr-MIR168c,mtr-MIR168b,mtr-MIR168a,gma-MIR168b,gma-MIR168a,ptc-MIR168a,ptc-MIR168b,ath-MIR168a,ath-MIR168b,mdm-MIR168a,mdm-MIR168b,aly-MIR168a,aly-MIR168b,ppe-MIR168,nta-MIR168d,nta-MIR168e,nta-MIR168a,nta-MIR168b,nta-MIR168c,mes-MIR168a,lus-MIR168b,lus-MIR168a,cme-MIR168,bra-MIR168a,bna-MIR168a,bra-MIR168b,bra-MIR168c,bna-MIR168b,tcc-MIR168,sly-MIR168b,sly-MIR168a,rco-MIR168,cca-MIR1…	mtr-MIR168c	ctcacttcgcggtctctaatTCGCTTGGTGCAGGTCGGGAAccactacatccgctgttttcgtagaaaccggcggtgaattggatCCCGCCTTGCATCAACTGAATcggaggccgcggtgaatcta	mtr-miR168c-3p	CCCGCCTTGCATCAACTGAAT	3'	Diff	gp2a	...((((.(((..((((..((((((((((.(((((......((((((....))))))......(((((((..(....)..))))))).))))).))))))))))..))))..))).))))...	117	59.3	-56.2	0.8	8	2.5	4.5	10	0	11.5	8.23798	2.15255	4.82895	12.9704	0	9.06515	middle
30	42	csn-miR168_L-1	CGCTTGGTGCAGGTCGGGAA	20	Sc0004823	+	31092	31222	tgttacgacggactctaattCGCTTGGTGCAGGTCGGGAActacttcgctggtggcggcaattgattttgattgattcgggggcgaatcgggtcctgccttgcatcaactgaatcagagaccgccgtgaac	46	vvi-MIR168,mtr-MIR168c,mtr-MIR168b,mtr-MIR168a,gma-MIR168b,gma-MIR168a,ptc-MIR168a,ptc-MIR168b,ath-MIR168a,ath-MIR168b,mdm-MIR168a,mdm-MIR168b,aly-MIR168a,aly-MIR168b,ppe-MIR168,nta-MIR168d,nta-MIR168a,nta-MIR168b,nta-MIR168e,nta-MIR168c,mes-MIR168a,lus-MIR168b,lus-MIR168a,cme-MIR168,bra-MIR168b,bra-MIR168a,bna-MIR168a,bra-MIR168c,tcc-MIR168,sly-MIR168b,sly-MIR168a,rco-MIR168,cca-MIR168a,vun-MIR1…	vvi-MIR168	ggtctctaatTCGCTTGGTGCAGGTCGGGAAccgacttcgccgctccggcagcgccggaggcacgcggcggcctacgattggttgctgagcgaattccgatcccgccttgcatcaactgaatcggagacggc	vvi-miR168	TCGCTTGGTGCAGGTCGGGAA	5'	Diff	gp2a	..(((((.(((.((((.((((..((((((((((.(((((.((..((((((..(((...(((((......)))))..)))..))))))..)).))))).))))))))))..)))).)))).))).)))))..	127	53.4	-54.5	0.8	121.5	151.5	211.5	205	214.5	272	125.114	130.444	226.961	265.893	213.404	214.411	middle
31	43	csn-miR169k_R-1_2ss18CT20GC	GAGCCAAGGATGAATTGTCC	20	Sc0000062	-	568450	568610	cttacatgaagattaagagtcatacgtttgaTAGCCAAGGATGAATTGTCCgatgccaaattgagggttctttcattttgattcgattgatattggaacccttgtttggtttccAGACAGTCACCTTGGCTAGGCtaacggactcttctttctcatgttag	4	ppe-MIR169k,ppe-MIR169l,tcc-MIR169g,bdi-MIR169h,	ppe-MIR169l	tttttctaaagcattgcatggaaaagaatagagtctaactGAGCCAAGGATGAATTGCCGGcatcgtatattacgcctcaaaatgcaatctatatttgttgaccggcaatttgttcttggctatgttgggctctcttcgttccatgcaatgccatgaaaga	ppe-miR169k	GAGCCAAGGATGAATTGCCGG	5'	Diff	gp2a	((.((((((..(..(((((((...((((...(((((((((.(((.(((((.((..((((((...(((((((.(((.((......)).)))....)))))))..))))))..))..)))))))))))))))))....)))))))))))..)..)))))).))	161	40.4	-63	1	3	3	5	4	18	8	3.08924	2.58306	5.3655	5.18816	17.908	6.30619	middle
31	44	csn-miR169h-3p_L+1R+1_2ss3GA20CG	AGACAGTCACCTTGGCTAGGC	21	Sc0000062	-	568450	568610	cttacatgaagattaagagtcatacgtttgaTAGCCAAGGATGAATTGTCCgatgccaaattgagggttctttcattttgattcgattgatattggaacccttgtttggtttccAGACAGTCACCTTGGCTAGGCtaacggactcttctttctcatgttag	4	ppe-MIR169k,ppe-MIR169l,tcc-MIR169g,bdi-MIR169h,	bdi-MIR169h	cttgcatgagggccagagcctgcttcctccggTAGCCAAGGATGACTTGCCTAtatttgctccttcagaagtcctggttaattacatgccaggtttcagatgagtttggcgataGGCAGTCACCTTGGCTAGCctgagtggctcttgcctcttatggaaggcct	bdi-miR169h-3p	GGCAGTCACCTTGGCTAGC	3'	Diff	gp2a	((.((((((..(..(((((((...((((...(((((((((.(((.(((((.((..((((((...(((((((.(((.((......)).)))....)))))))..))))))..))..)))))))))))))))))....)))))))))))..)..)))))).))	161	40.4	-63	1	0	0	0	0	4	0	0	0	0	0	3.97955	0	low
32	43	csn-miR169k_R-1_2ss18CT20GC	GAGCCAAGGATGAATTGTCC	20	xfSc0000229	+	37017	37187	tcaaagatctttaagggcattgcctggatagaaagagagtgcaatgGAGCCAAGGATGAATTGTCCggaccagtatattaggtgagctaaccctcgcttgtatctctattgacaattcatctcttggctatgttgggctctcttctctttatgtaatgccatgatcttcac	2	ppe-MIR169l,ppe-MIR169k,	ppe-MIR169k	caaagcattgcatggaaaagaatagagtctaactGAGCCAAGGATGAATTGCCGGcattgtatattacccctcaaaatgcaatctatatttgtcgaccggcaatttgttcttggctatgttgggctctcttcgttccatgcaatgccatg	ppe-miR169k	GAGCCAAGGATGAATTGCCGG	5'	Diff	gp2a	...((((((......((((((((.(..(.((.(((((((..((((..((((((((((((((((((......((.((((.(((((((......))))))))))))).....))))))))))).)))))))..))))..))))))))).)..).))))))))..))))))...	165	42.7	-71.1	1	3	3	5	4	18	8	3.08924	2.58306	5.3655	5.18816	17.908	6.30619	middle
33	45	csn-miR169f_R-1_1ss20GA	CAGCCAAGGATGACTTGCCA	20	Sc0000159	-	904698	904857	ggtttagaaagtggagtgCAGCCAAGGATGACTTGCCGactccatgtttatagcttattccttcgaatggggtttaggattatggttgtggtccctctggtctggtatggagatgaagttGGCAAGTTGTCTTTGGCTACAtgcttctttctgctccaca	110	vvi-MIR169g,vvi-MIR169f,vvi-MIR169k,vvi-MIR169j,vvi-MIR169s,vvi-MIR169w,vvi-MIR169c,vvi-MIR169d,vvi-MIR169a,mtr-MIR169g,mtr-MIR169a,mtr-MIR169b,mtr-MIR169l,gma-MIR169b,gma-MIR169f,gma-MIR169g,gma-MIR169u,gma-MIR169v,gma-MIR169a,gma-MIR169m,ptc-MIR169h,ptc-MIR169g,ptc-MIR169f,ptc-MIR169e,ptc-MIR169d,ptc-MIR169b,ptc-MIR169c,ptc-MIR169p,ptc-MIR169a,ptc-MIR169s,ptc-MIR169v,ath-MIR169c,ath-MIR169b,ath…	vvi-MIR169f	gatattatggtgCAGCCAAGGATGACTTGCCGAaaataatttgctcgatcgttaatgtgcttctccagtttctattgcaatttatgcatagggcaatatatatatcctttatagcttgttaattcagatattgactgaggaatcaataatgggcaagttgtgtttggctacatgtttatctcat	vvi-miR169f	CAGCCAAGGATGACTTGCCGA	5'	Diff	gp2a	((..(((((((..(..((.(((((((((..(((((((((((.(((.(..(((.(..((((....))))..).....(((..((....))..)))...........)))..).))).)))))))))))..))))))))).))..)..)))))))..))...	157	46.2	-65.7	0.9	0	6	6	0	17.5	5.5	0	5.16611	6.4386	0	17.4105	4.33551	middle
33	46	csn-miR169b-3p_2ss12C-15CT	GGCAAGTTGTCTTTGGCTACA	21	Sc0000159	-	904698	904857	ggtttagaaagtggagtgCAGCCAAGGATGACTTGCCGactccatgtttatagcttattccttcgaatggggtttaggattatggttgtggtccctctggtctggtatggagatgaagttGGCAAGTTGTCTTTGGCTACAtgcttctttctgctccaca	110	vvi-MIR169g,vvi-MIR169f,vvi-MIR169k,vvi-MIR169j,vvi-MIR169s,vvi-MIR169w,vvi-MIR169c,vvi-MIR169d,vvi-MIR169a,mtr-MIR169g,mtr-MIR169a,mtr-MIR169b,mtr-MIR169l,gma-MIR169b,gma-MIR169f,gma-MIR169g,gma-MIR169u,gma-MIR169v,gma-MIR169a,gma-MIR169m,ptc-MIR169h,ptc-MIR169g,ptc-MIR169f,ptc-MIR169e,ptc-MIR169d,ptc-MIR169b,ptc-MIR169c,ptc-MIR169p,ptc-MIR169a,ptc-MIR169s,ptc-MIR169v,ath-MIR169c,ath-MIR169b,ath…	ath-MIR169b	cccaacggagtagaattgcatgaagtggagtagagtataatgCAGCCAAGGATGACTTGCCGGaacgttgttaaccatgcatatgaataatgtgatgattaattatgtgatgaacatatttctGGCAAGTTGTCCTTCGGCTACAttttgctctcttcttctcatgcaaactttccttggg	ath-miR169b-3p	GGCAAGTTGTCCTTCGGCTACA	3'	Diff	gp2a	((..(((((((..(..((.(((((((((..(((((((((((.(((.(..(((.(..((((....))))..).....(((..((....))..)))...........)))..).))).)))))))))))..))))))))).))..)..)))))))..))...	157	46.2	-65.7	0.9	15.5	20	20.5	14.5	25	15.5	15.9611	17.2204	21.9986	18.8071	24.8722	12.2182	middle
34	47	csn-miR169f_L+2R-2	TGCAGCCAAGGATGACTTGCC	21	Sc0000878	-	87999	88144	aagagggtcttacttgaagaggtagagagtttgaTGCAGCCAAGGATGACTTGCCggcccaacagcaccagtgtgggagatgggtactttcCGGCAAGTTGTCTTTGGCTACatgagtctctctttctctcaagtaagaccttaat	130	vvi-MIR169g,vvi-MIR169a,vvi-MIR169f,vvi-MIR169k,vvi-MIR169j,vvi-MIR169s,vvi-MIR169w,vvi-MIR169m,vvi-MIR169n,vvi-MIR169p,vvi-MIR169q,vvi-MIR169c,vvi-MIR169e,vvi-MIR169d,mtr-MIR169g,mtr-MIR169a,mtr-MIR169b,mtr-MIR169l,mtr-MIR169d,mtr-MIR169e,gma-MIR169b,gma-MIR169f,gma-MIR169g,gma-MIR169u,gma-MIR169v,gma-MIR169a,gma-MIR169m,gma-MIR169s,gma-MIR169h,gma-MIR169e,gma-MIR169d,ptc-MIR169h,ptc-MIR169g,ptc…	vvi-MIR169f	gatattatggtgCAGCCAAGGATGACTTGCCGAaaataatttgctcgatcgttaatgtgcttctccagtttctattgcaatttatgcatagggcaatatatatatcctttatagcttgttaattcagatattgactgaggaatcaataatgggcaagttgtgtttggctacatgtttatctcat	vvi-miR169f	CAGCCAAGGATGACTTGCCGA	5'	Diff	gp2a	...((((((((((((((.(((..((((((..(.(((.(((((((((..(((((((((((((......((.....))....))))......)))))))))..))))))))).))).)..))))))..)))))))))))))))))...	140	47.9	-79.6	1.1	38	83	80	47	59.5	72	39.1304	71.4645	85.848	60.9608	59.1959	56.7557	middle
34	48	csn-miR169b-3p_L+1R-1_2ss13CA16C-	CGGCAAGTTGTCATTGGCTAC	21	Sc0000878	-	87999	88144	aagagggtcttacttgaagaggtagagagtttgaTGCAGCCAAGGATGACTTGCCggcccaacagcaccagtgtgggagatgggtactttcCGGCAAGTTGTCTTTGGCTACatgagtctctctttctctcaagtaagaccttaat	130	vvi-MIR169g,vvi-MIR169a,vvi-MIR169f,vvi-MIR169k,vvi-MIR169j,vvi-MIR169s,vvi-MIR169w,vvi-MIR169m,vvi-MIR169n,vvi-MIR169p,vvi-MIR169q,vvi-MIR169c,vvi-MIR169e,vvi-MIR169d,mtr-MIR169g,mtr-MIR169a,mtr-MIR169b,mtr-MIR169l,mtr-MIR169d,mtr-MIR169e,gma-MIR169b,gma-MIR169f,gma-MIR169g,gma-MIR169u,gma-MIR169v,gma-MIR169a,gma-MIR169m,gma-MIR169s,gma-MIR169h,gma-MIR169e,gma-MIR169d,ptc-MIR169h,ptc-MIR169g,ptc…	ath-MIR169b	cccaacggagtagaattgcatgaagtggagtagagtataatgCAGCCAAGGATGACTTGCCGGaacgttgttaaccatgcatatgaataatgtgatgattaattatgtgatgaacatatttctGGCAAGTTGTCCTTCGGCTACAttttgctctcttcttctcatgcaaactttccttggg	ath-miR169b-3p	GGCAAGTTGTCCTTCGGCTACA	3'	Diff	gp2a	...((((((((((((((.(((..((((((..(.(((.(((((((((..(((((((((((((......((.....))....))))......)))))))))..))))))))).))).)..))))))..)))))))))))))))))...	140	47.9	-79.6	1.1	562.5	739	453.5	702.5	1111	1381.5	579.233	636.293	486.651	911.17	1105.32	1089	middle
35	49	csn-miR169x	TAGCCAAGGATGACTTGCCTA	21	Sc0002639	-	194144	194334	gagagagaagaaaagtggccttacatgaaggggtagagtgtagagtttggTAGCCAAGGATGACTTGCCTActcccacacaagggttgagagatggatcacttggtaatttttattcagcccttgttcgattcttAGGCAGTCACCTTGGCTAATCtgactggctcttctctctcatgctaggctttctct	42	vvi-MIR169x,vvi-MIR169e,vvi-MIR169g,ptc-MIR169r,ptc-MIR169v,stu-MIR169e,stu-MIR169h,stu-MIR169g,ppe-MIR169g,mes-MIR169ab,mes-MIR169ac,lus-MIR169l,bna-MIR169e,bna-MIR169f,bna-MIR169c,bna-MIR169d,tcc-MIR169d,tcc-MIR169c,sly-MIR169d,aqc-MIR169a,ssl-MIR169,atr-MIR169a,atr-MIR169c,osa-MIR169f,osa-MIR169g,osa-MIR169c,bdi-MIR169h,bdi-MIR169n,bdi-MIR169c,sbi-MIR169n,sbi-MIR169c,sbi-MIR169m,sbi-MIR169d,sb…	vvi-MIR169x	gtctcgtctggTAGCCAAGGATGACTTGCCTAaatccaccaggtttcaaaacactgaatgtaattatccacaaagcgattccgtggtctttaggcagtcattccttcggctaaactgaccggctc	vvi-miR169x	TAGCCAAGGATGACTTGCCTA	5'	Yes	gp2a	...((((((.......(((((..(((((..(((.(((((....((((...(((((((((.((((.((((((.......((((((((((((((((..(((....))).)))))...)))))))))))........)))))))))))))))))))....)))).))))).)))..)))))..)))))))))))	188	46.1	-80.8	0.9	9	7	10	6	18	14.5	9.26772	6.02713	10.731	7.78224	17.908	11.43	middle
35	50	csn-miR169g-p3_1ss10CT	AGGCAGTCATCTTGGCTAATC	21	Sc0002639	-	194144	194334	gagagagaagaaaagtggccttacatgaaggggtagagtgtagagtttggTAGCCAAGGATGACTTGCCTActcccacacaagggttgagagatggatcacttggtaatttttattcagcccttgttcgattcttAGGCAGTCACCTTGGCTAATCtgactggctcttctctctcatgctaggctttctct	42	vvi-MIR169x,vvi-MIR169e,vvi-MIR169g,ptc-MIR169r,ptc-MIR169v,stu-MIR169e,stu-MIR169h,stu-MIR169g,ppe-MIR169g,mes-MIR169ab,mes-MIR169ac,lus-MIR169l,bna-MIR169e,bna-MIR169f,bna-MIR169c,bna-MIR169d,tcc-MIR169d,tcc-MIR169c,sly-MIR169d,aqc-MIR169a,ssl-MIR169,atr-MIR169a,atr-MIR169c,osa-MIR169f,osa-MIR169g,osa-MIR169c,bdi-MIR169h,bdi-MIR169n,bdi-MIR169c,sbi-MIR169n,sbi-MIR169c,sbi-MIR169m,sbi-MIR169d,sb…	ppe-MIR169g	gacaggaagggaggccttacatgaaggaaagagtcttgtttggTAGCCAAGGATGACTTGCCTGCctccagtttcatgagcttttacctataattaattaatctgcagcttcttcacattaatattgtgccaaattcctgttaggctgccaggcagtcaccttggctaatctcgcaggctcttctctttcatgctaggcctcttcttccttc	ppe-MIR169g-p3	aggcagtcaccttggctaatc	3'	New	gp2a	...((((((.......(((((..(((((..(((.(((((....((((...(((((((((.((((.((((((.......((((((((((((((((..(((....))).)))))...)))))))))))........)))))))))))))))))))....)))).))))).)))..)))))..)))))))))))	188	46.1	-80.8	0.9	11	12	8	0	5	0	11.3272	10.3322	8.5848	0	4.97444	0	middle
36	49	csn-miR169x	TAGCCAAGGATGACTTGCCTA	21	Sc0005907	+	10744	10926	gaggaagtgaggtcttgtatgcagatttagagtcttgtttggTAGCCAAGGATGACTTGCCTAaatccaattttagggttgcgacatatgtaagcatatgtatatagataatcacgtggtttttaggaagtcatctttggcttttctgacagattctaatccttcatgctagaccttcacttc	31	vvi-MIR169x,ptc-MIR169r,stu-MIR169e,stu-MIR169h,stu-MIR169g,mes-MIR169ab,mes-MIR169ac,bna-MIR169c,bna-MIR169d,bna-MIR169e,bna-MIR169f,tcc-MIR169d,sly-MIR169d,aqc-MIR169a,ssl-MIR169,atr-MIR169a,atr-MIR169c,osa-MIR169f,osa-MIR169g,bdi-MIR169h,bdi-MIR169n,sbi-MIR169c,sbi-MIR169m,sbi-MIR169d,sbi-MIR169h,sbi-MIR169n,zma-MIR169h,zma-MIR169g,zma-MIR169f,ata-MIR169c,far-MIR169,	vvi-MIR169x	gtctcgtctggTAGCCAAGGATGACTTGCCTAaatccaccaggtttcaaaacactgaatgtaattatccacaaagcgattccgtggtctttaggcagtcattccttcggctaaactgaccggctc	vvi-miR169x	TAGCCAAGGATGACTTGCCTA	5'	Yes	gp2a	...((((((((((((.(((((.((..((((((((.(((..((.(((((((((((((((.((((((.(((........(((...(((((((....))))))).....))).......)))..)))))))))))))))))))))..))..)))))))))))..)).))))).)))))).))))))	180	38.8	-80.8	1.1	9	7	10	6	18	14.5	9.26772	6.02713	10.731	7.78224	17.908	11.43	middle
37	51	csn-miR169i_R+1	TAGCCAAGGATGACTTGCCTGT	22	Sc0004003	-	150705	150880	gagagaggaagagaggtcttacatgaaggcaagagtcttgtttggTAGCCAAGGATGACTTGCCTGTagccacccattgatcattagtccttgttcgtttggttctctgcAGGCATTCATCTTGGCTAGtttgacagcctcttctctctcatgctagtcctcttcttccatctaga	23	ptc-MIR169k,ptc-MIR169x,ath-MIR169m,aly-MIR169k,aly-MIR169m,tcc-MIR169j,tcc-MIR169i,aqc-MIR169b,osa-MIR169j,osa-MIR169m,osa-MIR169l,osa-MIR169i,osa-MIR169h,osa-MIR169k,bdi-MIR169g,bdi-MIR169e,sbi-MIR169g,sbi-MIR169l,sbi-MIR169f,zma-MIR169i,zma-MIR169j,zma-MIR169k,ata-MIR169i,	ptc-MIR169k	tcttgtttggTAGCCAAGGATGACTTGCCTGtagcctccctcggattcatgaacacgagcatttatgtggtgctcaaaagaaaaggagagaatgatcccagctggcagcgacaaggtcaatccattgaagtagcgagaagcaggtgatttatagctagaatccacaagaggttcccagcaagtgtccttggctaacgagacgg	ptc-miR169i	TAGCCAAGGATGACTTGCCTG	5'	Diff	gp2a	...(((((((((((((.((..(((((((..(((((..(((((..((((((((.(((((..(((((((((..(((...(((.((........)).)))...)))...))))))))).)))))))))))).)..))))).)))))..)).)))))..)).))))).))))).)))...	170	46.6	-72.7	0.9	6	16	7	13	0	9	6.17848	13.7763	7.5117	16.8615	0	7.09447	middle
37	52	csn-miR169x-p3_2ss6AT19AG	AGGCATTCATCTTGGCTAG	19	Sc0004003	-	150705	150880	gagagaggaagagaggtcttacatgaaggcaagagtcttgtttggTAGCCAAGGATGACTTGCCTGTagccacccattgatcattagtccttgttcgtttggttctctgcAGGCATTCATCTTGGCTAGtttgacagcctcttctctctcatgctagtcctcttcttccatctaga	23	ptc-MIR169k,ptc-MIR169x,ath-MIR169m,aly-MIR169k,aly-MIR169m,tcc-MIR169j,tcc-MIR169i,aqc-MIR169b,osa-MIR169j,osa-MIR169m,osa-MIR169l,osa-MIR169i,osa-MIR169h,osa-MIR169k,bdi-MIR169g,bdi-MIR169e,sbi-MIR169g,sbi-MIR169l,sbi-MIR169f,zma-MIR169i,zma-MIR169j,zma-MIR169k,ata-MIR169i,	ptc-MIR169x	tgctgttttcTAGCCAAGGATGACTTGCTCGttagcccttgaaagatgtttcaaatttaggctgcatatgctcagaacctttttctggcttcaggcaatcatcttggctaaatgacag	ptc-MIR169x-p3	aggcaatcatcttggctaa	3'	New	gp2a	...(((((((((((((.((..(((((((..(((((..(((((..((((((((.(((((..(((((((((..(((...(((.((........)).)))...)))...))))))))).)))))))))))).)..))))).)))))..)).)))))..)).))))).))))).)))...	170	46.6	-72.7	0.9	0	0	0	0	8	0	0	0	0	0	7.95911	0	low
38	53	csn-miR169e_R-2_1ss13AG	TAGCCAAGGATGGCTTGCCT	20	xpSc0053608	+	125379	125561	gaggaagagaggccttacatgaagggcagagtgtagagtttggTAGCCAAGGATGGCTTGCCTaattccacacaagggttgagagattggatcattttgtattacttagcccttgtttggttctcagGCAGTCATCCTGGCTAACttgattggctcttctctttcatgttaggccttctcttc	128	vvi-MIR169e,vvi-MIR169x,vvi-MIR169b,vvi-MIR169h,mtr-MIR169f,ptc-MIR169i,ptc-MIR169m,ptc-MIR169k,ptc-MIR169r,ptc-MIR169j,ptc-MIR169l,ptc-MIR169o,ath-MIR169j,ath-MIR169h,ath-MIR169m,ath-MIR169i,ath-MIR169k,ath-MIR169l,ath-MIR169n,stu-MIR169e,stu-MIR169g,stu-MIR169d,stu-MIR169b,stu-MIR169f,stu-MIR169c,stu-MIR169h,stu-MIR169a,mdm-MIR169f,mdm-MIR169e,aly-MIR169l,aly-MIR169i,aly-MIR169j,aly-MIR169h,aly…	vvi-MIR169e	gtcttgtctgaTAGCCAAGGATGACTTGCCTGCcctatcccaagtgggtcaatttctttcttttttccaagtagtgtttgatatttgatatatcatgaatccggttgtttgggttccaggcagtcaccttggctaattttacaggctct	vvi-miR169e	TAGCCAAGGATGACTTGCCTGC	5'	Diff	gp2a	...((((((((((((.((((((((((.(((((...((((....(((((.((((((((.(((((....(((.((((((((((((..(((..(....)..).))..)))))))))))).))).....)))))))))))))))))))))).....))))).).))))))))).)))))).))))))	180	45.9	-89.5	1.1	52	175	106	166	138	167	53.5468	150.678	113.749	215.309	137.295	131.642	middle
38	54	csn-miR169f-p3_2ss11AT18AC	GCAGTCATCCTGGCTAAC	18	xpSc0053608	+	125379	125561	gaggaagagaggccttacatgaagggcagagtgtagagtttggTAGCCAAGGATGGCTTGCCTaattccacacaagggttgagagattggatcattttgtattacttagcccttgtttggttctcagGCAGTCATCCTGGCTAACttgattggctcttctctttcatgttaggccttctcttc	128	vvi-MIR169e,vvi-MIR169x,vvi-MIR169b,vvi-MIR169h,mtr-MIR169f,ptc-MIR169i,ptc-MIR169m,ptc-MIR169k,ptc-MIR169r,ptc-MIR169j,ptc-MIR169l,ptc-MIR169o,ath-MIR169j,ath-MIR169h,ath-MIR169m,ath-MIR169i,ath-MIR169k,ath-MIR169l,ath-MIR169n,stu-MIR169e,stu-MIR169g,stu-MIR169d,stu-MIR169b,stu-MIR169f,stu-MIR169c,stu-MIR169h,stu-MIR169a,mdm-MIR169f,mdm-MIR169e,aly-MIR169l,aly-MIR169i,aly-MIR169j,aly-MIR169h,aly…	ppe-MIR169f	gagaggaagggaggtctaacatgagagcaagagcctagtttggTAGCCAAGGATGACTTGCCTGCtctaccagagagatcaattctccattggtgtaactttgttggattggaagcttctgtttggccaggcagtcatccaggctaaactgacaggctcttcttcctcatgccaggccttcccttcttcc	ppe-MIR169f-p3	gcagtcatccaggctaaa	3'	New	gp2a	...((((((((((((.((((((((((.(((((...((((....(((((.((((((((.(((((....(((.((((((((((((..(((..(....)..).))..)))))))))))).))).....)))))))))))))))))))))).....))))).).))))))))).)))))).))))))	180	45.9	-89.5	1.1	0	3	0	0	0	0	0	2.58306	0	0	0	0	low
39	55	csn-miR169q_R-2	TAGCCAAGGACGACTTGCC	19	Sc0000230	+	955992	956133	gaagcaagttgattggctataaatagatctttgaaactaagtattggtatccaattggagcatgaaaatatgagtactaaaggaagagaggccttacatgaagataagagtcttgtttggTAGCCAAGGACGACTTGCCttg	11	ptc-MIR169ae,ptc-MIR169q,ptc-MIR169u,ptc-MIR169af,ptc-MIR169ad,ptc-MIR169ac,stu-MIR169f,nta-MIR169t,sly-MIR169e,cca-MIR169a,atr-MIR169b,	ptc-MIR169q	tcttgttagtTAGCCAAGGACGACTTGCCTGttcctagcaatttgggatttgccctggactaagaggcaggaccctcattccgggtttcaggcagtctccttggctaggttgaca	ptc-miR169q	TAGCCAAGGACGACTTGCCTG	3'	Diff	gp2a	...((((((((.((((((((.......((((((..(((..(((((....(((....))).......))))).)))..))))))....(((((((((........)))).))))).....))))))))...))))))))....	135	38	-35.9	0.7	0	3	0	8	14	41	0	2.58306	0	10.3763	13.9284	32.3192	middle
40	56	csn-miR169r-5p_R+1_2ss10AT21GA	TAGCCAAGGTTGATTTGCCTAT	22	Sc0000365	-	200918	201094	agagaggaagagagggcttacatgaagttaagagtcatgtgtttgaTAGCCAAGGTTGATTTGCCTATaccaaaccgaggtgtctttggtattggaaccctcgtttggttcctaggcaacgactttggctagtctaactaactcttctctcccatgctagcccttctcttcttcatt	7	osa-MIR169r,bdi-MIR169k,sbi-MIR169o,ata-MIR169b,ata-MIR169a,ata-MIR169j,tae-MIR169,	osa-MIR169r	aggccatcttcgaTAGCCAAGGATGATTTGCCTGtagccccattgtcatcagctctctccgtcgagagcgacaaccgggctctacTGGCAAGTCTCCTCGGCTACCcgagtacctcttatgctatccca	osa-miR169r-5p	TAGCCAAGGATGATTTGCCTG	5'	Diff	gp2a	...(((((((((((((((..((((.((..((((((.....(((.((((((((((((((..(((((((.(((((((.((((..(((........)))..)))))))))))...))))))))))))))))))).)).)))..))))))..))..))))..)))))).)))))))))...	171	44.6	-83.7	1.1	17	15	17	20	27	49	17.5057	12.9153	18.2427	25.9408	26.862	38.6254	middle
41	57	csn-miR169b	TAGCCAAGGATGATTTGCCTGC	22	Sc0001497	+	227904	228079	agaggaagaagagagatcttacatgaaggcaagagtctagtttggTAGCCAAGGATGATTTGCCTGCagccatcttttgtttgatcatcagagcttgcttgtttggttctctgcaggcagtcatcttggttagtttgacagcctcttctctttcatgctagtccttttcttccatg	1	mdm-MIR169b,	mdm-MIR169b	ggaagagatgtcaaacatggaagaaggagccttgtttggTAGCCAAGGATGATTTGCCTGCagcctcgatcctaaagagtaaagaggtttattacacgataaaaatcagaaaaaccctagttgagttctcaggcagtcacgccttggcgacgtgacaagctcttctctctcatgctaggctgctctcttcc	mdm-miR169b	TAGCCAAGGATGATTTGCCTGC	5'	Yes	gp2a	...((((((((((.((.((..((((((((.(((((.((.(((..((((((((.(((((.((((((((((..(((........)))....((((((.........)))))))))))))))))))))))))))).)..))))).)))))..))))))))..))))))))))))))...	170	43.8	-70.6	0.9	4.5	13.5	6.5	1.5	2	3.5	4.63386	11.6237	6.97515	1.94556	1.98978	2.75896	middle
42	57	csn-miR169b	TAGCCAAGGATGATTTGCCTGC	22	Sc0001985	-	69894	70072	tggggaggaagggaggtcttacgcgaaggcaagagtctagtttggTAGCCAAGGATGATTTGCCTGCagccaccttttgtttgatcctcagagcttgcttgtttggttctctgcaggcagtcatcttggttagtttgatagcctcttatctctcatgctactccttctcttcttccata	1	mdm-MIR169b,	mdm-MIR169b	ggaagagatgtcaaacatggaagaaggagccttgtttggTAGCCAAGGATGATTTGCCTGCagcctcgatcctaaagagtaaagaggtttattacacgataaaaatcagaaaaaccctagttgagttctcaggcagtcacgccttggcgacgtgacaagctcttctctctcatgctaggctgctctcttcc	mdm-miR169b	TAGCCAAGGATGATTTGCCTGC	5'	Yes	gp2a	...(((((((((((((...((.(((.((..(((((.(((......((((((((.((((((.((((((((..(((....((....((....))....))......)))...))))))))))))))))))))))......))).)))))..))....)))))...)))))))))))))...	173	47.5	-66	0.8	4.5	13.5	6.5	1.5	2	3.5	4.63386	11.6237	6.97515	1.94556	1.98978	2.75896	middle
43	58	csn-miR171j-5p_2ss8CT9TC	TATTGGCTCGGTTCACTCAGA	21	Sc0000571	+	418373	418519	tcctgaaatagtcactgcgaTATTGGCTCGGTTCACTCAGAcaaatgcatcataaaaagggaaaaaaattgaaaatgttgatgttaacattttattatttttttgaattTGATTGAGCCGTGCCAATATCTcagtgccatttcatct	49	vvi-MIR171a,vvi-MIR171i,mtr-MIR171d,mtr-MIR171c,gma-MIR171j,gma-MIR171g,gma-MIR171d,ptc-MIR171e,ptc-MIR171f,ptc-MIR171i,ptc-MIR171g,ptc-MIR171h,ppe-MIR171f,nta-MIR171c,mes-MIR171g,mes-MIR171h,mes-MIR171j,mes-MIR171i,mes-MIR171k,lus-MIR171e,lus-MIR171b,lus-MIR171c,cme-MIR171f,tcc-MIR171h,tcc-MIR171e,sly-MIR171a,rco-MIR171c,rco-MIR171f,rco-MIR171d,rco-MIR171e,lja-MIR171a,aqc-MIR171a,aqc-MIR171b,aqc…	gma-MIR171j	atgaagtagttattgtgaTATTGGCCTGGTTCACTCAGAcatgtataccacggcacggttgtgtccttgctagaaagatttaaaacaaaatacatgttgtgattgtggttttgggttTGATTGAGCCGTGCCAATATCtcagtgctatttcat	gma-miR171j-5p	TATTGGCCTGGTTCACTCAGA	5'	Diff	gp2a	...((((((.(.(((((.(((((((((.(((((((.(((((...(((...)))........((((((((..(((((((((....)))))))))...))))))))...))))).))))))).))))))))).)))))).))))))...	141	33.3	-52.1	1.1	223	378.5	211	0	3	9	229.634	325.895	226.424	0	2.98467	7.09447	middle
43	59	csn-miR171a_R+1	TGATTGAGCCGTGCCAATATCT	22	Sc0000571	+	418373	418519	tcctgaaatagtcactgcgaTATTGGCTCGGTTCACTCAGAcaaatgcatcataaaaagggaaaaaaattgaaaatgttgatgttaacattttattatttttttgaattTGATTGAGCCGTGCCAATATCTcagtgccatttcatct	49	vvi-MIR171a,vvi-MIR171i,mtr-MIR171d,mtr-MIR171c,gma-MIR171j,gma-MIR171g,gma-MIR171d,ptc-MIR171e,ptc-MIR171f,ptc-MIR171i,ptc-MIR171g,ptc-MIR171h,ppe-MIR171f,nta-MIR171c,mes-MIR171g,mes-MIR171h,mes-MIR171j,mes-MIR171i,mes-MIR171k,lus-MIR171e,lus-MIR171b,lus-MIR171c,cme-MIR171f,tcc-MIR171h,tcc-MIR171e,sly-MIR171a,rco-MIR171c,rco-MIR171f,rco-MIR171d,rco-MIR171e,lja-MIR171a,aqc-MIR171a,aqc-MIR171b,aqc…	vvi-MIR171i	gaagaaggtggggatgttggaatggctcaatcaaatcaaatctcccaagggttttgggtcctttaatcTGATTGAGCCGTGCCAATATCatcatgttcacttc	vvi-miR171a	TGATTGAGCCGTGCCAATATC	3'	Diff	gp2a	...((((((.(.(((((.(((((((((.(((((((.(((((...(((...)))........((((((((..(((((((((....)))))))))...))))))))...))))).))))))).))))))))).)))))).))))))...	141	33.3	-52.1	1.1	46.5	36.5	18	1.5	3.5	5	47.8832	31.4272	19.3158	1.94556	3.48211	3.94137	middle
44	60	csn-miR171j-5p	TATTGGCCTGGTTCACTCAGA	21	Sc0001325	-	335750	335889	tatatgaaatggtaactctgaTATTGGCCTGGTTCACTCAGAcaaaaacacacttatccaaaaaaatatatatccatacttgatgtggtgagagttttgattTGATTGAGCCGTGCCAATATCtcagtttctttcattac	79	vvi-MIR171i,vvi-MIR171a,mtr-MIR171d,mtr-MIR171c,mtr-MIR171a,gma-MIR171g,gma-MIR171u,gma-MIR171e,gma-MIR171j,gma-MIR171a,gma-MIR171i,ptc-MIR171e,ptc-MIR171h,ptc-MIR171f,ptc-MIR171g,ptc-MIR171i,ath-MIR171a,ath-MIR170,ath-MIR171b,stu-MIR171c,stu-MIR171a,aly-MIR171a,aly-MIR170,aly-MIR171b,ppe-MIR171f,ppe-MIR171g,nta-MIR171c,mes-MIR171h,mes-MIR171k,mes-MIR171g,mes-MIR171j,mes-MIR171i,lus-MIR171e,lus-M…	gma-MIR171j	atgaagtagttattgtgaTATTGGCCTGGTTCACTCAGAcatgtataccacggcacggttgtgtccttgctagaaagatttaaaacaaaatacatgttgtgattgtggttttgggttTGATTGAGCCGTGCCAATATCtcagtgctatttcat	gma-miR171j-5p	TATTGGCCTGGTTCACTCAGA	5'	Yes	gp2a	...((((((.((.((((..(((((((((..((((((.(((((..(((((...((((((((...((.(((......))).))..)).)))))).)))))..))))).))))))..)))))))))..))))))))))))...	134	34.3	-42.3	0.9	217.5	468	277	7	12	14	223.97	402.957	297.249	9.07927	11.9387	11.0358	middle
44	61	csn-miR171a_1ss1TC	CGATTGAGCCGTGCCAATATC	21	Sc0001325	-	335750	335889	tatatgaaatggtaactctgaTATTGGCCTGGTTCACTCAGAcaaaaacacacttatccaaaaaaatatatatccatacttgatgtggtgagagttttgattTGATTGAGCCGTGCCAATATCtcagtttctttcattac	79	vvi-MIR171i,vvi-MIR171a,mtr-MIR171d,mtr-MIR171c,mtr-MIR171a,gma-MIR171g,gma-MIR171u,gma-MIR171e,gma-MIR171j,gma-MIR171a,gma-MIR171i,ptc-MIR171e,ptc-MIR171h,ptc-MIR171f,ptc-MIR171g,ptc-MIR171i,ath-MIR171a,ath-MIR170,ath-MIR171b,stu-MIR171c,stu-MIR171a,aly-MIR171a,aly-MIR170,aly-MIR171b,ppe-MIR171f,ppe-MIR171g,nta-MIR171c,mes-MIR171h,mes-MIR171k,mes-MIR171g,mes-MIR171j,mes-MIR171i,lus-MIR171e,lus-M…	vvi-MIR171a	tggtgggaagcgtgatgttgggacggctcaatcaaaccaaagatctcaatggttgagtcctttaatcTGATTGAGCCGTGCCAATATCatgttcaatac	vvi-miR171a	TGATTGAGCCGTGCCAATATC	3'	Diff	gp2a	...((((((.((.((((..(((((((((..((((((.(((((..(((((...((((((((...((.(((......))).))..)).)))))).)))))..))))).))))))..)))))))))..))))))))))))...	134	34.3	-42.3	0.9	270	272	282.5	27	18	11.5	278.032	234.197	303.151	35.0201	17.908	9.06515	middle
45	60	csn-miR171j-5p	TATTGGCCTGGTTCACTCAGA	21	Sc0004065	-	166032	166174	tatatgaaatagtgactttgaTATTGGCATGGTTCACTCAGAtaaaaacaaatatgtgtatatatatatatatatattatatgcatggcggtgaagttTTGATTTGATTGAGCCGCGCCaatatctgagttctctttcattac	20	mtr-MIR171d,gma-MIR171j,ptc-MIR171k,ptc-MIR171i,ath-MIR171a,ath-MIR170,stu-MIR171c,stu-MIR171a,aly-MIR171a,aly-MIR170,ppe-MIR171g,nta-MIR171c,mes-MIR171j,mes-MIR171i,bra-MIR171e,bna-MIR171f,bna-MIR171g,tcc-MIR171h,sly-MIR171a,rco-MIR171f,	gma-MIR171j	atgaagtagttattgtgaTATTGGCCTGGTTCACTCAGAcatgtataccacggcacggttgtgtccttgctagaaagatttaaaacaaaatacatgttgtgattgtggttttgggttTGATTGAGCCGTGCCAATATCtcagtgctatttcat	gma-miR171j-5p	TATTGGCCTGGTTCACTCAGA	5'	Yes	gp2a	...((((((.((.((((..(((((((((..((((((.((((((.(((((.((((((((((((....)))))))))))).....(((....)))..))))).)))))).))))))..)))))))))..)))))).))))))...	137	30.8	-50.4	1.1	217.5	468	277	7	12	14	223.97	402.957	297.249	9.07927	11.9387	11.0358	middle
45	62	csn-miR171i-p3	TTGATTTGATTGAGCCGTGCC	21	Sc0004065	-	166032	166174	tatatgaaatagtgactttgaTATTGGCATGGTTCACTCAGAtaaaaacaaatatgtgtatatatatatatatatattatatgcatggcggtgaagttTTGATTTGATTGAGCCGCGCCaatatctgagttctctttcattac	20	mtr-MIR171d,gma-MIR171j,ptc-MIR171k,ptc-MIR171i,ath-MIR171a,ath-MIR170,stu-MIR171c,stu-MIR171a,aly-MIR171a,aly-MIR170,ppe-MIR171g,nta-MIR171c,mes-MIR171j,mes-MIR171i,bra-MIR171e,bna-MIR171f,bna-MIR171g,tcc-MIR171h,sly-MIR171a,rco-MIR171f,	ptc-MIR171i	gagtgactatgatattggcctggttcactcagatcacgacttcagagcaaagtgtctttcttcttcttctttttcttcttcttcttgttttatgttcgtttgattTGATTGAGCCGTGCCAATATCtcagtactc	ptc-MIR171i-p3	ttgattTGATTGAGCCGTGCC	3'	New	gp2a	...((((((.((.((((..(((((((((..((((((.((((((.(((((.((((((((((((....)))))))))))).....(((....)))..))))).)))))).))))))..)))))))))..)))))).))))))...	137	30.8	-50.4	1.1	0	1.5	3	0	0	0	0	1.29153	3.2193	0	0	0	low
46	63	csn-miR171c-p5_1	GGATATTGGTGCGGTTCAATA	21	xfSc0000003	-	223210	223349	aatagtagtttgagtgttggacattagacgGGATATTGGTCCGGTTCAATAtgaaagagagtgttcaaaatattgggctctgcttttTGATTGAGCCGTGCCAATATCacgtggcactgttctcagtcttcactgctctc	34	vvi-MIR171c,mtr-MIR171c,mtr-MIR171a,gma-MIR171u,gma-MIR171e,ptc-MIR171e,ath-MIR171b,ath-MIR170,stu-MIR171c,aly-MIR171b,aly-MIR170,cme-MIR171c,cme-MIR171i,cme-MIR171b,bra-MIR171c,bna-MIR171c,bra-MIR171d,bna-MIR171b,bra-MIR171b,bna-MIR171a,rco-MIR171c,csi-MIR171a,smo-MIR171a,smo-MIR171b,ccl-MIR171,crt-MIR171,atr-MIR171b,bdi-MIR171b,zma-MIR171f,zma-MIR171c,ata-MIR171c,ata-MIR171b,tae-MIR171b,far-MIR…	vvi-MIR171c	tggtattacgggatattggtgcggttcaataagaaagcagtgctcgcaatctttttgagttctggttttTGATTGAGCCGTGCCAATATCacgtgtcattgct	vvi-MIR171c-p5	ggatattggtgcggttcaata	5'	New	gp2a	...((((((..((.((..(((((....(((.((((((((..(((((((((..((((((((((..((((....))))))))).)))))..)))))))))..)))))))).))).....))))).)).))...))))))...	134	42.9	-53.3	0.9	25.5	29	31.5	0	3	5.5	26.2586	24.9695	33.8027	0	2.98467	4.33551	middle
46	61	csn-miR171a_1ss1TC	CGATTGAGCCGTGCCAATATC	21	xfSc0000003	-	223210	223349	aatagtagtttgagtgttggacattagacgGGATATTGGTCCGGTTCAATAtgaaagagagtgttcaaaatattgggctctgcttttTGATTGAGCCGTGCCAATATCacgtggcactgttctcagtcttcactgctctc	34	vvi-MIR171c,mtr-MIR171c,mtr-MIR171a,gma-MIR171u,gma-MIR171e,ptc-MIR171e,ath-MIR171b,ath-MIR170,stu-MIR171c,aly-MIR171b,aly-MIR170,cme-MIR171c,cme-MIR171i,cme-MIR171b,bra-MIR171c,bna-MIR171c,bra-MIR171d,bna-MIR171b,bra-MIR171b,bna-MIR171a,rco-MIR171c,csi-MIR171a,smo-MIR171a,smo-MIR171b,ccl-MIR171,crt-MIR171,atr-MIR171b,bdi-MIR171b,zma-MIR171f,zma-MIR171c,ata-MIR171c,ata-MIR171b,tae-MIR171b,far-MIR…	vvi-MIR171c	tggtattacgggatattggtgcggttcaataagaaagcagtgctcgcaatctttttgagttctggttttTGATTGAGCCGTGCCAATATCacgtgtcattgct	vvi-miR171a	TGATTGAGCCGTGCCAATATC	3'	Diff	gp2a	...((((((..((.((..(((((....(((.((((((((..(((((((((..((((((((((..((((....))))))))).)))))..)))))))))..)))))))).))).....))))).)).))...))))))...	134	42.9	-53.3	0.9	270	272	282.5	27	18	11.5	278.032	234.197	303.151	35.0201	17.908	9.06515	middle
47	64	csn-miR171h-p5_2ss8GC21TC	AGGTATTCACGTGTCTCAATC	21	Sc0001818	-	387578	387667	agtagAGGTATTCACGTGTCTCAATCtaaaaacatggttagatgaatcaatagccatgtaatttgaTTGAGCCGCGTCAATATCTCTttt	22	vvi-MIR171b,mtr-MIR171b,gma-MIR171m,gma-MIR171t,gma-MIR171p,gma-MIR171n,stu-MIR171b,mdm-MIR171b,mdm-MIR171a,ppe-MIR171h,mes-MIR171a,lus-MIR171d,lus-MIR171g,lus-MIR171j,cme-MIR171h,sly-MIR171e,lja-MIR171b,ctr-MIR171,osa-MIR171i,sbi-MIR171h,zma-MIR171m,zma-MIR171l,	cme-MIR171h	tgaaggtattgacgtgtctcaatttgaaaggtacatggtttaatgtttgctaaaaaaattgggaaaattattaatttgtgttagggcttagccgtgtgtgttttcTGATTGAGCCGCGTCAATATCtcttctcaaa	cme-MIR171h-p5	aggtattgacgtgtctcaatt	5'	New	gp2a	...(((((((((.(((((.(((((((.....(((((((((..........))))))))).....))))))).))))).)))))))))...	84	35.6	-37.5	1.2	0	3	0	0	0	5	0	2.58306	0	0	0	3.94137	low
47	65	csn-miR171m_1ss21AT	TTGAGCCGCGTCAATATCTCT	21	Sc0001818	-	387578	387667	agtagAGGTATTCACGTGTCTCAATCtaaaaacatggttagatgaatcaatagccatgtaatttgaTTGAGCCGCGTCAATATCTCTttt	22	vvi-MIR171b,mtr-MIR171b,gma-MIR171m,gma-MIR171t,gma-MIR171p,gma-MIR171n,stu-MIR171b,mdm-MIR171b,mdm-MIR171a,ppe-MIR171h,mes-MIR171a,lus-MIR171d,lus-MIR171g,lus-MIR171j,cme-MIR171h,sly-MIR171e,lja-MIR171b,ctr-MIR171,osa-MIR171i,sbi-MIR171h,zma-MIR171m,zma-MIR171l,	gma-MIR171t	gaagtgctgtatgaagcacaaatcaaggtattggcgcgcctcaatttgaagtcatggttaacatgaaacaagccatgtagttttaaTTGAGCCGCGTCAATATCTCAtcttgcactt	gma-miR171m	TTGAGCCGCGTCAATATCTCA	3'	Diff	gp2a	...(((((((((.(((((.(((((((.....(((((((((..........))))))))).....))))))).))))).)))))))))...	84	35.6	-37.5	1.2	1121	1901	1160.5	413.5	549	757	1154.35	1636.8	1245.33	536.326	546.194	596.724	middle
48	66	csn-miR171a-p5_2ss23GC24CT	ATTGGTGCGGTTCAATTTGAAACT	24	Sc0003169	-	41312	41405	gtattacggaatATTGGTGCGGTTCAATTTGAAACTagtcctctaaatatagagatctattttttaaTTGAGCCGTGCCAATATCGCgtaactt	30	mtr-MIR171c,gma-MIR171i,gma-MIR171a,ptc-MIR171e,ath-MIR171c,ath-MIR171b,stu-MIR171d,aly-MIR171b,mes-MIR171g,mes-MIR171k,lus-MIR171i,cme-MIR171d,bra-MIR171c,bna-MIR171c,bra-MIR171b,bna-MIR171a,bra-MIR171d,bna-MIR171b,sly-MIR171b,rco-MIR171c,smo-MIR171a,smo-MIR171b,aqc-MIR171f,ssl-MIR171a,bdi-MIR171b,bdi-MIR171e,ata-MIR171b,ata-MIR171c,tae-MIR171b,far-MIR171,	ssl-MIR171a	cgagatattggtgcggttcaatttgaaagccgtgctcaataggcttagagctcggttatttgaTTGAGCCGTGCCAATATCACG	ssl-MIR171a-p5	attggtgcggttcaatttgaaagc	5'	New	gp2a	...(((((..(((((((..((((((((((..(((.(((..(((((....)))))..))).)))..))))))))))..)))))))..)))))...	88	35.1	-41.5	1.3	4	0	0	0	0	0	4.11899	0	0	0	0	0	low
48	67	csn-miR171e-p3	TTGAGCCGTGCCAATATCGC	20	Sc0003169	-	41312	41405	gtattacggaatATTGGTGCGGTTCAATTTGAAACTagtcctctaaatatagagatctattttttaaTTGAGCCGTGCCAATATCGCgtaactt	30	mtr-MIR171c,gma-MIR171i,gma-MIR171a,ptc-MIR171e,ath-MIR171c,ath-MIR171b,stu-MIR171d,aly-MIR171b,mes-MIR171g,mes-MIR171k,lus-MIR171i,cme-MIR171d,bra-MIR171c,bna-MIR171c,bra-MIR171b,bna-MIR171a,bra-MIR171d,bna-MIR171b,sly-MIR171b,rco-MIR171c,smo-MIR171a,smo-MIR171b,aqc-MIR171f,ssl-MIR171a,bdi-MIR171b,bdi-MIR171e,ata-MIR171b,ata-MIR171c,tae-MIR171b,far-MIR171,	ptc-MIR171e	gtggaaatttgatgttggcagagctcaatcaaatcaaagcactcaatggttgggttctttcatcTGATTGAGCCGTGCCAATATCgcattaaat	ptc-MIR171e-p3	TTGAGCCGTGCCAATATCgc	3'	New	gp2a	...(((((..(((((((..((((((((((..(((.(((..(((((....)))))..))).)))..))))))))))..)))))))..)))))...	88	35.1	-41.5	1.3	30	43.5	26.5	10	18	44.5	30.8924	37.4543	28.4372	12.9704	17.908	35.0782	middle
49	68	csn-miR171c-5p_1ss5AG	AGATGTTGGTGCGGTTCAATC	21	Sc0003510	+	219475	219576	gtaacaatacgAGATGTTGGTGCGGTTCAATCtgaaagtagtactctaagaataggagttctatttttTAATTGAGCCGTGCCAATATCacgtgcttgtcca	17	vvi-MIR171h,mtr-MIR171f,gma-MIR171c,gma-MIR171q,ptc-MIR171b,ath-MIR171c,stu-MIR171d,aly-MIR171c,mes-MIR171c,mes-MIR171b,lus-MIR171d,bna-MIR171d,bol-MIR171a,tcc-MIR171d,sly-MIR171b,rco-MIR171b,aqc-MIR171f,	gma-MIR171q	tgagaacttgAGATATTGGTGCGGTTCAATCagaaggcagtgttttatgatccaaaaactctgtgttatttgaTTGAGCCGTGCCAATATCACAtgtaattcatctcgg	gma-miR171c-5p	AGATATTGGTGCGGTTCAATC	5'	Diff	gp2a	...((((((((.((((((((..(((((((((..((((((((.(((((.......))))).))))))))..)))))))))..)))))))).)))).))))...	96	39.2	-49.9	1.2	32	31	11	3	0	0	32.9519	26.6916	11.8041	3.89112	0	0	middle
49	69	csn-miR171d_1ss2GA	TAATTGAGCCGTGCCAATATC	21	Sc0003510	+	219475	219576	gtaacaatacgAGATGTTGGTGCGGTTCAATCtgaaagtagtactctaagaataggagttctatttttTAATTGAGCCGTGCCAATATCacgtgcttgtcca	17	vvi-MIR171h,mtr-MIR171f,gma-MIR171c,gma-MIR171q,ptc-MIR171b,ath-MIR171c,stu-MIR171d,aly-MIR171c,mes-MIR171c,mes-MIR171b,lus-MIR171d,bna-MIR171d,bol-MIR171a,tcc-MIR171d,sly-MIR171b,rco-MIR171b,aqc-MIR171f,	mtr-MIR171f	gatgagatattggtgcggttcaatcagaaggcagtgcttttataattcaaaaagctctgtgttattTGATTGAGCCGTGCCAATATCacgtgtta	mtr-miR171d	TGATTGAGCCGTGCCAATATC	3'	Diff	gp2a	...((((((((.((((((((..(((((((((..((((((((.(((((.......))))).))))))))..)))))))))..)))))))).)))).))))...	96	39.2	-49.9	1.2	2	0	0	0	0	0	2.05949	0	0	0	0	0	low
50	70	csn-miR171a-p3	AGATTGAGCCGTGCCAATATC	21	Sc0000517	-	714014	714114	aaaagaaagcgatgttggtgaggttcaatccgaagacggatttacgcttgtggttgtaaatgaggatctcAGATTGAGCCGCGCCAATATCactttttaca	1	smo-MIR171a,	smo-MIR171a	cgagcgagagcgatattggctctgctcaatcgcatgacgctgctgcatcgcacgaaaaatttgcgatgggaatggatcgatggagtcgcagcagaggcatgagaTTGAGCCGTGCCAATATCACTggtgtttttc	smo-MIR171a-p3	agaTTGAGCCGTGCCAATATC	3'	New	gp2a	...((((((.((((((((((.(((((((((.((.((...((((((((.....).))))))).....)))).))))))))).)))))))))).))))))...	95	42.6	-38.9	0.9	29.5	34	108	10.5	0	0	30.3775	29.2746	115.895	13.6189	0	0	middle
51	70	csn-miR171a-p3	AGATTGAGCCGTGCCAATATC	21	Sc0001871	-	77700	77804	aaaagaaagcgatgttggtgaggttcaatccgaagacggatttacgcatgtgtttgactgtaaaaggcgatctcAGATTGAGCCGCGCCAATATCactttctaca	1	smo-MIR171a,	smo-MIR171a	cgagcgagagcgatattggctctgctcaatcgcatgacgctgctgcatcgcacgaaaaatttgcgatgggaatggatcgatggagtcgcagcagaggcatgagaTTGAGCCGTGCCAATATCACTggtgtttttc	smo-MIR171a-p3	agaTTGAGCCGTGCCAATATC	3'	New	gp2a	...((((((.((((((((((.(((((((((.((.((((..((((((((......))..))))))...)).)))).))))))))).)))))))))).))))))...	99	43.8	-42.5	0.9	29.5	34	108	10.5	0	0	30.3775	29.2746	115.895	13.6189	0	0	middle
52	71	csn-miR171c-p5_2	TATTGGTGCGGTTCAATAAGA	21	Sc0002271	+	57783	57872	tgaacgggaTATTGGTGCGGTTCAATAAGAaagtagtgctcaaaatattgggctctcctttttgattgagccgtgccaatatcacgtaaa	5	vvi-MIR171c,cme-MIR171b,csi-MIR171a,ccl-MIR171,crt-MIR171,	vvi-MIR171c	tggtattacgggatattggtgcggttcaataagaaagcagtgctcgcaatctttttgagttctggttttTGATTGAGCCGTGCCAATATCacgtgtcattgct	vvi-MIR171c-p5	tattggtgcggttcaataaga	5'	New	gp2a	...(((.((((((((..(((((((((.((((((.((.((((((....)))))).)).)))))).)))))))))..)))))))).)))...	84	41.1	-47.2	1.3	25.5	29	31.5	0	3	5.5	26.2586	24.9695	33.8027	0	2.98467	4.33551	middle
53	72	csn-miR171g	CGAGCCGAATCAATATCACTC	21	Sc0002548	-	43748	43856	atttatggagaagtagacatggcgtgatgttggtccggctcatttctttcttgttaaaagttttgagaCGAGCCGAATCAATATCACTCttgtacacttctttatgcaa	12	mtr-MIR171g,mtr-MIR171h,gma-MIR171h,gma-MIR171b,ptc-MIR171l,ptc-MIR171j,ptc-MIR171m,ppe-MIR171d,ghr-MIR479,lja-MIR171c,csi-MIR479,csi-MIR171b,	mtr-MIR171h	aagtagacaggagtggtgttgtttctgctcatcttattaaataatgaatgaatgaatgacatttgcttacttataagaCGAGCCGAATCAATATCACTCcagtacacct	mtr-miR171g	CGAGCCGAATCAATATCACTC	3'	Yes	gp2a	...(((..((((((..(((.((.(((((((((((.((((((.((((...(((.....)))....)))).)))))).))))))))))).)))))..))))))..)))...	103	38.5	-44.4	1.1	84	58	80	21	35	18	86.4988	49.9391	85.848	27.2378	34.8211	14.1889	middle
54	73	csn-miR171m	TTGAGCCGCGTCAATATCTCA	21	Sc0004286	+	74883	74986	tatgcagtgaagatattgacgtgtttcaatctaaaaacatggttagatcgagtcttattagccatgtaattcgaTTGAGCCGCGTCAATATCTCActttgcgcc	22	vvi-MIR171b,mtr-MIR171b,gma-MIR171m,gma-MIR171t,gma-MIR171p,gma-MIR171n,stu-MIR171b,mdm-MIR171b,mdm-MIR171a,ppe-MIR171h,mes-MIR171a,lus-MIR171d,lus-MIR171g,lus-MIR171j,cme-MIR171h,sly-MIR171e,lja-MIR171b,ctr-MIR171,osa-MIR171i,sbi-MIR171h,zma-MIR171m,zma-MIR171l,	gma-MIR171t	gaagtgctgtatgaagcacaaatcaaggtattggcgcgcctcaatttgaagtcatggttaacatgaaacaagccatgtagttttaaTTGAGCCGCGTCAATATCTCAtcttgcactt	gma-miR171m	TTGAGCCGCGTCAATATCTCA	3'	Yes	gp2a	...((((((.(((((((((((((..((((((.((..((((((((((...........))))))))))..)).))))))..)))))))))))))))))..))...	98	39.4	-43.1	1.1	63	130	94.5	8.5	13	31	64.8741	111.932	101.408	11.0248	12.9335	24.4365	middle
55	74	csn-miR172c-5p_L+1R-1_2ss3TC4AG	TGCGGCATCATCAAGATTCAC	21	Sc0001132	-	412780	412893	tcattgtttgcagaTGCGGCATCATCAAGATTCACatgcaaatgaacagcagatttatactctgccgaatttgaaagatgAGAATCTTGATGATGCTGCATcagcaatcaacga	146	vvi-MIR172d,vvi-MIR172c,mtr-MIR172c,mtr-MIR172b,mtr-MIR172d,gma-MIR172b,gma-MIR172f,gma-MIR172a,gma-MIR172h,gma-MIR172g,gma-MIR172j,gma-MIR172i,gma-MIR172k,gma-MIR172l,gma-MIR172d,gma-MIR172c,gma-MIR172e,ptc-MIR172b,ptc-MIR172f,ptc-MIR172a,ptc-MIR172d,ptc-MIR172c,ptc-MIR172e,ptc-MIR172g,ath-MIR172a,ath-MIR172c,ath-MIR172b,ath-MIR172d,ath-MIR172e,gra-MIR172b,gra-MIR172a,stu-MIR172a,stu-MIR172b,stu…	mtr-MIR172c	tatttgcagatGTAGCATCATCAAGATTCACAtatgaaagtgcaaatggttttgttggattttgatctgatcgatgcaaatctaagttctccataggtcttttgaactgAGAATCTTGATGATGCTGCATcagccataa	mtr-miR172c-5p	GTAGCATCATCAAGATTCACA	5'	Diff	gp2a	((.(((.((((.(((((((((((((((((((((.(((.(((((.....(((((.......)))))...)))))....))).))))))))))))))))))))).)))).))).))	114	39.5	-52.4	1.2	923.5	595.5	495.5	480.5	573.5	971	950.971	512.736	531.721	623.227	570.568	765.414	middle
55	75	csn-miR172d_L-2	AGAATCTTGATGATGCTGCAT	21	Sc0001132	-	412780	412893	tcattgtttgcagaTGCGGCATCATCAAGATTCACatgcaaatgaacagcagatttatactctgccgaatttgaaagatgAGAATCTTGATGATGCTGCATcagcaatcaacga	146	vvi-MIR172d,vvi-MIR172c,mtr-MIR172c,mtr-MIR172b,mtr-MIR172d,gma-MIR172b,gma-MIR172f,gma-MIR172a,gma-MIR172h,gma-MIR172g,gma-MIR172j,gma-MIR172i,gma-MIR172k,gma-MIR172l,gma-MIR172d,gma-MIR172c,gma-MIR172e,ptc-MIR172b,ptc-MIR172f,ptc-MIR172a,ptc-MIR172d,ptc-MIR172c,ptc-MIR172e,ptc-MIR172g,ath-MIR172a,ath-MIR172c,ath-MIR172b,ath-MIR172d,ath-MIR172e,gra-MIR172b,gra-MIR172a,stu-MIR172a,stu-MIR172b,stu…	vvi-MIR172d	gttagctgatgcagcatcatcaagattcacacccaatggaagggcagtgatgcaatctctgccaaagattttgagaTGAGAATCTTGATGATGCTGCATtcgcagtgaa	vvi-miR172d	TGAGAATCTTGATGATGCTGCAT	3'	Diff	gp2a	((.(((.((((.(((((((((((((((((((((.(((.(((((.....(((((.......)))))...)))))....))).))))))))))))))))))))).)))).))).))	114	39.5	-52.4	1.2	2308	2274	1530.5	884	1225	1443.5	2376.66	1957.96	1642.38	1146.58	1218.74	1137.87	high
56	74	csn-miR172c-5p_L+1R-1_2ss3TC4AG	TGCGGCATCATCAAGATTCAC	21	Sc0002575	-	326498	326626	aagagtcattgttttcaggTGCGGCATCATTAAGATTCACatgcaaatgtgttgatgatatatagtatcgtcagctgaagtttgaaggtgAGAATCTTGATGATGCTGCATCtggaattgatgactatg	130	vvi-MIR172d,mtr-MIR172b,mtr-MIR172c,mtr-MIR172d,gma-MIR172b,gma-MIR172l,gma-MIR172h,gma-MIR172i,gma-MIR172g,gma-MIR172f,gma-MIR172k,gma-MIR172j,gma-MIR172a,ptc-MIR172b,ptc-MIR172f,ptc-MIR172a,ptc-MIR172c,ptc-MIR172e,ptc-MIR172d,ath-MIR172a,ath-MIR172e,ath-MIR172b,ath-MIR172c,ath-MIR172d,gra-MIR172a,gra-MIR172b,stu-MIR172c,stu-MIR172b,stu-MIR172a,stu-MIR172e,mdm-MIR172e,mdm-MIR172b,mdm-MIR172o,mdm…	mtr-MIR172c	tatttgcagatGTAGCATCATCAAGATTCACAtatgaaagtgcaaatggttttgttggattttgatctgatcgatgcaaatctaagttctccataggtcttttgaactgAGAATCTTGATGATGCTGCATcagccataa	mtr-miR172c-5p	GTAGCATCATCAAGATTCACA	5'	Diff	gp2a	...(((((((..((((((((((((((((((((((((((((...(((((..(((((((((((...)))))))))))....)))))...))))..))))))))))))))))))))))))..)))))))...	123	38	-67.6	1.4	923.5	595.5	495.5	480.5	573.5	971	950.971	512.736	531.721	623.227	570.568	765.414	middle
56	76	csn-miR172d_L-2R+1	AGAATCTTGATGATGCTGCATT	22	Sc0002575	-	326498	326626	aagagtcattgttttcaggTGCGGCATCATTAAGATTCACatgcaaatgtgttgatgatatatagtatcgtcagctgaagtttgaaggtgAGAATCTTGATGATGCTGCATCtggaattgatgactatg	130	vvi-MIR172d,mtr-MIR172b,mtr-MIR172c,mtr-MIR172d,gma-MIR172b,gma-MIR172l,gma-MIR172h,gma-MIR172i,gma-MIR172g,gma-MIR172f,gma-MIR172k,gma-MIR172j,gma-MIR172a,ptc-MIR172b,ptc-MIR172f,ptc-MIR172a,ptc-MIR172c,ptc-MIR172e,ptc-MIR172d,ath-MIR172a,ath-MIR172e,ath-MIR172b,ath-MIR172c,ath-MIR172d,gra-MIR172a,gra-MIR172b,stu-MIR172c,stu-MIR172b,stu-MIR172a,stu-MIR172e,mdm-MIR172e,mdm-MIR172b,mdm-MIR172o,mdm…	vvi-MIR172d	gttagctgatgcagcatcatcaagattcacacccaatggaagggcagtgatgcaatctctgccaaagattttgagaTGAGAATCTTGATGATGCTGCATtcgcagtgaa	vvi-miR172d	TGAGAATCTTGATGATGCTGCAT	3'	Diff	gp2a	...(((((((..((((((((((((((((((((((((((((...(((((..(((((((((((...)))))))))))....)))))...))))..))))))))))))))))))))))))..)))))))...	123	38	-67.6	1.4	132.5	132.5	99	62	72.5	94	136.441	114.085	106.237	80.4164	72.1294	74.0978	middle
57	77	csn-miR172c-5p	GTAGCATCATCAAGATTCACA	21	xfSc0004202	+	1629	1773	gacagtcgttgtttgcgggtGTAGCATCATCAAGATTCACAtgcaaatccacgcggcggtgatgtaatttctctctctttctctttgccagaggtttttgaaggtgAGAATCTTGATGATGCTGCATcggcaataaacgactacc	125	vvi-MIR172d,mtr-MIR172b,mtr-MIR172c,mtr-MIR172d,gma-MIR172b,gma-MIR172h,gma-MIR172g,gma-MIR172f,gma-MIR172j,gma-MIR172a,gma-MIR172l,gma-MIR172i,gma-MIR172k,ptc-MIR172b,ptc-MIR172f,ptc-MIR172a,ptc-MIR172d,ptc-MIR172c,ptc-MIR172e,ath-MIR172a,ath-MIR172b,ath-MIR172c,ath-MIR172d,ath-MIR172e,gra-MIR172b,gra-MIR172a,stu-MIR172b,stu-MIR172a,stu-MIR172e,stu-MIR172c,mdm-MIR172e,mdm-MIR172b,mdm-MIR172o,mdm…	mtr-MIR172c	tatttgcagatGTAGCATCATCAAGATTCACAtatgaaagtgcaaatggttttgttggattttgatctgatcgatgcaaatctaagttctccataggtcttttgaactgAGAATCTTGATGATGCTGCATcagccataa	mtr-miR172c-5p	GTAGCATCATCAAGATTCACA	5'	Yes	gp2a	...(((((((..((((.((((((((((((((((((.((((.(((...........))))))).........((((.(((((.....(((...)))....))))).)))).)))))))))))))))))).))))..)))))))...	139	45.5	-62.4	0.9	167.5	127.5	129	66.5	128	150	172.483	109.78	138.43	86.2531	127.346	118.241	middle
57	75	csn-miR172d_L-2	AGAATCTTGATGATGCTGCAT	21	xfSc0004202	+	1629	1773	gacagtcgttgtttgcgggtGTAGCATCATCAAGATTCACAtgcaaatccacgcggcggtgatgtaatttctctctctttctctttgccagaggtttttgaaggtgAGAATCTTGATGATGCTGCATcggcaataaacgactacc	125	vvi-MIR172d,mtr-MIR172b,mtr-MIR172c,mtr-MIR172d,gma-MIR172b,gma-MIR172h,gma-MIR172g,gma-MIR172f,gma-MIR172j,gma-MIR172a,gma-MIR172l,gma-MIR172i,gma-MIR172k,ptc-MIR172b,ptc-MIR172f,ptc-MIR172a,ptc-MIR172d,ptc-MIR172c,ptc-MIR172e,ath-MIR172a,ath-MIR172b,ath-MIR172c,ath-MIR172d,ath-MIR172e,gra-MIR172b,gra-MIR172a,stu-MIR172b,stu-MIR172a,stu-MIR172e,stu-MIR172c,mdm-MIR172e,mdm-MIR172b,mdm-MIR172o,mdm…	vvi-MIR172d	gttagctgatgcagcatcatcaagattcacacccaatggaagggcagtgatgcaatctctgccaaagattttgagaTGAGAATCTTGATGATGCTGCATtcgcagtgaa	vvi-miR172d	TGAGAATCTTGATGATGCTGCAT	3'	Diff	gp2a	...(((((((..((((.((((((((((((((((((.((((.(((...........))))))).........((((.(((((.....(((...)))....))))).)))).)))))))))))))))))).))))..)))))))...	139	45.5	-62.4	0.9	2308	2274	1530.5	884	1225	1443.5	2376.66	1957.96	1642.38	1146.58	1218.74	1137.87	high
58	77	csn-miR172c-5p	GTAGCATCATCAAGATTCACA	21	xfSc0041688	-	321	475	cgtcgtttgctggtGTAGCATCATCAAGATTCACAttcaaatgcacggtggtcgttagtggtgtgatatgatattgtaatcaatctctctctctctctctctgcaagagctttttgaagatgagaaTCTTGATGATGCTGCATCGGCaataaacg	124	vvi-MIR172d,mtr-MIR172b,mtr-MIR172c,mtr-MIR172d,gma-MIR172h,gma-MIR172g,gma-MIR172j,gma-MIR172b,gma-MIR172f,gma-MIR172a,gma-MIR172l,gma-MIR172i,gma-MIR172k,ptc-MIR172a,ptc-MIR172c,ptc-MIR172b,ptc-MIR172f,ptc-MIR172d,ptc-MIR172e,ath-MIR172b,ath-MIR172a,ath-MIR172c,ath-MIR172d,ath-MIR172e,gra-MIR172b,gra-MIR172a,stu-MIR172b,stu-MIR172a,stu-MIR172e,mdm-MIR172e,mdm-MIR172d,mdm-MIR172f,mdm-MIR172g,mdm…	mtr-MIR172c	tatttgcagatGTAGCATCATCAAGATTCACAtatgaaagtgcaaatggttttgttggattttgatctgatcgatgcaaatctaagttctccataggtcttttgaactgAGAATCTTGATGATGCTGCATcagccataa	mtr-miR172c-5p	GTAGCATCATCAAGATTCACA	5'	Yes	gp2a	(((...((((((((((((((((((((((((((.((((((((.((...(..(.....((.((...(((.((((......)))))))...))..))......)..)....))..)))))..))).))))))))))))))))))))))))))...)))	155	41.9	-58.1	0.9	167.5	127.5	129	66.5	128	150	172.483	109.78	138.43	86.2531	127.346	118.241	middle
58	78	csn-miR172b-p3	TCTTGATGATGCTGCATCGGC	21	xfSc0041688	-	321	475	cgtcgtttgctggtGTAGCATCATCAAGATTCACAttcaaatgcacggtggtcgttagtggtgtgatatgatattgtaatcaatctctctctctctctctctgcaagagctttttgaagatgagaaTCTTGATGATGCTGCATCGGCaataaacg	124	vvi-MIR172d,mtr-MIR172b,mtr-MIR172c,mtr-MIR172d,gma-MIR172h,gma-MIR172g,gma-MIR172j,gma-MIR172b,gma-MIR172f,gma-MIR172a,gma-MIR172l,gma-MIR172i,gma-MIR172k,ptc-MIR172a,ptc-MIR172c,ptc-MIR172b,ptc-MIR172f,ptc-MIR172d,ptc-MIR172e,ath-MIR172b,ath-MIR172a,ath-MIR172c,ath-MIR172d,ath-MIR172e,gra-MIR172b,gra-MIR172a,stu-MIR172b,stu-MIR172a,stu-MIR172e,mdm-MIR172e,mdm-MIR172d,mdm-MIR172f,mdm-MIR172g,mdm…	ptc-MIR172b	ttgtttgcgggtGGAGCATCATCAAGATTCACAtgcaaatgcacggccggtgatgttaagagttaaatctttctttgtttctgttcatctgccaaagttctttggaagtgAGAATCTTGATGATGCTGCATcggcaataa	ptc-MIR172b-p3	TCTTGATGATGCTGCATcggc	3'	New	gp2a	(((...((((((((((((((((((((((((((.((((((((.((...(..(.....((.((...(((.((((......)))))))...))..))......)..)....))..)))))..))).))))))))))))))))))))))))))...)))	155	41.9	-58.1	0.9	125.5	134	124	55.5	85	94	129.233	115.376	133.064	71.9857	84.5655	74.0978	middle
59	79	csn-miR172k	TGAATCTTGATGATGCTGCAT	21	Sc0001132	+	412844	412963	tagtcgttgattgctgatgcagcatcatcaagattctcatctttcaaattcggcagagtataaatctgctgttcatttgcatgTGAATCTTGATGATGCCGCATctgcaaacaatgactc	1	gma-MIR172k,	gma-MIR172k	ttgtttgcggatgtagcaccatcaagattcacatgcaaatgaaggtgggtgggactatgatgcaatctaagtgctctgccaatccattggtattttttggtggTGAATCTTGATGATGCTGCATcagccataaa	gma-miR172k	TGAATCTTGATGATGCTGCAT	3'	Yes	gp2a	.((((((((.((((.(((((.(((((((((((((((.(((....(((((.(((((((.......)))))))...))))).))).))))))))))))))).))))).)))).)))))))).	118	40	-62.3	1.3	3	4.5	10.5	5	0	0	3.08924	3.87458	11.2676	6.4852	0	0	middle
60	80	csn-miR172c-p5	CAGATGCGGCATCATCAAGAT	21	Sc0002575	+	326428	326556	catagtcatcaattcCAGATGCAGCATCATCAAGATtctcaccttcaaacttcagctgacgatactatatatcatcaacacatttgcatgtgaatcttaatgatgccgcacctgaaaacaatgactctt	1	tcc-MIR172c,	tcc-MIR172c	caatctgtcagtgtttgcagatgcggcatcatcaagattcacaaactttagtaagggcttcttttggaggccggggagtggtaaccaatcacctcctttactcgaaagttacctttcaaatgGGAATCTTGATGATGCTGCAtcagcaaacatattggctatt	tcc-MIR172c-p5	cagatgcggcatcatcaagat	5'	New	gp2a	...((((((......(((.(((.(((((((.(((((((.((....((((.......(((.((((.....)))).))).....))))..)).))))))).))))))).))).)))......))))))...	123	38	-35.2	0.7	3.5	2	1.5	9	8.5	10	3.60411	1.72204	1.60965	11.6734	8.45655	7.88274	middle
61	81	csn-miR319g_L+1R-2	ATTGGACTGAAGGGAGCTCC	20	Sc0003201	-	77318	77377	tgtgggagcaactccttccgtctacttcgcccgcatATTGGACTGAAGGGAGCTCCcggt	17	vvi-MIR319g,ptc-MIR319e,ptc-MIR319b,ptc-MIR319h,ath-MIR319a,stu-MIR319b,aly-MIR319a,ppe-MIR319a,mes-MIR319f,mes-MIR319a,cme-MIR319d,cme-MIR159b,cpa-MIR319,rco-MIR319d,osa-MIR159d,osa-MIR159e,osa-MIR159c,	vvi-MIR319g	gaacagctgaagagctccttttagtccaataaagagggctgaggggcggccagagctgccatctcatgcacttggctatgcttattcttttctcaatcaattcggttcgagtatggctgtggagtgacaaatgctaagtttagcctgatgcatgacatgggagcaactcctccgcacgctttgcccactcaTTGGACTGAAGGGAGCTCCCAgggcagatct	vvi-miR319g	TTGGACTGAAGGGAGCTCCCA	3'	Diff	gp2a	..(((((((...((((((.(((((..............))))).)))))).)))))))..	56	58.3	-23.6	0.7	0	7	4	7	3	8	0	6.02713	4.2924	9.07927	2.98467	6.30619	low
62	82	csn-miR390_1ss5TC	AAGCCCAGGAGGGATAGCGCC	21	Sc0000110	-	445357	445475	aaaaagtacagaagaatctataAAGCTCAGGAGGGATAGCGCCatggaatggtgatgatttttttcatcctctctATAGCGCTATCTATCCTGAGTttcatggctttttcatgcttgtg	70	vvi-MIR390,mtr-MIR390,gma-MIR390g,gma-MIR390a,gma-MIR390f,gma-MIR390e,gma-MIR390c,gma-MIR390d,gma-MIR390b,ptc-MIR390a,ptc-MIR390b,ptc-MIR390d,ptc-MIR390c,ath-MIR390b,ath-MIR390a,ppt-MIR390b,ppt-MIR390a,ppt-MIR390c,stu-MIR390,mdm-MIR390e,mdm-MIR390f,mdm-MIR390c,mdm-MIR390d,mdm-MIR390b,mdm-MIR390a,aly-MIR390b,aly-MIR390a,ppe-MIR390,nta-MIR390b,nta-MIR390c,nta-MIR390a,mes-MIR390,lus-MIR390b,lus-MIR3…	vvi-MIR390	agaatctgttAAGCTCAGGAGGGATAGCGCCatgagccatgatgaaaatgattgttgagttgaaaattttttctagcttgttttttgggtcatcattttgtgtgtgtggcgctatctatcctgagtttcacgggttcttc	vvi-miR390	AAGCTCAGGAGGGATAGCGCC	5'	Diff	gp2a	...(((((..((((((.((((.((((((((((..((((((((.(((((..((.(((((......))))))).))))).))))))))..)))))))))).)))).)))))).)))))...	113	39.5	-53.4	1.1	54	116	62	6.5	10.5	4.5	55.6063	99.8781	66.5322	8.43076	10.4463	3.54723	middle
62	83	csn-miR390b-p3_1ss12CT	ATAGCGCTATCTATCCTGAGT	21	Sc0000110	-	445357	445475	aaaaagtacagaagaatctataAAGCTCAGGAGGGATAGCGCCatggaatggtgatgatttttttcatcctctctATAGCGCTATCTATCCTGAGTttcatggctttttcatgcttgtg	70	vvi-MIR390,mtr-MIR390,gma-MIR390g,gma-MIR390a,gma-MIR390f,gma-MIR390e,gma-MIR390c,gma-MIR390d,gma-MIR390b,ptc-MIR390a,ptc-MIR390b,ptc-MIR390d,ptc-MIR390c,ath-MIR390b,ath-MIR390a,ppt-MIR390b,ppt-MIR390a,ppt-MIR390c,stu-MIR390,mdm-MIR390e,mdm-MIR390f,mdm-MIR390c,mdm-MIR390d,mdm-MIR390b,mdm-MIR390a,aly-MIR390b,aly-MIR390a,ppe-MIR390,nta-MIR390b,nta-MIR390c,nta-MIR390a,mes-MIR390,lus-MIR390b,lus-MIR3…	mdm-MIR390b	gtgtggaagaatctgttAAGCTCAGGAGGGATAGCGCCattctcggtttggtttaaccacatatagcgctatccatcctgagtttcatggcttcttcttacac	mdm-MIR390b-p3	atagcgctatccatcctgagt	3'	New	gp2a	...(((((..((((((.((((.((((((((((..((((((((.(((((..((.(((((......))))))).))))).))))))))..)))))))))).)))).)))))).)))))...	113	39.5	-53.4	1.1	40	29.5	34	12.5	12	9	41.1899	25.4	36.4854	16.213	11.9387	7.09447	middle
63	84	csn-miR390	AAGCTCAGGAGGGATAGCGCC	21	Sc0002275	+	108486	108661	tatatcagaaaacatacagtatgggaggatctgtgAAGCTCAGGAGGGATAGCGCCatggacaatgactatgattgttgttctaaggctttgtttggtcgtgttttaatttttatgtcaatcactactggCGCTATCTATCCTGAGTTTCAcgggttcttcttactatctctggtc	70	vvi-MIR390,mtr-MIR390,gma-MIR390g,gma-MIR390a,gma-MIR390f,gma-MIR390e,gma-MIR390c,gma-MIR390d,gma-MIR390b,ptc-MIR390a,ptc-MIR390b,ptc-MIR390d,ptc-MIR390c,ath-MIR390b,ath-MIR390a,ppt-MIR390b,ppt-MIR390a,ppt-MIR390c,stu-MIR390,mdm-MIR390e,mdm-MIR390f,mdm-MIR390c,mdm-MIR390d,mdm-MIR390b,mdm-MIR390a,aly-MIR390b,aly-MIR390a,ppe-MIR390,nta-MIR390b,nta-MIR390c,nta-MIR390a,mes-MIR390,lus-MIR390b,lus-MIR3…	vvi-MIR390	agaatctgttAAGCTCAGGAGGGATAGCGCCatgagccatgatgaaaatgattgttgagttgaaaattttttctagcttgttttttgggtcatcattttgtgtgtgtggcgctatctatcctgagtttcacgggttcttc	vvi-miR390	AAGCTCAGGAGGGATAGCGCC	5'	Yes	gp2a	...((((((........((((.(((((((((((((((((((((((..(((((((((((((....((((.((((..((((......((((......))))......))))..))))))))....))).))))))))))..)))))))))))))))))))))))))))...)))))).	172	40.9	-76.5	1.1	805	1703	1027.5	157.5	112.5	187.5	828.946	1466.31	1102.61	204.284	111.925	147.801	middle
63	85	csn-miR390a-3p_R+1_1ss8CT	CGCTATCTATCCTGAGTTTCA	21	Sc0002275	+	108486	108661	tatatcagaaaacatacagtatgggaggatctgtgAAGCTCAGGAGGGATAGCGCCatggacaatgactatgattgttgttctaaggctttgtttggtcgtgttttaatttttatgtcaatcactactggCGCTATCTATCCTGAGTTTCAcgggttcttcttactatctctggtc	70	vvi-MIR390,mtr-MIR390,gma-MIR390g,gma-MIR390a,gma-MIR390f,gma-MIR390e,gma-MIR390c,gma-MIR390d,gma-MIR390b,ptc-MIR390a,ptc-MIR390b,ptc-MIR390d,ptc-MIR390c,ath-MIR390b,ath-MIR390a,ppt-MIR390b,ppt-MIR390a,ppt-MIR390c,stu-MIR390,mdm-MIR390e,mdm-MIR390f,mdm-MIR390c,mdm-MIR390d,mdm-MIR390b,mdm-MIR390a,aly-MIR390b,aly-MIR390a,ppe-MIR390,nta-MIR390b,nta-MIR390c,nta-MIR390a,mes-MIR390,lus-MIR390b,lus-MIR3…	gma-MIR390c	tgtaAAGCTCAGGAGGGATAGCGCCatggatgatctcttctccactcttgatcttctcttgCGCTATCCATCCTGAGTTTCatggcttct	gma-miR390a-3p	CGCTATCCATCCTGAGTTTC	3'	Diff	gp2a	...((((((........((((.(((((((((((((((((((((((..(((((((((((((....((((.((((..((((......((((......))))......))))..))))))))....))).))))))))))..)))))))))))))))))))))))))))...)))))).	172	40.9	-76.5	1.1	344	298	210.5	64.5	106.5	87	354.233	256.583	225.888	83.659	105.956	68.5799	middle
64	84	csn-miR390	AAGCTCAGGAGGGATAGCGCC	21	xpSc0053457	+	53794	53944	agaatctgtaAAGCTCAGGAGGGATAGCGCCatagacaatgatgatggtggtggtggtggtggtgtgtggtagttgttcttctaaggctttgtttggttgtggttttatttatgtctgtcagtggCGCTATCTATCCTGAGTTTCAcgggt	68	vvi-MIR390,mtr-MIR390,gma-MIR390g,gma-MIR390a,gma-MIR390f,gma-MIR390e,gma-MIR390c,gma-MIR390d,gma-MIR390b,ptc-MIR390a,ptc-MIR390b,ptc-MIR390d,ptc-MIR390c,ath-MIR390b,ath-MIR390a,ppt-MIR390b,ppt-MIR390a,ppt-MIR390c,stu-MIR390,mdm-MIR390e,mdm-MIR390f,mdm-MIR390c,mdm-MIR390d,mdm-MIR390b,mdm-MIR390a,aly-MIR390b,aly-MIR390a,ppe-MIR390,nta-MIR390b,nta-MIR390c,nta-MIR390a,mes-MIR390,lus-MIR390b,lus-MIR3…	vvi-MIR390	agaatctgttAAGCTCAGGAGGGATAGCGCCatgagccatgatgaaaatgattgttgagttgaaaattttttctagcttgttttttgggtcatcattttgtgtgtgtggcgctatctatcctgagtttcacgggttcttc	vvi-miR390	AAGCTCAGGAGGGATAGCGCC	5'	Yes	gp2a	...((((((.((((((((((..((((((((((((((((..(((((.......................((.......))..(((..(((......)))..)))..)))))..)))))....)))))))))))..)))))))))).))))))	148	45.7	-51	0.7	805	1703	1027.5	157.5	112.5	187.5	828.946	1466.31	1102.61	204.284	111.925	147.801	middle
64	85	csn-miR390a-3p_R+1_1ss8CT	CGCTATCTATCCTGAGTTTCA	21	xpSc0053457	+	53794	53944	agaatctgtaAAGCTCAGGAGGGATAGCGCCatagacaatgatgatggtggtggtggtggtggtgtgtggtagttgttcttctaaggctttgtttggttgtggttttatttatgtctgtcagtggCGCTATCTATCCTGAGTTTCAcgggt	68	vvi-MIR390,mtr-MIR390,gma-MIR390g,gma-MIR390a,gma-MIR390f,gma-MIR390e,gma-MIR390c,gma-MIR390d,gma-MIR390b,ptc-MIR390a,ptc-MIR390b,ptc-MIR390d,ptc-MIR390c,ath-MIR390b,ath-MIR390a,ppt-MIR390b,ppt-MIR390a,ppt-MIR390c,stu-MIR390,mdm-MIR390e,mdm-MIR390f,mdm-MIR390c,mdm-MIR390d,mdm-MIR390b,mdm-MIR390a,aly-MIR390b,aly-MIR390a,ppe-MIR390,nta-MIR390b,nta-MIR390c,nta-MIR390a,mes-MIR390,lus-MIR390b,lus-MIR3…	gma-MIR390c	tgtaAAGCTCAGGAGGGATAGCGCCatggatgatctcttctccactcttgatcttctcttgCGCTATCCATCCTGAGTTTCatggcttct	gma-miR390a-3p	CGCTATCCATCCTGAGTTTC	3'	Diff	gp2a	...((((((.((((((((((..((((((((((((((((..(((((.......................((.......))..(((..(((......)))..)))..)))))..)))))....)))))))))))..)))))))))).))))))	148	45.7	-51	0.7	344	298	210.5	64.5	106.5	87	354.233	256.583	225.888	83.659	105.956	68.5799	middle
65	86	csn-miR390-p3_2ss17TA19GA	CTATCCCTCCTGAGCTATATA	21	Sc0000110	+	445318	445405	gccatgaaactcaggatagatagcgctatagagaggatgaaaaaaatcatcaccattccatggcgCTATCCCTCCTGAGCTTTATAga	1	pde-MIR390,	pde-MIR390	taatggtataaagaaattatgAAGCCCAGGATGGATAGCGCCagccccacttgaaatttgcagtgggcgctatccctcctgagctttgtaattcc	pde-MIR390-p3	ctatccctcctgagctttgta	3'	New	gp2a	...(((((.(((((((..(((((((((((.(((..(((((......)))))....))).)))))))))))..))))))).)))))...	82	43.2	-38.8	1	17	30	17	0	0	0	17.5057	25.8306	18.2427	0	0	0	middle
66	87	csn-miR391-p5_2ss16CT20GA	ACGCAGGAGAGATGATGCCAA	21	xpSc0053699	-	148430	148549	cctgcattgaaaggttctctACGCAGGAGAGATGATGCCAAcatacatgccatttctagaatgagatggctggtgtgttggcatcattgctcctacgtagcaaacctttgcaagtgcgct	3	stu-MIR4376,mdm-MIR391,sly-MIR4376,	mdm-MIR391	gggaggttcgcTACGCAGGAGAGATGACGCCGacagtcatgttcttagtattaggattagaacgacggcgtcatctctcctgcataggaaaccttgc	mdm-MIR391-p5	ACGCAGGAGAGATGACGCCGa	5'	New	gp2a	...(((((((((((((..(((((.(((((..(((((((((((((((..((((((((......))))))))..)))))))))))))))..))))).)))))..))))))).))).)))...	114	47.5	-68.9	1.2	28	37	45	89	182	144	28.8329	31.8577	48.2895	115.436	181.07	113.511	middle
67	88	csn-miR393a	TCCAAAGGGATCGCATTGATC	21	Sc0000519	-	754139	754242	tgcaggtggagaacTCCAAAGGGATCGCATTGATCcaacgtttgattgatagcatggttttgttgattggataAATGCGATCCCTTGGGAATtttccatctata	62	vvi-MIR393b,vvi-MIR393a,mtr-MIR393a,mtr-MIR393b,gma-MIR393c,gma-MIR393e,gma-MIR393a,gma-MIR393i,gma-MIR393j,gma-MIR393h,gma-MIR393k,gma-MIR393d,gma-MIR393f,gma-MIR393g,ptc-MIR393a,ptc-MIR393c,ptc-MIR393b,ath-MIR393b,ath-MIR393a,stu-MIR393,mdm-MIR393a,mdm-MIR393f,mdm-MIR393b,mdm-MIR393c,mdm-MIR393d,mdm-MIR393e,aly-MIR393a,aly-MIR393b,ppe-MIR393a,ppe-MIR393b,mes-MIR393b,mes-MIR393c,mes-MIR393d,mes-…	vvi-MIR393a	ggtggacagtTCCAAAGGGATCGCATTGATCccatggttatcttccacctctcttaccagactatcataacaaagtctggcctttttcccattggatcatgctatcccttaggaactctccatcag	vvi-miR393a	TCCAAAGGGATCGCATTGATC	5'	Yes	gp2a	...((((((((((.(((.(((((((((((((.((((((...(..((.(((......)))..))..))))))).))))))))))))).))).))))))))))...	98	41.3	-47.6	1.1	402.5	544	469.5	111	117	160.5	414.473	468.394	503.821	143.971	116.402	126.518	middle
67	89	csn-miR393b-p3_2ss1GA19GT	AATGCGATCCCTTGGGAAT	19	Sc0000519	-	754139	754242	tgcaggtggagaacTCCAAAGGGATCGCATTGATCcaacgtttgattgatagcatggttttgttgattggataAATGCGATCCCTTGGGAATtttccatctata	62	vvi-MIR393b,vvi-MIR393a,mtr-MIR393a,mtr-MIR393b,gma-MIR393c,gma-MIR393e,gma-MIR393a,gma-MIR393i,gma-MIR393j,gma-MIR393h,gma-MIR393k,gma-MIR393d,gma-MIR393f,gma-MIR393g,ptc-MIR393a,ptc-MIR393c,ptc-MIR393b,ath-MIR393b,ath-MIR393a,stu-MIR393,mdm-MIR393a,mdm-MIR393f,mdm-MIR393b,mdm-MIR393c,mdm-MIR393d,mdm-MIR393e,aly-MIR393a,aly-MIR393b,ppe-MIR393a,ppe-MIR393b,mes-MIR393b,mes-MIR393c,mes-MIR393d,mes-…	ppe-MIR393b	ggtggaggctTCCAAAGGGATCGCATTGATCtaattaaccaaatcaacatggtgagtgtagatatttgatattggatcgatgcgatcccttgggaagtttctatc	ppe-MIR393b-p3	gatgcgatcccttgggaag	3'	New	gp2a	...((((((((((.(((.(((((((((((((.((((((...(..((.(((......)))..))..))))))).))))))))))))).))).))))))))))...	98	41.3	-47.6	1.1	19	22	43	3	12	11	19.5652	18.9424	46.1433	3.89112	11.9387	8.67102	middle
68	88	csn-miR393a	TCCAAAGGGATCGCATTGATC	21	Sc0002392	-	263164	263306	aactgaaggaggcaTCCAAAGGGATCGCATTGATCccaactctcttttttcataaactttattctttttttttctaagctttgtatataaatatacacagatgaatttggATCATGCTATCCCTTTGGATTtctccttcacta	63	vvi-MIR393b,vvi-MIR393a,mtr-MIR393a,mtr-MIR393b,gma-MIR393i,gma-MIR393c,gma-MIR393j,gma-MIR393h,gma-MIR393e,gma-MIR393a,gma-MIR393k,gma-MIR393d,gma-MIR393f,gma-MIR393g,gma-MIR393b,ptc-MIR393b,ptc-MIR393a,ptc-MIR393c,ath-MIR393b,ath-MIR393a,stu-MIR393,mdm-MIR393a,mdm-MIR393f,mdm-MIR393b,mdm-MIR393c,mdm-MIR393d,mdm-MIR393e,aly-MIR393a,aly-MIR393b,ppe-MIR393a,ppe-MIR393b,mes-MIR393c,mes-MIR393b,mes-…	vvi-MIR393a	ggtggacagtTCCAAAGGGATCGCATTGATCccatggttatcttccacctctcttaccagactatcataacaaagtctggcctttttcccattggatcatgctatcccttaggaactctccatcag	vvi-miR393a	TCCAAAGGGATCGCATTGATC	5'	Yes	gp2a	...((((((((..((((((((((((.((((.(((((.((.(((((..................(((.........)))...((((((....)))))).))).)).)).))))))))).))))))))))))..))))))))...	137	33.6	-50.1	1	402.5	544	469.5	111	117	160.5	414.473	468.394	503.821	143.971	116.402	126.518	middle
68	90	csn-miR393a-3p	ATCATGCTATCCCTTTGGATT	21	Sc0002392	-	263164	263306	aactgaaggaggcaTCCAAAGGGATCGCATTGATCccaactctcttttttcataaactttattctttttttttctaagctttgtatataaatatacacagatgaatttggATCATGCTATCCCTTTGGATTtctccttcacta	63	vvi-MIR393b,vvi-MIR393a,mtr-MIR393a,mtr-MIR393b,gma-MIR393i,gma-MIR393c,gma-MIR393j,gma-MIR393h,gma-MIR393e,gma-MIR393a,gma-MIR393k,gma-MIR393d,gma-MIR393f,gma-MIR393g,gma-MIR393b,ptc-MIR393b,ptc-MIR393a,ptc-MIR393c,ath-MIR393b,ath-MIR393a,stu-MIR393,mdm-MIR393a,mdm-MIR393f,mdm-MIR393b,mdm-MIR393c,mdm-MIR393d,mdm-MIR393e,aly-MIR393a,aly-MIR393b,ppe-MIR393a,ppe-MIR393b,mes-MIR393c,mes-MIR393b,mes-…	ptc-MIR393a	agaggaggcaTCCAAAGGGATCGCATTGATCccaagtgtctgtcccccataattttggATCATGCTATCCCTTTGGATTcctcct	ptc-miR393a-3p	ATCATGCTATCCCTTTGGATT	3'	Yes	gp2a	...((((((((..((((((((((((.((((.(((((.((.(((((..................(((.........)))...((((((....)))))).))).)).)).))))))))).))))))))))))..))))))))...	137	33.6	-50.1	1	63	118	85	15	55	35	64.8741	101.6	91.2135	19.4556	54.7189	27.5896	middle
69	91	csn-miR393a_1ss4AC	TCCCAAGGGATCGCATTGATC	21	Sc0000519	+	754083	754188	ctatagatggaaaatTCCCAAGGGATCGCATTTATCcaatcaacaaaaccatgctatcaatcaaacgttggatcaatgcgatccctttggagttctccacctgcat	62	vvi-MIR393b,vvi-MIR393a,mtr-MIR393a,mtr-MIR393b,gma-MIR393c,gma-MIR393e,gma-MIR393a,gma-MIR393i,gma-MIR393j,gma-MIR393h,gma-MIR393k,gma-MIR393d,gma-MIR393f,gma-MIR393g,ptc-MIR393a,ptc-MIR393c,ptc-MIR393b,ath-MIR393b,ath-MIR393a,stu-MIR393,mdm-MIR393a,mdm-MIR393f,mdm-MIR393b,mdm-MIR393c,mdm-MIR393d,mdm-MIR393e,aly-MIR393a,aly-MIR393b,ppe-MIR393a,ppe-MIR393b,mes-MIR393b,mes-MIR393c,mes-MIR393d,mes-…	vvi-MIR393a	ggtggacagtTCCAAAGGGATCGCATTGATCccatggttatcttccacctctcttaccagactatcataacaaagtctggcctttttcccattggatcatgctatcccttaggaactctccatcag	vvi-miR393a	TCCAAAGGGATCGCATTGATC	5'	Diff	gp2a	...(((.((((.((((((.(((((((((((((.(((((((..........................))))))).))))))))))))).)))))).)))).)))...	100	41.5	-43.2	1	3	5	1.5	0	0	0	3.08924	4.30509	1.60965	0	0	0	low
70	92	csn-miR394b	TTGGCATTCTGTCCACCTCC	20	Sc0002874	+	231506	231664	tctctttctagggtttctcatgagacttgttgcagagtcagtTTGGCATTCTGTCCACCTCCatcaaatgcggttatagaatgaattttgacctttggaggtggttaggatgccaaattagctctgtagagttctttatgagaaatcctcgtaaagtaa	50	vvi-MIR394b,vvi-MIR394a,vvi-MIR394c,gma-MIR394d,gma-MIR394f,gma-MIR394b,gma-MIR394e,gma-MIR394g,gma-MIR394a,gma-MIR394c,ptc-MIR394a,ptc-MIR394b,ath-MIR394b,ath-MIR394a,stu-MIR384,mdm-MIR394a,mdm-MIR394b,aly-MIR394b,aly-MIR394a,ppe-MIR394b,ppe-MIR394a,nta-MIR394,mes-MIR394c,mes-MIR394a,mes-MIR394b,lus-MIR394a,lus-MIR394b,cme-MIR394a,cme-MIR394b,bna-MIR394b,bna-MIR394a,tcc-MIR394b,tcc-MIR394a,cpa-M…	vvi-MIR394b	acagagtttaTTGGCATTCTGTCCACCTCCcatctcttgaaaatctctcttttctctctgtggaggtgggcatactgccaaccaagctctgtt	vvi-miR394b	TTGGCATTCTGTCCACCTCC	5'	Yes	gp2a	...((((..(((((((((((((((((((..(((((((..(((((((((((((..(((((((((........(((((............)))))..)))))))))..)))))))))))))..))))))))))))..))))))))))))))...))))...	153	40.3	-72.7	1.1	11725.5	23451	19166	2780	2495	3903	12074.3	20191.7	20567	3605.77	2482.25	3076.63	high
71	93	csn-miR394a_R-2	TTGGCATTCTGTCCACCTCC	20	xpSc0056769	+	6030	6191	tagggtttttcagaggccttattgcatagccactTTGGCATTCTGTCCACCTCCgtcaattgctgctaattaataccttgcagttgcatatgaattattatcattttcggaggcggtcagaatgtcaaaatagctctgtaaatctctctctgagaaacttgg	50	vvi-MIR394a,vvi-MIR394b,vvi-MIR394c,gma-MIR394g,gma-MIR394d,gma-MIR394f,gma-MIR394b,gma-MIR394e,gma-MIR394a,gma-MIR394c,ptc-MIR394a,ptc-MIR394b,ath-MIR394b,ath-MIR394a,stu-MIR384,mdm-MIR394b,mdm-MIR394a,aly-MIR394b,aly-MIR394a,ppe-MIR394a,ppe-MIR394b,nta-MIR394,mes-MIR394c,mes-MIR394a,mes-MIR394b,lus-MIR394b,lus-MIR394a,cme-MIR394a,cme-MIR394b,bna-MIR394b,bna-MIR394a,tcc-MIR394a,tcc-MIR394b,cpa-M…	vvi-MIR394c	cagagccattTTGGCATTCTGTCCACCTCCATatataccaattcttctgaattggcgcccacaagcgtttggaggcggccaggatgccaaattggctctgta	vvi-miR394a	TTGGCATTCTGTCCACCTCCAT	5'	Diff	gp2a	...(((((((((((((.....(((((.(((...((((((((((((.((.((((((.(((((((................)))))))...((((.......))))...)))))).)).))))))))))))...))).))))).....)))))))))))))...	156	40.7	-63.4	1	11725.5	23451	19166	2780	2495	3903	12074.3	20191.7	20567	3605.77	2482.25	3076.63	high
72	94	csn-miR395c-p5_1ss8CG	GTTCCCCGGAACACTTCATT	20	Sc0001334	+	297121	297266	cccctagaGTTCCCCGGAACACTTCATTgggacttttttaatatatcctcaactgagggtatggttgtaaagagccgttatatatccagatattgttattaaatttatgcatgatcttaCTGAAGTGTTTGGGGGAACTCtggttg	105	vvi-MIR395c,vvi-MIR395a,vvi-MIR395i,vvi-MIR395k,vvi-MIR395h,vvi-MIR395m,vvi-MIR395d,vvi-MIR395f,vvi-MIR395b,vvi-MIR395l,vvi-MIR395j,vvi-MIR395g,vvi-MIR395e,gma-MIR395c,gma-MIR395b,gma-MIR395a,ptc-MIR395c,ptc-MIR395k,ptc-MIR395f,ptc-MIR395g,ptc-MIR395h,ptc-MIR395i,ptc-MIR395e,ptc-MIR395b,ptc-MIR395d,ptc-MIR395j,ath-MIR395d,ath-MIR395a,ath-MIR395e,stu-MIR395g,stu-MIR395h,stu-MIR395i,stu-MIR395d,stu…	mdm-MIR395c	gaatcaggtgtcccctagagttcccccgaacacttcattaagatcgatgcataagttctttgtatattaaatgatgattgcaccatctctaCTGAAGTGTTTGGGGGAACTCcgggtgtcatttgatc	mdm-MIR395c-p5	gttcccccgaacacttcatt	5'	New	gp2a	...((((((((((((..(((((((((...((.((((((...(((((((((....))))))))).....))))))))...........((((..(((............)))..))))...)))))))))..))))))))))))...	140	39	-56.5	1	0	0	0	0	4	0	0	0	0	0	3.97955	0	low
72	95	csn-miR395a	CTGAAGTGTTTGGGGGAACTC	21	Sc0001334	+	297121	297266	cccctagaGTTCCCCGGAACACTTCATTgggacttttttaatatatcctcaactgagggtatggttgtaaagagccgttatatatccagatattgttattaaatttatgcatgatcttaCTGAAGTGTTTGGGGGAACTCtggttg	105	vvi-MIR395c,vvi-MIR395a,vvi-MIR395i,vvi-MIR395k,vvi-MIR395h,vvi-MIR395m,vvi-MIR395d,vvi-MIR395f,vvi-MIR395b,vvi-MIR395l,vvi-MIR395j,vvi-MIR395g,vvi-MIR395e,gma-MIR395c,gma-MIR395b,gma-MIR395a,ptc-MIR395c,ptc-MIR395k,ptc-MIR395f,ptc-MIR395g,ptc-MIR395h,ptc-MIR395i,ptc-MIR395e,ptc-MIR395b,ptc-MIR395d,ptc-MIR395j,ath-MIR395d,ath-MIR395a,ath-MIR395e,stu-MIR395g,stu-MIR395h,stu-MIR395i,stu-MIR395d,stu…	vvi-MIR395e	ctcccctagagttcccttgaccacttcactggggaccttctctaattataatgacttcctaCTGAAGTGTTTGGGGGAACTCctggtgccat	vvi-miR395a	CTGAAGTGTTTGGGGGAACTC	3'	Yes	gp2a	...((((((((((((..(((((((((...((.((((((...(((((((((....))))))))).....))))))))...........((((..(((............)))..))))...)))))))))..))))))))))))...	140	39	-56.5	1	6	21	17.5	1.5	3.5	3.5	6.17848	18.0814	18.7793	1.94556	3.48211	2.75896	middle
73	95	csn-miR395a	CTGAAGTGTTTGGGGGAACTC	21	Sc0002364	+	125753	125843	taaacatgtccccgagagttcccttgaacacttcattggggttcttgaatcttccCTGAAGTGTTTGGGGGAACTCttaggctcatgtgat	181	vvi-MIR395c,vvi-MIR395a,vvi-MIR395i,vvi-MIR395k,vvi-MIR395h,vvi-MIR395m,vvi-MIR395d,vvi-MIR395f,vvi-MIR395b,vvi-MIR395l,vvi-MIR395j,vvi-MIR395g,vvi-MIR395e,mtr-MIR395i,mtr-MIR395m,mtr-MIR395d,mtr-MIR395f,mtr-MIR395a,mtr-MIR395l,mtr-MIR395n,mtr-MIR395j,mtr-MIR395o,mtr-MIR395e,mtr-MIR395c,mtr-MIR395g,gma-MIR395c,gma-MIR395b,gma-MIR395a,gma-MIR395i,gma-MIR395m,gma-MIR395k,gma-MIR395l,gma-MIR395j,ptc…	vvi-MIR395e	ctcccctagagttcccttgaccacttcactggggaccttctctaattataatgacttcctaCTGAAGTGTTTGGGGGAACTCctggtgccat	vvi-miR395a	CTGAAGTGTTTGGGGGAACTC	3'	Yes	gp2a	...(((((..((..((((((((((..(((((((((..((((...........)))))))))))))..))))))))))..))..)))))...	85	46.2	-52.2	1.2	6	21	17.5	1.5	3.5	3.5	6.17848	18.0814	18.7793	1.94556	3.48211	2.75896	middle
74	96	csn-miR395d-5p_2ss5TC8CG	GTTCCCCGGAACACTTCATTG	21	Sc0003489	+	217233	217394	gaaggtcagttgtcccctagaGTTCCCCGGAACACTTCATTGggactttttgaatatatcctctactgcgggtgtggttgtaaagagccgtcatatatccagatattgtaattaaaattatgcatgatcctacTGAAGTGTTTGGGGGAACTCcggttgcca	181	vvi-MIR395c,vvi-MIR395a,vvi-MIR395i,vvi-MIR395k,vvi-MIR395h,vvi-MIR395m,vvi-MIR395d,vvi-MIR395f,vvi-MIR395b,vvi-MIR395l,vvi-MIR395j,vvi-MIR395g,vvi-MIR395e,mtr-MIR395i,mtr-MIR395m,mtr-MIR395d,mtr-MIR395f,mtr-MIR395a,mtr-MIR395l,mtr-MIR395n,mtr-MIR395j,mtr-MIR395o,mtr-MIR395e,mtr-MIR395c,mtr-MIR395g,gma-MIR395c,gma-MIR395i,gma-MIR395m,gma-MIR395b,gma-MIR395k,gma-MIR395l,gma-MIR395j,gma-MIR395a,ptc…	aly-MIR395d	acaaaatataattcgactagatgtcctctagaGTTCTCCCGAACACTTCATTGgaaatttgttattcggtaaactaccaattaattccaCTGAAGTGTTTGGGGGAACTCcggatgtcatttggtgatgtcaagccatgt	aly-miR395d-5p	GTTCTCCCGAACACTTCATTG	5'	Diff	gp2a	...((.(((..(.......(((((((((..(((((((((.((((((((((((..(((((((........)))))))....))))))).(((((((.......................)))).))).))))).)))))))))..))))))))))..))))).	158	43.8	-52.2	0.7	6	23	23	4	22	14	6.17848	19.8034	24.6813	5.18816	21.8875	11.0358	middle
74	97	csn-miR395a_L-1	TGAAGTGTTTGGGGGAACTC	20	Sc0003489	+	217233	217394	gaaggtcagttgtcccctagaGTTCCCCGGAACACTTCATTGggactttttgaatatatcctctactgcgggtgtggttgtaaagagccgtcatatatccagatattgtaattaaaattatgcatgatcctacTGAAGTGTTTGGGGGAACTCcggttgcca	181	vvi-MIR395c,vvi-MIR395a,vvi-MIR395i,vvi-MIR395k,vvi-MIR395h,vvi-MIR395m,vvi-MIR395d,vvi-MIR395f,vvi-MIR395b,vvi-MIR395l,vvi-MIR395j,vvi-MIR395g,vvi-MIR395e,mtr-MIR395i,mtr-MIR395m,mtr-MIR395d,mtr-MIR395f,mtr-MIR395a,mtr-MIR395l,mtr-MIR395n,mtr-MIR395j,mtr-MIR395o,mtr-MIR395e,mtr-MIR395c,mtr-MIR395g,gma-MIR395c,gma-MIR395i,gma-MIR395m,gma-MIR395b,gma-MIR395k,gma-MIR395l,gma-MIR395j,gma-MIR395a,ptc…	vvi-MIR395e	ctcccctagagttcccttgaccacttcactggggaccttctctaattataatgacttcctaCTGAAGTGTTTGGGGGAACTCctggtgccat	vvi-miR395a	CTGAAGTGTTTGGGGGAACTC	3'	Diff	gp2a	...((.(((..(.......(((((((((..(((((((((.((((((((((((..(((((((........)))))))....))))))).(((((((.......................)))).))).))))).)))))))))..))))))))))..))))).	158	43.8	-52.2	0.7	2	2	7.5	0	0	0	2.05949	1.72204	8.04825	0	0	0	low
75	98	csn-miR395c-p3_1ss21CT	TACTGAAGTGTTTGGGGGAAT	21	Sc0001326	-	511238	511356	aacatcacatgtcccctagagctcccctcaacacttcattggggctctttttttcctcaaaagaggtgaatgaattccTACTGAAGTGTTTGGGGGAACtcttgggctcatttgatact	90	vvi-MIR395c,vvi-MIR395a,vvi-MIR395i,vvi-MIR395k,vvi-MIR395h,vvi-MIR395m,vvi-MIR395d,vvi-MIR395b,vvi-MIR395l,vvi-MIR395j,vvi-MIR395g,vvi-MIR395e,vvi-MIR395f,gma-MIR395c,gma-MIR395b,gma-MIR395a,ptc-MIR395c,ptc-MIR395g,ptc-MIR395h,ptc-MIR395i,ptc-MIR395d,ptc-MIR395j,ptc-MIR395k,ptc-MIR395f,ptc-MIR395e,ptc-MIR395b,ath-MIR395e,ath-MIR395d,ath-MIR395a,stu-MIR395d,stu-MIR395j,stu-MIR395f,mdm-MIR395d,mdm…	vvi-MIR395c	gtcccctagagttcccttgaccacttcactggggaccttctctagttataatgacttcctaCTGAAGTGTTTGGGGGAACTCctggtgccat	vvi-MIR395c-p3	taCTGAAGTGTTTGGGGGAAC	3'	New	gp2a	...((((.(((..(((.((((.(((((..(((((((((.(((((.....(((..((((....)))).))).....))))).)))))))))..))))).)))).)))..))).))))...	113	44.5	-52	1	0	3	5.5	0	0	0	0	2.58306	5.90205	0	0	0	low
76	99	csn-miR395a_1ss19CT	CTGAAGTGTTTGGGGGAATTC	21	Sc0001583	-	487322	487419	accctggagttccctcttgcacttcagcgaggtttcttggagcctctttagttattggtaacttgtaatcaCTGAAGTGTTTGGGGGAACTCtggttg	109	vvi-MIR395c,vvi-MIR395a,vvi-MIR395i,vvi-MIR395k,vvi-MIR395l,vvi-MIR395h,vvi-MIR395m,vvi-MIR395j,vvi-MIR395g,vvi-MIR395d,vvi-MIR395f,vvi-MIR395b,vvi-MIR395e,gma-MIR395c,gma-MIR395a,gma-MIR395b,ptc-MIR395c,ptc-MIR395k,ptc-MIR395f,ptc-MIR395b,ptc-MIR395d,ptc-MIR395g,ptc-MIR395h,ptc-MIR395i,ptc-MIR395j,ptc-MIR395e,ath-MIR395d,ath-MIR395a,ath-MIR395e,stu-MIR395f,stu-MIR395g,stu-MIR395h,stu-MIR395i,stu…	vvi-MIR395e	ctcccctagagttcccttgaccacttcactggggaccttctctaattataatgacttcctaCTGAAGTGTTTGGGGGAACTCctggtgccat	vvi-miR395a	CTGAAGTGTTTGGGGGAACTC	3'	Diff	gp2a	...(..((((((((((..(((((((((.(((((((....)))))))...(((((....)))))........)))))))))..))))))))))..)...	92	46.9	-49	1.1	7	5.5	12	1.5	6	1.5	7.20823	4.7356	12.8772	1.94556	5.96933	1.18241	middle
77	99	csn-miR395a_1ss19CT	CTGAAGTGTTTGGGGGAATTC	21	Sc0002364	-	124381	124477	cccctagagtttcccggaacacttcactaggactcatttaagatcctcaagggtacttgccctagtcctgCTGAAGTGTTTGGGGGAACTCtagttg	112	vvi-MIR395c,vvi-MIR395a,vvi-MIR395i,vvi-MIR395k,vvi-MIR395h,vvi-MIR395m,vvi-MIR395d,vvi-MIR395f,vvi-MIR395b,vvi-MIR395l,vvi-MIR395j,vvi-MIR395g,vvi-MIR395e,mtr-MIR395h,gma-MIR395c,gma-MIR395b,gma-MIR395a,gma-MIR395g,gma-MIR395f,gma-MIR395d,gma-MIR395e,ptc-MIR395c,ptc-MIR395k,ptc-MIR395f,ptc-MIR395g,ptc-MIR395h,ptc-MIR395i,ptc-MIR395e,ptc-MIR395b,ptc-MIR395d,ptc-MIR395j,ath-MIR395d,ath-MIR395a,ath…	vvi-MIR395e	ctcccctagagttcccttgaccacttcactggggaccttctctaattataatgacttcctaCTGAAGTGTTTGGGGGAACTCctggtgccat	vvi-miR395a	CTGAAGTGTTTGGGGGAACTC	3'	Diff	gp2a	...((((((((((((..(((((((((..((((((....((((((((....)))).))))....))))))..)))))))))..))))))))))))...	91	49.5	-49.8	1	7	5.5	12	1.5	6	1.5	7.20823	4.7356	12.8772	1.94556	5.96933	1.18241	middle
78	100	csn-miR396b	TTCCACAGCTTTCTTGAACT	20	Sc0000948	+	652810	652984	tctgaggggataattaagagaattctgtgcaagtcctgccatgcttTTCCACAGCTTTCTTGAACTtccatatctattgttcttaattttgttttctagaaatagatcaactgtggaagCTCAAGAAAGCTGTGGGAAGacatggcagttcaggacttctttgccgccactctga	106	vvi-MIR396d,vvi-MIR396b,vvi-MIR396a,vvi-MIR396c,mtr-MIR396b,mtr-MIR396a,gma-MIR396c,gma-MIR396g,gma-MIR396b,gma-MIR396f,gma-MIR396i,gma-MIR396e,gma-MIR396d,gma-MIR396a,gma-MIR396h,gma-MIR396k,ptc-MIR396d,ptc-MIR396c,ptc-MIR396e,ptc-MIR396b,ptc-MIR396a,ath-MIR396b,ath-MIR396a,stu-MIR396,mdm-MIR396e,mdm-MIR396c,mdm-MIR396b,mdm-MIR396d,mdm-MIR396a,aly-MIR396b,aly-MIR396a,ppe-MIR396b,ppe-MIR396a,nta-…	vvi-MIR396c	ttctgtgatcTTCCACAGCTTTCTTGAACTgttttggaagccttccacttccatgcaatggaggagttcaaccaacagctcaggaaagttgtggaacattactgagag	vvi-miR396b	TTCCACAGCTTTCTTGAACT	5'	Yes	gp2a	((.(((.((.......(((((((((((........((((((((..((((((((((((((((((.((((((((...((((....)))).......((((....)))).....)))))))).))))))))))))))))))..))))))))..))))).))))))....)).))).))	175	41.1	-71.5	1	2427	2967.5	2572.5	434	557.5	523.5	2499.2	2555.07	2760.55	562.915	554.65	412.662	high
78	101	csn-miR396a-p3_1ss19GA	CTCAAGAAAGCTGTGGGAAG	20	Sc0000948	+	652810	652984	tctgaggggataattaagagaattctgtgcaagtcctgccatgcttTTCCACAGCTTTCTTGAACTtccatatctattgttcttaattttgttttctagaaatagatcaactgtggaagCTCAAGAAAGCTGTGGGAAGacatggcagttcaggacttctttgccgccactctga	106	vvi-MIR396d,vvi-MIR396b,vvi-MIR396a,vvi-MIR396c,mtr-MIR396b,mtr-MIR396a,gma-MIR396c,gma-MIR396g,gma-MIR396b,gma-MIR396f,gma-MIR396i,gma-MIR396e,gma-MIR396d,gma-MIR396a,gma-MIR396h,gma-MIR396k,ptc-MIR396d,ptc-MIR396c,ptc-MIR396e,ptc-MIR396b,ptc-MIR396a,ath-MIR396b,ath-MIR396a,stu-MIR396,mdm-MIR396e,mdm-MIR396c,mdm-MIR396b,mdm-MIR396d,mdm-MIR396a,aly-MIR396b,aly-MIR396a,ppe-MIR396b,ppe-MIR396a,nta-…	vvi-MIR396a	tcctgtcatgcttTTCCACAGCTTTCTTGAACTActtttccatctacctgtttgatgatcttcttcataaggagtgtgaaatagaagctcaagaaagctgtgggaggacatggcaa	vvi-MIR396a-p3	ctcaagaaagctgtgggagg	3'	New	gp2a	((.(((.((.......(((((((((((........((((((((..((((((((((((((((((.((((((((...((((....)))).......((((....)))).....)))))))).))))))))))))))))))..))))))))..))))).))))))....)).))).))	175	41.1	-71.5	1	335.5	451.5	308	25	30	20.5	345.48	388.75	330.515	32.426	29.8467	16.1596	middle
79	102	csn-miR396b_R+1_1ss2TC_2	TCCCACAGCTTTCTTGAACTT	21	Sc0000948	-	652753	652913	atcagagtggcggcaaagaagtcctgaactgccatgtctTCCCACAGCTTTCTTGAGCTTccacagttgatctatttctagaaaacaaaattaagaacaatagataTGGAAGTTCAAGAAAGCTGTGgaaaagcatggcaggacttgcacagaattctctt	55	vvi-MIR396b,mtr-MIR396a,gma-MIR396c,gma-MIR396g,gma-MIR396b,gma-MIR396f,gma-MIR396d,gma-MIR396k,ptc-MIR396e,ptc-MIR396d,ptc-MIR396c,ath-MIR396b,stu-MIR396,mdm-MIR396e,mdm-MIR396c,mdm-MIR396d,aly-MIR396b,ppe-MIR396b,nta-MIR396c,nta-MIR396b,mes-MIR396d,mes-MIR396e,mes-MIR396f,mes-MIR396c,lus-MIR396e,lus-MIR396b,cme-MIR396c,cme-MIR396a,cme-MIR396d,bra-MIR396,bna-MIR396a,tcc-MIR396c,tcc-MIR396e,sly-M…	vvi-MIR396b	tcctgccatgcttTTCCACAGCTTTCTTGAACTtcttctccctgtttggtggtctcctacgtttacccatccactgaagttcaagaaagctgtgggaaaccatggctt	vvi-miR396b	TTCCACAGCTTTCTTGAACT	5'	Diff	gp2a	...(((((....(((....(((((.....(((((((..((.((((((((((((((((((((((......((((((((((..(........)..)))..))))))).)))))))))))))))))))))).))..))))))))))))))).....)))))...	155	41	-66.8	1	42	36.5	38	7.5	7	10.5	43.2494	31.4272	40.7778	9.72779	6.96422	8.27688	middle
79	103	csn-miR396e-p3	TGGAAGCTCAAGAAAGCTGTG	21	Sc0000948	-	652753	652913	atcagagtggcggcaaagaagtcctgaactgccatgtctTCCCACAGCTTTCTTGAGCTTccacagttgatctatttctagaaaacaaaattaagaacaatagataTGGAAGTTCAAGAAAGCTGTGgaaaagcatggcaggacttgcacagaattctctt	55	vvi-MIR396b,mtr-MIR396a,gma-MIR396c,gma-MIR396g,gma-MIR396b,gma-MIR396f,gma-MIR396d,gma-MIR396k,ptc-MIR396e,ptc-MIR396d,ptc-MIR396c,ath-MIR396b,stu-MIR396,mdm-MIR396e,mdm-MIR396c,mdm-MIR396d,aly-MIR396b,ppe-MIR396b,nta-MIR396c,nta-MIR396b,mes-MIR396d,mes-MIR396e,mes-MIR396f,mes-MIR396c,lus-MIR396e,lus-MIR396b,cme-MIR396c,cme-MIR396a,cme-MIR396d,bra-MIR396,bna-MIR396a,tcc-MIR396c,tcc-MIR396e,sly-M…	ptc-MIR396e	ggtcatgcttTTCCACAGCTTTCTTGAACTTctttgccttgcttaatctgtgtatatatagatcactacatgtacagctcctatatatataaatatatgtatgtatagcgccatggaagCTCAAGAAAGCTGTGGGAGAacatgg	ptc-MIR396e-p3	tggaagCTCAAGAAAGCTGTG	3'	New	gp2a	...(((((....(((....(((((.....(((((((..((.((((((((((((((((((((((......((((((((((..(........)..)))..))))))).)))))))))))))))))))))).))..))))))))))))))).....)))))...	155	41	-66.8	1	8.5	14	11	0	1.5	0	8.75285	12.0543	11.8041	0	1.49233	0	middle
80	102	csn-miR396b_R+1_1ss2TC_2	TCCCACAGCTTTCTTGAACTT	21	xpSc0055518	-	6422	6562	gaatcaacttatgtttTCCCACAGCTTTCTTGAACCTagttttgaagctcatcatggctaataatgggtaatgacttgtatactagtcagtcagtgccatttttaagttcaagaaagctgtggaaaaatattagtcgaccc	54	vvi-MIR396b,mtr-MIR396a,gma-MIR396c,gma-MIR396g,gma-MIR396b,gma-MIR396f,gma-MIR396d,gma-MIR396k,ptc-MIR396d,ptc-MIR396c,ptc-MIR396e,ath-MIR396b,stu-MIR396,mdm-MIR396e,mdm-MIR396c,mdm-MIR396d,aly-MIR396b,ppe-MIR396b,nta-MIR396c,nta-MIR396b,mes-MIR396e,mes-MIR396d,mes-MIR396f,mes-MIR396c,lus-MIR396e,lus-MIR396b,cme-MIR396c,cme-MIR396a,cme-MIR396d,bra-MIR396,bna-MIR396a,tcc-MIR396c,tcc-MIR396e,sly-M…	vvi-MIR396b	tcctgccatgcttTTCCACAGCTTTCTTGAACTtcttctccctgtttggtggtctcctacgtttacccatccactgaagttcaagaaagctgtgggaaaccatggctt	vvi-miR396b	TTCCACAGCTTTCTTGAACT	5'	Diff	gp2a	...((.(((.(((((((.(((((((((((((((((.((((..(((......)))..))))......((((.(((((..(......)..))))).))))........))))))))))))))))).))))))).))).))...	135	36.9	-51.8	1	42	36.5	38	7.5	7	10.5	43.2494	31.4272	40.7778	9.72779	6.96422	8.27688	middle
81	104	csn-miR396b_R+1_1	TTCCACAGCTTTCTTGAACTG	21	Sc0000948	-	670022	670192	tttgtcgggtgtctacagatgatcctctttgtattcTTCCACAGCTTTCTTGAACTGcatccgatcgcatcatcctcactcttgcaaatttaggtatcaaaaggccattcaatcgttgcaGTTCAATAAAGCTGTGGGAAAatacggagagggtcaaaaatattcgatcgg	114	vvi-MIR396d,vvi-MIR396c,vvi-MIR396b,vvi-MIR396a,mtr-MIR396b,mtr-MIR396a,mtr-MIR396c,gma-MIR396i,gma-MIR396e,gma-MIR396a,gma-MIR396h,gma-MIR396c,gma-MIR396g,gma-MIR396b,gma-MIR396f,gma-MIR396d,gma-MIR396k,gma-MIR396j,ptc-MIR396b,ptc-MIR396a,ptc-MIR396d,ptc-MIR396c,ptc-MIR396e,ptc-MIR396f,ath-MIR396a,ath-MIR396b,stu-MIR396,mdm-MIR396b,mdm-MIR396c,mdm-MIR396d,mdm-MIR396e,mdm-MIR396g,mdm-MIR396f,mdm-…	vvi-MIR396b	tcctgccatgcttTTCCACAGCTTTCTTGAACTtcttctccctgtttggtggtctcctacgtttacccatccactgaagttcaagaaagctgtgggaaaccatggctt	vvi-miR396b	TTCCACAGCTTTCTTGAACT	5'	Diff	gp2a	...((((..(((.......(((((((((..(((((.((((((((((((.((((((((((..((((.(((.............))).......(((........))).....)))).)))))))))).)))))))))))).)))))..)))))))))...)))..))))...	165	42.1	-70.3	1	137956	127266	104924	26129	30397	32293	142059	109578	112593	33890.3	30241.6	25455.7	high
81	105	csn-miR396b-3p_1ss21GA	GTTCAATAAAGCTGTGGGAAA	21	Sc0000948	-	670022	670192	tttgtcgggtgtctacagatgatcctctttgtattcTTCCACAGCTTTCTTGAACTGcatccgatcgcatcatcctcactcttgcaaatttaggtatcaaaaggccattcaatcgttgcaGTTCAATAAAGCTGTGGGAAAatacggagagggtcaaaaatattcgatcgg	114	vvi-MIR396d,vvi-MIR396c,vvi-MIR396b,vvi-MIR396a,mtr-MIR396b,mtr-MIR396a,mtr-MIR396c,gma-MIR396i,gma-MIR396e,gma-MIR396a,gma-MIR396h,gma-MIR396c,gma-MIR396g,gma-MIR396b,gma-MIR396f,gma-MIR396d,gma-MIR396k,gma-MIR396j,ptc-MIR396b,ptc-MIR396a,ptc-MIR396d,ptc-MIR396c,ptc-MIR396e,ptc-MIR396f,ath-MIR396a,ath-MIR396b,stu-MIR396,mdm-MIR396b,mdm-MIR396c,mdm-MIR396d,mdm-MIR396e,mdm-MIR396g,mdm-MIR396f,mdm-…	mtr-MIR396b	tattcTTCCACAGCTTTCTTGAACTGcatccaaattgagttcctttgcattgccatggccattgttttgcgGTTCAATAAAGCTGTGGGAAGata	mtr-miR396b-3p	GTTCAATAAAGCTGTGGGAAG	3'	Diff	gp2a	...((((..(((.......(((((((((..(((((.((((((((((((.((((((((((..((((.(((.............))).......(((........))).....)))).)))))))))).)))))))))))).)))))..)))))))))...)))..))))...	165	42.1	-70.3	1	78.5	87	48	11.5	4.5	25.5	80.8351	74.9086	51.5088	14.916	4.477	20.101	middle
82	104	csn-miR396b_R+1_1	TTCCACAGCTTTCTTGAACTG	21	Sc0004056	-	151495	151615	aaatgaccctctttgtatttTTCCACAGCTTTCTTGAACTGcattagtgaaatcttgatttttttatgattcaattgtTGCGGTTCAGTGAAGCTGTGGaaagatacagatagagtcaagc	113	vvi-MIR396d,vvi-MIR396c,vvi-MIR396b,vvi-MIR396a,mtr-MIR396b,mtr-MIR396a,mtr-MIR396c,gma-MIR396i,gma-MIR396e,gma-MIR396a,gma-MIR396h,gma-MIR396c,gma-MIR396g,gma-MIR396b,gma-MIR396f,gma-MIR396d,gma-MIR396k,gma-MIR396j,ptc-MIR396b,ptc-MIR396a,ptc-MIR396d,ptc-MIR396c,ptc-MIR396e,ptc-MIR396f,ath-MIR396a,ath-MIR396b,stu-MIR396,mdm-MIR396b,mdm-MIR396c,mdm-MIR396d,mdm-MIR396e,mdm-MIR396g,mdm-MIR396f,mdm-…	vvi-MIR396b	tcctgccatgcttTTCCACAGCTTTCTTGAACTtcttctccctgtttggtggtctcctacgtttacccatccactgaagttcaagaaagctgtgggaaaccatggctt	vvi-miR396b	TTCCACAGCTTTCTTGAACT	5'	Diff	gp2a	...((((.((.((((((((((((((((((((..((((((((((..(((..((((.(((.....))).))))..)))..))))))))))..)))))))))))))))))))).)).))))...	115	35.5	-56.4	1.3	137956	127266	104924	26129	30397	32293	142059	109578	112593	33890.3	30241.6	25455.7	high
82	106	csn-miR396-p3_1ss1CT	TGCGGTTCAGTGAAGCTGTGG	21	Sc0004056	-	151495	151615	aaatgaccctctttgtatttTTCCACAGCTTTCTTGAACTGcattagtgaaatcttgatttttttatgattcaattgtTGCGGTTCAGTGAAGCTGTGGaaagatacagatagagtcaagc	113	vvi-MIR396d,vvi-MIR396c,vvi-MIR396b,vvi-MIR396a,mtr-MIR396b,mtr-MIR396a,mtr-MIR396c,gma-MIR396i,gma-MIR396e,gma-MIR396a,gma-MIR396h,gma-MIR396c,gma-MIR396g,gma-MIR396b,gma-MIR396f,gma-MIR396d,gma-MIR396k,gma-MIR396j,ptc-MIR396b,ptc-MIR396a,ptc-MIR396d,ptc-MIR396c,ptc-MIR396e,ptc-MIR396f,ath-MIR396a,ath-MIR396b,stu-MIR396,mdm-MIR396b,mdm-MIR396c,mdm-MIR396d,mdm-MIR396e,mdm-MIR396g,mdm-MIR396f,mdm-…	dpr-MIR396	actcttcttatttTTCCACAGCTTTCTTGAACTGcagatcatcgtatcggagtaaactggagatgacgcggttcagtgaagctgtgggagataatgagagggtc	dpr-MIR396-p3	cgcggttcagtgaagctgtgg	3'	New	gp2a	...((((.((.((((((((((((((((((((..((((((((((..(((..((((.(((.....))).))))..)))..))))))))))..)))))))))))))))))))).)).))))...	115	35.5	-56.4	1.3	72	119	105	12	30	42	74.1418	102.461	112.676	15.5645	29.8467	33.1075	middle
83	107	csn-miR396a_2ss5AC21AT	TTCCCCAGCTTTCTTGAACTT	21	Sc0002197	-	260246	260412	aggaagtgaaaacagtaagtcctgtcatgcttTTCCACAGCTTTCTTGAACTTcttccatatatttcttttctttttcttctttttatttaaatttgggcgtgtatagaaGTTCAAGAAACCTGTGGGAGAaaatggcaagtctaggacttttgtcaaccacttgat	110	vvi-MIR396b,vvi-MIR396a,vvi-MIR396d,vvi-MIR396c,mtr-MIR396a,mtr-MIR396b,gma-MIR396c,gma-MIR396g,gma-MIR396b,gma-MIR396f,gma-MIR396d,gma-MIR396k,gma-MIR396i,gma-MIR396e,gma-MIR396a,gma-MIR396h,ptc-MIR396d,ptc-MIR396c,ptc-MIR396e,ptc-MIR396b,ptc-MIR396a,ptc-MIR396g,ath-MIR396b,ath-MIR396a,stu-MIR396,mdm-MIR396c,mdm-MIR396d,mdm-MIR396e,mdm-MIR396b,mdm-MIR396a,aly-MIR396b,aly-MIR396a,ppe-MIR396b,ppe-…	vvi-MIR396a	tcctgtcatgcttTTCCACAGCTTTCTTGAACTActtttccatctacctgtttgatgatcttcttcataaggagtgtgaaatagaagctcaagaaagctgtgggaggacatggcaa	vvi-miR396a	TTCCACAGCTTTCTTGAACTA	5'	Diff	gp2a	...(((((...((((.((((((((((((..((((((((((.((((((((((((((...((((((..((............................))..)))))))))))))))))))).))))))))))..))))))......))))))))))....)))))...	161	35.3	-55.3	0.9	1988.5	2086.5	1977	335.5	256	225.5	2047.65	1796.51	2121.52	435.157	254.691	177.756	high
83	108	csn-miR396a-3p_2ss2CT11GC	GTTCAAGAAACCTGTGGGAGA	21	Sc0002197	-	260246	260412	aggaagtgaaaacagtaagtcctgtcatgcttTTCCACAGCTTTCTTGAACTTcttccatatatttcttttctttttcttctttttatttaaatttgggcgtgtatagaaGTTCAAGAAACCTGTGGGAGAaaatggcaagtctaggacttttgtcaaccacttgat	110	vvi-MIR396b,vvi-MIR396a,vvi-MIR396d,vvi-MIR396c,mtr-MIR396a,mtr-MIR396b,gma-MIR396c,gma-MIR396g,gma-MIR396b,gma-MIR396f,gma-MIR396d,gma-MIR396k,gma-MIR396i,gma-MIR396e,gma-MIR396a,gma-MIR396h,ptc-MIR396d,ptc-MIR396c,ptc-MIR396e,ptc-MIR396b,ptc-MIR396a,ptc-MIR396g,ath-MIR396b,ath-MIR396a,stu-MIR396,mdm-MIR396c,mdm-MIR396d,mdm-MIR396e,mdm-MIR396b,mdm-MIR396a,aly-MIR396b,aly-MIR396a,ppe-MIR396b,ppe-…	mtr-MIR396a	tgcttTTCCACAGCTTTCTTGAACTTctttcgtatcttaaatctgttttcaagattaaaagtcctagaaGCTCAAGAAAGCTGTGGGAGAata	mtr-miR396a-3p	GCTCAAGAAAGCTGTGGGAGA	3'	Diff	gp2a	...(((((...((((.((((((((((((..((((((((((.((((((((((((((...((((((..((............................))..)))))))))))))))))))).))))))))))..))))))......))))))))))....)))))...	161	35.3	-55.3	0.9	3	8	0	0	0	0	3.08924	6.88815	0	0	0	0	low
84	109	csn-miR396b_R+1_2	TTCCACAGCTTTCTTGAACTT	21	Sc0004056	+	135964	136091	ttgctaagtcctgtcatgtttTTCCACAGCTTTCTTGAACTTcatgatctagagatttggagagagagacaaagagaacaatacctgaagTTCAAGGAAGCTGTGGGAAGacatggcaaatttagggc	107	vvi-MIR396b,vvi-MIR396d,vvi-MIR396a,vvi-MIR396c,mtr-MIR396a,mtr-MIR396b,gma-MIR396c,gma-MIR396g,gma-MIR396b,gma-MIR396f,gma-MIR396d,gma-MIR396k,gma-MIR396i,gma-MIR396e,gma-MIR396a,gma-MIR396h,ptc-MIR396d,ptc-MIR396c,ptc-MIR396e,ptc-MIR396b,ptc-MIR396a,ath-MIR396b,ath-MIR396a,stu-MIR396,mdm-MIR396c,mdm-MIR396d,mdm-MIR396e,mdm-MIR396b,mdm-MIR396a,aly-MIR396b,aly-MIR396a,ppe-MIR396b,ppe-MIR396a,nta-…	vvi-MIR396c	ttctgtgatcTTCCACAGCTTTCTTGAACTgttttggaagccttccacttccatgcaatggaggagttcaaccaacagctcaggaaagttgtggaacattactgagag	vvi-miR396b	TTCCACAGCTTTCTTGAACT	5'	Diff	gp2a	...((((((..(((((((((((((((((((((((((((((((((...........((((..........))))............))))))))))))))))))))))))))))))))).))))))...	122	41.4	-58.4	1.1	137956	127266	104924	26129	30397	32293	142059	109578	112593	33890.3	30241.6	25455.7	high
84	110	csn-miR396b-p3_2ss7AG20AG	TTCAAGGAAGCTGTGGGAAG	20	Sc0004056	+	135964	136091	ttgctaagtcctgtcatgtttTTCCACAGCTTTCTTGAACTTcatgatctagagatttggagagagagacaaagagaacaatacctgaagTTCAAGGAAGCTGTGGGAAGacatggcaaatttagggc	107	vvi-MIR396b,vvi-MIR396d,vvi-MIR396a,vvi-MIR396c,mtr-MIR396a,mtr-MIR396b,gma-MIR396c,gma-MIR396g,gma-MIR396b,gma-MIR396f,gma-MIR396d,gma-MIR396k,gma-MIR396i,gma-MIR396e,gma-MIR396a,gma-MIR396h,ptc-MIR396d,ptc-MIR396c,ptc-MIR396e,ptc-MIR396b,ptc-MIR396a,ath-MIR396b,ath-MIR396a,stu-MIR396,mdm-MIR396c,mdm-MIR396d,mdm-MIR396e,mdm-MIR396b,mdm-MIR396a,aly-MIR396b,aly-MIR396a,ppe-MIR396b,ppe-MIR396a,nta-…	vvi-MIR396b	tcctgccatgcttTTCCACAGCTTTCTTGAACTtcttctccctgtttggtggtctcctacgtttacccatccactgaagttcaagaaagctgtgggaaaccatggctt	vvi-MIR396b-p3	ttcaagaaagctgtgggaaa	3'	New	gp2a	...((((((..(((((((((((((((((((((((((((((((((...........((((..........))))............))))))))))))))))))))))))))))))))).))))))...	122	41.4	-58.4	1.1	308	291.5	224.5	276	432.5	635	317.162	250.987	240.911	357.983	430.289	500.554	middle
85	109	csn-miR396b_R+1_2	TTCCACAGCTTTCTTGAACTT	21	xpSc0055518	+	6331	6477	ttagggtcgactaatatttTTCCACAGCTTTCTTGAACTTaaaaatggcactgactgactagtatacaagtcattacccattattagccatgatgagcttcaaaactaggttCAAGAAAGCTGTGGGAAAACAtaagttgattcaaa	109	vvi-MIR396b,vvi-MIR396d,vvi-MIR396a,vvi-MIR396c,mtr-MIR396a,mtr-MIR396b,gma-MIR396c,gma-MIR396g,gma-MIR396b,gma-MIR396f,gma-MIR396d,gma-MIR396k,gma-MIR396i,gma-MIR396e,gma-MIR396a,gma-MIR396h,ptc-MIR396d,ptc-MIR396c,ptc-MIR396e,ptc-MIR396b,ptc-MIR396a,ptc-MIR396g,ath-MIR396b,ath-MIR396a,stu-MIR396,mdm-MIR396e,mdm-MIR396c,mdm-MIR396d,mdm-MIR396b,mdm-MIR396a,aly-MIR396b,aly-MIR396a,ppe-MIR396b,ppe-…	vvi-MIR396c	ttctgtgatcTTCCACAGCTTTCTTGAACTgttttggaagccttccacttccatgcaatggaggagttcaaccaacagctcaggaaagttgtggaacattactgagag	vvi-miR396b	TTCCACAGCTTTCTTGAACT	5'	Diff	gp2a	...(..((((((.((.(((((((((((((((((((((((((..(((((...(((((............)))))....)))))...((((.....).))).......))))))))))))))))))))))))).)).))))))..)...	141	35.4	-58.6	1.1	137956	127266	104924	26129	30397	32293	142059	109578	112593	33890.3	30241.6	25455.7	high
85	111	csn-miR396a-p3_1ss17GA	CAAGAAAGCTGTGGGAAGACA	21	xpSc0055518	+	6331	6477	ttagggtcgactaatatttTTCCACAGCTTTCTTGAACTTaaaaatggcactgactgactagtatacaagtcattacccattattagccatgatgagcttcaaaactaggttCAAGAAAGCTGTGGGAAAACAtaagttgattcaaa	109	vvi-MIR396b,vvi-MIR396d,vvi-MIR396a,vvi-MIR396c,mtr-MIR396a,mtr-MIR396b,gma-MIR396c,gma-MIR396g,gma-MIR396b,gma-MIR396f,gma-MIR396d,gma-MIR396k,gma-MIR396i,gma-MIR396e,gma-MIR396a,gma-MIR396h,ptc-MIR396d,ptc-MIR396c,ptc-MIR396e,ptc-MIR396b,ptc-MIR396a,ptc-MIR396g,ath-MIR396b,ath-MIR396a,stu-MIR396,mdm-MIR396e,mdm-MIR396c,mdm-MIR396d,mdm-MIR396b,mdm-MIR396a,aly-MIR396b,aly-MIR396a,ppe-MIR396b,ppe-…	vvi-MIR396a	tcctgtcatgcttTTCCACAGCTTTCTTGAACTActtttccatctacctgtttgatgatcttcttcataaggagtgtgaaatagaagctcaagaaagctgtgggaggacatggcaa	vvi-MIR396a-p3	caagaaagctgtgggaggaca	3'	New	gp2a	...(..((((((.((.(((((((((((((((((((((((((..(((((...(((((............)))))....)))))...((((.....).))).......))))))))))))))))))))))))).)).))))))..)...	141	35.4	-58.6	1.1	86.5	104	72.5	8.5	1.5	13	89.0731	89.5459	77.7998	11.0248	1.49233	10.2476	middle
86	112	csn-miR396b_R+1_1ss2TC_1	TCCCACAGCTTTCTTGAACTG	21	Sc0000948	+	669956	670098	ttttgaccctctccgtatttTCCCACAGCTTTATTGAACTGcaacgattgaatggccttttgatacctaaatttgcaagagtgaggatgatgcgatcggatgcagttcaagaaagctgtggaagaatacaaagaggatcatct	50	vvi-MIR396d,vvi-MIR396c,mtr-MIR396b,gma-MIR396i,gma-MIR396e,gma-MIR396a,gma-MIR396h,ptc-MIR396b,ptc-MIR396a,ath-MIR396a,mdm-MIR396b,aly-MIR396a,nta-MIR396a,mes-MIR396a,mes-MIR396b,lus-MIR396d,lus-MIR396c,lus-MIR396a,cme-MIR396b,tcc-MIR396b,tcc-MIR396a,cpa-MIR396,ghr-MIR396b,ghr-MIR396a,sly-MIR396a,lja-MIR396,csi-MIR396b,csi-MIR396a,cca-MIR396b,aqc-MIR396a,hbr-MIR396b,ssl-MIR396,dpr-MIR396,aau-MIR…	vvi-MIR396c	ttctgtgatcTTCCACAGCTTTCTTGAACTgttttggaagccttccacttccatgcaatggaggagttcaaccaacagctcaggaaagttgtggaacattactgagag	vvi-miR396b	TTCCACAGCTTTCTTGAACT	5'	Diff	gp2a	...(((.(((((..(((((((.((((((((((.((((((((((.((((((.....((((.......................))))......))))))..)))))))))).)))))))))).)))))))..))))).)))...	137	41.3	-59.6	1	42	36.5	38	7.5	7	10.5	43.2494	31.4272	40.7778	9.72779	6.96422	8.27688	middle
87	113	csn-miR397a_1ss2CA	TAATTGAGTGCAGCGTTGATG	21	xfSc0001732	-	41364	41463	tcttaaaaacaTAATTGAGTGCAGCGTTGATGaatcatcccatttcacttacaaaaaaattgtggtTTCATCCGCGCTGCACTCAATcatgtttttggct	28	vvi-MIR397a,mtr-MIR397,gma-MIR397a,gma-MIR397b,ptc-MIR397a,ath-MIR397a,mdm-MIR397a,mdm-MIR397b,aly-MIR397a,aly-MIR397b,ppe-MIR397,nta-MIR397,lus-MIR397b,lus-MIR397a,cme-MIR397,bna-MIR397a,bna-MIR397b,tcc-MIR397,sly-MIR397,rco-MIR397,lja-MIR397,csi-MIR397,ssl-MIR397,osa-MIR397a,osa-MIR397b,bdi-MIR397a,bdi-MIR397b,sbi-MIR397,	vvi-MIR397a	gaagaaaacaTCATTGAGTGCAGCGTTGATGaaactgaagtattccatttttcagcttctttgaagtccggcaagatgggttctggttgattccattggcgctgcactcaatcatgtc	vvi-miR397a	TCATTGAGTGCAGCGTTGATG	5'	Diff	gp2a	...(((((((((.(((((((((((((..((((((.....((((..................)))).))))))..))))))))))))).)))))))))...	94	37	-40.3	1.1	7	3	6	22	13	11	7.20823	2.58306	6.4386	28.5349	12.9335	8.67102	middle
87	114	csn-miR397-p3_2ss7AC17CT	TTCATCCGCGCTGCACTCAAT	21	xfSc0001732	-	41364	41463	tcttaaaaacaTAATTGAGTGCAGCGTTGATGaatcatcccatttcacttacaaaaaaattgtggtTTCATCCGCGCTGCACTCAATcatgtttttggct	28	vvi-MIR397a,mtr-MIR397,gma-MIR397a,gma-MIR397b,ptc-MIR397a,ath-MIR397a,mdm-MIR397a,mdm-MIR397b,aly-MIR397a,aly-MIR397b,ppe-MIR397,nta-MIR397,lus-MIR397b,lus-MIR397a,cme-MIR397,bna-MIR397a,bna-MIR397b,tcc-MIR397,sly-MIR397,rco-MIR397,lja-MIR397,csi-MIR397,ssl-MIR397,osa-MIR397a,osa-MIR397b,bdi-MIR397a,bdi-MIR397b,sbi-MIR397,	ppe-MIR397	aagggtggctcaaaatcaatcatgcagatgcagattatgagagcagtggaggttccagattgaagaaacaTCATTGAGTGCAGCGTTGATGaattgaaattctttcgaaatttcatcagcgctgcacccaattatgtttctatccaattttggcaaagtactggctggcttctctggtcttcttctttcttttagccctttt	ppe-MIR397-p3	ttcatcagcgctgcacccaat	3'	New	gp2a	...(((((((((.(((((((((((((..((((((.....((((..................)))).))))))..))))))))))))).)))))))))...	94	37	-40.3	1.1	0	0	0	8	12	58	0	0	0	10.3763	11.9387	45.7199	middle
88	115	csn-miR397a_1ss10GC	TCATTGAGTCCAGCGTTGATG	21	Sc0004418	+	13040	13148	ccccagattgcagaatcaTCATTGAGTCCAGCATTGATGaaaagccctgtagtttctcttggatttcttcatcaatgctgcactcaatcatgctttcgctcttctgaga	23	vvi-MIR397a,mtr-MIR397,gma-MIR397a,gma-MIR397b,ptc-MIR397a,ath-MIR397a,mdm-MIR397a,mdm-MIR397b,aly-MIR397a,aly-MIR397b,ppe-MIR397,nta-MIR397,lus-MIR397b,cme-MIR397,bna-MIR397a,bna-MIR397b,tcc-MIR397,rco-MIR397,csi-MIR397,ssl-MIR397,osa-MIR397a,bdi-MIR397a,sbi-MIR397,	vvi-MIR397a	gaagaaaacaTCATTGAGTGCAGCGTTGATGaaactgaagtattccatttttcagcttctttgaagtccggcaagatgggttctggttgattccattggcgctgcactcaatcatgtc	vvi-miR397a	TCATTGAGTGCAGCGTTGATG	5'	Diff	gp2a	...((((..((..((.(((.(((((((.(((((((((((((((..((.............))..)).))))))))))))).))))))).))).))..))...))))...	103	43.1	-40.1	0.9	3	0	3	15	10	15	3.08924	0	3.2193	19.4556	9.94888	11.8241	middle
89	116	csn-miR398b	TGTGTTCTCAGGTCGCCCCTG	21	Sc0001777	+	190015	190125	aatgtggatgggtccaacaagagcgactttagatcgcatcagggtgcatctgatctgactgtgtttgatgaTGTGTTCTCAGGTCGCCCTTGcaggatttccttctactgt	29	vvi-MIR398b,vvi-MIR398c,mtr-MIR398c,mtr-MIR398b,gma-MIR398d,gma-MIR398c,ptc-MIR398c,ptc-MIR398b,mdm-MIR398b,mdm-MIR398c,ppe-MIR398a,ppe-MIR398b,nta-MIR398,lus-MIR398a,lus-MIR398f,cme-MIR398a,tcc-MIR398a,cpa-MIR398,rco-MIR398b,cca-MIR398,aqc-MIR398b,osa-MIR398b,bdi-MIR398a,sbi-MIR398,zma-MIR398b,zma-MIR398a,ata-MIR398g,ata-MIR398f,tae-MIR398,	vvi-MIR398c	gtgtcctacaggagtgacctgagaatcacatgcccgcatcacccatctttgctctcaTGTGTTCTCAGGTCGCCCCTGctggactccc	vvi-miR398b	TGTGTTCTCAGGTCGCCCCTG	3'	Yes	gp2a	...(((((.((((((..((((.(((((((.(((.(((((((..(..((((......)).))..)....))))))).))).))))))).))))..))))..)).)))))...	105	47.7	-43.7	0.8	94	191	108	1282	694	2483	96.7962	164.455	115.895	1662.8	690.453	1957.28	high
90	117	csn-miR399d-p5_2ss8AG17TC	ACAGGGCGGTCCTCCTCTGGC	21	Sc0000153	-	548843	548944	ttagagaataACAGGGCGGTCCTCCTCTGGCaaggagatcaccatgcaaacacatgcatacattctgcttTGCCAAAGGAGAATTGCCCTGccattctctct	39	vvi-MIR399a,vvi-MIR399h,mtr-MIR399c,mtr-MIR399h,mtr-MIR399i,gma-MIR399i,ptc-MIR399f,ptc-MIR399g,mdm-MIR399c,mdm-MIR399b,mdm-MIR399a,ppe-MIR399b,mes-MIR399a,lus-MIR399b,lus-MIR399d,cme-MIR399d,cme-MIR399e,cme-MIR399g,tcc-MIR399g,ghr-MIR399d,csi-MIR399c,csi-MIR399e,vun-MIR399b,ssl-MIR399,osa-MIR399a,osa-MIR399b,osa-MIR399c,bdi-MIR399c,bdi-MIR399b,sbi-MIR399c,sbi-MIR399j,sbi-MIR399a,sbi-MIR399h,zma-…	lus-MIR399d	gagctctgtgtggttgaggaataacagggcagtcctcctttggcggactgaaatcatgctaattggagaaatcatgcatgcaatacccttctgcttTGCCAAAGGAGAATTGCCCTGccatttccctcccaccaaaatcctc	lus-MIR399d-p5	acagggcagtcctcctttggc	5'	New	gp2a	..(((((((..((((((..(.(((((.(((((((((((.....(((((......)))))....))).)))))))).))))).)..))))))..)))))))..	98	48	-49.6	1	0	1.5	0	0	0	0	0	1.29153	0	0	0	0	low
90	118	csn-miR399a	TGCCAAAGGAGAATTGCCCTG	21	Sc0000153	-	548843	548944	ttagagaataACAGGGCGGTCCTCCTCTGGCaaggagatcaccatgcaaacacatgcatacattctgcttTGCCAAAGGAGAATTGCCCTGccattctctct	39	vvi-MIR399a,vvi-MIR399h,mtr-MIR399c,mtr-MIR399h,mtr-MIR399i,gma-MIR399i,ptc-MIR399f,ptc-MIR399g,mdm-MIR399c,mdm-MIR399b,mdm-MIR399a,ppe-MIR399b,mes-MIR399a,lus-MIR399b,lus-MIR399d,cme-MIR399d,cme-MIR399e,cme-MIR399g,tcc-MIR399g,ghr-MIR399d,csi-MIR399c,csi-MIR399e,vun-MIR399b,ssl-MIR399,osa-MIR399a,osa-MIR399b,osa-MIR399c,bdi-MIR399c,bdi-MIR399b,sbi-MIR399c,sbi-MIR399j,sbi-MIR399a,sbi-MIR399h,zma-…	vvi-MIR399h	aggaataacagtgcaatcctcctttggcagaaagatcatgcacatgcatacttctgtttTGCCAAAGGAGAATTGCCCTGccattcgctc	vvi-miR399a	TGCCAAAGGAGAATTGCCCTG	3'	Yes	gp2a	..(((((((..((((((..(.(((((.(((((((((((.....(((((......)))))....))).)))))))).))))).)..))))))..)))))))..	98	48	-49.6	1	34	99.5	26	0	0	0	35.0114	85.6713	27.9006	0	0	0	middle
91	117	csn-miR399d-p5_2ss8AG17TC	ACAGGGCGGTCCTCCTCTGGC	21	Sc0000759	-	524027	524126	taaagaataACAGGGCGGTCCTCCTCTGGCaaggagatcaccatgcaaacacatgcatacattctgcttTGCCAAAGGAGAATTGCCCTGccattctctc	62	vvi-MIR399a,vvi-MIR399h,vvi-MIR399c,vvi-MIR399b,mtr-MIR399l,mtr-MIR399p,gma-MIR399i,gma-MIR399h,gma-MIR399b,gma-MIR399a,gma-MIR399c,ptc-MIR399f,ptc-MIR399g,ath-MIR399c,ath-MIR399b,gra-MIR399,mdm-MIR399c,mdm-MIR399b,mdm-MIR399a,mdm-MIR399i,mdm-MIR399j,aly-MIR399c,aly-MIR399b,ppe-MIR399b,mes-MIR399a,mes-MIR399f,lus-MIR399b,lus-MIR399d,cme-MIR399d,cme-MIR399e,cme-MIR399g,tcc-MIR399g,tcc-MIR399i,rco-…	lus-MIR399d	gagctctgtgtggttgaggaataacagggcagtcctcctttggcggactgaaatcatgctaattggagaaatcatgcatgcaatacccttctgcttTGCCAAAGGAGAATTGCCCTGccatttccctcccaccaaaatcctc	lus-MIR399d-p5	acagggcagtcctcctttggc	5'	New	gp2a	...(((((..((((((..(.(((((.(((((((((((.....(((((......)))))....))).)))))))).))))).)..))))))..)))))...	94	48	-45.3	0.9	0	1.5	0	0	0	0	0	1.29153	0	0	0	0	low
91	118	csn-miR399a	TGCCAAAGGAGAATTGCCCTG	21	Sc0000759	-	524027	524126	taaagaataACAGGGCGGTCCTCCTCTGGCaaggagatcaccatgcaaacacatgcatacattctgcttTGCCAAAGGAGAATTGCCCTGccattctctc	62	vvi-MIR399a,vvi-MIR399h,vvi-MIR399c,vvi-MIR399b,mtr-MIR399l,mtr-MIR399p,gma-MIR399i,gma-MIR399h,gma-MIR399b,gma-MIR399a,gma-MIR399c,ptc-MIR399f,ptc-MIR399g,ath-MIR399c,ath-MIR399b,gra-MIR399,mdm-MIR399c,mdm-MIR399b,mdm-MIR399a,mdm-MIR399i,mdm-MIR399j,aly-MIR399c,aly-MIR399b,ppe-MIR399b,mes-MIR399a,mes-MIR399f,lus-MIR399b,lus-MIR399d,cme-MIR399d,cme-MIR399e,cme-MIR399g,tcc-MIR399g,tcc-MIR399i,rco-…	vvi-MIR399h	aggaataacagtgcaatcctcctttggcagaaagatcatgcacatgcatacttctgtttTGCCAAAGGAGAATTGCCCTGccattcgctc	vvi-miR399a	TGCCAAAGGAGAATTGCCCTG	3'	Yes	gp2a	...(((((..((((((..(.(((((.(((((((((((.....(((((......)))))....))).)))))))).))))).)..))))))..)))))...	94	48	-45.3	0.9	34	99.5	26	0	0	0	35.0114	85.6713	27.9006	0	0	0	middle
92	119	csn-miR399b-p5_2ss1AC20CT	CCAGTGATAGGGCTACTCTTT	21	Sc0001657	+	318818	318960	tgataagcaaaCCAGTGATAGGGCTACTCTTTcttggcatgtaattaatggagagattcgttgaatatttggtgcaatgcatataattccagtgagatatataTGCCAAAGGAGAGTTGCCCTGtcactgatttagcttaatg	41	vvi-MIR399c,vvi-MIR399b,mtr-MIR399l,mtr-MIR399p,gma-MIR399h,gma-MIR399b,gma-MIR399a,gma-MIR399c,ptc-MIR399i,ptc-MIR399e,ath-MIR399c,ath-MIR399b,gra-MIR399,stu-MIR399i,mdm-MIR399i,mdm-MIR399j,mdm-MIR399d,aly-MIR399c,aly-MIR399b,ppe-MIR399a,nta-MIR399b,mes-MIR399f,cme-MIR399d,cme-MIR399e,cme-MIR399b,cme-MIR399g,tcc-MIR399i,sly-MIR399,rco-MIR399a,csi-MIR399d,csi-MIR399b,aqc-MIR399,vun-MIR399a,pvu-MI…	nta-MIR399b	aacagtgatagggctactctctattggcatgcagttatatatgtagtgactccacttcataatataatttagctgacaCGCCAAAGGAGAGCTGCCCTGttactgtctc	nta-MIR399b-p5	acagtgatagggctactctct	5'	New	gp2a	...((((((((.((((((((((((.((((((..(((((((((((((..(((((..((.(((((.((.....)).))))).))....)))))....))).))))))))))..)))))).)))))))))))).))).)))))...	137	37.8	-60.6	1.1	0	6	0	0	0	0	0	5.16611	0	0	0	0	low
92	120	csn-miR399b_1ss21GA	TGCCAAAGGAGAGTTGCCCTA	21	Sc0001657	+	318818	318960	tgataagcaaaCCAGTGATAGGGCTACTCTTTcttggcatgtaattaatggagagattcgttgaatatttggtgcaatgcatataattccagtgagatatataTGCCAAAGGAGAGTTGCCCTGtcactgatttagcttaatg	41	vvi-MIR399c,vvi-MIR399b,mtr-MIR399l,mtr-MIR399p,gma-MIR399h,gma-MIR399b,gma-MIR399a,gma-MIR399c,ptc-MIR399i,ptc-MIR399e,ath-MIR399c,ath-MIR399b,gra-MIR399,stu-MIR399i,mdm-MIR399i,mdm-MIR399j,mdm-MIR399d,aly-MIR399c,aly-MIR399b,ppe-MIR399a,nta-MIR399b,mes-MIR399f,cme-MIR399d,cme-MIR399e,cme-MIR399b,cme-MIR399g,tcc-MIR399i,sly-MIR399,rco-MIR399a,csi-MIR399d,csi-MIR399b,aqc-MIR399,vun-MIR399a,pvu-MI…	vvi-MIR399b	atcaatcatagggcacctctttcttggcaggcactggctcctatatatgaatatacatagcttagctgcagtaaaaagatgtgactTGCCAAAGGAGAGTTGCCCTGtgactgcttc	vvi-miR399b	TGCCAAAGGAGAGTTGCCCTG	3'	Diff	gp2a	...((((((((.((((((((((((.((((((..(((((((((((((..(((((..((.(((((.((.....)).))))).))....)))))....))).))))))))))..)))))).)))))))))))).))).)))))...	137	37.8	-60.6	1.1	382.5	1081	634.5	15	5	16	393.878	930.761	680.882	19.4556	4.97444	12.6124	middle
93	121	csn-miR399e	TGCCAAAGGAGATTTGCCTCG	21	Sc0001417	+	320157	320286	agctgtagatgaatattactaggcaaaacctccattggcagcaggcagccatttaggacacatttgcgaaatgtgttgctcaagtgtgcccacTGCCAAAGGAGATTTGCCTCGcaattcttctacaatt	2	ath-MIR399e,aly-MIR399e,	ath-MIR399e	gaaagcattacagggcgaatcctctattggcagtggaagttgatgacccttatatgttattttctcatcattttcctcTGCCAAAGGAGATTTGCCTCGcaatgcttca	ath-miR399e	TGCCAAAGGAGATTTGCCTCG	3'	Yes	gp2a	...((((((.((((......(((((((..((((.(((((((..((((..((((((((((((((((...))))))))).)).)))))))))..))))))).)))).)))))))....)))).))))))...	124	44.6	-52.7	0.9	4	7	0	0	0	0	4.11899	6.02713	0	0	0	0	low
94	122	csn-miR399c_L+2R-2	TTTGCCAAAGGAGATTTGCTC	21	Sc0001524	+	441529	441644	cactgcaagtgaattactgagtgagtctcctcttggcaaccagtgttgtagttgtctgtgaagagtatcatcactgTTTGCCAAAGGAGATTTGCTCattaatttcatgtgcaata	1	ptc-MIR399c,	ptc-MIR399c	ggagcattgctgagcaaatttcctttggcagataccacaagtaacaagagcttaagttgttcattTGCCAAAGGAGATTTGCTCACcaattcca	ptc-miR399c	TGCCAAAGGAGATTTGCTCAC	3'	Diff	gp2a	...((((..(((((((.((((..((((((((.(((((((.(((((.((......(((....)))....)).))))).)))))))))))))))..)))).))))).))..))))...	110	40.5	-50.3	1.1	3	17	0	0	0	0	3.08924	14.6373	0	0	0	0	middle
95	123	csn-miR399a_1ss13AT	TGCCAAAGGAGATTTGCCCTG	21	Sc0001524	+	447235	447338	ttacagggcacattcctcctttggcaggcggcttcttgactgcatatgatttatctcataagcaagaaaagtaagcttacTGCCAAAGGAGATTTGCCCTGcaa	30	vvi-MIR399a,vvi-MIR399g,mtr-MIR399h,mtr-MIR399c,mtr-MIR399i,gma-MIR399i,ptc-MIR399g,ptc-MIR399a,ath-MIR399a,ath-MIR399d,mdm-MIR399a,mdm-MIR399c,mdm-MIR399b,aly-MIR399f,aly-MIR399i,aly-MIR399d,aly-MIR399g,ppe-MIR399b,lus-MIR399b,cme-MIR399a,cme-MIR399d,cme-MIR399g,cme-MIR399e,tcc-MIR399h,ghr-MIR399d,ghr-MIR399e,cca-MIR399,vun-MIR399b,sbi-MIR399h,hvu-MIR399,	vvi-MIR399a	gagaataacagtgtgattctcctttggcagagatatcacgcatggagtagaaggcggtagctgctcTGCCAAAGGAGAATTGCCCTGttattcaatt	vvi-miR399a	TGCCAAAGGAGAATTGCCCTG	3'	Diff	gp2a	...(((((((.((..((((((((((((..((((((((..((((.(((((......))))).)).))..))).)))))..)))))))))))))).)))))))...	98	44.2	-50.6	1.1	57	211.5	47	0	0	0	58.6956	182.105	50.4357	0	0	0	middle
96	124	csn-miR403a-p5_1ss20TC	GGTTTGTGCGTGAATTTAACA	21	Sc0000104	-	102861	103009	gatttcaGGTTTGTGCGTGAATTTAACAggaccctccttccctacccaccaataccctctcttcaattccttttttttattattttattttatttttattttttatttggattgatggtgTTAGATTCACGCACAAACTCGtgatctat	32	vvi-MIR403f,vvi-MIR403b,vvi-MIR403d,vvi-MIR403a,vvi-MIR403e,vvi-MIR403c,ptc-MIR403a,ptc-MIR403d,ptc-MIR403b,ptc-MIR403c,ath-MIR403,mdm-MIR403a,mdm-MIR403b,aly-MIR403a,aly-MIR403b,ppe-MIR403,mes-MIR403b,mes-MIR403a,bra-MIR403,bna-MIR403,tcc-MIR403a,tcc-MIR403b,rco-MIR403b,rco-MIR403a,csi-MIR403,htu-MIR403b,htu-MIR403e,htu-MIR403c,htu-MIR403d,htu-MIR403a,har-MIR403a,hpe-MIR403a,	tcc-MIR403a	aaaggaggaggcagatttcaggtttgtgcgtgaatttaataaaaccgtaagccacaaaaatctggaaggtggatttagtttcatgTTAGATTCACGCACAAACTCGtaatctgtcttttcattctt	tcc-MIR403a-p5	ggtttgtgcgtgaatttaata	5'	New	gp2a	((((...((((((((((((((((((((.((.....))................(((.((..(((((..............((........))..............)))))..)).)))))))))))))))))))))))...))))...	146	33.6	-39.3	0.8	101	47	33	40	29	46	104.004	40.4679	35.4123	51.8816	28.8518	36.2606	middle
96	125	csn-miR403a	TTAGATTCACGCACAAACTCG	21	Sc0000104	-	102861	103009	gatttcaGGTTTGTGCGTGAATTTAACAggaccctccttccctacccaccaataccctctcttcaattccttttttttattattttattttatttttattttttatttggattgatggtgTTAGATTCACGCACAAACTCGtgatctat	32	vvi-MIR403f,vvi-MIR403b,vvi-MIR403d,vvi-MIR403a,vvi-MIR403e,vvi-MIR403c,ptc-MIR403a,ptc-MIR403d,ptc-MIR403b,ptc-MIR403c,ath-MIR403,mdm-MIR403a,mdm-MIR403b,aly-MIR403a,aly-MIR403b,ppe-MIR403,mes-MIR403b,mes-MIR403a,bra-MIR403,bna-MIR403,tcc-MIR403a,tcc-MIR403b,rco-MIR403b,rco-MIR403a,csi-MIR403,htu-MIR403b,htu-MIR403e,htu-MIR403c,htu-MIR403d,htu-MIR403a,har-MIR403a,hpe-MIR403a,	vvi-MIR403c	gcacatctcaagtttgtgcgtgaatcaaaccccatcgtagccgtccatatcttcgggtactaatcacggggcgattcgacgccgTTAGATTCACGCACAAACTCGtgatctgtcc	vvi-miR403a	TTAGATTCACGCACAAACTCG	3'	Yes	gp2a	((((...((((((((((((((((((((.((.....))................(((.((..(((((..............((........))..............)))))..)).)))))))))))))))))))))))...))))...	146	33.6	-39.3	0.8	135.5	152	120.5	44	39.5	103.5	139.531	130.875	129.309	57.0697	39.2981	81.5864	middle
97	126	csn-miR403d-p5_1ss14AG	AGTTTGTGCGCGAGTCCAACC	21	Sc0001020	+	393928	394085	cgagacgagacatatctctAGTTTGTGCGCGAGTCCAACCccatcatcccagctgtcctctctgcctttcccagagttcatatctcgaggcaaacccaaaaaccggccaatctgacggtgTTAGATTCACGCACAAACTCGtgatcagtcttctctgc	32	vvi-MIR403d,vvi-MIR403a,vvi-MIR403b,vvi-MIR403c,vvi-MIR403f,vvi-MIR403e,ptc-MIR403b,ptc-MIR403c,ptc-MIR403a,ptc-MIR403d,ath-MIR403,mdm-MIR403a,mdm-MIR403b,aly-MIR403a,aly-MIR403b,ppe-MIR403,mes-MIR403b,mes-MIR403a,bra-MIR403,bna-MIR403,tcc-MIR403b,tcc-MIR403a,rco-MIR403a,rco-MIR403b,csi-MIR403,htu-MIR403b,htu-MIR403d,htu-MIR403e,htu-MIR403c,htu-MIR403a,har-MIR403a,hpe-MIR403a,	vvi-MIR403d	acaaacctcgagtttgtgcgcgaatccaacccctcaatcttctttcaaaggggtgTTAGATTCACGCACAAACTCGggatctgtct	vvi-MIR403d-p5	agtttgtgcgcgaatccaacc	5'	New	gp2a	.((((..((((..(((...((((((((((.(((((.(((.((.(((.....((((.......((((((.....(((.......)))))))))...........)))).....))).)).))).))))).))))))))))...)))..))))))))...	154	51.3	-49.8	0.6	62	58	46	170	196	331	63.8443	49.9391	49.3626	220.497	194.998	260.919	middle
97	125	csn-miR403a	TTAGATTCACGCACAAACTCG	21	Sc0001020	+	393928	394085	cgagacgagacatatctctAGTTTGTGCGCGAGTCCAACCccatcatcccagctgtcctctctgcctttcccagagttcatatctcgaggcaaacccaaaaaccggccaatctgacggtgTTAGATTCACGCACAAACTCGtgatcagtcttctctgc	32	vvi-MIR403d,vvi-MIR403a,vvi-MIR403b,vvi-MIR403c,vvi-MIR403f,vvi-MIR403e,ptc-MIR403b,ptc-MIR403c,ptc-MIR403a,ptc-MIR403d,ath-MIR403,mdm-MIR403a,mdm-MIR403b,aly-MIR403a,aly-MIR403b,ppe-MIR403,mes-MIR403b,mes-MIR403a,bra-MIR403,bna-MIR403,tcc-MIR403b,tcc-MIR403a,rco-MIR403a,rco-MIR403b,csi-MIR403,htu-MIR403b,htu-MIR403d,htu-MIR403e,htu-MIR403c,htu-MIR403a,har-MIR403a,hpe-MIR403a,	vvi-MIR403e	gcacatctcaagtttgtgcgtgaatcaaaccccatcgtagccgtccatatcttcgtgtactaatcacggggcgattcgacgccgTTAGATTCACGCACAAACTCGcgatctgtcc	vvi-miR403a	TTAGATTCACGCACAAACTCG	3'	Yes	gp2a	.((((..((((..(((...((((((((((.(((((.(((.((.(((.....((((.......((((((.....(((.......)))))))))...........)))).....))).)).))).))))).))))))))))...)))..))))))))...	154	51.3	-49.8	0.6	135.5	152	120.5	44	39.5	103.5	139.531	130.875	129.309	57.0697	39.2981	81.5864	middle
98	127	csn-miR403a_R+1_1ss21GT	TTAGATTCACGCACAAACTCTG	22	xfSc0000718	-	39408	39566	gaagaggcatatttcagagttgtgcgtgaatttaaccccactcctctcatccaacagaaccttccccttcccttctgcctgaaatttgtttttgtttttgtgtttttggggttgatgacgTTAGATTCACGCACAAACTCTGtgatatgtcttttcatc	32	vvi-MIR403b,vvi-MIR403c,vvi-MIR403f,vvi-MIR403d,vvi-MIR403a,vvi-MIR403e,ptc-MIR403b,ptc-MIR403c,ptc-MIR403a,ptc-MIR403d,ath-MIR403,mdm-MIR403a,mdm-MIR403b,aly-MIR403a,aly-MIR403b,ppe-MIR403,mes-MIR403b,mes-MIR403a,bra-MIR403,bna-MIR403,tcc-MIR403a,tcc-MIR403b,rco-MIR403a,rco-MIR403b,csi-MIR403,htu-MIR403b,htu-MIR403e,htu-MIR403c,htu-MIR403a,htu-MIR403d,har-MIR403a,hpe-MIR403a,	vvi-MIR403e	gcacatctcaagtttgtgcgtgaatcaaaccccatcgtagccgtccatatcttcgtgtactaatcacggggcgattcgacgccgTTAGATTCACGCACAAACTCGcgatctgtcc	vvi-miR403a	TTAGATTCACGCACAAACTCG	3'	Diff	gp2a	((((((((((((..((((((((((((((((((((((..((..((((.......((((((.............(((.....)))............))))))......))))....))..))))))))))))))))).)))))..))))))))))))...	156	41.5	-57	0.9	26	21	11.5	10.5	7	24	26.7734	18.0814	12.3407	13.6189	6.96422	18.9186	middle
99	128	csn-miR408b-5p	ACGGGGACGAGACAGAGCATG	21	Sc0000321	+	398937	399114	ttggaaaagtgataaaaggtaaagattgaagagggaggatagTCGGGGACGAGACAGAGCATGagatgagattttcatcaacacatttttgactgataaaatatgtcggtgctcttctctTGCACTGCCTCTTCCCTGGCTttcctctctcgttctttctctctgtccctttttctat	43	vvi-MIR408,mtr-MIR408,gma-MIR408b,gma-MIR408c,gma-MIR408d,gma-MIR408a,ptc-MIR408,ath-MIR408,ppt-MIR408b,stu-MIR408b,stu-MIR408a,mdm-MIR408a,mdm-MIR408b,mdm-MIR408d,aly-MIR408,nta-MIR408,mes-MIR408,lus-MIR408a,cme-MIR408,cpa-MIR408,rco-MIR408,csi-MIR408,smo-MIR408,cca-MIR408,pta-MIR408,hbr-MIR408a,hbr-MIR408b,ahy-MIR408,vun-MIR408,dpr-MIR408,osa-MIR408,bdi-MIR408,sbi-MIR408,zma-MIR408a,zma-MIR408b…	stu-MIR408b	ACGGGGACGAGACAGAGCATGagatgtgcaatttttacttgcctattccaTGCACTGCCTCTTCCCTGGCT	stu-miR408b-5p	ACGGGGACGAGACAGAGCATG	5'	Yes	gp2a	..(((((((.((((..((..(((((.....(((((((((.(((((((((.(((.(((.(((.((((.(((.....((((.(((.(((((........))))).))).))))))).)))).))).))).))).))))))))).)))))))))..)))))..)).)))).)))))))...	173	42.1	-73.4	1	13	12	13.5	54.5	39.5	92	13.3867	10.3322	14.4869	70.6886	39.2981	72.5212	middle
99	129	csn-miR408_L-1R+1	TGCACTGCCTCTTCCCTGGCT	21	Sc0000321	+	398937	399114	ttggaaaagtgataaaaggtaaagattgaagagggaggatagTCGGGGACGAGACAGAGCATGagatgagattttcatcaacacatttttgactgataaaatatgtcggtgctcttctctTGCACTGCCTCTTCCCTGGCTttcctctctcgttctttctctctgtccctttttctat	43	vvi-MIR408,mtr-MIR408,gma-MIR408b,gma-MIR408c,gma-MIR408d,gma-MIR408a,ptc-MIR408,ath-MIR408,ppt-MIR408b,stu-MIR408b,stu-MIR408a,mdm-MIR408a,mdm-MIR408b,mdm-MIR408d,aly-MIR408,nta-MIR408,mes-MIR408,lus-MIR408a,cme-MIR408,cpa-MIR408,rco-MIR408,csi-MIR408,smo-MIR408,cca-MIR408,pta-MIR408,hbr-MIR408a,hbr-MIR408b,ahy-MIR408,vun-MIR408,dpr-MIR408,osa-MIR408,bdi-MIR408,sbi-MIR408,zma-MIR408a,zma-MIR408b…	vvi-MIR408	aagaggaagacggggacgaggtagtgcatggatggaactattaacagaagaatgttaagctgtttttgctctacccATGCACTGCCTCTTCCCTGGCtctgtctctc	vvi-miR408	ATGCACTGCCTCTTCCCTGGC	3'	Diff	gp2a	..(((((((.((((..((..(((((.....(((((((((.(((((((((.(((.(((.(((.((((.(((.....((((.(((.(((((........))))).))).))))))).)))).))).))).))).))))))))).)))))))))..)))))..)).)))).)))))))...	173	42.1	-73.4	1	314.5	405	294.5	1878.5	880	6332.5	323.855	348.712	316.028	2436.49	875.502	4991.75	high
100	130	csn-miR408b-5p_1ss8CT	ACGGGGATGAGACAGAGCATG	21	Sc0000427	-	652484	652610	caaagattgaagaggggagACGGGGACGAGACAGAGCATGagatgggattttaattaacacatagaagttgtgttgttattcttctctTGCACTGCCTCTTCCCTGGCTctcctctctctttctctt	43	vvi-MIR408,mtr-MIR408,gma-MIR408b,gma-MIR408d,gma-MIR408c,gma-MIR408a,ptc-MIR408,ath-MIR408,ppt-MIR408b,stu-MIR408b,stu-MIR408a,mdm-MIR408a,mdm-MIR408b,mdm-MIR408d,aly-MIR408,nta-MIR408,mes-MIR408,lus-MIR408a,cme-MIR408,cpa-MIR408,rco-MIR408,csi-MIR408,smo-MIR408,cca-MIR408,pta-MIR408,hbr-MIR408b,hbr-MIR408a,ahy-MIR408,vun-MIR408,dpr-MIR408,osa-MIR408,bdi-MIR408,sbi-MIR408,zma-MIR408b,zma-MIR408a…	stu-MIR408b	ACGGGGACGAGACAGAGCATGagatgtgcaatttttacttgcctattccaTGCACTGCCTCTTCCCTGGCT	stu-miR408b-5p	ACGGGGACGAGACAGAGCATG	5'	Diff	gp2a	...(((..(((((((((((.((((((.(((.(((.(((.((((.(((((......(((((((.......)))))))..))))))))).))).))).))).)))))).))))))))).))..)))...	121	44.9	-56.5	1	13	21	16.5	327.5	181.5	565	13.3867	18.0814	17.7062	424.78	180.572	445.375	middle
100	129	csn-miR408_L-1R+1	TGCACTGCCTCTTCCCTGGCT	21	Sc0000427	-	652484	652610	caaagattgaagaggggagACGGGGACGAGACAGAGCATGagatgggattttaattaacacatagaagttgtgttgttattcttctctTGCACTGCCTCTTCCCTGGCTctcctctctctttctctt	43	vvi-MIR408,mtr-MIR408,gma-MIR408b,gma-MIR408d,gma-MIR408c,gma-MIR408a,ptc-MIR408,ath-MIR408,ppt-MIR408b,stu-MIR408b,stu-MIR408a,mdm-MIR408a,mdm-MIR408b,mdm-MIR408d,aly-MIR408,nta-MIR408,mes-MIR408,lus-MIR408a,cme-MIR408,cpa-MIR408,rco-MIR408,csi-MIR408,smo-MIR408,cca-MIR408,pta-MIR408,hbr-MIR408b,hbr-MIR408a,ahy-MIR408,vun-MIR408,dpr-MIR408,osa-MIR408,bdi-MIR408,sbi-MIR408,zma-MIR408b,zma-MIR408a…	vvi-MIR408	aagaggaagacggggacgaggtagtgcatggatggaactattaacagaagaatgttaagctgtttttgctctacccATGCACTGCCTCTTCCCTGGCtctgtctctc	vvi-miR408	ATGCACTGCCTCTTCCCTGGC	3'	Diff	gp2a	...(((..(((((((((((.((((((.(((.(((.(((.((((.(((((......(((((((.......)))))))..))))))))).))).))).))).)))))).))))))))).))..)))...	121	44.9	-56.5	1	314.5	405	294.5	1878.5	880	6332.5	323.855	348.712	316.028	2436.49	875.502	4991.75	high
101	131	csn-miR477g-p5_2ss1CT22CT	TCCTCAAAGGCTTCCAATATTT	22	Sc0000235	-	688594	688686	atcggtgaagttttcaactgTCCTCAAAGGCTTCCAATATTCccttcaatatggaatgttggatctttgagggtgattgaagactttttcttc	5	vvi-MIR477a,mes-MIR477g,mes-MIR477f,cme-MIR477a,cpa-MIR477,	mes-MIR477g	gacactgacattgctagaatggttagagaagcttccaATCTCCCTCAAAGGCTTCCAatattccaggccatggaaatgttggagacctttggaggggattgaaggcttactctcccatcatttaatgcaagcatagtttc	mes-MIR477g-p5	CCCTCAAAGGCTTCCAatattc	5'	New	gp2a	...(..(((((((((((...((((((((((..(((((((((((.........)))))))))))))))))))))...)))))))))))..)...	87	38.7	-38.6	1.1	4	4	5	2.5	9.5	9	4.11899	3.44407	5.3655	3.2426	9.45144	7.09447	low
102	132	csn-miR477a_L+1_1ss15GA	ACTCTCCCTCAAGGACTTCTG	21	Sc0000422	+	838300	838434	ttcaaggcattggttgctcACTCTCCCTCAAGGACTTCTGaccttgccttggggctaccaacaacctcaagatataggggtacttgtggttgggttagaaggacttgagggagaatgaacaagtcatgtcttatt	15	gma-MIR5036,mdm-MIR477b,nta-MIR477a,mes-MIR477i,mes-MIR477b,mes-MIR477c,mes-MIR477e,mes-MIR477d,mes-MIR477a,mes-MIR477h,csi-MIR477b,csi-MIR473,aqc-MIR477e,aqc-MIR477b,atr-MIR477,	mes-MIR477a	attactcaCTCTCCCTCAAGGGCTTCTGtgagtttctggttgaaataccatacggaggactttagagagagtggataat	mes-miR477a	CTCTCCCTCAAGGGCTTCTG	5'	Diff	gp2a	...((((((.((((((.(((.(((((((((((..(((((((((..(((....)))......(((((.((((.(((....))))))).))))))))))))))..))))))))))).))).))).)))))))))...	129	46.7	-64.8	1	14	19	43	35.5	116	88	14.4165	16.3593	46.1433	46.0449	115.407	69.3681	middle
103	133	csn-miR477a-5p_R+1_3ss1CA20TC21CA	ACTCTCCCTCAAGGGCTTCCAC	22	Sc0001053	+	559498	559602	gaggcaacctttgctcACTCTCCCTCAAGGGCTTCCACcacttggctctccaaaagtcgaaaagggtggaaccctttagggatggtaaacagaagttgttgcgat	8	stu-MIR477a,mdm-MIR477b,mes-MIR477d,mes-MIR477b,mes-MIR477e,aqc-MIR477a,aqc-MIR477e,aqc-MIR477b,	stu-MIR477a	CCTCTCCCTCAAGGGCTTCTCtcctgcatgcttatatgttgggaaaGAAGCTCTAGCAGGGAGAGCCA	stu-miR477a-5p	CCTCTCCCTCAAGGGCTTCTC	5'	Diff	gp2a	...(((((((((....((..(((((.(((((.(((((((..((((((.......))))))....)))))))))))).)))))..)).....))))..)))))...	99	50.5	-42.9	0.8	13	11	9	6	18	33	13.3867	9.4712	9.6579	7.78224	17.908	26.013	middle
104	134	csn-miR477-p5_2ss16GA21TC	CACTCTCCCTCAAAGACTTCCA	22	Sc0001053	+	559690	559800	tcccatgtcagcctctgctCACTCTCCCTCAAAGACTTCCAacatttggctctccaaaagccgaaaggggatggagctctttagggagagtgaacataagttgtcatgatc	27	vvi-MIR477a,gma-MIR5036,ptc-MIR477d,ppt-MIR477d,ppt-MIR477e,ppt-MIR477a,ppt-MIR477c,ppt-MIR477b,ppt-MIR477h,ppt-MIR477f,ppt-MIR477g,stu-MIR477b,mdm-MIR477b,ppe-MIR477,nta-MIR477a,mes-MIR477g,mes-MIR477f,mes-MIR477i,mes-MIR477d,mes-MIR477a,mes-MIR477b,mes-MIR477c,mes-MIR477e,csi-MIR477b,csi-MIR473,aqc-MIR477e,atr-MIR477,	ppe-MIR477	aaggcatttttgttgctcACTCTCCCTCAAAGGCTTCTAGcaatgtcagaaatggcgagctCGAAGCCTTTGGGGAGAGTAAacaaaaaatgtctt	ppe-MIR477-p5	cACTCTCCCTCAAAGGCTTCTA	5'	New	gp2a	...((((.((((...((.(((((((((((.(((((..((((...(((((....)))))..((....))...))))..)))))))))))))))).))...)))).))))...	105	48.6	-47.4	0.9	12	38	36	82.5	271.5	425.5	12.357	32.7187	38.6316	107.006	270.112	335.411	middle
105	135	csn-miR477a_L+1_2ss2AT22AC	ATTCTCCCTCAAAGGCTTCCAC	22	Sc0001053	+	615856	615968	ttctcgaggcaacccttgctcATTCTCCCTCAAAGGCTTCCACcatttggctctccaaaagccaaaaacgggtggaaacctttaggaagaacgaacaaaatttgtcacgatct	6	vvi-MIR477a,ppt-MIR477h,ppt-MIR477f,ppt-MIR477g,mes-MIR477g,mes-MIR477f,	vvi-MIR477a	gaagttgtcaATCTCCCTCAAAGGCTTCCAAttttcctggctgattatcaaggttggaaagttggaagacagtgggggaccttggaagcttacc	vvi-miR477a	ATCTCCCTCAAAGGCTTCCAA	5'	Diff	gp2a	...(((.(((((...(((.((.((((.(((.(((((.(((((((.(((((((.......)))))))....))))))).)))))))).)))).)).)))...))))).)))...	107	46	-42	0.8	12	11.5	7.5	3.5	19	32	12.357	9.90171	8.04825	4.53964	18.9029	25.2248	middle
106	135	csn-miR477a_L+1_2ss2AT22AC	ATTCTCCCTCAAAGGCTTCCAC	22	xpSc0054592	-	63197	63285	cccttgctcATTCTCCCTCAAAGGCTTCCACcatttggctctccaaaagccaaaaaggggtggaaacctttagggagaacgaacaaaag	12	vvi-MIR477a,ptc-MIR477d,ppt-MIR477g,ppt-MIR477h,ppt-MIR477f,ppt-MIR477e,ppt-MIR477a,ppt-MIR477c,ppt-MIR477d,ppt-MIR477b,mes-MIR477g,mes-MIR477f,	vvi-MIR477a	gaagttgtcaATCTCCCTCAAAGGCTTCCAAttttcctggctgattatcaaggttggaaagttggaagacagtgggggaccttggaagcttacc	vvi-miR477a	ATCTCCCTCAAAGGCTTCCAA	5'	Diff	gp2a	...(((.((.((((((((.(((((.(((((((.(((((((.......)))))))....))))))).))))))))))))).)).)))...	83	48.3	-41	1	12	11.5	7.5	3.5	19	32	12.357	9.90171	8.04825	4.53964	18.9029	25.2248	middle
107	136	csn-miR477g-p5_1ss1CT	TCCTCAAAGGCTTCCAATATT	21	Sc0002237	+	9276	9368	tcagagaagtttccaattgTCCTCAAAGGCTTCCAATATTccattcaatgtggaatgttggagcctttgagatcaattgaagacttactcttc	5	vvi-MIR477a,mes-MIR477g,mes-MIR477f,cme-MIR477a,cpa-MIR477,	mes-MIR477g	gacactgacattgctagaatggttagagaagcttccaATCTCCCTCAAAGGCTTCCAatattccaggccatggaaatgttggagacctttggaggggattgaaggcttactctcccatcatttaatgcaagcatagtttc	mes-MIR477g-p5	CCCTCAAAGGCTTCCAatatt	5'	New	gp2a	..((((((((((.((((((..(((((((((.(((((((((((((.....))))))))))))))))))))))..)))))).)))))).))))..	89	38.7	-51.2	1.4	69.5	91.5	52.5	47	141	137	71.5674	78.7832	56.3378	60.9608	140.279	107.994	middle
108	136	csn-miR477g-p5_1ss1CT	TCCTCAAAGGCTTCCAATATT	21	xpSc0055766	+	21266	21375	tgatcagagaagtttctaattgTCCTCAAAGGCTTCCAATATTccaagcattggtcttaacatggaacgttggaagtctttgagggtaattgaaggcttactcttgagtg	4	vvi-MIR477a,mes-MIR477g,mes-MIR477f,cme-MIR477a,	mes-MIR477g	gacactgacattgctagaatggttagagaagcttccaATCTCCCTCAAAGGCTTCCAatattccaggccatggaaatgttggagacctttggaggggattgaaggcttactctcccatcatttaatgcaagcatagtttc	mes-MIR477g-p5	CCCTCAAAGGCTTCCAatatt	5'	New	gp2a	...(((((((((..(..((((..((((((((((((((((..(((((.....((.......)))))))..))))))))))))))))..))))..)..))).)))).))...	104	40	-47.7	1.1	69.5	91.5	52.5	47	141	137	71.5674	78.7832	56.3378	60.9608	140.279	107.994	middle
109	137	csn-miR482a-5p_2ss3AG12AC	GGGATTGGTGGCTTGGAAAGC	21	xfSc0003363	-	351	519	ttgggaagtgatgagaaacgggggatgaatatttgccgaaaatctttgGGGATTGGTGGCTTGGAAAGCttcgttcttttctcttttgaatgaatttaatggcTTTCCAAGTCCACCCATTCCTAttgttttcggtcttctctctcctttctcttctttcgcttcttca	6	stu-MIR482a,ppe-MIR482f,nta-MIR482c,nta-MIR482a,sly-MIR482a,cca-MIR6118,	stu-MIR482a	gagtttttcgaaaatctatgGGAATTGGTGGATTGGAAAGCttttattttcttctgattagcTTTCCAATTCCACCCATTCCTAtggtttttcggtatcctctc	stu-miR482a-5p	GGAATTGGTGGATTGGAAAGC	5'	Diff	gp2a	...((((((((.((((((.((((((.(((.....(((((((((...(((((((.((((((((((((((((((((((...........)))))).......))))))))))).))))).)))))))..))))))))).))))))))).)))))).....))))))))...	163	41.4	-73	1	766	611	602	340	350	594	788.786	526.082	646.006	440.993	348.211	468.235	middle
109	138	csn-miR482a-3p_1ss8TG	TTTCCAAGTCCACCCATTCCTA	22	xfSc0003363	-	351	519	ttgggaagtgatgagaaacgggggatgaatatttgccgaaaatctttgGGGATTGGTGGCTTGGAAAGCttcgttcttttctcttttgaatgaatttaatggcTTTCCAAGTCCACCCATTCCTAttgttttcggtcttctctctcctttctcttctttcgcttcttca	6	stu-MIR482a,ppe-MIR482f,nta-MIR482c,nta-MIR482a,sly-MIR482a,cca-MIR6118,	stu-MIR482a	gagtttttcgaaaatctatgGGAATTGGTGGATTGGAAAGCttttattttcttctgattagcTTTCCAATTCCACCCATTCCTAtggtttttcggtatcctctc	stu-miR482a-3p	TTTCCAATTCCACCCATTCCTA	3'	Diff	gp2a	...((((((((.((((((.((((((.(((.....(((((((((...(((((((.((((((((((((((((((((((...........)))))).......))))))))))).))))).)))))))..))))))))).))))))))).)))))).....))))))))...	163	41.4	-73	1	76720	70192	43855	37797	42824	72896	79002.2	60436.6	47060.8	49024.2	42605.1	57462	high
110	139	csn-miR482-p3_2ss8CT18TA	TTTCCTATTCCTCCCATACCTA	22	xpSc0055987	+	1958	2103	ggaaagtgaaggggagagagagccaacgggagctttgggttgggagtggtaggaaaagcctctgagaaaatggaaaatttggaggaatggctTTTCCTATTCCTCCCATACCTAgggtttccgatcgctcctcccctttccttctc	21	vvi-MIR482,gra-MIR482d,stu-MIR482c,stu-MIR482a,mdm-MIR482b,mdm-MIR482d,ppe-MIR482e,nta-MIR482c,nta-MIR482a,ghr-MIR482a,sly-MIR482e,sly-MIR482d,sly-MIR482a,csi-MIR482a,pab-MIR482b,pab-MIR482c,pta-MIR482c,pde-MIR482a,pde-MIR482b,pgi-MIR2118,bdi-MIR2118a,	vvi-MIR482	aatgtttgggaattggagagtaggaaagcttagccatctattcccttcatggtttcctctccatggattgggggtctagagctagTCTTTCCTACTCCTCCCATTCCtattgttttc	vvi-MIR482-p3	TTTCCTACTCCTCCCATTCCta	3'	New	gp2a	(..(((.(((((((.(((.((((...(((((((..(((((((((((..(((((((((((((((....((((.....))))...)))..))))))))))))..)))))).)))))..)))))))...)))))))))))))))))..)	146	50.7	-79.1	1.1	29056	26297	16917	7734	9010	15290	29920.3	22642.2	18153.6	10031.3	8963.94	12052.7	high
111	140	csn-miR530a_R+1_1ss20TG	TGCATTTGCACCTGCACCTGA	21	Sc0000032	-	1846469	1846614	gaagccaatatgttgcctttatcTGCATTTGCACCTGCACCTGAtatacacaccatctctctctctcgctctctcagagagagagagagaatcatgattcatgatgaggtgcaggttcatatgcaggtgaatgccattttggtata	23	gma-MIR530e,gma-MIR530a,gma-MIR530d,gma-MIR530c,gma-MIR530b,ptc-MIR530a,gra-MIR530b,gra-MIR530a,stu-MIR530,ppe-MIR530,mes-MIR530a,mes-MIR530b,lus-MIR530b,lus-MIR530a,cme-MIR530a,tcc-MIR530b,tcc-MIR530a,csi-MIR530a,htu-MIR530,osa-MIR530,bdi-MIR530b,bdi-MIR530a,tae-MIR530,	ptc-MIR530a	gccaacatgttgcctttatcTGCATTTGCACCTGCACCTTacttgtttctttcttttgtttttgactccaaaaccaaaagtaagtttgaaacattaaaacaagcttgaggtgcaggtgcaggtgcaggtgaatgccatgttggt	ptc-miR530a	TGCATTTGCACCTGCACCTT	5'	Diff	gp2a	...(((((.(((..((.(((((((((((.((.((((((((((.............((((((((((((.((.....)).))))))))))))((((((...)))))).)))))))))).)).))))))))))).))))).)))))...	140	43.8	-70	1.1	42	75	31	110	62	231	43.2494	64.5764	33.2661	142.674	61.6831	182.091	middle
112	141	csn-miR535a_1ss5AG	TGACGACGAGAGAGAGCACGC	21	Sc0003468	+	100967	101093	tcccaagctttgatgcacaattgttTGACGACGAGAGAGAGCACGCtcgtcagcattcatgtgtggacatgattgtatacaagCGTGCTGTCTATCGTCGTCATgatttgcttgtcaaggcttgcct	19	vvi-MIR535a,vvi-MIR535b,vvi-MIR535c,ppt-MIR535d,ppt-MIR535c,ppt-MIR535a,ppt-MIR535b,mdm-MIR535d,mdm-MIR535a,ppe-MIR535b,ppe-MIR535a,mes-MIR535b,mes-MIR535a,cpa-MIR535,rco-MIR535,aqc-MIR535,pab-MIR535,atr-MIR535,osa-MIR535,	vvi-MIR535c	tgtaattgctTGACAACGAGAGAGAGCACGCtagtctgcattcatgcgaggaacatgactgtgtacaggcgtgctctctgtcgctgtcatacaatcttctc	vvi-miR535a	TGACAACGAGAGAGAGCACGC	5'	Diff	gp2a	...((((((((((((((.((((...(((((((((.(((.((((((((.((..(((.((((((....)))))).)))..)).)))))))).))).))))))))).)))))))..)))))))))))...	121	47.2	-63	1.1	780	988	1462	516	943.5	1173.5	803.203	850.686	1568.87	669.272	938.677	925.04	middle
112	142	csn-miR535b-p3_1ss16TC	CGTGCTGTCTATCGTCGTCAT	21	Sc0003468	+	100967	101093	tcccaagctttgatgcacaattgttTGACGACGAGAGAGAGCACGCtcgtcagcattcatgtgtggacatgattgtatacaagCGTGCTGTCTATCGTCGTCATgatttgcttgtcaaggcttgcct	19	vvi-MIR535a,vvi-MIR535b,vvi-MIR535c,ppt-MIR535d,ppt-MIR535c,ppt-MIR535a,ppt-MIR535b,mdm-MIR535d,mdm-MIR535a,ppe-MIR535b,ppe-MIR535a,mes-MIR535b,mes-MIR535a,cpa-MIR535,rco-MIR535,aqc-MIR535,pab-MIR535,atr-MIR535,osa-MIR535,	mes-MIR535b	gctttgacatcattcgtTGACAACGAGAGAGAGCACGGttgtcagcatttcatgcaagggacatgactgtttacaagcgtgctgtctatcgttgtcataagaagtgctcagagc	mes-MIR535b-p3	cgtgctgtctatcgttgtcat	3'	New	gp2a	...((((((((((((((.((((...(((((((((.(((.((((((((.((..(((.((((((....)))))).)))..)).)))))))).))).))))))))).)))))))..)))))))))))...	121	47.2	-63	1.1	5	10.5	25.5	14.5	41	32.5	5.14874	9.04069	27.3641	18.8071	40.7904	25.6189	middle
113	143	csn-miR535d_L+1R-1	TTGACGACGAGAGAGAGCACG	21	Sc0003602	+	110353	110480	ccaaagccttgacttatgattgcTTGACGATGAGAGAGAGCACGcttgtcatcattcatgcatggggcatgattatatacaggaGTGCTCTCTATCGTCGTCATGctatttgcttgttaggacttact	3	mdm-MIR535d,ppe-MIR535b,mes-MIR535b,	mdm-MIR535d	gatgttgtgTGACGACGAGAGAGAGCACGCttgtcatcacccatgaaaggatcatggttgtttacgggcgtgctctttcttgttgtcataaagtc	mdm-miR535d	TGACGACGAGAGAGAGCACGC	5'	Diff	gp2a	...(((.((((((....(((.((.(((((((((.(((((((((.(((((......((((((.....))))))......))))).))))))))).))))))))).)).))).....)))))).)))...	122	43.8	-56.1	1	20.5	26	36.5	10	19	25	21.1098	22.3865	39.1682	12.9704	18.9029	19.7069	middle
113	144	csn-miR535b-p3_2ss15TC21AG	GTGCTGTCTATCGTCGTCATG	21	Sc0003602	+	110353	110480	ccaaagccttgacttatgattgcTTGACGATGAGAGAGAGCACGcttgtcatcattcatgcatggggcatgattatatacaggaGTGCTCTCTATCGTCGTCATGctatttgcttgttaggacttact	3	mdm-MIR535d,ppe-MIR535b,mes-MIR535b,	mes-MIR535b	gctttgacatcattcgtTGACAACGAGAGAGAGCACGGttgtcagcatttcatgcaagggacatgactgtttacaagcgtgctgtctatcgttgtcataagaagtgctcagagc	mes-MIR535b-p3	gtgctgtctatcgttgtcata	3'	New	gp2a	...(((.((((((....(((.((.(((((((((.(((((((((.(((((......((((((.....))))))......))))).))))))))).))))))))).)).))).....)))))).)))...	122	43.8	-56.1	1	2	6.5	14.5	4.5	15	7.5	2.05949	5.59662	15.56	5.83668	14.9233	5.91206	middle
114	145	csn-miR535a	TGACAACGAGAGAGAGCACGC	21	Sc0003602	+	158586	158669	ccTGACAACGAGAGAGAGCACGCtagtctgcattcatgcatcgagcatgactgtttacaagcGTGCTCTCTCTCGTTGTCATAg	23	vvi-MIR535c,vvi-MIR535a,vvi-MIR535b,ppt-MIR535d,ppt-MIR535c,ppt-MIR535b,ppt-MIR535a,mdm-MIR535a,mdm-MIR535c,mdm-MIR535b,mdm-MIR535d,ppe-MIR535a,ppe-MIR535b,mes-MIR535b,mes-MIR535a,tcc-MIR535,cpa-MIR535,rco-MIR535,csi-MIR535,aqc-MIR535,pab-MIR535,atr-MIR535,osa-MIR535,	vvi-MIR535a	tgtaattgctTGACAACGAGAGAGAGCACGCtagtcagcattcatgcgaggaacatgactgtgtacaggcgtgctctctctcgctgtcatacaatcttctc	vvi-miR535a	TGACAACGAGAGAGAGCACGC	5'	Yes	gp2a	..((((((((((((((((((((((.((..(((.((((((.....)))))).)))..)).))))))))))))))))))))))...	79	50	-57.6	1.4	17709	23302.5	27746.5	28942.5	40722.5	52949.5	18235.8	20063.9	29774.8	37539.6	40514.3	41738.7	high
114	146	csn-miR535a-p3_1ss14CT	GTGCTCTCTCTCGTTGTCATA	21	Sc0003602	+	158586	158669	ccTGACAACGAGAGAGAGCACGCtagtctgcattcatgcatcgagcatgactgtttacaagcGTGCTCTCTCTCGTTGTCATAg	23	vvi-MIR535c,vvi-MIR535a,vvi-MIR535b,ppt-MIR535d,ppt-MIR535c,ppt-MIR535b,ppt-MIR535a,mdm-MIR535a,mdm-MIR535c,mdm-MIR535b,mdm-MIR535d,ppe-MIR535a,ppe-MIR535b,mes-MIR535b,mes-MIR535a,tcc-MIR535,cpa-MIR535,rco-MIR535,csi-MIR535,aqc-MIR535,pab-MIR535,atr-MIR535,osa-MIR535,	vvi-MIR535a	tgtaattgctTGACAACGAGAGAGAGCACGCtagtcagcattcatgcgaggaacatgactgtgtacaggcgtgctctctctcgctgtcatacaatcttctc	vvi-MIR535a-p3	gtgctctctctcgctgtcata	3'	New	gp2a	..((((((((((((((((((((((.((..(((.((((((.....)))))).)))..)).))))))))))))))))))))))...	79	50	-57.6	1.4	107.5	185	233	133	313.5	359.5	110.698	159.288	250.032	172.506	311.898	283.385	middle
115	145	csn-miR535a	TGACAACGAGAGAGAGCACGC	21	Sc0003602	-	158643	158727	ctaTGACAACGAGAGAGAGCACGCttgtaaacagtcatgctcgatgcatgaatgcagaCTAGCGTGCTCTCTCTCGTTGtcaggc	23	vvi-MIR535c,vvi-MIR535a,vvi-MIR535b,ppt-MIR535d,ppt-MIR535c,ppt-MIR535b,ppt-MIR535a,mdm-MIR535a,mdm-MIR535c,mdm-MIR535b,mdm-MIR535d,ppe-MIR535a,ppe-MIR535b,mes-MIR535b,mes-MIR535a,tcc-MIR535,cpa-MIR535,rco-MIR535,csi-MIR535,aqc-MIR535,pab-MIR535,atr-MIR535,osa-MIR535,	vvi-MIR535a	tgtaattgctTGACAACGAGAGAGAGCACGCtagtcagcattcatgcgaggaacatgactgtgtacaggcgtgctctctctcgctgtcatacaatcttctc	vvi-miR535a	TGACAACGAGAGAGAGCACGC	5'	Yes	gp2a	...((((((((((((((((((((((.((...((.((((((.....)))))).))...)).))))))))))))))))))))))...	79	50.6	-55.6	1.3	17709	23302.5	27746.5	28942.5	40722.5	52949.5	18235.8	20063.9	29774.8	37539.6	40514.3	41738.7	high
115	147	csn-miR535-p3_1ss2GA	CAAGCGTGCTCTCTCTCGTTG	21	Sc0003602	-	158643	158727	ctaTGACAACGAGAGAGAGCACGCttgtaaacagtcatgctcgatgcatgaatgcagaCTAGCGTGCTCTCTCTCGTTGtcaggc	23	vvi-MIR535c,vvi-MIR535a,vvi-MIR535b,ppt-MIR535d,ppt-MIR535c,ppt-MIR535b,ppt-MIR535a,mdm-MIR535a,mdm-MIR535c,mdm-MIR535b,mdm-MIR535d,ppe-MIR535a,ppe-MIR535b,mes-MIR535b,mes-MIR535a,tcc-MIR535,cpa-MIR535,rco-MIR535,csi-MIR535,aqc-MIR535,pab-MIR535,atr-MIR535,osa-MIR535,	tcc-MIR535	acagctttgtacatatcataTGACAACGATAGAGAGCACGCttgtacacatccatgtccttgcaagaatgccaacgagcgtgctctctctcgttgtcaattgataatgtgtcaaatctca	tcc-MIR535-p3	cgagcgtgctctctctcgttg	3'	New	gp2a	...((((((((((((((((((((((.((...((.((((((.....)))))).))...)).))))))))))))))))))))))...	79	50.6	-55.6	1.3	3.5	3	5	7	9.5	16.5	3.60411	2.58306	5.3655	9.07927	9.45144	13.0065	middle
116	148	csn-miR828a	TCTTGCTCAAATGAGTATTCCA	22	Sc0001077	+	247570	247719	attcctctcctggcaaggccTCTTGCTCAAATGAGTATTCCAcaaattcatctgggaaagccgcaaatttcctttctgaagttattggattggttcttccaatgttgcttgaaatactcatctgggcaagatgctttgcatgggaggctt	13	vvi-MIR828a,gma-MIR828b,gma-MIR828a,ptc-MIR828b,ptc-MIR828a,mdm-MIR828b,mdm-MIR828a,ppe-MIR828,mes-MIR828a,mes-MIR828b,cme-MIR828,ssl-MIR828,atr-MIR828,	vvi-MIR828a	tataaagttTCTTGCTCAAATGAGTATTCCAaacaacagcttgtgaagcaatgattactgtcatagtctctgcatgtggattgttgttgagatgctcatttgaggaagcaaccttaaaaatg	vvi-miR828a	TCTTGCTCAAATGAGTATTCCA	5'	Yes	gp2a	...((((((...(((((((.(((((((((.(((((((((.((....((((...((((((........))))))...))))..(((((((........))))))).....)).))))))))).))))))))).)))))))..))))))...	144	43.3	-61.5	0.9	120	81	67	66	135	177	123.57	69.7425	71.8977	85.6046	134.31	139.525	middle
117	149	csn-miR1446_R-1_2ss5CT20GC	TGAATTCTCTCCCTCAATGCC	21	xpSc0055766	+	22265	22424	atttggaccattttgaaggtttttgagatccaactttcttTGAATTCTCTCCCTCAATGCCtactcttagctcaacaatcctgtttggaagcttttgaggagccgttgaggggtgagagttcaaaaaaatgttagatttctatatcagtttggtttattc	1	nta-MIR1446,	nta-MIR1446	cagcgttttcTGAACTCTCTCCCTCAATGGCTgctcatatatatatagccatgcttcttaattaattaaagaacagccatgagagattgagttcagaaaactctggc	nta-miR1446	TGAACTCTCTCCCTCAATGGCT	5'	Diff	gp2a	.....(((((..((((........((((((.((((((.(((((((((((((((((((((.((.(((..((((...(((......)))..))))...))).)).)))))))))).))))))))))).))).))).))))))....))))..))))).....	150	37.5	-58.2	1	13	23	13	12	27	54	13.3867	19.8034	13.9503	15.5645	26.862	42.5668	middle
118	150	csn-miR2111-5p_2ss19CT21AG	TAATCTGCATCCTGAGGTTTG	21	Sc0005355	-	21841	21934	atgtcaagaccgggTAATCTGCATCCTGAGGTTTGgatatacatatttattgtatgatctaGTCCTCGGGTTGCAGATTACCtcttcttgatca	45	vvi-MIR2111,mtr-MIR2111j,mtr-MIR2111k,mtr-MIR2111d,mtr-MIR2111f,mtr-MIR2111e,mtr-MIR2111a,mtr-MIR2111b,mtr-MIR2111i,mtr-MIR2111c,mtr-MIR2111n,mtr-MIR2111h,mtr-MIR2111o,mtr-MIR2111m,mtr-MIR2111g,gma-MIR2111e,gma-MIR2111b,gma-MIR2111d,gma-MIR2111c,gma-MIR2111a,gma-MIR2111f,ptc-MIR2111a,ptc-MIR2111b,ath-MIR2111b,ath-MIR2111a,mdm-MIR2111b,mdm-MIR2111a,aly-MIR2111b,aly-MIR2111a,aly-MIR2111c,ppe-MIR211…	vvi-MIR2111	gcaatattgggtcaggatcgggTAATCTGCATCCTGAGGTCTAgataagtatatctccgttgcagctaGTCCTCTGGTTGCAGATTACTtcttcctcactgccaatgc	vvi-miR2111-5p	TAATCTGCATCCTGAGGTCTA	5'	Diff	gp2a	..(((((((..((((((((((((.(((((((..((((((((((.......))))).)))))..))))))).))))))))))))..)))))))..	90	40.4	-49.9	1.3	58	124	130	81	236	121	59.7253	106.766	139.503	105.06	234.794	95.3812	middle
118	151	csn-miR2111-3p_2ss7TG21TC	GTCCTCGGGTTGCAGATTACC	21	Sc0005355	-	21841	21934	atgtcaagaccgggTAATCTGCATCCTGAGGTTTGgatatacatatttattgtatgatctaGTCCTCGGGTTGCAGATTACCtcttcttgatca	45	vvi-MIR2111,mtr-MIR2111j,mtr-MIR2111k,mtr-MIR2111d,mtr-MIR2111f,mtr-MIR2111e,mtr-MIR2111a,mtr-MIR2111b,mtr-MIR2111i,mtr-MIR2111c,mtr-MIR2111n,mtr-MIR2111h,mtr-MIR2111o,mtr-MIR2111m,mtr-MIR2111g,gma-MIR2111e,gma-MIR2111b,gma-MIR2111d,gma-MIR2111c,gma-MIR2111a,gma-MIR2111f,ptc-MIR2111a,ptc-MIR2111b,ath-MIR2111b,ath-MIR2111a,mdm-MIR2111b,mdm-MIR2111a,aly-MIR2111b,aly-MIR2111a,aly-MIR2111c,ppe-MIR211…	vvi-MIR2111	gcaatattgggtcaggatcgggTAATCTGCATCCTGAGGTCTAgataagtatatctccgttgcagctaGTCCTCTGGTTGCAGATTACTtcttcctcactgccaatgc	vvi-miR2111-3p	GTCCTCTGGTTGCAGATTACT	3'	Diff	gp2a	..(((((((..((((((((((((.(((((((..((((((((((.......))))).)))))..))))))).))))))))))))..)))))))..	90	40.4	-49.9	1.3	7	12	11	54	156	84	7.20823	10.3322	11.8041	70.0401	155.203	66.215	middle
119	152	csn-miR3627a-p5_2ss7TA18TC	TGTCGCAGGAAAGATGGCACC	21	Sc0005276	-	58019	58191	aaaggaggaaaagaaagaaagaaaggagtggaaggggctctTGTCGCAGGAAAGATGGCACCtgctttgtgattttacccttcccaaaataaaggaagcgaagcaagcgccatcttctcctgtgacacgacaccctccaacttctttgctatttacatgcttctttctccatt	3	ptc-MIR3627a,ptc-MIR3627b,cpa-MIR5211,	ptc-MIR3627a	ggtttggggaggggagtTCTGTCGCTGGAAAGATGGTACctagggctgcatattaatgtgtatagcaagcaataggcaccatcttcccgcgacggaactcccctctaacctctacc	ptc-MIR3627a-p5	TGTCGCTGGAAAGATGGTACc	5'	New	gp2a	...((((((((((..(((.((((((((((((.((((..((.((((((((((((((((((...(((((((..........(((((.........))))))))))))...)))))))).)))))))))).))..))))))).))))))).)).))).....))).)))))))...	167	45.1	-71.1	0.9	58.5	89.5	159.5	166	194.5	473.5	60.2402	77.0611	171.159	215.309	193.506	373.248	middle
120	152	csn-miR3627a-p5_2ss7TA18TC	TGTCGCAGGAAAGATGGCACC	21	xfSc0003501	-	17094	17281	gtggaagtcatggagaacacaattagctagaaagagagtgataaacaagttgagggagtttTGTCGCAGGAAAGATGGCACCggatttgctctatgccaaaattaatccggtactctttcctgcgaccagacaaccatcaacttctcttccgcttacattctgtgcttcatccataggtaatttcaca	3	ptc-MIR3627a,ptc-MIR3627b,cpa-MIR5211,	ptc-MIR3627a	ggtttggggaggggagtTCTGTCGCTGGAAAGATGGTACctagggctgcatattaatgtgtatagcaagcaataggcaccatcttcccgcgacggaactcccctctaacctctacc	ptc-MIR3627a-p5	TGTCGCTGGAAAGATGGTACc	5'	New	gp2a	((((((...((((((((((((...(((....((((((..........((((((((..((((.(((((((((((((..(.((((((((.((.....)).......)))))))).)))))))))))))).))))..)).))))))))))))..))).......)))).))).)))))......)))))).	187	43.1	-67.6	0.8	58.5	89.5	159.5	166	194.5	473.5	60.2402	77.0611	171.159	215.309	193.506	373.248	middle
121	153	csn-miR5083_L-1	GACTACAATTATCTGATCA	19	Sc0000141	-	216612	216726	aattgattttataattctagcaatacgatttaatcacatttgtcttgaaaaaatacatgtcaatttttcaggacaaatgagataaaattctatGACTACAATTATCAGATCActc	1	osa-MIR5083,	osa-MIR5083	tcctggcagttcttcagataatcagatttgtccatgaggtttcaactgttgcattccattgttgagttttattctgtttgcgtttctgtttgtttttgtcatggatctggctgattggaggctgtgatgaccaaaaaatacctacctattttctgagggattccagtccttctgattgatagaaaccaatggatccttctgagcctgccaagatcttcagattcttagttttgtattcggctttttcgatttgtcttcgtatattgcattcttctaaaagcaagcaagattcgtaacagttgatgggatgataacctttcacagaaactgtatgtgttgacccaaaattcAGACTACAATTATCTGATCAactcagacat	osa-miR5083	AGACTACAATTATCTGATCA	3'	Diff	gp2a	...((((((.((((((.(((..(((..((((.(((.((((((((((((((((...........)))))))))))))))).))).))))..)))..))).)))))).))))))...	109	25.2	-34.4	1.2	3	7	0	7	12	23	3.08924	6.02713	0	9.07927	11.9387	18.1303	middle
122	154	csn-miR5083_R-1	AGACTACAATTATCTGATC	19	xpSc0053378	-	221182	221324	caatccgataatcgtaacctattcaatttatagcatgtcttaaaaaataaaaaaaaatagcaagtgtgtttttaaaaaatgaccattcatttgtttggtaataaacacaataaattgaatAGACTACAATTATCTGATTgatt	1	osa-MIR5083,	osa-MIR5083	tcctggcagttcttcagataatcagatttgtccatgaggtttcaactgttgcattccattgttgagttttattctgtttgcgtttctgtttgtttttgtcatggatctggctgattggaggctgtgatgaccaaaaaatacctacctattttctgagggattccagtccttctgattgatagaaaccaatggatccttctgagcctgccaagatcttcagattcttagttttgtattcggctttttcgatttgtcttcgtatattgcattcttctaaaagcaagcaagattcgtaacagttgatgggatgataacctttcacagaaactgtatgtgttgacccaaaattcAGACTACAATTATCTGATCAactcagacat	osa-miR5083	AGACTACAATTATCTGATCA	3'	Diff	gp2a	(((((.((((((.(((..(((((((((((((.((.........................))...((((((((((..((((((....))))))......))).))))))))))))))))))))..))).)))))).)))))...	140	23.8	-33.4	1	0	0	0	6	7	6	0	0	0	7.78224	6.96422	4.72964	low
123	155	csn-miR5175-p5_1ss4CT	TCCTTCTGTTCCAAATTACTC	21	xfSc0001597	-	51927	52103	atatgagcaaagatttcctatctctaaatattctttTCCTTCTGTTCCAAATTACTCataaccattggagcatatgagaatctcaagatttgataatctcaatatatatccaatggttgtgagtgatttgggataggaggagaagaatatttggggacaggagatctttaggcttaa	1	tae-MIR5175,	tae-MIR5175	actccctctgTTCCAAATTACTCGTCGTGGTtttagtccaanttgnactnaaaccatgacgagtaatttggaacggagggagta	tae-MIR5175-p5	tccctctgTTCCAAATTACTC	5'	New	gp2a	...((((((((((((((((.(((((((((((((((((((((((((((((((((((((((((((((((((..((((((((...((((...))))...)))).))))...))))))))))))))))))))))))))))))))))))))))))))))))).)))))))))))..))))).	173	33.9	-102.7	1.7	0	2.5	3	3	3.5	10.5	0	2.15255	3.2193	3.89112	3.48211	8.27688	low
124	155	csn-miR5175-p5_1ss4CT	TCCTTCTGTTCCAAATTACTC	21	xfSc0001597	-	53067	53204	tctccaaatattcctgTCCTTCTGTTTCAAATTACTCataatcattggattatatgagaatcttaagatttgataatctcaagacatatccaatggttgtgagtgatttgagataaggggacaagaatatttagggac	1	tae-MIR5175,	tae-MIR5175	actccctctgTTCCAAATTACTCGTCGTGGTtttagtccaanttgnactnaaaccatgacgagtaatttggaacggagggagta	tae-MIR5175-p5	tccctctgTTCCAAATTACTC	5'	New	gp2a	((((.((((((((.((((((..(((((((((((((((((((((((((((...((((....((((.(((((....))))).)))))))))))))))))))))))))))))))))))..)))))).)))))))).)))).	137	32.6	-67.2	1.5	0	2.5	3	3	3.5	10.5	0	2.15255	3.2193	3.89112	3.48211	8.27688	low
125	156	csn-miR5225a-p5_2ss7GA19CT	TCGCAGAAGAGATGACACTT	20	xfSc0000062	-	392161	392252	gttgtgggactctctTCGCAGAAGAGATGACACTTggtttgggatagcaacgtgaaccaagtgtcaatcttctgcgatgagatacccacttc	3	mtr-MIR5225a,mtr-MIR5225b,mtr-MIR5225c,	mtr-MIR5225a	tacacggactTCAGTCGCAGGAGAGATGACACcttctgtttctaatggcatggttgcaaccaattttaacaggagttgtcatctttcttcgactgaagtccatatgcat	mtr-MIR5225a-p5	TCGCAGGAGAGATGACACct	5'	New	gp2a	...(((((..((((.((((((((((..(((((((((((((.............))))))))))))).)))))))))).))))..)))))...	86	47.8	-50.9	1.2	0	0	0	10	9	3	0	0	0	12.9704	8.954	2.36482	middle
126	157	csn-miR6149a-p5_2ss18CT21TA	ATACGCACCTGAATCGGTAGA	21	xfSc0028803	-	621	781	gtacaatcctaagttcattttgtgcgtcaaagcttgcATACGCACCTGAATCGGTAGAtagagaaagatatcaacaactctatgtatgttactctttatatgtgccgatttgggttcgtatgcatgccctggcgcactgaaaaaccaacttagcagtgatt	2	nta-MIR6149a,nta-MIR6149b,	nta-MIR6149a	atgtcaaagcTTGATACGCACCTGAATCGGCagttacatacagaccaatagtatattagtacatatgccggtttgggttcgtatcaaactatgatatac	nta-MIR6149a-p5	ATACGCACCTGAATCGGCagt	5'	New	gp2a	...((...(((((((..((((((((((((..((.((((((((.(((..((((((((.(((((((..(((((..(((......))))))))..))))..))).))))))))..))).)))))))).))..))))))))...))))..)))))))...))...	155	41	-62.8	1	3287	5835	3242	1218	1696	1415	3384.78	5024.04	3478.99	1579.79	1687.33	1115.41	high
127	158	csn-miR7122a_2ss4TA21CG	TTAAACAGAGAAATCACGGTGG	22	Sc0007942	-	1303	1442	tatgatccatttcattggtTTAAACAGAGAAATCACGGTGGagactctgattgattgattgagtaagcaagatcagtcctttctctctctctttctctctctaccgtgtttctctgtataaagtgatgaactgggtcttg	2	mdm-MIR7122a,mdm-MIR7122b,	mdm-MIR7122a	gggttcattccattcttTTATACAGAGAAATCACGGTCGagatcaaaactcagaagtctgtcagattctctctctccgtcgtctcaaccgtgtttttctgtataaagagatgtactggatcc	mdm-miR7122a	TTATACAGAGAAATCACGGTCG	5'	Diff	gp2a	...((((((.((((((..((((.(((((((((.(((((((((((....((..((..((..(((...((.......))...)))..))..))..))..)))))))))))))))))))).))))..)))))).))))))...	134	39.3	-54.3	1	312	415	226	189	187	319	321.281	357.323	242.521	245.14	186.044	251.459	middle
128	159	csn-miR8016_1ss12GA	ATTTTTGAATGAAAGGCCCATGTG	24	Sc0005121	+	87232	87382	aaagagaaaaataatccatggtctcagttcatatggtccttttatttaaaaatatatgatgtatggattgcgaataatgacagtgcctatacttcatatATTTTTGAATGAAAGGCCCATGTGtgttgcaaccatagaattttttctccca	1	stu-MIR8016,	stu-MIR8016	catggtcttttctttcaaaaatatattatattaggagttgctatatATTTTTGAATGGAAGGCCCATGTG	stu-miR8016	ATTTTTGAATGGAAGGCCCATGTG	3'	Diff	gp2a	...((((((((...((.(((((..(((..(((((((.((((((((((((((((((((((.((((((((((((.....)).)))).)).)))).)))))))))))))))))))))).)))))))..)))..))))).))..))))))))...	145	31.8	-60.6	1.3	13	21	7	0	0	0	13.3867	18.0814	7.5117	0	0	0	middle
1	1	csn-miR156d-p5_2ss2AG21AT	CGATTCCTCTATCTTTCTTTT	21	Sc0000733	-	22640	22752	CGATTCCTCTCTCTTTCTTTTgccatcaaatctacggggaagacctgtttgttcaaataagaacatatgtaatattactgttcacaaatgaatagtgataataagtgtaaata	1	sly-MIR156d,	sly-MIR156d	cagatgcctaaaaagggtaaaaacaaaggggcggTGACAGAAGAGAGTGAGCACacatggcgttttctggcatgatgtttatatatatatatgcttgaaactatgtgtGCTCACTGCTCTATCTGTCACCtcccaccaattcctctatctttctttatatgtatctg	sly-MIR156d-p5	caattcctctatctttcttta	5'	New	gp2b	..................(((((..........(((((.....))))).(((((......))))).......((((((((((((....))))))))))))......)))))..	93	31.9	-22.6	0.6	0	3.5	1.5	2.5	2.5	1.5	0	3.01356	1.60965	3.2426	2.48722	1.18241	low
2	1	csn-miR156d-p5_2ss2AG21AT	CGATTCCTCTATCTTTCTTTT	21	Sc0000733	-	64421	64492	gatcgggtttgcctttggtacgCGATTCCTCTCTCTTTCTTTTgccatcaaatctaccgggaagacctgttt	1	sly-MIR156d,	sly-MIR156d	cagatgcctaaaaagggtaaaaacaaaggggcggTGACAGAAGAGAGTGAGCACacatggcgttttctggcatgatgtttatatatatatatgcttgaaactatgtgtGCTCACTGCTCTATCTGTCACCtcccaccaattcctctatctttctttatatgtatctg	sly-MIR156d-p5	caattcctctatctttcttta	5'	New	gp2b	...(((((((.(((..((((.((((................)))).........))))))).)))))))...	66	47.2	-13.4	0.4	0	3.5	1.5	2.5	2.5	1.5	0	3.01356	1.60965	3.2426	2.48722	1.18241	low
3	2	csn-miR156a-p3_1ss22CT	TGCTCACTTCTCTTCTGTCATT	22	Sc0001637	-	321494	321624	ctcgttctgggtctctgcttgaaaaaactgacagaagagagtgagcacacagaggctaattggtataagtctatgccattgcttttgcgTGCTCACTTCTCTTCTGTCATTttgctctctcccggaatttg	4	ptc-MIR156f,lus-MIR156a,tcc-MIR156c,ghr-MIR156d,	lus-MIR156a	agagagagataatgggaggaggaggaggtgaggagggtgatagacTGACAGAAGAGAGTGAGCACacaaacaggcaattgtatggatggagtacctttgcggggtgcgtgctcacttctcttctgtcatctcaaattgatcttatctcctcctcctcctcctttgatcttatctcctctct	lus-MIR156a-p3	tgctcacttctcttctgtcatc	3'	New	gp2b	...((((((((.....((..((......((((((((((((((((((((.(((((((....(((((((....)))))))..))))))).)))))))).))))))))))))))..)).....))))))))...	125	45	-65.2	1.1	35	34	43	76	75	177	36.0411	29.2746	46.1433	98.575	74.6166	139.525	middle
4	3	csn-miR159-p5_1ss10GT	AGCTGCTGATCTATGGATCCC	21	Sc0001052	+	623516	623658	gAGCTGCTGACCTATGGATCCCtcattcctatccaatctttgtttgttttggtttactaattggatagatttgtggcttgcatatgtcacgagctgcattaaccctaagttggatcttgtTTTGGATTGAAGGGAGCTCTaca	81	vvi-MIR159c,mtr-MIR159a,gma-MIR159e,gma-MIR159a,ptc-MIR159b,ptc-MIR159a,ptc-MIR159d,ptc-MIR159c,ath-MIR159a,ath-MIR159b,ath-MIR159c,mdm-MIR159a,mdm-MIR159c,mdm-MIR159b,aly-MIR159a,aly-MIR159b,aly-MIR159c,ppe-MIR159,nta-MIR159,mes-MIR159b,mes-MIR159a,mes-MIR159d,mes-MIR159c,lus-MIR159c,lus-MIR159b,lus-MIR159a,cme-MIR159a,cme-MIR159b,bra-MIR159a,bra-MIR319,bna-MIR159,cpa-MIR159a,cpa-MIR159b,sly-MIR…	ppe-MIR159	ggagcagagctccttgaagtccaatagaaggtcttgctgggtggattgagctgctgagctatggatcccacagccctatctcagatcatcagaggaataggcttgtggcttgcatatctcaggagctgcattacctgtgttagatctttgTTTGGATTGAAGGGAGCTCTAcacc	ppe-MIR159-p5	agctgctgagctatggatccc	5'	New	gp2b	(((((.((..((...((((((.......(((((((((....((............))..)))))))))...((..(((((.........)))))..)).............))))))......))......)).)))))....	139	41.3	-36.8	0.6	436.5	755.5	589	405.5	724	923.5	449.485	650.499	632.056	525.949	720.299	727.971	middle
4	4	csn-miR159c_R-1	TTTGGATTGAAGGGAGCTCT	20	Sc0001052	+	623516	623658	gAGCTGCTGACCTATGGATCCCtcattcctatccaatctttgtttgttttggtttactaattggatagatttgtggcttgcatatgtcacgagctgcattaaccctaagttggatcttgtTTTGGATTGAAGGGAGCTCTaca	81	vvi-MIR159c,mtr-MIR159a,gma-MIR159e,gma-MIR159a,ptc-MIR159b,ptc-MIR159a,ptc-MIR159d,ptc-MIR159c,ath-MIR159a,ath-MIR159b,ath-MIR159c,mdm-MIR159a,mdm-MIR159c,mdm-MIR159b,aly-MIR159a,aly-MIR159b,aly-MIR159c,ppe-MIR159,nta-MIR159,mes-MIR159b,mes-MIR159a,mes-MIR159d,mes-MIR159c,lus-MIR159c,lus-MIR159b,lus-MIR159a,cme-MIR159a,cme-MIR159b,bra-MIR159a,bra-MIR319,bna-MIR159,cpa-MIR159a,cpa-MIR159b,sly-MIR…	vvi-MIR159c	ttttggagtggagctccttgaagtccaatagagggtcttactgggtagattgagctgctgacttatggatcccacagccctatcccgtcaatggggggcattggataggcttgtggcttgcatatctcaggagctgcattatccaagtttagatccttgTTTGGATTGAAGGGAGCTCTAcacctctctc	vvi-miR159c	TTTGGATTGAAGGGAGCTCTA	3'	Diff	gp2b	(((((.((..((...((((((.......(((((((((....((............))..)))))))))...((..(((((.........)))))..)).............))))))......))......)).)))))....	139	41.3	-36.8	0.6	6140.5	11620	11945	6365	7627.5	6208.5	6323.16	10005	12818.2	8255.65	7588.51	4894	high
5	3	csn-miR159-p5_1ss10GT	AGCTGCTGATCTATGGATCCC	21	xfSc0011266	+	740	888	tgAGCTGCTGATCTATGGATCCCtcagttctatccatccatttctttgaaagtggataggcttgtggcttccatatgtcaggagctgcattacctaagttagatccttgTTTGGATTGAAGGGAGCTCTAcaccacacgtctctctcag	76	vvi-MIR159c,mtr-MIR159a,gma-MIR159e,gma-MIR159a,ptc-MIR159b,ptc-MIR159a,ptc-MIR159d,ath-MIR159a,ath-MIR159b,ath-MIR159c,mdm-MIR159a,mdm-MIR159c,mdm-MIR159b,aly-MIR159a,aly-MIR159b,aly-MIR159c,ppe-MIR159,nta-MIR159,mes-MIR159b,mes-MIR159a,lus-MIR159c,lus-MIR159b,cme-MIR159a,cme-MIR159b,bra-MIR159a,bra-MIR319,bna-MIR159,cpa-MIR159a,cpa-MIR159b,sly-MIR159,rco-MIR159,csi-MIR159,smo-MIR159,cca-MIR319,…	ppe-MIR159	ggagcagagctccttgaagtccaatagaaggtcttgctgggtggattgagctgctgagctatggatcccacagccctatctcagatcatcagaggaataggcttgtggcttgcatatctcaggagctgcattacctgtgttagatctttgTTTGGATTGAAGGGAGCTCTAcacc	ppe-MIR159-p5	agctgctgagctatggatccc	5'	New	gp2b	((((((.((((..((((((..((.(((..((((((((.((......))...))))))))..))).))..))))))..)))).)))).))............(((((......)))))..(((((((............).))))))...	89	45.6	-48.3	0.7	436.5	755.5	589	405.5	724	923.5	449.485	650.499	632.056	525.949	720.299	727.971	middle
5	5	csn-miR159c	TTTGGATTGAAGGGAGCTCTA	21	xfSc0011266	+	740	888	tgAGCTGCTGATCTATGGATCCCtcagttctatccatccatttctttgaaagtggataggcttgtggcttccatatgtcaggagctgcattacctaagttagatccttgTTTGGATTGAAGGGAGCTCTAcaccacacgtctctctcag	76	vvi-MIR159c,mtr-MIR159a,gma-MIR159e,gma-MIR159a,ptc-MIR159b,ptc-MIR159a,ptc-MIR159d,ath-MIR159a,ath-MIR159b,ath-MIR159c,mdm-MIR159a,mdm-MIR159c,mdm-MIR159b,aly-MIR159a,aly-MIR159b,aly-MIR159c,ppe-MIR159,nta-MIR159,mes-MIR159b,mes-MIR159a,lus-MIR159c,lus-MIR159b,cme-MIR159a,cme-MIR159b,bra-MIR159a,bra-MIR319,bna-MIR159,cpa-MIR159a,cpa-MIR159b,sly-MIR159,rco-MIR159,csi-MIR159,smo-MIR159,cca-MIR319,…	vvi-MIR159c	ttttggagtggagctccttgaagtccaatagagggtcttactgggtagattgagctgctgacttatggatcccacagccctatcccgtcaatggggggcattggataggcttgtggcttgcatatctcaggagctgcattatccaagtttagatccttgTTTGGATTGAAGGGAGCTCTAcacctctctc	vvi-miR159c	TTTGGATTGAAGGGAGCTCTA	3'	Yes	gp2b	((((((.((((..((((((..((.(((..((((((((.((......))...))))))))..))).))..))))))..)))).)))).))............(((((......)))))..(((((((............).))))))...	89	45.6	-48.3	0.7	29969.5	46526.5	41773.5	17936.5	22741.5	22301.5	30861	40060.2	44827.1	23264.3	22625.3	17579.7	high
6	6	csn-miR159b-p5_1ss10GT	AGCTGCTGATCTATGGATCCCT	22	Sc0004726	+	58384	58527	gAGCTGCTGACCTATGGATCCCTcattcctatccaatctttgtttgttttggtttactaattggatagatttgtggcttgcatatgtcacgagctgcattaaccctaagttggatcttgtTTTGGATTGAAGGGAGCTCTAcat	77	vvi-MIR159c,mtr-MIR159a,gma-MIR159e,gma-MIR159a,ptc-MIR159b,ptc-MIR159a,ptc-MIR159d,ptc-MIR159c,ath-MIR159a,ath-MIR159b,ath-MIR159c,mdm-MIR159a,mdm-MIR159c,mdm-MIR159b,aly-MIR159a,aly-MIR159b,aly-MIR159c,ppe-MIR159,nta-MIR159,mes-MIR159b,mes-MIR159a,mes-MIR159d,mes-MIR159c,lus-MIR159c,lus-MIR159b,lus-MIR159a,cme-MIR159a,cme-MIR159b,bra-MIR159a,bna-MIR159,cpa-MIR159a,cpa-MIR159b,sly-MIR159,rco-MIR…	hbr-MIR159b	ctgattagggttaagaagtggagctccttgaagtccaatagaggttcttgcgtgggtagattgagctgctgagctatggatccctcagccctatcccatcataaagagtagtcctcttggataggcttgtggcTTGCATATCTCAGGAGCTTCAttaccacatatgttagatccttgTTTGGATTGAAGGGAGCTCTAcatctaaatctttcac	hbr-MIR159b-p5	agctgctgagctatggatccct	5'	New	gp2b	(((((.((..((...((((((.......(((((((((....((............))..)))))))))...((..(((((.........)))))..)).............))))))......))......)).))))).....	139	41	-36.8	0.6	74	112.5	86.5	77	131.5	175	76.2013	96.8646	92.8232	99.872	130.828	137.948	middle
6	5	csn-miR159c	TTTGGATTGAAGGGAGCTCTA	21	Sc0004726	+	58384	58527	gAGCTGCTGACCTATGGATCCCTcattcctatccaatctttgtttgttttggtttactaattggatagatttgtggcttgcatatgtcacgagctgcattaaccctaagttggatcttgtTTTGGATTGAAGGGAGCTCTAcat	77	vvi-MIR159c,mtr-MIR159a,gma-MIR159e,gma-MIR159a,ptc-MIR159b,ptc-MIR159a,ptc-MIR159d,ptc-MIR159c,ath-MIR159a,ath-MIR159b,ath-MIR159c,mdm-MIR159a,mdm-MIR159c,mdm-MIR159b,aly-MIR159a,aly-MIR159b,aly-MIR159c,ppe-MIR159,nta-MIR159,mes-MIR159b,mes-MIR159a,mes-MIR159d,mes-MIR159c,lus-MIR159c,lus-MIR159b,lus-MIR159a,cme-MIR159a,cme-MIR159b,bra-MIR159a,bna-MIR159,cpa-MIR159a,cpa-MIR159b,sly-MIR159,rco-MIR…	vvi-MIR159c	ttttggagtggagctccttgaagtccaatagagggtcttactgggtagattgagctgctgacttatggatcccacagccctatcccgtcaatggggggcattggataggcttgtggcttgcatatctcaggagctgcattatccaagtttagatccttgTTTGGATTGAAGGGAGCTCTAcacctctctc	vvi-miR159c	TTTGGATTGAAGGGAGCTCTA	3'	Yes	gp2b	(((((.((..((...((((((.......(((((((((....((............))..)))))))))...((..(((((.........)))))..)).............))))))......))......)).))))).....	139	41	-36.8	0.6	29969.5	46526.5	41773.5	17936.5	22741.5	22301.5	30861	40060.2	44827.1	23264.3	22625.3	17579.7	high
7	7	csn-miR159	TTTGGTTTGAAGGGAGCTCTA	21	Sc0000065	-	685795	685905	TTTGGTTTGAAGGGGGCTCTAtctgatgataattgatctcagatgatgatgaagtacctgatgagacagtcacctacaattttcacaaattcaattagtccttcttcaatt	1	pde-MIR159,	pde-MIR159	taagcggtagagctccttttgtaccaatcaaggactgtgcaaaaatgatccgactgccgatttatgcatccttctgccctgcgagtgttcgttgtttcaagtccgaatagattgcaggttagtggtttgcagaagaccgatttcattgcaggttagtggtgtgcataaggcgggagttgtattgattttgtgttgtcctcgTTTGGTTTGAAGGGAGCTCTActgggc	pde-miR159	TTTGGTTTGAAGGGAGCTCTA	5'	Yes	gp2b	......((((((((((((.(((((((.(((.....)))))))))).((.(((((((..((((......))))..)))....)))))).........))))).)))))))..	103	36	-26.2	0.7	12.5	10	13	5	6	7.5	12.8718	8.61018	13.9503	6.4852	5.96933	5.91206	middle
8	7	csn-miR159	TTTGGTTTGAAGGGAGCTCTA	21	Sc0005393	-	73453	73512	tttcttcctctggccaagtggatgtgtaattataagatcTTTGGTTTGAAGGGGGCTCTA	1	pde-MIR159,	pde-MIR159	taagcggtagagctccttttgtaccaatcaaggactgtgcaaaaatgatccgactgccgatttatgcatccttctgccctgcgagtgttcgttgtttcaagtccgaatagattgcaggttagtggtttgcagaagaccgatttcattgcaggttagtggtgtgcataaggcgggagttgtattgattttgtgttgtcctcgTTTGGTTTGAAGGGAGCTCTActgggc	pde-miR159	TTTGGTTTGAAGGGAGCTCTA	3'	Yes	gp2b	...(..((((..(((((..((((.(((....)))..)))))))))..)).))..).....	52	41.7	-14	0.6	12.5	10	13	5	6	7.5	12.8718	8.61018	13.9503	6.4852	5.96933	5.91206	middle
9	8	csn-miR159b_R-1	ATTGGAGTGAAGGGAGCTCC	20	Sc0000257	+	145727	145749	ATTGGAGTGAAGGGAGCTCCgga	6	mtr-MIR159b,gma-MIR156aa,gma-MIR159f,gma-MIR159b,gma-MIR159c,gma-MIR156z,	mtr-MIR159b	aacctaatttggggctctccgcactccaagtctaaaaggaggtgatagtttacccttgctgcttgttcatggttacctttgactttgcacattggaaacttaccaaagtcatgggtttgcatgaatttggagatagggttgccttgatctttttgtATTGGAGTGAAGGGAGCTCCAaaattggac	mtr-miR159b	ATTGGAGTGAAGGGAGCTCCA	5'	Diff	gp2b	..((((((.......))))))..	19	56.5	-6.9	0.5	0	2	0	1.5	2.5	0	0	1.72204	0	1.94556	2.48722	0	low
10	8	csn-miR159b_R-1	ATTGGAGTGAAGGGAGCTCC	20	Sc0001262	+	100870	100919	ttatggATTGGAGTGAAGGGAGCTCCtatggcccttccaacaatctaact	6	mtr-MIR159b,gma-MIR156aa,gma-MIR159b,gma-MIR159c,gma-MIR156z,gma-MIR159f,	mtr-MIR159b	aacctaatttggggctctccgcactccaagtctaaaaggaggtgatagtttacccttgctgcttgttcatggttacctttgactttgcacattggaaacttaccaaagtcatgggtttgcatgaatttggagatagggttgccttgatctttttgtATTGGAGTGAAGGGAGCTCCAaaattggac	mtr-miR159b	ATTGGAGTGAAGGGAGCTCCA	5'	Diff	gp2b	...(((((((....((((((...........))))))...)))))))...	44	46	-15	0.7	0	2	0	1.5	2.5	0	0	1.72204	0	1.94556	2.48722	0	low
11	9	csn-miR159a-p3_2ss9AT18TG	CCCTCCTTTTGATCCTTGT	19	Sc0000488	+	852682	852722	cccgatcaacttctaacttgaaCCCTCCTTTTGATCCTTGT	1	htu-MIR159a,	htu-MIR159a	gtagagctccttaaagtccaatagaagatctgagtgagaacatagagctgctagtttatggatccctcaagtcctatctttgttgatgtataggctttgtggcttgcatacacttggagctttattaccctccttatgatcctttTTTGGATTGAAGGGAGCTCTAcaccatcat	htu-MIR159a-p3	ccctccttatgatcctttT	3'	New	gp2b	...((((((.(((......)))........)))))).....	33	43.9	-3.1	0.2	0	0	0	0	13.5	6.5	0	0	0	0	13.431	5.12378	middle
12	9	csn-miR159a-p3_2ss9AT18TG	CCCTCCTTTTGATCCTTGT	19	xfSc0000367	+	55724	55743	aCCCTCCTTTTGATCCTTGT	1	htu-MIR159a,	htu-MIR159a	gtagagctccttaaagtccaatagaagatctgagtgagaacatagagctgctagtttatggatccctcaagtcctatctttgttgatgtataggctttgtggcttgcatacacttggagctttattaccctccttatgatcctttTTTGGATTGAAGGGAGCTCTAcaccatcat	htu-MIR159a-p3	ccctccttatgatcctttT	3'	New	gp2b	....((.....)).......	9	45	2.1	-0.2	0	0	0	0	13.5	6.5	0	0	0	0	13.431	5.12378	middle
13	10	csn-miR159b-p5_2ss11CA18TG	TGGGTCCAAAAAGAGGGG	18	Sc0001443	+	403321	403402	ctTGGGTCCAAAAAGAGGGGcagtgccccgcctccgattcatggaagaggggcagttccccactgattctgccaagcccgtt	2	lus-MIR159b,lus-MIR159c,	lus-MIR159b	aagagagctcctttgggtccaaacagagggtgtggatagggtgagatggaagctgctgagctatggattccacaaccccacccttttgattattgatccggtgggttgtggctcgttttgcatatctcaggagcctccgttccctgttttcttctcttccctccTTTGGATTGAAGGGAGCTCTCtt	lus-MIR159b-p5	tgggtccaaacagagggt	5'	New	gp2b	(((((........((.((((...((((((...((((.....))))...))))))...)))).)).......)))))......	51	59.8	-29.7	0.6	3.5	0	3	0	4.5	4.5	3.60411	0	3.2193	0	4.477	3.54723	low
14	11	csn-miR159c-p5_2ss13GT19CA	TTTGGATTGAAGTGAGCTAT	20	Sc0001599	+	430118	430188	gatTTTGGATTGAAGTGTGCTATttgggcccgtggggttcaccataggtcccgtttcaataatccgaaccg	49	vvi-MIR159c,mtr-MIR159a,gma-MIR159e,gma-MIR159a,ptc-MIR159a,ptc-MIR159b,ath-MIR159a,ath-MIR159c,ath-MIR159b,aly-MIR159b,aly-MIR159c,aly-MIR159a,ppe-MIR159,nta-MIR159,mes-MIR159b,mes-MIR159a,lus-MIR159c,lus-MIR159b,cme-MIR159a,bra-MIR159a,bna-MIR159,cpa-MIR159a,sly-MIR159,rco-MIR159,csi-MIR159,hbr-MIR159b,hbr-MIR159a,ahy-MIR159,htu-MIR159a,pvu-MIR159a,atr-MIR159,osa-MIR159b,osa-MIR159a,bdi-MIR159b…	vvi-MIR159c	ttttggagtggagctccttgaagtccaatagagggtcttactgggtagattgagctgctgacttatggatcccacagccctatcccgtcaatggggggcattggataggcttgtggcttgcatatctcaggagctgcattatccaagtttagatccttgTTTGGATTGAAGGGAGCTCTAcacctctctc	vvi-MIR159c-p5	TTTGGATTGAAGGGAGCTCT	5'	New	gp2b	...(((((((((.((....))....(((((..(((......)))..)))))........)))))))))...	65	49.3	-21.4	0.6	1.5	4	0	0	0	0	1.54462	3.44407	0	0	0	0	low
15	12	csn-miR159c-p3_2ss11CA18TG	TGGGTCCAAAAAGAGGGG	18	Sc0001791	+	111512	111556	cccggatcggcccgccgaggtgggcctTGGGTCCAAAAAGAGGGG	2	lus-MIR159c,lus-MIR159b,	lus-MIR159c	gagagataaaaagagggagagctcctttgggtccaaacagagggtgtggatagggtgaaacggaagctgctgagctatggattccacagccacccccgtatcttaaataattggggtggttgtggctcgttttgcatatctcaggagcctccgttccctgttttcttttcttccctccTTTGGATTGAAGGGAGCTCTTcatttctt	lus-MIR159c-p3	tgggtccaaacagagggt	3'	New	gp2b	(((((((((((((((....)))))))...))))).......))).	44	71.1	-23.2	0.7	3.5	0	3	0	4.5	4.5	3.60411	0	3.2193	0	4.477	3.54723	low
16	13	csn-miR159a-5p_L-1R-1	AGCTCCTTGAAGTCCAATT	19	Sc0002054	-	304116	304250	tgacaAGCTCCTTGAGGTCCAATTcatcaaaaatgtggactatcctaaatggttgtcaaatgtggtcctagtccgcaagaacaatggcaaatggcgactttgtgtcgattactctgacctgaaccgagcttgccc	3	gma-MIR159e,gma-MIR159a,pvu-MIR159a,	gma-MIR159a	aattaaaggggattatgaagtgGAGCTCCTTGAAGTCCAATTGaggatcttactgggtgaattgagctgcttagctatggatcccacagttctacccatcaataagtgcttttgtggtagtcttgtggcttccatatttggggagcttcatttgcctttatagtattaaccttcTTTGGATTGAAGGGAGCTCTAcacccttctcttcttttct	gma-miR159a-5p	GAGCTCCTTGAAGTCCAATTG	5'	Diff	gp2b	...(((((((.((.(((((....((((......(((((((((.((..................))...)))))))))......)))).......((((.....))))........))))).))..)))))))...	129	45.9	-35.9	0.6	0	1.5	0	0	4	2.5	0	1.29153	0	0	3.97955	1.97069	low
17	13	csn-miR159a-5p_L-1R-1	AGCTCCTTGAAGTCCAATT	19	Sc0004759	+	54328	54466	gttgacaAGCTCCTTGAGGTCCAATTcatcaaaaacgtggattaccctaaatggttgtcaaacgtggtcttagtccgcaagaacaatggcaaatggcgactctatgtcgactactctgacctaaaccgagcttgtccca	3	gma-MIR159e,gma-MIR159a,pvu-MIR159a,	gma-MIR159a	aattaaaggggattatgaagtgGAGCTCCTTGAAGTCCAATTGaggatcttactgggtgaattgagctgcttagctatggatcccacagttctacccatcaataagtgcttttgtggtagtcttgtggcttccatatttggggagcttcatttgcctttatagtattaaccttcTTTGGATTGAAGGGAGCTCTAcacccttctcttcttttct	gma-miR159a-5p	GAGCTCCTTGAAGTCCAATTG	5'	Diff	gp2b	...(((((((((....(((((...............((((((((......(((.........))).....))))))))...............(((((((.....)))).)))....))))).....)))))))))...	133	46	-38.3	0.6	0	1.5	0	0	4	2.5	0	1.29153	0	0	3.97955	1.97069	low
18	14	csn-miR159c_R-1_1ss3TG	TTGGGATTGAAGGGAGCTCT	20	Sc0002355	-	146946	146985	taagtTTGGGATTGAAGAGAGCTCTtctacattgaaccca	47	vvi-MIR159c,mtr-MIR159a,gma-MIR159e,gma-MIR159a,ptc-MIR159a,ptc-MIR159b,ath-MIR159a,ath-MIR159b,aly-MIR159b,aly-MIR159a,ppe-MIR159,nta-MIR159,mes-MIR159b,mes-MIR159a,lus-MIR159c,lus-MIR159b,cme-MIR159a,bra-MIR159a,bna-MIR159,cpa-MIR159a,sly-MIR159,rco-MIR159,csi-MIR159,hbr-MIR159b,hbr-MIR159a,ahy-MIR159,htu-MIR159a,pvu-MIR159a,atr-MIR159,osa-MIR159b,osa-MIR159a,bdi-MIR159b,sbi-MIR159a,zma-MIR159j…	vvi-MIR159c	ttttggagtggagctccttgaagtccaatagagggtcttactgggtagattgagctgctgacttatggatcccacagccctatcccgtcaatggggggcattggataggcttgtggcttgcatatctcaggagctgcattatccaagtttagatccttgTTTGGATTGAAGGGAGCTCTAcacctctctc	vvi-miR159c	TTTGGATTGAAGGGAGCTCTA	5'	Diff	gp2b	...(((..(....(((((....)))))....)..)))...	34	40	-9.2	0.6	2	5	2.5	2.5	3.5	0	2.05949	4.30509	2.68275	3.2426	3.48211	0	low
19	14	csn-miR159c_R-1_1ss3TG	TTGGGATTGAAGGGAGCTCT	20	xfSc0025003	+	297	336	taagtTTGGGATTGAAGAGAGCTCTtccacattgaaccca	47	vvi-MIR159c,mtr-MIR159a,gma-MIR159e,gma-MIR159a,ptc-MIR159b,ptc-MIR159a,ath-MIR159a,ath-MIR159b,aly-MIR159a,aly-MIR159b,ppe-MIR159,nta-MIR159,mes-MIR159b,mes-MIR159a,lus-MIR159c,lus-MIR159b,cme-MIR159a,bra-MIR159a,bna-MIR159,cpa-MIR159a,sly-MIR159,rco-MIR159,csi-MIR159,hbr-MIR159b,hbr-MIR159a,ahy-MIR159,htu-MIR159a,pvu-MIR159a,atr-MIR159,osa-MIR159b,osa-MIR159a,bdi-MIR159b,sbi-MIR159a,zma-MIR159j…	vvi-MIR159c	ttttggagtggagctccttgaagtccaatagagggtcttactgggtagattgagctgctgacttatggatcccacagccctatcccgtcaatggggggcattggataggcttgtggcttgcatatctcaggagctgcattatccaagtttagatccttgTTTGGATTGAAGGGAGCTCTAcacctctctc	vvi-miR159c	TTTGGATTGAAGGGAGCTCTA	5'	Diff	gp2b	...(((..(....(((((....)))))....)..)))...	34	42.5	-8.5	0.5	2	5	2.5	2.5	3.5	0	2.05949	4.30509	2.68275	3.2426	3.48211	0	low
20	15	csn-miR159c_1ss12GA	TTTGGATTGAAAGGAGCTCTA	21	Sc0002837	-	86926	87058	TTTGGATTGAAAGGAACTCTAgaattttttggaggaatgaataggcatgattgtaacctatgggaatttcttttaaggttctgtttgtctttattgctttgattagttggtttctactcgtgttcttgtctta	48	vvi-MIR159c,mtr-MIR159a,gma-MIR159e,gma-MIR159a,ptc-MIR159a,ptc-MIR159b,ath-MIR159a,ath-MIR159b,aly-MIR159a,aly-MIR159b,ppe-MIR159,nta-MIR159,mes-MIR159b,mes-MIR159a,lus-MIR159c,lus-MIR159b,cme-MIR159a,bra-MIR159a,bna-MIR159,cpa-MIR159a,sly-MIR159,rco-MIR159,csi-MIR159,hbr-MIR159b,hbr-MIR159a,ahy-MIR159,htu-MIR159a,pvu-MIR159a,atr-MIR159,osa-MIR159b,osa-MIR159a,bdi-MIR159b,sbi-MIR159a,zma-MIR159j…	vvi-MIR159c	ttttggagtggagctccttgaagtccaatagagggtcttactgggtagattgagctgctgacttatggatcccacagccctatcccgtcaatggggggcattggataggcttgtggcttgcatatctcaggagctgcattatccaagtttagatccttgTTTGGATTGAAGGGAGCTCTAcacctctctc	vvi-miR159c	TTTGGATTGAAGGGAGCTCTA	5'	Diff	gp2b	...((((.((((((((((....((((..(..(((.(((((..(((((.(((...(((((..(((....)))....)))))..))))))))))))).)))..)..))))))))))).......)))..))))..	128	33.1	-27	0.6	11.5	22.5	17.5	5.5	7	4	11.8421	19.3729	18.7793	7.13372	6.96422	3.1531	middle
21	16	csn-miR159c_R-1_1ss19CA	TTTGGATTGAAGGGAGCTAT	20	Sc0002966	-	110164	110202	atgccttctagtccaaaaTTTGGATTGAAGGGCGCTATc	47	vvi-MIR159c,mtr-MIR159a,gma-MIR159e,gma-MIR159a,ptc-MIR159a,ptc-MIR159b,ath-MIR159a,ath-MIR159b,aly-MIR159b,aly-MIR159a,ppe-MIR159,nta-MIR159,mes-MIR159b,mes-MIR159a,lus-MIR159c,lus-MIR159b,cme-MIR159a,bra-MIR159a,bna-MIR159,cpa-MIR159a,sly-MIR159,rco-MIR159,csi-MIR159,hbr-MIR159b,hbr-MIR159a,ahy-MIR159,htu-MIR159a,pvu-MIR159a,atr-MIR159,osa-MIR159b,osa-MIR159a,bdi-MIR159b,sbi-MIR159a,zma-MIR159j…	vvi-MIR159c	ttttggagtggagctccttgaagtccaatagagggtcttactgggtagattgagctgctgacttatggatcccacagccctatcccgtcaatggggggcattggataggcttgtggcttgcatatctcaggagctgcattatccaagtttagatccttgTTTGGATTGAAGGGAGCTCTAcacctctctc	vvi-miR159c	TTTGGATTGAAGGGAGCTCTA	3'	Diff	gp2b	..(((((..(((((((...)))))))..)))))......	31	43.6	-14.8	0.9	7.5	2.5	5.5	0	3.5	0	7.7231	2.15255	5.90205	0	3.48211	0	low
22	17	csn-miR159c_1ss20TC	TTTGGATTGAAGGGAGCTCCA	21	Sc0003279	+	231540	231581	cagccttgacgaataccctgtTTTGGATTAAAGGGAGCTCCA	29	vvi-MIR159c,mtr-MIR159a,gma-MIR159e,gma-MIR159a,ptc-MIR159a,ptc-MIR159b,ath-MIR159c,ath-MIR159a,aly-MIR159c,aly-MIR159a,ppe-MIR159,nta-MIR159,mes-MIR159b,mes-MIR159a,cme-MIR159a,bra-MIR159a,bna-MIR159,cpa-MIR159a,sly-MIR159,rco-MIR159,csi-MIR159,pta-MIR159a,hbr-MIR159b,hbr-MIR159a,ahy-MIR159,htu-MIR159a,pvu-MIR159a,atr-MIR159,osa-MIR159c,	vvi-MIR159c	ttttggagtggagctccttgaagtccaatagagggtcttactgggtagattgagctgctgacttatggatcccacagccctatcccgtcaatggggggcattggataggcttgtggcttgcatatctcaggagctgcattatccaagtttagatccttgTTTGGATTGAAGGGAGCTCTAcacctctctc	vvi-miR159c	TTTGGATTGAAGGGAGCTCTA	3'	Diff	gp2b	...((..((((.......))))..))......(((...))).	23	47.6	-6.3	0.3	46	59.5	72.5	33	43	24.5	47.3684	51.2306	77.7998	42.8023	42.7802	19.3127	middle
23	18	csn-miR159c_1ss19CA	TTTGGATTGAAGGGAGCTATA	21	Sc0003293	-	136820	136936	ctttctaaatccaaaacctttgccttctttagctgattttcaatcacactcaaggagtcaagaatactgaggctctgatagatagttatctctgctTTTGGATTGAAGAGAGCTATA	50	vvi-MIR159c,mtr-MIR159a,gma-MIR159e,gma-MIR159a,ptc-MIR159a,ptc-MIR159b,ath-MIR159a,ath-MIR159c,ath-MIR159b,aly-MIR159a,aly-MIR159b,aly-MIR159c,ppe-MIR159,nta-MIR159,mes-MIR159b,mes-MIR159a,lus-MIR159c,lus-MIR159b,cme-MIR159a,bra-MIR159a,bna-MIR159,cpa-MIR159a,sly-MIR159,rco-MIR159,csi-MIR159,hbr-MIR159b,hbr-MIR159a,ahy-MIR159,htu-MIR159a,pvu-MIR159a,atr-MIR159,osa-MIR159f,osa-MIR159b,osa-MIR159a…	vvi-MIR159c	ttttggagtggagctccttgaagtccaatagagggtcttactgggtagattgagctgctgacttatggatcccacagccctatcccgtcaatggggggcattggataggcttgtggcttgcatatctcaggagctgcattatccaagtttagatccttgTTTGGATTGAAGGGAGCTCTAcacctctctc	vvi-miR159c	TTTGGATTGAAGGGAGCTCTA	3'	Diff	gp2b	((((((.((((((((...((((.((((((.((.(((((...)))))..)).)))))).))))........(((...(((((....)))))...)))))))))))..)))))).....	112	36.8	-27.8	0.6	29.5	42	31	10.5	5	1.5	30.3775	36.1628	33.2661	13.6189	4.97444	1.18241	middle
24	19	csn-miR159c_R-1_1ss6AC	TTTGGCTTGAAGGGAGCTCT	20	xfSc0002602	+	6963	6989	ttagagcTTTGGCTTGAAAGGAGCTCT	48	vvi-MIR159c,mtr-MIR159a,gma-MIR159e,gma-MIR159a,ptc-MIR159a,ptc-MIR159b,ath-MIR159a,ath-MIR159b,aly-MIR159b,aly-MIR159a,ppe-MIR159,nta-MIR159,mes-MIR159b,mes-MIR159a,lus-MIR159c,lus-MIR159b,cme-MIR159a,bra-MIR159a,bna-MIR159,cpa-MIR159a,sly-MIR159,rco-MIR159,csi-MIR159,hbr-MIR159b,hbr-MIR159a,pde-MIR159,ahy-MIR159,htu-MIR159a,pvu-MIR159a,atr-MIR159,osa-MIR159b,osa-MIR159a,bdi-MIR159b,sbi-MIR159a,…	vvi-MIR159c	ttttggagtggagctccttgaagtccaatagagggtcttactgggtagattgagctgctgacttatggatcccacagccctatcccgtcaatggggggcattggataggcttgtggcttgcatatctcaggagctgcattatccaagtttagatccttgTTTGGATTGAAGGGAGCTCTAcacctctctc	vvi-miR159c	TTTGGATTGAAGGGAGCTCTA	3'	Diff	gp2b	..(((((((...........)))))))	25	44.4	-7.1	0.6	0	0	27	11.5	0	0	0	0	28.9737	14.916	0	0	middle
25	20	csn-miR159c_R-1_1ss19CT	TTTGGATTGAAGGGAGCTTT	20	xpSc0057210	+	5566	5653	ttagtctcttcaaataggatgccatacaaacatggtgtcctccttcgtagtaatagttttcacctcctTTTGGATTGAAGGGACCTTT	47	vvi-MIR159c,mtr-MIR159a,gma-MIR159a,gma-MIR159e,ptc-MIR159b,ptc-MIR159a,ath-MIR159a,ath-MIR159b,aly-MIR159a,aly-MIR159b,ppe-MIR159,nta-MIR159,mes-MIR159a,mes-MIR159b,lus-MIR159c,lus-MIR159b,cme-MIR159a,bra-MIR159a,bna-MIR159,cpa-MIR159a,sly-MIR159,rco-MIR159,csi-MIR159,hbr-MIR159b,hbr-MIR159a,ahy-MIR159,htu-MIR159a,pvu-MIR159a,atr-MIR159,osa-MIR159a,osa-MIR159b,bdi-MIR159b,sbi-MIR159a,zma-MIR159k…	vvi-MIR159c	ttttggagtggagctccttgaagtccaatagagggtcttactgggtagattgagctgctgacttatggatcccacagccctatcccgtcaatggggggcattggataggcttgtggcttgcatatctcaggagctgcattatccaagtttagatccttgTTTGGATTGAAGGGAGCTCTAcacctctctc	vvi-miR159c	TTTGGATTGAAGGGAGCTCTA	3'	Diff	gp2b	...((((((((((..((((..((((......))))..)))).......................(((....)))))))))))))....	81	39.8	-27.7	0.8	1.5	3.5	2	2.5	4	1.5	1.54462	3.01356	2.1462	3.2426	3.97955	1.18241	low
26	21	csn-miR160b-p5_2ss12CT17CG	AGCCATGCATGTCTAAGTA	19	xpSc0053208	-	24100	24229	AGCCATGCATGTCTAAGTAtaagcaattataccgcgaaactgcgaatggctcattaaatcaGTTATCGTTTATTTGATAgtaccttactacttgggtaaccgtggtaattctagagctaatacatgctac	3	aly-MIR858,lus-MIR160b,cme-MIR160c,	lus-MIR160b	ggtggtgagttagtgtgtaatgtgtgtgcgTGCCTGGCTCCCTGTATGCCAtttgcaagagctcatcaacacagttttgatggggcttggtggatggcgtactgagtagccatgcatgcctaactatcattgctccaaatctaacttctccatt	lus-MIR160b-p5	agccatgcatgcctaacta	5'	New	gp2b	......((((((....((((((....))))))((((....))))..((((((..........((((((......))))))....(((((((..((....))))))))).....))))))..))))))...	121	37.7	-32.6	0.7	0	0	0	0	2	2	0	0	0	0	1.98978	1.57655	low
26	22	csn-miR858-p3_2ss15CG18TA	GTTATCGTTTATTTGATA	18	xpSc0053208	-	24100	24229	AGCCATGCATGTCTAAGTAtaagcaattataccgcgaaactgcgaatggctcattaaatcaGTTATCGTTTATTTGATAgtaccttactacttgggtaaccgtggtaattctagagctaatacatgctac	3	aly-MIR858,lus-MIR160b,cme-MIR160c,	aly-MIR858	agagtgattggattcgatgctaggcttgacaaagtgagcaatcttatgtgttctcatctttgTTTCGTTGTCTGTTCGACCTTggtctcgatctctccttaaaaccctaatacgttatcgtttatttcattcatctatccttcttatgatcatcatacatggtatcggtttatgattgatggggtagatagatgatcgaaacttttgatttctgaggctttttttttttttttaaacatttagtataccagatattactagtacacacatacatactgacacgatagtctatttgatgattaagtctttacgttcgtatacatacggatttccctttcttttgcataaaatcttagattatcgtaggcatgcggatttacaataagaaagatgattgtc…	aly-MIR858-p3	gttatcgtttatttcatt	3'	New	gp2b	......((((((....((((((....))))))((((....))))..((((((..........((((((......))))))....(((((((..((....))))))))).....))))))..))))))...	121	37.7	-32.6	0.7	0	0	0	1.5	0	0	0	0	0	1.94556	0	0	low
27	21	csn-miR160b-p5_2ss12CT17CG	AGCCATGCATGTCTAAGTA	19	xpSc0053208	-	34318	34404	aaagattaAGCCATGCATGTCTAAGTAtaagcaactatacggtgaaactgcgaatggctcattaaatcaGTTATCGTTTATTTGATA	3	aly-MIR858,lus-MIR160b,cme-MIR160c,	lus-MIR160b	ggtggtgagttagtgtgtaatgtgtgtgcgTGCCTGGCTCCCTGTATGCCAtttgcaagagctcatcaacacagttttgatggggcttggtggatggcgtactgagtagccatgcatgcctaactatcattgctccaaatctaacttctccatt	lus-MIR160b-p5	agccatgcatgcctaacta	5'	New	gp2b	...((((.(((((((((..((...(((((......)))))...))...)))..)))))).....))))...(((((......)))))	65	33.3	-17.1	0.6	0	0	0	0	2	2	0	0	0	0	1.98978	1.57655	low
27	22	csn-miR858-p3_2ss15CG18TA	GTTATCGTTTATTTGATA	18	xpSc0053208	-	34318	34404	aaagattaAGCCATGCATGTCTAAGTAtaagcaactatacggtgaaactgcgaatggctcattaaatcaGTTATCGTTTATTTGATA	3	aly-MIR858,lus-MIR160b,cme-MIR160c,	aly-MIR858	agagtgattggattcgatgctaggcttgacaaagtgagcaatcttatgtgttctcatctttgTTTCGTTGTCTGTTCGACCTTggtctcgatctctccttaaaaccctaatacgttatcgtttatttcattcatctatccttcttatgatcatcatacatggtatcggtttatgattgatggggtagatagatgatcgaaacttttgatttctgaggctttttttttttttttaaacatttagtataccagatattactagtacacacatacatactgacacgatagtctatttgatgattaagtctttacgttcgtatacatacggatttccctttcttttgcataaaatcttagattatcgtaggcatgcggatttacaataagaaagatgattgtc…	aly-MIR858-p3	gttatcgtttatttcatt	3'	New	gp2b	...((((.(((((((((..((...(((((......)))))...))...)))..)))))).....))))...(((((......)))))	65	33.3	-17.1	0.6	0	0	0	1.5	0	0	0	0	0	1.94556	0	0	low
28	23	csn-miR160c_L+2	TCTGCCTGGCTCCCTGTATGCCA	23	xpSc0054236	-	30123	30252	ctcgaaagaaaggtgaaataggtTGTGCCTGGCTCCCTGTATGCCAcacgaacaaaccaatctttgtgttgattggtttgacgagtgGCGTGCGAGGAGCCAAGCATGccgacattctctctctctcact	9	vvi-MIR160c,cpa-MIR160b,cpa-MIR160e,smo-MIR160a,pab-MIR160b,osa-MIR160d,bdi-MIR160a,ata-MIR160a,tae-MIR160,	vvi-MIR160c	aaatgggttgTGCCTGGCTCCCTGTATGCCAcacgtagagaccactccctttcccggattggctatttgcgggtggcgtgcgaggagccaagcatacccaccattc	vvi-miR160c	TGCCTGGCTCCCTGTATGCCA	5'	Diff	gp2b	...((.(((.(((.(((...(((...((.(((((((..(((((((((.((..((((((((((........)))))))))).)).)))))))))..))))))).))..)))....)))))).))).))...	124	50	-59.7	0.9	6	3.5	0	0	0	0	6.17848	3.01356	0	0	0	0	low
28	24	csn-miR160d-3p	GCGTGCGAGGAGCCAAGCATG	21	xpSc0054236	-	30123	30252	ctcgaaagaaaggtgaaataggtTGTGCCTGGCTCCCTGTATGCCAcacgaacaaaccaatctttgtgttgattggtttgacgagtgGCGTGCGAGGAGCCAAGCATGccgacattctctctctctcact	9	vvi-MIR160c,cpa-MIR160b,cpa-MIR160e,smo-MIR160a,pab-MIR160b,osa-MIR160d,bdi-MIR160a,ata-MIR160a,tae-MIR160,	osa-MIR160d	ggggataTGCCTGGCTCCCTGTATGCCActcgcgtagctgccaaactcagttgaaacaactgccttctcccggcgagattcaggcattgtgttcgtacgtttggctctactgcggatgGCGTGCGAGGAGCCAAGCATGacc	osa-miR160d-3p	GCGTGCGAGGAGCCAAGCATG	3'	Yes	gp2b	...((.(((.(((.(((...(((...((.(((((((..(((((((((.((..((((((((((........)))))))))).)).)))))))))..))))))).))..)))....)))))).))).))...	124	50	-59.7	0.9	0	5	0	0	7	4	0	4.30509	0	0	6.96422	3.1531	low
29	25	csn-miR160a-p3	TATGAGGAGCCAAGCATATCC	21	Sc0000246	+	485588	485721	cacacatatatatatatgtatgtatatgcctggctccctgtatgccatttgcagagtctattgatacattgatggcctccgtgaatggcgTATGAGGAGCCAAGCATATCCcgcgatgatagtatatatgtaat	3	nta-MIR160a,nta-MIR160b,cme-MIR160b,	nta-MIR160a	aatatgcataTGCCTGGCTCCCTGTATGCCAtttgcagagctcatcggaataccgttgggtccccgtgaatggcgtatgaggagccaagcatatcccggatat	nta-MIR160a-p3	tatgaggagccaagcatatcc	3'	New	gp2b	...((((((((((.(((...(((((((((.(((((((..((((((((((..(.(((.((((..(....)..)))).))).)..))))))))))..))))))).))))))...)))...)))))))))))))...	128	41	-58.5	1.1	15	23	20	7	9	6	15.4462	19.8034	21.462	9.07927	8.954	4.72964	middle
30	26	csn-miR160c	TGCCTGGCTCCCTGTATGCCG	21	Sc0002269	-	288832	288946	tagtccaaagtgagcaTGCCTGGCTCCCTGTATGCCTgcaggaatgttgtcggatatacaacacaaggggctgctgggcctgagggggttgctgggaaatgatggcattggaagt	5	mes-MIR160c,htu-MIR160a,osa-MIR160e,bdi-MIR160f,zma-MIR160f,	mes-MIR160c	ggctaTGCCTGGCTCCCTGTATGCCGcaagctagagttcaatccccactgtggattggctgttgccggtggcgtgcgaggagccaagcataccc	mes-miR160c	TGCCTGGCTCCCTGTATGCCG	5'	Yes	gp2b	...(((((.((...(((.((..((.((((.((.((((((((...((((((.......)))))).......)))).)))).))..))))..))..))..)))...)).)))))...	109	53.9	-37.9	0.6	24.5	35.5	22.5	20.5	17.5	23.5	25.2288	30.5662	24.1448	26.5893	17.4105	18.5244	middle
31	26	csn-miR160c	TGCCTGGCTCCCTGTATGCCG	21	Sc0004685	-	132322	132447	aTGCCTGGCTCCCTGTATGCCTgcaggaatgttgttggatagacaacacaaaggactgctgggccctagggggttgcgtgaaaatgacggcattgaaaattggccgtcgagagggaagtcggggtg	5	mes-MIR160c,htu-MIR160a,osa-MIR160e,bdi-MIR160f,zma-MIR160f,	mes-MIR160c	ggctaTGCCTGGCTCCCTGTATGCCGcaagctagagttcaatccccactgtggattggctgttgccggtggcgtgcgaggagccaagcataccc	mes-miR160c	TGCCTGGCTCCCTGTATGCCG	5'	Yes	gp2b	...(((((((((((.(((((..((((...(((.((((......))))))).....))))...((((....)))).)))))....(((((((...........)))))))..))))).))))))...	120	54.8	-47.6	0.7	24.5	35.5	22.5	20.5	17.5	23.5	25.2288	30.5662	24.1448	26.5893	17.4105	18.5244	middle
32	27	csn-miR160a_L+2	TCTGCCTGGCTCCCTGTATGCCA	23	xfSc0001504	-	18357	18475	tgagacgcaataaTATGCCTGGCTCCCTGTATGCCAtttgcaaagtccatatgtaaatcgatggtcttcatgaatggcatgcaaggagccatgcatggcatgttattgattatgtccac	3	lus-MIR160h,smo-MIR160a,pab-MIR160b,	lus-MIR160h	ggtagagggtgaatttgagaataTGCCTGGCTCCCTGTATGCCAcaggcaaactcccaatcccaaattgttggttttctatcagattggttgttgctggtggcgtacatggagtcaagcatgtagtatatgcgccctctttc	lus-miR160a	TGCCTGGCTCCCTGTATGCCA	5'	Diff	gp2b	((.(((((((((((((((((((((((.((((((((((((...(((.((((.((.....)))))).)))...)))))))))))).))))))).....))))))))))))....)))))).	118	43.7	-55.6	1.1	6	3.5	0	0	0	0	6.17848	3.01356	0	0	0	0	low
33	28	csn-miR160c-p5_2ss13AG17AG	AGCCATGCATGTGTAAGT	18	xpSc0053318	+	236012	236035	AGCCATGCATGTGTAAGTatgaac	1	cme-MIR160c,	cme-MIR160c	tcatcgtaaTGCCTGGCTCCCTGTATGCCAtttgcaaagcccatcatctaaaaataggtggccttctcgaatggcatgcaaggagccatgcatgtataaatt	cme-MIR160c-p5	agccatgcatgtataaat	5'	New	gp2b	...(((((........)))))...	18	41.7	-4.1	0.4	4	0	0	7	3	5	4.11899	0	0	9.07927	2.98467	3.94137	low
34	29	csn-miR164b-p5_1ss10TG	TGAGTTAGTGCTTCATGTGCC	21	Sc0000148	+	135236	135271	aaTGAGTTAGTACTTCATGTGCCCCTCTTCCCCATC	2	cpa-MIR164b,rco-MIR164c,	cpa-MIR164b	TGGAGAAGCAGGGCACGTGCAttactaactcatgcacgattttttatatatacccgcacccaatgagttagttcttcatgtgcccgtcttccccatc	cpa-MIR164b-p5	tgagttagttcttcatgtgcc	5'	New	gp2b	...(((...((((.....))))..))).........	24	47.2	-5.5	0.3	4.5	0	4	2	2	1.5	4.63386	0	4.2924	2.59408	1.98978	1.18241	low
34	30	csn-miR164b-p3	CATGTGCCCGTCTTCCCCATC	21	Sc0000148	+	135236	135271	aaTGAGTTAGTACTTCATGTGCCCCTCTTCCCCATC	2	cpa-MIR164b,rco-MIR164c,	cpa-MIR164b	TGGAGAAGCAGGGCACGTGCAttactaactcatgcacgattttttatatatacccgcacccaatgagttagttcttcatgtgcccgtcttccccatc	cpa-MIR164b-p3	catgtgcccgtcttccccatc	3'	New	gp2b	...(((...((((.....))))..))).........	24	47.2	-5.5	0.3	1171	1218	1351	1100	1855	2077	1205.83	1048.72	1449.76	1426.74	1845.52	1637.25	high
35	31	csn-miR164a_L+1_1	ATGGAGAAGCAGGGCACGTGCA	22	Sc0002168	+	250320	250463	agATGGAGAAGCAGGGCACGTGCAttactaactcatgcacaaaggcatattttgaagcgcagttacggctctttgatatttttctgtgtacatagcatttctgatccttctattacctcttgaTGAGTTAGTGCTTCATGTGCC	101	vvi-MIR164c,vvi-MIR164d,vvi-MIR164a,mtr-MIR164b,mtr-MIR164c,mtr-MIR164a,gma-MIR164i,gma-MIR164h,gma-MIR164c,gma-MIR164g,gma-MIR164d,gma-MIR164a,gma-MIR164e,gma-MIR164j,gma-MIR164b,gma-MIR164f,gma-MIR164k,ptc-MIR164e,ptc-MIR164b,ptc-MIR164a,ptc-MIR164c,ptc-MIR164d,ath-MIR164b,ath-MIR164a,ath-MIR164c,mdm-MIR164f,mdm-MIR164e,mdm-MIR164d,mdm-MIR164c,mdm-MIR164b,aly-MIR164b,aly-MIR164c,aly-MIR164a,ppe…	vvi-MIR164a	agctccttgtTGGAGAAGCAGGGCACGTGCAgatttgcctcacttttcccccttttttcttctttactcccaccaccgcccacaggcttgcacgtgctccccttctccaacatgggttcct	vvi-miR164a	TGGAGAAGCAGGGCACGTGCA	5'	Diff	gp2b	..............((((((((...(((((((((((.((...(((........((((..(((.....(((.....((((......))))....)))....)))...)))).....)))..)))))))))))))...))))))))	130	41.7	-38.2	0.6	1752	1357	1712.5	749	560.5	785.5	1804.12	1168.4	1837.68	971.482	557.635	619.189	high
35	32	csn-miR164b-p3_1ss10TG	TGAGTTAGTGCTTCATGTGCC	21	Sc0002168	+	250320	250463	agATGGAGAAGCAGGGCACGTGCAttactaactcatgcacaaaggcatattttgaagcgcagttacggctctttgatatttttctgtgtacatagcatttctgatccttctattacctcttgaTGAGTTAGTGCTTCATGTGCC	101	vvi-MIR164c,vvi-MIR164d,vvi-MIR164a,mtr-MIR164b,mtr-MIR164c,mtr-MIR164a,gma-MIR164i,gma-MIR164h,gma-MIR164c,gma-MIR164g,gma-MIR164d,gma-MIR164a,gma-MIR164e,gma-MIR164j,gma-MIR164b,gma-MIR164f,gma-MIR164k,ptc-MIR164e,ptc-MIR164b,ptc-MIR164a,ptc-MIR164c,ptc-MIR164d,ath-MIR164b,ath-MIR164a,ath-MIR164c,mdm-MIR164f,mdm-MIR164e,mdm-MIR164d,mdm-MIR164c,mdm-MIR164b,aly-MIR164b,aly-MIR164c,aly-MIR164a,ppe…	mtr-MIR164b	caagaTGGAGAAGCAGGGCACGTGCAatactaactcatgaacatacacacatgatggaagtgaatacaaagagaatctacattctcttatgtttcatttttttaattgagttagttcttcatgtgcccctcttccccatcatga	mtr-MIR164b-p3	tgagttagttcttcatgtgcc	3'	New	gp2b	..............((((((((...(((((((((((.((...(((........((((..(((.....(((.....((((......))))....)))....)))...)))).....)))..)))))))))))))...))))))))	130	41.7	-38.2	0.6	4.5	0	4	2	2	1.5	4.63386	0	4.2924	2.59408	1.98978	1.18241	low
36	33	csn-miR164c-5p_1ss1TG	GGGAGAAGCAGGGCACGTGCG	21	Sc0000327	+	228927	228961	GGGAGAATCAGGGCACGTGCGggagcacgtgcaat	9	ath-MIR164c,aly-MIR164c,bra-MIR164d,bna-MIR164d,bra-MIR164b,bra-MIR164c,bna-MIR164c,bna-MIR164b,cln-MIR164,	ath-MIR164c	taacacttgaTGGAGAAGCAGGGCACGTGCGaacacaaatgaaatcgatcggtacttgttgatcatattttcgCACGTGTTCTACTACTCCAACacgtgtct	ath-miR164c-5p	TGGAGAAGCAGGGCACGTGCG	5'	Diff	gp2b	............((((((((....))))))))...	20	62.9	-17.6	0.8	5	0	8	0	0	0	5.14874	0	8.5848	0	0	0	low
37	34	csn-miR164b-p5_1ss22CT	TCATGTGCCCGTCTTCCCCATT	22	Sc0000493	+	277914	278008	TCATTTGCCCGTCTTCCCCATTttcatttttatgtaacaagaacgtttgtggagtggtttgctactccagtagttttcttaggggttggatgttt	2	cpa-MIR164b,rco-MIR164c,	cpa-MIR164b	TGGAGAAGCAGGGCACGTGCAttactaactcatgcacgattttttatatatacccgcacccaatgagttagttcttcatgtgcccgtcttccccatc	cpa-MIR164b-p5	tcatgtgcccgtcttccccatc	5'	New	gp2b	.........(((((.((((.....(((....)))....(((((..((..((((((((....))))))))..))..))))).))))..)))))...	83	40	-28.2	0.7	14	9	3	0	0	17	14.4165	7.74917	3.2193	0	0	13.4007	middle
38	35	csn-miR164b-p5	TCATGTGCCCGTCTTCCCCAT	21	Sc0000850	-	223747	223790	cctgtgTCATGTGCCCGTCTTCCTCATggtaggcacagcgcttc	2	cpa-MIR164b,rco-MIR164c,	cpa-MIR164b	TGGAGAAGCAGGGCACGTGCAttactaactcatgcacgattttttatatatacccgcacccaatgagttagttcttcatgtgcccgtcttccccatc	cpa-MIR164b-p5	tcatgtgcccgtcttccccat	5'	New	gp2b	...((((..((((((..((........))..))))))))))...	38	59.1	-15.3	0.6	243	203	253	94	140	169	250.229	174.787	271.494	121.922	139.284	133.218	middle
39	36	csn-miR164a_1ss13GT	TGGAGAAGCAGGTCACGTGAA	21	Sc0001408	+	143585	143615	TGGAGAAGCAGGACACGTGAAcggattcgga	1	hci-MIR164a,	hci-MIR164a	gttgaggaaattattgatcatgtttttttgagttgtctggaattcgaccgaatTGGAGAAGCAGGGCACGTGAAtcgaattggataggtttggaatgatcttgggtgactccaatggtggcagagaagtagcaaccccacccgaatccgtcctcgttagc	hci-miR164a	TGGAGAAGCAGGGCACGTGAA	5'	Diff	gp2b	..........(((..((....))..)))...	18	54.8	-4.8	0.3	15	6	0	0	0	0	15.4462	5.16611	0	0	0	0	middle
40	37	csn-miR164a-p3_2ss15CG18CG	TCATCATCTTCTTCGTCGTCC	21	Sc0001659	+	340819	340874	ccagaagattgtctttgttccatcgtcgcatcgtcTCATCATCTTCTTCGTCGTCC	1	osa-MIR164a,	osa-MIR164a	gtgagaaggaccgcgtTGGAGAAGCAGGGCACGTGCAtgcatatgttcatcatcatcttcttcctcctcctctagctccagccttgtgtgggttggaagtttagatagaactcgcactgcacgtggtctccttctccatcccggtctttttctcac	osa-MIR164a-p3	tcatcatcttcttcctcctcc	3'	New	gp2b	..(((((((((....(((.........)))......))..))))))).........	45	48.2	-4.9	0.2	10	8.5	8.5	8.5	8	17	10.2975	7.31866	9.12135	11.0248	7.95911	13.4007	middle
41	38	csn-miR164a-p5_2ss15CG18CG	TCATCATCTTCTTCGTCGTCC	21	Sc0001659	+	352006	352037	TCATCATCTTCTTCGTCGTCCctacgccgtca	1	osa-MIR164a,	osa-MIR164a	gtgagaaggaccgcgtTGGAGAAGCAGGGCACGTGCAtgcatatgttcatcatcatcttcttcctcctcctctagctccagccttgtgtgggttggaagtttagatagaactcgcactgcacgtggtctccttctccatcccggtctttttctcac	osa-MIR164a-p5	tcatcatcttcttcctcctcc	5'	New	gp2b	.............((.(((....))).))...	16	53.1	-1.7	0.1	10	8.5	8.5	8.5	8	17	10.2975	7.31866	9.12135	11.0248	7.95911	13.4007	middle
42	39	csn-miR164b-p5_2ss6CG21CT	CACACGTCTCTCTCTCTCTAT	21	Sc0002020	+	281133	281231	ctcatggCACACGTCTCTCTCTCTCTATcaaatagatgccgccggagaaggttttctctcatcactgatcaggaaggaaagattgaatcttgccgtctc	2	atr-MIR164b,osa-MIR408,	atr-MIR164b	ggtgagtgcaagagcccgtgcgggtggatgaacccctgtTGGAGAAGCAGGGCACGTGCAaacacacgtgctgtcctctttgcacgtgctccccttctccaacatgggtttcacacctctctctctctctact	atr-MIR164b-p5	cacacctctctctctctctac	5'	New	gp2b	...((((((((.((((.((..(((..((((....((((.....((((((....))))))))))..))))..)))..)).)))))).....))))))...	93	47.5	-23.1	0.5	0	0	2	0	2	2.5	0	0	2.1462	0	1.98978	1.97069	low
43	40	csn-miR164b-p3_2ss6CG21CT	CACACGTCTCTCTCTCTCTAT	21	Sc0005621	-	66118	66241	ataagagacgtttaaacgcctccaaatacagtggccacacgcgtgttctttttgaaacccttattttgaatctgacccttttttctctctcaacccttatacgCACACGTCTCTCTCTCTCTAT	3	atr-MIR164b,atr-MIR164b,osa-MIR408,	atr-MIR164b	ggtgagtgcaagagcccgtgcgggtggatgaacccctgtTGGAGAAGCAGGGCACGTGCAaacacacgtgctgtcctctttgcacgtgctccccttctccaacatgggtttcacacctctctctctctctact	atr-MIR164b-p3	cacacctctctctctctctac	3'	New	gp2b	...((((((((......(((............))).....((((((.....((((..................................)))).....))))))..))))))))..........	111	41.9	-21.565	0.4	0	0	2	0	2	2.5	0	0	2.1462	0	1.98978	1.97069	low
44	41	csn-miR165a-p5_2ss15AT19CT	TCGGACCAGGCTTCTTCCTC	20	xfSc0000150	-	11784	11831	caagttTCGGACCAAGCTTCTTCCTCggcaaaggagcaacgaaaccaa	7	ath-MIR165a,ath-MIR165b,aly-MIR165a,aly-MIR165b,lus-MIR166b,cme-MIR166i,bna-MIR166f,	ath-MIR165a	gttgaggGGAATGTTGTCTGGATCGAGGatattatagatatatacatgtgtatgttaatgattcaagtgatcatagagagtatccTCGGACCAGGCTTCATCCCCCccaac	ath-MIR165a-p5	TCGGACCAGGCTTCATCCCC	5'	New	gp2b	...((((((......(((((((........)))))))..))))))...	42	50	-12.5	0.5	3	4	6	0	0	0	3.08924	3.44407	6.4386	0	0	0	low
45	42	csn-miR166e-p5_2ss10GT17CT	TTGCTGTGATGAATGCTG	18	Sc0002732	-	213676	213706	tccgcTTGCTGTGATGATTGCTGTAagttgt	2	ppt-MIR166e,tae-MIR9777,	ppt-MIR166e	aatgtgcttttggagttgtgaaccttgctgtgaggaatgccgcatggaccgaagctatgtgctccatcttaacgtggtggtattgatactacgttTCGGACCAGGCTTCATTCCCCtcagcgcagtttcatcatggtgatggacgg	ppt-MIR166e-p5	ttgctgtgaggaatgccg	5'	New	gp2b	...((((((.(..(...)..).))))))...	25	45.2	-6.4	0.5	0	0	0	0	0	4	0	0	0	0	0	3.1531	low
45	43	csn-miR9777-p3_2ss4CT17TA	TGCTGTGATGATTGCTATA	19	Sc0002732	-	213676	213706	tccgcTTGCTGTGATGATTGCTGTAagttgt	2	ppt-MIR166e,tae-MIR9777,	tae-MIR9777	gctgtttttgtgccgtgatgattgctttacttctgacacctcttgtacgagaagcgccttgatgcgcttcgctgagcagattgcAGCAAACATATCTGAGCACAgtcacacgc	tae-MIR9777-p3	tgccgtgatgattgcttta	3'	New	gp2b	...((((((.(..(...)..).))))))...	25	45.2	-6.4	0.5	0	0	1.5	2.5	3	5	0	0	1.60965	3.2426	2.98467	3.94137	low
46	44	csn-miR166g-5p_2ss11CT21GA	GGAATGTTGTTTGGCTCGAGA	21	xpSc0057464	+	6135	6283	ataggaagtttctgctttgaggGGAATGTTGTTTGGCTCGAGAtcaccaacttgatgatcatccaaattcagtttcatttcatatgcatatgatcatctagctaatatCCTCGGACCAGGCTTCATTCCCCtcaatcaaagcttccatt	58	vvi-MIR166d,vvi-MIR166f,mtr-MIR166g,mtr-MIR166b,gma-MIR166t,gma-MIR166b,gma-MIR166u,gma-MIR166s,gma-MIR166n,gma-MIR166o,gma-MIR166q,gma-MIR166r,gma-MIR166j,gma-MIR166h,ptc-MIR166i,ptc-MIR166l,ath-MIR166c,ath-MIR166d,ath-MIR166a,ath-MIR166g,gra-MIR166c,gra-MIR166d,ppt-MIR166f,ppt-MIR166d,ppt-MIR166c,ppt-MIR166g,ppt-MIR166a,stu-MIR166c,mdm-MIR166d,aly-MIR166d,aly-MIR166c,aly-MIR166g,ppe-MIR166c,nta…	mtr-MIR166g	tttgaggGGAATGTTGTCTGGCTCGAGGacgctttcttctcgatctaatgcaaatttgtggtcatggattgtaaagtattcTCGGACCAGGCTTCATTCCCCccaat	mtr-miR166g-5p	GGAATGTTGTCTGGCTCGAGG	5'	Diff	gp2b	...((((((((.((..((((((((((((..(..(((..((((........((.(((((((((...........................))))))))).))........))))..)))..)..)))))))))))).))))))))))...	143	40.3	-56.3	0.9	18	48	29	8	10	15	18.5354	41.3289	31.1199	10.3763	9.94888	11.8241	middle
46	45	csn-miR166a_L+2R+2	CATCGGACCAGGCTTCATTCCCC	23	xpSc0057464	+	6135	6283	ataggaagtttctgctttgaggGGAATGTTGTTTGGCTCGAGAtcaccaacttgatgatcatccaaattcagtttcatttcatatgcatatgatcatctagctaatatCCTCGGACCAGGCTTCATTCCCCtcaatcaaagcttccatt	58	vvi-MIR166d,vvi-MIR166f,mtr-MIR166g,mtr-MIR166b,gma-MIR166t,gma-MIR166b,gma-MIR166u,gma-MIR166s,gma-MIR166n,gma-MIR166o,gma-MIR166q,gma-MIR166r,gma-MIR166j,gma-MIR166h,ptc-MIR166i,ptc-MIR166l,ath-MIR166c,ath-MIR166d,ath-MIR166a,ath-MIR166g,gra-MIR166c,gra-MIR166d,ppt-MIR166f,ppt-MIR166d,ppt-MIR166c,ppt-MIR166g,ppt-MIR166a,stu-MIR166c,mdm-MIR166d,aly-MIR166d,aly-MIR166c,aly-MIR166g,ppe-MIR166c,nta…	vvi-MIR166f	tgtagttgtggggaatgttggctggctcgaggctttcttgagtgattttatgtatacctcaaaaagctTCGGACCAGGCTTCATTCCcctcaacacactt	vvi-miR166a	TCGGACCAGGCTTCATTCC	3'	Diff	gp2b	...((((((((.((..((((((((((((..(..(((..((((........((.(((((((((...........................))))))))).))........))))..)))..)..)))))))))))).))))))))))...	143	40.3	-56.3	0.9	58.5	45	36	8	3	20	60.2402	38.7458	38.6316	10.3763	2.98467	15.7655	middle
47	46	csn-miR166m-p5_2ss12TC20CT	GCGGACCAGGCCTCATTCCTC	21	Sc0000327	+	630813	630863	GCGGACCAGGCCTCATTTCTCttccctggagggagggaatggtctggtaga	1	gma-MIR166m,	gma-MIR166m	tttcgttgcaaaggtgaggttgagaGGAATGTTGTCTGGCTCGAGGtcatggaggaggaggagagtattgagatgagtgaaagtttccaatggaaatttaccctcttaacacaaaaaaaaaaattgattcgCGGACCAGGCTTCATTCCCCacacccaacttttttttttattcct	gma-MIR166m-p5	gCGGACCAGGCTTCATTCCCC	5'	New	gp2b	....((((((((....(((.((((((....))))))))).))))))))...	44	58.8	-24.2	0.8	16	9	35	0	0	0	16.476	7.74917	37.5585	0	0	0	middle
48	47	csn-miR166g-5p_1ss1GA	AGAATGTTGTCTGGCTCGAGG	21	Sc0000684	-	286805	286947	gGGAATGTTGTCTGGCTCGAGGaccctttcttgatccatttctatcacagatccgtatatctatagatctgtatgtatttatacatatatgaaagattgtttgatcatgtgttagtgttgtcggaccaggcttcattcccccc	53	vvi-MIR166c,vvi-MIR166e,mtr-MIR166g,gma-MIR166b,gma-MIR166l,gma-MIR166a,gma-MIR166n,gma-MIR166m,gma-MIR166c,gma-MIR166o,gma-MIR166u,gma-MIR166q,ptc-MIR166a,ptc-MIR166j,ptc-MIR166k,ptc-MIR166q,ptc-MIR166c,stu-MIR166a,mdm-MIR166a,mdm-MIR166h,mdm-MIR166g,aly-MIR166c,aly-MIR166a,aly-MIR166d,ppe-MIR166e,ppe-MIR166d,nta-MIR166a,nta-MIR166d,nta-MIR166e,mes-MIR166d,mes-MIR166f,mes-MIR166g,lus-MIR166i,lus…	mtr-MIR166g	tttgaggGGAATGTTGTCTGGCTCGAGGacgctttcttctcgatctaatgcaaatttgtggtcatggattgtaaagtattcTCGGACCAGGCTTCATTCCCCccaat	mtr-miR166g-5p	GGAATGTTGTCTGGCTCGAGG	5'	Diff	gp2b	(((((((..((((((..(((..((.((....(((((....(((.(((((((((..((....))..))))))((((((....))))))..))).)))......)))))......)).))..)))..))))))..)))))))...	140	40.6	-47.5	0.8	0	0	5	3	0	2.5	0	0	5.3655	3.89112	0	1.97069	low
49	47	csn-miR166g-5p_1ss1GA	AGAATGTTGTCTGGCTCGAGG	21	Sc0002000	+	39392	39554	ataggaggcttctgctttgaggAGAATGTTGTCTGGCTCGAGGccaccaaaactgatgatcacccaatctctgtctctctctctctatatatagatccatatgtgatcatttgttagtgatctcggaccaggcttcattccccccaaatccgatcactccatt	53	vvi-MIR166c,vvi-MIR166e,mtr-MIR166g,gma-MIR166b,gma-MIR166a,gma-MIR166n,gma-MIR166m,gma-MIR166c,gma-MIR166l,gma-MIR166o,gma-MIR166u,gma-MIR166q,ptc-MIR166a,ptc-MIR166j,ptc-MIR166k,ptc-MIR166q,ptc-MIR166c,stu-MIR166a,mdm-MIR166a,mdm-MIR166h,mdm-MIR166g,aly-MIR166c,aly-MIR166a,aly-MIR166d,ppe-MIR166d,ppe-MIR166e,nta-MIR166d,nta-MIR166a,nta-MIR166e,mes-MIR166d,mes-MIR166f,mes-MIR166g,lus-MIR166i,lus…	mtr-MIR166g	tttgaggGGAATGTTGTCTGGCTCGAGGacgctttcttctcgatctaatgcaaatttgtggtcatggattgtaaagtattcTCGGACCAGGCTTCATTCCCCccaat	mtr-miR166g-5p	GGAATGTTGTCTGGCTCGAGG	5'	Diff	gp2b	...((((...((...((((.((.(((((..((((((..((((..(((...(((..((((((((......(((((................))))).......))))))))..))).)))..))))..))))))..))))).)).))))...))...))))...	157	45.4	-55.4	0.7	0	0	5	3	0	2.5	0	0	5.3655	3.89112	0	1.97069	low
50	48	csn-miR166d-p5_2ss10CG20AC	TCAACCCATGTTCTCCTTCC	20	Sc0004647	-	13718	13857	cacgtcttttttcgttcccacTCAACCCATGTTCTCCTTCCccgtctatccctcctgagctatccaaattagacttagcaaatcagaaaattgatcagtatttgtttgaaaggttggcttggtccaaccataaagattgt	1	vvi-MIR166d,	vvi-MIR166d	ctgctttgaggggattgttgtctggctcgaggccaccaaccatctttgattgattcaaatactttgatcagcttcaacccatcttctccttcaattcaattccaccctctgattatgtgttagtgcccTCGGACCAGGCTTCATTCCcctcaatcactgc	vvi-MIR166d-p5	tcaacccatcttctccttca	5'	New	gp2b	...((((((....(((.(((.((((((...........................((((((((.......))).)))))....(((((((((........)))).)))))..))))))..)))...)))...))))))...	134	41.4	-20.2	0.3	2	3.5	4.5	0	0	0	2.05949	3.01356	4.82895	0	0	0	low
51	48	csn-miR166d-p5_2ss10CG20AC	TCAACCCATGTTCTCCTTCC	20	xpSc0053385	-	104054	104194	cTCAACCCATGTTCTCCTTCCtttatttcttttaagaggatgttgtgcaacttggagtaaatcaaaagacaaatgttcttcatgttctctattgtattcaccatgtgcatataaaactaaattagaaggttataaggttat	1	vvi-MIR166d,	vvi-MIR166d	ctgctttgaggggattgttgtctggctcgaggccaccaaccatctttgattgattcaaatactttgatcagcttcaacccatcttctccttcaattcaattccaccctctgattatgtgttagtgcccTCGGACCAGGCTTCATTCCcctcaatcactgc	vvi-MIR166d-p5	tcaacccatcttctccttca	5'	New	gp2b	...((((..(((...(((((......(((((....)))))...((((((...(((.......(((.(((...(((.....)))....))).)))......)))..)))))).............)))))..))).))))..	136	31.9	-24.3	0.5	2	3.5	4.5	0	0	0	2.05949	3.01356	4.82895	0	0	0	low
52	49	csn-miR166c_1ss6CA	TCGGAACAGGCTTCATTCCTC	21	Sc0004972	-	37498	37602	cacccgaacaggttcaaaaagttcaaaacaaaccaaacagattttctatctgtctgaaacagttgcttatctgttggcacctatTCGGAACAGCCTTCATTCCTC	24	vvi-MIR166b,mtr-MIR166c,mtr-MIR166f,gma-MIR166k,stu-MIR166b,mes-MIR166j,lus-MIR166e,cme-MIR166e,tcc-MIR166c,sly-MIR166c,aqc-MIR166a,aqc-MIR166d,pab-MIR166a,hbr-MIR166a,ssl-MIR166a,dpr-MIR166a,osa-MIR166h,osa-MIR166g,osa-MIR166i,bdi-MIR166f,sbi-MIR166f,sbi-MIR166k,zma-MIR166m,zma-MIR166l,	mtr-MIR166f	tgtttggaatgaggtttgttccaagatcatcacacatcatgtttcttcttccctttcaataattcttgattaatttatgttcatacatctatatatatatctatatatattatcaagtcattacatgcatgggatgagatattgagagtgatcTCGGACCAGGCTTCATTCCTCacacc	mtr-miR166c	TCGGACCAGGCTTCATTCCTC	3'	Diff	gp2b	...(((((.(((((((.................((.((((((.....)))))).))..((((........))))))).)))).))))).................	85	41	-22.3	0.5	2	5.5	75	4	0	1.5	2.05949	4.7356	80.4825	5.18816	0	1.18241	middle
53	49	csn-miR166c_1ss6CA	TCGGAACAGGCTTCATTCCTC	21	xpSc0053375	+	45168	45225	tatctgtccgaacagttgcctagctgttggcacctatTCGGAACAGCCTTCATTCCTC	24	vvi-MIR166b,mtr-MIR166c,mtr-MIR166f,gma-MIR166k,stu-MIR166b,mes-MIR166j,lus-MIR166e,cme-MIR166e,tcc-MIR166c,sly-MIR166c,aqc-MIR166d,aqc-MIR166a,pab-MIR166a,hbr-MIR166a,ssl-MIR166a,dpr-MIR166a,osa-MIR166h,osa-MIR166i,osa-MIR166g,bdi-MIR166f,sbi-MIR166f,sbi-MIR166k,zma-MIR166m,zma-MIR166l,	mtr-MIR166f	tgtttggaatgaggtttgttccaagatcatcacacatcatgtttcttcttccctttcaataattcttgattaatttatgttcatacatctatatatatatctatatatattatcaagtcattacatgcatgggatgagatattgagagtgatcTCGGACCAGGCTTCATTCCTCacacc	mtr-miR166c	TCGGACCAGGCTTCATTCCTC	3'	Diff	gp2b	...(((((((((.((.((((........)))).)).)))))).)))............	43	50	-19	0.7	2	5.5	75	4	0	1.5	2.05949	4.7356	80.4825	5.18816	0	1.18241	middle
54	50	csn-miR166b-p3_2ss6CG17TA	TTATTGGATCTTTTGAAT	18	xfSc0001702	+	15611	15655	gcctcaaaagatccaatatatatacaTTATTGGATCTTTTGAATa	1	cme-MIR166b,	cme-MIR166b	ttgaggggaatgttgtctggctcgaggacacttttattcgatcttttgatttttgtgtttatatttagtgtcgTCGGACCAGGCTTCATTCCCCccaattaat	cme-MIR166b-p3	ttattcgatcttttgatt	3'	New	gp2b	...(((((((((((((((.........)))))))))))))))...	39	26.7	-19.1	1.6	0	0	2.5	2.5	3	1.5	0	0	2.68275	3.2426	2.98467	1.18241	low
55	50	csn-miR166b-p3_2ss6CG17TA	TTATTGGATCTTTTGAAT	18	xpSc0054936	+	3382	3426	gcctcaaaagatccaatatatatacaTTATTGGATCTTTTGAATa	1	cme-MIR166b,	cme-MIR166b	ttgaggggaatgttgtctggctcgaggacacttttattcgatcttttgatttttgtgtttatatttagtgtcgTCGGACCAGGCTTCATTCCCCccaattaat	cme-MIR166b-p3	ttattcgatcttttgatt	3'	New	gp2b	...(((((((((((((((.........)))))))))))))))...	39	26.7	-19.1	1.6	0	0	2.5	2.5	3	1.5	0	0	2.68275	3.2426	2.98467	1.18241	low
56	51	csn-miR166a_L+3R+2	CTATCGGACCAGGCTTCATTCCCC	24	xfSc0017196	+	1249	1379	tagggttgagaggaatgttgtctggctcgaggtcatggaggaggaagagctgatgatttctttaatttctttctttctgaaagtgaaaccctaaatgaCTCTCGGACCAGGCTTCATTCCCCccaaccagc	25	vvi-MIR166d,mtr-MIR166c,mtr-MIR166g,gma-MIR166b,gma-MIR166n,gma-MIR166o,gma-MIR166u,gma-MIR166q,ptc-MIR166m,ptc-MIR166q,ath-MIR166d,ath-MIR166c,ath-MIR166g,aly-MIR166c,aly-MIR166d,aly-MIR166g,mes-MIR166h,lus-MIR166e,lus-MIR166k,lus-MIR166f,cme-MIR166g,bna-MIR166d,smo-MIR166a,pvu-MIR166a,bdi-MIR166a,	vvi-MIR166d	ctgctttgaggggattgttgtctggctcgaggccaccaaccatctttgattgattcaaatactttgatcagcttcaacccatcttctccttcaattcaattccaccctctgattatgtgttagtgcccTCGGACCAGGCTTCATTCCcctcaatcactgc	vvi-miR166a	TCGGACCAGGCTTCATTCC	3'	Diff	gp2b	...(((((...((((((..((((((..(((((((((..(((..((((((........)))))).....(((((.....)))))......)))..))))).))))..))))))..))))))...)))))...	125	46.6	-52.1	0.9	9.5	3	0	0	0	0	9.7826	2.58306	0	0	0	0	low
57	52	csn-miR167a-p3_1	ATCATCTTGCAGCTTCAAT	19	Sc0000021	-	1168328	1168402	tgagatttggagctgacaatgcctttgggttgaaattctgattcaaaccaccATCATCTTGCAGCTACAATcata	2	gra-MIR167a,gra-MIR167b,	gra-MIR167a	tttgagaggttgaagctgccagcatgatctggtgattaacctagctatcactttttcttttttcctccctttttatgtatgttttttctgcctctttagtggtatatatgcagattgaaagaccagttttggattaaatttcttgagttatcttcagcctgcttgaactttatagcttcataggtatggtttcaacaTCAGATCATCTTGCAGCTTCAatcactcact	gra-MIR167a-p3	ATCATCTTGCAGCTTCAat	3'	New	gp2b	...((((...(((((.(((((....(((.(((((.......))))).)))....)))..)))))))..))))...	69	40	-16.3	0.5	2	0	2	0	2	0	2.05949	0	2.1462	0	1.98978	0	low
58	53	csn-miR167a_L-2R+2	AGATCATCTTGCAGCTTCAAT	21	Sc0002368	-	237725	237799	aaagattttgagttcgagctgcatagacacatggttctactAGATCATCTTGCAGCTTCAATcactcacttccca	12	gra-MIR167a,gra-MIR167b,lus-MIR167g,lus-MIR167f,lus-MIR167b,csi-MIR167c,osa-MIR167i,osa-MIR167e,bdi-MIR167d,sbi-MIR167c,zma-MIR167i,zma-MIR167h,	gra-MIR167b	tttgagaggttgaagctgccagcatgatctggtaatgggcctagctatcaccctttttttatttttgtattcttaggcctcttttatagtttttgtacaggtatgttaagttagattgtttatgaccggttttagatcaaaattcttttgagtccaagatgagtttttttctttctttctttcaggagaagtttatcaatcatttggttaagggcttttagagtcttagattaccaggcaacttagatgtgtttataaagaaccctgcctgtacttaagcttcataggttgtcggttcatactaTCAGATCATCTTGCAGCTTCAatcactcact	gra-miR167a	TCAGATCATCTTGCAGCTTCA	3'	Diff	gp2b	...((...(((((..((((((((.(((....(((((......)))))))))))))))).....)))))..))...	69	41.3	-18.7	0.6	1051.5	804	940.5	513	884	656.5	1082.78	692.259	1009.25	665.381	879.481	517.502	middle
59	53	csn-miR167a_L-2R+2	AGATCATCTTGCAGCTTCAAT	21	xpSc0053454	+	29773	29797	catcAGGTCATCTTGCAGCTTCAAT	10	vvi-MIR167a,gma-MIR167c,ath-MIR167d,gra-MIR167a,gra-MIR167b,aly-MIR167d,lus-MIR167b,csi-MIR167c,cca-MIR167,dpr-MIR167c,	gra-MIR167b	tttgagaggttgaagctgccagcatgatctggtaatgggcctagctatcaccctttttttatttttgtattcttaggcctcttttatagtttttgtacaggtatgttaagttagattgtttatgaccggttttagatcaaaattcttttgagtccaagatgagtttttttctttctttctttcaggagaagtttatcaatcatttggttaagggcttttagagtcttagattaccaggcaacttagatgtgtttataaagaaccctgcctgtacttaagcttcataggttgtcggttcatactaTCAGATCATCTTGCAGCTTCAatcactcact	gra-miR167a	TCAGATCATCTTGCAGCTTCA	3'	Diff	gp2b	...((((....))))..........	12	44	-1.2	0.1	1051.5	804	940.5	513	884	656.5	1082.78	692.259	1009.25	665.381	879.481	517.502	middle
60	54	csn-miR167k_R-3_1ss9CT	TGAAGCTGTCAGCCTGATC	19	xfSc0011573	-	554	593	ctcgctgcacatcaacgaaggTGAAACTGTCAGCCTGATC	1	gma-MIR167k,	gma-MIR167k	ctggtTGAAGCTGCCAGCCTGATCTTAacttttctcttttattaggaaaagatcagatcatgtggtagccttcacctagt	gma-miR167k	TGAAGCTGCCAGCCTGATCTTA	3'	Diff	gp2b	...((((.((((((.(....))))...)))))))......	31	52.5	-8.8	0.4	8	6.5	2.5	2	2	6	8.23798	5.59662	2.68275	2.59408	1.98978	4.72964	low
61	54	csn-miR167k_R-3_1ss9CT	TGAAGCTGTCAGCCTGATC	19	xpSc0053454	+	25791	25862	tttgagaggtTGAAGCTGTCAGCCTGATCtggtaagactgcccgagtccaaacccatcttctctctctctct	1	gma-MIR167k,	gma-MIR167k	ctggtTGAAGCTGCCAGCCTGATCTTAacttttctcttttattaggaaaagatcagatcatgtggtagccttcacctagt	gma-miR167k	TGAAGCTGCCAGCCTGATCTTA	5'	Diff	gp2b	...((((((..((((.((...(((......)))..((((.....))))......)).))))..))))))...	66	50	-19.3	0.5	8	6.5	2.5	2	2	6	8.23798	5.59662	2.68275	2.59408	1.98978	4.72964	low
62	55	csn-miR167a-p3_2	GATCATCTTGCAGCTTCAAT	20	xpSc0053454	+	28164	28249	ttttgagtcaattctaagcctccaactcttcaagtagaaacttgtttggtttcatcaGGTCATCTTGCAGCTTCAATcactcactc	10	vvi-MIR167a,gma-MIR167c,ath-MIR167d,gra-MIR167a,gra-MIR167b,aly-MIR167d,lus-MIR167b,csi-MIR167c,cca-MIR167,dpr-MIR167c,	gra-MIR167a	tttgagaggttgaagctgccagcatgatctggtgattaacctagctatcactttttcttttttcctccctttttatgtatgttttttctgcctctttagtggtatatatgcagattgaaagaccagttttggattaaatttcttgagttatcttcagcctgcttgaactttatagcttcataggtatggtttcaacaTCAGATCATCTTGCAGCTTCAatcactcact	gra-MIR167a-p3	GATCATCTTGCAGCTTCAat	3'	New	gp2b	...(((((.......((((....((((...(((((....)))))...))))....((((....))))..)))).....)))))...	80	39.5	-13.4	0.4	2	0	2	0	2	0	2.05949	0	2.1462	0	1.98978	0	low
63	56	csn-miR168c-3p_L+1R-1_1ss21AT	TCCCGCCTTGCATCAACTGAT	21	xpSc0053508	-	62778	62833	ggTCCCGCCTTGCATCAACTGAAtcggagactgccgtgaacttggtccgcggggac	28	vvi-MIR168,mtr-MIR168c,gma-MIR168b,gma-MIR168a,ptc-MIR168a,ptc-MIR168b,ath-MIR168a,mdm-MIR168a,mdm-MIR168b,aly-MIR168a,ppe-MIR168,nta-MIR168d,nta-MIR168a,nta-MIR168b,nta-MIR168e,nta-MIR168c,mes-MIR168a,lus-MIR168b,cme-MIR168,bra-MIR168b,bra-MIR168c,tcc-MIR168,sly-MIR168b,rco-MIR168,vun-MIR168,ccl-MIR168,crt-MIR168,atr-MIR168,	mtr-MIR168c	ctcacttcgcggtctctaatTCGCTTGGTGCAGGTCGGGAAccactacatccgctgttttcgtagaaaccggcggtgaattggatCCCGCCTTGCATCAACTGAATcggaggccgcggtgaatcta	mtr-miR168c-3p	CCCGCCTTGCATCAACTGAAT	5'	Diff	gp2b	..((((((...(.(((((......(((......))).....))))).)))))))..	52	62.5	-14.3	0.4	5	1.5	2.5	12.5	11	12	5.14874	1.29153	2.68275	16.213	10.9438	9.45929	middle
64	56	csn-miR168c-3p_L+1R-1_1ss21AT	TCCCGCCTTGCATCAACTGAT	21	xpSc0055496	-	28913	28960	attgattcgggggtgaattgggTCCCGCCTTGCATCAACTGAAtcgga	28	vvi-MIR168,mtr-MIR168c,gma-MIR168a,gma-MIR168b,ptc-MIR168a,ptc-MIR168b,ath-MIR168a,mdm-MIR168b,mdm-MIR168a,aly-MIR168a,ppe-MIR168,nta-MIR168d,nta-MIR168a,nta-MIR168e,nta-MIR168c,nta-MIR168b,mes-MIR168a,lus-MIR168b,cme-MIR168,bra-MIR168b,bra-MIR168c,tcc-MIR168,sly-MIR168b,rco-MIR168,vun-MIR168,ccl-MIR168,crt-MIR168,atr-MIR168,	mtr-MIR168c	ctcacttcgcggtctctaatTCGCTTGGTGCAGGTCGGGAAccactacatccgctgttttcgtagaaaccggcggtgaattggatCCCGCCTTGCATCAACTGAATcggaggccgcggtgaatcta	mtr-miR168c-3p	CCCGCCTTGCATCAACTGAAT	3'	Diff	gp2b	..((((((((.((((....(((.....)))..))))..))))))))..	44	52.1	-15.4	0.6	5	1.5	2.5	12.5	11	12	5.14874	1.29153	2.68275	16.213	10.9438	9.45929	middle
65	57	csn-miR169e_R-1_1ss21GT	TAGCCAAGGATGACTTGCCTT	21	Sc0003984	-	149556	149733	gagaggccttacatgaagataaagagtctaactgtttggTAGCCAAGGATGACTTGCCTGctccactccatccgatccgatacatatatatatatatatattgatcccttgtttggtttcAGGCAGTCTCCTTGGCTAACCtcactggctcttctctttcatgctagtccttctcttt	76	vvi-MIR169e,ptc-MIR169m,ptc-MIR169q,ptc-MIR169i,ptc-MIR169j,ptc-MIR169l,ath-MIR169j,ath-MIR169h,ath-MIR169i,ath-MIR169k,ath-MIR169m,stu-MIR169d,stu-MIR169b,stu-MIR169a,stu-MIR169f,stu-MIR169c,mdm-MIR169f,mdm-MIR169e,mdm-MIR169c,mdm-MIR169d,aly-MIR169l,aly-MIR169h,aly-MIR169j,aly-MIR169k,ppe-MIR169f,ppe-MIR169g,ppe-MIR169i,ppe-MIR169j,ppe-MIR169h,nta-MIR169t,mes-MIR169p,mes-MIR169s,mes-MIR169u,mes…	vvi-MIR169e	gtcttgtctgaTAGCCAAGGATGACTTGCCTGCcctatcccaagtgggtcaatttctttcttttttccaagtagtgtttgatatttgatatatcatgaatccggttgtttgggttccaggcagtcaccttggctaattttacaggctct	vvi-miR169e	TAGCCAAGGATGACTTGCCTGC	5'	Diff	gp2b	((((((.((..(((((((...(((((((.....((..((((((((((((.((((.(((((..(((...((...((((.((((.(((((....))))).))))))))...))..)))...))))))))))))))))))).))..)).)))))))...)))))))..)).))).)))...	175	42.7	-67.4	0.9	2.5	11	3.5	8	6	14.5	2.57437	9.4712	3.75585	10.3763	5.96933	11.43	middle
65	58	csn-miR169c-3p_L+2R+1_1ss19CA	AGGCAGTCTCCTTGGCTAACC	21	Sc0003984	-	149556	149733	gagaggccttacatgaagataaagagtctaactgtttggTAGCCAAGGATGACTTGCCTGctccactccatccgatccgatacatatatatatatatatattgatcccttgtttggtttcAGGCAGTCTCCTTGGCTAACCtcactggctcttctctttcatgctagtccttctcttt	76	vvi-MIR169e,ptc-MIR169m,ptc-MIR169q,ptc-MIR169i,ptc-MIR169j,ptc-MIR169l,ath-MIR169j,ath-MIR169h,ath-MIR169i,ath-MIR169k,ath-MIR169m,stu-MIR169d,stu-MIR169b,stu-MIR169a,stu-MIR169f,stu-MIR169c,mdm-MIR169f,mdm-MIR169e,mdm-MIR169c,mdm-MIR169d,aly-MIR169l,aly-MIR169h,aly-MIR169j,aly-MIR169k,ppe-MIR169f,ppe-MIR169g,ppe-MIR169i,ppe-MIR169j,ppe-MIR169h,nta-MIR169t,mes-MIR169p,mes-MIR169s,mes-MIR169u,mes…	stu-MIR169c	TAGCCAAGGATGACTTGCCTgctccatagtctaaaatgtgtttaatcaccttttagtttggtttcagGCAGTCTCCTTGGCTACC	stu-miR169c-3p	GCAGTCTCCTTGGCTACC	3'	Diff	gp2b	((((((.((..(((((((...(((((((.....((..((((((((((((.((((.(((((..(((...((...((((.((((.(((((....))))).))))))))...))..)))...))))))))))))))))))).))..)).)))))))...)))))))..)).))).)))...	175	42.7	-67.4	0.9	26	52.5	36	23.5	49	61.5	26.7734	45.2035	38.6316	30.4804	48.7495	48.4789	middle
66	57	csn-miR169e_R-1_1ss21GT	TAGCCAAGGATGACTTGCCTT	21	xpSc0054933	-	41858	41886	ttggTAGCCAAGGATGACTTGCCTGcagt	44	vvi-MIR169e,ptc-MIR169i,ptc-MIR169m,ptc-MIR169j,ptc-MIR169l,ath-MIR169h,ath-MIR169k,stu-MIR169d,stu-MIR169b,stu-MIR169c,stu-MIR169a,stu-MIR169f,mdm-MIR169f,mdm-MIR169e,aly-MIR169h,ppe-MIR169f,ppe-MIR169j,ppe-MIR169g,ppe-MIR169i,ppe-MIR169h,nta-MIR169t,mes-MIR169p,mes-MIR169s,mes-MIR169u,mes-MIR169aa,mes-MIR169o,lus-MIR169c,lus-MIR169k,lus-MIR169b,cme-MIR169n,cme-MIR169e,bna-MIR169i,bna-MIR169k,bn…	vvi-MIR169e	gtcttgtctgaTAGCCAAGGATGACTTGCCTGCcctatcccaagtgggtcaatttctttcttttttccaagtagtgtttgatatttgatatatcatgaatccggttgtttgggttccaggcagtcaccttggctaattttacaggctct	vvi-miR169e	TAGCCAAGGATGACTTGCCTGC	3'	Diff	gp2b	...((((.((((.....)))).))))...	23	51.7	-8.8	0.6	2.5	11	3.5	8	6	14.5	2.57437	9.4712	3.75585	10.3763	5.96933	11.43	middle
67	59	csn-miR169a_R-2	CAGCCAAGGATGACTTGCC	19	Sc0000067	+	605214	605352	CAGCCAAGGATGACTTGCCggcaagcttgccatgtatgtgtatgtttgttccaagtggaatctagtattattatatattatgaatccacaaatatgcaaataggtccgtcgcatacataagttgatcggcaagtcgttt	103	vvi-MIR169c,vvi-MIR169g,vvi-MIR169a,vvi-MIR169f,vvi-MIR169k,vvi-MIR169j,vvi-MIR169s,vvi-MIR169w,mtr-MIR169g,mtr-MIR169a,mtr-MIR169b,mtr-MIR169l,gma-MIR169b,gma-MIR169f,gma-MIR169g,gma-MIR169u,gma-MIR169v,gma-MIR169a,gma-MIR169m,ptc-MIR169h,ptc-MIR169g,ptc-MIR169f,ptc-MIR169e,ptc-MIR169d,ptc-MIR169b,ptc-MIR169c,ptc-MIR169p,ptc-MIR169a,ptc-MIR169s,ath-MIR169c,ath-MIR169a,ath-MIR169b,mdm-MIR169a,aly…	vvi-MIR169w	ggttatgtggtgCAGCCAAGGATGACTTGCCGGcaactccctttattgtactcatgcatgctcatacttatactgttgtgggcatcatttaagtggcaaaaatggtggtcggcgagtcattcttagctacatttctgcctcat	vvi-miR169a	CAGCCAAGGATGACTTGCCGG	5'	Diff	gp2b	........(((((((((((((..(((((...(((((((((..(((((((.....(((((.((((((((......)))))).)).)))))......))))))).......))))))))))))))..))))))))))))).	130	39.6	-51.2	0.9	0	0	4	7	5	8	0	0	4.2924	9.07927	4.97444	6.30619	low
68	60	csn-miR169e_R-3	TAGCCAAGGATGACTTGCC	19	Sc0000159	+	810872	810935	gcatgaagagatagagagtgaattgTAGCCAAGGATGACTTGCCgactcacatttgcttcaagt	126	vvi-MIR169e,vvi-MIR169x,ptc-MIR169r,ptc-MIR169i,ptc-MIR169m,ptc-MIR169j,ptc-MIR169w,ptc-MIR169v,ptc-MIR169k,ptc-MIR169l,ath-MIR169j,ath-MIR169i,ath-MIR169h,ath-MIR169k,ath-MIR169l,ath-MIR169m,ath-MIR169n,stu-MIR169e,stu-MIR169f,stu-MIR169c,stu-MIR169h,stu-MIR169g,stu-MIR169d,stu-MIR169b,stu-MIR169a,mdm-MIR169f,mdm-MIR169c,mdm-MIR169d,mdm-MIR169e,aly-MIR169l,aly-MIR169h,aly-MIR169i,aly-MIR169k,aly…	vvi-MIR169e	gtcttgtctgaTAGCCAAGGATGACTTGCCTGCcctatcccaagtgggtcaatttctttcttttttccaagtagtgtttgatatttgatatatcatgaatccggttgtttgggttccaggcagtcaccttggctaattttacaggctct	vvi-miR169e	TAGCCAAGGATGACTTGCCTGC	3'	Diff	gp2b	((.(((((...((((..((((.(((..((.(((.....)))))))).)))).))))))))).))	64	43.8	-12.2	0.4	0	1.5	2	0	2	0	0	1.29153	2.1462	0	1.98978	0	low
69	61	csn-miR169e	TAGCCAAGGATGACTTGCCTGC	22	Sc0000176	+	382957	382997	TAGCCAAGGATGACTTGCCTGCantcacaaagaataggaaa	126	vvi-MIR169e,vvi-MIR169x,ptc-MIR169i,ptc-MIR169m,ptc-MIR169j,ptc-MIR169l,ptc-MIR169k,ptc-MIR169r,ptc-MIR169w,ptc-MIR169v,ath-MIR169h,ath-MIR169k,ath-MIR169j,ath-MIR169i,ath-MIR169l,ath-MIR169m,ath-MIR169n,stu-MIR169c,stu-MIR169d,stu-MIR169b,stu-MIR169a,stu-MIR169e,stu-MIR169f,stu-MIR169h,stu-MIR169g,mdm-MIR169f,mdm-MIR169e,mdm-MIR169c,mdm-MIR169d,aly-MIR169h,aly-MIR169l,aly-MIR169i,aly-MIR169k,aly…	vvi-MIR169e	gtcttgtctgaTAGCCAAGGATGACTTGCCTGCcctatcccaagtgggtcaatttctttcttttttccaagtagtgtttgatatttgatatatcatgaatccggttgtttgggttccaggcagtcaccttggctaattttacaggctct	vvi-miR169e	TAGCCAAGGATGACTTGCCTGC	5'	Yes	gp2b	(((.((((.....)))).)))....................	21	41.5	-4.6	0.3	83	190.5	95	78	109	128	85.469	164.024	101.945	101.169	108.443	100.899	middle
70	62	csn-miR169x_R+1_2ss11TC21AC	TAGCCAAGGACGACTTGCCTCG	22	Sc0000230	+	1012719	1012862	gaagcaagttgattggctataaatagatctttgaaactaagtattggtatccaattggagcatgaaaatatgagtactaaaggaagagaggccttacatgaagataagagtcttgtttggTAGCCAAGGACGACTTGCCTCGtc	40	vvi-MIR169x,mtr-MIR169f,ptc-MIR169q,ptc-MIR169u,ptc-MIR169ae,ptc-MIR169af,ptc-MIR169ad,ptc-MIR169ac,ptc-MIR169w,ptc-MIR169v,ath-MIR169j,ath-MIR169i,ath-MIR169l,ath-MIR169n,mdm-MIR169c,mdm-MIR169d,aly-MIR169l,aly-MIR169i,aly-MIR169j,mes-MIR169q,mes-MIR169w,mes-MIR169y,mes-MIR169t,mes-MIR169v,mes-MIR169x,mes-MIR169z,mes-MIR169h,mes-MIR169r,lus-MIR169d,lus-MIR169a,rco-MIR169c,cca-MIR169a,pde-MIR169,…	vvi-MIR169x	gtctcgtctggTAGCCAAGGATGACTTGCCTAaatccaccaggtttcaaaacactgaatgtaattatccacaaagcgattccgtggtctttaggcagtcattccttcggctaaactgaccggctc	vvi-miR169x	TAGCCAAGGATGACTTGCCTA	3'	Diff	gp2b	((.((((((((.((((((((.......((((((..(((..(((((....(((....))).......))))).)))..))))))....(((((((((........)))).))))).....))))))))...)))))))).))...	141	38.9	-37.9	0.7	199	383	153	792	1055	3351	204.92	329.77	164.184	1027.26	1049.61	2641.51	high
71	63	csn-miR169g-p3_2ss12CT18GC	TTTGCTCCGGGTTTATCCA	19	Sc0000502	-	782228	782256	tttgggccctTTTGCTCCGGGCTTATCCA	1	lus-MIR169g,	lus-MIR169g	gccgtcaatgtaaaagggagaaatgtaatgtgCAGCCAAGGATGACTTGCCGAtcgacccgcgaacccaatttgctccgggcttatcgatcgattgatattgatggatcggcaagttggtccttggctacatcttcttttttcccttcatctcatccttggc	lus-MIR169g-p3	tttgctccgggcttatcga	3'	New	gp2b	....(((((.........)))))......	19	55.2	-7.7	0.5	0	0	1.5	2	2	0	0	0	1.60965	2.59408	1.98978	0	low
72	63	csn-miR169g-p3_2ss12CT18GC	TTTGCTCCGGGTTTATCCA	19	Sc0002293	-	150920	151029	ctctggcccccgacattggtatgagcgacttcccgcaaaggtccgcacttcggttgatgctgctggctttgggccctTTTGCTCCGGGTTTATCCAgatgagggccgagt	1	lus-MIR169g,	lus-MIR169g	gccgtcaatgtaaaagggagaaatgtaatgtgCAGCCAAGGATGACTTGCCGAtcgacccgcgaacccaatttgctccgggcttatcgatcgattgatattgatggatcggcaagttggtccttggctacatcttcttttttcccttcatctcatccttggc	lus-MIR169g-p3	tttgctccgggcttatcga	3'	New	gp2b	(((.(((((.((...((((.((((((.....((.((((((((((((....((((....))))...))...)))))..)))))...)))))))))))).)).)))))))).	109	59.1	-36.1	0.6	0	0	1.5	2	2	0	0	0	1.60965	2.59408	1.98978	0	low
73	64	csn-miR169d-p3_1ss9CA	AAGTTGTCATTGGCTACATT	20	Sc0000680	-	60702	60828	aaaattcaatggaggcatagagctgttgaaagccgaagcgtgggttttagaaatggagaagttgtttaaggttttttcttacaccgacgctcagAAGGTGTCATTGGCTACATTcacattggatgac	6	vvi-MIR169d,vvi-MIR169c,vvi-MIR169a,ppe-MIR169a,ppe-MIR169b,mes-MIR169f,	vvi-MIR169d	gagtggaatgCAGCCAAGAATGATTTGCCGGaatttatatatagtgagaagagaagaggctataggctttcacatatatagtgaaccctggcaagttgtccttggctacatttgattctc	vvi-MIR169d-p3	aagttgtccttggctacatt	3'	New	gp2b	...(((((((((((......((((..(((..(((..(((((.(((...(((((.....................)))))...))).))))).....))).)))..))))...))).))))))))...	121	41.7	-33.6	0.6	0	0	0	1.5	6	1.5	0	0	0	1.94556	5.96933	1.18241	low
74	65	csn-miR169c-p3_2ss10CA21TC	CAAGTTGTCATTGGCTACATC	21	Sc0000684	-	445588	445658	gcagttgtttcctccacattagtgcccatgatCAAGTTTTCATTGGCTACATCccttggatttgccacatt	11	vvi-MIR169c,vvi-MIR169d,vvi-MIR169g,vvi-MIR169a,ppe-MIR169a,ppe-MIR169b,mes-MIR169g,mes-MIR169f,tcc-MIR169e,osa-MIR169b,ata-MIR169d,	vvi-MIR169c	gggagtagaatgCAGCCAAGGATGACTTGCCGGagatggggcattcctcgttaatccggcaagttgtccttggctacattgggctctctt	vvi-MIR169c-p3	caagttgtccttggctacatt	3'	New	gp2b	...((.((....((((.....(((((.((((........)))).))).))......))))...)).))...	65	43.7	-13.1	0.4	37.5	53.5	28.5	27	53	28.5	38.6155	46.0645	30.5834	35.0201	52.7291	22.4658	middle
75	65	csn-miR169c-p3_2ss10CA21TC	CAAGTTGTCATTGGCTACATC	21	xpSc0053441	-	92082	92123	gtagagagaaccggCAAGTTGTCATTGGCTACATCtctctct	12	vvi-MIR169c,vvi-MIR169d,vvi-MIR169g,vvi-MIR169a,ppe-MIR169b,ppe-MIR169a,mes-MIR169g,mes-MIR169f,tcc-MIR169e,ghr-MIR169b,osa-MIR169b,ata-MIR169d,	vvi-MIR169c	gggagtagaatgCAGCCAAGGATGACTTGCCGGagatggggcattcctcgttaatccggcaagttgtccttggctacattgggctctctt	vvi-MIR169c-p3	caagttgtccttggctacatt	3'	New	gp2b	..(((((((...(((.(((....))).)))...)))))))..	38	47.6	-11	0.6	37.5	53.5	28.5	27	53	28.5	38.6155	46.0645	30.5834	35.0201	52.7291	22.4658	middle
76	66	csn-miR169c-p3_2ss12GC17TG	TAAAAGTTACTCTAGGGA	18	Sc0002374	+	38175	38225	gaaggcccatcgcccaagggtTAAAAGTTACTCTAGGGAtaataggccgaa	1	bna-MIR169c,	bna-MIR169c	agatgaatagaagaatcatatttggTAGCCAAGGATGACTTGCCTAtttcttgagagtaaaatgggcatggtgtcatgttaaaagttactgtaggtagtttcaatttgaccattttccttacaaatgatattaggcagtctccttggctatccttatatgttcttctctctcatct	bna-MIR169c-p3	taaaagttactgtaggta	3'	New	gp2b	...((((.((..(((.(((((........))))).)))...)).))))...	45	49	-18.4	0.7	3	5	6.5	5	7.5	3.5	3.08924	4.30509	6.97515	6.4852	7.46166	2.75896	low
77	66	csn-miR169c-p3_2ss12GC17TG	TAAAAGTTACTCTAGGGA	18	xpSc0053869	+	112779	112829	gaaggcctgtcgctcaagggtTAAAAGTTACTCTAGGGAtaataggccgaa	1	bna-MIR169c,	bna-MIR169c	agatgaatagaagaatcatatttggTAGCCAAGGATGACTTGCCTAtttcttgagagtaaaatgggcatggtgtcatgttaaaagttactgtaggtagtttcaatttgaccattttccttacaaatgatattaggcagtctccttggctatccttatatgttcttctctctcatct	bna-MIR169c-p3	taaaagttactgtaggta	3'	New	gp2b	...(((((((..(((.(((((........))))).)))...)))))))...	45	47.1	-19.9	0.8	3	5	6.5	5	7.5	3.5	3.08924	4.30509	6.97515	6.4852	7.46166	2.75896	low
78	67	csn-miR169i-p3_1ss6GA	AGGCAATCTCCTTGGCTAAC	20	Sc0004948	+	60223	60255	tgtttggtttgAGGCAATCTCCTTGGCTAACta	62	ptc-MIR169i,ptc-MIR169l,ptc-MIR169q,ptc-MIR169m,ptc-MIR169j,ath-MIR169j,ath-MIR169i,ath-MIR169h,ath-MIR169k,ath-MIR169m,ath-MIR169l,ath-MIR169n,stu-MIR169c,stu-MIR169b,stu-MIR169a,mdm-MIR169c,mdm-MIR169d,aly-MIR169l,aly-MIR169h,aly-MIR169k,aly-MIR169j,aly-MIR169n,ppe-MIR169j,mes-MIR169o,mes-MIR169q,mes-MIR169w,mes-MIR169y,mes-MIR169v,cme-MIR169e,cme-MIR169i,cme-MIR169c,cme-MIR169n,bna-MIR169i,bna…	ptc-MIR169i	tcttgtttggTAGCCAAGGATGACTTGCCTGctccattgtaggaggtttccgaaaaaatgcagacatgtataatttcgaaacccctgtttcgtttcaggcagtctccttggctaacttgactg	ptc-MIR169i-p3	aggcagtctccttggctaac	3'	New	gp2b	...((((.(..(((......)))..)))))...	27	42.4	-6.3	0.5	151.5	185	163	1485	3408.5	3981	156.007	159.288	174.915	1926.1	3391.08	3138.12	high
79	67	csn-miR169i-p3_1ss6GA	AGGCAATCTCCTTGGCTAAC	20	Sc0004948	+	63050	63082	tgtttggtttgAGGCAATCTCCTTGGCTAACta	25	ptc-MIR169i,ath-MIR169i,ath-MIR169m,mdm-MIR169c,mdm-MIR169d,aly-MIR169k,aly-MIR169n,mes-MIR169o,mes-MIR169q,mes-MIR169w,mes-MIR169y,cme-MIR169i,cme-MIR169c,bna-MIR169e,bna-MIR169c,aqc-MIR169b,osa-MIR169g,osa-MIR169j,osa-MIR169m,bdi-MIR169e,bdi-MIR169g,sbi-MIR169f,zma-MIR169k,zma-MIR169h,ata-MIR169i,	ptc-MIR169i	tcttgtttggTAGCCAAGGATGACTTGCCTGctccattgtaggaggtttccgaaaaaatgcagacatgtataatttcgaaacccctgtttcgtttcaggcagtctccttggctaacttgactg	ptc-MIR169i-p3	aggcagtctccttggctaac	3'	New	gp2b	...((((.(..(((......)))..)))))...	27	42.4	-6.3	0.5	151.5	185	163	1485	3408.5	3981	156.007	159.288	174.915	1926.1	3391.08	3138.12	high
80	68	csn-miR169b-p3_1ss8TC	TCTCATGCTAGGCCTTCTCTTC	22	Sc0004948	+	60275	60330	gctaggccttctcttcttccctgcagcacttctcTCTCATGCTAGGCCTTCTCTTC	1	atr-MIR169b,	atr-MIR169b	tgagctaagggcacagaagtagagcctcacatggaggggtgcaatgtgctagggTAGCCAAGGATGACTTGCCTttgatcacaatgtgtgagagagtgaaatggttctccaccagtgctttatgAGCAAGTCGCCTTGGCTAACCtaaggatcttgcctctcatgttaggccttctcttcttattca	atr-MIR169b-p3	tctcatgttaggccttctcttc	3'	New	gp2b	...((((((...............((((...........)))))))))).......	46	53.6	-8.9	0.3	0	0	0	6	6	11	0	0	0	7.78224	5.96933	8.67102	low
81	69	csn-miR169e_1ss21GC	TAGCCAAGGATGACTTGCCTCC	22	xpSc0053579	+	10643	10680	taagagtcttgtttggTAGCCAAGGATGACTTGCCTCC	179	vvi-MIR169e,vvi-MIR169x,vvi-MIR169o,vvi-MIR169g,vvi-MIR169l,vvi-MIR169s,vvi-MIR169w,vvi-MIR169m,vvi-MIR169n,vvi-MIR169p,vvi-MIR169y,vvi-MIR169q,mtr-MIR169f,mtr-MIR169a,mtr-MIR169g,mtr-MIR169l,gma-MIR169p,gma-MIR169v,gma-MIR169c,gma-MIR169h,gma-MIR169f,gma-MIR169a,gma-MIR169e,ptc-MIR169i,ptc-MIR169m,ptc-MIR169k,ptc-MIR169r,ptc-MIR169j,ptc-MIR169l,ptc-MIR169o,ptc-MIR169w,ptc-MIR169v,ptc-MIR169h,ptc…	vvi-MIR169e	gtcttgtctgaTAGCCAAGGATGACTTGCCTGCcctatcccaagtgggtcaatttctttcttttttccaagtagtgtttgatatttgatatatcatgaatccggttgtttgggttccaggcagtcaccttggctaattttacaggctct	vvi-miR169e	TAGCCAAGGATGACTTGCCTGC	3'	Diff	gp2b	...(((((...(((((...)))))...)))))......	29	47.4	-7.4	0.4	60.5	70.5	40	196	433.5	657.5	62.2997	60.7018	42.924	254.22	431.284	518.29	middle
82	69	csn-miR169e_1ss21GC	TAGCCAAGGATGACTTGCCTCC	22	xpSc0053579	-	8556	8593	taagagtcttgtttggTAGCCAAGGATGACTTGCCTCC	196	vvi-MIR169e,vvi-MIR169x,vvi-MIR169o,vvi-MIR169g,vvi-MIR169l,vvi-MIR169s,vvi-MIR169w,vvi-MIR169m,vvi-MIR169n,vvi-MIR169p,vvi-MIR169y,vvi-MIR169q,mtr-MIR169f,mtr-MIR169a,mtr-MIR169g,mtr-MIR169l,gma-MIR169p,gma-MIR169v,gma-MIR169c,gma-MIR169h,gma-MIR169f,gma-MIR169a,gma-MIR169e,ptc-MIR169i,ptc-MIR169m,ptc-MIR169k,ptc-MIR169r,ptc-MIR169j,ptc-MIR169l,ptc-MIR169o,ptc-MIR169w,ptc-MIR169v,ptc-MIR169h,ptc…	vvi-MIR169e	gtcttgtctgaTAGCCAAGGATGACTTGCCTGCcctatcccaagtgggtcaatttctttcttttttccaagtagtgtttgatatttgatatatcatgaatccggttgtttgggttccaggcagtcaccttggctaattttacaggctct	vvi-miR169e	TAGCCAAGGATGACTTGCCTGC	3'	Diff	gp2b	...(((((...(((((...)))))...)))))......	29	47.4	-7.4	0.4	60.5	70.5	40	196	433.5	657.5	62.2997	60.7018	42.924	254.22	431.284	518.29	middle
83	70	csn-miR171e	TGATTGAGCCGCGCCAATATC	21	Sc0001137	+	183016	183061	acacaggggagagctggTGATTGAGCCGCGCCAATATCccttgcgc	24	vvi-MIR171e,ath-MIR171a,mdm-MIR171e,mdm-MIR171c,mdm-MIR171d,aly-MIR171a,cme-MIR171a,cme-MIR171e,cme-MIR171g,bra-MIR171e,bna-MIR171f,bna-MIR171g,tcc-MIR171a,sly-MIR171c,csi-MIR171a,ccl-MIR171,atr-MIR171c,atr-MIR171a,osa-MIR171a,bdi-MIR171a,sbi-MIR171j,sbi-MIR171g,zma-MIR171n,zma-MIR171a,	vvi-MIR171e	ggaaagtaagcgatgttggtgaggttcaatccgaagacggatttacgaagagccgtaaagaacgatctcTGATTGAGCCGCGCCAATATCactttctgctaag	vvi-miR171e	TGATTGAGCCGCGCCAATATC	3'	Yes	gp2b	...(((((((....(((((.........)))))...)))))))...	40	60.9	-16.1	0.6	5	5	3	0	0	0	5.14874	4.30509	3.2193	0	0	0	low
84	70	csn-miR171e	TGATTGAGCCGCGCCAATATC	21	Sc0003303	+	174146	174180	ggTGATTGAGCCGCGCCAATATCgattgcgcgaga	25	vvi-MIR171e,ath-MIR171a,mdm-MIR171e,mdm-MIR171c,mdm-MIR171d,aly-MIR171a,cme-MIR171g,cme-MIR171a,cme-MIR171e,bra-MIR171e,bna-MIR171f,bna-MIR171g,tcc-MIR171a,sly-MIR171c,csi-MIR171a,ccl-MIR171,atr-MIR171c,atr-MIR171a,osa-MIR171a,bdi-MIR171a,sbi-MIR171j,sbi-MIR171g,zma-MIR171n,zma-MIR171a,zma-MIR171i,	vvi-MIR171e	ggaaagtaagcgatgttggtgaggttcaatccgaagacggatttacgaagagccgtaaagaacgatctcTGATTGAGCCGCGCCAATATCactttctgctaag	vvi-miR171e	TGATTGAGCCGCGCCAATATC	5'	Yes	gp2b	...........(((((.(((....))))))))...	21	57.1	-8.4	0.4	5	5	3	0	0	0	5.14874	4.30509	3.2193	0	0	0	low
85	71	csn-miR171a_L+2_1ss14CT	GGTGATTGAGCCGTGCCAATATC	23	xfSc0002018	-	16960	16997	ggagagagctGGTGATTGAGCCGCGCCAATATCtcttg	2	bdi-MIR171a,zma-MIR171i,	bdi-MIR171a	gaggtaggaggcggagcggaggaaaggcttcccgaccgggggaagctggTGATTGAGCCGCGCCAATATCtctcgcgcgccagtggaattgccggcttcagctgctttcgccgccgcagc	bdi-miR171a	TGATTGAGCCGCGCCAATATC	3'	Diff	gp2b	.((((((..(((((.........)))))...)))))).	36	55.3	-12.2	0.6	5	4.5	1.5	0	0	0	5.14874	3.87458	1.60965	0	0	0	low
86	72	csn-miR172e-p3_1ss16CT	TTTGTTTTTGCCTCTTGATCC	21	Sc0000072	+	1026174	1026291	ttcaacaaactgtttattttcagattcgagtacttcaaacacctttctcagtttctccatttctttctttgtattgctcatcttttccatcatttcgTTTGTTTTTGCCTCTTGATCC	1	aly-MIR172e,	aly-MIR172e	gccagtagtcgcagatGCAGCACCATTAAGATTCACaagagatgtggttccctttgtttttgcctctcgatccgaagaaaagggttcctttcgagtggGAATCTTGATGATGCTGCATcagcaaatacatggc	aly-MIR172e-p3	tttgtttttgcctctcgatcc	3'	New	gp2b	...(((((((...........((((..(((((...((((............................))))...))))))))).............)))))))...............	100	33.9	-9	0.2	2	3.5	1.5	0	1.5	2	2.05949	3.01356	1.60965	0	1.49233	1.57655	low
87	73	csn-miR172k_1ss5TA	TGAAACTTGATGATGCTGCAT	21	Sc0000095	-	684946	684984	TGAAACTTGATGATGCTGCACaaagccttggcggtaagc	1	gma-MIR172k,	gma-MIR172k	ttgtttgcggatgtagcaccatcaagattcacatgcaaatgaaggtgggtgggactatgatgcaatctaagtgctctgccaatccattggtattttttggtggTGAATCTTGATGATGCTGCATcagccataaa	gma-miR172k	TGAATCTTGATGATGCTGCAT	5'	Diff	gp2b	.............((((((.(((....)))))))))...	23	48.7	-8.1	0.4	0	0	3.5	1.5	0	0	0	0	3.75585	1.94556	0	0	low
88	73	csn-miR172k_1ss5TA	TGAAACTTGATGATGCTGCAT	21	Sc0000095	-	691238	691333	gtaaTGAAACTTGATGATGCTGCACaaagccttggcggtaagcttacatacttggaaaaaaccgttcctagctgcatccttgggaaaattcatata	1	gma-MIR172k,	gma-MIR172k	ttgtttgcggatgtagcaccatcaagattcacatgcaaatgaaggtgggtgggactatgatgcaatctaagtgctctgccaatccattggtattttttggtggTGAATCTTGATGATGCTGCATcagccataaa	gma-miR172k	TGAATCTTGATGATGCTGCAT	5'	Diff	gp2b	...(((((.((..(.(((((.((.....((....)).................((((.......))))..)).))))).)..))....)))))...	90	40.6	-20.6	0.5	0	0	3.5	1.5	0	0	0	0	3.75585	1.94556	0	0	low
89	74	csn-miR172c	GGAATCTTGATGATGCTGCAG	21	Sc0001099	-	617532	617645	atatgGGAATCTTGATGATGCTGCAGcggcaataaagggctaatttattacttttatttttattattttgtacttttttgtttttgtttttgtttttgtttttgattctcaaaa	17	vvi-MIR172c,gma-MIR172c,gma-MIR172d,gma-MIR172e,ptc-MIR172h,ptc-MIR172g,stu-MIR172d,mdm-MIR172l,ppe-MIR172d,mes-MIR172e,mes-MIR172f,lus-MIR172e,lus-MIR172i,cme-MIR172a,tcc-MIR172a,rco-MIR172,csi-MIR172c,	vvi-MIR172c	gtttgcggatggagcatcatcaagattcacaagtattgagactcagtgcgtggtggtgatggtgacttttgtggtcccttcctacactccgatggctctttgatgtgGGAATCTTGATGATGCTGCAGcggcaataaa	vvi-miR172c	GGAATCTTGATGATGCTGCAG	5'	Yes	gp2b	...((((((((..((..(.((.((((..((((.((((..(.............................)..)))).))))..))))....))..)..))...))))))))...	108	25.4	-19.5	0.7	6	8	7	3	4.5	4.5	6.17848	6.88815	7.5117	3.89112	4.477	3.54723	low
90	74	csn-miR172c	GGAATCTTGATGATGCTGCAG	21	Sc0002953	-	198984	199046	CGAATCTTGATGATGCTGCAGtagagaacacaaggaccttgtagcttctacttcaccgttgaa	17	vvi-MIR172c,gma-MIR172d,gma-MIR172e,gma-MIR172c,ptc-MIR172h,ptc-MIR172g,stu-MIR172d,mdm-MIR172l,ppe-MIR172d,mes-MIR172e,mes-MIR172f,lus-MIR172i,lus-MIR172e,cme-MIR172a,tcc-MIR172a,rco-MIR172,csi-MIR172c,	vvi-MIR172c	gtttgcggatggagcatcatcaagattcacaagtattgagactcagtgcgtggtggtgatggtgacttttgtggtcccttcctacactccgatggctctttgatgtgGGAATCTTGATGATGCTGCAGcggcaataaa	vvi-miR172c	GGAATCTTGATGATGCTGCAG	5'	Yes	gp2b	...........((((.((.(((((((...(((((...)))))...))))))).)).))))...	49	44.4	-13.2	0.5	6	8	7	3	4.5	4.5	6.17848	6.88815	7.5117	3.89112	4.477	3.54723	low
91	75	csn-miR172e-p5_2ss15CG19TA	ATTGGAACGATACAGAGAA	19	Sc0001513	+	192016	192131	ATTGGAACGATACAGAGAAgattagcatggcccctgcgcaaggatgacacgcacaaatcgagaaatggtctgaatttttttggcctttttgccctcgcattaatttttttctgcca	2	nta-MIR172e,nta-MIR172f,	nta-MIR172e	gtttgcagatgtagcatcatcaagattcacataaaaaacgcatggtgatgagctgatgaaatgacattaatggccaaggcagctttctgaaggtgAGAATCTTGATGATGCTGCATcagcaataaacgactacctgatttatcattatgccattggaacgatacacagataattagcataattcatgtgcaagaatgccacgggtacatggtatggttcaattgatacagtcgttgtttgcgggtgtagcatcatcaagattcacatgaaaaggcaaggtgaaatgaaattaattaagagccatggctttttgaaggtgAGAATCTTGATGATGCTGCATcagcaataa	nta-MIR172e-p5	attggaacgatacacagat	5'	New	gp2b	............(((((((((...((.((...(((.....)))....)).))...((((((((((.((.(..((....))..))).)))....)))).)))...)))))))))...	101	43.1	-21.2	0.4	1.5	0	0	1.5	2	2.5	1.54462	0	0	1.94556	1.98978	1.97069	low
92	76	csn-miR172c-p3_1ss9TC	TGGGAATCCTGATGATGCTGC	21	Sc0001539	+	253502	253562	ggtgtagccaattttggggttgggtagttatctgttgTGGGAATCCTGATGATGCTGCatc	47	vvi-MIR172c,mtr-MIR172a,gma-MIR172i,gma-MIR172d,gma-MIR172e,gma-MIR172c,gma-MIR172l,ptc-MIR172h,ptc-MIR172d,ptc-MIR172e,ptc-MIR172g,ath-MIR172e,gra-MIR172a,stu-MIR172d,mdm-MIR172l,mdm-MIR172i,mdm-MIR172j,mdm-MIR172k,aly-MIR172e,ppe-MIR172c,ppe-MIR172d,nta-MIR172j,mes-MIR172e,mes-MIR172f,lus-MIR172i,lus-MIR172e,lus-MIR172g,cme-MIR172a,cme-MIR172d,bra-MIR172d,bna-MIR172b,bna-MIR172c,tcc-MIR172d,tcc…	vvi-MIR172c	gtttgcggatggagcatcatcaagattcacaagtattgagactcagtgcgtggtggtgatggtgacttttgtggtcccttcctacactccgatggctctttgatgtgGGAATCTTGATGATGCTGCAGcggcaataaa	vvi-MIR172c-p3	tgGGAATCTTGATGATGCTGC	3'	New	gp2b	((((((((.....(..((((((((......)))........)))))..)....))))))))	61	47.5	-16.7	0.6	5.5	14	8	19.5	23	19	5.66361	12.0543	8.5848	25.2923	22.8824	14.9772	middle
93	76	csn-miR172c-p3_1ss9TC	TGGGAATCCTGATGATGCTGC	21	Sc0002661	+	203333	203379	gtagttatctgctgTGGGAATCCTGATGATGCTGCagcagttgcaaa	47	vvi-MIR172c,mtr-MIR172a,gma-MIR172i,gma-MIR172d,gma-MIR172e,gma-MIR172c,gma-MIR172l,ptc-MIR172h,ptc-MIR172d,ptc-MIR172e,ptc-MIR172g,ath-MIR172e,gra-MIR172a,stu-MIR172d,mdm-MIR172l,mdm-MIR172i,mdm-MIR172j,mdm-MIR172k,aly-MIR172e,ppe-MIR172c,ppe-MIR172d,nta-MIR172j,mes-MIR172e,mes-MIR172f,lus-MIR172i,lus-MIR172e,lus-MIR172g,cme-MIR172a,cme-MIR172d,bra-MIR172d,bna-MIR172b,bna-MIR172c,tcc-MIR172d,tcc…	vvi-MIR172c	gtttgcggatggagcatcatcaagattcacaagtattgagactcagtgcgtggtggtgatggtgacttttgtggtcccttcctacactccgatggctctttgatgtgGGAATCTTGATGATGCTGCAGcggcaataaa	vvi-MIR172c-p3	tgGGAATCTTGATGATGCTGC	3'	New	gp2b	...((...((((((..(..(((.....))).)..))))))..))...	41	46.8	-15.9	0.7	5.5	14	8	19.5	23	19	5.66361	12.0543	8.5848	25.2923	22.8824	14.9772	middle
94	77	csn-miR172e-p3_2ss15CG19TA	ATTGGAACGATACAGAGAA	19	Sc0001642	+	231771	231916	aaagtcagtctgattgatgtcgtcccagtcccacatcgaaactttgacgtgatagacatggagtttataagaaagaagaaaagagaagacattgtcccttcggggacatccgataaaATTGGAACGATACAGAGAAgattagcatg	2	nta-MIR172e,nta-MIR172f,	nta-MIR172e	gtttgcagatgtagcatcatcaagattcacataaaaaacgcatggtgatgagctgatgaaatgacattaatggccaaggcagctttctgaaggtgAGAATCTTGATGATGCTGCATcagcaataaacgactacctgatttatcattatgccattggaacgatacacagataattagcataattcatgtgcaagaatgccacgggtacatggtatggttcaattgatacagtcgttgtttgcgggtgtagcatcatcaagattcacatgaaaaggcaaggtgaaatgaaattaattaagagccatggctttttgaaggtgAGAATCTTGATGATGCTGCATcagcaataa	nta-MIR172e-p3	attggaacgatacacagat	3'	New	gp2b	...(..(((((..((..((((((.(((((.....((((...((((......((((((.....))))))......))))..............((((((....))))))..))))...))))).))))))..))..)))))..)...	140	41.1	-41	0.7	1.5	0	0	1.5	2	2.5	1.54462	0	0	1.94556	1.98978	1.97069	low
95	78	csn-miR172e-p5_2ss1CT17CT	TTTTGTTTTTGCCTCTTGATC	21	Sc0002931	+	107566	107686	TTTTGTTTTTGCCTCTTGATCctcttctatttttgcattgtttccctgtttttcttcagttcttcaaccaatgccatattctcacttttcagcctcttgttttccttttgaagatcaatga	1	aly-MIR172e,	aly-MIR172e	gccagtagtcgcagatGCAGCACCATTAAGATTCACaagagatgtggttccctttgtttttgcctctcgatccgaagaaaagggttcctttcgagtggGAATCTTGATGATGCTGCATcagcaaatacatggc	aly-MIR172e-p5	ctttgtttttgcctctcgatc	5'	New	gp2b	.............((((((((.((..........((((((.....(((........))).........))))))................(((.....)))........)).)))))).))	108	34.7	-11.1	0.3	5.5	2	0	1.5	1.5	3	5.66361	1.72204	0	1.94556	1.49233	2.36482	low
96	78	csn-miR172e-p5_2ss1CT17CT	TTTTGTTTTTGCCTCTTGATC	21	Sc0006345	+	23849	23889	TTTTGTTTTTGCCTCTTGATCctcttctattttttgcattg	1	aly-MIR172e,	aly-MIR172e	gccagtagtcgcagatGCAGCACCATTAAGATTCACaagagatgtggttccctttgtttttgcctctcgatccgaagaaaagggttcctttcgagtggGAATCTTGATGATGCTGCATcagcaaatacatggc	aly-MIR172e-p5	ctttgtttttgcctctcgatc	5'	New	gp2b	.........(((.....((......))........)))...	29	31.7	-0.3	0	5.5	2	0	1.5	1.5	3	5.66361	1.72204	0	1.94556	1.49233	2.36482	low
97	79	csn-miR172e-p5_1ss16CT	TTTGTTTTTGCCTCTTGATCC	21	Sc0005010	+	48577	48717	TTTGTTTTTGCCTCTTGATCCtcttgtattttttgtattgtttcccttattttattcagttcttcaaccaatgtcatattctcacttttcagcctcttgttttctttttgaactcgttctaatttcccaagatcaatgaag	1	aly-MIR172e,	aly-MIR172e	gccagtagtcgcagatGCAGCACCATTAAGATTCACaagagatgtggttccctttgtttttgcctctcgatccgaagaaaagggttcctttcgagtggGAATCTTGATGATGCTGCATcagcaaatacatggc	aly-MIR172e-p5	tttgtttttgcctctcgatcc	5'	New	gp2b	............((((((((.....((((.....))))...................(((((...............................................)))))................)))))).))..	127	31.9	-7.316	0.2	2	3.5	1.5	0	1.5	2	2.05949	3.01356	1.60965	0	1.49233	1.57655	low
98	80	csn-miR319b-p3_2ss6AT21CA	ATCCATCGATGCAGGAGCTGA	21	Sc0004726	+	77170	77359	ggaggaggaggctcttgagtctaatgaagatagttgtgtgaccgatctctgctgctgactcgatggttcatcaacatatatcaaactatgatcggatagttcgacatggatatgtttttgATCCATCGATGCAGGAGCTGAgttcgattatgcctgtcttctcttggactgaagggtttccttctctctc	2	vvi-MIR319b,stu-MIR319,	vvi-MIR319b	tgtggaagaaggagctctctttagtccagtccgagacagcttcaaggctgatacgtggctgctgactcgttgcttcaagaactcatcacataggcctggaaaagatggatggttttttgatccaacgatgcaggagctgcgttcagttatggctgtcacgtcTTGGACTGAAGGGAGCTCCCTtgtattccaca	vvi-MIR319b-p3	atccaacgatgcaggagctgc	3'	New	gp2b	(((((((((..(((((.(((((((.((((((((..(..(((.(((.(((.(((.(((..(((((((.(((..(((((((......(((((.(((((...)))))))))))))))))..))).)))))))..))).))).))).))).)))..)))))))))..))))))).)))))..)))))))))...	187	44.7	-91.3	1.1	2	0	0	4.5	52	2	2.05949	0	0	5.83668	51.7342	1.57655	middle
99	80	csn-miR319b-p3_2ss6AT21CA	ATCCATCGATGCAGGAGCTGA	21	Sc0006137	-	29819	30014	tggaggaaggagctctcttcggtccagttcgaggcggtttgaaggctgataactcagctgctgactcgttggttcaagaactcatcaaatcataatagagaaaagagtgatatgtttttgATCCATCGATGCAGGAGCTGTgttcagttattgctgtcacgccttggactgaagggagctcccttttattccattg	15	vvi-MIR319b,ptc-MIR159d,mdm-MIR159a,mdm-MIR159c,mdm-MIR159b,cpa-MIR159b,smo-MIR159,pta-MIR159c,pta-MIR159a,osa-MIR159f,bdi-MIR159a,sbi-MIR159b,zma-MIR159d,zma-MIR159c,sof-MIR159c,	vvi-MIR319b	tgtggaagaaggagctctctttagtccagtccgagacagcttcaaggctgatacgtggctgctgactcgttgcttcaagaactcatcacataggcctggaaaagatggatggttttttgatccaacgatgcaggagctgcgttcagttatggctgtcacgtcTTGGACTGAAGGGAGCTCCCTtgtattccaca	vvi-MIR319b-p3	atccaacgatgcaggagctgc	3'	New	gp2b	(((((((((((((((((((((((((((..((.((((((..((..(((((..((.(((((.(((..(((.(((.((((((((..((((..((.............)).))))..)))))))).))).)))..))).))))).)))))))..)))))))).))..))))))))))))))))))).)))..)))))...	193	45.9	-89.1	1	2	0	0	4.5	52	2	2.05949	0	0	5.83668	51.7342	1.57655	middle
100	81	csn-miR390b-p3_2ss4AT21CA	ATATAGCTCAGGAGGGATAGA	21	Sc0001138	+	309536	309651	atgcttgtattgtatgaactcttgggaggttcacaccagggataatttttcgattagagaatttagagatgataagtctaatttgaatATATAGCTCAGGAGGGATAGAcaaggaa	31	gma-MIR390g,gma-MIR390a,gma-MIR390f,gma-MIR390e,gma-MIR390c,gma-MIR390d,gma-MIR390b,ath-MIR390b,ath-MIR390a,mdm-MIR390c,mdm-MIR390d,mdm-MIR390a,aly-MIR390b,aly-MIR390a,ppe-MIR390,nta-MIR390b,nta-MIR390a,nta-MIR390c,lus-MIR390d,lus-MIR390a,cme-MIR390a,cme-MIR390b,bra-MIR390,bna-MIR390b,bna-MIR390a,bna-MIR390c,tcc-MIR390b,sly-MIR390a,sly-MIR390b,lja-MIR390b,atr-MIR390,	ath-MIR390b	gagaaatagctataAAGCTCAGGAGGGATAGCGCCatggctcaccagtgctgtatgttttgtatatgcgtacatgtatatctgttggCGCTATCCATCCTGAGTTCCatagcttcttctt	ath-MIR390b-p3	ataAAGCTCAGGAGGGATAGC	3'	New	gp2b	...(((((.((((.....((((((((..(((((.........(((.(((((.....))))).))).((((.....))))....)))))......))))))))..)))))))))...	110	35.3	-23.9	0.6	6	17	8	0	0	0	6.17848	14.6373	8.5848	0	0	0	middle
101	82	csn-miR394b_L-1_1ss5CA	TGGAATTCTGTCCACCTCC	19	Sc0000437	+	469978	470131	gttggtttaacaaagtgtttcttacagagtttatTGGCATTCTGTCCACCTCCctcatcctctcagaaaaaaaaacccctctctctctctaaaatggaatggAGGTGGGCATACTGCCAACTgagctctgttggtttctctttgtaaaaccctc	50	vvi-MIR394b,vvi-MIR394a,vvi-MIR394c,gma-MIR394e,gma-MIR394d,gma-MIR394g,gma-MIR394f,gma-MIR394b,gma-MIR394a,gma-MIR394c,ptc-MIR394a,ptc-MIR394b,ath-MIR394b,ath-MIR394a,stu-MIR384,mdm-MIR394b,mdm-MIR394a,aly-MIR394b,aly-MIR394a,ppe-MIR394a,ppe-MIR394b,nta-MIR394,mes-MIR394c,mes-MIR394a,mes-MIR394b,lus-MIR394a,lus-MIR394b,cme-MIR394a,cme-MIR394b,bna-MIR394b,bna-MIR394a,tcc-MIR394b,tcc-MIR394a,cpa-M…	vvi-MIR394b	acagagtttaTTGGCATTCTGTCCACCTCCcatctcttgaaaatctctcttttctctctgtggaggtgggcatactgccaaccaagctctgtt	vvi-miR394b	TTGGCATTCTGTCCACCTCC	5'	Diff	gp2b	...(((((.((((((.....(..((((((((((((((((...(((((((((((....(((....(((....................))).....)))..)))))))))))...)))))).))))))))))..).....)))))).)))))...	148	42.9	-56.9	0.9	243	456	407.5	56.5	49.5	76.5	250.229	392.624	437.288	73.2827	49.247	60.303	middle
101	83	csn-miR394b-3p_1ss15TC	AGGTGGGCATACTGCCAACT	20	Sc0000437	+	469978	470131	gttggtttaacaaagtgtttcttacagagtttatTGGCATTCTGTCCACCTCCctcatcctctcagaaaaaaaaacccctctctctctctaaaatggaatggAGGTGGGCATACTGCCAACTgagctctgttggtttctctttgtaaaaccctc	50	vvi-MIR394b,vvi-MIR394a,vvi-MIR394c,gma-MIR394e,gma-MIR394d,gma-MIR394g,gma-MIR394f,gma-MIR394b,gma-MIR394a,gma-MIR394c,ptc-MIR394a,ptc-MIR394b,ath-MIR394b,ath-MIR394a,stu-MIR384,mdm-MIR394b,mdm-MIR394a,aly-MIR394b,aly-MIR394a,ppe-MIR394a,ppe-MIR394b,nta-MIR394,mes-MIR394c,mes-MIR394a,mes-MIR394b,lus-MIR394a,lus-MIR394b,cme-MIR394a,cme-MIR394b,bna-MIR394b,bna-MIR394a,tcc-MIR394b,tcc-MIR394a,cpa-M…	gma-MIR394b	taacagagtttaTTGGCATTCTGTCCACCTCCacttcctactctctctctgagccacatgttcgtgaagttggAGGTGGGCATACTGTCAACTgagttctgttg	gma-miR394b-3p	AGGTGGGCATACTGTCAACT	3'	Diff	gp2b	...(((((.((((((.....(..((((((((((((((((...(((((((((((....(((....(((....................))).....)))..)))))))))))...)))))).))))))))))..).....)))))).)))))...	148	42.9	-56.9	0.9	12.5	10	9.5	0	0	1.5	12.8718	8.61018	10.1945	0	0	1.18241	middle
102	84	csn-miR394b_1ss3GT	TTTGCATTCTGTCCACCTCC	20	Sc0004037	-	67687	67851	ctttcatgttggtttagcaaagggtttctcacagacttcaTTGGCATTCTGTCCACCTCCtctcctatcagaacaaaaaacaacccatcaaaatccctcaaagtggAGGTGGGCATACTGCCAACTgagctctgttggtatctctttgcaaaaccctcgtgatat	50	vvi-MIR394b,vvi-MIR394a,vvi-MIR394c,gma-MIR394d,gma-MIR394f,gma-MIR394b,gma-MIR394e,gma-MIR394g,gma-MIR394a,gma-MIR394c,ptc-MIR394a,ptc-MIR394b,ath-MIR394b,ath-MIR394a,stu-MIR384,mdm-MIR394a,mdm-MIR394b,aly-MIR394b,aly-MIR394a,ppe-MIR394b,ppe-MIR394a,nta-MIR394,mes-MIR394c,mes-MIR394a,mes-MIR394b,lus-MIR394a,lus-MIR394b,cme-MIR394a,cme-MIR394b,bna-MIR394b,bna-MIR394a,tcc-MIR394b,tcc-MIR394a,cpa-M…	vvi-MIR394b	acagagtttaTTGGCATTCTGTCCACCTCCcatctcttgaaaatctctcttttctctctgtggaggtgggcatactgccaaccaagctctgtt	vvi-miR394b	TTGGCATTCTGTCCACCTCC	5'	Diff	gp2b	...(((((..(((((.((((((((...(..(((((..(((((((((...(((((((((((.((......................................)).)))))))))))...)))))).)))..)))))..)...)))))))).)))))..)))))...	159	44.2	-62.145	0.9	115.5	269	97.5	19	7	0	118.936	231.614	104.627	24.6437	6.96422	0	middle
102	83	csn-miR394b-3p_1ss15TC	AGGTGGGCATACTGCCAACT	20	Sc0004037	-	67687	67851	ctttcatgttggtttagcaaagggtttctcacagacttcaTTGGCATTCTGTCCACCTCCtctcctatcagaacaaaaaacaacccatcaaaatccctcaaagtggAGGTGGGCATACTGCCAACTgagctctgttggtatctctttgcaaaaccctcgtgatat	50	vvi-MIR394b,vvi-MIR394a,vvi-MIR394c,gma-MIR394d,gma-MIR394f,gma-MIR394b,gma-MIR394e,gma-MIR394g,gma-MIR394a,gma-MIR394c,ptc-MIR394a,ptc-MIR394b,ath-MIR394b,ath-MIR394a,stu-MIR384,mdm-MIR394a,mdm-MIR394b,aly-MIR394b,aly-MIR394a,ppe-MIR394b,ppe-MIR394a,nta-MIR394,mes-MIR394c,mes-MIR394a,mes-MIR394b,lus-MIR394a,lus-MIR394b,cme-MIR394a,cme-MIR394b,bna-MIR394b,bna-MIR394a,tcc-MIR394b,tcc-MIR394a,cpa-M…	gma-MIR394b	taacagagtttaTTGGCATTCTGTCCACCTCCacttcctactctctctctgagccacatgttcgtgaagttggAGGTGGGCATACTGTCAACTgagttctgttg	gma-miR394b-3p	AGGTGGGCATACTGTCAACT	3'	Diff	gp2b	...(((((..(((((.((((((((...(..(((((..(((((((((...(((((((((((.((......................................)).)))))))))))...)))))).)))..)))))..)...)))))))).)))))..)))))...	159	44.2	-62.145	0.9	12.5	10	9.5	0	0	1.5	12.8718	8.61018	10.1945	0	0	1.18241	middle
103	84	csn-miR394b_1ss3GT	TTTGCATTCTGTCCACCTCC	20	Sc0000177	-	798939	799081	catTTTCCATTCTGTCCACCTCCtccagccaccgttgtcggcggcctcctccaaccaccacctcttgcaatggccaaccacctctcactggcttcggccaccacctccatcacctgacaaccacctttggccacaagaaacca	50	vvi-MIR394b,vvi-MIR394a,vvi-MIR394c,gma-MIR394d,gma-MIR394f,gma-MIR394b,gma-MIR394e,gma-MIR394g,gma-MIR394a,gma-MIR394c,ptc-MIR394a,ptc-MIR394b,ath-MIR394b,ath-MIR394a,stu-MIR384,mdm-MIR394a,mdm-MIR394b,aly-MIR394b,aly-MIR394a,ppe-MIR394b,ppe-MIR394a,nta-MIR394,mes-MIR394c,mes-MIR394a,mes-MIR394b,lus-MIR394a,lus-MIR394b,cme-MIR394a,cme-MIR394b,bna-MIR394b,bna-MIR394a,tcc-MIR394b,tcc-MIR394a,cpa-M…	vvi-MIR394b	acagagtttaTTGGCATTCTGTCCACCTCCcatctcttgaaaatctctcttttctctctgtggaggtgggcatactgccaaccaagctctgtt	vvi-miR394b	TTGGCATTCTGTCCACCTCC	5'	Diff	gp2b	...........................(((.(((....))).))).................(((((...(((((((...........((((....)))).........((....)).........)))))))))))).....	1	58	-31.6	0.4	115.5	269	97.5	19	7	0	118.936	231.614	104.627	24.6437	6.96422	0	middle
104	85	csn-miR394b_1ss6AG	TTGGCGTTCTGTCCACCTCC	20	Sc0000444	-	769088	769111	aatgTTGGCGTTCTGTCCAACTCC	50	vvi-MIR394b,vvi-MIR394a,vvi-MIR394c,gma-MIR394e,gma-MIR394d,gma-MIR394g,gma-MIR394f,gma-MIR394b,gma-MIR394a,gma-MIR394c,ptc-MIR394a,ptc-MIR394b,ath-MIR394b,ath-MIR394a,stu-MIR384,mdm-MIR394b,mdm-MIR394a,aly-MIR394b,aly-MIR394a,ppe-MIR394a,ppe-MIR394b,nta-MIR394,mes-MIR394c,mes-MIR394a,mes-MIR394b,lus-MIR394a,lus-MIR394b,cme-MIR394a,cme-MIR394b,bna-MIR394b,bna-MIR394a,tcc-MIR394b,tcc-MIR394a,cpa-M…	vvi-MIR394b	acagagtttaTTGGCATTCTGTCCACCTCCcatctcttgaaaatctctcttttctctctgtggaggtgggcatactgccaaccaagctctgtt	vvi-miR394b	TTGGCATTCTGTCCACCTCC	3'	Diff	gp2b	...((((((.....).)))))...	18	50	-4.8	0.4	1.5	4	3.5	0	0	0	1.54462	3.44407	3.75585	0	0	0	low
105	85	csn-miR394b_1ss6AG	TTGGCGTTCTGTCCACCTCC	20	Sc0001050	-	51769	51792	aatgTTGGCGTTCTGTCCAACTCC	50	vvi-MIR394b,vvi-MIR394a,vvi-MIR394c,gma-MIR394e,gma-MIR394d,gma-MIR394g,gma-MIR394f,gma-MIR394b,gma-MIR394a,gma-MIR394c,ptc-MIR394a,ptc-MIR394b,ath-MIR394b,ath-MIR394a,stu-MIR384,mdm-MIR394b,mdm-MIR394a,aly-MIR394b,aly-MIR394a,ppe-MIR394a,ppe-MIR394b,nta-MIR394,mes-MIR394c,mes-MIR394a,mes-MIR394b,lus-MIR394a,lus-MIR394b,cme-MIR394a,cme-MIR394b,bna-MIR394b,bna-MIR394a,tcc-MIR394b,tcc-MIR394a,cpa-M…	vvi-MIR394b	acagagtttaTTGGCATTCTGTCCACCTCCcatctcttgaaaatctctcttttctctctgtggaggtgggcatactgccaaccaagctctgtt	vvi-miR394b	TTGGCATTCTGTCCACCTCC	3'	Diff	gp2b	...((((((.....).)))))...	18	50	-4.8	0.4	1.5	4	3.5	0	0	0	1.54462	3.44407	3.75585	0	0	0	low
106	86	csn-miR394b_1ss14CA	TTGGCATTCTGTCAACCTCC	20	Sc0005136	-	73279	73366	TTGGCATTCTGTCAACCTCCttccacagtagagtcatcttctgcagctcccatatgcacacgcatgtggcagcattctttgtcagcaa	50	vvi-MIR394b,vvi-MIR394a,vvi-MIR394c,gma-MIR394d,gma-MIR394f,gma-MIR394b,gma-MIR394e,gma-MIR394g,gma-MIR394a,gma-MIR394c,ptc-MIR394a,ptc-MIR394b,ath-MIR394b,ath-MIR394a,stu-MIR384,mdm-MIR394a,mdm-MIR394b,aly-MIR394b,aly-MIR394a,ppe-MIR394b,ppe-MIR394a,nta-MIR394,mes-MIR394c,mes-MIR394a,mes-MIR394b,lus-MIR394a,lus-MIR394b,cme-MIR394a,cme-MIR394b,bna-MIR394b,bna-MIR394a,tcc-MIR394b,tcc-MIR394a,cpa-M…	vvi-MIR394b	acagagtttaTTGGCATTCTGTCCACCTCCcatctcttgaaaatctctcttttctctctgtggaggtgggcatactgccaaccaagctctgtt	vvi-miR394b	TTGGCATTCTGTCCACCTCC	5'	Diff	gp2b	((((((.....................((((((.....)))))).(((.((((((((....)))))))).)))......))))))...	85	48.9	-25.9	0.6	1.5	9	6	0	0	0	1.54462	7.74917	6.4386	0	0	0	low
107	87	csn-miR394b_1ss18TG	TTGGCATTCTGTCCACCGCC	20	xfSc0000057	-	53758	53797	ttcgacttggtgcatatcatTTGGCATTTTGTCCACCGCC	50	vvi-MIR394b,vvi-MIR394a,vvi-MIR394c,gma-MIR394e,gma-MIR394d,gma-MIR394g,gma-MIR394f,gma-MIR394b,gma-MIR394a,gma-MIR394c,ptc-MIR394a,ptc-MIR394b,ath-MIR394b,ath-MIR394a,stu-MIR384,mdm-MIR394b,mdm-MIR394a,aly-MIR394b,aly-MIR394a,ppe-MIR394a,ppe-MIR394b,nta-MIR394,mes-MIR394c,mes-MIR394a,mes-MIR394b,lus-MIR394a,lus-MIR394b,cme-MIR394a,cme-MIR394b,bna-MIR394b,bna-MIR394a,tcc-MIR394b,tcc-MIR394a,cpa-M…	vvi-MIR394b	acagagtttaTTGGCATTCTGTCCACCTCCcatctcttgaaaatctctcttttctctctgtggaggtgggcatactgccaaccaagctctgtt	vvi-miR394b	TTGGCATTCTGTCCACCTCC	3'	Diff	gp2b	...(((...((((..........))))...))).......	30	47.5	-5.5	0.3	0	6.5	7.5	0	0	2	0	5.59662	8.04825	0	0	1.57655	low
108	88	csn-miR394a_R-1_1ss21AT	TTGGCATTCTGTCCACCTCCT	21	xpSc0055129	-	9366	9466	aacgacaacatgagtaaacctttgttacccaagcaagtcattcgaacgtgctttccgtaaaactccaagcaccatatgtTTGGCATTCTGTCAACCTCCTt	50	vvi-MIR394a,vvi-MIR394b,vvi-MIR394c,gma-MIR394g,gma-MIR394d,gma-MIR394f,gma-MIR394b,gma-MIR394e,gma-MIR394a,gma-MIR394c,ptc-MIR394b,ptc-MIR394a,ath-MIR394b,ath-MIR394a,stu-MIR384,mdm-MIR394b,mdm-MIR394a,aly-MIR394b,aly-MIR394a,ppe-MIR394a,ppe-MIR394b,nta-MIR394,mes-MIR394c,mes-MIR394a,mes-MIR394b,lus-MIR394b,lus-MIR394a,cme-MIR394a,cme-MIR394b,bna-MIR394a,bna-MIR394b,tcc-MIR394a,tcc-MIR394b,cpa-M…	vvi-MIR394c	cagagccattTTGGCATTCTGTCCACCTCCATatataccaattcttctgaattggcgcccacaagcgtttggaggcggccaggatgccaaattggctctgta	vvi-miR394a	TTGGCATTCTGTCCACCTCCAT	3'	Diff	gp2b	...((((..(((............((((..(((((..((....))...)))))...))))....(((((((.....))))))))))..)))).........	89	42.6	-18.6	0.4	22	32.5	31	2	2	4	22.6544	27.9831	33.2661	2.59408	1.98978	3.1531	middle
109	89	csn-miR396b-p5_2ss18AT19CT	TTCCACAGCTTTCTTGATT	19	Sc0000060	-	760436	760560	TTCCACAACTTTCTTGATTacttcggcttagaacaccttggacaagtattacctcggatccacccatagttggttacctcggaccaaactacctcagagttcaccttttattgtgatcttgatga	103	vvi-MIR396b,vvi-MIR396d,vvi-MIR396a,vvi-MIR396c,mtr-MIR396b,mtr-MIR396a,gma-MIR396c,gma-MIR396g,gma-MIR396b,gma-MIR396f,gma-MIR396i,gma-MIR396d,gma-MIR396e,gma-MIR396a,gma-MIR396h,gma-MIR396k,ptc-MIR396d,ptc-MIR396c,ptc-MIR396b,ptc-MIR396e,ptc-MIR396a,ath-MIR396b,ath-MIR396a,stu-MIR396,mdm-MIR396c,mdm-MIR396b,mdm-MIR396d,mdm-MIR396e,mdm-MIR396a,aly-MIR396a,aly-MIR396b,ppe-MIR396a,ppe-MIR396b,nta-…	vvi-MIR396b	tcctgccatgcttTTCCACAGCTTTCTTGAACTtcttctccctgtttggtggtctcctacgtttacccatccactgaagttcaagaaagctgtgggaaaccatggctt	vvi-MIR396b-p5	TTCCACAGCTTTCTTGAAC	5'	New	gp2b	...........((..((((((.((......))......(((((............((......)).(((((((((......)))))).))).......))))).........))))))..))...	111	42.4	-19.5	0.4	1.5	1.5	0	0	2	0	1.54462	1.29153	0	0	1.98978	0	low
110	90	csn-miR396e-5p	TCCACAGGCTTTCTTGAACTG	21	Sc0000537	-	156459	156505	TCCACAGGCTTTCTTGAACGGtggcggcccctgtttatgtgcctttc	12	osa-MIR396e,osa-MIR396f,bdi-MIR396b,bdi-MIR396a,sbi-MIR396e,sbi-MIR396d,zma-MIR396c,zma-MIR396d,ata-MIR396d,ata-MIR396a,ata-MIR396b,far-MIR396,	osa-MIR396f	gccatgctcTCCACAGGCTTTCTTGAACTGtgaactcgtgtgtgcatgctcctcatatattgttctagatcccatgcatgatgcatatcgatcgatctgatctgaattaggtcatcgatgcgcatctggatccccatcttgttgATAGTTCAAGAAAGTCCTTGGAAAacatggtg	osa-miR396e-5p	TCCACAGGCTTTCTTGAACTG	5'	Yes	gp2b	.....((((.....(((((((.((....)))))))))...))))...	39	55.3	-13.1	0.5	11.5	8	0	0	6	5	11.8421	6.88815	0	0	5.96933	3.94137	middle
111	90	csn-miR396e-5p	TCCACAGGCTTTCTTGAACTG	21	xpSc0053556	-	185952	185979	TCCACAGGCTTTCTTGAACGGgagttgc	12	osa-MIR396e,osa-MIR396f,bdi-MIR396b,bdi-MIR396a,sbi-MIR396e,sbi-MIR396d,zma-MIR396d,zma-MIR396c,ata-MIR396d,ata-MIR396a,ata-MIR396b,far-MIR396,	osa-MIR396f	gccatgctcTCCACAGGCTTTCTTGAACTGtgaactcgtgtgtgcatgctcctcatatattgttctagatcccatgcatgatgcatatcgatcgatctgatctgaattaggtcatcgatgcgcatctggatccccatcttgttgATAGTTCAAGAAAGTCCTTGGAAAacatggtg	osa-miR396e-5p	TCCACAGGCTTTCTTGAACTG	5'	Yes	gp2b	.......(((..(......)..)))...	18	53.6	-4.7	0.3	11.5	8	0	0	6	5	11.8421	6.88815	0	0	5.96933	3.94137	middle
112	91	csn-miR396e-p5_2ss2TG17GC	CGCTTGATCTCCCGTCCATCT	21	Sc0000741	-	589494	589622	tgcgaaggtTGCTTGATCTCCCGTCCATCTtgtgtcccgaagaactagaacagcaagattcccttgttctatccgatgtaggacttgaagtcggatttgaacaactccgaggtggttagcatattcatc	1	bdi-MIR396e,	bdi-MIR396e	ctcgagcaagtagttagtccatgccattcctTTCCACAGCTTTCTTGAACTTcccttcccggactgcggcctgtagctctctcgccctcttgatctcccgtcgatctccactggtagcagctgggagagcagggaagaggagGGTCAAGAAAGCTGTGGGAAGaaatggcataaccaggactttgattgaattcagttcat	bdi-MIR396e-p5	ctcttgatctcccgtcgatct	5'	New	gp2b	...(((...(((.(((((.((((...(((((((...................)))))))....((((((.(((((((............)))))))..))))))...)).)).))))))))..)))...	123	46.5	-32.6	0.5	0	0	1.5	2	1.5	0	0	0	1.60965	2.59408	1.49233	0	low
113	92	csn-miR396b-p3_2ss18AT19CT	TTCCACAGCTTTCTTGATT	19	Sc0001717	-	128042	128134	accttggtgtgttgcgtatcacacaagttcaacctcgttcatctcttTTGCACAGCTTTCTTGATTaggattattacatgcacataccagtat	103	vvi-MIR396b,vvi-MIR396d,vvi-MIR396a,vvi-MIR396c,mtr-MIR396b,mtr-MIR396a,gma-MIR396c,gma-MIR396g,gma-MIR396b,gma-MIR396f,gma-MIR396i,gma-MIR396d,gma-MIR396e,gma-MIR396a,gma-MIR396h,gma-MIR396k,ptc-MIR396d,ptc-MIR396c,ptc-MIR396b,ptc-MIR396e,ptc-MIR396a,ath-MIR396b,ath-MIR396a,stu-MIR396,mdm-MIR396c,mdm-MIR396b,mdm-MIR396d,mdm-MIR396e,mdm-MIR396a,aly-MIR396a,aly-MIR396b,ppe-MIR396a,ppe-MIR396b,nta-…	vvi-MIR396b	tcctgccatgcttTTCCACAGCTTTCTTGAACTtcttctccctgtttggtggtctcctacgtttacccatccactgaagttcaagaaagctgtgggaaaccatggctt	vvi-MIR396b-p3	TTCCACAGCTTTCTTGAAC	3'	New	gp2b	...(((((((((.(((((((...((((......((.((.((.......)).))))....)))).....)))......)))))))))))))...	87	39.8	-16.7	0.5	1.5	1.5	0	0	2	0	1.54462	1.29153	0	0	1.98978	0	low
114	93	csn-miR396b_R+1_1ss7AT	TTCCACTGCTTTCTTGAACTT	21	xfSc0000011	+	156194	156238	tcccaagaatttccaaagtgccaaTTCCACTGTTTTCTTGAACTT	57	vvi-MIR396b,mtr-MIR396a,gma-MIR396d,gma-MIR396c,gma-MIR396g,gma-MIR396b,gma-MIR396f,gma-MIR396k,ptc-MIR396d,ptc-MIR396c,ptc-MIR396e,ptc-MIR396g,ath-MIR396b,stu-MIR396,mdm-MIR396d,mdm-MIR396e,mdm-MIR396c,aly-MIR396b,ppe-MIR396b,nta-MIR396c,nta-MIR396b,mes-MIR396d,mes-MIR396f,mes-MIR396e,mes-MIR396c,lus-MIR396e,lus-MIR396b,cme-MIR396c,cme-MIR396a,cme-MIR396d,bra-MIR396,bna-MIR396a,tcc-MIR396c,tcc-M…	vvi-MIR396b	tcctgccatgcttTTCCACAGCTTTCTTGAACTtcttctccctgtttggtggtctcctacgtttacccatccactgaagttcaagaaagctgtgggaaaccatggctt	vvi-miR396b	TTCCACAGCTTTCTTGAACT	3'	Diff	gp2b	...((((((.......((((.......))))...)))))).....	37	37.8	-7	0.4	0	0	2.5	3	0	1.5	0	0	2.68275	3.89112	0	1.18241	low
115	93	csn-miR396b_R+1_1ss7AT	TTCCACTGCTTTCTTGAACTT	21	xfSc0000028	-	45912	45933	TTCCACTGTTTTCTTGAACTTc	57	vvi-MIR396b,mtr-MIR396a,gma-MIR396d,gma-MIR396c,gma-MIR396g,gma-MIR396b,gma-MIR396f,gma-MIR396k,ptc-MIR396d,ptc-MIR396c,ptc-MIR396e,ptc-MIR396g,ath-MIR396b,stu-MIR396,mdm-MIR396d,mdm-MIR396e,mdm-MIR396c,aly-MIR396b,ppe-MIR396b,nta-MIR396c,nta-MIR396b,mes-MIR396d,mes-MIR396f,mes-MIR396e,mes-MIR396c,lus-MIR396e,lus-MIR396b,cme-MIR396c,cme-MIR396a,cme-MIR396d,bra-MIR396,bna-MIR396a,tcc-MIR396c,tcc-M…	vvi-MIR396b	tcctgccatgcttTTCCACAGCTTTCTTGAACTtcttctccctgtttggtggtctcctacgtttacccatccactgaagttcaagaaagctgtgggaaaccatggctt	vvi-miR396b	TTCCACAGCTTTCTTGAACT	5'	Diff	gp2b	.......((((....))))...	12	36.4	-0.8	0.1	0	0	2.5	3	0	1.5	0	0	2.68275	3.89112	0	1.18241	low
116	94	csn-miR396e-p3_2ss2TG17GC	CGCTTGATCTCCCGTCCATCT	21	xfSc0001085	-	68936	68990	tcagggtgcatagatgcgaaggtTGCTTGATCTCCCGTCCATCTtgtgtcccgta	1	bdi-MIR396e,	bdi-MIR396e	ctcgagcaagtagttagtccatgccattcctTTCCACAGCTTTCTTGAACTTcccttcccggactgcggcctgtagctctctcgccctcttgatctcccgtcgatctccactggtagcagctgggagagcagggaagaggagGGTCAAGAAAGCTGTGGGAAGaaatggcataaccaggactttgattgaattcagttcat	bdi-MIR396e-p3	ctcttgatctcccgtcgatct	3'	New	gp2b	...(((.(((((((((.(((((((....)))))....)))))).))))))))...	49	52.7	-15.6	0.5	0	0	1.5	2	1.5	0	0	0	1.60965	2.59408	1.49233	0	low
117	95	csn-miR397a	TCATTGAGTGCAGCGTTGATG	21	Sc0001735	-	182770	182877	TCATTGAGTGCAGCATTGATGattctcaacaagtatgtcttgcctggttctactggtaaattgaaccctcctaagcatcataaaaaaaaaatgaaattttaatgtaga	23	vvi-MIR397a,mtr-MIR397,gma-MIR397a,gma-MIR397b,ptc-MIR397a,ath-MIR397a,mdm-MIR397a,mdm-MIR397b,aly-MIR397a,aly-MIR397b,ppe-MIR397,nta-MIR397,lus-MIR397b,cme-MIR397,bna-MIR397a,bna-MIR397b,tcc-MIR397,rco-MIR397,csi-MIR397,ssl-MIR397,osa-MIR397a,bdi-MIR397a,sbi-MIR397,	vvi-MIR397a	gaagaaaacaTCATTGAGTGCAGCGTTGATGaaactgaagtattccatttttcagcttctttgaagtccggcaagatgggttctggttgattccattggcgctgcactcaatcatgtc	vvi-miR397a	TCATTGAGTGCAGCGTTGATG	5'	Yes	gp2b	.(((((((.....((((((((........((((.....))))...(((((............)))))........)))))..........)))....)))))))....	103	33.3	-14.6	0.4	0	0	0	0	5.5	5	0	0	0	0	5.47189	3.94137	low
118	95	csn-miR397a	TCATTGAGTGCAGCGTTGATG	21	Sc0005089	-	61193	61264	tcggcttcaacaatggtgagagtgtggtttgcaatgctaaagaaaagctcgTCATTGAGTGCAGCGTTGATC	23	vvi-MIR397a,mtr-MIR397,gma-MIR397a,gma-MIR397b,ptc-MIR397a,ath-MIR397a,mdm-MIR397a,mdm-MIR397b,aly-MIR397a,aly-MIR397b,ppe-MIR397,nta-MIR397,lus-MIR397b,cme-MIR397,bna-MIR397a,bna-MIR397b,tcc-MIR397,rco-MIR397,csi-MIR397,ssl-MIR397,osa-MIR397a,bdi-MIR397a,sbi-MIR397,	vvi-MIR397a	gaagaaaacaTCATTGAGTGCAGCGTTGATGaaactgaagtattccatttttcagcttctttgaagtccggcaagatgggttctggttgattccattggcgctgcactcaatcatgtc	vvi-miR397a	TCATTGAGTGCAGCGTTGATG	3'	Yes	gp2b	...(((.((.(((((..(((....((((.......))))........)))..)))))..)).))).......	62	45.8	-16.2	0.5	0	0	0	0	5.5	5	0	0	0	0	5.47189	3.94137	low
119	96	csn-miR397-p3	TTGAGTGCAGCGTTGATGATA	21	Sc0003543	-	188624	188738	taacaacgacgtcactgactattggaaagtatagctagcatcaacggcaacaacagtcatgttgtggtttgctatcttgaaaaagaactagttaTTGAGTGCAGCGTTGATAATA	1	dpr-MIR397,	dpr-MIR397	ttaaaaacgCCATTGAGTGCAGCGTTGATGatattgcatttgttcgatctctttagtcctgatttatcgattgttatatcgtcaatgctgcacttaataacgtttttaa	dpr-MIR397-p3	TTGAGTGCAGCGTTGATGata	3'	New	gp2b	...(((((..(.((((...((((....))))(((((((.......((((((((((....))))))....)))).((((....)))).)))))))...)))))..)))))......	106	38.3	-27.6	0.6	0	0	0	0	4.5	9	0	0	0	0	4.477	7.09447	low
120	97	csn-miR397-p5	TTGAGTGCAGCGTTGATGATA	21	Sc0004454	+	101816	101883	actggttaTTGAGTGCAGCGTTGATGATAcgcaagagatatgttttcccttttactaccttgatcttg	1	dpr-MIR397,	dpr-MIR397	ttaaaaacgCCATTGAGTGCAGCGTTGATGatattgcatttgttcgatctctttagtcctgatttatcgattgttatatcgtcaatgctgcacttaataacgtttttaa	dpr-MIR397-p5	TTGAGTGCAGCGTTGATGata	5'	New	gp2b	...(((((...((((..((((.......))))..((((.....)))).....))))....)))))...	62	39.7	-10.4	0.4	0	0	0	0	4.5	9	0	0	0	0	4.477	7.09447	low
121	98	csn-miR398a	TGTGTTCTCAGGTCACCCCTT	21	Sc0000448	+	271374	271531	catgactgaagcataccccagaggtgtgaacatgagaacacacactgtgattttgagtttggttgcttttaaatctcagtctctttctctttttctttctctttctcaatatcacaatgTGTGTTCTCAGGTCACCCCTTtggggcacttctgttttc	57	vvi-MIR398a,vvi-MIR398b,vvi-MIR398c,mtr-MIR398a,mtr-MIR398c,mtr-MIR398b,gma-MIR398b,gma-MIR398a,gma-MIR398d,gma-MIR398c,ptc-MIR398a,ptc-MIR398c,ptc-MIR398b,ath-MIR398a,ath-MIR398b,ath-MIR398c,gra-MIR398,stu-MIR398b,mdm-MIR398a,mdm-MIR398c,mdm-MIR398b,aly-MIR398a,aly-MIR398b,ppe-MIR398a,nta-MIR398,lus-MIR398b,lus-MIR398e,lus-MIR398d,lus-MIR398c,lus-MIR398a,cme-MIR398b,cme-MIR398a,bra-MIR398,tcc-MI…	vvi-MIR398a	acaccccaagggagtggcacctgagaacaccggttgtgttggctgcgccaagctctgctagctaatgcatttTGTGTTCTCAGGTCACCCCTTtggggcacca	vvi-miR398a	TGTGTTCTCAGGTCACCCCTT	3'	Yes	gp2b	...(((.((((....(((((((((.((((...((((((((((((.((((((.(((((...((((.......))))..((.......))................))))).)))))).))))))))))))..)))).)))))))))..)))).)))...	152	41.1	-60.9	0.9	27	11	4	697	1620	7432	27.8032	9.4712	4.2924	904.036	1611.72	5858.45	high
122	99	csn-miR398_2ss9CT21GC	GGAGCGACTTGAGATCACATC	21	Sc0000879	+	682246	682326	caacaGGAGCGATTTGAGATCACATCaaggtgcatctgatcttattgcgcttgatgatgtgttctcaggtcgtccctgcaa	1	hbr-MIR398,	hbr-MIR398	gtggagaattcctacaGGAGCGACCTGAGATCACATGtggccaccctcacatattcccttatcttctattggttgtgttttcgtgtgttctcaggtcacccctgccgggctttcctcccctgctagattggtatgatgat	hbr-miR398	GGAGCGACCTGAGATCACATG	5'	Diff	gp2b	...((((..(((..(((((.((((((((((((((...........)))))))..))))))).)))))..)))..))))...	75	46.9	-39.3	1	3	4	6	34	15	55	3.08924	3.44407	6.4386	44.0993	14.9233	43.3551	middle
123	100	csn-miR398-p3_2ss5GA18AG	GGGGACGGACTGGGAACG	18	xpSc0054695	+	57919	58019	gggtcccagtcccgaacccgtcggctgtcggcggactgctcgagctgctcccgcggcgagagcgggtcgccgcgtgccggccgGGGGACGGACTGGGAACG	2	sbi-MIR398,zma-MIR398b,	sbi-MIR398	gggggcggactgggaacacatgggaatgagagatgagattgctcggtcgtgctggccctgggctcgtagttgatctgcttgtatgcaTGTGTTCTCAGGTCGCCCCCGc	sbi-MIR398-p3	gggggcggactgggaaca	3'	New	gp2b	...(((((((((....(((((((((((.(((((..((((((..(((((....)))))..))))))..))))))).))))).))))....)))))))))...	95	77.2	-69	0.9	11	21	0	15	3	14	11.3272	18.0814	0	19.4556	2.98467	11.0358	middle
124	101	csn-miR399d-p5_2ss18TC19TA	TTGCCCTACGACTGCTTCAGC	21	Sc0000130	+	577479	577566	ctttgtagtgagTTGCCCTACGATTGCTTCAGCttaacatctacacaatgtaatatgttatatacaccaagggccgttgcatgcaatt	10	mdm-MIR399i,mdm-MIR399d,ppe-MIR399d,ppe-MIR399e,ppe-MIR399g,ppe-MIR399c,ppe-MIR399j,ppe-MIR399h,ppe-MIR399l,ppe-MIR399a,	mdm-MIR399d	tgagcgaattagttgtagggcttctctccgatggcaggaaatattaatggtcatgaatcatggaagcatggatttttgtgttctctcatgagttatgaccTGCCAAAGGAGAGTTGCCCTAcgactgcttttgctta	mdm-MIR399d-p5	TTGCCCTAcgactgcttttgc	5'	New	gp2b	..((((((..(...(((((......((....)).((((((.(((.....)))..)))))).........)))))..)..).)))))..	84	39.8	-18.4	0.5	0	2	3.5	6	4	14.5	0	1.72204	3.75585	7.78224	3.97955	11.43	middle
125	102	csn-miR399e	TGCCAAAGGAGATTTGCCCGG	21	Sc0000153	+	566818	566976	aaatgatcagtcaagtgcatagttgcattaccggggaactacgcttttggcaggcggccacttgactatgcgtgattaatttcgtaaggcagaaatgtaatgtcttTGCCAAAGGAGATTTGCCCGTcaattcacctgtgcaatcttctagatacaaat	21	vvi-MIR399e,ptc-MIR399b,ath-MIR399f,aly-MIR399a,aly-MIR399h,mes-MIR399c,mes-MIR399b,mes-MIR399d,mes-MIR399g,lus-MIR399e,lus-MIR399c,lus-MIR399a,cme-MIR399c,bna-MIR399a,bna-MIR399b,tcc-MIR399b,tcc-MIR399d,rco-MIR399b,rco-MIR399c,csi-MIR399a,bdi-MIR399d,	vvi-MIR399e	gcatattacagggcaaattatcttttggcaggcagccacttagagacacagccaagccatgcattcttgtagtgtgccctcTGCCAAAGGAGATTTGCCCGGcaattcttct	vvi-miR399e	TGCCAAAGGAGATTTGCCCGG	3'	Yes	gp2b	...(((((((.....(((((((.((.(((..((((.((.....(((((((((((((............((((..........))))..(((....)))..))))..)))))))))....)).))))..))).)).))))))).....)).))).))...	153	42.8	-42.1	0.6	0	2.5	0	0	0	0	0	2.15255	0	0	0	0	low
126	103	csn-miR399e_1ss21GA	TGCCAAAGGAGATTTGCCCGA	21	Sc0000236	+	144059	144199	aaatgcatgtatggatgcattatagggcaataactcctttggcagacggctacttgactacatgtgattaagttcacatattaagtagaacagtatgctcttTGCCAAAGGAGATTTGCCCGAcaattcacccatgcaatc	66	vvi-MIR399e,vvi-MIR399g,vvi-MIR399d,mtr-MIR399c,mtr-MIR399i,mtr-MIR399f,mtr-MIR399e,mtr-MIR399h,mtr-MIR399g,mtr-MIR399s,mtr-MIR399t,mtr-MIR399a,gma-MIR399d,gma-MIR399g,gma-MIR399e,gma-MIR399f,ptc-MIR399b,ptc-MIR399a,ptc-MIR399j,ath-MIR399f,ath-MIR399a,ath-MIR399d,mdm-MIR399g,mdm-MIR399h,mdm-MIR399e,mdm-MIR399f,aly-MIR399h,aly-MIR399a,aly-MIR399i,aly-MIR399f,aly-MIR399d,aly-MIR399g,ppe-MIR399m,ppe…	vvi-MIR399e	gcatattacagggcaaattatcttttggcaggcagccacttagagacacagccaagccatgcattcttgtagtgtgccctcTGCCAAAGGAGATTTGCCCGGcaattcttct	vvi-miR399e	TGCCAAAGGAGATTTGCCCGG	3'	Diff	gp2b	...((((((..(((((........((((((...(((((((((((((..((((((...((((((((((......)))))).....))))...)))).))..)))))))))))))..))))))....)))))..))))))...	135	40.4	-59.8	1	23.5	128	5	0	0	0	24.1991	110.21	5.3655	0	0	0	middle
127	103	csn-miR399e_1ss21GA	TGCCAAAGGAGATTTGCCCGA	21	Sc0000759	+	530949	531081	aagtgcatggttgcattaccgggcaactattcttttggcagatggccacttgactgtgcgtgattaatttcataaaacagaaaagtaatctctcTGCCAAAGGAGATTTGCCCGAcaattcacctgtgcaatc	66	vvi-MIR399e,vvi-MIR399g,vvi-MIR399d,mtr-MIR399c,mtr-MIR399i,mtr-MIR399f,mtr-MIR399e,mtr-MIR399h,mtr-MIR399g,mtr-MIR399s,mtr-MIR399t,mtr-MIR399a,gma-MIR399d,gma-MIR399g,gma-MIR399e,gma-MIR399f,ptc-MIR399b,ptc-MIR399a,ptc-MIR399j,ath-MIR399f,ath-MIR399a,ath-MIR399d,mdm-MIR399g,mdm-MIR399h,mdm-MIR399e,mdm-MIR399f,aly-MIR399h,aly-MIR399a,aly-MIR399i,aly-MIR399f,aly-MIR399d,aly-MIR399g,ppe-MIR399m,ppe…	vvi-MIR399e	gcatattacagggcaaattatcttttggcaggcagccacttagagacacagccaagccatgcattcttgtagtgtgccctcTGCCAAAGGAGATTTGCCCGGcaattcttct	vvi-miR399e	TGCCAAAGGAGATTTGCCCGG	3'	Diff	gp2b	...((((..(.((.(((..(((((((...(((((((((((((..(..((((..((((..((((......))))...))))..))))...)..)))))))))))))..)))))))..))).)).)..))))...	127	42.9	-52.2	0.9	23.5	128	5	0	0	0	24.1991	110.21	5.3655	0	0	0	middle
128	104	csn-miR399i_1ss7AG	TGCCAAGGGAGAGTTGCCCTA	21	Sc0000468	+	249682	249816	tagtaagcgaaccagttatagggcaacgatctggaggcagctaacagagagttatggtgcaaatcataacttatctgtattaatcttcggtaagcTGCCAAAGGAGAGTTGCCCTAcgattgcttcagcttaaca	21	ptc-MIR399i,ptc-MIR399h,stu-MIR399i,mdm-MIR399d,mdm-MIR399i,ppe-MIR399e,ppe-MIR399g,ppe-MIR399c,ppe-MIR399j,ppe-MIR399d,ppe-MIR399h,ppe-MIR399l,ppe-MIR399a,cme-MIR399d,cme-MIR399e,cme-MIR399b,cme-MIR399g,sly-MIR399,csi-MIR399b,aqc-MIR399,osa-MIR399j,	ptc-MIR399i	aaaccagttgtagggtacctcttacttggcaagcaatggtgattgttgcaaacattgcagaatttgatctcggtgtctTGCCAAAGGAGAGTTGCCCTAtgactgttt	ptc-miR399i	TGCCAAAGGAGAGTTGCCCTA	3'	Diff	gp2b	...((((((((.((((..(((((((((..(((...(((((((.(((((((((((((((....)))))))))).)))))....((.....)).)))))))...)))..)))))))))..)))).))).)))))...	129	43	-60.4	1	46.5	103	47.5	9.5	5.5	18	47.8832	88.6849	50.9723	12.3219	5.47189	14.1889	middle
129	104	csn-miR399i_1ss7AG	TGCCAAGGGAGAGTTGCCCTA	21	Sc0004959	-	4272	4378	caataagcgaaccagttatagggcaacactccaacggcagctgttcctagtctttgggacgatcagtTGCCAAGGGAGAGTTGCCCTAcaattgcttcagcttaata	8	ptc-MIR399i,stu-MIR399i,mdm-MIR399d,cme-MIR399b,sly-MIR399,csi-MIR399b,aqc-MIR399,osa-MIR399j,	ptc-MIR399i	aaaccagttgtagggtacctcttacttggcaagcaatggtgattgttgcaaacattgcagaatttgatctcggtgtctTGCCAAAGGAGAGTTGCCCTAtgactgttt	ptc-miR399i	TGCCAAAGGAGAGTTGCCCTA	3'	Diff	gp2b	...((((((((.(((((.(((((((((.((((...((((((((.((((((...))))))....))))))))...)))).))))))))).))))).))).)))))...	101	47.7	-52.5	1	46.5	103	47.5	9.5	5.5	18	47.8832	88.6849	50.9723	12.3219	5.47189	14.1889	middle
130	105	csn-miR408-p5_2ss19GT20CT	TGCACTGCCTCTTCCCTGTT	20	Sc0001569	-	1017	1164	ccatgccaTGCACTGCCTGTTCCCTGTTtgctgtcaaattgtcttctggaggaagtttctgccgaccggccgaatttggtgctgacaggcaatctatggagtgccgatgaatccaataaatgccggtggaaattgcgaagtgccggta	44	vvi-MIR408,mtr-MIR408,gma-MIR408b,gma-MIR408c,gma-MIR408d,gma-MIR408a,ptc-MIR408,ath-MIR408,ppt-MIR408b,ppt-MIR408a,stu-MIR408b,stu-MIR408a,mdm-MIR408a,mdm-MIR408b,mdm-MIR408d,aly-MIR408,nta-MIR408,mes-MIR408,lus-MIR408a,cme-MIR408,cpa-MIR408,rco-MIR408,csi-MIR408,smo-MIR408,cca-MIR408,pta-MIR408,hbr-MIR408b,hbr-MIR408a,ahy-MIR408,vun-MIR408,dpr-MIR408,osa-MIR408,bdi-MIR408,sbi-MIR408,zma-MIR408b…	vvi-MIR408	aagaggaagacggggacgaggtagtgcatggatggaactattaacagaagaatgttaagctgtttttgctctacccATGCACTGCCTCTTCCCTGGCtctgtctctc	vvi-MIR408-p5	TGCACTGCCTCTTCCCTGGC	5'	New	gp2b	...((((..(((((((...((((......((....(((((.((((....)))))))))..))..((((((.....((((........((((.((....)).)))).......)))).....))))))))))...))..))))).))))	145	51.4	-40.6	0.5	0	0	0	6	7	11.5	0	0	0	7.78224	6.96422	9.06515	low
131	105	csn-miR408-p5_2ss19GT20CT	TGCACTGCCTCTTCCCTGTT	20	xpSc0054158	-	39444	39494	TGCACTGCCTGTTCCCTGTTtgctgtcaaattgtcttctgcaggaagtttc	44	vvi-MIR408,mtr-MIR408,gma-MIR408c,gma-MIR408a,gma-MIR408b,gma-MIR408d,ptc-MIR408,ath-MIR408,ppt-MIR408b,ppt-MIR408a,stu-MIR408b,stu-MIR408a,mdm-MIR408a,mdm-MIR408b,mdm-MIR408d,aly-MIR408,nta-MIR408,mes-MIR408,lus-MIR408a,cme-MIR408,cpa-MIR408,rco-MIR408,csi-MIR408,smo-MIR408,cca-MIR408,pta-MIR408,hbr-MIR408a,hbr-MIR408b,ahy-MIR408,vun-MIR408,dpr-MIR408,osa-MIR408,bdi-MIR408,sbi-MIR408,zma-MIR408a…	vvi-MIR408	aagaggaagacggggacgaggtagtgcatggatggaactattaacagaagaatgttaagctgtttttgctctacccATGCACTGCCTCTTCCCTGGCtctgtctctc	vvi-MIR408-p5	TGCACTGCCTCTTCCCTGGC	5'	New	gp2b	...(((.(((((.....(((((....)))))........))))).)))...	45	47.1	-9.2	0.4	0	0	0	6	7	11.5	0	0	0	7.78224	6.96422	9.06515	low
132	106	csn-miR408-p3_2ss18GT19GT	TGCACTGCCTCTTCCCTTT	19	Sc0002679	-	130301	130400	cttgtggtgtgctggcaaatgattgggctgtcctcacggtgccaacctagttgggatggtgaggtttgctttgatgcctttTGCACTGCCTCTTCCTTTT	43	vvi-MIR408,mtr-MIR408,gma-MIR408b,gma-MIR408c,gma-MIR408d,gma-MIR408a,ptc-MIR408,ath-MIR408,ppt-MIR408b,ppt-MIR408a,stu-MIR408b,mdm-MIR408a,mdm-MIR408b,mdm-MIR408d,aly-MIR408,nta-MIR408,mes-MIR408,lus-MIR408a,cme-MIR408,cpa-MIR408,rco-MIR408,csi-MIR408,smo-MIR408,cca-MIR408,pta-MIR408,hbr-MIR408b,hbr-MIR408a,ahy-MIR408,vun-MIR408,dpr-MIR408,osa-MIR408,bdi-MIR408,sbi-MIR408,zma-MIR408b,zma-MIR408a…	vvi-MIR408	aagaggaagacggggacgaggtagtgcatggatggaactattaacagaagaatgttaagctgtttttgctctacccATGCACTGCCTCTTCCCTGGCtctgtctctc	vvi-MIR408-p3	TGCACTGCCTCTTCCCTGG	3'	New	gp2b	...(..((((...((((.....(..(((...((((((..(.(((((...))))).)..))))))...)).)..)))))....))))..)...........	86	51	-32.6	0.6	0	1.5	0	5.5	3.5	12	0	1.29153	0	7.13372	3.48211	9.45929	low
133	106	csn-miR408-p3_2ss18GT19GT	TGCACTGCCTCTTCCCTTT	19	xpSc0055477	-	18209	18308	cttgtggtgtgctggcaaatgattgggctatcctcccggtgccaacctagttgggatcgtgaggtttgctttgatgcctttTGCACTGCCTCTTCCTTTT	43	vvi-MIR408,mtr-MIR408,gma-MIR408c,gma-MIR408a,gma-MIR408b,gma-MIR408d,ptc-MIR408,ath-MIR408,ppt-MIR408b,ppt-MIR408a,stu-MIR408b,mdm-MIR408a,mdm-MIR408b,mdm-MIR408d,aly-MIR408,nta-MIR408,mes-MIR408,lus-MIR408a,cme-MIR408,cpa-MIR408,rco-MIR408,csi-MIR408,smo-MIR408,cca-MIR408,pta-MIR408,hbr-MIR408a,hbr-MIR408b,ahy-MIR408,vun-MIR408,dpr-MIR408,osa-MIR408,bdi-MIR408,sbi-MIR408,zma-MIR408a,zma-MIR408b…	vvi-MIR408	aagaggaagacggggacgaggtagtgcatggatggaactattaacagaagaatgttaagctgtttttgctctacccATGCACTGCCTCTTCCCTGGCtctgtctctc	vvi-MIR408-p3	TGCACTGCCTCTTCCCTGG	3'	New	gp2b	...(..((((...((((.....(..(((...((((.((((.(((((...))))).)))).))))...)).)..)))))....))))..)...........	86	51	-33.5	0.7	0	1.5	0	5.5	3.5	12	0	1.29153	0	7.13372	3.48211	9.45929	low
134	107	csn-miR472-p3_2ss6TG18AT	TTTCCGACTCCGCCCATTCCAT	22	Sc0000034	-	1562399	1562567	ttcggagaaagcggaaagggaggtacaaagctctcggaatcttgcgggatgggcgagacggtaagagagagagagttctctcgaagttcgatcgatcgattgattctcTTTCCGACTCCGCCCATTCCATtggattccgattgctcctccctctcctcctttctccttt	2	ath-MIR472,aly-MIR472,	ath-MIR472	tctgtatgtatgtATGGTCGAAGTAGGCAAAATCtcacctttctagcagatcaacaatgaattttgtggaatagatgttggatttgtaaggttttggtgtttgcaagtgttgagatgcgcaagatttgagtaagaTTTTTCCTACTCCGCCCATACCatacatacacc	ath-MIR472-p3	TTTCCTACTCCGCCCATACCat	3'	New	gp2b	...((((((((.(((.(((((((.....(((..(((((((((...((((((((((((.(((.(((((((((((....))))).....((((((....)))))).)))))).))).)).))))))))))...)))))))))..)))))))))).)))..))))))))...	163	51.5	-92.7	1.1	295	310.5	148.5	183	186	503.5	303.775	267.346	159.355	237.358	185.049	396.896	middle
135	108	csn-miR472-p3_2ss6TG18AG	TTTCCGACTCCGCCCATGCCAT	22	Sc0000862	-	126186	126356	ttcggagaaaacggaaagggagctattgagctctcggaatcttgcgggatgggcgagacggtaagagagagagagagaggggtctctcgaagatcgatcgatcgattctcTTTCCGACTCCGCCCATGCCATtggattccgattgctcctccctctcctcctctctccttt	3	ath-MIR472,aly-MIR472,atr-MIR8558b,	ath-MIR472	tctgtatgtatgtATGGTCGAAGTAGGCAAAATCtcacctttctagcagatcaacaatgaattttgtggaatagatgttggatttgtaaggttttggtgtttgcaagtgttgagatgcgcaagatttgagtaagaTTTTTCCTACTCCGCCCATACCatacatacacc	ath-MIR472-p3	TTTCCTACTCCGCCCATACCat	3'	New	gp2b	...(((((....(((.((((((.....((((..(((((((((...((.(((((((((.(((.(((((((.((((((......))))))...((((....))))..))))))).))).)).))))))).))...)))))))))..)))))))))).))).....)))))...	165	53.8	-85.7	0.9	5146	5545.5	2628	3699.5	4067.5	8766	5299.08	4774.78	2820.11	4798.4	4046.71	6910.01	high
136	108	csn-miR472-p3_2ss6TG18AG	TTTCCGACTCCGCCCATGCCAT	22	xfSc0000012	-	8859	9019	gttggagaaagcggaaagggagcaaaagagctgttggaatcttgcggtatgggcgaggcggtaagagagagttctctcgatgatcgattgattgatactcTTTCCGACTCCGCCCATGCCATtggattccgattgctcctccctctcctcctctctccttt	3	ath-MIR472,aly-MIR472,atr-MIR8558b,	ath-MIR472	tctgtatgtatgtATGGTCGAAGTAGGCAAAATCtcacctttctagcagatcaacaatgaattttgtggaatagatgttggatttgtaaggttttggtgtttgcaagtgttgagatgcgcaagatttgagtaagaTTTTTCCTACTCCGCCCATACCatacatacacc	ath-MIR472-p3	TTTCCTACTCCGCCCATACCat	3'	New	gp2b	...(((((.((.(((.((((((.....((((..(((((((((...((((((((((..((((.(((((.(((....)))....(((((....))))).))))).))).)..))))))))))...)))))))))..)))))))))).)))..)).)))))...	155	51.6	-79.1	1	5146	5545.5	2628	3699.5	4067.5	8766	5299.08	4774.78	2820.11	4798.4	4046.71	6910.01	high
137	109	csn-miR472-p5_2ss7TG19AG	TTTTCCGACTCCGCCCATGCCAT	23	Sc0002293	+	135868	136002	taagaagcaaagaataccttattttattttTTTTCCGACTCCGCTCATGCCATcaaaactttcaagtaaacaacctattttattacaaatgaaaagaaaaaatatatgtaagaaactatttactcttgtttccaa	2	ath-MIR472,aly-MIR472,	ath-MIR472	tctgtatgtatgtATGGTCGAAGTAGGCAAAATCtcacctttctagcagatcaacaatgaattttgtggaatagatgttggatttgtaaggttttggtgtttgcaagtgttgagatgcgcaagatttgagtaagaTTTTTCCTACTCCGCCCATACCatacatacacc	ath-MIR472-p5	TTTTCCTACTCCGCCCATACCat	5'	New	gp2b	...(((((((.(((((.(((((..(((.(((((((.......((....)).........(((((((((((........)))))).....))))).))))))).))).)))))....)))))....)))))))...	129	26.7	-15.7	0.4	2	2.5	0	1.5	0	2	2.05949	2.15255	0	1.94556	0	1.57655	low
138	110	csn-miR472a	TTTTCCCTACTCCACCCATCCC	22	Sc0002444	+	42094	42181	tccaggcatggcggtcaaagtacttcttaacagtttgactatcataaactttcttcaccagagttgTTTTGCCTACTCCACCCATCCC	1	ptc-MIR472a,	ptc-MIR472a	ttatcgggtgggtgagcggggaagataactttggtttttgagatagtacttgttaTTTTCCCTACTCCACCCATCCCatag	ptc-miR472a	TTTTCCCTACTCCACCCATCCC	3'	Yes	gp2b	...(((((.(..(((((((((........))..)))))))..)...((((((.......))))))....)))))..............	71	44.3	-15.5	0.4	0	0	0	0	4	6	0	0	0	0	3.97955	4.72964	low
139	111	csn-miR477g-p5	CTCAAAGGCTTCCAATATT	19	Sc0002659	+	133794	133855	CTCAAAGGCTTCCAATATTgttgagttggccacaaagtgaccaaattgaatgtgtgggcaaa	3	mes-MIR477g,mes-MIR477f,cme-MIR477a,	mes-MIR477g	gacactgacattgctagaatggttagagaagcttccaATCTCCCTCAAAGGCTTCCAatattccaggccatggaaatgttggagacctttggaggggattgaaggcttactctcccatcatttaatgcaagcatagtttc	mes-MIR477g-p5	CTCAAAGGCTTCCAatatt	5'	New	gp2b	.......(((..((......(..(.((((.(((...))).)))).)..)...))..)))...	52	41.9	-12.8	0.5	0	0	0	0	4	3	0	0	0	0	3.97955	2.36482	low
140	112	csn-miR477a-p5_1ss19TG	CCCTCAAAGGCTTCCAATGTT	21	Sc0002659	-	129538	129601	CCCTCAAAGGCTTCCAATATTgttgagttggacacaaagtgaccaaattgaatgtgtgggcaaa	4	vvi-MIR477a,mes-MIR477g,mes-MIR477f,cme-MIR477a,	vvi-MIR477a	gaagttgtcaATCTCCCTCAAAGGCTTCCAAttttcctggctgattatcaaggttggaaagttggaagacagtgggggaccttggaagcttacc	vvi-MIR477a-p5	CCCTCAAAGGCTTCCAAtttt	5'	New	gp2b	.........(((..((......(..(.((((.(((...))).)))).)..)...))..)))...	52	42.2	-12.4	0.5	6	20.5	18.5	6.5	11.5	7.5	6.17848	17.6509	19.8524	8.43076	11.4412	5.91206	middle
141	112	csn-miR477a-p5_1ss19TG	CCCTCAAAGGCTTCCAATGTT	21	Sc0007330	-	3984	4097	acgcattggagaagtttccaactaCCCTCAAAGGCTTCCAATGTTccgagcattggtttccaatgtggaacattggttgctgcgagggtaattgaacacttactcctcttgagt	4	vvi-MIR477a,mes-MIR477g,mes-MIR477f,cme-MIR477a,	vvi-MIR477a	gaagttgtcaATCTCCCTCAAAGGCTTCCAAttttcctggctgattatcaaggttggaaagttggaagacagtgggggaccttggaagcttacc	vvi-MIR477a-p5	CCCTCAAAGGCTTCCAAtttt	5'	New	gp2b	((.((..((((((((...(((.(((((((...(((..((((((((((..(((((((...)))))))))))))))))..)))..))))))).)))...)))).))))...)).))	114	45.6	-51.4	1	6	20.5	18.5	6.5	11.5	7.5	6.17848	17.6509	19.8524	8.43076	11.4412	5.91206	middle
142	113	csn-miR477g-p5_1ss1CG	GCCTCAAAGGCTTCCAATATT	21	xfSc0000591	-	122485	122548	CCCTCAAAGGCTTCCAATATTgttgagttggccacaaagtgaccaaattgaatgtgtgggcaaa	4	vvi-MIR477a,mes-MIR477g,mes-MIR477f,cme-MIR477a,	mes-MIR477g	gacactgacattgctagaatggttagagaagcttccaATCTCCCTCAAAGGCTTCCAatattccaggccatggaaatgttggagacctttggaggggattgaaggcttactctcccatcatttaatgcaagcatagtttc	mes-MIR477g-p5	CCCTCAAAGGCTTCCAatatt	5'	New	gp2b	.........(((..((......(..(.((((.(((...))).)))).)..)...))..)))...	52	43.8	-12.8	0.5	0	1.5	2	0	0	0	0	1.29153	2.1462	0	0	0	low
143	114	csn-miR482-p5_2ss16CT17TC	AATTGTGGGAATGGGTCGATT	21	Sc0001004	-	231723	231866	gtaagagggagagggaaatagactaacaagaAATTGTGGGAATGGGTCGATTgggaaggaattcctttgggtattgccaaacgaaatcctTTCCTAAACCACCCATTCCtctgatttcttgatgtttttctctctccctttctt	7	vvi-MIR3633a,mdm-MIR482c,ppe-MIR482a,ppe-MIR482f,ppe-MIR482b,rgl-MIR5576,vun-MIR482,	vun-MIR482	tcagaaattgtgggaatgggctgattgggaagcaatgaaatcatctcaagtgattgtgcgtaatttTCTTCCCAATTCCGCCCATTCCTAtgatttctga	vun-MIR482-p5	aattgtgggaatgggctgatt	5'	New	gp2b	...(((((((((((((((..(((...(((((((((..((((((((((.....((((((((.(((.(((((......))))).))).))))))))......))))))))))..)))))))))..))))))))))))))))))...	138	41.7	-71.6	1.2	0	0	0	0	0	5	0	0	0	0	0	3.94137	low
143	115	csn-miR3633a-3p_R-3_1ss7TA	TTCCTAAACCACCCATTCC	19	Sc0001004	-	231723	231866	gtaagagggagagggaaatagactaacaagaAATTGTGGGAATGGGTCGATTgggaaggaattcctttgggtattgccaaacgaaatcctTTCCTAAACCACCCATTCCtctgatttcttgatgtttttctctctccctttctt	7	vvi-MIR3633a,mdm-MIR482c,ppe-MIR482a,ppe-MIR482f,ppe-MIR482b,rgl-MIR5576,vun-MIR482,	vvi-MIR3633a	gaaatgggagatgaatatttcgaaagcaataGGAATGGATGGTTAGGAGAGaactcctcttatatatttcttcatcttctccgccggagatgtggaagtgcagttggTTCCTATACCACCCATTCCCTAcggttttcgaaattttctcccttttc	vvi-miR3633a-3p	TTCCTATACCACCCATTCCCTA	3'	Diff	gp2b	...(((((((((((((((..(((...(((((((((..((((((((((.....((((((((.(((.(((((......))))).))).))))))))......))))))))))..)))))))))..))))))))))))))))))...	138	41.7	-71.6	1.2	171	250	261	143	151	180	176.087	215.255	280.079	185.477	150.228	141.889	middle
144	116	csn-miR482a-3p_R-1_2ss9CG21TG	TTCCCAAGGCCGCCCATTCCG	21	Sc0000029	-	281474	281636	gtgtttatggctggacatcggaatgaagttgcctacgtatcccaaagatgagaatcaagccttacatagttcggttctggttcactcgtgtattgacactctccttttgcgctctaacttTTGCCAAGGCCGCCCATTCCGagttttcaaccttgcgagctta	2	mdm-MIR482a,ppe-MIR482c,	mdm-MIR482a	gagaagagggaaagggagattggagctgctggaagttttAGGAATGGGCTGTTTGGGAAGAargaaaattacaagaataattgtcttgtggggtttcTTCCCAAGCCCGCCCATTCCTAtgatttccagctgttcctccctttcccttgtatctc	mdm-miR482a-3p	TTCCCAAGCCCGCCCATTCCTA	3'	Diff	gp2b	..((((..((.((((..((((((((..(..((((..(((......(((((.((((((((((..((...))..)))).))))))....((((....))))..........)).)))......)))..))))..).))))))))...)))).))....))))...	158	46.6	-38.1	0.5	3.5	5	2.5	2.5	2	5.5	3.60411	4.30509	2.68275	3.2426	1.98978	4.33551	low
145	117	csn-miR482a-3p_2ss9CG21TG	TTCCCAAGGCCGCCCATTCCGA	22	Sc0000029	-	302321	302357	tttgcggtctaacttTTGCCAAGGCCGCCCATTCCGA	2	mdm-MIR482a,ppe-MIR482c,	mdm-MIR482a	gagaagagggaaagggagattggagctgctggaagttttAGGAATGGGCTGTTTGGGAAGAargaaaattacaagaataattgtcttgtggggtttcTTCCCAAGCCCGCCCATTCCTAtgatttccagctgttcctccctttcccttgtatctc	mdm-miR482a-3p	TTCCCAAGCCCGCCCATTCCTA	3'	Diff	gp2b	...(((((((...........))))))).........	25	54.1	-9.9	0.5	1512.5	1281	764.5	590.5	644.5	1633.5	1557.49	1102.96	820.385	765.902	641.206	1287.65	middle
146	117	csn-miR482a-3p_2ss9CG21TG	TTCCCAAGGCCGCCCATTCCGA	22	Sc0002086	+	340409	340566	ttagaacttctgggagttataggaatggggttgcctgggaagaaaacaaagtcaatcgaggggttgatttgcaataaagagaacggtatgggacttgagaactatattatctttcTTCCCAAGGCCGCCCATTCCGAtgatttccagttgttcctccc	2	mdm-MIR482a,ppe-MIR482c,	mdm-MIR482a	gagaagagggaaagggagattggagctgctggaagttttAGGAATGGGCTGTTTGGGAAGAargaaaattacaagaataattgtcttgtggggtttcTTCCCAAGCCCGCCCATTCCTAtgatttccagctgttcctccctttcccttgtatctc	mdm-miR482a-3p	TTCCCAAGCCCGCCCATTCCTA	3'	Diff	gp2b	...((((..(((((((((((.((((((((...(((((((((((((...(((((((((....)))))))))...............((((((..........))))))....))))))))).))))..)))))))).)))))))))))..)))).....	150	44.3	-64.4	0.9	1512.5	1281	764.5	590.5	644.5	1633.5	1557.49	1102.96	820.385	765.902	641.206	1287.65	middle
147	118	csn-miR482-p3_2ss9TG21AG	TTCCCTACGCCACCCATTCCGT	22	Sc0000067	-	498422	498604	atagaaggaataagagggaaaggcagaagggtgagcaagaaattgtgggaatggagtgagtggggatggaaattcctttttattggagggtaaaagatgaatttattttctagggatccTTCCCTACGCCACCCATTCCGTcgatttcttggtttccctccctttccctttcttgtcctcgcc	2	mes-MIR482,hbr-MIR482a,	mes-MIR482	ggagaaaaagcaaggattttcggaaggttatgagatgggtaagtggggaagataactgtggggctttcgttttgtttgttaTCTTCCCTACTCCACCCATTCCatagctttccgatcgttcctctctctcc	mes-MIR482-p3	TTCCCTACTCCACCCATTCCat	3'	New	gp2b	...(.((((...(((((((((((....((((..(.((((((((((..(((((((.(((.(((((((.(((...((((......((((..(((((.......)))))..))))))))))).)))))))..))))))))))..)))))))))).)..)))).)))))))))))....)))))...	177	45.4	-82.2	1	2213	2384	1429	1781	2283	5003	2278.83	2052.67	1533.46	2310.03	2271.33	3943.74	high
148	119	csn-miR482b-p5_2ss3TA19TA	CCAATCCCTCCCATTCCTA	19	Sc0000458	-	534219	534277	ttgCCAATCCCACCCATTCCTAcaataggaattaaatcaaatttttttccggtaggtgc	4	mdm-MIR482b,mdm-MIR482d,pgi-MIR482b,pgi-MIR482a,	mdm-MIR482b	aggaagttgttggAATGGAAGGGTAGGAAAGAAGaaacttctcttgtatgttccaaattcaagagataaaattTCTTTCCTATCCCTCCCATTCCttckattttct	mdm-MIR482b-p5	CCTATCCCTCCCATTCCtt	5'	New	gp2b	..................(((((....((((..((((...))))..)))).)))))...	38	39	-8.8	0.4	4	14.5	8	13.5	22	39.5	4.11899	12.4848	8.5848	17.51	21.8875	31.1368	middle
149	120	csn-miR482d-p5_2ss12TC21TG	CATGCCACGCACTTCTATTGGT	22	Sc0000833	+	197188	197228	acaCATGCCACGCACTTCTATTGGTtgcacttggcatgaat	1	ppe-MIR482d,	ppe-MIR482d	aggcctcccagaggccaatgGAGATGGGTGGCTGGGAAGGAtcctcataatttctctacattttattaattgaaaactaaggaggtgacaaaataggggctcCCTCCCATGCCACGCATTTCTAttgtttctgggtttctctcc	ppe-MIR482d-p5	CATGCCACGCATTTCTAttgtt	5'	New	gp2b	...(((((((.(((((......)).)))...)))))))...	35	46.3	-13.2	0.7	19.5	39	17.5	6	10	6	20.0801	33.5797	18.7793	7.78224	9.94888	4.72964	middle
150	120	csn-miR482d-p5_2ss12TC21TG	CATGCCACGCACTTCTATTGGT	22	Sc0001695	+	434674	434714	acaCATGCCACGCACTTCTATTGGTtgcacttggcatgaat	1	ppe-MIR482d,	ppe-MIR482d	aggcctcccagaggccaatgGAGATGGGTGGCTGGGAAGGAtcctcataatttctctacattttattaattgaaaactaaggaggtgacaaaataggggctcCCTCCCATGCCACGCATTTCTAttgtttctgggtttctctcc	ppe-MIR482d-p5	CATGCCACGCATTTCTAttgtt	5'	New	gp2b	...(((((((.(((((......)).)))...)))))))...	35	46.3	-13.2	0.7	19.5	39	17.5	6	10	6	20.0801	33.5797	18.7793	7.78224	9.94888	4.72964	middle
151	121	csn-miR482b-p5_2ss9TA19AC	CCCAAACCACCCATTCCTC	19	Sc0000864	+	543807	543887	CCCAAACCACCCGTTCCTCctgctcccccggttgaaaagccatgtcctcctccgccgcctcctccgcagccaaaaacgcca	1	ppe-MIR482b,	ppe-MIR482b	agttgcagtagggagttaggGGAATGGGAGGATTGGGAAAAacatgcaccccaagtgttcgtgaatattacacaaggaacacaaaaaaggacttCTTCCCAAACCTCCCATTCCTAttatttcctacagttgctct	ppe-MIR482b-p5	CCCAAACCTCCCATTCCTA	5'	New	gp2b	...........((((....((((......((((....))))..((........))..........)))).....))))...	67	64.2	-10.2	0.2	0	0	4	2.5	0	0	0	0	4.2924	3.2426	0	0	low
152	121	csn-miR482b-p5_2ss9TA19AC	CCCAAACCACCCATTCCTC	19	xpSc0053648	+	127979	128117	CCCAAACCACCCATCCCTCccaccacccttattaaatttattgtcactgattgtcaattgataattttccattttccacaaagagtaactggagcaatgtcaactagcaaatcattaatattgtgaaaagagtaatgta	1	ppe-MIR482b,	ppe-MIR482b	agttgcagtagggagttaggGGAATGGGAGGATTGGGAAAAacatgcaccccaagtgttcgtgaatattacacaaggaacacaaaaaaggacttCTTCCCAAACCTCCCATTCCTAttatttcctacagttgctct	ppe-MIR482b-p5	CCCAAACCTCCCATTCCTA	5'	New	gp2b	...........(((..(((....(((...((((((.....((((....(((((((....)))))))...(((((((((...........))))).)))).......))))....))))))..)))....)))..)))..	126	35.3	-19.2	0.4	0	0	4	2.5	0	0	0	0	4.2924	3.2426	0	0	low
153	122	csn-miR482a-3p_L-2_2ss11TC14GT	TTCCCAATCCCTCCCATTCCTA	22	Sc0001004	-	269003	269142	attgtgtgaaagagaaaagggaggttaggcttcacaaagctgtaggatagagaggttttaggaagaaaattcataattttcTTCCCAATCCCTCCCATTCCTAtgactttatgtgctttctccattttccctcatacttc	22	gma-MIR482c,gma-MIR482a,mdm-MIR482a,mdm-MIR482b,mdm-MIR482d,cca-MIR6118,pab-MIR482b,pta-MIR482c,pde-MIR482b,pgi-MIR482b,pgi-MIR482a,vun-MIR482,pvu-MIR482,osa-MIR2118e,osa-MIR2118n,osa-MIR2118b,osa-MIR2118r,osa-MIR2118g,zma-MIR2118c,zma-MIR2118b,zma-MIR2118f,ata-MIR2118b,	gma-MIR482a	tcAGAATTTGTGGGAATGGGCTGAttgggaagcaatgtgtgctggtgcaatgcatttaattTCTTCCCAATTCCGCCCATTCCTAtgatttctga	gma-miR482a-3p	TCTTCCCAATTCCGCCCATTCCTA	3'	Diff	gp2b	...((((((..(.(((((.(((((..((((..((.((((..((((((....((((..((.(((((((((((...))))))))))).))..))))....))))))..)))).)).))))))))).))))).)))))))...	134	38.6	-50.7	0.9	12881	10588	6086.5	6387.5	7429	17910.5	13264.2	9116.46	6531.42	8284.84	7391.03	14118.4	high
154	123	csn-miR482d-p3_2ss10TC19TG	TGCCACGCACTTCTATTGGTT	21	Sc0001695	+	408812	408846	ttagcatggacgtaTGCCACGCACTTCTATTGGTT	1	ppe-MIR482d,	ppe-MIR482d	aggcctcccagaggccaatgGAGATGGGTGGCTGGGAAGGAtcctcataatttctctacattttattaattgaaaactaaggaggtgacaaaataggggctcCCTCCCATGCCACGCATTTCTAttgtttctgggtttctctcc	ppe-MIR482d-p3	TGCCACGCATTTCTAttgttt	3'	New	gp2b	...((.(((.......))).)).............	19	45.7	-4.8	0.3	5.5	9	2.5	3	5.5	5	5.66361	7.74917	2.68275	3.89112	5.47189	3.94137	low
155	124	csn-miR482d-p5_2ss13CT17CT	TATATACACACATACATACACA	22	Sc0002340	+	202186	202257	TATATACACACATACATACACAtaaattttttttttcatttgttctctaatggttaccactgtatgtatcaa	1	gra-MIR482d,	gra-MIR482d	actggaaatttttggaagtggggtgcgaggaaagatcatttctcttctctcttatatatatacacacacacacacacacacacatacaaagagatcaaaccagatcTTTCCTATGCCCCCCATTCCACtgatttctag	gra-MIR482d-p5	tatatacacacacacacacaca	5'	New	gp2b	...........(((((((((...(((....)))..(((((........))))).......)))))))))...	58	25	-7.5	0.4	3.5	2	0	0	0	0	3.60411	1.72204	0	0	0	0	low
156	125	csn-miR482a-3p_R-3_1ss9CG	TTCCCAAGGCCGCCCATTC	19	Sc0002927	-	172691	172803	TTCCCAAGGCCGCCCTTTCtgggttttcaatcttgtgagctcagtttttattatttcaaatttttcatgctctaacttttgcctaggtcgcccttttgggttttcggcctagc	2	mdm-MIR482a,ppe-MIR482c,	mdm-MIR482a	gagaagagggaaagggagattggagctgctggaagttttAGGAATGGGCTGTTTGGGAAGAargaaaattacaagaataattgtcttgtggggtttcTTCCCAAGCCCGCCCATTCCTAtgatttccagctgttcctccctttcccttgtatctc	mdm-miR482a-3p	TTCCCAAGCCCGCCCATTCCTA	5'	Diff	gp2b	......((((((.....(((((((............((((............................))))........)))))))..((((....))))...))))))...	104	43.4	-27	0.6	1.5	0	1.5	0	3	0	1.54462	0	1.60965	0	2.98467	0	low
157	126	csn-miR482d-p3_2ss13CT17CT	TATATACACACATACATACACA	22	Sc0003821	+	137161	137187	atataTATATACACACATACATACACA	2	gra-MIR482d,gra-MIR482d,	gra-MIR482d	actggaaatttttggaagtggggtgcgaggaaagatcatttctcttctctcttatatatatacacacacacacacacacacacatacaaagagatcaaaccagatcTTTCCTATGCCCCCCATTCCACtgatttctag	gra-MIR482d-p3	tatatacacacacacacacaca	3'	New	gp2b	...(((.(((......))).)))....	20	22.2	1.9	-0.3	3.5	2	0	0	0	0	3.60411	1.72204	0	0	0	0	low
158	127	csn-miR482a-3p_2ss18TC21TA	TTTCCAATTCCACCCATCCCAA	22	Sc0006156	-	9423	9515	TTCCCAATTCCACCCATCCCAAccaccgagatcactgctcgttgtgattgattttggtcaaccattctgcttatcagttcatatttgggagat	7	stu-MIR482a,stu-MIR482c,nta-MIR482a,nta-MIR482c,sly-MIR482a,sly-MIR482d,pgi-MIR2118,	stu-MIR482a	gagtttttcgaaaatctatgGGAATTGGTGGATTGGAAAGCttttattttcttctgattagcTTTCCAATTCCACCCATTCCTAtggtttttcggtatcctctc	stu-miR482a-3p	TTTCCAATTCCACCCATTCCTA	5'	Diff	gp2b	(((((((.................((((((((((..((.....))...))))))))))........(((.....))).......)))))))..	91	44.1	-19.4	0.5	0	0	0	0	1.5	4.5	0	0	0	0	1.49233	3.54723	low
159	127	csn-miR482a-3p_2ss18TC21TA	TTTCCAATTCCACCCATCCCAA	22	xfSc0001832	-	12271	12308	agagtggtcTTCCCAATTCCACCCATCCCAAccaccga	7	stu-MIR482a,stu-MIR482c,nta-MIR482c,nta-MIR482a,sly-MIR482a,sly-MIR482d,pgi-MIR2118,	stu-MIR482a	gagtttttcgaaaatctatgGGAATTGGTGGATTGGAAAGCttttattttcttctgattagcTTTCCAATTCCACCCATTCCTAtggtttttcggtatcctctc	stu-miR482a-3p	TTTCCAATTCCACCCATTCCTA	3'	Diff	gp2b	...(((((......................)))))...	32	55.3	-3.7	0.2	0	0	0	0	1.5	4.5	0	0	0	0	1.49233	3.54723	low
160	128	csn-miR530a_R-1_1ss8GA	TGCATTTACACCTGCACCT	19	Sc0003075	+	82186	82267	aactaattcagataagaggtcagatgccacaaatgccaagtctacccttggagcTGCATTTACACCTGCACCTgaattgctc	18	ptc-MIR530a,gra-MIR530a,gra-MIR530b,stu-MIR530,ppe-MIR530,mes-MIR530b,mes-MIR530a,lus-MIR530b,lus-MIR530a,cme-MIR530a,tcc-MIR530b,tcc-MIR530a,csi-MIR530a,htu-MIR530,osa-MIR530,bdi-MIR530a,bdi-MIR530b,tae-MIR530,	ptc-MIR530a	gccaacatgttgcctttatcTGCATTTGCACCTGCACCTTacttgtttctttcttttgtttttgactccaaaaccaaaagtaagtttgaaacattaaaacaagcttgaggtgcaggtgcaggtgcaggtgaatgccatgttggt	ptc-miR530a	TGCATTTGCACCTGCACCTT	3'	Diff	gp2b	...((((((((...((..((.((((((........(((((......)))))....))))))))..))....))))))))...	76	45.1	-20.1	0.5	11	10	11.5	7	10	13.5	11.3272	8.61018	12.3407	9.07927	9.94888	10.6417	middle
161	129	csn-miR530a_R+1_1ss8GA	TGCATTTACACCTGCACCTTG	21	xfSc0022305	-	860	1009	gcctcaaggtgtctttcattttttcTGCATTTACACCTGCACCTTGtcacttacttgctagggttcttaaattgttaaaacattttacaaaccctagattggtattggagaggtgcaagagtgagtgcagacaaaatggcatcttggttg	19	ptc-MIR530a,gra-MIR530a,gra-MIR530b,stu-MIR530,ppe-MIR530,mes-MIR530b,mes-MIR530a,lus-MIR530b,lus-MIR530a,cme-MIR530a,tcc-MIR530b,tcc-MIR530a,csi-MIR530a,csi-MIR530b,htu-MIR530,osa-MIR530,bdi-MIR530a,bdi-MIR530b,tae-MIR530,	ptc-MIR530a	gccaacatgttgcctttatcTGCATTTGCACCTGCACCTTacttgtttctttcttttgtttttgactccaaaaccaaaagtaagtttgaaacattaaaacaagcttgaggtgcaggtgcaggtgcaggtgaatgccatgttggt	ptc-miR530a	TGCATTTGCACCTGCACCTT	5'	Diff	gp2b	...(((((((((....((((((.(((((((((((...((((((((..((..((((..((((((((..((((.(((....))).))))..))))))))...)))).))..))))))))...))))))))))).)))))))))))))))...	144	40	-64.6	1.1	569	853	469.5	210	281	707.5	585.926	734.449	503.821	272.378	279.564	557.704	middle
162	130	csn-miR535a_1ss5AC	TGACCACGAGAGAGAGCACGC	21	Sc0000837	-	206174	206315	tTGACCACGAGAGAGAGCACCCcaagagggcgtttacccgcagttcgaatgcaagcacgtgtagtgttgcagctgccagaacttccgatgtgggcatggtcactaccaccactccaaaaatagccaatcctttcgctggtac	19	vvi-MIR535a,vvi-MIR535b,vvi-MIR535c,ppt-MIR535b,ppt-MIR535d,ppt-MIR535c,ppt-MIR535a,mdm-MIR535d,mdm-MIR535a,ppe-MIR535a,ppe-MIR535b,mes-MIR535b,mes-MIR535a,cpa-MIR535,rco-MIR535,aqc-MIR535,pab-MIR535,atr-MIR535,osa-MIR535,	vvi-MIR535c	tgtaattgctTGACAACGAGAGAGAGCACGCtagtctgcattcatgcgaggaacatgactgtgtacaggcgtgctctctgtcgctgtcatacaatcttctc	vvi-miR535a	TGACAACGAGAGAGAGCACGC	5'	Diff	gp2b	...((((((((((.((((..((((...((..((((....(((((.....(((((.(((.....)))))))))))))..))))..))....))))..((((....))))..............))...)))))))).))))..	137	53.5	-41.4	0.5	251.5	293.5	750	705	4	3.5	258.981	252.709	804.825	914.413	3.97955	2.75896	middle
163	130	csn-miR535a_1ss5AC	TGACCACGAGAGAGAGCACGC	21	xfSc0000495	-	53041	53182	tTGACCACGAGAGAGAGCACCCcaagagggcgtttacccgcagttcgaatgcaagcacgtgtagtgttgcagctgccagaacttccgatgtgggcatggtcactaccaccactccaaaaacagccaatcctttcgctggtac	19	vvi-MIR535a,vvi-MIR535b,vvi-MIR535c,ppt-MIR535b,ppt-MIR535d,ppt-MIR535c,ppt-MIR535a,mdm-MIR535d,mdm-MIR535a,ppe-MIR535a,ppe-MIR535b,mes-MIR535b,mes-MIR535a,cpa-MIR535,rco-MIR535,aqc-MIR535,pab-MIR535,atr-MIR535,osa-MIR535,	vvi-MIR535c	tgtaattgctTGACAACGAGAGAGAGCACGCtagtctgcattcatgcgaggaacatgactgtgtacaggcgtgctctctgtcgctgtcatacaatcttctc	vvi-miR535a	TGACAACGAGAGAGAGCACGC	5'	Diff	gp2b	...((((((((((.((((..((((...((..((((....(((((.....(((((.(((.....)))))))))))))..))))..))....))))..((((....))))..............))...)))))))).))))..	137	54.2	-41.4	0.5	251.5	293.5	750	705	4	3.5	258.981	252.709	804.825	914.413	3.97955	2.75896	middle
164	131	csn-miR535a_L-1_1ss5AC	GACCACGAGAGAGAGCACGC	20	Sc0002170	-	188905	189046	ttGACCACGAGAGAGAGCAGGCctagagggcatttacccgcagtttgaatgcaggcacgagtagtgctgcagctgccaagactttagatgtgggcatggtcactacccccactccaaaaatagccaatccctttgctggtac	17	vvi-MIR535a,vvi-MIR535b,vvi-MIR535c,ppt-MIR535d,ppt-MIR535c,ppt-MIR535a,ppt-MIR535b,mdm-MIR535a,mdm-MIR535d,ppe-MIR535a,ppe-MIR535b,cpa-MIR535,rco-MIR535,aqc-MIR535,pab-MIR535,atr-MIR535,osa-MIR535,	vvi-MIR535c	tgtaattgctTGACAACGAGAGAGAGCACGCtagtctgcattcatgcgaggaacatgactgtgtacaggcgtgctctctgtcgctgtcatacaatcttctc	vvi-miR535a	TGACAACGAGAGAGAGCACGC	5'	Diff	gp2b	...((((..((((.((...(((((((((((......)).(((((.....(((((.(((.....))))))))))))).....))))))..(((((...(((....))))))))..........)))..)).))))..))))..	137	52.8	-41.4	0.6	0	1.5	2.5	2.5	0	0	0	1.29153	2.68275	3.2426	0	0	low
165	131	csn-miR535a_L-1_1ss5AC	GACCACGAGAGAGAGCACGC	20	xfSc0000325	-	35628	35705	GACCACGAGAGAGAGCAGGCcaagagggcatttacccgcagtacgaatgcaggcacaagtaatgctacggctgtcaaa	17	vvi-MIR535a,vvi-MIR535b,vvi-MIR535c,ppt-MIR535b,ppt-MIR535d,ppt-MIR535c,ppt-MIR535a,mdm-MIR535d,mdm-MIR535a,ppe-MIR535a,ppe-MIR535b,cpa-MIR535,rco-MIR535,aqc-MIR535,pab-MIR535,atr-MIR535,osa-MIR535,	vvi-MIR535c	tgtaattgctTGACAACGAGAGAGAGCACGCtagtctgcattcatgcgaggaacatgactgtgtacaggcgtgctctctgtcgctgtcatacaatcttctc	vvi-miR535a	TGACAACGAGAGAGAGCACGC	5'	Diff	gp2b	..........((.(((..(((....(((......)))(((.......))).)))....(((....))).))).))...	65	53.8	-17.6	0.4	0	1.5	2.5	2.5	0	0	0	1.29153	2.68275	3.2426	0	0	low
166	132	csn-miR535a-p5_2ss18AT19CT	TGACAACGAGAGAGAGCTT	19	Sc0002184	-	331602	331694	TGACAACGAGAGAGAGCATcccaagaggccatttacgcacagttcgaatgtaggcacgagtagtgctgcagctgccaggacttctgatgtggg	17	vvi-MIR535a,vvi-MIR535b,vvi-MIR535c,ppt-MIR535d,ppt-MIR535c,ppt-MIR535a,ppt-MIR535b,mdm-MIR535a,ppe-MIR535a,mes-MIR535b,mes-MIR535a,cpa-MIR535,rco-MIR535,aqc-MIR535,pab-MIR535,atr-MIR535,osa-MIR535,	vvi-MIR535a	tgtaattgctTGACAACGAGAGAGAGCACGCtagtcagcattcatgcgaggaacatgactgtgtacaggcgtgctctctctcgctgtcatacaatcttctc	vvi-MIR535a-p5	TGACAACGAGAGAGAGCAC	5'	New	gp2b	...............(((((...(((((((......((((..((((..((....))))))..)))).((....))..)).))))))))))...	75	53.8	-21.5	0.4	0	0	0	0	0	3	0	0	0	0	0	2.36482	low
167	133	csn-miR821b-p3_2ss15TG21AT	TTTATTTTTGTTATGTCTTCT	21	Sc0000601	+	360267	360366	ttgggaagatgtaagctagcatggcatttaattgtatgttaagcttttataaacaaactctgatgaatgaaagcatTTTATTTTTGTTATATCTTCTgca	1	osa-MIR821b,	osa-MIR821b	ctaaatgatttcaattgaaaAAGTCATCAACAAAAAAGTTGAATaacttatcaagatctaaaacttttatttttgttatttcttcatccgacgaaatgttagtaatattattcacaaattttacatatatgtgttaaagtttataaaaccagataagagatatgacaattttataaataatgttaccatcactttgtcgtatgaagaaataaccacaataaaagttttagatcttgaagagttattcaactttgttgttgatgactttttcagttgatatcatttag	osa-MIR821b-p3	tttatttttgttatttcttca	3'	New	gp2b	...(((((((((((..(((((((.((......))))))))).((((((((...((.....))....))))))))............)))))))))))...	94	29	-23.2	0.8	11	22.5	17.5	0	2	0	11.3272	19.3729	18.7793	0	1.98978	0	middle
168	134	csn-miR821b-p5_2ss15TG21AT	TTTATTTTTGTTATGTCTTCT	21	Sc0001138	-	309800	309850	ttTTTATTTTTGTTATGTCTTCTtgaccttgtaagaccttttcttgacctt	1	osa-MIR821b,	osa-MIR821b	ctaaatgatttcaattgaaaAAGTCATCAACAAAAAAGTTGAATaacttatcaagatctaaaacttttatttttgttatttcttcatccgacgaaatgttagtaatattattcacaaattttacatatatgtgttaaagtttataaaaccagataagagatatgacaattttataaataatgttaccatcactttgtcgtatgaagaaataaccacaataaaagttttagatcttgaagagttattcaactttgttgttgatgactttttcagttgatatcatttag	osa-MIR821b-p5	tttatttttgttatttcttca	5'	New	gp2b	................(((.....)))....(((((.....))))).....	11	29.4	-3.1	0.2	11	22.5	17.5	0	2	0	11.3272	19.3729	18.7793	0	1.98978	0	middle
169	135	csn-miR821b-p5_2ss14TG20AT	TTATTTTTGTTATGTCTTCT	20	Sc0001230	-	157231	157370	TTATTTTTTTTATGTCTTCTgcttatgaattttgttacatttgggtgagtaattgttgaatggagttgtttttttgtaattaattattactcattgtgatcacaatatggctacattctcttattttgatctaatcacca	1	osa-MIR821b,	osa-MIR821b	ctaaatgatttcaattgaaaAAGTCATCAACAAAAAAGTTGAATaacttatcaagatctaaaacttttatttttgttatttcttcatccgacgaaatgttagtaatattattcacaaattttacatatatgtgttaaagtttataaaaccagataagagatatgacaattttataaataatgttaccatcactttgtcgtatgaagaaataaccacaataaaagttttagatcttgaagagttattcaactttgttgttgatgactttttcagttgatatcatttag	osa-MIR821b-p5	ttatttttgttatttcttca	5'	New	gp2b	........((((((.........))))))............(((.((((((((..(((((..(((......)))..)..))))..))))))))....(((((.((((.((........)).)))).)))))......)))	21	26.4	-18.6	0.5	1.5	2.5	3	0	0	0	1.54462	2.15255	3.2193	0	0	0	low
170	136	csn-miR828-3p_1ss22AG	AGATGCTCATTTGAGCAAGCAG	22	Sc0000915	-	686150	686182	tatctgAGATGCTCATTTGAGCAAGCAGcgtta	5	gma-MIR828b,ath-MIR828,mdm-MIR828a,aly-MIR828,lus-MIR828a,	aly-MIR828	catggacaaagtcacaaaagtgataaaatctccttccactttctaatgttTCTTGCTTAAATGAGTATTCCAtgtaaaaaatgagtcactcactcatatgggtgggttgggttggttttctcttcatgAGATGCTCATTTGAGCAAGCAAtgtctgtgagtggaactatttagtatcatgttatgaattttgtcttttg	aly-miR828-3p	AGATGCTCATTTGAGCAAGCAA	3'	Diff	gp2b	...(((...(((((....)))))..))).....	25	42.4	-9	0.6	9	4	3	21	19	38	9.26772	3.44407	3.2193	27.2378	18.9029	29.9544	middle
171	137	csn-miR828a-p3_2ss18AG22CT	AATGAGTATTCCAAACAGCAGT	22	Sc0001157	-	202872	202923	gatactgctggtaatgtttcttgctcaAATGAGTATTCCAAACAGCAGTtcc	1	vvi-MIR828a,	vvi-MIR828a	tataaagttTCTTGCTCAAATGAGTATTCCAaacaacagcttgtgaagcaatgattactgtcatagtctctgcatgtggattgttgttgagatgctcatttgaggaagcaaccttaaaaatg	vvi-MIR828a-p3	AATGAGTATTCCAaacaacagc	3'	New	gp2b	((.(((((((....((.....(((((....)))))...))..))))))))).	51	40.4	-14.7	0.7	2	4	0	0	3	6	2.05949	3.44407	0	0	2.98467	4.72964	low
172	137	csn-miR828a-p3_2ss18AG22CT	AATGAGTATTCCAAACAGCAGT	22	xpSc0055460	-	355	503	tatgaatgctttagagagagagagagagagagagagagagagagagagagataaagaggaagagagtctgtgtacatgtggttccatgcaagtgaattggatccctcctggtaatgtttcttgctcaAATGAGTATTCCAAACAGCAGT	1	vvi-MIR828a,	vvi-MIR828a	tataaagttTCTTGCTCAAATGAGTATTCCAaacaacagcttgtgaagcaatgattactgtcatagtctctgcatgtggattgttgttgagatgctcatttgaggaagcaaccttaaaaatg	vvi-MIR828a-p3	AATGAGTATTCCAaacaacagc	3'	New	gp2b	...((((((((....(((..(((((.......((.(((..........((((.............))))..........((.((((...........)))).))))))).......)))))..)))....))))))))...........	135	42.3	-24.2	0.4	2	4	0	0	3	6	2.05949	3.44407	0	0	2.98467	4.72964	low
173	138	csn-miR845d_R+3_2ss1TA19AT	AGGCTCTGATACCAATTGTTGGGA	24	Sc0001390	+	190284	190317	ccaccaacgAGGCTCTGATACCAATTGTTGGGAt	2	vvi-MIR845e,vvi-MIR845d,	vvi-MIR845d	ataaccaacattaattatccctagggccatgggataaacaaaaactctgcaaaaccaagttagcacaccctagaatggttctagcacaattactaacctaTGGCTCTGATACCAATTGATGggaaaaacct	vvi-miR845d	TGGCTCTGATACCAATTGATG	3'	Diff	gp2b	...(((((((((........))..)))))))...	28	50	-8.3	0.5	3.5	1.5	0	0	0	0	3.60411	1.29153	0	0	0	0	low
174	138	csn-miR845d_R+3_2ss1TA19AT	AGGCTCTGATACCAATTGTTGGGA	24	Sc0001749	+	39526	39579	AGGCTCTGATACCAATTGTTGGGAtctgggatcccgcccaagaccttatagaaa	2	vvi-MIR845e,vvi-MIR845d,	vvi-MIR845d	ataaccaacattaattatccctagggccatgggataaacaaaaactctgcaaaaccaagttagcacaccctagaatggttctagcacaattactaacctaTGGCTCTGATACCAATTGATGggaaaaacct	vvi-miR845d	TGGCTCTGATACCAATTGATG	5'	Diff	gp2b	....((((.......(((.(((((((...)))))))..))).......))))..	26	48.1	-11	0.4	3.5	1.5	0	0	0	0	3.60411	1.29153	0	0	0	0	low
175	139	csn-miR858-p5_1ss4TG	CTAGGCTTGTCAAGTGAGCAG	21	Sc0000114	-	1179091	1179176	tgCTAGGCTTGTCAAGTGAGCAGtcttttgcggttagcctttgtTTCGTTGTCTGTTCGACCTTGaactcatggtcgataagaaga	6	ath-MIR858a,ath-MIR858b,mdm-MIR858,aly-MIR858,ppe-MIR858,cme-MIR858,	mdm-MIR858	catgctatgcttgtcaagtgagcagtcctttgcaaattaatcttagtTTCGTTGTCTGTTCGACCTGAaactacggtaaaggctaggtatatagtacccctgaaaaccctaattagaaagtaatcatgtttttttatatagattaatcaacttgattgaccatctaacaaattaaacaaggcagcttcgtattatagataactatatattgygtagcatcttggtatttgacctcgtaacctaaattatagagttactttaatgcataaaagagtcattaacctagaaagaagaaagtaaattaaaactcccaatcttaatcctgtttatgcatttattggataattcatttggaaagtggtttaggtatatcttttggctccttcttttcctttcgaa…	mdm-MIR858-p5	ctatgcttgtcaagtgagcag	5'	New	gp2b	.((.(((((..((......((((....))))))..)))))..)).......(((..((((((.((....)).))))))..)))...	43	45.3	-21.4	0.5	24.5	33.5	13	29.5	21.5	36.5	25.2288	28.8441	13.9503	38.2627	21.3901	28.772	middle
175	140	csn-miR858a_L-1R+1	TTCGTTGTCTGTTCGACCTTG	21	Sc0000114	-	1179091	1179176	tgCTAGGCTTGTCAAGTGAGCAGtcttttgcggttagcctttgtTTCGTTGTCTGTTCGACCTTGaactcatggtcgataagaaga	6	ath-MIR858a,ath-MIR858b,mdm-MIR858,aly-MIR858,ppe-MIR858,cme-MIR858,	ath-MIR858a	ctcatctttgTTTCGTTGTCTGTTCGACCTTggtctcgatctctcctcaaaaccctaatacgcgctttatcgtttatttcattcatccatccttcttatgatcatcataaactaacgtacatggtttatcggtttgttattgatggggattggggtagatagacgatcgaaacttttgatttctgag	ath-miR858a	TTTCGTTGTCTGTTCGACCTT	3'	Diff	gp2b	.((.(((((..((......((((....))))))..)))))..)).......(((..((((((.((....)).))))))..)))...	43	45.3	-21.4	0.5	13366	13384	9999	14385.5	15919	19019	13763.6	11523.9	10729.9	18658.6	15837.6	14992.2	high
176	139	csn-miR858-p5_1ss4TG	CTAGGCTTGTCAAGTGAGCAG	21	Sc0002146	+	151657	151748	atcgacaacgggtgagtggtttccttgCTAGGCTTGTCAAGTGAACAGtctttcgctatgagcctttgtTTCGTTGTCTGTTCGACCTTGaa	6	ath-MIR858a,ath-MIR858b,mdm-MIR858,aly-MIR858,ppe-MIR858,cme-MIR858,	mdm-MIR858	catgctatgcttgtcaagtgagcagtcctttgcaaattaatcttagtTTCGTTGTCTGTTCGACCTGAaactacggtaaaggctaggtatatagtacccctgaaaaccctaattagaaagtaatcatgtttttttatatagattaatcaacttgattgaccatctaacaaattaaacaaggcagcttcgtattatagataactatatattgygtagcatcttggtatttgacctcgtaacctaaattatagagttactttaatgcataaaagagtcattaacctagaaagaagaaagtaaattaaaactcccaatcttaatcctgtttatgcatttattggataattcatttggaaagtggtttaggtatatcttttggctccttcttttcctttcgaa…	mdm-MIR858-p5	ctatgcttgtcaagtgagcag	5'	New	gp2b	...(((((((.(..((.......))..).(((((..(..((((((......)))))))..)))))......)))))))..............	36	46.7	-25.9	0.6	24.5	33.5	13	29.5	21.5	36.5	25.2288	28.8441	13.9503	38.2627	21.3901	28.772	middle
176	140	csn-miR858a_L-1R+1	TTCGTTGTCTGTTCGACCTTG	21	Sc0002146	+	151657	151748	atcgacaacgggtgagtggtttccttgCTAGGCTTGTCAAGTGAACAGtctttcgctatgagcctttgtTTCGTTGTCTGTTCGACCTTGaa	6	ath-MIR858a,ath-MIR858b,mdm-MIR858,aly-MIR858,ppe-MIR858,cme-MIR858,	ath-MIR858a	ctcatctttgTTTCGTTGTCTGTTCGACCTTggtctcgatctctcctcaaaaccctaatacgcgctttatcgtttatttcattcatccatccttcttatgatcatcataaactaacgtacatggtttatcggtttgttattgatggggattggggtagatagacgatcgaaacttttgatttctgag	ath-miR858a	TTTCGTTGTCTGTTCGACCTT	3'	Diff	gp2b	...(((((((.(..((.......))..).(((((..(..((((((......)))))))..)))))......)))))))..............	36	46.7	-25.9	0.6	13366	13384	9999	14385.5	15919	19019	13763.6	11523.9	10729.9	18658.6	15837.6	14992.2	high
177	141	csn-miR894_1ss3TA	CGATTCACGTCGGGTTCACC	20	xpSc0053228	-	454618	454721	aaataaaaatctgcactcttcacccttggctgaccgaaatgattggagaaaccgtccacgagttgtCGATTCAAGTCGGGTTCACCttgggcagatttttgaac	1	ppt-MIR894,	ppt-MIR894	cataattcaaataatccaaaaaaaataaaccaaataccttccacctcaagCGTTTCACGTCGGGTTCACCaaatatgttgtattatgtgaagttttgattgagaatgcaccgagcacttggctatggaaggtaaaagaaaattgcaacaaaaagtcctaacaatccaataggattatagaaaatttataattaaacgttaacaatcataatcaaacaata	ppt-miR894	CGTTTCACGTCGGGTTCACC	3'	Diff	gp2b	...(((((((((((.........((..((.(((((((..(((...((.((..((....))..)).))...)))..))))..)))))..)))))))))))))...	98	45.2	-28.7	0.6	16	26	25	15	9	18	16.476	22.3865	26.8275	19.4556	8.954	14.1889	middle
178	142	csn-miR1427-p3_2ss16GA18AC	CGGCGCCGGCCTGCGAGC	18	Sc0000030	+	952449	952520	cgtggctggcagcgtgcgccctcgggcgtgcttcggcatctgcgcgatccCGGCGCCGGCCTGCGAGCtccc	1	osa-MIR1427,	osa-MIR1427	tggctgcgcgcgaccgcgccgtcccgcaggccagcgccgcgccaccgcgcggttccgcagcagggacatgcgccacccgttacagccaactgaaatctgcactgatttgattacatgcgcacgtatatatgcagtgcatgcagcgagtgtgcgctgttcctggattcggtcgcgcgtggccgtgcTGCGGAACCGTGCGGTGGCGCggcgccggcctgcgggaccgcgcagtcgcgcgcagccaagccacgggaccg	osa-MIR1427-p3	Cggcgccggcctgcggga	3'	New	gp2b	...((((.((((((.(((((.(((.((((((....))))..)).)))....)))))))..)))).))))...	66	77.8	-36.5	0.7	0	0	0	0	6	2	0	0	0	0	5.96933	1.57655	low
179	143	csn-miR1427-p5_2ss16GA18AC	CGGCGCCGGCCTGCGAGC	18	Sc0004507	+	73804	73940	ccCGGCGCCGGCCTGCGAGCtccccattcggcccgtcttgaaacacagaccaaggagtctgacatgtgtgcgagtcaacgggtgagtaaactcgtaaggcgcaaggaagctgattgacgggatcccctcacgggttg	1	osa-MIR1427,	osa-MIR1427	tggctgcgcgcgaccgcgccgtcccgcaggccagcgccgcgccaccgcgcggttccgcagcagggacatgcgccacccgttacagccaactgaaatctgcactgatttgattacatgcgcacgtatatatgcagtgcatgcagcgagtgtgcgctgttcctggattcggtcgcgcgtggccgtgcTGCGGAACCGTGCGGTGGCGCggcgccggcctgcgggaccgcgcagtcgcgcgcagccaagccacgggaccg	osa-MIR1427-p5	Cggcgccggcctgcggga	5'	New	gp2b	(((((((((....((((((......((((.((((((((((..((((((((......)))))...)))...))))...))))))))))...)))))).)))))..(((..(((.....)))..))).....))))...	98	60.6	-46.4	0.6	0	0	0	0	6	2	0	0	0	0	5.96933	1.57655	low
180	144	csn-miR1446_R-1_1ss19GT	TGAACTCTCTCCCTCAATTGC	21	Sc0007330	-	324	454	tctggagaatcaactttttcTGAACTCTCTCCCTCAATTGCtaagctcactctagctagcaccatttggaaaagcttgagatagaggagagccattgagtgtgggagttctgaaaatgttggctctctctc	4	ptc-MIR1446c,ptc-MIR1446e,ptc-MIR1446d,nta-MIR1446,	nta-MIR1446	cagcgttttcTGAACTCTCTCCCTCAATGGCTgctcatatatatatagccatgcttcttaattaattaaagaacagccatgagagattgagttcagaaaactctggc	nta-miR1446	TGAACTCTCTCCCTCAATGGCT	5'	Diff	gp2b	...(((((..((((.(((((.((((((((...((((((.(((...(((.(((.((((....((....))...)))).)))...)))...))).))))))...)))))))).))))).))))..)))))...	125	44.3	-51.2	0.9	2	1.5	0	2	2	9	2.05949	1.29153	0	2.59408	1.98978	7.09447	low
181	144	csn-miR1446_R-1_1ss19GT	TGAACTCTCTCCCTCAATTGC	21	xpSc0053498	+	209438	209568	tctggagaatcaactttttcTGAACTCTCTCCCTCAATTGCtaagctcactctagctagcaccatttggaaaagcttgagatagaggagagccattgagtgtgggagttctgaaaatgttggctctctctc	4	ptc-MIR1446c,ptc-MIR1446e,ptc-MIR1446d,nta-MIR1446,	nta-MIR1446	cagcgttttcTGAACTCTCTCCCTCAATGGCTgctcatatatatatagccatgcttcttaattaattaaagaacagccatgagagattgagttcagaaaactctggc	nta-miR1446	TGAACTCTCTCCCTCAATGGCT	5'	Diff	gp2b	...(((((..((((.(((((.((((((((...((((((.(((...(((.(((.((((....((....))...)))).)))...)))...))).))))))...)))))))).))))).))))..)))))...	125	44.3	-51.2	0.9	2	1.5	0	2	2	9	2.05949	1.29153	0	2.59408	1.98978	7.09447	low
182	145	csn-miR1515_2ss16AG19AG	TCATTTTTGCGTGCAGTGGTCC	22	Sc0000021	+	89687	89823	aatagggtttgtgccgtttatcgcgagctaccaagagagagggagatgaattcgtccgtatcaatcaatagctatggcagtggcatcacacttccaagtatctaatttgtaTCATTTTTGCGTGCAGTGATCCtctg	1	csi-MIR1515,	csi-MIR1515	tcgatttgcaTCATTTTTGCGTGCAATGATCCcgaatttgctctcttactcaactttctttttaatttacaaatattcatgtttattggtttgaaaaataggaaaaaaaaattctaatttttgttaacggggatctggatcattcacgcaaaaatgatttgactcgtgagttggc	csi-miR1515	TCATTTTTGCGTGCAATGATCC	3'	Diff	gp2b	.....((((((((........))))))))........(((((..((((....)))).......((((...(((.(((.((((......)))).))))))........(((((((....)).))))).))))))))).	19	43.8	-30.9	0.5	1023.5	603.5	419	1024	969	2474	1053.95	519.625	449.629	1328.17	964.047	1950.19	high
183	145	csn-miR1515_2ss16AG19AG	TCATTTTTGCGTGCAGTGGTCC	22	Sc0001185	+	470394	470462	ctatgcatgtgctattggcgtcgcaattcccaccatctaatttgttTCATTTTTGCGTGCAGTGATCCc	1	csi-MIR1515,	csi-MIR1515	tcgatttgcaTCATTTTTGCGTGCAATGATCCcgaatttgctctcttactcaactttctttttaatttacaaatattcatgtttattggtttgaaaaataggaaaaaaaaattctaatttttgttaacggggatctggatcattcacgcaaaaatgatttgactcgtgagttggc	csi-miR1515	TCATTTTTGCGTGCAATGATCC	3'	Diff	gp2b	...(((((((((.....))...((((...............)))).........)))))))........	58	44.9	-9.4	0.3	1023.5	603.5	419	1024	969	2474	1053.95	519.625	449.629	1328.17	964.047	1950.19	high
184	146	csn-miR1520j-p5_2ss7AC20AC	TGCATTCTTATTTTCACTACC	21	Sc0001915	-	258513	258653	TGCATTCTCATTTTCACTACCtaaaacattaccttggcttttacactcctctctctctctctctctctcaaacctcatagagcattccaacctcaacacgctgcaatagcggcacccccatagcaggcagtgctgacctac	1	gma-MIR1520j,	gma-MIR1520j	gaatgttgactgtcacatgtcacgttcttattgaatgatgattgtcacgtaccatgttatgattggatatcaactccatgaaagatgaaatgcattattattttcactaaccaatcataacataacacgtgatcgtcatcatccaatAAGAACGTGACACATGACAATCAAcattc	gma-MIR1520j-p5	tgcattattattttcactaac	5'	New	gp2b	.......(((....((((.(((..............(((((.....................................)))))................(((((....)))))...........))).)))).))).....	129	47.5	-16.974	0.3	7	8	3	0	6	7	7.20823	6.88815	3.2193	0	5.96933	5.51792	low
185	147	csn-miR1877-p5_2ss13GC20AC	CTCTCATTGCTTCCATGTCCT	21	Sc0001670	+	57511	57584	agtccctctatctcagCTCTCATTGCTTCCATGTCCTtgtcacgtgctcgtgatgcagctattgtagagggttg	1	osa-MIR1877,	osa-MIR1877	attctaaactctcgaggggacattctctcattgcttgcatgtcatccaaatgtttatgaaaaaattaaaaaaaatcaactggatagattaatatgtgatagataacttcataaacatgcaagttaaaattaaacttctacaagttgcaaaaaactacaactaatctatcacatattaatctattttattatttttttaaaaaaaatataaccatttAGATGACATGTGAATGATGAGGGGatgtcctctagagcttagaat	osa-MIR1877-p5	ctctcattgcttgcatgtcat	5'	New	gp2b	...((((((((...((((..(((..(...(((((.......)))))...)..))).))))...))))))))...	68	50	-24.2	0.7	2	0	1.5	4	5.5	8	2.05949	0	1.60965	5.18816	5.47189	6.30619	low
186	147	csn-miR1877-p5_2ss13GC20AC	CTCTCATTGCTTCCATGTCCT	21	xfSc0000210	-	80668	80700	CTCTCATTGCTTCCATGTCCTtatcacatgctt	1	osa-MIR1877,	osa-MIR1877	attctaaactctcgaggggacattctctcattgcttgcatgtcatccaaatgtttatgaaaaaattaaaaaaaatcaactggatagattaatatgtgatagataacttcataaacatgcaagttaaaattaaacttctacaagttgcaaaaaactacaactaatctatcacatattaatctattttattatttttttaaaaaaaatataaccatttAGATGACATGTGAATGATGAGGGGatgtcctctagagcttagaat	osa-MIR1877-p5	ctctcattgcttgcatgtcat	5'	New	gp2b	.............(((((.......)))))...	17	42.4	-2.4	0.2	2	0	1.5	4	5.5	8	2.05949	0	1.60965	5.18816	5.47189	6.30619	low
187	148	csn-miR2111a-5p_R-1_1ss20TC	TAATCTGCATCCTGAGGTTC	20	Sc0002147	+	203288	203346	TAATCTGCATCCTGAGGTTCcgtacctgatgtaccatcatcactaccatcacaggaaga	44	mtr-MIR2111d,mtr-MIR2111e,mtr-MIR2111a,mtr-MIR2111n,mtr-MIR2111o,mtr-MIR2111j,mtr-MIR2111k,mtr-MIR2111f,mtr-MIR2111b,mtr-MIR2111i,mtr-MIR2111c,mtr-MIR2111h,mtr-MIR2111m,mtr-MIR2111g,gma-MIR2111a,gma-MIR2111b,gma-MIR2111e,gma-MIR2111d,gma-MIR2111c,gma-MIR2111f,ptc-MIR2111a,ptc-MIR2111b,ath-MIR2111b,ath-MIR2111a,mdm-MIR2111b,mdm-MIR2111a,aly-MIR2111b,aly-MIR2111a,aly-MIR2111c,ppe-MIR2111c,ppe-MIR21…	mtr-MIR2111g	atattgggtgaggatgggaTAATCTGCATCCTGAGGTTTAagacaatatttgcgtaatttccaaaaaataaataaattgcgtaatcgtttctaAGCCTCGGAGTGCGGATTATCttttcctatcaccaatgc	mtr-miR2111a-5p	TAATCTGCATCCTGAGGTTTA	5'	Diff	gp2b	.........(((((.(((...(((..(((((......))))).))).))).)))))...	47	45.8	-12.6	0.5	0	0	0	0	2	0	0	0	0	0	1.98978	0	low
188	148	csn-miR2111a-5p_R-1_1ss20TC	TAATCTGCATCCTGAGGTTC	20	Sc0003453	-	69657	69762	aacagTAATCTGCATCCTGAGGTTCtacaccagatgaaacatcatcactggtggaaagtccgagccacttctggcttaatccgctacttgtctcgcagattctcat	44	mtr-MIR2111j,mtr-MIR2111k,mtr-MIR2111d,mtr-MIR2111f,mtr-MIR2111e,mtr-MIR2111a,mtr-MIR2111b,mtr-MIR2111i,mtr-MIR2111c,mtr-MIR2111n,mtr-MIR2111h,mtr-MIR2111o,mtr-MIR2111m,mtr-MIR2111g,gma-MIR2111b,gma-MIR2111e,gma-MIR2111d,gma-MIR2111c,gma-MIR2111a,gma-MIR2111f,ptc-MIR2111a,ptc-MIR2111b,ath-MIR2111b,ath-MIR2111a,mdm-MIR2111b,mdm-MIR2111a,aly-MIR2111b,aly-MIR2111a,aly-MIR2111c,ppe-MIR2111c,ppe-MIR21…	mtr-MIR2111g	atattgggtgaggatgggaTAATCTGCATCCTGAGGTTTAagacaatatttgcgtaatttccaaaaaataaataaattgcgtaatcgtttctaAGCCTCGGAGTGCGGATTATCttttcctatcaccaatgc	mtr-miR2111a-5p	TAATCTGCATCCTGAGGTTTA	5'	Diff	gp2b	...((.(((((((.......(((.....))).(((((....)))))..(((((((......((((((....))))))..)))))))........)))))))))...	100	46.2	-29.6	0.6	0	0	0	0	2	0	0	0	0	0	1.98978	0	low
189	149	csn-miR2118e-p3_2ss13TA19CT	GAAAAGAGAGTCAAAGAGT	19	Sc0000457	+	667180	667207	aaggactttGAAAAGAGAGTCAAAGAGT	1	osa-MIR2118e,	osa-MIR2118e	agtgagtcaggaagaggaagaaaagagagtctaagagcagcaggcatgggaacatggaggaaaaaacatatatagttttcttcccctctaaagttagaggttgaaatttgctgtgtgtttTTCCCAATGCCTCCCATGCCTAcagttcttaggcactccttccacttcctgttggct	osa-MIR2118e-p3	gaaaagagagtctaagagc	3'	New	gp2b	...((((((......)))))).......	18	35.7	-5.6	0.6	0	2.5	0	0	0	2.5	0	2.15255	0	0	0	1.97069	low
190	149	csn-miR2118e-p3_2ss13TA19CT	GAAAAGAGAGTCAAAGAGT	19	Sc0000474	+	361815	361842	aaggactttGAAAAGAGAGTCAAAGAGT	1	osa-MIR2118e,	osa-MIR2118e	agtgagtcaggaagaggaagaaaagagagtctaagagcagcaggcatgggaacatggaggaaaaaacatatatagttttcttcccctctaaagttagaggttgaaatttgctgtgtgtttTTCCCAATGCCTCCCATGCCTAcagttcttaggcactccttccacttcctgttggct	osa-MIR2118e-p3	gaaaagagagtctaagagc	3'	New	gp2b	...((((((......)))))).......	18	35.7	-5.6	0.6	0	2.5	0	0	0	2.5	0	2.15255	0	0	0	1.97069	low
191	150	csn-miR2118e-p5_2ss8GC17GT	TCCCAATCCCTCCCATTCCT	20	Sc0002104	-	186273	186412	TCCCAATCCCTCCCATTACTcccaccaacttcggcgacctcccccgcctctaccctcatttgtttgcaactcttgccacctccacctctctttagtgttgactgccaccccaacccttttgtagcccctctttccacttc	2	osa-MIR2118e,osa-MIR2118r,	osa-MIR2118e	agtgagtcaggaagaggaagaaaagagagtctaagagcagcaggcatgggaacatggaggaaaaaacatatatagttttcttcccctctaaagttagaggttgaaatttgctgtgtgtttTTCCCAATGCCTCCCATGCCTAcagttcttaggcactccttccacttcctgttggct	osa-MIR2118e-p5	TCCCAATGCCTCCCATGCCT	5'	New	gp2b	................................((((........)))).((((............((((...)))).................((.((((..........)))).))...))))................	1	55	-11.4	0.1	12	11.5	13.5	14	19	38	12.357	9.90171	14.4869	18.1585	18.9029	29.9544	middle
192	151	csn-miR2586a-p5_1ss13AG	CGGACACGACACGGACACGCC	21	Sc0000109	+	516371	516397	CGGACACGACACGGACACGCCGACACG	1	mtr-MIR2586a,	mtr-MIR2586a	atgacaacctatgaagcacggatacggacacggacaccggacacgacacagacacgccgacacaactaataatttgaaaatatcacattatctggtgtaattacaagtgtcggtgtcatgtcggtatcggacacgacacgtgtccgacactgggacacgcctaatcCGAGGAGTGTCCGTGCTTCATagatgacaa	mtr-MIR2586a-p5	cggacacgacacagacacgcc	5'	New	gp2b	((....))...(((.....))).....	11	70.4	-2.8	0.1	0	0	0	3	6.5	8	0	0	0	3.89112	6.46677	6.30619	low
192	152	csn-miR2586a-p3_2ss10AG24AG	ACACGACACGGACACGCCGACACG	24	Sc0000109	+	516371	516397	CGGACACGACACGGACACGCCGACACG	1	mtr-MIR2586a,	mtr-MIR2586a	atgacaacctatgaagcacggatacggacacggacaccggacacgacacagacacgccgacacaactaataatttgaaaatatcacattatctggtgtaattacaagtgtcggtgtcatgtcggtatcggacacgacacgtgtccgacactgggacacgcctaatcCGAGGAGTGTCCGTGCTTCATagatgacaa	mtr-MIR2586a-p3	acacgacacagacacgccgacaca	3'	New	gp2b	((....))...(((.....))).....	11	70.4	-2.8	0.1	3	0	0	0	0	0	3.08924	0	0	0	0	0	low
193	153	csn-miR2586b-p3_2ss6AC19GC	TGGACCCGACACGTGTCCCAC	21	Sc0000873	+	205005	205027	gaTGGACCCGACACGTGTCCCAC	1	mtr-MIR2586b,	mtr-MIR2586b	ttatatgtgaCGGTGTCGTATCGGTGTTGGACacgacacgtgtccgacactgggacacatgtcgtgtctgacac	mtr-MIR2586b-p3	TGGACacgacacgtgtccgac	3'	New	gp2b	...((((.((...)).))))...	17	65.2	-4.9	0.3	2	3	0	4	10	9	2.05949	2.58306	0	5.18816	9.94888	7.09447	low
194	153	csn-miR2586b-p3_2ss6AC19GC	TGGACCCGACACGTGTCCCAC	21	Sc0001420	+	477808	477884	ggcgttgggatcctctagagtgatcctcctaaagtgatctcctagagtgaatgagaTGGACCCGACACGTGTCCCAC	1	mtr-MIR2586b,	mtr-MIR2586b	ttatatgtgaCGGTGTCGTATCGGTGTTGGACacgacacgtgtccgacactgggacacatgtcgtgtctgacac	mtr-MIR2586b-p3	TGGACacgacacgtgtccgac	3'	New	gp2b	...((((((.((((((((...((((((.....)).))))..)))))...........)))))))))...........	63	53.2	-20.2	0.5	2	3	0	4	10	9	2.05949	2.58306	0	5.18816	9.94888	7.09447	low
195	154	csn-miR2586a-p3_1ss13AG	CGGACACGACACGGACACGCC	21	xfSc0015501	+	727	767	aaatctatgaagcacggacaCGGACACGACACGGACACGCC	1	mtr-MIR2586a,	mtr-MIR2586a	atgacaacctatgaagcacggatacggacacggacaccggacacgacacagacacgccgacacaactaataatttgaaaatatcacattatctggtgtaattacaagtgtcggtgtcatgtcggtatcggacacgacacgtgtccgacactgggacacgcctaatcCGAGGAGTGTCCGTGCTTCATagatgacaa	mtr-MIR2586a-p3	cggacacgacacagacacgcc	3'	New	gp2b	...((..((.....((....)).......))..))......	32	56.1	-2.1	0.1	0	0	0	3	6.5	8	0	0	0	3.89112	6.46677	6.30619	low
196	155	csn-miR2592bj-p3_2ss12TC19AT_2	ATTCCCACTGTCCCTGTCTA	20	Sc0000007	+	1600571	1600697	aagcgcgggtaaacggcgggagtaactatgactctcttaaggtagccaaatgcctcgtcatctaattagtgacgcgcatgaatggattaacgagATTCCCACTGTCCCTGTCTActatccagcgaaa	2	mtr-MIR2592bj,mtr-MIR2592bi,	mtr-MIR2592bj	ccaatatttgaccggaattcccactgttcctgtcaaaagattaaattcttgttaggctgatttaaatgaaggtattgaagtgtcaaggaatggacctcattcttttcacatttgaataccatcatttaatcccaacctaacaagaatttaatcttttgaaTGGAACATTGGGAATGCCGGTcgaatattgg	mtr-MIR2592bj-p3	attcccactgttcctgtcaa	3'	New	gp2b	...((((((((...((((((..((.....((.((((((((..((.....((((..((((((.......)))))).))))...))..)))).)))).))....))..))))))...))))).)))...	121	48	-35.2	0.6	6.5	6.5	6	5.5	4.5	4.5	6.69336	5.59662	6.4386	7.13372	4.477	3.54723	low
197	155	csn-miR2592bj-p3_2ss12TC19AT_2	ATTCCCACTGTCCCTGTCTA	20	Sc0000492	+	387611	387737	caagcgtgggtaaacggcgggagtaactatgactctcttaaggtagccaaatgcctcgtcatctaattagtgacgcgcatgaatggattaacgagATTCCCACTGTCCCTGTCTActatccagcgaa	2	mtr-MIR2592bj,mtr-MIR2592bi,	mtr-MIR2592bj	ccaatatttgaccggaattcccactgttcctgtcaaaagattaaattcttgttaggctgatttaaatgaaggtattgaagtgtcaaggaatggacctcattcttttcacatttgaataccatcatttaatcccaacctaacaagaatttaatcttttgaaTGGAACATTGGGAATGCCGGTcgaatattgg	mtr-MIR2592bj-p3	attcccactgttcctgtcaa	3'	New	gp2b	...((.((((((...((((((..((.....((.((((((((..((.....((((..((((((.......)))))).))))...))..)))).)))).))....))..))))))...))))))))...	121	48	-35	0.6	6.5	6.5	6	5.5	4.5	4.5	6.69336	5.59662	6.4386	7.13372	4.477	3.54723	low
198	156	csn-miR2592bj-p3_2ss12TC19AT_1	ATTCCCACTGTCCCTGTCT	19	Sc0000007	+	1709644	1709762	accaggcacgggtaaacggcgggagtaactatgactctcttgaggtagccaaatgcctcgtcatctaattagtgacgcacatgaatggactaacgagATTCCCACTGTCCCTGTCTacc	2	mtr-MIR2592bj,mtr-MIR2592bi,	mtr-MIR2592bj	ccaatatttgaccggaattcccactgttcctgtcaaaagattaaattcttgttaggctgatttaaatgaaggtattgaagtgtcaaggaatggacctcattcttttcacatttgaataccatcatttaatcccaacctaacaagaatttaatcttttgaaTGGAACATTGGGAATGCCGGTcgaatattgg	mtr-MIR2592bj-p3	attcccactgttcctgtca	3'	New	gp2b	...(((((.(((...((((.((((((........(((....))).((((((.(((...((((((.......))))))..)))...))).))).....)))))).))))))))))))...	113	50.4	-35.6	0.6	6.5	6.5	6	5.5	4.5	4.5	6.69336	5.59662	6.4386	7.13372	4.477	3.54723	low
199	156	csn-miR2592bj-p3_2ss12TC19AT_1	ATTCCCACTGTCCCTGTCT	19	Sc0003350	+	103817	103929	agcgcaggtaaacggtgggagtaactatgactctcttaaagtagccaaatgcctcgtcatctaattagtgacgcgcatgaatggattaacgagATTCCCACTGTCCCTGTCTa	2	mtr-MIR2592bj,mtr-MIR2592bi,	mtr-MIR2592bj	ccaatatttgaccggaattcccactgttcctgtcaaaagattaaattcttgttaggctgatttaaatgaaggtattgaagtgtcaaggaatggacctcattcttttcacatttgaataccatcatttaatcccaacctaacaagaatttaatcttttgaaTGGAACATTGGGAATGCCGGTcgaatattgg	mtr-MIR2592bj-p3	attcccactgttcctgtca	3'	New	gp2b	...(((((...(((((((((((.(((.(((.....))).)))..(((.((((..((((((.......)))))).))))...))).........))))))))))).)))))...	107	46	-35.2	0.7	6.5	6.5	6	5.5	4.5	4.5	6.69336	5.59662	6.4386	7.13372	4.477	3.54723	low
200	157	csn-miR2592ay-p3_2ss6AG17CG_2	GAGTCGGGTTGTTTGGGAA	19	Sc0000324	+	387289	387339	cggaccccatcgcaccacggggcactgtccgcGAGTCGGGTTGTTTGGGAA	1	mtr-MIR2592ay,	mtr-MIR2592ay	atcaaaagcttgattccgccagaagatcgtcattagttagggtaaggtgcattccaactgcaacaattgtcttacctctgaaatggggtaattcaaacttgccaaacggccaggactcaagcatttcgCTCGGCATTCATGTTTTTCCTTtgaaaagattaaattcttgttAGGCTGGTTTAGATGAAGGTAttaagtgtcaaggaatgaacctcatttcgttggcacttgaataccatcatctaaagcacacctaacaaaaatttattcttttcaaaggaaaacatgaatgccgggtgaaatgcttgagtcaggttgtttggcaagtttgaatttaccccattcaaaggtaagacaattgttgtagttggaatgcacattccaactgcaacaattatc…	mtr-MIR2592ay-p3	gagtcaggttgtttggcaa	3'	New	gp2b	..(((((..((((...((((....))))..))))...))))).........	40	66.7	-16.2	0.5	2.5	2.5	7.5	5.5	10	3.5	2.57437	2.15255	8.04825	7.13372	9.94888	2.75896	low
201	158	csn-miR2592bj-p3_2ss10TC17AT	TCCCACTGTCCCTGTCTA	18	Sc0000325	+	74028	74132	taaacagtgggagtaactatgactctcttaaggtagccaattgcctcgttatctaattagtgacgcgcatgaatggattagcgtgatTCCCACTGTCCCTGTCTA	2	mtr-MIR2592bj,mtr-MIR2592bi,	mtr-MIR2592bj	ccaatatttgaccggaattcccactgttcctgtcaaaagattaaattcttgttaggctgatttaaatgaaggtattgaagtgtcaaggaatggacctcattcttttcacatttgaataccatcatttaatcccaacctaacaagaatttaatcttttgaaTGGAACATTGGGAATGCCGGTcgaatattgg	mtr-MIR2592bj-p3	tcccactgttcctgtcaa	3'	New	gp2b	...(((((((((((................((((((....))))))(((((((((.((((((...))).))).)))).)))))..))))))))))).........	93	43.8	-29	0.6	0	0	3	1.5	0	1.5	0	0	3.2193	1.94556	0	1.18241	low
202	158	csn-miR2592bj-p3_2ss10TC17AT	TCCCACTGTCCCTGTCTA	18	xpSc0053216	+	651343	651453	cgcgggtaaacggcgggagtaactatgactctcttaaggtagccaaatgcctcgtcatctaattagtgacgcgcatgaatggattaacgagatTCCCACTGTCCCTGTCTA	2	mtr-MIR2592bj,mtr-MIR2592bi,	mtr-MIR2592bj	ccaatatttgaccggaattcccactgttcctgtcaaaagattaaattcttgttaggctgatttaaatgaaggtattgaagtgtcaaggaatggacctcattcttttcacatttgaataccatcatttaatcccaacctaacaagaatttaatcttttgaaTGGAACATTGGGAATGCCGGTcgaatattgg	mtr-MIR2592bj-p3	tcccactgttcctgtcaa	3'	New	gp2b	.(((((...((((.(((((..........((((((((..((.....((((..((((((.......)))))).))))...))..)))).))))))))).)))).)))))...	107	48.6	-31	0.6	0	0	3	1.5	0	1.5	0	0	3.2193	1.94556	0	1.18241	low
203	159	csn-miR2592bj-p3_1ss12TC	ATTCCCACTGTCCCTGTC	18	Sc0002047	+	369016	369142	aagcgcgggtaaacggcgggagtaactatgactctcttaaggtagccaaatgcctcgtcatctaattagtgacgcgcatgaatggattaacgagATTCCCACTGTCCCTGTCtactatccagcgaaa	2	mtr-MIR2592bj,mtr-MIR2592bi,	mtr-MIR2592bj	ccaatatttgaccggaattcccactgttcctgtcaaaagattaaattcttgttaggctgatttaaatgaaggtattgaagtgtcaaggaatggacctcattcttttcacatttgaataccatcatttaatcccaacctaacaagaatttaatcttttgaaTGGAACATTGGGAATGCCGGTcgaatattgg	mtr-MIR2592bj-p3	attcccactgttcctgtc	3'	New	gp2b	...((((((((...((((((..((.....((.((((((((..((.....((((..((((((.......)))))).))))...))..)))).)))).))....))..))))))...))))).)))...	121	48	-35.2	0.6	0	2	0	4	3	6.5	0	1.72204	0	5.18816	2.98467	5.12378	low
204	159	csn-miR2592bj-p3_1ss12TC	ATTCCCACTGTCCCTGTC	18	xfSc0000009	+	516844	516970	caagcgtgggtaaacgacgggagtaactatgactctcttaaggtagccaaatgcctcgtcatctaattagtgacgcgcatgaatggattaacgagATTCCCACTGTCCCTGTCtactatccagcgaa	2	mtr-MIR2592bj,mtr-MIR2592bi,	mtr-MIR2592bj	ccaatatttgaccggaattcccactgttcctgtcaaaagattaaattcttgttaggctgatttaaatgaaggtattgaagtgtcaaggaatggacctcattcttttcacatttgaataccatcatttaatcccaacctaacaagaatttaatcttttgaaTGGAACATTGGGAATGCCGGTcgaatattgg	mtr-MIR2592bj-p3	attcccactgttcctgtc	3'	New	gp2b	...((.((((((...((((((..((.....((.((((((((..((.....((((..((((((.......)))))).))))...))..)))).)))).))....))..))))))...))))))))...	121	47.2	-35.6	0.6	0	2	0	4	3	6.5	0	1.72204	0	5.18816	2.98467	5.12378	low
205	160	csn-miR2592ay-p5_2ss6AG17CG_1	GAGTCGGGTTGTTTGGGA	18	Sc0004507	+	73450	73479	GAGTCGGGTTGTTTGGGAatgcagccctaa	1	mtr-MIR2592ay,	mtr-MIR2592ay	atcaaaagcttgattccgccagaagatcgtcattagttagggtaaggtgcattccaactgcaacaattgtcttacctctgaaatggggtaattcaaacttgccaaacggccaggactcaagcatttcgCTCGGCATTCATGTTTTTCCTTtgaaaagattaaattcttgttAGGCTGGTTTAGATGAAGGTAttaagtgtcaaggaatgaacctcatttcgttggcacttgaataccatcatctaaagcacacctaacaaaaatttattcttttcaaaggaaaacatgaatgccgggtgaaatgcttgagtcaggttgtttggcaagtttgaatttaccccattcaaaggtaagacaattgttgtagttggaatgcacattccaactgcaacaattatc…	mtr-MIR2592ay-p5	gagtcaggttgtttggca	5'	New	gp2b	.....(((((((........)))))))...	22	53.3	-10.9	0.7	2.5	2.5	7.5	5.5	10	3.5	2.57437	2.15255	8.04825	7.13372	9.94888	2.75896	low
206	161	csn-miR2592ay-p3_2ss6AG17CG_1	GAGTCGGGTTGTTTGGGA	18	xfSc0000009	+	527586	527627	gtcgcagcacgaggcgctatctgcGAGTCGGGTTGTTTGGGA	1	mtr-MIR2592ay,	mtr-MIR2592ay	atcaaaagcttgattccgccagaagatcgtcattagttagggtaaggtgcattccaactgcaacaattgtcttacctctgaaatggggtaattcaaacttgccaaacggccaggactcaagcatttcgCTCGGCATTCATGTTTTTCCTTtgaaaagattaaattcttgttAGGCTGGTTTAGATGAAGGTAttaagtgtcaaggaatgaacctcatttcgttggcacttgaataccatcatctaaagcacacctaacaaaaatttattcttttcaaaggaaaacatgaatgccgggtgaaatgcttgagtcaggttgtttggcaagtttgaatttaccccattcaaaggtaagacaattgttgtagttggaatgcacattccaactgcaacaattatc…	mtr-MIR2592ay-p3	gagtcaggttgtttggca	3'	New	gp2b	...(((((.(((..(((.....)))..))).)))))......	33	61.9	-14.4	0.6	2.5	2.5	7.5	5.5	10	3.5	2.57437	2.15255	8.04825	7.13372	9.94888	2.75896	low
207	162	csn-miR2592ay-p5_2ss6AG17CG_2	GAGTCGGGTTGTTTGGGAA	19	xfSc0000121	+	325762	325813	gcactgtctgcGAGTCGGGTTGTTTGGGAAtgcaaccctaatcaggcggaaa	1	mtr-MIR2592ay,	mtr-MIR2592ay	atcaaaagcttgattccgccagaagatcgtcattagttagggtaaggtgcattccaactgcaacaattgtcttacctctgaaatggggtaattcaaacttgccaaacggccaggactcaagcatttcgCTCGGCATTCATGTTTTTCCTTtgaaaagattaaattcttgttAGGCTGGTTTAGATGAAGGTAttaagtgtcaaggaatgaacctcatttcgttggcacttgaataccatcatctaaagcacacctaacaaaaatttattcttttcaaaggaaaacatgaatgccgggtgaaatgcttgagtcaggttgtttggcaagtttgaatttaccccattcaaaggtaagacaattgttgtagttggaatgcacattccaactgcaacaattatc…	mtr-MIR2592ay-p5	gagtcaggttgtttggcaa	5'	New	gp2b	...(((((((......(((((((........)))))))....)))))))...	46	53.8	-18.8	0.7	2.5	2.5	7.5	5.5	10	3.5	2.57437	2.15255	8.04825	7.13372	9.94888	2.75896	low
208	163	csn-miR2603-p3_2ss9AC17AC	GTCCCTGCCCTTTGTACA	18	Sc0000474	+	286253	286350	gatggggatagatcattgcaattgttagttttcaatgaggaattcctagtaagcgcgagttatcagctcgcgtggactacGTCCCTGCCCTTTGTACA	1	mtr-MIR2603,	mtr-MIR2603	ttggtccctgcacttttttgTTTGGTATTGGTCCCTGCACTTtgtaaaaatattggtattggttcctctgttaactttctgttaaaaaaaaaacacaaaaccaacggagtgcggcccaatcatttcacgcccacgtggcaccaatatcaatatttttacaaattgcagggacaaataccaatattttacaaagtgcagggcccaataccaatagttttgggttttttttttacagaaagttaatagagggaccaataccaatatttttacaaagtgcaaggaccaattccaaacaaaaaaaagtgtagggaccaat	mtr-MIR2603-p3	GTCCCTGCACTTtgtaaa	3'	New	gp2b	...((((((...((((((.((........)).))))))........((((..((((((((.....))))))))..)))).))))))............	83	45.9	-30.4	0.7	2	2	2.5	0	3.5	0	2.05949	1.72204	2.68275	0	3.48211	0	low
209	164	csn-miR2603-p5_2ss9AC17AC	GTCCCTGCCCTTTGTACA	18	xpSc0053318	+	247271	247389	agtgcgagtcattagttcgcgttgactacGTCCCTGCCCTTTGTACAcaccacccattgctcctaccgattgaatggtgaagtgtttggatcgtggcgacgtgggcggttcactgccag	1	mtr-MIR2603,	mtr-MIR2603	ttggtccctgcacttttttgTTTGGTATTGGTCCCTGCACTTtgtaaaaatattggtattggttcctctgttaactttctgttaaaaaaaaaacacaaaaccaacggagtgcggcccaatcatttcacgcccacgtggcaccaatatcaatatttttacaaattgcagggacaaataccaatattttacaaagtgcagggcccaataccaatagttttgggttttttttttacagaaagttaatagagggaccaataccaatatttttacaaagtgcaaggaccaattccaaacaaaaaaaagtgtagggaccaat	mtr-MIR2603-p5	GTCCCTGCACTTtgtaaa	5'	New	gp2b	...((.(((.....(..(((((((.((((((((..((.(((......(((((..(((((.......))).))..)))))))).))..))).))))))))))))..).....)))))...	113	54.6	-35.7	0.5	2	2	2.5	0	3.5	0	2.05949	1.72204	2.68275	0	3.48211	0	low
210	165	csn-miR2629g-p3_2ss13TC18GA	CTGCCGAAGTTTCCCTCA	18	xpSc0053208	-	20750	20822	gtcaaatttgggcataggggcgaaagactaatcgaactatctagtagctggttcCTGCCGAAGTTTCCCTCAg	3	mtr-MIR2629g,mtr-MIR2629d,mtr-MIR2629f,	mtr-MIR2629g	aattatggaatcagctacagttaattatcaaagaaaacttcgacagttaattgccgcggagttttaaaattaaaatttaacacctcatgctctttattaaatgcatacgttatatcatttaataaagagtatgtggtgtttgatttaatttaatttgatattaacataaataaatggcagatatgtgcatgtgtgttaaattttaattttgaaactccgcggcagtaactgccgaAGTTTTCCTCGGTAGTTAACTgcaaaagtttcctcgata	mtr-MIR2629g-p3	ctgccgaAGTTTTCCTCG	3'	New	gp2b	...((((((.((((..((..(.....((((...........)))).....)..)))))).)))))).......	63	47.9	-16.5	0.5	0	0	0	3	3	5	0	0	0	3.89112	2.98467	3.94137	low
211	166	csn-miR2680a-p5_2ss14TC20GC	TTTAACCCCTTCCCCTAGACTA	22	Sc0000518	+	277664	277805	TTCAACCCCTTCCCCTAGACTAtctatcagtttcaccaatgctaaatctcactctctatttaccgaaaccaatttggctggccaaaattcttatttatgcaaagttaaattcaaccccttcccctagactatctatcagttt	8	mtr-MIR2680a,mtr-MIR2680a,mtr-MIR2680c,mtr-MIR2680c,mtr-MIR2680d,mtr-MIR2680e,mtr-MIR2680d,mtr-MIR2680e,	mtr-MIR2680a	atagggtctagacctggcatatcttcataggaccatgcaaaaatatccggatattcccggaggagttggatgatcttctgtttaaccccttcctctagagtagcaccaatcttgatttctcgcttgtttTCCTCGGTACCTATGTTGATaagctcaatctcttcctgg	mtr-MIR2680a-p5	tttaaccccttcctctagagta	5'	New	gp2b	...............((((...((((.........(((..(((((((.....((..........)).....))))))))))...........(((((........)))))..............))))...)))).......	120	38	-9.9	0.2	3	5	4	0	0	5	3.08924	4.30509	4.2924	0	0	3.94137	low
212	167	csn-miR3630-3p_L-3_1ss22CT	GGGAATCTCTCTGATGCAT	19	Sc0002498	-	223420	223465	aatgaatatcacccgttGGGAATCTCTCTAATGCATtttatttgaa	2	vvi-MIR3630,han-MIR3630,	vvi-MIR3630	cagtatggttgTGCAAGTGACGATATCAGACAgggacatcagcacctccaatggagaatgatgatttgtcTTTGGGAATCTCTCTGATGCACaagcatattg	vvi-miR3630-3p	TTTGGGAATCTCTCTGATGCAC	3'	Diff	gp2b	...(((((.....(((((((......))))))).....)))))...	40	32.6	-8	0.5	3.5	3.5	3.5	10.5	12.5	20.5	3.60411	3.01356	3.75585	13.6189	12.4361	16.1596	middle
213	167	csn-miR3630-3p_L-3_1ss22CT	GGGAATCTCTCTGATGCAT	19	Sc0003018	-	68425	68487	ttccctcctccgatgaatatcacccgttGGGAATCTCTCTAATGCATtttatttgaaaggcca	2	vvi-MIR3630,han-MIR3630,	vvi-MIR3630	cagtatggttgTGCAAGTGACGATATCAGACAgggacatcagcacctccaatggagaatgatgatttgtcTTTGGGAATCTCTCTGATGCACaagcatattg	vvi-miR3630-3p	TTTGGGAATCTCTCTGATGCAC	3'	Diff	gp2b	...(((..((..(((((.......(((((((......)))))))...)))))..)).)))...	57	42.9	-10.4	0.4	3.5	3.5	3.5	10.5	12.5	20.5	3.60411	3.01356	3.75585	13.6189	12.4361	16.1596	middle
214	168	csn-miR3630-3p_L-2_1ss22CT	TGGGAATCTCTCTGATGCAT	20	Sc0002498	-	226934	226996	ttccctcctccgatgaatatcacccgtTGGGAATCTCTCTAATGCATtttatttgaaaggcca	2	vvi-MIR3630,han-MIR3630,	vvi-MIR3630	cagtatggttgTGCAAGTGACGATATCAGACAgggacatcagcacctccaatggagaatgatgatttgtcTTTGGGAATCTCTCTGATGCACaagcatattg	vvi-miR3630-3p	TTTGGGAATCTCTCTGATGCAC	3'	Diff	gp2b	...(((..((..(((((.......(((((((......)))))))...)))))..)).)))...	57	42.9	-10.4	0.4	3	2	0	11	6.5	7.5	3.08924	1.72204	0	14.2674	6.46677	5.91206	middle
215	169	csn-miR3630-3p_L-2_1ss14CT	TGGGAATCTCTTTGATGCAC	20	Sc0004221	-	31929	31959	TGGGAATCTCGTTGATGCACcaccgagaatg	1	vvi-MIR3630,	vvi-MIR3630	cagtatggttgTGCAAGTGACGATATCAGACAgggacatcagcacctccaatggagaatgatgatttgtcTTTGGGAATCTCTCTGATGCACaagcatattg	vvi-miR3630-3p	TTTGGGAATCTCTCTGATGCAC	5'	Diff	gp2b	......(((((.((......)).)))))...	22	51.6	-6.7	0.4	1.5	0	0	0	5	5.5	1.54462	0	0	0	4.97444	4.33551	low
216	170	csn-miR3630-3p_L-1_1ss14CT	TTGGGAATCTCTTTGATGCAC	21	Sc0005333	-	47095	47207	ttggacaacagtttgtgcaagtgatgataaaatagacagggacatcagcactcccatgtcggagtatgatgatttgtctTTGGGAATCTCTTTGATGCACaaactttgtcaca	1	vvi-MIR3630,	vvi-MIR3630	cagtatggttgTGCAAGTGACGATATCAGACAgggacatcagcacctccaatggagaatgatgatttgtcTTTGGGAATCTCTCTGATGCACaagcatattg	vvi-miR3630-3p	TTTGGGAATCTCTCTGATGCAC	3'	Diff	gp2b	...(((((.((((((((((((.(((........((((((...(((((..(((((......))))).)))))..))))))......))).))....)))))))))))))))...	107	40.7	-39.7	0.9	22	6.5	4.5	8.5	18	36.5	22.6544	5.59662	4.82895	11.0248	17.908	28.772	middle
217	170	csn-miR3630-3p_L-1_1ss14CT	TTGGGAATCTCTTTGATGCAC	21	Sc0006020	-	27644	27690	atcagaatctcaatgatgatttgtctTTGGGAATCTCTATGATGCAC	1	vvi-MIR3630,	vvi-MIR3630	cagtatggttgTGCAAGTGACGATATCAGACAgggacatcagcacctccaatggagaatgatgatttgtcTTTGGGAATCTCTCTGATGCACaagcatattg	vvi-miR3630-3p	TTTGGGAATCTCTCTGATGCAC	3'	Diff	gp2b	...(((.((((((.(((.....))).)))))).)))...........	33	36.2	-9.7	0.6	22	6.5	4.5	8.5	18	36.5	22.6544	5.59662	4.82895	11.0248	17.908	28.772	middle
218	171	csn-miR3630-3p_L-1_1ss22CT	TTGGGAATCTCTCTGATGCAT	21	Sc0006020	-	28145	28168	tctTTGGGAATCTCTCTGATGCAA	2	vvi-MIR3630,han-MIR3630,	vvi-MIR3630	cagtatggttgTGCAAGTGACGATATCAGACAgggacatcagcacctccaatggagaatgatgatttgtcTTTGGGAATCTCTCTGATGCACaagcatattg	vvi-miR3630-3p	TTTGGGAATCTCTCTGATGCAC	3'	Diff	gp2b	...(..((......))..).....	16	41.7	-2.6	0.3	16.5	6.5	5	32.5	11.5	43	16.9908	5.59662	5.3655	42.1538	11.4412	33.8958	middle
219	172	csn-miR3630-3p_L-3_1ss22CA	GGGAATCTCTCTGATGCAA	19	xpSc0053214	+	615911	615968	ttagcatctttccaggttttctgGGTAATCTCTCTGATGCAAttggtgtgggtgcact	1	vvi-MIR3630,	vvi-MIR3630	cagtatggttgTGCAAGTGACGATATCAGACAgggacatcagcacctccaatggagaatgatgatttgtcTTTGGGAATCTCTCTGATGCACaagcatattg	vvi-miR3630-3p	TTTGGGAATCTCTCTGATGCAC	3'	Diff	gp2b	...((((((..((((....((.(((......))).)).....))))...))))))...	52	44.8	-15.8	0.6	2.5	0	0	2	6.5	1.5	2.57437	0	0	2.59408	6.46677	1.18241	low
220	173	csn-miR4995_L+1R-4	TAGGCAGTGGCTTGGTTA	18	Sc0000449	+	64661	64748	gactcaTAGGCAGTGGCTTGGTTAagggaacccactggagccgtaacgAAAGCGAGTCTTCATAGGgcaattgtcactgcttatgtac	2	gma-MIR4995,ath-MIR406,	gma-MIR4995	taaaactcatAGGCAGTGGCTTGGTTAAGGGaagccactggagccgtagtaaaagcaagtcttcaccgggcaattgtttatggacccgaa	gma-miR4995	AGGCAGTGGCTTGGTTAAGGG	5'	Diff	gp2b	....(((((((((((((...((((..((..((....))..)).))))........((((.....))))....)))))))))))))...	81	50	-29.4	0.7	9	18	7	10	26	13.5	9.26772	15.4983	7.5117	12.9704	25.8671	10.6417	middle
220	174	csn-miR406-p3_2ss4AG18TG	AAAGCGAGTCTTCATAGG	18	Sc0000449	+	64661	64748	gactcaTAGGCAGTGGCTTGGTTAagggaacccactggagccgtaacgAAAGCGAGTCTTCATAGGgcaattgtcactgcttatgtac	2	gma-MIR4995,ath-MIR406,	ath-MIR406	taaagtcttaatttttagttatcacgatttagcacatatcaatctatagatttgatttttcttttattagttcttaaattttgatttgagacagtaactattcaaaTAGAATGCTATTGTAATCCAGaatccgaaagaaacgaatcaaaaaaaaaaaaaacgagtcttcatagtaaaaatcgattaactaaaaaggatgg	ath-MIR406-p3	aaaacgagtcttcatagt	3'	New	gp2b	....(((((((((((((...((((..((..((....))..)).))))........((((.....))))....)))))))))))))...	81	50	-29.4	0.7	0	0	2	0	0	0	0	0	2.1462	0	0	0	low
221	173	csn-miR4995_L+1R-4	TAGGCAGTGGCTTGGTTA	18	xpSc0053468	+	19069	19157	gactcaTAGGCAGTGGCTTGGTTAagggaacccactggagccatagcgAAAGCGAGTCTTCATAGGgcaattgtcaccgcttatgaaga	2	gma-MIR4995,ath-MIR406,	gma-MIR4995	taaaactcatAGGCAGTGGCTTGGTTAAGGGaagccactggagccgtagtaaaagcaagtcttcaccgggcaattgtttatggacccgaa	gma-miR4995	AGGCAGTGGCTTGGTTAAGGG	5'	Diff	gp2b	...((((((((.(((((.(((((..((.......))..)))))..((....))..((((.....))))....))))).))))))))...	83	50.6	-31.6	0.7	9	18	7	10	26	13.5	9.26772	15.4983	7.5117	12.9704	25.8671	10.6417	middle
221	174	csn-miR406-p3_2ss4AG18TG	AAAGCGAGTCTTCATAGG	18	xpSc0053468	+	19069	19157	gactcaTAGGCAGTGGCTTGGTTAagggaacccactggagccatagcgAAAGCGAGTCTTCATAGGgcaattgtcaccgcttatgaaga	2	gma-MIR4995,ath-MIR406,	ath-MIR406	taaagtcttaatttttagttatcacgatttagcacatatcaatctatagatttgatttttcttttattagttcttaaattttgatttgagacagtaactattcaaaTAGAATGCTATTGTAATCCAGaatccgaaagaaacgaatcaaaaaaaaaaaaaacgagtcttcatagtaaaaatcgattaactaaaaaggatgg	ath-MIR406-p3	aaaacgagtcttcatagt	3'	New	gp2b	...((((((((.(((((.(((((..((.......))..)))))..((....))..((((.....))))....))))).))))))))...	83	50.6	-31.6	0.7	0	0	2	0	0	0	0	0	2.1462	0	0	0	low
222	175	csn-miR5083-p5_1ss19GC	ATGGATCCTTCTGAGCCTC	19	Sc0000017	-	827934	827967	gATGGATCCTTCTGAGCTTCtgcttaacaggtcg	1	osa-MIR5083,	osa-MIR5083	tcctggcagttcttcagataatcagatttgtccatgaggtttcaactgttgcattccattgttgagttttattctgtttgcgtttctgtttgtttttgtcatggatctggctgattggaggctgtgatgaccaaaaaatacctacctattttctgagggattccagtccttctgattgatagaaaccaatggatccttctgagcctgccaagatcttcagattcttagttttgtattcggctttttcgatttgtcttcgtatattgcattcttctaaaagcaagcaagattcgtaacagttgatgggatgataacctttcacagaaactgtatgtgttgacccaaaattcAGACTACAATTATCTGATCAactcagacat	osa-MIR5083-p5	atggatccttctgagcctg	5'	New	gp2b	....((.(((..(((((....)))))..))))).	29	50	-9.5	0.6	10.5	10	8	31	34.5	56.5	10.8123	8.61018	8.5848	40.2082	34.3236	44.5375	middle
223	175	csn-miR5083-p5_1ss19GC	ATGGATCCTTCTGAGCCTC	19	Sc0000050	-	1108335	1108396	agATGGATCCTTCTGAGCTTCtgcttaacaggtcaggcctctgggtcaagagggattcggtg	1	osa-MIR5083,	osa-MIR5083	tcctggcagttcttcagataatcagatttgtccatgaggtttcaactgttgcattccattgttgagttttattctgtttgcgtttctgtttgtttttgtcatggatctggctgattggaggctgtgatgaccaaaaaatacctacctattttctgagggattccagtccttctgattgatagaaaccaatggatccttctgagcctgccaagatcttcagattcttagttttgtattcggctttttcgatttgtcttcgtatattgcattcttctaaaagcaagcaagattcgtaacagttgatgggatgataacctttcacagaaactgtatgtgttgacccaaaattcAGACTACAATTATCTGATCAactcagacat	osa-MIR5083-p5	atggatccttctgagcctg	5'	New	gp2b	...(((((((((((((((....)))).........((((....)))).)))))))))))...	56	53.2	-22	0.7	10.5	10	8	31	34.5	56.5	10.8123	8.61018	8.5848	40.2082	34.3236	44.5375	middle
224	176	csn-miR5083-p5_1ss19CA	CTACAATTATCTGATCAAA	19	Sc0000468	-	840618	840678	aatgattagCTACAATTATCTGATCAATctgatgttttagataaataatttgctaattttt	1	osa-MIR5083,	osa-MIR5083	tcctggcagttcttcagataatcagatttgtccatgaggtttcaactgttgcattccattgttgagttttattctgtttgcgtttctgtttgtttttgtcatggatctggctgattggaggctgtgatgaccaaaaaatacctacctattttctgagggattccagtccttctgattgatagaaaccaatggatccttctgagcctgccaagatcttcagattcttagttttgtattcggctttttcgatttgtcttcgtatattgcattcttctaaaagcaagcaagattcgtaacagttgatgggatgataacctttcacagaaactgtatgtgttgacccaaaattcAGACTACAATTATCTGATCAactcagacat	osa-MIR5083-p5	CTACAATTATCTGATCAac	5'	New	gp2b	...(((((((.....((((((((.((......))..)))))))).......)))))))...	55	21.3	-11.5	0.9	0	0	0	2	0	3.5	0	0	0	2.59408	0	2.75896	low
225	176	csn-miR5083-p5_1ss19CA	CTACAATTATCTGATCAAA	19	Sc0001434	-	125547	125704	ctgtggaccggtccactatcatgtaCTACAATTATCTGATCAATctttttttgtttttgtttttgtttttgttttttgtggatgatctacaaaagaccaaccgattcagaaattaaaaaaaaaagggggcctgtgacctgaactggactggtccagtg	1	osa-MIR5083,	osa-MIR5083	tcctggcagttcttcagataatcagatttgtccatgaggtttcaactgttgcattccattgttgagttttattctgtttgcgtttctgtttgtttttgtcatggatctggctgattggaggctgtgatgaccaaaaaatacctacctattttctgagggattccagtccttctgattgatagaaaccaatggatccttctgagcctgccaagatcttcagattcttagttttgtattcggctttttcgatttgtcttcgtatattgcattcttctaaaagcaagcaagattcgtaacagttgatgggatgataacctttcacagaaactgtatgtgttgacccaaaattcAGACTACAATTATCTGATCAactcagacat	osa-MIR5083-p5	CTACAATTATCTGATCAac	5'	New	gp2b	...((((((((((((...(((.((..((((....(((.......(((((((((((((((..(..(((...(((((((((((.....))))))))))).)))..)..)))))))....)))))))))))...)))))).)))..))))))))))))...	152	37.3	-46.2	0.8	0	0	0	2	0	3.5	0	0	0	2.59408	0	2.75896	low
226	177	csn-miR5267c-p3_2ss2AT17AG	CTAGTGAATAACTAAAGA	18	Sc0001189	-	111179	111303	acctcacaagcagcagctagttcaggaggtccgttgagcgcctcatggctatgtcataatagattcgaacacttgccccggatcgacttccaaatcataattgctCTAGTGAATAACTAAAGAaa	9	mtr-MIR5267c,mtr-MIR5267d,mtr-MIR5267e,mtr-MIR5267j,mtr-MIR5267l,mtr-MIR5267f,mtr-MIR5267g,mtr-MIR5267h,mtr-MIR5267o,	mtr-MIR5267c	gcaaatcctatAGGCATTTGCTAGAATACACCCACttattttttagaaggagtattttagcaagtgaataactaaaaagtg	mtr-MIR5267c-p3	caagtgaataactaaaaa	3'	New	gp2b	...((((.((.((((..((.....(((((((........(((....)))............((((((...........)))))))))))))......))..)))))).)))).............	109	44.8	-29.3	0.5	8	15.5	19	15.5	40.5	43.5	8.23798	13.3458	20.3889	20.1041	40.293	34.2899	middle
227	178	csn-miR5267j-p3_2ss2AT17AG	CTAGTGAATAACTAAAGAA	19	xpSc0055332	+	9969	9993	ttactCTAGTGAATAACTAAAGGAa	1	mtr-MIR5267j,	mtr-MIR5267j	caaatcttatAGGCATTTGCTAGAATACACCCACttattttttagaatgagtattttagcaagtgaataactaaaaaatggttca	mtr-MIR5267j-p3	caagtgaataactaaaaaa	3'	New	gp2b	...((.((((.....)))).))...	19	28	-3.4	0.5	2	1.5	4	3.5	4.5	4.5	2.05949	1.29153	4.2924	4.53964	4.477	3.54723	low
228	179	csn-miR5303j-p5_2ss10GT17CT	ATTCAAATTTCTGCCCTA	18	Sc0000324	+	384895	384969	ATTCAAATTTCTGCCCTAtcaactttcgatggtaggatagtggcctactatggtggtgacgggtgacggagaatt	1	stu-MIR5303j,	stu-MIR5303j	gctcggactattcaaattgctgccccaccctgtgtaagatcctccaaaaatgactacttttgaaggattaaacacgcatccggcAATATTTTTGAAGAGTCTGAGCAA	stu-MIR5303j-p5	attcaaattgctgcccca	5'	New	gp2b	.......((((((.((..((.(((..(.((((((((.......)))))))))..)))))..))...))))))...	65	45.3	-21.1	0.6	0	0	3.5	1.5	7	3	0	0	3.75585	1.94556	6.96422	2.36482	low
229	179	csn-miR5303j-p5_2ss10GT17CT	ATTCAAATTTCTGCCCTA	18	xpSc0053216	+	647028	647102	ATTCAAATTTCTGCCCTAtcaactttcgatggtaggatagtggcctactatggtggtgacgggtgacggagaatt	1	stu-MIR5303j,	stu-MIR5303j	gctcggactattcaaattgctgccccaccctgtgtaagatcctccaaaaatgactacttttgaaggattaaacacgcatccggcAATATTTTTGAAGAGTCTGAGCAA	stu-MIR5303j-p5	attcaaattgctgcccca	5'	New	gp2b	.......((((((.((..((.(((..(.((((((((.......)))))))))..)))))..))...))))))...	65	45.3	-21.1	0.6	0	0	3.5	1.5	7	3	0	0	3.75585	1.94556	6.96422	2.36482	low
230	180	csn-miR5368-p5_1ss6TC_1	CTGTTCCCTGGGATTGGCTTT	21	Sc0000212	-	1099504	1099592	aCTGTTCCCTGGGATTGGCTTTgggcctttcctgcgcaGCTTAGGTGGAGGGCGAAgaaggcctccttccgggggggcccgagccatca	1	gma-MIR5368,	gma-MIR5368	actgtttcctgggattggctttgggctttcctgcacagcttaggtggagggcaaagaagacttccttctgagggggccagagccatcagagagataccactctggacgagctagaattctaaccttgtgccaggacctatgggccgagGGACAGTCTCAGGTAGACAgt	gma-MIR5368-p5	ctgtttcctgggattggcttt	5'	New	gp2b	............((.((((.((((((((..((..(((..(((.....))).)))..(((((...))))).))..)))))))))))))).	76	64	-38.7	0.7	8	9	6	13	20.5	14	8.23798	7.74917	6.4386	16.8615	20.3952	11.0358	middle
230	181	csn-miR5368-p3_1ss16AG	GCTTAGGTGGAGGGCGAA	18	Sc0000212	-	1099504	1099592	aCTGTTCCCTGGGATTGGCTTTgggcctttcctgcgcaGCTTAGGTGGAGGGCGAAgaaggcctccttccgggggggcccgagccatca	1	gma-MIR5368,	gma-MIR5368	actgtttcctgggattggctttgggctttcctgcacagcttaggtggagggcaaagaagacttccttctgagggggccagagccatcagagagataccactctggacgagctagaattctaaccttgtgccaggacctatgggccgagGGACAGTCTCAGGTAGACAgt	gma-MIR5368-p3	gcttaggtggagggcaaa	3'	New	gp2b	............((.((((.((((((((..((..(((..(((.....))).)))..(((((...))))).))..)))))))))))))).	76	64	-38.7	0.7	1.5	4	5	0	6.5	3.5	1.54462	3.44407	5.3655	0	6.46677	2.75896	low
231	180	csn-miR5368-p5_1ss6TC_1	CTGTTCCCTGGGATTGGCTTT	21	Sc0000217	+	935285	935444	aCTGTTCCCTGGGATTGGCTTTgggcctttcctgcgcagcttaggtggagggcgaagaaggcccccttccgggggggcccgagccaTCAGTGAGATACCACTCTGGAagagctagaattctaaccttgtgttaagacctacgggccaagggacagtctca	1	gma-MIR5368,	gma-MIR5368	actgtttcctgggattggctttgggctttcctgcacagcttaggtggagggcaaagaagacttccttctgagggggccagagccatcagagagataccactctggacgagctagaattctaaccttgtgccaggacctatgggccgagGGACAGTCTCAGGTAGACAgt	gma-MIR5368-p5	ctgtttcctgggattggcttt	5'	New	gp2b	((((((((.(((...((((((.((((((..((.((...))...((.((.((((.......))))))..))))..)))))))))))).......(((((..(((.....))).(((....))).....)))))....((....))))).))))))))....	156	57.5	-60.5	0.7	8	9	6	13	20.5	14	8.23798	7.74917	6.4386	16.8615	20.3952	11.0358	middle
231	182	csn-miR5368-p3_1ss5AT	TCAGTGAGATACCACTCTGGA	21	Sc0000217	+	935285	935444	aCTGTTCCCTGGGATTGGCTTTgggcctttcctgcgcagcttaggtggagggcgaagaaggcccccttccgggggggcccgagccaTCAGTGAGATACCACTCTGGAagagctagaattctaaccttgtgttaagacctacgggccaagggacagtctca	1	gma-MIR5368,	gma-MIR5368	actgtttcctgggattggctttgggctttcctgcacagcttaggtggagggcaaagaagacttccttctgagggggccagagccatcagagagataccactctggacgagctagaattctaaccttgtgccaggacctatgggccgagGGACAGTCTCAGGTAGACAgt	gma-MIR5368-p3	tcagagagataccactctgga	3'	New	gp2b	((((((((.(((...((((((.((((((..((.((...))...((.((.((((.......))))))..))))..)))))))))))).......(((((..(((.....))).(((....))).....)))))....((....))))).))))))))....	156	57.5	-60.5	0.7	90.5	135	139.5	73	176	59	93.1921	116.237	149.697	94.6839	175.1	46.5082	middle
232	183	csn-miR5368-p5_1ss7TC	ACTGTTCCCTGGGATTGG	18	Sc0000217	+	938073	938220	caactttgagagggagagaaagagaccagaagctttACTGTTCCCTGGGATTGGagcttaggtgaagggcgaagaaggcccccttccgggggggcccgagccaTCAGTGAGATACCACTCTGGAagagctagaattctaaccttgtgt	1	gma-MIR5368,	gma-MIR5368	actgtttcctgggattggctttgggctttcctgcacagcttaggtggagggcaaagaagacttccttctgagggggccagagccatcagagagataccactctggacgagctagaattctaaccttgtgccaggacctatgggccgagGGACAGTCTCAGGTAGACAgt	gma-MIR5368-p5	actgtttcctgggattgg	5'	New	gp2b	.........((((...((((....(((..(((((..(..((((....)))))..))))).)))....(((......((((((((....))))))))....(((..((((......)))).)))....)))....))))..))))....	39	53.4	-45.8	0.6	0	1.5	0	0	1.5	0	0	1.29153	0	0	1.49233	0	low
232	182	csn-miR5368-p3_1ss5AT	TCAGTGAGATACCACTCTGGA	21	Sc0000217	+	938073	938220	caactttgagagggagagaaagagaccagaagctttACTGTTCCCTGGGATTGGagcttaggtgaagggcgaagaaggcccccttccgggggggcccgagccaTCAGTGAGATACCACTCTGGAagagctagaattctaaccttgtgt	1	gma-MIR5368,	gma-MIR5368	actgtttcctgggattggctttgggctttcctgcacagcttaggtggagggcaaagaagacttccttctgagggggccagagccatcagagagataccactctggacgagctagaattctaaccttgtgccaggacctatgggccgagGGACAGTCTCAGGTAGACAgt	gma-MIR5368-p3	tcagagagataccactctgga	3'	New	gp2b	.........((((...((((....(((..(((((..(..((((....)))))..))))).)))....(((......((((((((....))))))))....(((..((((......)))).)))....)))....))))..))))....	39	53.4	-45.8	0.6	90.5	135	139.5	73	176	59	93.1921	116.237	149.697	94.6839	175.1	46.5082	middle
233	184	csn-miR5368-p5_2ss15TC18CT	GATTGGCTTTGGGCCTTT	18	Sc0000668	+	438479	438511	tccttggGATTGGCTTTGGGCCTTTCctaattt	1	gma-MIR5368,	gma-MIR5368	actgtttcctgggattggctttgggctttcctgcacagcttaggtggagggcaaagaagacttccttctgagggggccagagccatcagagagataccactctggacgagctagaattctaaccttgtgccaggacctatgggccgagGGACAGTCTCAGGTAGACAgt	gma-MIR5368-p5	gattggctttgggctttc	5'	New	gp2b	...((((((..(((.....)))..))))))...	27	45.5	-12.8	0.9	3.5	6.5	5.5	0	1.5	1.5	3.60411	5.59662	5.90205	0	1.49233	1.18241	low
233	185	csn-miR5368-p3_2ss14TC17CT	ATTGGCTTTGGGCCTTTC	18	Sc0000668	+	438479	438511	tccttggGATTGGCTTTGGGCCTTTCctaattt	1	gma-MIR5368,	gma-MIR5368	actgtttcctgggattggctttgggctttcctgcacagcttaggtggagggcaaagaagacttccttctgagggggccagagccatcagagagataccactctggacgagctagaattctaaccttgtgccaggacctatgggccgagGGACAGTCTCAGGTAGACAgt	gma-MIR5368-p3	attggctttgggctttcc	3'	New	gp2b	...((((((..(((.....)))..))))))...	27	45.5	-12.8	0.9	0	1.5	2.5	0	0	0	0	1.29153	2.68275	0	0	0	low
234	186	csn-miR5368_L-2R+1	ACAGTCTCAGGTAGACAG	18	Sc0000946	+	221792	221824	ccaaggaACAGTCTCAGGTAGACAGTttctatg	1	gma-MIR5368,	gma-MIR5368	actgtttcctgggattggctttgggctttcctgcacagcttaggtggagggcaaagaagacttccttctgagggggccagagccatcagagagataccactctggacgagctagaattctaaccttgtgccaggacctatgggccgagGGACAGTCTCAGGTAGACAgt	gma-miR5368	GGACAGTCTCAGGTAGACA	5'	Diff	gp2b	...((((((.((((.....)))).))))))...	27	45.5	-8.5	0.6	0	0	0	0	2	0	0	0	0	0	1.98978	0	low
234	187	csn-miR5368-p3	CAGTCTCAGGTAGACAGT	18	Sc0000946	+	221792	221824	ccaaggaACAGTCTCAGGTAGACAGTttctatg	1	gma-MIR5368,	gma-MIR5368	actgtttcctgggattggctttgggctttcctgcacagcttaggtggagggcaaagaagacttccttctgagggggccagagccatcagagagataccactctggacgagctagaattctaaccttgtgccaggacctatgggccgagGGACAGTCTCAGGTAGACAgt	gma-MIR5368-p3	CAGTCTCAGGTAGACAgt	3'	New	gp2b	...((((((.((((.....)))).))))))...	27	45.5	-8.5	0.6	0	0	1.5	1.5	1.5	0	0	0	1.60965	1.94556	1.49233	0	low
235	188	csn-miR5368-p5_1ss4TC	GTTCCCTGGGATTGGCTTTG	20	Sc0001218	-	424521	424732	GTTCCCTGGGATTGGCTTTGgggctctcctgcgcagcttaggtggagggcgaaggaggcccccttccaggggggcccgagccatcagtgagataccactctggaagagctagAATTCTAACCTTGTGTCAGGACctacgggccaagggacagtctcaggtagacagtttctatggggcgtaggcctcccaaaaggtaacggaggcgtgcaaa	1	gma-MIR5368,	gma-MIR5368	actgtttcctgggattggctttgggctttcctgcacagcttaggtggagggcaaagaagacttccttctgagggggccagagccatcagagagataccactctggacgagctagaattctaaccttgtgccaggacctatgggccgagGGACAGTCTCAGGTAGACAgt	gma-MIR5368-p5	gtttcctgggattggctttg	5'	New	gp2b	((..((.(((((((((...(((((.(((((.(((..(((.....))).))).))))))))))(((((((((((......((.....))......)).))))))))).))))..))))).(((((.((..(((.((((((..(((((..((.((((.....)))).))..)).)))..)))))))))..)).)))))...))..)).......	111	58.5	-86.9	0.7	0	0	2.5	0	10	7	0	0	2.68275	0	9.94888	5.51792	low
235	189	csn-miR5368-p3_1ss16CT	AATTCTAACCTTGTGTCAGGAC	22	Sc0001218	-	424521	424732	GTTCCCTGGGATTGGCTTTGgggctctcctgcgcagcttaggtggagggcgaaggaggcccccttccaggggggcccgagccatcagtgagataccactctggaagagctagAATTCTAACCTTGTGTCAGGACctacgggccaagggacagtctcaggtagacagtttctatggggcgtaggcctcccaaaaggtaacggaggcgtgcaaa	1	gma-MIR5368,	gma-MIR5368	actgtttcctgggattggctttgggctttcctgcacagcttaggtggagggcaaagaagacttccttctgagggggccagagccatcagagagataccactctggacgagctagaattctaaccttgtgccaggacctatgggccgagGGACAGTCTCAGGTAGACAgt	gma-MIR5368-p3	aattctaaccttgtgccaggac	3'	New	gp2b	((..((.(((((((((...(((((.(((((.(((..(((.....))).))).))))))))))(((((((((((......((.....))......)).))))))))).))))..))))).(((((.((..(((.((((((..(((((..((.((((.....)))).))..)).)))..)))))))))..)).)))))...))..)).......	111	58.5	-86.9	0.7	195.5	121	122	157.5	239.5	357.5	201.316	104.183	130.918	204.284	238.276	281.808	middle
236	190	csn-miR5368-p5_1ss15CA	GATACCACTCTGGAAGAGCTA	21	Sc0003775	+	112336	112401	agtgtgaggtttgaacataGATACCACTCTGGAAGAGCTAgAATTCTAACCTTGTGTCAGGACcta	1	gma-MIR5368,	gma-MIR5368	actgtttcctgggattggctttgggctttcctgcacagcttaggtggagggcaaagaagacttccttctgagggggccagagccatcagagagataccactctggacgagctagaattctaaccttgtgccaggacctatgggccgagGGACAGTCTCAGGTAGACAgt	gma-MIR5368-p5	gataccactctggacgagcta	5'	New	gp2b	......(((((((.((((((.......(((((.....))))).........))))))))).)))).	15	42.4	-12.2	0.4	22	32.5	25	19.5	65	33	22.6544	27.9831	26.8275	25.2923	64.6677	26.013	middle
236	189	csn-miR5368-p3_1ss16CT	AATTCTAACCTTGTGTCAGGAC	22	Sc0003775	+	112336	112401	agtgtgaggtttgaacataGATACCACTCTGGAAGAGCTAgAATTCTAACCTTGTGTCAGGACcta	1	gma-MIR5368,	gma-MIR5368	actgtttcctgggattggctttgggctttcctgcacagcttaggtggagggcaaagaagacttccttctgagggggccagagccatcagagagataccactctggacgagctagaattctaaccttgtgccaggacctatgggccgagGGACAGTCTCAGGTAGACAgt	gma-MIR5368-p3	aattctaaccttgtgccaggac	3'	New	gp2b	......(((((((.((((((.......(((((.....))))).........))))))))).)))).	15	42.4	-12.2	0.4	195.5	121	122	157.5	239.5	357.5	201.316	104.183	130.918	204.284	238.276	281.808	middle
237	191	csn-miR5368-p5_1ss15AG	CTTAGGTGGAGGGCGAAGA	19	Sc0004267	-	103041	103154	CTTAGGTGGAGGGCGAAGAaggccccctttcgagggggctcaagccatcagtgagataccactctggaagagctaGAATTCTAACCTTGTGTCAagacctacgagccaagggac	1	gma-MIR5368,	gma-MIR5368	actgtttcctgggattggctttgggctttcctgcacagcttaggtggagggcaaagaagacttccttctgagggggccagagccatcagagagataccactctggacgagctagaattctaaccttgtgccaggacctatgggccgagGGACAGTCTCAGGTAGACAgt	gma-MIR5368-p5	cttaggtggagggcaaaga	5'	New	gp2b	.(((((.....(((......((((((((....))))))))....(((..((((......)))).)))....))).....)))))(((((..((.........))..)))))...	83	54.4	-34	0.5	0	0	2	1.5	1.5	0	0	0	2.1462	1.94556	1.49233	0	low
237	192	csn-miR5368-p3_1ss17CT	GAATTCTAACCTTGTGTCA	19	Sc0004267	-	103041	103154	CTTAGGTGGAGGGCGAAGAaggccccctttcgagggggctcaagccatcagtgagataccactctggaagagctaGAATTCTAACCTTGTGTCAagacctacgagccaagggac	1	gma-MIR5368,	gma-MIR5368	actgtttcctgggattggctttgggctttcctgcacagcttaggtggagggcaaagaagacttccttctgagggggccagagccatcagagagataccactctggacgagctagaattctaaccttgtgccaggacctatgggccgagGGACAGTCTCAGGTAGACAgt	gma-MIR5368-p3	gaattctaaccttgtgcca	3'	New	gp2b	.(((((.....(((......((((((((....))))))))....(((..((((......)))).)))....))).....)))))(((((..((.........))..)))))...	83	54.4	-34	0.5	13	21.5	15.5	6.5	15	4.5	13.3867	18.5119	16.6331	8.43076	14.9233	3.54723	middle
238	193	csn-miR5368-p5_1ss6TC_2	CTGTTCCCTGGGATTGGCTTTG	22	xpSc0054595	-	25385	25560	tttaCTGTTCCCTGGGATTGGCTTTGggcctttcctgcgcagcttaggtggagggcgaagaaggcccccttccgggggggcccgagccatcagtgagataccactctggaagagctagaATTCTAACCTTGTGTCAGGAcctacgggccaagggacagtctcaggtagacagtttc	1	gma-MIR5368,	gma-MIR5368	actgtttcctgggattggctttgggctttcctgcacagcttaggtggagggcaaagaagacttccttctgagggggccagagccatcagagagataccactctggacgagctagaattctaaccttgtgccaggacctatgggccgagGGACAGTCTCAGGTAGACAgt	gma-MIR5368-p5	ctgtttcctgggattggctttg	5'	New	gp2b	...((((((.((((((((((.((((((.((..((((((((((.(((((.....(((......((((((((....))))))))....(((..((((......)))).)))....))).....))))).).)))).))))).....)).))))))..))))))))))..))))))...	170	56.8	-76.2	0.8	8	9	6	13	20.5	14	8.23798	7.74917	6.4386	16.8615	20.3952	11.0358	middle
238	194	csn-miR5368-p3_1ss15CT	ATTCTAACCTTGTGTCAGGA	20	xpSc0054595	-	25385	25560	tttaCTGTTCCCTGGGATTGGCTTTGggcctttcctgcgcagcttaggtggagggcgaagaaggcccccttccgggggggcccgagccatcagtgagataccactctggaagagctagaATTCTAACCTTGTGTCAGGAcctacgggccaagggacagtctcaggtagacagtttc	1	gma-MIR5368,	gma-MIR5368	actgtttcctgggattggctttgggctttcctgcacagcttaggtggagggcaaagaagacttccttctgagggggccagagccatcagagagataccactctggacgagctagaattctaaccttgtgccaggacctatgggccgagGGACAGTCTCAGGTAGACAgt	gma-MIR5368-p3	attctaaccttgtgccagga	3'	New	gp2b	...((((((.((((((((((.((((((.((..((((((((((.(((((.....(((......((((((((....))))))))....(((..((((......)))).)))....))).....))))).).)))).))))).....)).))))))..))))))))))..))))))...	170	56.8	-76.2	0.8	122.5	77.5	93.5	130	217.5	251.5	126.144	66.7289	100.335	168.615	216.388	198.251	middle
239	195	csn-miR5368-p5_1ss3TC	TTCCCTGGGATTGGCTTTG	19	Sc0000073	-	1183288	1183322	tgTTCCCTGGGATTGGCTTTGagcctttcttgcgc	1	gma-MIR5368,	gma-MIR5368	actgtttcctgggattggctttgggctttcctgcacagcttaggtggagggcaaagaagacttccttctgagggggccagagccatcagagagataccactctggacgagctagaattctaaccttgtgccaggacctatgggccgagGGACAGTCTCAGGTAGACAgt	gma-MIR5368-p5	tttcctgggattggctttg	5'	New	gp2b	.........(((..(((.....)))..))).....	21	54.3	-7.8	0.4	0	2	1.5	1.5	3.5	5	0	1.72204	1.60965	1.94556	3.48211	3.94137	low
240	196	csn-miR5368-p5	AGGGACAGTCTCAGGTAGA	19	Sc0002084	-	195303	195444	gccaAGGGACAGTCTCAGGTAGAtagtttctataggcctccttattatttcgaactttctatttttggaatggaatatttatggaatctccatgaatataatgaaaccttattccatggtatttacgtgaggttcgtctttc	1	gma-MIR5368,	gma-MIR5368	actgtttcctgggattggctttgggctttcctgcacagcttaggtggagggcaaagaagacttccttctgagggggccagagccatcagagagataccactctggacgagctagaattctaaccttgtgccaggacctatgggccgagGGACAGTCTCAGGTAGACAgt	gma-MIR5368-p5	agGGACAGTCTCAGGTAGA	5'	New	gp2b	......(((((..((((.(((((((....((((.((.........(((((((((.........)))))))))..((((((((((.....))))))))))..............))))))))))))).))))..).))))...	133	35.9	-34.4	0.7	11.5	11	13	3.5	11	12.5	11.8421	9.4712	13.9503	4.53964	10.9438	9.85343	middle
241	197	csn-miR5368-p5_1ss16CT	AATTCTAACCTTGTGTCAGGA	21	Sc0004185	-	71934	72031	gctagAATTCTAACCTTGTGTCAGGAcctatgggccaagggacagtctcaagtaaacagtttctatgggacttaggcctcccaaaaggtaacgaaggc	1	gma-MIR5368,	gma-MIR5368	actgtttcctgggattggctttgggctttcctgcacagcttaggtggagggcaaagaagacttccttctgagggggccagagccatcagagagataccactctggacgagctagaattctaaccttgtgccaggacctatgggccgagGGACAGTCTCAGGTAGACAgt	gma-MIR5368-p5	aattctaaccttgtgccagga	5'	New	gp2b	(((....(((..(((((.((..(((.((((.((.(((((..((.((.........)).))..)).)))..)))))))))..)).)))))...))))))	98	48	-24.2	0.5	153.5	71	83	167	167	339.5	158.066	61.1323	89.0673	216.606	166.146	267.619	middle
242	198	csn-miR6149a_L-2R-1_1ss3GC	CATACGCACCTGAATCGG	18	Sc0000231	-	1052008	1052087	gagtgattgaggtgggaagtgatgaaagagggggtggagatgagagagcaccatgatttgCATACGCACCTGAATCGGag	2	nta-MIR6149a,nta-MIR6149b,	nta-MIR6149b	atgtcaaagcTTGATACGCACCTGAATCGGCaactacgtacagaccaatacatatgccgatctgggttcgtatcaaactatgatatac	nta-miR6149a	TTGATACGCACCTGAATCGGC	3'	Diff	gp2b	...(((((.(((((....(((.((........((((............))))........))))).))))).)))))...	74	51.2	-17.3	0.4	4.5	11	14	4	7	5.5	4.63386	9.4712	15.0234	5.18816	6.96422	4.33551	middle
243	198	csn-miR6149a_L-2R-1_1ss3GC	CATACGCACCTGAATCGG	18	Sc0003604	-	42559	42667	gaaggtggtggtggagtgattgaggtgggaagtgatgaaagagggggtggagacgagagagcgccatgatttgCATACGCACCTGAATCGGaggagcgagatcactaga	2	nta-MIR6149a,nta-MIR6149b,	nta-MIR6149b	atgtcaaagcTTGATACGCACCTGAATCGGCaactacgtacagaccaatacatatgccgatctgggttcgtatcaaactatgatatac	nta-miR6149a	TTGATACGCACCTGAATCGGC	3'	Diff	gp2b	...((((((.((....(((((.(((((....(((.(((((...((.(((....)......)).))....))).))))).))))).))))).....))...))))))...	103	54.1	-22.8	0.4	4.5	11	14	4	7	5.5	4.63386	9.4712	15.0234	5.18816	6.96422	4.33551	middle
244	199	csn-miR6173-p5_2	GGATTAGATACCCCAGTA	18	Sc0000417	+	39527	39621	cgaatgGGATTAGATACCCCAGTAgtcctagccataaacgatggatactaggcgctgtacgtatcgatccgtgtaGTGCTGTAGCTAACGCGTTA	1	hbr-MIR6173,	hbr-MIR6173	cgctgtgcgtatcgacccgtgcagtatccatcgtttaaagctaggggagcggaatgggattagataccccagtagtcctaAGCCGTAAACGATGGATACTgcacgggtcgatacggcacagcgctgtagctaacgcgtta	hbr-MIR6173-p5	ggattagataccccagta	5'	New	gp2b	......(((((.(((((..((((.(.(((((((((.....))))...))))))))))...))))))))))(((((((......))).))))....	64	48.4	-26.7	0.6	27.5	37.5	54	13	34	3	28.318	32.2882	57.9474	16.8615	33.8262	2.36482	middle
244	200	csn-miR6173-p3_1ss2CT	GTGCTGTAGCTAACGCGTTA	20	Sc0000417	+	39527	39621	cgaatgGGATTAGATACCCCAGTAgtcctagccataaacgatggatactaggcgctgtacgtatcgatccgtgtaGTGCTGTAGCTAACGCGTTA	1	hbr-MIR6173,	hbr-MIR6173	cgctgtgcgtatcgacccgtgcagtatccatcgtttaaagctaggggagcggaatgggattagataccccagtagtcctaAGCCGTAAACGATGGATACTgcacgggtcgatacggcacagcgctgtagctaacgcgtta	hbr-MIR6173-p3	gcgctgtagctaacgcgtta	3'	New	gp2b	......(((((.(((((..((((.(.(((((((((.....))))...))))))))))...))))))))))(((((((......))).))))....	64	48.4	-26.7	0.6	20.5	22.5	30	15	44.5	29.5	21.1098	19.3729	32.193	19.4556	44.2725	23.2541	middle
245	201	csn-miR6173-p5_1	GATACCCCAGTAGTCCTA	18	Sc0000602	+	774152	774246	cgaatgggattaGATACCCCAGTAGTCCTAgccgtaaacgatggatactaggcgctgtgcgtatcgacccgtgcaGTGCTGTAGCTAACGCGTTA	1	hbr-MIR6173,	hbr-MIR6173	cgctgtgcgtatcgacccgtgcagtatccatcgtttaaagctaggggagcggaatgggattagataccccagtagtcctaAGCCGTAAACGATGGATACTgcacgggtcgatacggcacagcgctgtagctaacgcgtta	hbr-MIR6173-p5	gataccccagtagtccta	5'	New	gp2b	((..((((((((..........))))))))..))..((((.((....((((((((((..((........))..))))))).)))....)))))).	34	52.6	-29.6	0.6	27.5	37.5	54	13	34	3	28.318	32.2882	57.9474	16.8615	33.8262	2.36482	middle
245	200	csn-miR6173-p3_1ss2CT	GTGCTGTAGCTAACGCGTTA	20	Sc0000602	+	774152	774246	cgaatgggattaGATACCCCAGTAGTCCTAgccgtaaacgatggatactaggcgctgtgcgtatcgacccgtgcaGTGCTGTAGCTAACGCGTTA	1	hbr-MIR6173,	hbr-MIR6173	cgctgtgcgtatcgacccgtgcagtatccatcgtttaaagctaggggagcggaatgggattagataccccagtagtcctaAGCCGTAAACGATGGATACTgcacgggtcgatacggcacagcgctgtagctaacgcgtta	hbr-MIR6173-p3	gcgctgtagctaacgcgtta	3'	New	gp2b	((..((((((((..........))))))))..))..((((.((....((((((((((..((........))..))))))).)))....)))))).	34	52.6	-29.6	0.6	20.5	22.5	30	15	44.5	29.5	21.1098	19.3729	32.193	19.4556	44.2725	23.2541	middle
246	202	csn-miR6173-p5_3	TGGGATTAGATACCCCAGTA	20	Sc0000602	+	748498	748616	ctaggccgacactgacactgagagacgaaagttagaggagtgaaTGGGATTAGATACCCCAGTAGTCCTAgccgtaaacgatggatactaggcactgtgcgtatcgacccgtgcagtgc	1	hbr-MIR6173,	hbr-MIR6173	cgctgtgcgtatcgacccgtgcagtatccatcgtttaaagctaggggagcggaatgggattagataccccagtagtcctaAGCCGTAAACGATGGATACTgcacgggtcgatacggcacagcgctgtagctaacgcgtta	hbr-MIR6173-p5	tgggattagataccccagta	5'	New	gp2b	.........(((((.((((....(((....))).....)))).(((((....(((((..((((.(.(((((((((.....))))...))))))))))...)))))..))))).))))).	69	52.1	-35.8	0.6	27.5	37.5	54	13	34	3	28.318	32.2882	57.9474	16.8615	33.8262	2.36482	middle
[truncated: 97 more rows]
