# Supplementary material for: Identification of Regulatory Networks of MicroRNAs and Their Targets in Response to Colletotrichum gloeosporioides in Tea Plant (Camellia sinensis L.)
Source: Front Plant Sci. 2019 Sep 12;10:1096. doi: 10.3389/fpls.2019.01096 (PMC6751461; doi:10.3389/fpls.2019.01096)
Supplement: Supplementary file 3 [file Table_3.xls]

## Sheet: novel miRNAs
Table S3: Summary of predicted novel miRNA in this study.
Pre-miRNA Index	miRNA Index	miRNA name	miRNA sequence	length	genomeID	strand	start	end	pre-miRNA sequence	type	Sequence in miRbase	group	Secondary Structure	hairpin Length	CG%	dG	MFEI	CK (raw reads)			CgIL4d (raw reads)			CK (norm reads)			CgIL4d (norm reads)			Expression level
																		CK1	CK2	CK3	CgIL4d1	CgIL4d2	CgIL4d3	CK1	CK2	CK3	CgIL4d1	CgIL4d2	CgIL4d3
1	1	PC-5p-172703_8	AGTACAAGTGAGAGATAGGACAAG	24	Sc0002592	+	125077	125247	aagcttgaagggtcacatttgtatgggAGTACAAGTGAGAGATAGGACAAGcatacaaatgtgaccaattttgcagttcaaatgtgacatcaagcaattttgtagttcaatctgttatccatgcttgtCCTATCTCTCACTTGTACTCCtatacaaatgtgatccttcaag	5'	New	gp4	...((((((((((((((((((((((((((((((((((((((((((((((((((((((.((..((((((..((((...(((....)))......))))..)))..)))..)).))).....)))))))))))))))))))))))))))))))))))))))))))))))))))	168	38	-97.2	1.5	2	2	1.5	0	0	0	2.05949	1.72204	1.60965	0	0	0	low
1	2	PC-3p-280956_4	CCTATCTCTCACTTGTACTCC	21	Sc0002592	+	125077	125247	aagcttgaagggtcacatttgtatgggAGTACAAGTGAGAGATAGGACAAGcatacaaatgtgaccaattttgcagttcaaatgtgacatcaagcaattttgtagttcaatctgttatccatgcttgtCCTATCTCTCACTTGTACTCCtatacaaatgtgatccttcaag	3'	New	gp4	...((((((((((((((((((((((((((((((((((((((((((((((((((((((.((..((((((..((((...(((....)))......))))..)))..)))..)).))).....)))))))))))))))))))))))))))))))))))))))))))))))))))	168	38	-97.2	1.5	0	0	0	0	0	2	0	0	0	0	0	1.57655	low
2	1	PC-5p-172703_8	AGTACAAGTGAGAGATAGGACAAG	24	Sc0002592	-	125173	125343	aagcttgaaggatcacatttgtataggAGTACAAGTGAGAGATAGGACAAGcatggataacagattgaactacaaaattgcttgatgtcacatttgaactgcaaaattggtcacatttgtatgcttgtCCTATCTCTCACTTGTACTCCcatacaaatgtgacccttcaag	5'	New	gp4	...((((((((.((((((((((((.(((((((((((((((((((((((((((((.....(((((((((.(((.....((((......(((....)))...))))...)))))).))))))))))))))))))))))))))))))))))).)))))))))))).))))))))	168	38	-92	1.4	2	2	1.5	0	0	0	2.05949	1.72204	1.60965	0	0	0	low
2	2	PC-3p-280956_4	CCTATCTCTCACTTGTACTCC	21	Sc0002592	-	125173	125343	aagcttgaaggatcacatttgtataggAGTACAAGTGAGAGATAGGACAAGcatggataacagattgaactacaaaattgcttgatgtcacatttgaactgcaaaattggtcacatttgtatgcttgtCCTATCTCTCACTTGTACTCCcatacaaatgtgacccttcaag	3'	New	gp4	...((((((((.((((((((((((.(((((((((((((((((((((((((((((.....(((((((((.(((.....((((......(((....)))...))))...)))))).))))))))))))))))))))))))))))))))))).)))))))))))).))))))))	168	38	-92	1.4	0	0	0	0	0	2	0	0	0	0	0	1.57655	low
3	3	PC-5p-345918_3	GGTAGTGCAATGGTGATGCCCAGT	24	Sc0001743	-	431354	431524	tcacttatgttgttggtagctcaagtGGTAGTGCAATGGTGATGCCCAGGcagaggcgtgggttcaaaccacgccaactccttctcaattttcaaaaaactcaattttcaaacaactaccTCGGCATCACCATTGCACTAccacttcagctaccaacaacataagtgatgc	5'	New	gp4	(((((((((((((((((((((.((((((((((((((((((((((((.(((.((.(((((((.......)))))))...................((((......)))).......)).))).)))))))))))))))))))))))).)))))))))))))))))))))...	168	45	-101.9	1.3	0	0	0	0	0	1.5	0	0	0	0	0	1.18241	low
3	4	PC-3p-83653_21	TCGGCATCACCATTGCACTT	20	Sc0001743	-	431354	431524	tcacttatgttgttggtagctcaagtGGTAGTGCAATGGTGATGCCCAGGcagaggcgtgggttcaaaccacgccaactccttctcaattttcaaaaaactcaattttcaaacaactaccTCGGCATCACCATTGCACTAccacttcagctaccaacaacataagtgatgc	3'	New	gp4	(((((((((((((((((((((.((((((((((((((((((((((((.(((.((.(((((((.......)))))))...................((((......)))).......)).))).)))))))))))))))))))))))).)))))))))))))))))))))...	168	45	-101.9	1.3	1.5	0	2.5	6.5	0	4.5	1.54462	0	2.68275	8.43076	0	3.54723	low
4	3	PC-5p-345918_3	GGTAGTGCAATGGTGATGCCCAGT	24	Sc0004081	-	75091	75261	tcacttatgttgttggtagctcaagtGGTAGTGCAATGGTGATGCCCAGGcagaggcgtgggttcaaaccacgccaactccttctcaattttcaaaaaactcaattttcaaacaactaccTCGGCATCACCATTGCACTAccacttcagctaccaacaacataagtgatgc	5'	New	gp4	(((((((((((((((((((((.((((((((((((((((((((((((.(((.((.(((((((.......)))))))...................((((......)))).......)).))).)))))))))))))))))))))))).)))))))))))))))))))))...	168	45	-101.9	1.3	0	0	0	0	0	1.5	0	0	0	0	0	1.18241	low
4	4	PC-3p-83653_21	TCGGCATCACCATTGCACTT	20	Sc0004081	-	75091	75261	tcacttatgttgttggtagctcaagtGGTAGTGCAATGGTGATGCCCAGGcagaggcgtgggttcaaaccacgccaactccttctcaattttcaaaaaactcaattttcaaacaactaccTCGGCATCACCATTGCACTAccacttcagctaccaacaacataagtgatgc	3'	New	gp4	(((((((((((((((((((((.((((((((((((((((((((((((.(((.((.(((((((.......)))))))...................((((......)))).......)).))).)))))))))))))))))))))))).)))))))))))))))))))))...	168	45	-101.9	1.3	1.5	0	2.5	6.5	0	4.5	1.54462	0	2.68275	8.43076	0	3.54723	low
5	5	PC-5p-105386_16	TGTGGCGCAGTTAAGAAGGGT	21	Sc0000104	+	101083	101291	ttacaattcatgtaggagtttggttgagcttgtatctcgattaggtgtattgctagaaaaatgtcctaTGTGGCACAGTTAAGAAGGGTtaagattgcgccacataggacatttttcaatcttaaccCTTCTTAACTGCGCCACATAGgacattttctggcagtacacctaatcgagatacaagctcaaccaaactcctacatgaattg	5'	New	gp4	...(((((((((((((((((((((((((((((((((((((((((((((((((((((((((.(((((((((((((.((((((((((((((((((((((..((.....))........)))))))))))))))))))))).))))))))))))))))))))))))))))))))))))))))))))))))))))))))))))))))))))))	206	39.7	-162.4	2	0	0	0	0	2	6	0	0	0	0	1.98978	4.72964	low
5	6	PC-3p-181630_8	CTTCTTAACTGCGCCACATAG	21	Sc0000104	+	101083	101291	ttacaattcatgtaggagtttggttgagcttgtatctcgattaggtgtattgctagaaaaatgtcctaTGTGGCACAGTTAAGAAGGGTtaagattgcgccacataggacatttttcaatcttaaccCTTCTTAACTGCGCCACATAGgacattttctggcagtacacctaatcgagatacaagctcaaccaaactcctacatgaattg	3'	New	gp4	...(((((((((((((((((((((((((((((((((((((((((((((((((((((((((.(((((((((((((.((((((((((((((((((((((..((.....))........)))))))))))))))))))))).))))))))))))))))))))))))))))))))))))))))))))))))))))))))))))))))))))))	206	39.7	-162.4	2	0	0	0	0	2.5	1.5	0	0	0	0	2.48722	1.18241	low
6	5	PC-5p-105386_16	TGTGGCGCAGTTAAGAAGGGT	21	Sc0000104	-	101141	101347	tacaattcatgtaggagtttggttgagcttgtatctcgattaggtgtactgccagaaaatgtcctaTGTGGCGCAGTTAAGAAGGGTtaagattgaaaaatgtcctatgtggcgcaatcttaaccCTTCTTAACTGTGCCACATAGgacatttttctagcaatacacctaatcgagatacaagctcaaccaaactcctacatgaatt	5'	New	gp4	...(((((((((((((((((((((((((((((((((((((((((((((.(((.((((((((((((((((((((((((((((((((((((((((((.....((((......)))))))))))))))))))))))))))))))))))))))).)))))).))).)))))))))))))))))))))))))))))))))))))))))))))	204	39.6	-156.7	1.9	0	0	0	0	2	6	0	0	0	0	1.98978	4.72964	low
6	6	PC-3p-181630_8	CTTCTTAACTGCGCCACATAG	21	Sc0000104	-	101141	101347	tacaattcatgtaggagtttggttgagcttgtatctcgattaggtgtactgccagaaaatgtcctaTGTGGCGCAGTTAAGAAGGGTtaagattgaaaaatgtcctatgtggcgcaatcttaaccCTTCTTAACTGTGCCACATAGgacatttttctagcaatacacctaatcgagatacaagctcaaccaaactcctacatgaatt	3'	New	gp4	...(((((((((((((((((((((((((((((((((((((((((((((.(((.((((((((((((((((((((((((((((((((((((((((((.....((((......)))))))))))))))))))))))))))))))))))))))).)))))).))).)))))))))))))))))))))))))))))))))))))))))))))	204	39.6	-156.7	1.9	0	0	0	0	2.5	1.5	0	0	0	0	2.48722	1.18241	low
7	7	PC-5p-330510_3	TTAGTTTAGGAGCCCAAAACA	21	xpSc0054331	+	71065	71252	cacgagttgggattctctgcaataatcctagcttgcaacaatcttgcaatgTTAGTTTAGGAGCCCAAAACAtaatcgttagatggtttaagagtggtttaatcttgcagtgattgtgTTTTGAGCTCCTAAACTAACAttgcaagattattgcaatttagaattattgtagagaatcccaactcaaa	5'	New	gp4	...(((((((((((((((((((((((.(((..((((((.(((((((((((((((((((((((((.(((((((((((((......((.(((((.....))))).)).....))))))))))))).))))))))))))))))))))))))).))))))..))).)))))))))))))))))))))))...	182	35.6	-107.2	1.6	0	0	0	0	0	1.5	0	0	0	0	0	1.18241	low
7	8	PC-3p-166056_9	TTTTGAGCTCCTAAACTAACA	21	xpSc0054331	+	71065	71252	cacgagttgggattctctgcaataatcctagcttgcaacaatcttgcaatgTTAGTTTAGGAGCCCAAAACAtaatcgttagatggtttaagagtggtttaatcttgcagtgattgtgTTTTGAGCTCCTAAACTAACAttgcaagattattgcaatttagaattattgtagagaatcccaactcaaa	3'	New	gp4	...(((((((((((((((((((((((.(((..((((((.(((((((((((((((((((((((((.(((((((((((((......((.(((((.....))))).)).....))))))))))))).))))))))))))))))))))))))).))))))..))).)))))))))))))))))))))))...	182	35.6	-107.2	1.6	1.5	0	0	0	3	0	1.54462	0	0	0	2.98467	0	low
8	7	PC-5p-330510_3	TTAGTTTAGGAGCCCAAAACA	21	xpSc0054331	-	70996	71183	tttgagttgggattctctacaataattctaaattgcaataatcttgcaatgTTAGTTTAGGAGCTCAAAACAcaatcactgcaagattaaaccactcttaaaccatctaacgattatgTTTTGGGCTCCTAAACTAACAttgcaagattgttgcaagctaggattattgcagagaatcccaactcgtg	5'	New	gp4	..((((((((((((((((.(((((((((((..((((((((((((((((((((((((((((((((((((((((.((((.......))))................(((....)))..))))))))))))))))))))))))))))))))))))))))..))))))))))).))))))))))))))))..	184	35.6	-108.3	1.6	0	0	0	0	0	1.5	0	0	0	0	0	1.18241	low
8	8	PC-3p-166056_9	TTTTGAGCTCCTAAACTAACA	21	xpSc0054331	-	70996	71183	tttgagttgggattctctacaataattctaaattgcaataatcttgcaatgTTAGTTTAGGAGCTCAAAACAcaatcactgcaagattaaaccactcttaaaccatctaacgattatgTTTTGGGCTCCTAAACTAACAttgcaagattgttgcaagctaggattattgcagagaatcccaactcgtg	3'	New	gp4	..((((((((((((((((.(((((((((((..((((((((((((((((((((((((((((((((((((((((.((((.......))))................(((....)))..))))))))))))))))))))))))))))))))))))))))..))))))))))).))))))))))))))))..	184	35.6	-108.3	1.6	1.5	0	0	0	3	0	1.54462	0	0	0	2.98467	0	low
9	9	PC-5p-134744_11	ACTGCACATTTTAGGAGAGCATGC	24	xpSc0053543	+	134044	134225	aaaccatataattatttgttactaaatattaacgtttcACTGCACATTTTAGGAGAGCATGTcaaaaaagcaaacgtcaaaaagtacaaaagttgatagcgggcattgttaattacttttttaacaTGTTCTCCTAAAATGTGCAGTgaaacgttactatttagtaacaaataattatatgg	5'	New	gp4	...(((((((((((((((((((((((((.(((((((((((((((((((((((((((((((((.(((((((...((........)).....(((((((((......))))))))).))))))).))))))))))))))))))))))))))))))))).)))))))))))))))))))))))))	179	28.6	-95.3	1.8	2	3.5	0	0	0	0	2.05949	3.01356	0	0	0	0	low
9	10	PC-3p-254233_5	TGTTCTCCTAAAATGTGCAGT	21	xpSc0053543	+	134044	134225	aaaccatataattatttgttactaaatattaacgtttcACTGCACATTTTAGGAGAGCATGTcaaaaaagcaaacgtcaaaaagtacaaaagttgatagcgggcattgttaattacttttttaacaTGTTCTCCTAAAATGTGCAGTgaaacgttactatttagtaacaaataattatatgg	3'	New	gp4	...(((((((((((((((((((((((((.(((((((((((((((((((((((((((((((((.(((((((...((........)).....(((((((((......))))))))).))))))).))))))))))))))))))))))))))))))))).)))))))))))))))))))))))))	179	28.6	-95.3	1.8	0	5	0	0	0	0	0	4.30509	0	0	0	0	low
10	9	PC-5p-134744_11	ACTGCACATTTTAGGAGAGCATGC	24	xpSc0053543	+	136733	136937	tacaaaattaaataacaattaaatcatataattatttgttattaaatattaacgtttcACTGCACATTTTAGGAGAGCATGCcaaagttgatagcgggcactactaattgcttttttgacATGCTCTTCTGAACTGTGCAGTGAaatgtttatatttttagtaacaaataattatatggtttaattgttatttaattttgtattg	5'	New	gp4	(((((((((((((((((((((((((((((((((((((((((((((((((.((((((((((((((((.((((((((((((((.((((((.....)).((((........))))..)))).)))))))))))))).)))))))))))))))).))))..)))))))))))))))))))))))))))))))))))))))))))))...	202	25.4	-102.3	2	2	3.5	0	0	0	0	2.05949	3.01356	0	0	0	0	low
10	11	PC-3p-32634_59	ATGCTCTTCTGAACTGTGCAGTGA	24	xpSc0053543	+	136733	136937	tacaaaattaaataacaattaaatcatataattatttgttattaaatattaacgtttcACTGCACATTTTAGGAGAGCATGCcaaagttgatagcgggcactactaattgcttttttgacATGCTCTTCTGAACTGTGCAGTGAaatgtttatatttttagtaacaaataattatatggtttaattgttatttaattttgtattg	3'	New	gp4	(((((((((((((((((((((((((((((((((((((((((((((((((.((((((((((((((((.((((((((((((((.((((((.....)).((((........))))..)))).)))))))))))))).)))))))))))))))).))))..)))))))))))))))))))))))))))))))))))))))))))))...	202	25.4	-102.3	2	11.5	14	6.5	5	6.5	8.5	11.8421	12.0543	6.97515	6.4852	6.46677	6.70033	middle
11	12	PC-5p-36833_52	TCTAAAGTGGTGTGTTGTATG	21	Sc0000811	+	49985	50152	caccaaggatcctctagagtttttttttcctaaagtttTCTAAAGTGGTGTGTTGTATGgttgagatttaatgttaaaaaattgatgtgacttgtcattaaatctcaACCATACAACACACCACTCTAAGAaactttaggaaaaaaaaatcctagaggatccttgctc	5'	New	gp4	...((((((((((((((..(((((((((((((((((((..((.((((((((((((((((((((((((((((((.......((....)).......)))))))))))))))))))))))))))))).))..)))))))))))))))))))..))))))))))))))...	162	33.3	-101.6	1.8	9	5	9	0	0	3	9.26772	4.30509	9.6579	0	0	2.36482	low
11	13	PC-3p-277031_4	ACCATACAACACACCACTCTAAGA	24	Sc0000811	+	49985	50152	caccaaggatcctctagagtttttttttcctaaagtttTCTAAAGTGGTGTGTTGTATGgttgagatttaatgttaaaaaattgatgtgacttgtcattaaatctcaACCATACAACACACCACTCTAAGAaactttaggaaaaaaaaatcctagaggatccttgctc	3'	New	gp4	...((((((((((((((..(((((((((((((((((((..((.((((((((((((((((((((((((((((((.......((....)).......)))))))))))))))))))))))))))))).))..)))))))))))))))))))..))))))))))))))...	162	33.3	-101.6	1.8	8	0	0	0	1.5	0	8.23798	0	0	0	1.49233	0	low
12	12	PC-5p-36833_52	TCTAAAGTGGTGTGTTGTATG	21	Sc0001128	+	111922	112081	taaggattctttagagttttttctttaaagtttTCTAAAGTGGTGTGTTGTATGggtgagatttaatgctaaaaaattgatgtgacttgtcattaaatctcaaccatacaacacatcactctaaaaaactttagaaaaaaaaaactctagaggatgctta	5'	New	gp4	((((.(((((((((((((((((.(((((((((((.((.(((((((((((((((((.(((((((((((((...................).)))))))))))).))))))))))))))))).)).)))))))))))...))))))))))))))))).))))	160	28.8	-74.6	1.6	9	5	9	0	0	3	9.26772	4.30509	9.6579	0	0	2.36482	low
13	13	PC-3p-277031_4	ACCATACAACACACCACTCTAAGA	24	xfSc0024521	+	808	927	ctactctaaagtttcctaaagtggtttgttgtatgggtgagatttaatgctaaaaaattgatgtgacttgtcattaaatctcaACCATACAACACACCACTCTAAGAaattttagagaaa	3'	New	gp4	...((((((((((((.((.((((((.((((((((((.(((((((((((((...................).)))))))))))).)))))))))).)))))).)).))))))))))))...	114	31.7	-53.6	1.4	8	0	0	0	1.5	0	8.23798	0	0	0	1.49233	0	low
14	14	PC-5p-93784_18	TAGTCTGTTGTTCGCAATGTTGGT	24	Sc0000124	+	537859	538057	atttgcattggttgatcttgtattgaagcatcgacctattaattttcctgatttgTAGTCTGTTGTTCGCAATGTTGGTtcttaggttattactgaagaggtccagaaaatgatgctaaaacctcttcagtaataacctgagaacCAACATTGTGAGCAACAGACTACAaatagagaaaattaaaaggttgaaacttca	5'	New	gp4	...((((...........))))..((((..(((((((.(((((((((((.((((((((((((((((((((((((((((((((((((((((((((((((((((..((.........))...)))))))))))))))))))))))))))))))))))))))))))))))))))))).))))))))).)))))))..)))).	174	34.7	-111.8	1.6	9	9.5	1.5	1.5	0	0	9.26772	8.17967	1.60965	1.94556	0	0	low
14	15	PC-3p-411361_3	CAACATTGTGAGCAACAGACTACA	24	Sc0000124	+	537859	538057	atttgcattggttgatcttgtattgaagcatcgacctattaattttcctgatttgTAGTCTGTTGTTCGCAATGTTGGTtcttaggttattactgaagaggtccagaaaatgatgctaaaacctcttcagtaataacctgagaacCAACATTGTGAGCAACAGACTACAaatagagaaaattaaaaggttgaaacttca	3'	New	gp4	...((((...........))))..((((..(((((((.(((((((((((.((((((((((((((((((((((((((((((((((((((((((((((((((((..((.........))...)))))))))))))))))))))))))))))))))))))))))))))))))))))).))))))))).)))))))..)))).	174	34.7	-111.8	1.6	0	3	0	0	0	0	0	2.58306	0	0	0	0	low
15	14	PC-5p-93784_18	TAGTCTGTTGTTCGCAATGTTGGT	24	Sc0000124	+	538235	538391	ttttcttgatttgTAGTCTGTTGTTCGCAATGTTGGTtcttaggttactactgaagaggttttggcatcgtggtctggaggtccagaaaatgatgccaaaacctcttcagtaataacctgagaaccAACATTGCGAGCAACAGACTACAAatcgaga	5'	New	gp4	...((((((((((((((((((((((((((((((((((((((((((((.(((((((((((((((((((((((..(((((....)))))..))))))))))))))))))))))).))))))))))))))))))))))))))))))))))))))))))))	154	41.4	-126.8	2	9	9.5	1.5	1.5	0	0	9.26772	8.17967	1.60965	1.94556	0	0	low
15	16	PC-3p-435158_3	AACATTGCGAGCAACAGACTACAA	24	Sc0000124	+	538235	538391	ttttcttgatttgTAGTCTGTTGTTCGCAATGTTGGTtcttaggttactactgaagaggttttggcatcgtggtctggaggtccagaaaatgatgccaaaacctcttcagtaataacctgagaaccAACATTGCGAGCAACAGACTACAAatcgaga	3'	New	gp4	...((((((((((((((((((((((((((((((((((((((((((((.(((((((((((((((((((((((..(((((....)))))..))))))))))))))))))))))).))))))))))))))))))))))))))))))))))))))))))))	154	41.4	-126.8	2	3	0	0	0	0	0	3.08924	0	0	0	0	0	low
16	17	PC-5p-50397_37	AAAACTGTCATGAAAATCATCTGC	24	Sc0000259	+	647083	647187	acgtttcatgAAAACTGTCATGAAAATCATCTGCaccgttggttcatgagacacatacctgatctaACGGTGCAGATGGTTTTCATGACAgttttcatgaaaatt	5'	New	gp4	...(((((((((((((((((((((((((((((((((((((((.(((.............))).)))))))))))))))))))))))))))))))))))))))...	99	38.1	-65.6	1.6	22.5	13	3	0	0	0	23.1693	11.1932	3.2193	0	0	0	middle
16	18	PC-3p-37081_51	ACGGTGCAGATGGTTTTCATGACA	24	Sc0000259	+	647083	647187	acgtttcatgAAAACTGTCATGAAAATCATCTGCaccgttggttcatgagacacatacctgatctaACGGTGCAGATGGTTTTCATGACAgttttcatgaaaatt	3'	New	gp4	...(((((((((((((((((((((((((((((((((((((((.(((.............))).)))))))))))))))))))))))))))))))))))))))...	99	38.1	-65.6	1.6	20	15	3	5	0	6.5	20.5949	12.9153	3.2193	6.4852	0	5.12378	middle
17	17	PC-5p-50397_37	AAAACTGTCATGAAAATCATCTGC	24	Sc0006064	+	48437	48541	acgtttcatgAAAACTGTCATGAAAATCATCTGCaccgttggttcatgagacacatacctgatctaACGGTGCAGATGGTTTTCATGACAgttttcatgaaaatt	5'	New	gp4	...(((((((((((((((((((((((((((((((((((((((.(((.............))).)))))))))))))))))))))))))))))))))))))))...	99	38.1	-65.6	1.6	22.5	13	3	0	0	0	23.1693	11.1932	3.2193	0	0	0	middle
17	18	PC-3p-37081_51	ACGGTGCAGATGGTTTTCATGACA	24	Sc0006064	+	48437	48541	acgtttcatgAAAACTGTCATGAAAATCATCTGCaccgttggttcatgagacacatacctgatctaACGGTGCAGATGGTTTTCATGACAgttttcatgaaaatt	3'	New	gp4	...(((((((((((((((((((((((((((((((((((((((.(((.............))).)))))))))))))))))))))))))))))))))))))))...	99	38.1	-65.6	1.6	20	15	3	5	0	6.5	20.5949	12.9153	3.2193	6.4852	0	5.12378	middle
18	19	PC-5p-105990_16	CTAAAGTGGTGTGTTGTATGGGTG	24	Sc0005968	+	13948	14113	accaaggatcctctagagttttttttttctaaagtttcCTAAAGTGGTGTGTTGTATGGGTGagatttaatgctaaaaaattgatgtgacttgtaattaaatttcaACCATACAACACACCACTCTAGGAaactttagagaaaaaaaattctagaagatccttact	5'	New	gp4	...(((((((.((((((((((((((((((((((((((((((.(((((((((((((((((.(((((((((((((...................)).))))))))))).))))))))))))))))).)))))))))))))))))))))))))))))).)))))))...	160	31.3	-92.5	1.8	4	2.5	1.5	0	0	0	4.11899	2.15255	1.60965	0	0	0	low
18	20	PC-3p-33556_57	ACCATACAACACACCACTCTAGGA	24	Sc0005968	+	13948	14113	accaaggatcctctagagttttttttttctaaagtttcCTAAAGTGGTGTGTTGTATGGGTGagatttaatgctaaaaaattgatgtgacttgtaattaaatttcaACCATACAACACACCACTCTAGGAaactttagagaaaaaaaattctagaagatccttact	3'	New	gp4	...(((((((.((((((((((((((((((((((((((((((.(((((((((((((((((.(((((((((((((...................)).))))))))))).))))))))))))))))).)))))))))))))))))))))))))))))).)))))))...	160	31.3	-92.5	1.8	12.5	11	1.5	2.5	0	3	12.8718	9.4712	1.60965	3.2426	0	2.36482	middle
19	20	PC-3p-33556_57	ACCATACAACACACCACTCTAGGA	24	Sc0002039	+	275616	275779	ccaaggatcctctaaaatttttttttcctaaagtttcctaaagtggtgtgttgtatggataagatttaatgctaaaaaattgatgtgacttgttattaaatctcaACCATACAACACACCACTCTAGGAaactttagaaaaaaaaaactctagaggatccttac	3'	New	gp4	..((((((((((((...(((((((((.(((((((((((((.(((((((((((((((((...(((((((((((...................).))))))))))...))))))))))))))))).))))))))))))).)))))))))...))))))))))))..	160	31.1	-81.1	1.6	12.5	11	1.5	2.5	0	3	12.8718	9.4712	1.60965	3.2426	0	2.36482	middle
20	19	PC-5p-105990_16	CTAAAGTGGTGTGTTGTATGGGTG	24	Sc0005008	+	80031	80195	ccaaggatcctctagagtttttttttcctaaagtttcCTAAAGTGGTGTGTTGTATGGGTGagatttaatgctaaaaaattgatgtaacttgttattaaatctcaactatacaacacactactctaggaaactttagggaaaaaaaaactctagaggatccttac	5'	New	gp4	..((((((((((((((((((((((((((((((((((((((.(((((((((((((((((.(((((((((((((...................).)))))))))))).))))))))))))))))).)))))))))))).))))))))))))))))))))))))))..	161	32.7	-97.8	1.8	4	2.5	1.5	0	0	0	4.11899	2.15255	1.60965	0	0	0	low
21	21	PC-5p-41899_45	TGGTTTACCATCTTATGTGGCACA	24	Sc0000881	+	212571	212734	gtaacagcgccgctaggctaaccatctctttctgccatattTGGTTTACCATCTTATGTGGCACAttcacatgtcattaatatccaatacaaatgtgaGTGTGTCACATAAGATGGTAAACCaaatatggtagaaagggatggtcatcctagcattgttgttag	5'	New	gp4	.((((((((..((((((...((((((((((((((((((((((((((((((((((((((((((((((((((((....................))))))))))))))))))))))))))))))))))))))))))))))))))))...))))))..)))))))).	162	39.6	-106.1	1.6	13	15	1.5	0	0	0	13.3867	12.9153	1.60965	0	0	0	middle
21	22	PC-3p-76994_23	GTGTGTCACATAAGATGGTAAACC	24	Sc0000881	+	212571	212734	gtaacagcgccgctaggctaaccatctctttctgccatattTGGTTTACCATCTTATGTGGCACAttcacatgtcattaatatccaatacaaatgtgaGTGTGTCACATAAGATGGTAAACCaaatatggtagaaagggatggtcatcctagcattgttgttag	3'	New	gp4	.((((((((..((((((...((((((((((((((((((((((((((((((((((((((((((((((((((((....................))))))))))))))))))))))))))))))))))))))))))))))))))))...))))))..)))))))).	162	39.6	-106.1	1.6	10	8	5	0	0	0	10.2975	6.88815	5.3655	0	0	0	middle
22	21	PC-5p-41899_45	TGGTTTACCATCTTATGTGGCACA	24	Sc0000881	-	212636	212785	caatgctaggatgaccatccctttctaccatattTGGTTTACCATCTTATGTGACACActcacatttgtattggatattaatgacatgtgaatgtgccacataagatggtaaaccaaatatggcagaaagagatggttagcctagcggcg	5'	New	gp4	...(((((((.((((((((.((((((.((((((((((((((((((((((((((.((((.((((((...(((((.....)))))..)))))).)))).)))))))))))))))))))))))))).)))))).)))))))).)))))))...	144	40	-87.5	1.5	13	15	1.5	0	0	0	13.3867	12.9153	1.60965	0	0	0	middle
23	23	PC-5p-152420_10	CGACTGACGTGTTCAACTTGA	21	Sc0000834	-	649319	649467	agtagtgatttcaatccaaaattcaagtagagacCGACTGACGTGTTCAACTTGAattgggcggtgtggtgggccatcatatcattgtccaattCAAGTCGAACATGTCAGTTGGttttggcttgactttcggcttacaaatcattttt	5'	New	gp4	...((((((((....((.(((.((((((..((((((((((((((((((.((((((((((((((((((((((...)))))))))...))))))))))))).))))))))))))))))))..)))))).))).)).....))))))))...	143	40.9	-73.3	1.2	3.5	1.5	0	1.5	0	2	3.60411	1.29153	0	1.94556	0	1.57655	low
23	24	PC-3p-16679_112	CAAGTCGAACATGTCAGTTGG	21	Sc0000834	-	649319	649467	agtagtgatttcaatccaaaattcaagtagagacCGACTGACGTGTTCAACTTGAattgggcggtgtggtgggccatcatatcattgtccaattCAAGTCGAACATGTCAGTTGGttttggcttgactttcggcttacaaatcattttt	3'	New	gp4	...((((((((....((.(((.((((((..((((((((((((((((((.((((((((((((((((((((((...)))))))))...))))))))))))).))))))))))))))))))..)))))).))).)).....))))))))...	143	40.9	-73.3	1.2	19	30	16	29	46	35	19.5652	25.8306	17.1696	37.6141	45.7649	27.5896	middle
24	23	PC-5p-152420_10	CGACTGACGTGTTCAACTTGA	21	Sc0000834	-	649439	649587	agtagtgatttcaatccaaaattcaagtagagacCGACTGACGTGTTCAACTTGAattgggcggtgtggtgggccatcatatcattgtccaattcaagtcgaacatgtcagttggttttggcttgactttcggcttacaaatcattttt	5'	New	gp4	...((((((((....((.(((.((((((..((((((((((((((((((.((((((((((((((((((((((...)))))))))...))))))))))))).))))))))))))))))))..)))))).))).)).....))))))))...	143	40.9	-73.3	1.2	3.5	1.5	0	1.5	0	2	3.60411	1.29153	0	1.94556	0	1.57655	low
25	25	PC-5p-62252_30	AAAATTGTAGTACTGGAACCC	21	Sc0000766	+	431621	431780	tcattactcagctagaatccagaaatcagtAAAATTGTAGTACTGGAACCCctctcgtttccatttgcacacgttcaaatggaaataaggaggtgaaatggaaacgagggggTTCCAGTACTACAATTTTACTgatttccggattctaggtgagtaagga	5'	New	gp4	((.(((((((.(((((((((.(((((((((((((((((((((((((((((((.(((((((((((((...(((.(((..((....))..))).))))))))))))))))))))))))))))))))))))))))))))))).))))))))).))))))).))	160	40.6	-106.3	1.6	3.5	7	1.5	5	5	12	3.60411	6.02713	1.60965	6.4852	4.97444	9.45929	low
25	26	PC-3p-435977_3	TTCCAGTACTACAATTTTACT	21	Sc0000766	+	431621	431780	tcattactcagctagaatccagaaatcagtAAAATTGTAGTACTGGAACCCctctcgtttccatttgcacacgttcaaatggaaataaggaggtgaaatggaaacgagggggTTCCAGTACTACAATTTTACTgatttccggattctaggtgagtaagga	3'	New	gp4	((.(((((((.(((((((((.(((((((((((((((((((((((((((((((.(((((((((((((...(((.(((..((....))..))).))))))))))))))))))))))))))))))))))))))))))))))).))))))))).))))))).))	160	40.6	-106.3	1.6	1.5	0	0	0	0	0	1.54462	0	0	0	0	0	low
26	25	PC-5p-62252_30	AAAATTGTAGTACTGGAACCC	21	Sc0000766	+	431113	431270	tcattactcagctagaatccagaaatcagtAAAATTGTAGTACTGGAACCCctcttgtttccatttgcacacgttcaaatggaaataaggaggtgaaatggaaaCGAGGGTTCCAGTACTACAATtttactgatttccggattctaggtgagtaagga	5'	New	gp4	((.(((((((.(((((((((.((((((((((((((((((((((((((((((.(((((((((((((((........))))))))))))))).........(....)..)))))))))))))))))))))))))))))).))))))))).))))))).))	158	39.2	-95.7	1.5	3.5	7	1.5	5	5	12	3.60411	6.02713	1.60965	6.4852	4.97444	9.45929	low
27	27	PC-5p-322034_3	AAGTTTCTTAAAGTGGTGTGTTGT	24	Sc0000399	+	56303	56471	caccaaggatcctctagagttttttttccctaAAGTTTCTTAAAGTGGTGTGTTGTgtgggtgagatttaatactaaaaaattgatgtgacttgtcattaaacctcaaccatacaACACACCACTCTAGGAAACTTTAGagagaaaaaaactctagaggatctttgctc	5'	New	gp4	...(((((((((((((((((((((((((.(((((((((((((.(((((((((((((((((.((((.((((((((...................)).)))))).)))).))))))))))))))))).))))))))))))).))).))))))))))))))))))))))...	163	36.1	-90.5	1.5	3	0	0	0	0	0	3.08924	0	0	0	0	0	low
27	28	PC-3p-249200_5	ACACACCACTCTAGGAAACTTTAG	24	Sc0000399	+	56303	56471	caccaaggatcctctagagttttttttccctaAAGTTTCTTAAAGTGGTGTGTTGTgtgggtgagatttaatactaaaaaattgatgtgacttgtcattaaacctcaaccatacaACACACCACTCTAGGAAACTTTAGagagaaaaaaactctagaggatctttgctc	3'	New	gp4	...(((((((((((((((((((((((((.(((((((((((((.(((((((((((((((((.((((.((((((((...................)).)))))).)))).))))))))))))))))).))))))))))))).))).))))))))))))))))))))))...	163	36.1	-90.5	1.5	4.5	0	0	0	0	0	4.63386	0	0	0	0	0	low
28	28	PC-3p-249200_5	ACACACCACTCTAGGAAACTTTAG	24	Sc0002315	+	275253	275421	caccaaggatcctctagagtttttttttcctaaagtttcctaaagtggtgtgttgtatgggtgaaatttaatgctaaaaaattgatgtgacttgtcattaaatctcaaccatacaACACACCACTCTAGGAAACTTTAGgaaaaaaaaaactctagagaatccttgctc	3'	New	gp4	...(((((((.(((((((((((((((((((((((((((((((.(((((((((((((((((.(((.(((((((((...................).)))))))).))).))))))))))))))))).))))))))))))))))))))))).)))))))).)))))))...	163	34.3	-93.9	1.6	4.5	0	0	0	0	0	4.63386	0	0	0	0	0	low
29	29	PC-5p-256922_5	CTAGAGTGGTGTGTTGTATGGTT	23	Sc0000471	+	515892	516097	tcttgccattagttatgagcaaggatcctctagagttttttttccttaaagttttCTAGAGTGGTGTGTTGTATGGTTgagatttaatgacaagtcacatcaattttttagcattaaatcTCACCCATACAATACACCACTttaggaaattttaggaaaaaaaaactctagaggatccttggtgttagttgtgttgtatggtagct	5'	New	gp4	..(((((((....((..(.((((((((((((((((((((((((.((((((((((((((((((((((((((((((((.((((((((((((..(((............)))..)))))))))))).)))))))))))))))))))))))))))))))).)))))))))))))))))))))))).......)..))....)))))))..	202	34	-106.2	1.5	5	0	0	0	0	0	5.14874	0	0	0	0	0	low
29	30	PC-3p-222660_6	TCACCCATACAATACACCACT	21	Sc0000471	+	515892	516097	tcttgccattagttatgagcaaggatcctctagagttttttttccttaaagttttCTAGAGTGGTGTGTTGTATGGTTgagatttaatgacaagtcacatcaattttttagcattaaatcTCACCCATACAATACACCACTttaggaaattttaggaaaaaaaaactctagaggatccttggtgttagttgtgttgtatggtagct	3'	New	gp4	..(((((((....((..(.((((((((((((((((((((((((.((((((((((((((((((((((((((((((((.((((((((((((..(((............)))..)))))))))))).)))))))))))))))))))))))))))))))).)))))))))))))))))))))))).......)..))....)))))))..	202	34	-106.2	1.5	4	0	5.5	0	0	0	4.11899	0	5.90205	0	0	0	low
30	30	PC-3p-222660_6	TCACCCATACAATACACCACT	21	xpSc0057733	+	7228	7428	gctggctttttgtttggagtaaggattctctagagtttttttttcctaaagtttcctaaagtggtgcattgtgtggttgagatttaatgacaagtcacatcaatttttcaatattaaatcTCACCCATACAATACACCACTttaggaaactttaggaaaaaaaaaaaactctagaggatccttggtacttatgagctattt	3'	New	gp4	..((((((........((((((((((((((((((((((((((((((((((((((((((((((((((.(((((((((.(((((((((((((.((((.......)))).)))...)))))))))).))))))))).))))))))))))))))))))))))))))))...)))))))))))))))...)))))..))))))...	196	32.8	-102	1.5	4	0	5.5	0	0	0	4.11899	0	5.90205	0	0	0	low
31	31	PC-5p-471688_3	TTTGTGGCCACAATTGCTTAA	21	xpSc0053665	-	149644	149779	ctagagggacacaattTTTGTGGCCACAATGGCTTAAaattaccaaaacgatgtcgttttggcatgttttgcacccaaaacgacgtcgttttgatagttTTGAGCCATTATGACCACAAAaattgtggccctcaaa	5'	New	gp4	...(((((.((((((((((((((.((.(((((((((((((((.(((((((((((((((((((..((.....)).))))))))))))))))))).))))))))))))))).)).)))))))))))))).)))))...	130	40.4	-81.8	1.5	0	0	0	0	3	0	0	0	0	0	2.98467	0	low
31	32	PC-3p-51907_36	TTGAGCCATTATGACCACAAT	21	xpSc0053665	-	149644	149779	ctagagggacacaattTTTGTGGCCACAATGGCTTAAaattaccaaaacgatgtcgttttggcatgttttgcacccaaaacgacgtcgttttgatagttTTGAGCCATTATGACCACAAAaattgtggccctcaaa	3'	New	gp4	...(((((.((((((((((((((.((.(((((((((((((((.(((((((((((((((((((..((.....)).))))))))))))))))))).))))))))))))))).)).)))))))))))))).)))))...	130	40.4	-81.8	1.5	4.5	2.5	4	0	4	3	4.63386	2.15255	4.2924	0	3.97955	2.36482	low
32	32	PC-3p-51907_36	TTGAGCCATTATGACCACAAT	21	xfSc0000190	-	203255	203404	aacaatgttagagggttacaatttttgtggtcacaatggctcaaaattgtcaaaactacgtcgttttgtcatgttctgcacctaaaacgacgtcgttttgacagttTTGAGCCATTATGACCACAAAaattgtggccctcaaacattttc	3'	New	gp4	...((((((.(((((..((((((((((((((((.((((((((((((((((((((((.(((((((((((...((.....))..))))))))))).)))))))))))))))))))))).))))))))))))))))..))))).))))))...	144	38	-91.7	1.6	4.5	2.5	4	0	4	3	4.63386	2.15255	4.2924	0	3.97955	2.36482	low
33	33	PC-5p-464972_3	ATAGCTCTTTGATCGGAACACATT	24	xfSc0000163	+	208972	209083	ccagataccgATAGCTCTTTGATCGGAACACATTtttgtcagtagtaaatatgatttttaaaataaattgttaacaaaaaTGTATTCCGATCGAGGGGCTATcgatattcga	5'	New	gp4	...((((.((((((((((((((((((((.((((((((((((((..((((.......))))......))))...)))))))))).)))))))))))))))))))).))))...	106	33	-45.1	1.2	3	0	0	0	0	0	3.08924	0	0	0	0	0	low
33	34	PC-3p-44723_42	TGTATTCCGATCGAGGGGCTAT	22	xfSc0000163	+	208972	209083	ccagataccgATAGCTCTTTGATCGGAACACATTtttgtcagtagtaaatatgatttttaaaataaattgttaacaaaaaTGTATTCCGATCGAGGGGCTATcgatattcga	3'	New	gp4	...((((.((((((((((((((((((((.((((((((((((((..((((.......))))......))))...)))))))))).)))))))))))))))))))).))))...	106	33	-45.1	1.2	3	8	1.5	1.5	2.5	4.5	3.08924	6.88815	1.60965	1.94556	2.48722	3.54723	low
34	34	PC-3p-44723_42	TGTATTCCGATCGAGGGGCTAT	22	Sc0000721	+	468307	468418	tcagatatcgatagctccttgattgaaatacatttttgtcgatggtaaatatgattttaaaaataaattattgacaaaatTGTATTCCGATCAAGGGGCTATcgatatccaa	3'	New	gp4	...((((((((((((((((((((((.((((((.((((((((((..(....................)..)))))))))).)))))).))))))))))))))))))))))...	106	29.5	-53.2	1.6	3	8	1.5	1.5	2.5	4.5	3.08924	6.88815	1.60965	1.94556	2.48722	3.54723	low
35	35	PC-5p-229406_6	AAATTCTGTGGCTCAAATGGTTCG	24	Sc0001258	+	38531	38703	tcttaggaaaatgtttggtggccacAAATTCTGTGGCTCAAATGGTTCGaaaatgctaaaacgatgtcgttttgacattttcagagttgttttgtacccaaaacgatgtcattttgacATTTTCGAGCCATTTGAACCACAGaatttgtggccacaaatcattgcccctattc	5'	New	gp4	...((((..((((....(((((((((((((((((((.((((((((((((((((((..((((.((..(((((((((((....(......)...)))...))))))))..)).))))..)))))))))))))))))).)))))))))))))))))))....))))...))))...	167	38.7	-87.9	1.3	3.5	1.5	0	0	0	0	3.60411	1.29153	0	0	0	0	low
35	36	PC-3p-202646_7	ATTTTCGAGCCATTTGAACCACAG	24	Sc0001258	+	38531	38703	tcttaggaaaatgtttggtggccacAAATTCTGTGGCTCAAATGGTTCGaaaatgctaaaacgatgtcgttttgacattttcagagttgttttgtacccaaaacgatgtcattttgacATTTTCGAGCCATTTGAACCACAGaatttgtggccacaaatcattgcccctattc	3'	New	gp4	...((((..((((....(((((((((((((((((((.((((((((((((((((((..((((.((..(((((((((((....(......)...)))...))))))))..)).))))..)))))))))))))))))).)))))))))))))))))))....))))...))))...	167	38.7	-87.9	1.3	10	0	0	0	0	3	10.2975	0	0	0	0	2.36482	middle
36	35	PC-5p-229406_6	AAATTCTGTGGCTCAAATGGTTCG	24	Sc0000443	-	365223	365338	ggaccacAAATTCTGTGGCTCAAATGGTTCGaaactgtcaaaacgacatcgttttgcacccaaaacgacatcgttttgggtgttttgagccattcgagccacataatttgtggcca	5'	New	gp4	((.(((((((((.((((((((.(((((((((((((...(((((((....))))))).((((((((((....))))))))))))))))))))))).)))))))).))))))))))).	115	44.8	-69.7	1.3	3.5	1.5	0	0	0	0	3.60411	1.29153	0	0	0	0	low
37	37	PC-5p-86811_20	ACTCCTTTGGATCTCAACCATTGA	24	xpSc0057785	+	912	1024	ttttagaaaaatgctgggaccctcagcACTCCTTTGGATCTCAACCATTGAtgtatgtgtggagcccacaccatcAATGGTTGAGATCCAAAGGGGGTTGtgggggttcccaa	5'	New	gp4	..............(((((((((((((.(((((((((((((((((((((((((...((((((...)))))))))))))))))))))))))))))))))..))))))).)))).	98	48.7	-70.4	1.3	3.5	5	0	0	1.5	0	3.60411	4.30509	0	0	1.49233	0	low
37	38	PC-3p-224920_6	AATGGTTGAGATCCAAAGGGGGTTG	25	xpSc0057785	+	912	1024	ttttagaaaaatgctgggaccctcagcACTCCTTTGGATCTCAACCATTGAtgtatgtgtggagcccacaccatcAATGGTTGAGATCCAAAGGGGGTTGtgggggttcccaa	3'	New	gp4	..............(((((((((((((.(((((((((((((((((((((((((...((((((...)))))))))))))))))))))))))))))))))..))))))).)))).	98	48.7	-70.4	1.3	0	3	0	3	0	0	0	2.58306	0	3.89112	0	0	low
38	37	PC-5p-86811_20	ACTCCTTTGGATCTCAACCATTGA	24	Sc0001310	-	353362	353508	aaaactctttattttttgggaccctacaACTCCTTTGGATCTCAATCATTGAtgatgtgggccccacacatacatgagtggatcccacacatacatcaataattgagattcaaaaagggttatgggggtccaaaaaaagagggtccc	5'	New	gp4	...(((((((.((((((((..(((((.(((((.(((((((((((((.(((((((.((((((..((((.((....)).))))..))))))....))))))).)))))))))))))..))))).)))))..)))))))))))))))...	141	41.5	-68.9	1.1	3.5	5	0	0	1.5	0	3.60411	4.30509	0	0	1.49233	0	low
39	39	PC-5p-89426_19	AATTCTTTGTCCCGGTTGCACTTC	24	Sc0000109	+	1404090	1404223	accgatactctttcaaatattatttgtgcAATTCTTTGTCCCGGTTGCACTTCaataagaagctgaaaggaggaaaaatgtgaAGTGCAACCGGGACAAAGAATTGCacaaataatatttgaaagagtatctct	5'	New	gp4	...(((((((((((((((((((((((((((((((((((((((((((((((((((........((....))..........)))))))))))))))))))))))))))))))))))))))))))))))))))...	128	35.8	-88.9	1.9	3	2.5	0	2	0	2	3.08924	2.15255	0	2.59408	0	1.57655	low
39	40	PC-3p-125600_13	AGTGCAACCGGGACAAAGAATTGC	24	Sc0000109	+	1404090	1404223	accgatactctttcaaatattatttgtgcAATTCTTTGTCCCGGTTGCACTTCaataagaagctgaaaggaggaaaaatgtgaAGTGCAACCGGGACAAAGAATTGCacaaataatatttgaaagagtatctct	3'	New	gp4	...(((((((((((((((((((((((((((((((((((((((((((((((((((........((....))..........)))))))))))))))))))))))))))))))))))))))))))))))))))...	128	35.8	-88.9	1.9	7	6	0	0	0	0	7.20823	5.16611	0	0	0	0	low
40	39	PC-5p-89426_19	AATTCTTTGTCCCGGTTGCACTTC	24	Sc0000109	-	1404142	1404275	agagatactctttcaaatattatttgtgcAATTCTTTGTCCCGGTTGCACTTCacatttttcctcctttcagcttcttattgaagtgcaaccgggacaaagaattgcacaaataatatttgaaagagtatcggt	5'	New	gp4	...(((((((((((((((((((((((((((((((((((((((((((((((((((........((......))........)))))))))))))))))))))))))))))))))))))))))))))))))))...	128	35.8	-85.6	1.8	3	2.5	0	2	0	2	3.08924	2.15255	0	2.59408	0	1.57655	low
41	41	PC-5p-59335_31	TGTCATGAAAATCATCTGCAC	21	xpSc0058448	+	2415	2519	aatttttatgaaaatTGTCATGAAAATCATCTGCACcgttagatcaggtatgtgtcttatgatccAACGGTGCAGATGATTTTCATGACaattttcatgaaacgt	5'	New	gp4	...(((((((((((((((((((((((((((((((((((((.(((((.............))))).)))))))))))))))))))))))))))))))))))))...	99	33.3	-62.7	1.8	10	7	3.5	0	0	1.5	10.2975	6.02713	3.75585	0	0	1.18241	middle
41	42	PC-3p-111585_15	AACGGTGCAGATGATTTTCATGAC	24	xpSc0058448	+	2415	2519	aatttttatgaaaatTGTCATGAAAATCATCTGCACcgttagatcaggtatgtgtcttatgatccAACGGTGCAGATGATTTTCATGACaattttcatgaaacgt	3'	New	gp4	...(((((((((((((((((((((((((((((((((((((.(((((.............))))).)))))))))))))))))))))))))))))))))))))...	99	33.3	-62.7	1.8	3	3	0	0	0	1.5	3.08924	2.58306	0	0	0	1.18241	low
42	42	PC-3p-111585_15	AACGGTGCAGATGATTTTCATGAC	24	Sc0003909	+	8763	8867	aattttcatgaaaactgtcatgaaaaccatctgcaccgttagatcaggtatgtgtctcatgatccAACGGTGCAGATGATTTTCATGACaattttcatgaaacgt	3'	New	gp4	...(((((((((((.(((((((((((.(((((((((((((.(((((((........)).))))).))))))))))))).))))))))))).)))))))))))...	99	37.1	-56.8	1.5	3	3	0	0	0	1.5	3.08924	2.58306	0	0	0	1.18241	low
43	43	PC-5p-325418_3	AAAAAGTGTGGCTCAAATGGTTCA	24	xfSc0000869	+	72027	72162	tttgagggacacAAAAAGTGTGGCTCAAATGGTTCAaaactgtcgaaacgacgtcgttttgcgtcgttttgcgcccaaaacgacgtcgttttgacagtTTTGAGCCATTTGAGCCACACTTtttgtggccctctac	5'	New	gp4	...(((((.((((((((((((((((((((((((((((((((((((((((((((((((((((.(.((.....))).)))))))))))))))))))))))))))))))))))))))))))))))))))).)))))...	130	46.3	-103.7	1.6	3	3	0	0	0	0	3.08924	2.58306	0	0	0	0	low
43	44	PC-3p-152270_10	TTTGAGCCATTTGAGCCACACTT	23	xfSc0000869	+	72027	72162	tttgagggacacAAAAAGTGTGGCTCAAATGGTTCAaaactgtcgaaacgacgtcgttttgcgtcgttttgcgcccaaaacgacgtcgttttgacagtTTTGAGCCATTTGAGCCACACTTtttgtggccctctac	3'	New	gp4	...(((((.((((((((((((((((((((((((((((((((((((((((((((((((((((.(.((.....))).)))))))))))))))))))))))))))))))))))))))))))))))))))).)))))...	130	46.3	-103.7	1.6	3	2	0	0	0	0	3.08924	1.72204	0	0	0	0	low
44	44	PC-3p-152270_10	TTTGAGCCATTTGAGCCACACTT	23	Sc0001432	+	118982	119164	agggggctttaaaagaaaaatgtttgagggccacaaaaagtatggctcaaatggctcaaaattgccaaaacgacgtcgttttgcgtcgttttacgttcaaaacgacgtcgttttgacaatTTTGAGCCATTTGAGCCACACTTtttgtggccctctgccattgctcgctttaaaatctctttt	3'	New	gp4	(((((..((((((.((..((((...((((((((((((((((.((((((((((((((((((((((.((((((((((((((((((...((.....))..)))))))))))))))))).)))))))))))))))))))))).))))))))))))))))...))))..))..))))))..)))))..	181	41.5	-111.8	1.5	3	2	0	0	0	0	3.08924	1.72204	0	0	0	0	low
45	45	PC-5p-100672_17	GGTCGCAGGAAAGATGGCACC	21	Sc0005276	-	57886	58058	aaaggaggaaaagaaagaaagaaaggagtggaaggggctctTGTCGCAGGAAAGATGGCACCtgctttgtgattttacccttcccaaaataaaggaagcgaagcaagCGCCATCTTCTCCTGTGACACGacaccctccaacttctttgctatttacatgcttctttctccatt	5'	New	gp4	...((((((((((..(((.((((((((((((.((((..((.((((((((((((((((((...(((((((..........(((((.........))))))))))))...)))))))).)))))))))).))..))))))).))))))).)).))).....))).)))))))...	167	45.1	-71.1	0.9	0	1.5	5.5	4.5	0	3	0	1.29153	5.90205	5.83668	0	2.36482	low
45	46	PC-3p-1321_1261	CGCCATCTTCTCCTGTGACACG	22	Sc0005276	-	57886	58058	aaaggaggaaaagaaagaaagaaaggagtggaaggggctctTGTCGCAGGAAAGATGGCACCtgctttgtgattttacccttcccaaaataaaggaagcgaagcaagCGCCATCTTCTCCTGTGACACGacaccctccaacttctttgctatttacatgcttctttctccatt	3'	New	gp4	...((((((((((..(((.((((((((((((.((((..((.((((((((((((((((((...(((((((..........(((((.........))))))))))))...)))))))).)))))))))).))..))))))).))))))).)).))).....))).)))))))...	167	45.1	-71.1	0.9	77	26	48	231	266	782	79.2905	22.3865	51.5088	299.616	264.64	616.43	middle
46	47	PC-5p-140695_11	AAGTGGTGTGTTGTATGGGTGAGA	24	xpSc0053264	+	376375	376540	actaaggatcttctagagtttttttttcctaaagttttttaAAGTGGTGTGTTGTATGGGTGAGAtttaatactaaaaaattgatgtgacttgtcattaaatctcaACCATACAACACACCACTCTAaaaaactttaggaaaaaaaaactgtagaggatccttgct	5'	New	gp4	..(((((((((((((.(((((((((((((((((((((((((.(((((((((((((((((.(((((((((((((...................)).))))))))))).))))))))))))))))).))))))))))))))))))))))))).)))))))))))))..	162	30.7	-95.2	1.9	0	2.5	1.5	0	0	1.5	0	2.15255	1.60965	0	0	1.18241	low
46	48	PC-3p-385328_3	ACCATACAACACACCACTCTA	21	xpSc0053264	+	376375	376540	actaaggatcttctagagtttttttttcctaaagttttttaAAGTGGTGTGTTGTATGGGTGAGAtttaatactaaaaaattgatgtgacttgtcattaaatctcaACCATACAACACACCACTCTAaaaaactttaggaaaaaaaaactgtagaggatccttgct	3'	New	gp4	..(((((((((((((.(((((((((((((((((((((((((.(((((((((((((((((.(((((((((((((...................)).))))))))))).))))))))))))))))).))))))))))))))))))))))))).)))))))))))))..	162	30.7	-95.2	1.9	0	3	0	0	0	0	0	2.58306	0	0	0	0	low
47	49	PC-5p-53018_35	TGATGTGTTGTATGGTTGAAA	21	Sc0001128	-	111985	112128	ctctagagttttttttttctaaagttttttagagTGATGTGTTGTATGGTTGAGAtttaatgacaagtcacatcaattttttagcattaaatctcacccatacaacacaccactttagaaaactttaaagaaaaaactctaaag	5'	New	gp4	...((((((((((((((..(((((((((((((((((.((((((((((((.((((((((((((..(((............)))..)))))))))))).)))))))))))).)))))))))))))))))))))))))))))))...	138	28.5	-67.6	1.6	3	4.5	0	2	4.5	3.5	3.08924	3.87458	0	2.59408	4.477	2.75896	low
48	49	PC-5p-53018_35	TGATGTGTTGTATGGTTGAAA	21	Sc0005665	+	66124	66222	tagagTGATGTGTTGTATGGTTGAAAtttaatgttctcgcacatcaaatcacgttaagatcttcattatggaatctcagccatacaatacatcacttta	5'	New	gp4	((((((((((((((((((((((((..((((((((................)))))))).(((.......)))...))))))))))))))))))))))))	99	33.3	-37.6	1.1	3	4.5	0	2	4.5	3.5	3.08924	3.87458	0	2.59408	4.477	2.75896	low
49	50	PC-5p-199742_7	ATTCTGTGGTTCAAATGGTCCGAA	24	xfSc0008207	+	2293	2442	gaaaatgtttggtggccacaaATTCTGTGGTTCAAATGGTCCGAAactgtcaaaacgatgtcattttggcttgttttgcacccaaaaggatgtcgttttgacaaTTTCGGACCATTTGAGCCACAGAAtttgtagccccctaacattgct	5'	New	gp4	...((((((.((.(((.(((((((((((((((((((((((((((((.(((((((((((..((.((((((..((.....)).)))))).))..))))))))))).))))))))))))))))))))))))))))).))).)).))))))...	144	42	-91.8	1.5	7	7	0	0	0	0	7.20823	6.02713	0	0	0	0	low
49	51	PC-3p-357650_3	TTTCGGACCATTTGAGCCACAGAA	24	xfSc0008207	+	2293	2442	gaaaatgtttggtggccacaaATTCTGTGGTTCAAATGGTCCGAAactgtcaaaacgatgtcattttggcttgttttgcacccaaaaggatgtcgttttgacaaTTTCGGACCATTTGAGCCACAGAAtttgtagccccctaacattgct	3'	New	gp4	...((((((.((.(((.(((((((((((((((((((((((((((((.(((((((((((..((.((((((..((.....)).)))))).))..))))))))))).))))))))))))))))))))))))))))).))).)).))))))...	144	42	-91.8	1.5	0	3	0	0	0	0	0	2.58306	0	0	0	0	low
50	52	PC-3p-31844_60	AATGGTGTAGATCAGTAAGGGGGT	24	Sc0000166	+	1012095	1012248	tagagaccccctttgtgaaggacccccacaaccccctttgtgatccacaccatttatgatgtggaccccacatatatatgagtgggccccacacatcatgAATGGTGTAGATCAGTAAGGGGGTtgtgggggtcctccacaaagggggtctgac	3'	New	gp4	...((((((((((((((.((((((((((((((((((((..(((((.(((((((((((((((((...(((((..........))))).....))))))))))))))))).)))))..)))))))))))))))))))).))))))))))))))...	148	52.6	-116.4	1.4	11	6	2.5	3.5	2.5	4.5	11.3272	5.16611	2.68275	4.53964	2.48722	3.54723	middle
51	52	PC-3p-31844_60	AATGGTGTAGATCAGTAAGGGGGT	24	Sc0002780	+	39969	40138	agcaatgatagagaccctctttgtggaggaccctcacaaccccctttgtgatccacaccattcatgatgtggactccacacatacatgagtggactccacacatcatgAATGGTGTAGATCAGTAAGGGGGTtgtgggggtcctccacaaagggggtctgactcattttt	3'	New	gp4	...(((((...(((((((((((((((((((((((((((((((((((..(((((.(((((((((((((((((((.(((((.((....)).))))).))))))..))))))))))))).)))))..)))))))))))))))))))))))))))))))))))...)))))...	164	49.4	-123.7	1.5	11	6	2.5	3.5	2.5	4.5	11.3272	5.16611	2.68275	4.53964	2.48722	3.54723	middle
52	53	PC-5p-16735_112	TCGTTGACCTATTCATCCACT	21	Sc0000001	-	362981	363159	agtagaacatgcttacaaaaaatcaaattaatcgaatgTCGTTGACCTATTCATCCACTacatttatattcattttaatactttaattcacaattattatttatttttatacgtacaaatgtgagtggatgaataagtaaacgatatccgattaacttgattttttgcaggcatattct	5'	New	gp4	...((((.((((((.(((((((((((.(((((((.((((((((.((.((((((((((((((((((.(((.......((((...((((........))))..)))).......))).)))))).)))))))))))).)).)))))))).))))))).))))))))))).)))))).))))	176	26.3	-63.6	1.3	14	16	15.5	3.5	6	9.5	14.4165	13.7763	16.6331	4.53964	5.96933	7.4886	middle
53	53	PC-5p-16735_112	TCGTTGACCTATTCATCCACT	21	Sc0000389	-	21374	21554	ccagtagagcatgcctgaaaaaaattaagctaattggataTCGTTGACCTATTCATCCACTcacatttgtattcattttaatattttaaatcacaattatttatttttgtagatataaatgtgagtggataaaaaggtaaacgatattcgattaatttgattttttgcaggcatgttctat	5'	New	gp4	...((((((((((((((.((((((((((..(((((((((((((((.((((.((.((((((((((((((((((..((...((((...(((.......)))..))))...))..)))))))))))))))))).)).)))).)))))))))))))))..)))))))))).))))))))))))))	178	27.6	-83.1	1.7	14	16	15.5	3.5	6	9.5	14.4165	13.7763	16.6331	4.53964	5.96933	7.4886	middle
54	54	PC-3p-11087_165	CTTAACATGTGTCTTAAGGGTACA	24	Sc0002398	-	314834	315005	ataaaatattatagattttgttaatgtgtgcccttaaggcacatgttaagatgttgaaaaatattgcatatcaccatgaaagtgagtgtattaaataatgcatgatgattttcaagctttCTTAACATGTGTCTTAAGGGTACAcgttaataagactcaaatattttatata	3'	New	gp4	((((((((((..((.((((((((((((((((((((((((((((((((((((.((((((((....(((((..((((((....))).))).........)))))......))))).)))..))))))))))))))))))))))))))))))))))))))..))))))))))...	169	27.3	-73.4	1.6	67.5	73.5	31.5	12.5	14.5	16	69.5079	63.2849	33.8027	16.213	14.4259	12.6124	middle
55	54	PC-3p-11087_165	CTTAACATGTGTCTTAAGGGTACA	24	xfSc0009766	-	1	172	ataaaatattgtagattttgttaatgtgtgcgcttaaggcacatgttaagatgctagaaaatattgcatatcaccgtgaaagtgggtgtattaaataatgcataatgatttttaagctttCTTAACATGTGTCTTAAGGGTATAcgttaacaagacataaatattttatata	3'	New	gp4	((((((((((.((..((((((((((((((((.(((((((((((((((((((.(((..(((((..(((((..((((.........)))).........))))).....)))))..)))..))))))))))))))))))).))))))))))))))))..))))))))))))...	169	27.9	-69.2	1.4	67.5	73.5	31.5	12.5	14.5	16	69.5079	63.2849	33.8027	16.213	14.4259	12.6124	middle
56	55	PC-5p-491887_3	ATAAGTGGGGGAGTGTTGACC	21	Sc0000581	-	543556	543701	aagggtcttggtatcaaaggagATAAGTGGGGGAGTGTTGAGCatttggccgcttttattgcatatactgcgacaaccaatatgcaataaaagcagccaaatgCTCAACACTCTCCCCACTTATCtcctttgataccaggaccaat	5'	New	gp4	...(((((((((((((((((((((((((((((((((((((((((((((((.(((((((((((((((.............))))))))))))))).)))))))))))))))))).)))))))))))))))))))))))))))))...	140	43.8	-111.6	1.7	0	0	0	0	0	3	0	0	0	0	0	2.36482	low
56	56	PC-3p-80451_22	CTCAACACTCTCCCCACTTATC	22	Sc0000581	-	543556	543701	aagggtcttggtatcaaaggagATAAGTGGGGGAGTGTTGAGCatttggccgcttttattgcatatactgcgacaaccaatatgcaataaaagcagccaaatgCTCAACACTCTCCCCACTTATCtcctttgataccaggaccaat	3'	New	gp4	...(((((((((((((((((((((((((((((((((((((((((((((((.(((((((((((((((.............))))))))))))))).)))))))))))))))))).)))))))))))))))))))))))))))))...	140	43.8	-111.6	1.7	6	4	0	3	7	38	6.17848	3.44407	0	3.89112	6.96422	29.9544	middle
57	57	PC-5p-100865_17	AGTGATTCACACCACTCATGATGT	24	Sc0000203	-	158009	158069	aaAGTGATTCACACAACTCATGATGTatgggacccacgtcatgagtggtgtgaatcatttt	5'	New	gp4	((((((((((((((.(((((((((((..((...))))))))))))).))))))))))))))	61	41	-33.4	1.3	5.5	1.5	0	0	0	1.5	5.66361	1.29153	0	0	0	1.18241	low
58	57	PC-5p-100865_17	AGTGATTCACACCACTCATGATGT	24	Sc0000682	-	383887	383995	ccccacaacccttaaAGTGATTCACACCACTCATGATGTagaacctcacatgtacatgagtagatcccacacatcatgaggggtatggattactttgagagttatgact	5'	New	gp4	...((.(((.((((((((((((((.(((.((((((((((.((..((((........))))....))....)))))))))).))).)))))))))))))).))).))...	103	43.1	-40.3	0.9	5.5	1.5	0	0	0	1.5	5.66361	1.29153	0	0	0	1.18241	low
59	58	PC-3p-187554_7	AATCCCTCTTTAAATCCCCCAACC	24	Sc0001138	+	384801	384958	atgctgtgtttggttaggggatttggggagggatttggaaagggaaattgaaaaggtaggtgaaatgtgaataaaatatgtatatatttcacatagtttcacacaccttttccctttccaAATCCCTCTTTAAATCCCCCAACCaaacacaccattaa	3'	New	gp4	(((.(((((((((((.((((((((..(((((((((((((((((((((......((((..((((((((((((................)))))))...)))))..)))))))))))))))))))))))))..)))))))).))))))))))).)))...	155	37.3	-86.8	1.5	3.5	1.5	0	0	4	0	3.60411	1.29153	0	0	3.97955	0	low
60	58	PC-3p-187554_7	AATCCCTCTTTAAATCCCCCAACC	24	Sc0002519	+	51419	51565	tggttgagggatttggagaggaatttggaaagggaaagggaaaaagtgtgaaactaggtaaaatgtaggtatattttattcacattttacttaactttttcctttccctttccatttccaAATCCCTCTTTAAATCCCCCAACCaaa	3'	New	gp4	((((((.(((((((..(((((.(((((((((.(((((((((((......(((..((((((((((((..(((.....)))..))))))))))))..)))....))))))))))).))))))))).)))))..))))))).))))))..	145	35.4	-74	1.4	3.5	1.5	0	0	4	0	3.60411	1.29153	0	0	3.97955	0	low
61	59	PC-5p-70408_26	ATAGTGTACGGACAAACTCTA	21	Sc0000838	-	287150	287297	aaacaaATAGTGTACGGACAAACTCTAttctcaaattacaataaaatcgtggttagctatcacatttttataaaagtgtggttgctaatcatgttttttacttagtgtaatttgagaataAAGTTTGTCCGTACACTATTTgtttaat	5'	New	gp4	((((((((((((((((((((((((.(((((((((((((((..((((.((((((((((.((((((((((....)))))))))).)))))))))).)))).......))))))))))))))).))))))))))))))))))))))))...	145	27.7	-80.5	2	14	6	9	0	4	6	14.4165	5.16611	9.6579	0	3.97955	4.72964	middle
61	60	PC-3p-22987_82	AAGTTTGTCCGTACACTATTT	21	Sc0000838	-	287150	287297	aaacaaATAGTGTACGGACAAACTCTAttctcaaattacaataaaatcgtggttagctatcacatttttataaaagtgtggttgctaatcatgttttttacttagtgtaatttgagaataAAGTTTGTCCGTACACTATTTgtttaat	3'	New	gp4	((((((((((((((((((((((((.(((((((((((((((..((((.((((((((((.((((((((((....)))))))))).)))))))))).)))).......))))))))))))))).))))))))))))))))))))))))...	145	27.7	-80.5	2	62	62	41	20.5	19.5	31.5	63.8443	53.3831	43.9971	26.5893	19.4003	24.8306	middle
62	61	PC-3p-80975_22	ATTTCTCTTTTCAAATCCCTCACC	24	Sc0000001	-	780777	780955	aatctttatgctgtgtttggttgggaaatttgaggagggatttggaaagggaaaaggaaaaggtgtgtgaaactaggtgaaatatagacatgttttactcacatttcgcctacttttttcATTTCTCTTTTCAAATCCCTCTCCaaatcccccaataaaacacaacattaaggattgat	3'	New	gp4	((((((((((.(((((((..(((((..(((((..((((((((((((((((((((.(((((((((..((((((...((((((((((....))))))))))....))))))..))))))))).))))))))))))))))))))..)))))..)))))..))))))).))).)))))))...	176	35.8	-83.3	1.3	4.5	2	0	1.5	0	3	4.63386	1.72204	0	1.94556	0	2.36482	low
63	61	PC-3p-80975_22	ATTTCTCTTTTCAAATCCCTCACC	24	Sc0000052	-	1393065	1393223	tggtgtgtttggttgggggatttagagagggatttagaaagggaaagggaaaaggtgtgtgaaactatgtgaaatattgacatgatttattcacatttcacctaccttttctATTTCTCTTTTCAAATCCCTCTCCaaatcccccaaccaaacacagta	3'	New	gp4	...((((((((((((((((((((.(((((((((((..(((((((((..((((((((..(((((...(((((((..(((.....)))...))))))))))))..))))))))..)))))))))..))))))))))).))))))))))))))))))))...	153	38.4	-91.3	1.5	4.5	2	0	1.5	0	3	4.63386	1.72204	0	1.94556	0	2.36482	low
64	62	PC-3p-15701_119	TCAAATCGCTCCTCAAATCTT	21	Sc0000360	-	813530	813675	ggacgtgtgtttggttgggggatttggaaagggatttagaaaagggaaagagaaaaagataggtgaacatttcacctagttttacacaccttttccctttctatttTCAAATCGCTCCTCAAATCTCccaaccaaacacaacggaa	3'	New	gp4	...((((((((((((((((((((((((..((.(((((.(((((..(((((.(((((...((((((((...))))))))((.....))...))))).)))))..)))))))))).))..)))))))))))))))))))))).))...	140	40.4	-66.2	1.1	30.5	44.5	19	17	15.5	33	31.4073	38.3153	20.3889	22.0497	15.4208	26.013	middle
65	62	PC-3p-15701_119	TCAAATCGCTCCTCAAATCTT	21	Sc0002981	+	268749	268902	gtgtttggttgggagatttgggaagggatttaaaaaagggaaagagaaaaagataggtaaaatgtgaataaaatatacctacatttcacttagttttacacaccttttccctttctatttTCAAATCGCTCCTCAAATCTTccaaccaaaccca	3'	New	gp4	..((((((((((((((((((((.((.(((((.((((..((((((.(((((......((((((((((((................)))))...))))))).....))))).)))))).)))).))))).)).))))))))))))))))))))...	149	34.4	-56.6	1.1	30.5	44.5	19	17	15.5	33	31.4073	38.3153	20.3889	22.0497	15.4208	26.013	middle
66	63	PC-5p-142847_11	TCCCACAATCCCCACAAATGAGGT	24	Sc0000330	+	970324	970474	aattcttcacaattttctcTCCCACAATCCCCACAAATGAGGTggcaagcaaaatttcagaagttgacccacactccaattggtatagaacttgcattatgtattgccacctCATTTGTGGGGATTGTGGGGGAGGaaattgtgtggatgg	5'	New	gp4	...((..((((((((((((((((((((((((((((((((((((((((((((.(((..(((...(((..(((.........)))..)))...))).))).))).)))))))))))))))))))))))))))))))))))))))))..))...	145	43	-83.7	1.3	2.5	3	0	0	0	0	2.57437	2.58306	0	0	0	0	low
66	64	PC-3p-395955_3	CATTTGTGGGGATTGTGGGGGAGG	24	Sc0000330	+	970324	970474	aattcttcacaattttctcTCCCACAATCCCCACAAATGAGGTggcaagcaaaatttcagaagttgacccacactccaattggtatagaacttgcattatgtattgccacctCATTTGTGGGGATTGTGGGGGAGGaaattgtgtggatgg	3'	New	gp4	...((..((((((((((((((((((((((((((((((((((((((((((((.(((..(((...(((..(((.........)))..)))...))).))).))).)))))))))))))))))))))))))))))))))))))))))..))...	145	43	-83.7	1.3	0	3	0	0	0	0	0	2.58306	0	0	0	0	low
67	65	PC-3p-148081_10	AGTTTTGAGCCATTTGAACCACTG	24	Sc0000199	-	116098	116237	aaaaatgtttgagggtcacaaaatcaatggctcaaatagctcaaaattgtcaaaacgacgtcgttttgcgcctaaaacgacatcgttttgatAGTTTTGAGCCATTTGAACCACTGattttatagccctctcccattgct	3'	New	gp4	...((((...((((((...(((((((.(((.((((((.((((((((((((((((((((.(((((((((....))))))))).)))))))))))))))))))).)))))).))).)))))))...))))))...))))...	134	38.6	-68.5	1.3	9	6	0	0	0	12	9.26772	5.16611	0	0	0	9.45929	low
68	65	PC-3p-148081_10	AGTTTTGAGCCATTTGAACCACTG	24	Sc0000670	-	288066	288222	ataggaaaatgtttgagggccacaaaatcagtggctcaaatggctcaaaactgccaaaacgacgtcgttttgtgttgttttgcacccaaaacgacgtcgttttaacAGTTTTGAGCCATTTGAACCACTGtttttgtggccctctagcattgccgtt	3'	New	gp4	...((..((((((.(((((((((((((.((((((.((((((((((((((((((..((((((((((((((((((((......))))..))))))))))))))))..)))))))))))))))))).)))))).))))))))))))).)))))).))...	151	43.3	-100.3	1.5	9	6	0	0	0	12	9.26772	5.16611	0	0	0	9.45929	low
69	66	PC-3p-31089_61	TTTGAGCCATTTGAGTCACC	20	Sc0003152	-	232160	232334	ggcagttaactatggaaaatgtttggtagctcaaaattttgtggctcaaatggctcaaatctgtcaaaacgacgtcgttttacactcaaaatctgtcaaaacgacgtcgttttgagtgaTTTGAGCCATTTGAGTCACAaaattttgaactacctagcattgttggttaactatt	3'	New	gp4	...(((((((((.....((((((.(((((.(((((((((((((((((((((((((((((((..(((((((((((((((((((((.........))).))))))))))))))))))..))))))))))))))))))))))))))))))).))))).))))))..)))))))))...	169	36.6	-100	1.6	0	0	0	8.5	11.5	10.5	0	0	0	11.0248	11.4412	8.27688	middle
70	66	PC-3p-31089_61	TTTGAGCCATTTGAGTCACC	20	xpSc0053603	-	157044	157167	actttaaaattttgtgatttaaatggcttaaatttgtcaaaataatattgttttatattcaaaatctgtcaaaacgacgtcgttttgagtgaTTTGAGCCATTTGAGTCACAaaattttgaatt	3'	New	gp4	..((((((((((((((((((((((((((((((((..((((((..(..((((((((((.........))).)))))))..)..))))))..))))))))))))))))))))))))))))))))..	120	25	-49.8	1.6	0	0	0	8.5	11.5	10.5	0	0	0	11.0248	11.4412	8.27688	middle
71	67	PC-3p-34021_56	TCTTGCGTCTGGGGTCAACAT	21	Sc0000998	+	504581	504779	attctcacgcttttcgctatacaggcatttgatgaatgcaattaatcatccaatcaagttgacgccagatgcaagatgcgagtataggctagaataacaccattctagcctatactcgcaTCTTGCATCTGGGGTCAACATgatcggatgattaatttcattcatcaaatgcctgtatagcgaaaagtgtgagaattaa	3'	New	gp4	((((((((((((((((((((((((((((((((((((((.((((((((((((.((((.((((((.(((((((((((((((((((((((((((((((......))))))))))))))))))))))))))))))).)))))).)))).)))))))))))).))))))))))))))))))))))))))))))))))))))...	196	39.2	-156.1	2	5.5	7	5.5	4	7.5	8	5.66361	6.02713	5.90205	5.18816	7.46166	6.30619	low
72	67	PC-3p-34021_56	TCTTGCGTCTGGGGTCAACAT	21	Sc0001217	-	456639	456822	gttatacaggcatttgatgaatgtaattaatcatccggtcatgttgacgccagatgcaagatgcaagtataggctagaatggtctttaacaagataatagacaactaacctatactcgaaTCTTGCGTCTGGCGTCAACATgatcggatgattaattgcattcatcaaatgcctgtataataaa	3'	New	gp4	((((((((((((((((((((((((((((((((((((((((((((((((((((((((((((((...((((((((.(((....(((((((......))).))))..))).))))))))...))))))))))))))))))))))))))))))))))))))))))))))))))))))))))))))...	181	37	-125.2	1.8	5.5	7	5.5	4	7.5	8	5.66361	6.02713	5.90205	5.18816	7.46166	6.30619	low
73	68	PC-5p-1646_1004	GGTGCAATGGGAGACGCCGAGT	22	xfSc0008996	-	1246	1349	ttagagacatggttgttagtGGTGCAATGAGAGACGCCGAGTtggctccgttatgggagtaaagtCCGGCGTCGTCATTGCACCACcgacagctatgccttgtt	5'	New	gp4	...(((.(((((((((..((((((((((((..(((((((..((.(((((......)))))..))..))))))).))))))))))))..))))))))).)))...	98	51.9	-60.7	1.1	132	91	99	206	305	737	135.927	78.3527	106.237	267.19	303.441	580.958	middle
73	69	PC-3p-23_113175	CCGGCGTCGTCATTGCACCAC	21	xfSc0008996	-	1246	1349	ttagagacatggttgttagtGGTGCAATGAGAGACGCCGAGTtggctccgttatgggagtaaagtCCGGCGTCGTCATTGCACCACcgacagctatgccttgtt	3'	New	gp4	...(((.(((((((((..((((((((((((..(((((((..((.(((((......)))))..))..))))))).))))))))))))..))))))))).)))...	98	51.9	-60.7	1.1	11640	13772	12447	20464	26004	42539	11986.3	11857.9	13356.9	26542.6	25871.1	33532.4	high
74	70	PC-5p-811_2196	CTTCGCAGAAGAGATGACACTT	22	xfSc0000062	-	392163	392254	gttgtgggactctCTTCGCAGAAGAGATGACACTTggtttgggatagcaacgtgaacCAAGTGTCAATCTTCTGCGATGAGatacccacttc	5'	New	gp4	...(((((..((((.((((((((((..(((((((((((((.............))))))))))))).)))))))))).))))..)))))...	86	47.8	-50.9	1.2	147	124	146	622	1108	1154	151.373	106.766	156.673	806.758	1102.34	909.668	middle
74	71	PC-3p-12272_150	CAAGTGTCAATCTTCTGCGATGAG	24	xfSc0000062	-	392163	392254	gttgtgggactctCTTCGCAGAAGAGATGACACTTggtttgggatagcaacgtgaacCAAGTGTCAATCTTCTGCGATGAGatacccacttc	3'	New	gp4	...(((((..((((.((((((((((..(((((((((((((.............))))))))))))).)))))))))).))))..)))))...	86	47.8	-50.9	1.2	36	25	26	114	201	210	37.0709	21.5255	27.9006	147.862	199.973	165.538	middle
75	72	PC-5p-237900_5	CGAGGAGTTGAGTCCCGATAAAGT	24	Sc0000152	+	1218417	1218638	tcacggcacatttggtctcaaactgttcatggtcattcacatagtaaaaaatgggatccaagttccgtcatttcaccttttCGAGGAGTTGAGTCCCGATAAAGTggggctcatggttttGTTTTGTCGGGACTCACCTCCTCAagaaagtggaaaggtgggacattaggccccactttttctttgtagcccgatctagttgggaccaaaattgacgtggtg	5'	New	gp4	(((((.((..(((((((((.(((((.((..(((.....(((.((.(((((.((((..(.(((((((..(.((((((.((((.((((((.(((((((((((((((..(..(.....)..)..))))))))))))))).)))))).)))).)))))).)..))))).)).)..)))).))))))).))).))).))..))))))))))))))..)).)))))..	220	45.9	-96	0.9	5	3	4	0	0	0	5.14874	2.58306	4.2924	0	0	0	low
75	73	PC-3p-47867_39	GTTTTGTCGGGACTCACCTCTTCA	24	Sc0000152	+	1218417	1218638	tcacggcacatttggtctcaaactgttcatggtcattcacatagtaaaaaatgggatccaagttccgtcatttcaccttttCGAGGAGTTGAGTCCCGATAAAGTggggctcatggttttGTTTTGTCGGGACTCACCTCCTCAagaaagtggaaaggtgggacattaggccccactttttctttgtagcccgatctagttgggaccaaaattgacgtggtg	3'	New	gp4	(((((.((..(((((((((.(((((.((..(((.....(((.((.(((((.((((..(.(((((((..(.((((((.((((.((((((.(((((((((((((((..(..(.....)..)..))))))))))))))).)))))).)))).)))))).)..))))).)).)..)))).))))))).))).))).))..))))))))))))))..)).)))))..	220	45.9	-96	0.9	63	26	23	0	0	8	64.8741	22.3865	24.6813	0	0	6.30619	middle
76	74	PC-3p-201933_7	ATTTTGAACCATTGTGGCCACAAA	24	Sc0003205	-	164780	164897	gaaaatgtttgagcgccataatttttgtggccacaatggctcaaaactgtcaaaacgacgtcgttttggcaATTTTGAACCATTGTGGCCACAAAaattatgaccctcttgcattgtt	3'	New	gp4	...(((((..(((...(((((((((((((((((((((((.((((((.((((((((((....)))))))))).)))))).)))))))))))))))))))))))...)))..)))))...	112	39.8	-66.1	1.4	3.5	0	0	0	0	3	3.60411	0	0	0	0	2.36482	low
77	74	PC-3p-201933_7	ATTTTGAACCATTGTGGCCACAAA	24	Sc0006545	+	35658	35793	ctagaggatcacaatttttgtggccacaatggctcaaaactgtcaaaacgacgtcgttttgacatgttttgcaccaaaaacgacgtcgttttgataATTTTGAACCATTGTGGCCACAAAaattgtggccctcaaa	3'	New	gp4	...((((..(((((((((((((((((((((((.((((((.((((((((((((((((((((....((.....))...)))))))))))))))))))).)))))).)))))))))))))))))))))))..))))...	130	40.4	-86.5	1.6	3.5	0	0	0	0	3	3.60411	0	0	0	0	2.36482	low
78	75	PC-5p-227724_6	AGTTTCCTAGAGTGGTGTGTTGTA	24	Sc0001651	+	338103	338270	gagtaaggatcctctagagtttttttttcctaaAGTTTCCTAGAGTGGTGTGTTGTAtggttgagatttaatgacaagtcacatcaattttttagcattaaatctcACCCATACAACACACCACTTTAGGaaactttaggaaaaaaaaactctagaggatccttggtg	5'	New	gp4	...(((((((((((((((((((((((((((((((((((((((((((((((((((((((((.((((((((((((..(((............)))..)))))))))))).)))))))))))))))))))))))))))))))))))))))))))))))))))))))))...	162	35.1	-113.6	1.9	1.5	1.5	0	0	0	0	1.54462	1.29153	0	0	0	0	low
78	76	PC-3p-238137_5	ACCCATACAACACACCACTTTAGG	24	Sc0001651	+	338103	338270	gagtaaggatcctctagagtttttttttcctaaAGTTTCCTAGAGTGGTGTGTTGTAtggttgagatttaatgacaagtcacatcaattttttagcattaaatctcACCCATACAACACACCACTTTAGGaaactttaggaaaaaaaaactctagaggatccttggtg	3'	New	gp4	...(((((((((((((((((((((((((((((((((((((((((((((((((((((((((.((((((((((((..(((............)))..)))))))))))).)))))))))))))))))))))))))))))))))))))))))))))))))))))))))...	162	35.1	-113.6	1.9	2.5	0	0	0	0	0	2.57437	0	0	0	0	0	low
79	77	PC-3p-75320_24	AATCCCTCCTTAAATCCTTCAACC	24	Sc0005190	+	50041	50193	tgtttggttgagggatttggggaaggatttggaaaaggaaagggaaaagatgtgtgaaactaggtgaaatgtaggtatattttattcacattgcacctaacttttctgtttccttttccaAATCCCTCCTTAAATCCTTCAACCaaacacagc	3'	New	gp4	((((((((((((((((((..(((.(((((((((((((((((..((((((..((.....))((((((.(((((..(((.....)))..))))).)))))).))))))..))))))))))))))))).)))..))))))))))))))))))....	149	37.9	-82.7	1.4	15.5	10.5	2.5	0	0	3	15.9611	9.04069	2.68275	0	0	2.36482	middle
80	77	PC-3p-75320_24	AATCCCTCCTTAAATCCTTCAACC	24	xfSc0001162	+	41083	41233	agtttggttgagggattttgggaaggatttggaaaaagaaagggaaaaggtgtgtaaaattaggtgaaatgtaggtatattttattcacatttcacctaacttttctctttccctttctaAATCCCTCCTTAAATCCTTCAACCaaacaca	3'	New	gp4	.(((((((((((((((((..(((.(((((((((((..((((((((((((..........(((((((((((((..(((.....)))..)))))))))))))))))))))))))..))))))))))).)))..)))))))))))))))))...	147	34.4	-79.8	1.5	15.5	10.5	2.5	0	0	3	15.9611	9.04069	2.68275	0	0	2.36482	middle
81	78	PC-5p-51854_36	ATTATGTGGTTGAGATTTATTGGC	24	Sc0000132	+	526411	526593	acacgagcaaggatcctctagagtgattttttcctaaagtttcctagagtgttacATTATGTGGTTGAGATTTATTGGCaagtcacatcaatttttctgatgtgacttgccagtaaatctgaaccacacaatataacactctaggaaactttaggaaaatttcactctagaggatccttggtg	5'	New	gp4	.(((...(((((((((((((((((((..((((((((((((((((((((((((((.(((.(((((((.(((((((((((((((((((((((.......))))))))))))))))))))))).))))))).))).))))))))))))))))))))))))))..))))))))))))))))))))))	182	37.2	-131.5	1.9	11.5	7.5	2	0	1.5	1.5	11.8421	6.45764	2.1462	0	1.49233	1.18241	middle
82	78	PC-5p-51854_36	ATTATGTGGTTGAGATTTATTGGC	24	Sc0001373	+	357855	358027	aaatttccttaaagtttcctaaagtgctacATTATGTGGTTGAGATTTATTGGCaagtcacatcaattttttttgatgtgacttgccaataaatctcaaccacatttttgatgtgacttgccaataaatctcaaccacataatgtagcactctaggaaactttaaagaaaaat	5'	New	gp4	...((((.(((((((((((((.((((((((((((((((((((((((((((((((((((((((((((........((((((....................)))))).)))))))))))))))))))))))))))))))))))))))))))).))))))))))))).))))...	167	31.2	-98.5	1.8	11.5	7.5	2	0	1.5	1.5	11.8421	6.45764	2.1462	0	1.49233	1.18241	middle
83	79	PC-5p-95363_18	ACCCACCATTTTTGAATACATACC	24	Sc0001860	-	294795	294921	attctcatatactattatgatctattaaaACCCACCATTTTTGAATACATACCtatcacccacttggtAGGTATGTTTTCAAGAATGGTAGGtttcaataggtcagaataacagtgttcatgggtca	5'	New	gp4	...((((((((((.((((((((((((.(((((.((((((((((((.((((((((((((......)))))))))))).)))))))))))).))))).)))))))))...))).)))))..)))))...	121	33.9	-55.7	1.3	9	9	0	1.5	1.5	1.5	9.26772	7.74917	0	1.94556	1.49233	1.18241	low
83	80	PC-3p-312486_4	AGGTATGTTTTCAAGAATGGTAGG	24	Sc0001860	-	294795	294921	attctcatatactattatgatctattaaaACCCACCATTTTTGAATACATACCtatcacccacttggtAGGTATGTTTTCAAGAATGGTAGGtttcaataggtcagaataacagtgttcatgggtca	3'	New	gp4	...((((((((((.((((((((((((.(((((.((((((((((((.((((((((((((......)))))))))))).)))))))))))).))))).)))))))))...))).)))))..)))))...	121	33.9	-55.7	1.3	7.5	1.5	0	0	0	0	7.7231	1.29153	0	0	0	0	low
84	81	PC-3p-75810_24	CAACGCACCACTCTAGAAAAC	21	Sc0000915	-	148201	148368	caccaaggatcctctagagtgtttttttcctaaagtttcctaaagtggtgtattgtgtggttgagatttaatgctgaaaaattgatgtgacttgtcattaaatctcaaccacaCAATGCACCACTCTAGAAAACtttaggaaaaaaaaactctagaggatccttgctc	3'	New	gp4	...(((((((((((((((((.(((((((((((((((((.(((.(((((((((((((((((((((((((((((((...................).)))))))))))))))))))))))))))))).))).))))))))))))))))).)))))))))))))))))...	162	36.3	-104.6	1.7	4	0	3.5	1.5	3	0	4.11899	0	3.75585	1.94556	2.98467	0	low
85	81	PC-3p-75810_24	CAACGCACCACTCTAGAAAAC	21	Sc0004908	-	91581	91747	caccaaggatcctctagagtgttttttttctaaagtttcttaaagtggtgtattgtgtggttgagatttaatgttgaaaaattgatgtgacttgtcattaaatctcaaccacaCAATGCACCACTCTAGAAAACtttgaaaaaaaaaactctagaggatccttgctc	3'	New	gp4	...(((((((((((((((((.(((((((((.(((((((..((.((((((((((((((((((((((((((((((.......((....)).......)))))))))))))))))))))))))))))).))..)))))))))))))))).)))))))))))))))))...	161	34.1	-95.6	1.7	4	0	3.5	1.5	3	0	4.11899	0	3.75585	1.94556	2.98467	0	low
86	82	PC-5p-3224_513	AATCACTAACCCTCACGTGTGTGT	24	Sc0000067	-	504719	504862	tcttcttcttttttttttttttcttctccAATCACTAACCCTCACGTGTGTGTggggtagtaaaatgatatagactctcactacccctcaccccccacacaCACGTGGGAGTTAGTGATTGGagaaaaaaaaaattggggatta	5'	New	gp4	...((..(..((((((((.....((((((((((((((((.(((((((((((((((((((((..................)))))))).........))))))))))))).))))))))))))))))))))))))..)..))...	138	40.3	-67.1	1.2	295	281	119	43	48	91	303.775	241.946	127.699	55.7727	47.7546	71.7329	middle
86	83	PC-3p-4195_406	CACGTGGGAGTTAGTGATTGG	21	Sc0000067	-	504719	504862	tcttcttcttttttttttttttcttctccAATCACTAACCCTCACGTGTGTGTggggtagtaaaatgatatagactctcactacccctcaccccccacacaCACGTGGGAGTTAGTGATTGGagaaaaaaaaaattggggatta	3'	New	gp4	...((..(..((((((((.....((((((((((((((((.(((((((((((((((((((((..................)))))))).........))))))))))))).))))))))))))))))))))))))..)..))...	138	40.3	-67.1	1.2	92	81	60	67	85	87	94.7367	69.7425	64.386	86.9016	84.5655	68.5799	middle
87	84	PC-3p-143453_11	ATTTCGAGCCATTTGAGTCACAAA	24	Sc0000603	-	463375	463534	aaaaatgtttgagggccacaatttttgtggctcaaatggctcaaaattgtaaaaacgacgtcgttttgacaatttcgaaattgttttgtactcaaaacgacgtcgttttgacaATTTCGAGCCATTTGAGTCACAAAaattgtggccctcaaccattgtt	3'	New	gp4	...((((.((((((((((((((((((((((((((((((((((.(((((((.(((((((((((((((((((((((....)))))........)))))))))))))))))).))))))).)))))))))))))))))))))))))))))))))).))))...	154	36.9	-100.1	1.7	6	2	0	0	0	2	6.17848	1.72204	0	0	0	1.57655	low
88	84	PC-3p-143453_11	ATTTCGAGCCATTTGAGTCACAAA	24	Sc0004317	+	10407	10551	agcaatggttgagggctacgatttttgtggctcaaatggctcgaaattgccaaaacgacgtcgttttgagtacaaaatgacgtcgtttcattttaacaATTTCGAGCCATTTGAGTCACAAAaattgtggccctcaaacattttt	3'	New	gp4	...((((.(((((((((((((((((((((((((((((((((((((((((...((((((((((((((((....))))))))))))))))........))))))))))))))))))))))))))))))))))))))))).))))...	139	39.3	-92.5	1.6	6	2	0	0	0	2	6.17848	1.72204	0	0	0	1.57655	low
89	85	PC-5p-221552_6	CTTCTCACGAATGTTCGCAAC	21	Sc0001048	-	163601	163710	tttccgaaatcacagaCTTCTCACGAATGTTCGCAACtatagatgcggacataatgttatgtttgtatttatagaTGTGAACATTTGTGAGGGGTCggtgatttcggtga	5'	New	gp4	...((((((((((.(((..((((((((((((((((.((((((((((..(((((....)))))..)))))))))).))))))))))))))))..))).))))))))))...	104	39.1	-68.4	1.6	0	0	0	0	3	6	0	0	0	0	2.98467	4.72964	low
89	86	PC-3p-51202_37	TGTGAACATTTGTGAGGGGTC	21	Sc0001048	-	163601	163710	tttccgaaatcacagaCTTCTCACGAATGTTCGCAACtatagatgcggacataatgttatgtttgtatttatagaTGTGAACATTTGTGAGGGGTCggtgatttcggtga	3'	New	gp4	...((((((((((.(((..((((((((((((((((.((((((((((..(((((....)))))..)))))))))).))))))))))))))))..))).))))))))))...	104	39.1	-68.4	1.6	5	12	11	10	7	13	5.14874	10.3322	11.8041	12.9704	6.96422	10.2476	middle
90	87	PC-3p-104686_16	CATGTGCACTAAGGGCACACA	21	Sc0000073	+	991360	991485	cacgtgtgcccttcgggcacatattaagaagcttaaaagaattgtacattctacatgaaggtgagtgcaattaagaatgtacaatctttttaagcttatttaaCATGTGCACTAAGGGCACACAtt	3'	New	gp4	...((((((((((.((((((((.(((((((((((((((..((((((((((((...(((..((....))..)))))))))))))))..)))))))))).))))).)))))).))))))))))))...	120	36.5	-58.1	1.3	0	0	0	2	3.5	2.5	0	0	0	2.59408	3.48211	1.97069	low
91	87	PC-3p-104686_16	CATGTGCACTAAGGGCACACA	21	xfSc0000148	+	293306	293431	cacgtgtgcccttagggcacatattaagaagtttaaaagaagtgtacattctacatgaaggtgagtgcaattaagaatgtacaatctttttaagcttacttaaCATGTGCACTAAGGGCACACAtt	3'	New	gp4	...((((((((((((.((((((.((((((((((((((((...((((((((((...(((..((....))..)))))))))))))...))))))))))).))))).)))))).))))))))))))...	120	36.5	-59.7	1.3	0	0	0	2	3.5	2.5	0	0	0	2.59408	3.48211	1.97069	low
92	88	PC-5p-118238_14	GTTGTATGGTTGAGATTTAATGAC	24	Sc0000183	+	26049	26210	caaggatcctctagagttttttttccctaaagtttcctagagtggtgtGTTGTATGGTTGAGATTTAATGACaagtcacatcaattttttagcattaaatctcacccatacaacacaccactttaggaaactttaagaaaaaaaaactctagaggatccttg	5'	New	gp4	((((((((((((((((((((((((...((((((((((((((((((((((((((((((.((((((((((((..(((............)))..)))))))))))).))))))))))))))))))))))))))))))...))))))))))))))))))))))))	162	34.6	-102.3	1.8	2	6.5	0	0	0	1.5	2.05949	5.59662	0	0	0	1.18241	low
93	88	PC-5p-118238_14	GTTGTATGGTTGAGATTTAATGAC	24	Sc0000712	+	726234	726433	ttggacacagggttgagcaaggatcctctagagttttttttttcctacagtttcctagagtagtgtGTTGTATGGTTGAGATTTAATGACaagtcacatcaattttttagcattaaatctcacccatacaacacaccactttaggaaactctaggaaaaaaaaactctagaggatccttggtgcacagggttgtgttaag	5'	New	gp4	...(((((((..(((.((((((((((((((((((((((((((.((((.(((((((((((((.(((((((((((((.((((((((((((..(((............)))..)))))))))))).))))))))))))).))))))))))))).)))))))))))))))))))))))))))...))).)))..)))))))...	194	38	-110.9	1.5	2	6.5	0	0	0	1.5	2.05949	5.59662	0	0	0	1.18241	low
94	89	PC-3p-98068_17	AATCCTTTCTCAAATCCCCCAACC	24	Sc0000922	+	605550	605701	tgtttggttgggagatttgggaaggaatttgaaaaaaggaagggaaaaggtgtgtgaaactaggtgaaatgtaagtatatttcattcacatttcacatttctttttcatttccctttccaAATCCTTTCTCAAATCCCCCAACCaaacacag	3'	New	gp4	((((((((((((.((((((((((((.(((((.(((..((((((((((((..((((((((....(((((((((....))))))))).....))))))))..))))))).))))).))).))))).)))))))))))).))))))))))))...	149	36.2	-68.1	1.2	4	4	0	0	1.5	2.5	4.11899	3.44407	0	0	1.49233	1.97069	low
95	89	PC-3p-98068_17	AATCCTTTCTCAAATCCCCCAACC	24	Sc0003681	+	34642	34794	gacgctgtgtttggttgggagatttagaaagggatttgaaaaggaaaagggaaaagatgtctgaaattagatgaaatttagatatatttcacctattttttgtcattttctttttcaAATCCTTTCTCAAATCCCCCAACCaaacagagtata	3'	New	gp4	...(((.((((((((((((.((((((((((.((((((((((((((((((..((((((((..((((((((..(((...)))..)).))))))..))))))))..).)))))))))))))))))))))).))))).)))))))))))).)))...	147	32.7	-64	1.3	4	4	0	0	1.5	2.5	4.11899	3.44407	0	0	1.49233	1.97069	low
96	90	PC-3p-51911_36	AATGGTCACAAAGCTTTCATGATT	24	Sc0004784	-	55098	55259	aaagttagggatcatgaaaattttttcatgaaaataatcataaagatttatgatccttggattaccttgattagtgtatggtgctttattttaagtgtaatctAATGGTCACAAAGCTTTCATGATTatttttatgaaaggtttttcatgatacctaacatt	3'	New	gp4	...((((((.((((((((((..(((((((((((((((((((((((.(((.(((((.((((((((((((((..(((.......))).....))))).))))))))).))))).))).)))).)))))))))))))))))))..)))))))))).))))))...	156	26.5	-64.4	1.5	4.5	5	2	1.5	0	5	4.63386	4.30509	2.1462	1.94556	0	3.94137	low
97	90	PC-3p-51911_36	AATGGTCACAAAGCTTTCATGATT	24	xpSc0053422	+	9846	10026	ccagagaaaagttagggatcataaaaattttttcatgaaaataatcatgaaagatttatgattcttggattaccttgattagtgtgtgttgttttatcctaagtgaaattcAATGGTCACAAAGCTTTCATGATTattttcatgaaatatttttcatgatacctagcattgctttctcctc	3'	New	gp4	...((((((.((((((.(((((((((((..(((((((((((((((((((((((.(((.((((..(((((((.......((((..((........))..))))....)))))))..)))).))).))))))))))))))))))))))).)))))).))))).)))))).....))))))...	175	29.3	-61.8	1.2	4.5	5	2	1.5	0	5	4.63386	4.30509	2.1462	1.94556	0	3.94137	low
98	91	PC-3p-54785_34	AATCCCTCTTCAAATCCTCCTACC	24	Sc0000206	-	705072	705223	tgtttggttgggggatttggagagggatttggaaaggaaaagggaaaaggtgtgtgaaactaggtgaaatgaaggcatattttattcccatttcacctaacttttccctttccttttccaAATCCCTCCTCAAATCCTCCTACCaaacacag	3'	New	gp4	((((((((.((((((((((..((((((((((((((((.(((((((((((..((.....)).((((((((((..((.(((...))).))))))))))))..))))))))))).))))))))))))))))..)))))))))).))))))))...	149	41.4	-86.1	1.4	6.5	3	3	0	0	4.5	6.69336	2.58306	3.2193	0	0	3.54723	low
99	91	PC-3p-54785_34	AATCCCTCTTCAAATCCTCCTACC	24	xfSc0000311	-	18961	19111	tgtttggttggaggatttggagagggatttggaaagggaaagggaaaaggtgtgtgaaactaggtgaaatgtaggcatattttattcccattccacctaacttttccctttccttttccaAATCCCTCCTCAAATCCTCCTACCaaacaca	3'	New	gp4	((((((((.((((((((((..((((((((((((((((((((((((((((..(((.(((.....(((((((((....))))))))).....))))))....))))))))))))))))))))))))))))..)))))))))).))))))))..	149	41.7	-89.7	1.4	6.5	3	3	0	0	4.5	6.69336	2.58306	3.2193	0	0	3.54723	low
100	92	PC-5p-106667_16	ACGATGCCCAATCTGATCTTTTGC	24	Sc0004344	+	51084	51226	gctccataatagcaacacgACGATGCCCAATCTGATCTTTTGCctcctctaggaggtcattcttttcctaggaggtcattcttttgagcttatagaggaggcAAAAGATCAGATTGGGCATCGTCGtgttgctattatggagc	5'	New	gp4	(((((((((((((((((((((((((((((((((((((((((((((((((((..((.(((.......((.....)).........))).))..)))))))))))))))))))))))))))))))))))))))))))))))))))	143	45.5	-108.1	1.7	7	3	0	0	0	0	7.20823	2.58306	0	0	0	0	low
100	93	PC-3p-41413_46	AAAAGATCAGATTGGGCATCGTCG	24	Sc0004344	+	51084	51226	gctccataatagcaacacgACGATGCCCAATCTGATCTTTTGCctcctctaggaggtcattcttttcctaggaggtcattcttttgagcttatagaggaggcAAAAGATCAGATTGGGCATCGTCGtgttgctattatggagc	3'	New	gp4	(((((((((((((((((((((((((((((((((((((((((((((((((((..((.(((.......((.....)).........))).))..)))))))))))))))))))))))))))))))))))))))))))))))))))	143	45.5	-108.1	1.7	13	15.5	5	4	4	6	13.3867	13.3458	5.3655	5.18816	3.97955	4.72964	middle
101	94	PC-5p-64694_28	ATTGGCCTTTAACCCAATCCAACT	24	Sc0000007	+	2031967	2032062	acatatggttagtctttgATTGGCCTTTAACCCAATCCAACTtggatgtgcctaggTTGGATTGGGTTAAAGATCAGtcaaattctaaccataaga	5'	New	gp4	...(((((((((..((((((((..(((((((((((((((((((((......)))))))))))))))))))))..))))))))..)))))))))...	90	38.5	-57.6	1.6	13	16	0	0	0	5	13.3867	13.7763	0	0	0	3.94137	middle
101	95	PC-3p-142558_11	TTGGATTGGGTTAAAGGTCAG	21	Sc0000007	+	2031967	2032062	acatatggttagtctttgATTGGCCTTTAACCCAATCCAACTtggatgtgcctaggTTGGATTGGGTTAAAGATCAGtcaaattctaaccataaga	3'	New	gp4	...(((((((((..((((((((..(((((((((((((((((((((......)))))))))))))))))))))..))))))))..)))))))))...	90	38.5	-57.6	1.6	3	13	0	0	0	7	3.08924	11.1932	0	0	0	5.51792	middle
102	96	PC-5p-91129_19	TTCTAGAGTGGTGCGTTGTAT	21	Sc0000038	-	1218679	1218840	gtcaggatcctagagtattttttttctaaaattTTCTAGAGTGGTGCATTGTATggttgagatttaatgacaagtcacatcaattttttaacattaaatctcaaccacacaatacaccactttaaaaaactttagacaaaaaatactctagaggatccttgg	5'	New	gp4	...((((((((((((((((((((.((((((.((((.((((((((((.(((((.((((((((((((((((......................)))))))))))))))).))))).)))))))))).)))).)))))).))))))))))))..))))))))...	156	30.9	-74.2	1.5	0	0	1.5	3	1.5	3.5	0	0	1.60965	3.89112	1.49233	2.75896	low
103	96	PC-5p-91129_19	TTCTAGAGTGGTGCGTTGTAT	21	xpSc0054491	-	22846	22989	tctagagtttttttttcctaatgttTTCTAGAGTGGTGCATTGTATggttgagatttaatgacaagtcacatcaatttttcagcattaaatctcaaccacacaatacaccactttagaaaattttaggaaaaaaacactcttag	5'	New	gp4	...(((((.((((((((((((..(((((((((((((((.(((((.((((((((((((((((..(((...........)))...)))))))))))))))).))))).)))))))))))))))..)))))))))))).)))))...	138	30.6	-69.2	1.6	0	0	1.5	3	1.5	3.5	0	0	1.60965	3.89112	1.49233	2.75896	low
104	97	PC-3p-120334_13	AAATCTCTTTTCAAATCTCCCAAC	24	Sc0000997	+	172625	172754	gctgtatttggttgggggatttggaaagggatttggaaagggaaaaggtaggtcatatttcaccaaatttcacatactttttccctttctctttccAAATCTCTTTTCAAATCTCCCAACcaaacacaaa	3'	New	gp4	..(((.((((((((((((((((((((((((((((((((((((((((((((.((...((((....))))...)).))))))))))))......)))))))))))))))))))))))))))))))).)))..	126	37.7	-67.8	1.4	7.5	6.5	1.5	0	0	3	7.7231	5.59662	1.60965	0	0	2.36482	low
105	97	PC-3p-120334_13	AAATCTCTTTTCAAATCTCCCAAC	24	xfSc0000906	-	24434	24587	gtgtttggttaggggatttgagaagagatttggaaatagaaagggaaaaggtgtgtgaaactaagtaaaatataaacatgttttattcacattttacccatttttttcatttttctttccAAATCTCTTTTCAAATCTCCCAACcaaacacaac	3'	New	gp4	((((((((((.(((((((((((((((((((((((((.(((((.((((((..((.((((((...((((((((((....))))))))))....)))))).))..)))))).))))).))))))))))))))))))))))))).))))))))))...	151	31.2	-73.9	1.5	7.5	6.5	1.5	0	0	3	7.7231	5.59662	1.60965	0	0	2.36482	low
106	98	PC-5p-114520_14	TGAGGGATTTGCTGAGGGAAA	21	Sc0002191	-	90022	90155	gcaaggacttgaTGAGGGATTTGCTGAGGGAAAggaaataggagggaaaaagtggacaaaatagaagtctactttttgttacatttctctttttcttttctTTTTCCTCCGCAAATTCCTCCtcaaatcctaaa	5'	New	gp4	...((((.((((.(((((((((((.(((((((((((((.(..(((((((((((((((.........)))))))).........)))))))..)...))))))))))))).))))))))))).)))).))))...	128	37.3	-58.3	1.2	4	4	0	3	6	4	4.11899	3.44407	0	3.89112	5.96933	3.1531	low
106	99	PC-3p-6248_282	TTTTCCTCCGCAAATTCCTCC	21	Sc0002191	-	90022	90155	gcaaggacttgaTGAGGGATTTGCTGAGGGAAAggaaataggagggaaaaagtggacaaaatagaagtctactttttgttacatttctctttttcttttctTTTTCCTCCGCAAATTCCTCCtcaaatcctaaa	3'	New	gp4	...((((.((((.(((((((((((.(((((((((((((.(..(((((((((((((((.........)))))))).........)))))))..)...))))))))))))).))))))))))).)))).))))...	128	37.3	-58.3	1.2	91.5	88	81.5	76	80	210.5	94.2219	75.7696	87.4577	98.575	79.5911	165.932	middle
107	100	PC-5p-3429_481	AAGAGCTCTGATACCATGTTGAAT	24	Sc0000170	-	1113319	1113476	aaggggatcaaatttacatggagagacttgaactcaagacctcttagaaccAAGAGCTCTGATACCATGTTGAATtattaacatAATTTAATATGATATCAGAGCCTTtggtttcaagagttactgagttcaagcctcatgatatgtttgttcctttg	5'	New	gp4	(((((((.(((....(((((..(((.((((((((((....(((((..((((((..(((((((((.(((((((((((((....))))))))))))).)))))))))..))))))..)))))....)))))))))).)))....))))))))))))))).	157	35.4	-69.6	1.2	221	257	96	18	39	23	227.574	221.282	103.018	23.3467	38.8006	18.1303	middle
107	101	PC-3p-46779_40	AATTTAACATGATATCAGAGCCTT	24	Sc0000170	-	1113319	1113476	aaggggatcaaatttacatggagagacttgaactcaagacctcttagaaccAAGAGCTCTGATACCATGTTGAATtattaacatAATTTAATATGATATCAGAGCCTTtggtttcaagagttactgagttcaagcctcatgatatgtttgttcctttg	3'	New	gp4	(((((((.(((....(((((..(((.((((((((((....(((((..((((((..(((((((((.(((((((((((((....))))))))))))).)))))))))..))))))..)))))....)))))))))).)))....))))))))))))))).	157	35.4	-69.6	1.2	16	25	8	0	0	0	16.476	21.5255	8.5848	0	0	0	middle
108	102	PC-5p-72099_25	ACAATCCCCTTTGTGATCCACACC	24	Sc0000000	+	907594	907762	gcaatgatagggaccccctttgtggaggacccccACAATCCCCTTTGTGATCCACACCatttatgatgtggaccccatatatatatgagtggaccccacacatcatgaatggtgtagatcgataaggaggttgtgggggtcctccacaaaagggggtctaactcatttt	5'	New	gp4	..(((((...((((((((((((((((((((((((((((((.((((..(((((.(((((((((((((((((....((((..........))))......))))))))))))))))).)))))..)))).)))))))))))))))))))))).))))))))...)))))..	165	48.5	-107.2	1.3	5	2.5	0	1.5	0	3.5	5.14874	2.15255	0	1.94556	0	2.75896	low
109	102	PC-5p-72099_25	ACAATCCCCTTTGTGATCCACACC	24	xpSc0053242	+	309921	310106	tcagatacagtaatgatagagaccccctttgtggaggacccccACAATCCCCTTTGTGATCCACACCactcatgatgtggaccccacacatacataagtgggccccacacatcatgaatggtgtagatcagtaagggggttatgggggtcctctacaaagggggtctgactcatttttctttcaga	5'	New	gp4	...((......(((((...(((((((((((((((((((((((((.(((((((((..(((((.((((((.((((((((((...(((((..........))))).....)))))))))).)))))).)))))..))))))))).)))))))))))))))))))))))))...)))))......))...	180	48.9	-114.6	1.3	5	2.5	0	1.5	0	3.5	5.14874	2.15255	0	1.94556	0	2.75896	low
110	103	PC-3p-114799_14	ATTTGAGCCATTTGAATCACAAAA	24	Sc0003297	+	110615	110796	ggtattattttaatacgacaatgttaggtagctcaaaattttgtggttcaaatggctcaaatctgtcaaaacgacgtcgttttgatagattttgagtgtaaaacgaggtcgttttgacagATTTGAGCCATTTGAATCACAAAAgtttgagttaccaaacattttttattttaataatgtgt	3'	New	gp4	..(((((((..((((..(.((((((.(((((((((((.(((((((((((((((((((((((((((((((((((((.((((((((..............)))))))).))))))))))))))))))))))))))))))))))))).))))))))))).)))))))..))))..)))))))...	177	31.3	-96.6	1.7	7	3	0	0	0	0	7.20823	2.58306	0	0	0	0	low
111	103	PC-3p-114799_14	ATTTGAGCCATTTGAATCACAAAA	24	Sc0005246	+	24831	24980	aacaatgttaggtaacttaaaattttgtgcctcaaatggctcaaatcacttaaaatgacgtcgttttgacagattttaagtgtaaaacaacgtcgttttgacaaATTTGAGCCATTTGAATCACAAAAttttgagctaccaaacattttt	3'	New	gp4	...((((((.((((.((((((((((((((..(((((((((((((((...((((((((((((.((((((((.........)).)))))).))))))))))))...)))))))))))))))..)))))))))))))).)))).))))))...	144	30.7	-66.3	1.4	7	3	0	0	0	0	7.20823	2.58306	0	0	0	0	low
112	104	PC-5p-11209_163	CGTGATGTTGGTCCGGCTCATT	22	Sc0002548	-	43839	43947	atttatggagaagtagacatggCGTGATGTTGGTCCGGCTCATTtctttcttgttaaaagttttgagacgagccgaatcaatatcactcttgtacacttctttatgcaa	5'	New	gp4	...(((..((((((..(((.((.(((((((((((.((((((.((((...(((.....)))....)))).)))))).))))))))))).)))))..))))))..)))...	103	38.5	-44.4	1.1	34.5	24	22	5.5	6	7	35.5263	20.6644	23.6082	7.13372	5.96933	5.51792	middle
113	104	PC-5p-11209_163	CGTGATGTTGGTCCGGCTCATT	22	Sc0002548	-	47395	47503	atttatggagaagtagacatggCGTGATGTTGGTCCGGCTCATTtctttcttgttaaaagttttgagacgagccgaatcaatatcactcttgtatacttctttatgcaa	5'	New	gp4	...(((..(((((((.(((.((.(((((((((((.((((((.((((...(((.....)))....)))).)))))).))))))))))).))))).)))))))..)))...	103	37.6	-45.7	1.1	34.5	24	22	5.5	6	7	35.5263	20.6644	23.6082	7.13372	5.96933	5.51792	middle
114	105	PC-5p-6870_258	CACAGTCCCCTTTGGATCTCA	21	xfSc0000065	-	139145	139352	tcaacctgcaccaaaactttctttttttaaagcaacaatgattaagactccctttttctgaaaacctcCACAATCCCCTTTGGATCTCAaccattgatggtgtgggccccacacatacatcaatggttgagatccaaaggaagttgtagaggtctaaaaaaaaaaaagtcccaagcatttttctttctaaagtcatggattaggtcaa	5'	New	gp4	...(((((..(((..(((((........((((.((.((((.....((((...(((((......(((((.(((((..(((((((((((((((((((((((((((((...))))))...)))))))))))))))))))))))..))))).)))))......)))))..)))).....)))).))))))..)))))..)))..)))))...	202	38	-76	1	17.5	17	10.5	23	28	34.5	18.0206	14.6373	11.2676	29.8319	27.8569	27.1955	middle
115	105	PC-5p-6870_258	CACAGTCCCCTTTGGATCTCA	21	xpSc0056071	-	19591	19772	aaaaatcaacaatgatcgagacctttttttttggagaccccCACAATCCCCTTTGGATCTCAaccattgatggtgtaggccccacacatacatgagtgggccctacacatacatcaatgattgagatctaaaaggagttgtggggttctccaaaaaaagacagtcccaagcatttttgatta	5'	New	gp4	...((((((.((((.....(((.((((((((((((((.((((((((..((.((((((((((((.(((((((((((((((.(((((.((....)).))))).)))))))...)))))))).)))))))))))).))..)))))))).))))))))))))))..))).....)))).)))))).	178	41.8	-94.9	1.2	17.5	17	10.5	23	28	34.5	18.0206	14.6373	11.2676	29.8319	27.8569	27.1955	middle
116	106	PC-3p-151815_10	AAATCCCTTCTCAAATCTCCCAGC	24	Sc0000018	-	380513	380666	gtgtttggttgggggatttaggaaaagatttagaaaagaaaatggaaaaggaaggtgaaatatgaataaaatatacatatattttacttactttcacacacttttttcctttcctttttcAAATCCCTTCTCAAATCTCCCAACcaaacacagc	3'	New	gp4	(((((((((((((((((((..(((..(((((..(((((.(((.((((((((...((((((..(((.((((((((....)))))))).))).))))))...)))))))).))).)))))..)))))..)))..)))))))))))))))))))...	151	31.8	-62.8	1.3	3.5	1.5	0	0	0	0	3.60411	1.29153	0	0	0	0	low
117	106	PC-3p-151815_10	AAATCCCTTCTCAAATCTCCCAGC	24	Sc0001301	-	538438	538565	ggactgtgtttggttggggaatttgggaagggatttagaaaggaaaagggaaaatttgcctagtttcacacatcttttccttttccttttccAAATCCCTTCTCAAATCCCCCAGCcaaacccagcat	3'	New	gp4	...(((.((((((((((((.((((((((((((((((.((((((((((((((((...((............))..))))))))))))))))..)))))))))))))))).)))))))))))).)))...	122	43	-68	1.2	3.5	1.5	0	0	0	0	3.60411	1.29153	0	0	0	0	low
118	107	PC-5p-52761_36	ATTATATGAATACTCCTCCTCACT	24	Sc0004371	-	23291	23487	atactaacaattttaaagaagttacgtacctaacaaagacaataacacttattATTATATGAATACTCCTCCTCACTtattggatcattcctcttgaatgacatgaatcagttgaattagttagtaagtggagagaagtattcatataatgatagttattatctttgttatgtatatatcttcttaaaaattgatag	5'	New	gp4	...(((.(((((((.((((((.((..(((.(((((((((.((((((...((((((((((((((((((.(((..(((((((((..((((((.....))))))..(((.((....)).)))..)))))))))..))).)))))))))))))))))))))))).))))))))).)))..)).)))))).))))))).)))	194	26.4	-72.2	1.4	19	7	2	2	3.5	3	19.5652	6.02713	2.1462	2.59408	3.48211	2.36482	middle
119	107	PC-5p-52761_36	ATTATATGAATACTCCTCCTCACT	24	Sc0005126	-	9476	9663	taacaattttcaagaagatacatacataacaaagataataacatttattATTATATGAATACTCCTCCTCACTtattggatcatctctcttgaatgacatgaatcagttgaatcagtaagtgacaaggagtattcatataatggtagttattaactttgttatgtatatatcttcttaaaaattgatt	5'	New	gp4	...(((((((.(((((((((.(((((((((((((.(((((((...((..(((((((((((((((((..((((((((((..(((.((.((.((.....)).))...)).)))..))))))))))..)))))))))))))))))..))))))))).))))))))))))).))))))))).)))))))...	182	25.5	-81.1	1.7	19	7	2	2	3.5	3	19.5652	6.02713	2.1462	2.59408	3.48211	2.36482	middle
120	108	PC-5p-96190_18	CAAATAGTGTACGGACAAACT	21	Sc0000838	+	287269	287411	CAAATAGTGTACGGACAAACTttattctcaaattacactaagtaaaaaacatgattagcaaccacacttttataaaaatgtgatagctaaccacgattttattgtaatttgagaatagagTTTGTCCGTACACTATTTGTTta	5'	New	gp4	(((((((((((((((((((((((((((((((((((((....((((((....((.(((((...((((.(((....))).))))...))))).))...)))))))))))))))))))))))))))))))))))))))))))....	139	28.7	-65.7	1.6	5	7	6	0	0	0	5.14874	6.02713	6.4386	0	0	0	low
120	109	PC-3p-2281_717	TTTGTCCGTACACTATTTGTT	21	Sc0000838	+	287269	287411	CAAATAGTGTACGGACAAACTttattctcaaattacactaagtaaaaaacatgattagcaaccacacttttataaaaatgtgatagctaaccacgattttattgtaatttgagaatagagTTTGTCCGTACACTATTTGTTta	3'	New	gp4	(((((((((((((((((((((((((((((((((((((....((((((....((.(((((...((((.(((....))).))))...))))).))...)))))))))))))))))))))))))))))))))))))))))))....	139	28.7	-65.7	1.6	128	149	163	78.5	106.5	124.5	131.808	128.292	174.915	101.818	105.956	98.1401	middle
121	110	PC-3p-43833_43	TTTCTATCTCCACGTATCAAC	21	Sc0003440	+	179373	179557	attatctgttgaacactacttgggagttacttgaccaagtttgttgatacgtggagatagaaaagtttgatcatgcaatctccattaggaattttaacataaaggttcatagatcaaactTTTCTATCTCCACGTATCAACaaacttggtcaagtaactccaagtagtgttcaccagataatgcc	3'	New	gp4	((((((((.((((((((((((.(((((((((((((((((((((((((((((((((((((((((((((((((((((.(((((((....))).............))))))).)))))))))))))))))))))))))))))))))))))))))))))))))))))))))))))).))))))))...	182	35.7	-120.1	1.8	2	6.5	2	2.5	4	4.5	2.05949	5.59662	2.1462	3.2426	3.97955	3.54723	low
122	110	PC-3p-43833_43	TTTCTATCTCCACGTATCAAC	21	Sc0003440	-	179295	179481	cattatctggtgaacactacttggagttacttgaccaagtttgttgatacgtggagatagaaaagtttgatctatgaacctttatgttaaaattcctaatggagattgcatgatcaaactTTTCTATCTCCACGTATCAACaaacttggtcaagtaactcccaagtagtgttcaacagataatgcct	3'	New	gp4	(((((((((.((((((((((((((((((((((((((((((((((((((((((((((((((((((((((((((.(((((.((..((.............))..)).)).))))))))))))))))))))))))))))))))))))))))))))))))))))).)))))))))))).)))))))))...	184	35.8	-121.9	1.8	2	6.5	2	2.5	4	4.5	2.05949	5.59662	2.1462	3.2426	3.97955	3.54723	low
123	111	PC-3p-134826_11	ATTTTCGGGCCATTTGAGTCACAG	24	Sc0000628	+	463387	463565	tgacataggaaaatgtttggtgaccacaaattctgtcgttaaaattgtccgaaaatgtcaaaacgatgtcgttttgacattttcggagttgttttgtatccaaaacgacgtctttttgacATTTTCGGGCCATTTGAGTCACAGaatttgtggccacaaatcattgccccatgacataa	3'	New	gp4	((.(((.((..((((....(((.(((((((((((((..((.((((.(((((((((((((((((.(((((((((((((((...............)))...)))))))))))).))))))))))))))))).)))).))..))))))))))))).)))....))))..)).))).))...	176	38	-75.5	1.1	3.5	0	2	0	0	0	3.60411	0	2.1462	0	0	0	low
124	111	PC-3p-134826_11	ATTTTCGGGCCATTTGAGTCACAG	24	xpSc0057322	+	4154	4312	gaaaatgtttggtggccacaaattctatggctcaaatggtccgaaaatgccaaaacgacatcgttttggcaaaacgacgttgttttgtacccaaaacgacgttgttttggcATTTTCGGGCCATTTGAGTCACAGaatttgtggccaccaatcattgcc	3'	New	gp4	...((((.((((((((((((((((((.((((((((((((((((((((((((((((((((.((((((((((((((((....)))))))...))))))))).)))))))))))))))))))))))))))))))).)))))))))))))))))).))))...	153	43.4	-108.8	1.6	3.5	0	2	0	0	0	3.60411	0	2.1462	0	0	0	low
125	112	PC-5p-14349_129	TGATCCACACCACTCATGATT	21	Sc0002030	-	245310	245510	catgtgttgttcaatacaataatgatagagacccctttttggaggacccctctaactcccaaagTGATCCACACCACTCATGATGtgggccccacacatacatgagtgagccccacacgtcatgaatggtgtggatcactttaggggttgtagggtcctccaaaaggcggtctcactcattttcctattcaataatatttt	5'	New	gp4	...((((((((.((((....(((((..((((((.(((((((((((((((...(((((((.((((((((((((((((.(((((((((((((..(((.((....)).))).))))...))))))))).)))))))))))))))).)))))))..))))))))))))))).))))))..)))))....)))).))))))))...	195	45.3	-109.5	1.2	37	28.5	39.5	3	0	0	38.1006	24.539	42.3875	3.89112	0	0	middle
126	112	PC-5p-14349_129	TGATCCACACCACTCATGATT	21	xpSc0061544	-	313	428	cgttttttagagaacctcataaccttcaaagTGATCCACACCACTCATGGTTgcgtggggtcatatcatgagtggtgtggatcactttagaggttgtcggggtcttctaaaaatga	5'	New	gp4	...((((((((..((((((((((((..((((((((((((((((((((((((...(((....)))))))))))))))))))))))))))..))))))).)))))..))))))))...	110	44	-68.3	1.3	37	28.5	39.5	3	0	0	38.1006	24.539	42.3875	3.89112	0	0	middle
127	113	PC-3p-159465_9	ACCATACAATGCACCACTCTAGGA	24	Sc0000715	+	424332	424499	accaaggatcttctagagtgttttttttcctaaagtttcctaaagtggtgtattgtgtggttgagatttaatgttgaaaaattgatgtgacttgtcattaaatctcaACCATACAATGCACCACTCTAGGAaactttaaaaaaaaaaaaactctagaggatccttatt	3'	New	gp4	...((((((((((((((((.((((((((..((((((((((((.((((((((((((((((((((((((((((((.......((....)).......)))))))))))))))))))))))))))))).))))))))))))..)))))))).))))))))))))))))...	162	31.5	-95.6	1.8	10	0	1.5	0	0	0	10.2975	0	1.60965	0	0	0	middle
128	113	PC-3p-159465_9	ACCATACAATGCACCACTCTAGGA	24	xpSc0053233	-	376757	376978	aacgagcaaggatcctctagagtattttttttctaaagtttcctagagtagtgcattatgtggttgagatttaatgacaagtcacatcaatttttcaacattaaatctcaACCATACAATGCACCACTCTAGGAaactttaggaaaaaaaatactctagaggatccctggtgcatcaaaactaggaaaattattcaataatcccagagtaccacgtgcctgt	3'	New	gp4	.((..(((.((((((((((((((((((((((((((((((((((((((((.(((((((.((((((((((((((((((......................)))))))))))))))))).))))))).)))))))))))))))).)))))))))))))))))))))))).((((((.((........(((.....)))..........))))))))..)))..))	157	35.6	-107.5	1.4	10	0	1.5	0	0	0	10.2975	0	1.60965	0	0	0	middle
129	114	PC-5p-527077_3	CAAGTGGTAGTGCAATGGTGA	21	Sc0000761	+	429832	429996	ttatgttgttggtagctCAAGTGGTAGTGCAATGGTGAtgcccaggcagaggcgtgggttcaaaccacgccaactccttctcaattttcaaaaaactcaattttcaaacaactacctcggCATCACCATTGCACTACCACTtcagctaccaacaacataagtgat	5'	New	gp4	(((((((((((((((((.((((((((((((((((((((((((.(((.((.(((((((.......)))))))...................((((......)))).......)).))).)))))))))))))))))))))))).))))))))))))))))).....	160	44.2	-93.3	1.3	1.5	0	0	0	0	0	1.54462	0	0	0	0	0	low
129	115	PC-3p-43186_44	CATCACCATTGCACTACCACT	21	Sc0000761	+	429832	429996	ttatgttgttggtagctCAAGTGGTAGTGCAATGGTGAtgcccaggcagaggcgtgggttcaaaccacgccaactccttctcaattttcaaaaaactcaattttcaaacaactacctcggCATCACCATTGCACTACCACTtcagctaccaacaacataagtgat	3'	New	gp4	(((((((((((((((((.((((((((((((((((((((((((.(((.((.(((((((.......)))))))...................((((......)))).......)).))).)))))))))))))))))))))))).))))))))))))))))).....	160	44.2	-93.3	1.3	20.5	11	5	3.5	9.5	15	21.1098	9.4712	5.3655	4.53964	9.45144	11.8241	middle
130	116	PC-3p-171270_8	TTTTGAGCCATTTGAGCCACTGAT	24	Sc0000017	+	1829406	1829562	aacggcaatgttagagggccacaaaaacagtggctcaaatggctcaaaactgtcaaaacgatgtcgttttgggtgcaaaacaacgcaaaatgacgtcgttttggcagTTTTGAGCCATTTGAGCCACTGATtttgtagccctcaaacattttccaat	3'	New	gp4	...((.((((((.((((((.((((((.((((((((((((((((((((((((((((((((((((((((((((.((........)).)))))))))))))))))))))))))))))))))))))))))))).)))))).)))))).))))))..))...	151	42.7	-107.1	1.6	5.5	0	0	0	0	0	5.66361	0	0	0	0	0	low
131	116	PC-3p-171270_8	TTTTGAGCCATTTGAGCCACTGAT	24	Sc0000035	+	626975	627156	taatgaatttttaaagattaaatgtttgagggccacaaatcagtggctcaaatggttcaaaactgtcaaaacgacgtcgttttgcattgttttgtgcccaaaacgacatcgttttggcagTTTTGAGCCATTTGAGCCACTGATtttgtggctctctagcattgctgtaaaaaaaatcacta	3'	New	gp4	...(((.(((((....((..((((((.(((((((((((((((((((((((((((((((((((((((((((((((.((((((((((((......))))..)))))))).)))))))))))))))))))))))))))))))))))))).))))))))).))))))...))..))))).)))...	176	37.4	-103.9	1.5	5.5	0	0	0	0	0	5.66361	0	0	0	0	0	low
132	117	PC-3p-48726_39	TTTGAGCCACAGAATTAGGGCCCC	24	Sc0002503	+	70440	70581	agagggcccaaattttgtggctcaaatgtggctcaaatggccaaaacgacgtcgttttgagtacaaaacaacatcaaaatggccaaaacgacgtcattttggccatttaagccataTTTGAGCCACAGAATTAGGGCCCCaa	3'	New	gp4	...((((((.(((((((((((((((((((((((.((((((((((((.((((((((((((.((...................)))))))))))))).)))))))))))).))))))))))))))))))))))).))))))...	136	43.7	-90.6	1.5	12	4	2	0	0	1.5	12.357	3.44407	2.1462	0	0	1.18241	middle
133	117	PC-3p-48726_39	TTTGAGCCACAGAATTAGGGCCCC	24	xpSc0053305	+	108998	109139	agagggctcaaattttgtggctcaaatgtggctcaaatggccaaaacgacgtcgttttgagtacaaaacaacatcaaaatggcaaaaacgacgtcgttttggccatttgagccataTTTGAGCCACAGAATTAGGGCCCCaa	3'	New	gp4	...((((((.((((((((((((((((((((((((((((((((((((((((((((((((..((.....))..(((....)))...)))))))))))))))))))))))))))))))))))))))))))))))).))))))...	136	43.7	-96.2	1.5	12	4	2	0	0	1.5	12.357	3.44407	2.1462	0	0	1.18241	middle
134	118	PC-5p-72140_25	TTTGAACTGGATTGGATGATG	21	Sc0001166	+	564233	564432	ttgaggagctaatgaatgattaaaaaagttcttggatgatgtaattttttttttcttttTTTGAACTGGATTGGATGATGtaattttcttctgtcaatattagcttattcaagaaaattacatcatccaatccagttccaaaaaaaaaaaaaaaaaaatttacatcatccaagaacttttttaatcatccattagctcct	5'	New	gp4	...(((((((((((.(((((((((((((((((((((((((((((((((((((((.(((((((((((((((((((((((((((((((((((.....((((......)))).))))))))))))))))))))))))))).)))))))).))))))))))..))))))))))))))))))))))))))))).)))))))))))	197	26	-112.1	2.2	2.5	3.5	0	1.5	2	6	2.57437	3.01356	0	1.94556	1.98978	4.72964	low
135	118	PC-5p-72140_25	TTTGAACTGGATTGGATGATG	21	Sc0001166	-	564288	564493	tgattgaggagctaatggatgattaaaaaagttcttggatgatgtaaatttttttttttttttttTTGGAACTGGATTGGATGATGtaattttcttgaataagctaatattgacagaagaaaattacatcatccaatccagttcaaaaaaagaaaaaaaaaattacatcatccaagaacttttttaatcattcattagctcctcaa	5'	New	gp4	...((((((((((((((((((((((((((((((((((((((((((((..(((((((((((((((((((.(((((((((((((((((((((((((((....................))))))))))))))))))))))))))))))))))))))))))))))))))))))))))))))))))))))))))))))))))))))))))	203	26.2	-124.8	2.3	2.5	3.5	0	1.5	2	6	2.57437	3.01356	0	1.94556	1.98978	4.72964	low
136	119	PC-3p-64760_28	TTCCCTTCCATAAATCCCTCT	21	xpSc0053675	+	26553	26697	tcaggatgttggatttggggaggaatttatggagggaaaagaaaagttgagagaaatgagaatcaaatataagatgattttttgtaacttttcccttcccttttccTTTCCTTCCATAAATCCCTCTccaaatcctggatccaaa	3'	New	gp4	...((((...(((((((((((((.(((((((((((((((.((((((..(((.((((.((((((((.........)))))))).......)))).)))..)))))).))))))))))))))).)))))))))))))...))))...	139	36.6	-63.8	1.2	3.5	2	0	2.5	5.5	7	3.60411	1.72204	0	3.2426	5.47189	5.51792	low
137	119	PC-3p-64760_28	TTCCCTTCCATAAATCCCTCT	21	xpSc0053675	+	29213	29357	tcaggatgttggatttggggagggatttatggagggaaaagaaaagttgagagaaatgagaatcaaatataagatgattttttgtaacttttccgttccctattccTTTCCTTCCATAAATCCCTCTccaaatcttggatccaaa	3'	New	gp4	...((((...(((((((((((((((((((((((((((((.(((.((..(((((((..((((((((.........))))))))......)))))..))..)).))).)))))))))))))))))))))))))))))...))))...	139	36.6	-62.8	1.2	3.5	2	0	2.5	5.5	7	3.60411	1.72204	0	3.2426	5.47189	5.51792	low
138	120	PC-3p-48624_39	ATTTCTCTTTCCAAATTCCTCCCC	24	Sc0001079	+	351039	351205	ttaatgctgtgtttggttgggggatttggagagggatttggaaatggaaagggaaaaggtgtgtgaaactaggtgaaatataggcatattttatttacatttcacctaccttttccATTTCTCTTTCCAAATTCCTCCCCaaatcctccaaccaaacacagcataag	3'	New	gp4	...((((((((((((((((((((((((((.((((((((((((((..((((.(((((((((..((((((.((..((((((((....))))))))..))..))))))..))))))))).))))..)))))))))))))).))))))))))))))))))))))))))...	161	38.9	-101	1.6	7.5	3	0	1.5	2.5	5	7.7231	2.58306	0	1.94556	2.48722	3.94137	low
139	120	PC-3p-48624_39	ATTTCTCTTTCCAAATTCCTCCCC	24	xpSc0053642	+	120722	120890	ctcttatagtgtgtttggttgggagatttggggagggatttggaaagggaaagggaaaagctgtgtgaaactatgtgaaatacatacatattttattcacatttcacctatcttttccATTTCTCTTTCCAAATTCCTCCCCaaatcccccaaccaaataaggtaattt	3'	New	gp4	...((((....((((((((((((.((((((((((((((((((((((((((((.(((((((....((((((....((((((((......)))))))).....))))))....))))))).)))))))))))))))))))))))))))).))))))))))))..))))...	163	37.3	-87.7	1.4	7.5	3	0	1.5	2.5	5	7.7231	2.58306	0	1.94556	2.48722	3.94137	low
140	121	PC-3p-132103_12	TTGACATACTCCGCCAAGTAC	21	Sc0003347	+	142456	142654	tttaatagtgactaatctgctgcatctcatagctcatcggagcggattgcgcaatgtacttggcggagtatgtcaacagcgacgagatctctttcggcccaagtacagatcccgtcgctgTTGACATACTCCGCCAAGTACattgcgcaatcggctctgatgaactgtgagatgcagcagattagtcactactgaacaa	3'	New	gp4	((((.(((((((((((((((((((((((((((.((((((((((.((((((((((((((((((((((((((((((((((((((((.((((((((.......)))...))))).)))))))))))))))))))))))))))))))))))))))).)))))))))).))))))))))))))))))))))))))).))))...	196	48.2	-157.5	1.6	2	4	1.5	0	2	0	2.05949	3.44407	1.60965	0	1.98978	0	low
141	121	PC-3p-132103_12	TTGACATACTCCGCCAAGTAC	21	Sc0003347	-	142391	142586	ttcagtagtgactaatctgctgcatctcacagttcatcagagccgattgcgcaatgtacttggcggagtatgtcaacagcgacgggatctgtacttgggccgaaagagatctcgtcgctgTTGACATACTCCGCCAAGTACattgcgcaatccgctccgatgagctatgagatgcagcagattagtcactattaaa	3'	New	gp4	...((((((((((((((((((((((((((.((((((((.((((.((((((((((((((((((((((((((((((((((((((((((((((...(((.......))))))))))))))))))))))))))))))))))))))))))))))))).)))).)))))))).))))))))))))))))))))))))))...	190	48.5	-157.9	1.7	2	4	1.5	0	2	0	2.05949	3.44407	1.60965	0	1.98978	0	low
142	122	PC-5p-9068_200	CCCAATAGTCTCAGGAGTCACACG	24	xpSc0054185	+	45067	45218	gaaaaattatttggtgctcttggggtaatgtCCCAATAGTCTCAGGAGTCACACGatcgcgtggaccccatgcatattgggataggctccacatgatcgTGTGGCTCCTGGGGGCATTGGAGCattgttccaagagcaccaaataatttctc	5'	New	gp4	((.((((((((((((((((((((..(((((..(((((..(((((((((((((((((((..((((((((((.......)))....)).)))))..)))))))))))))))))))..)))))..)))))..)))))))))))))))))))).))	152	48.7	-96.5	1.3	341	284	148	58	43	62	351.144	244.529	158.819	75.2283	42.7802	48.873	middle
142	123	PC-3p-11425_160	TGTGGCTCCTGGGGGCATTGGAGC	24	xpSc0054185	+	45067	45218	gaaaaattatttggtgctcttggggtaatgtCCCAATAGTCTCAGGAGTCACACGatcgcgtggaccccatgcatattgggataggctccacatgatcgTGTGGCTCCTGGGGGCATTGGAGCattgttccaagagcaccaaataatttctc	3'	New	gp4	((.((((((((((((((((((((..(((((..(((((..(((((((((((((((((((..((((((((((.......)))....)).)))))..)))))))))))))))))))..)))))..)))))..)))))))))))))))))))).))	152	48.7	-96.5	1.3	141	147	79	6	28	48	145.194	126.57	84.7749	7.78224	27.8569	37.8372	middle
143	124	PC-5p-156041_9	CAAATGTGAGATAAGGATGGGTCT	24	Sc0003072	+	134836	134925	atagaataCAAATGTGAGATAAGGATGGGTCTcacatgatgtcagatacatatgtgAGACCCACCCTTTTGTCTCACATCtgtgtttcaa	5'	New	gp4	...(((((((.(((((((((((((.(((((((((((((.(((.....)))))))))))))))).)))..)))))))))).)))))))...	84	38.9	-47.3	1.4	18	3	0	3	0	3	18.5354	2.58306	0	3.89112	0	2.36482	middle
143	125	PC-3p-112583_15	AGACCCACCCTTTTGTCTCACATC	24	Sc0003072	+	134836	134925	atagaataCAAATGTGAGATAAGGATGGGTCTcacatgatgtcagatacatatgtgAGACCCACCCTTTTGTCTCACATCtgtgtttcaa	3'	New	gp4	...(((((((.(((((((((((((.(((((((((((((.(((.....)))))))))))))))).)))..)))))))))).)))))))...	84	38.9	-47.3	1.4	8	3	4	3	0	0	8.23798	2.58306	4.2924	3.89112	0	0	low
144	126	PC-3p-48095_39	AATCCCTCTTCAAATCTTCCAACC	24	Sc0001942	+	62615	62766	tgtttggttggatgatttgaggaggaatttggaaagggaaaggaaaaagttaggtgaaatgtgaataaaatatacgtacattgaacctagtttcacacactttttccctttccctttccaAATCCCTCTTCAAATCTTCCAACCaaacagag	3'	New	gp4	((((((((((((.((((((((((((.(((((((((((((((((((((((((((((..((((((..((.....))..))))))..))))).........))))))).))))))))))))))))).)))))))))))).))))))))))))...	149	36.8	-82.5	1.5	7.5	7	0	1.5	0	3.5	7.7231	6.02713	0	1.94556	0	2.75896	low
145	126	PC-3p-48095_39	AATCCCTCTTCAAATCTTCCAACC	24	Sc0002129	+	209824	209975	tgtttggttgaaggatttgaggagggatttagaaaaggaaagggaaaatgtgtgtgaaactaggtgaaatgtaggtatattttattcacatttcactaaacttttccctttccttttccaAATCCCTCTTCAAATCTTCCAACCaaatacaa	3'	New	gp4	((((((((((.(((((((((((((((((((.(((((((((((((((((.((((.....))..((((((((((..(((.....)))..))))))))))..))))))))))))))))))).))))))))))))))))))).))))))))))...	149	34.2	-82.3	1.6	7.5	7	0	1.5	0	3.5	7.7231	6.02713	0	1.94556	0	2.75896	low
146	127	PC-5p-26104_73	AGAACACGTCTCAATTAGGTTGAC	24	Sc0002368	-	235313	235452	gttagaaaaaacatcattgccaaAGAACACGTCTCAATTAGGTTGACacatgcaactaaccaatcatatgcaatacgttgcattaggcATGTGCCAACCTAGTTGGGATGTGctcttatacgatgatcattttttcttgg	5'	New	gp4	...((((((((.(((((((...((((.((((((((((((((((((.(((((((..............((((((....))))))...))))))).)))))))))))))))))).))))...)))))))..))))))))...	134	38.6	-58.5	1.1	77	62	27	0	0	4	79.2905	53.3831	28.9737	0	0	3.1531	middle
146	128	PC-3p-18877_99	ATGTGCCAACCTAGTTGGGATGTG	24	Sc0002368	-	235313	235452	gttagaaaaaacatcattgccaaAGAACACGTCTCAATTAGGTTGACacatgcaactaaccaatcatatgcaatacgttgcattaggcATGTGCCAACCTAGTTGGGATGTGctcttatacgatgatcattttttcttgg	3'	New	gp4	...((((((((.(((((((...((((.((((((((((((((((((.(((((((..............((((((....))))))...))))))).)))))))))))))))))).))))...)))))))..))))))))...	134	38.6	-58.5	1.1	64	55	22	3	5	7	65.9038	47.356	23.6082	3.89112	4.97444	5.51792	middle
147	129	PC-3p-146293_10	TCCTCCCCAAATCTTTCAACC	21	Sc0000052	-	1649255	1649400	ttggttgggagatttgaagagagatttggaaatgaaaatggaaaaggtaggtgaaatgtgaataaaatatatttaaattgtacctagtttcatacacctttttccttttcctttccaaatTCCTCCCCAAATCTTCCAACCaaaca	3'	New	gp4	((((((((((((((((..(((..(((((((((.(((((.(((((((((..(((((((........(((........))).......)))))))..))))))))).))))).)))))))))..)))..))))))))))))))))...	143	32.9	-62	1.3	4.5	0	0	0	2	1.5	4.63386	0	0	0	1.98978	1.18241	low
148	129	PC-3p-146293_10	TCCTCCCCAAATCTTTCAACC	21	xpSc0053918	-	27767	27912	ttggttgagggatttggagagggatttgaaaaaaaaaagagaaaaggtgtgtgaaactaggtgaaatgtaggtatattttattcacatttcacctaacttttccctttctttttccaaatTCCTCCCCAAATCTTTCAACCaaaga	3'	New	gp4	((((((((..(((((((.((((((((((.(((((.((((.((((((..((.....)).(((((((((((..(((.....)))..)))))))))))..)))))).)))).))))).)))))))))).)))))))..))))))))...	143	34.2	-67.8	1.4	4.5	0	0	0	2	1.5	4.63386	0	0	0	1.98978	1.18241	low
149	130	PC-5p-365976_3	TTAGATTTGTAGAGGGAAAAG	21	Sc0000149	+	775954	776068	acttaggctgtttttggatcTTAGATTTGTAGAGGGAAAAGacaagggaagggaactcttttccctttccttttcTTTTCCCTCCACAAATCTAAAatcaaaacacaatctaaag	5'	New	gp4	..((((..(((.(((.(((.((((((((((.(((((((((((.((((((((((((.....)))))))))))).))))))))))).)))))))))).))).))).)))..))))..	111	36.5	-59.1	1.4	3	0	0	0	0	0	3.08924	0	0	0	0	0	low
149	131	PC-3p-28823_66	TTTTCCCTCCACAAATCTAAA	21	Sc0000149	+	775954	776068	acttaggctgtttttggatcTTAGATTTGTAGAGGGAAAAGacaagggaagggaactcttttccctttccttttcTTTTCCCTCCACAAATCTAAAatcaaaacacaatctaaag	3'	New	gp4	..((((..(((.(((.(((.((((((((((.(((((((((((.((((((((((((.....)))))))))))).))))))))))).)))))))))).))).))).)))..))))..	111	36.5	-59.1	1.4	5	8	5	11	29	20	5.14874	6.88815	5.3655	14.2674	28.8518	15.7655	middle
150	132	PC-5p-113779_14	CGTAGAGACAAGACAGATAGCT	22	Sc0001923	+	379633	379794	atataaatctcctagtCGTAGAGACAAGACAGATAGCTtactcacttcactgcactacactacaaccctaacctgagcagcaggaccaacgctgacaggccattagtgtagtgaagcgagTAAGCTATCTGTCTTGTCTCTacgactaggagatttatatct	5'	New	gp4	(((((((((((((((((((((((((((((((((((((((((((.(((((((((((((..............((((..((((.........)))).))))....))))))))))))).)))))))))))))))))))))))))))))))))))))))))))..	160	43.8	-105.1	1.5	0	11	3	0	0	3	0	9.4712	3.2193	0	0	2.36482	low
150	133	PC-3p-98726_17	TAAGCTATCTGTCTTGTCTCT	21	Sc0001923	+	379633	379794	atataaatctcctagtCGTAGAGACAAGACAGATAGCTtactcacttcactgcactacactacaaccctaacctgagcagcaggaccaacgctgacaggccattagtgtagtgaagcgagTAAGCTATCTGTCTTGTCTCTacgactaggagatttatatct	3'	New	gp4	(((((((((((((((((((((((((((((((((((((((((((.(((((((((((((..............((((..((((.........)))).))))....))))))))))))).)))))))))))))))))))))))))))))))))))))))))))..	160	43.8	-105.1	1.5	0	18	4	0	5	9	0	15.4983	4.2924	0	4.97444	7.09447	middle
151	134	PC-3p-199431_7	AAATCTATCCTCAAATTCTCCAAC	24	Sc0000728	+	656493	656646	gtgtttggttgggagatttggggagggatttagaaagggaaagagaaaaagtgtgtgaaactaaatgaaatgtaagtatattttattcacatttcacctaatttttccttttctctttccAAATCTATCCTCAAATTCTCCAACcaaacacagc	3'	New	gp4	((((((((((((..((((((((((..(((((.((((((((((..((((((....((((((...((((((((((....))))))))))....))))))....))))))..)))))))))).)))))..))))))))))..))))))))))))...	151	34.4	-71.5	1.3	0	5.5	0	0	0	0	0	4.7356	0	0	0	0	low
152	134	PC-3p-199431_7	AAATCTATCCTCAAATTCTCCAAC	24	xfSc0001753	-	29690	29843	gtgtttggttgggagatttggggagggatttagaaagggaaagggaaaaggtgtataaaactaggtgaaatgtaagtatattttattcacatttcacctaatttttccttttctctttccAAATCTATCCTCAAATTCTCCAACcaaacacagc	3'	New	gp4	((((((((((((..((((((((((..(((((.((((((((((((((((((..((.....))((((((((((((.((((.....)))).)))))))))))).)))))))))))))))))).)))))..))))))))))..))))))))))))...	151	35.7	-81.5	1.5	0	5.5	0	0	0	0	0	4.7356	0	0	0	0	low
153	135	PC-3p-144000_11	AAATCACTCCCCAAATCTCCC	21	Sc0001573	+	430452	430605	tgtgtttggttgggaatttggaaagagatttggaaagagaaacagaaaagataggtgaaataagaataaaatatacctatatttcaccgaatttcacaccccttttccctttccatttctAAATCACTCCCCAAATCTCCCaaccaaacacggc	3'	New	gp4	(((((((((((((((((((((..((.((((((((((..((((..((((((....(((((((.......((((((....))))))......)))))))....))))))..))))..)))))))))).))..)))))).)))))))))))))))..	152	37	-60.9	1.1	1.5	0	0	0	1.5	6.5	1.54462	0	0	0	1.49233	5.12378	low
154	135	PC-3p-144000_11	AAATCACTCCCCAAATCTCCC	21	xfSc0000596	+	7094	7246	atgtatggttagggaatttggggagagatttggaaagagaaaggaaaaatgtgtgtaaaattaggcgaaatataggcatgttttattcacatttcacttatcttttctatttccctttctAAATCACTCCCCAAATCTCCCaaccaaacacaa	3'	New	gp4	.(((.(((((.((((((((((((((.(((((((((((((((((((.(((((((..((((((...((.........))..))))))..)))))))......))))))))......))))))))))).)))))))))).))))))))).)))...	149	34.6	-61.3	1.2	1.5	0	0	0	1.5	6.5	1.54462	0	0	0	1.49233	5.12378	low
155	136	PC-3p-140157_11	CACCCACCTTTTCTCTTTCCC	21	Sc0001232	-	514121	514297	catctcttaggctgtgtttggttcatgaattggatagggatttggaaagggaaagagaaaaagtgtgtgaaaggtgcgtgaaatgtagctatatttcattcacatttCACCCACCTTTTCTCTTTCCCttttcaaatccctacccaaatccatgaaccaaacacggccttatagttg	3'	New	gp4	((.((...(((((((((((((((((((..((((.(((((((((((((((((((((((((((.(((.((((((.(((..((((((((....))))))))..))).)))))).))).))))))))))))))))))))))))))).))))...)))))))))))))))))))...)).))	177	40.1	-104.7	1.5	0	0	0	1.5	0	4	0	0	0	1.94556	0	3.1531	low
156	136	PC-3p-140157_11	CACCCACCTTTTCTCTTTCCC	21	Sc0002887	+	236210	236344	tttggataatcgatttgggtaaggatttggaaaggaaaacagaaaatgtgtgtgaaatgtaagtatatttcattcacatttCACCCACCTTTTCTCTTTCCCttcttaaatccctacttaaatccataatcctgt	3'	New	gp4	...((((.((.(((((..(((.(((((((..((((.(((.((((((.(((.(((((((((.(((.......))).))))))))).))).)))))).))).))))..))))))).)))..))))).)).))))...	129	33.3	-48.7	1.1	0	0	0	1.5	0	4	0	0	0	1.94556	0	3.1531	low
157	137	PC-5p-25925_73	TGGTCAGTTACTGATCCTATC	21	Sc0000498	-	882523	882618	tctggctagaactgaatcTGGTAAGTTACTGATCCTATCttctccattcccccagaagaTAGGATCAACAGCTTACCAGAtttagtttttgcccac	5'	New	gp4	...(((.((((((((((((((((((((..((((((((((((((..........))))))))))))))..)))))))))))))))))))).)))...	90	42.7	-54	1.3	23	29	55	67	17	13	23.6842	24.9695	59.0205	86.9016	16.9131	10.2476	middle
157	138	PC-3p-5015_344	TAGGATCAATAGCTTACCAGA	21	Sc0000498	-	882523	882618	tctggctagaactgaatcTGGTAAGTTACTGATCCTATCttctccattcccccagaagaTAGGATCAACAGCTTACCAGAtttagtttttgcccac	3'	New	gp4	...(((.((((((((((((((((((((..((((((((((((((..........))))))))))))))..)))))))))))))))))))).)))...	90	42.7	-54	1.3	304	300	185	137	207	230	313.043	258.306	198.524	177.694	205.942	181.303	middle
158	139	PC-3p-4931_349	TGACTGTGGAGAAGAAGTGGGGCC	24	Sc0003846	-	93774	93985	atagccaacgacatatactgggtggccccacttcttctccccagtcacgggctttttagctgatgctaatagattcagggacactgttgtcaaatctattagcatcagctaataagtctgTGACTGTGGAGAAGAAGTGGGGCCacccagtatacgtccttggctataacaagaatagccaaactgataggctcagttttatttcctctgca	3'	New	gp4	((((((((.(((.(((((((((((((((((((((((((((.(((((((((((((.((((((((((((((((((((....((((....)))).)))))))))))))))))))).))))))))))))).))))))))))))))))))))))))))).))).)))))))).....(((((...(((((((.....))))))))))))........	167	45.3	-136.2	1.4	104	121.5	18.5	30.5	29.5	75	107.094	104.614	19.8524	39.5597	29.3492	59.1206	middle
159	139	PC-3p-4931_349	TGACTGTGGAGAAGAAGTGGGGCC	24	xfSc0001692	-	2367	2578	atagccaatgacgtatactgggtggccccacttcttctccatagttacggacttattagctgaagctaatagattcaggggcactgttgtcgaatctatttgcaccagttaataagtacgTGATTGTGGAGAAGAAGTGGGGCCacccagtatacatcgttggctataacaagaatagccaagctgagaggctcagttttatttcctctgca	3'	New	gp4	(((((((((((.(((((((((((((((((((((((((((((((((((((.((((((((((((..((.(((((((((...((((....))))))))))))).))..)))))))))))).))))))))))))))))))))))))))))))))))))).))))))))))).....(((((...((((((((...)))))))))))))........	167	44.3	-129.1	1.4	104	121.5	18.5	30.5	29.5	75	107.094	104.614	19.8524	39.5597	29.3492	59.1206	middle
160	140	PC-3p-128862_12	ATTTGAGCCACAGAAATTAGGACC	24	Sc0000006	+	1538660	1538816	aatgatagagggtcctaatttctgtggctcaaatggctcgaatttgccaaaacgacgtcgttttgagtacaaaacaacatcaaaattgccaaaacgacgtcgttttgataaatttgagtcATTTGAGCCACAGAAATTAGGACCctcaaacattttc	3'	New	gp4	((((...((((((((((((((((((((((((((((((((((((((..((((((((((((((((((.(((.................)))))))))))))))))))))..))))))))))))))))))))))))))))))))))))))...))))...	154	38.2	-98.3	1.6	10.5	0	1.5	0	0	0	10.8123	0	1.60965	0	0	0	middle
161	140	PC-3p-128862_12	ATTTGAGCCACAGAAATTAGGACC	24	xpSc0053857	-	8014	8172	aatgtttgagggccctaatttctgtgactcaaatggctcaaatttgctaaaacgacgtcgttttggcaattttgatgttgttttgtactcaaaacgacgtcgttttgacaaattcgaactATTTGAGCCACAGAAATTAGGACCctctatcattgttgt	3'	New	gp4	((((...(((((.(((((((((((((.(((((((((.((.((((((..((((((((((((((((((((((......)))))........)))))))))))))))))..)))))).)).))))))))).))))))))))))).)))))...)))).....	154	37.7	-79.2	1.3	10.5	0	1.5	0	0	0	10.8123	0	1.60965	0	0	0	middle
162	141	PC-5p-73102_25	TCTTGCTTGGTGCTCTGCTGT	21	Sc0001942	+	146177	146323	taatctTCTTGCTTGGTGCTCTGCTGTtttaccattcagatttgtttcaagaatttatctcgaaataaaggtatgaatgaagtattttcgagataaattcttgaagcaaatctgaatggtaaaacagcagagcaccaagcaagaaga	5'	New	gp4	...((((((((((((((((((((((((((((((((((((((((((((((((((((((((((((((.....((((.......))))))))))))))))))))))))))))))))))))))))))))))))))))))))))))))))))	144	34	-105.9	2.1	0	5.5	1.5	1.5	4.5	2.5	0	4.7356	1.60965	1.94556	4.477	1.97069	low
163	141	PC-5p-73102_25	TCTTGCTTGGTGCTCTGCTGT	21	Sc0001942	-	146294	146440	aaatctTCTTGCTTGGTGCTCTGCTGTtttaccattcagatttgcttcaagaatttatctcgaaaatacttcattcatacctttatttcgagataaattcttgaaacaaatctgaatggtaaaacagcagagcaccaagcaagaaga	5'	New	gp4	...(((((((((((((((((((((((((((((((((((((((((.((((((((((((((((((((....................)))))))))))))))))))).)))))))))))))))))))))))))))))))))))))))))	144	34	-100.8	2	0	5.5	1.5	1.5	4.5	2.5	0	4.7356	1.60965	1.94556	4.477	1.97069	low
164	142	PC-3p-145315_10	AAGAGTCACAAATCTTTCATGATC	24	Sc0000690	+	544877	545035	tgctaggtatcatgaaaagtctttcatgaaaatgatcatgaaagatttgtgacctttggattacacttagaataaagcaccacacactaatcaagataatctAAGAGTCACAAATCTTTCATGATCattttcatgaaaaaaatttcatgatccctaaca	3'	New	gp4	.(.((((.(((((((((....((((((((((((((((((((((((((((((((..((((((((..(((.((.((.............)).))))).))))))))..))))))))))))))))))))))))))))))))....))))))))).)))).).	157	30.8	-70.4	1.4	3	2	0	0	0	0	3.08924	1.72204	0	0	0	0	low
165	142	PC-3p-145315_10	AAGAGTCACAAATCTTTCATGATC	24	Sc0002492	+	215922	216064	atgatgaagagtctttcatgaaaatgatcataaaagatttgtgacctttagattatacttagaataaagcactacacactaatcaagataatctAAGAGTCACAAATCTTTCATGATCattttcataaaaaatttttcatgac	3'	New	gp4	...(((((((((.(((.((((((((((((((.(((((((((((((..(((((((((.(((.((.((.............)).))))))))))))))..))))))))))))).)))))))))))))).))).)))))))))...	137	26.6	-54.8	1.4	3	2	0	0	0	0	3.08924	1.72204	0	0	0	0	low
166	143	PC-3p-61827_30	TTTGACATTTTCGGGCCATTT	21	Sc0001889	+	381123	381289	aatggcaatgattggtggccacaaattctatggctcaaatggttcgaaaatgccaaaacgacgtcgttttgggtacaaaacaactccgaaaatgccaaaacgacgtcgtTTTGACATTTTCGGGCCATTTgagccacagaatttgtagccaccaaacattttcctaa	3'	New	gp4	...((.((((.((((((((.(((((((((.((((((((((((..((((((((.(((((((((((((((((((......................))))))))))))))))))).))))))))..)))))))))))).))))))))).)))))))).))))..))...	161	41.9	-97.9	1.4	5	4	2	1.5	0	2.5	5.14874	3.44407	2.1462	1.94556	0	1.97069	low
167	143	PC-3p-61827_30	TTTGACATTTTCGGGCCATTT	21	xpSc0054252	+	31977	32125	tgattggtggtcacaaattctgtggctcaaatggctcgaaaatgccaaaacgacgtcgttttgagtacaaaaaactctgaaaatgccaaaacgatgtcatTTTGACATTTTCGGGCCATTTgagccacagaatttgtggccaccaaaca	3'	New	gp4	.(.(((((((((((((((((((((((((((((((((((((((((.(((((.((((((((((((.(((................))))))))))))))).))))).))))))))))))))))))))))))))))))))))))))))).).	147	41.6	-97.5	1.6	5	4	2	1.5	0	2.5	5.14874	3.44407	2.1462	1.94556	0	1.97069	low
168	144	PC-3p-52926_35	ATTTCTCTTTCCAAATCTCTCCCC	24	Sc0000882	+	96322	96482	acactgtttttggttggaggatttggggaaggatttggaaaagggaaaggaaaaggtgtgtgaaactaggtgaaatgtaggtatgttttatttacattttacctatcttttccATTTCTCTTTCCAAATCTCTCCCCaaatcctccaaccaaacatagcat	3'	New	gp4	...((((.(((((((((((((((((((((..((((((((((.(((((((((((((((..........((((((((((((..((.....))..))))))))))))))))))))).))))))))))))))))..))))))))))))))))))))).))))...	155	37.3	-91	1.5	9	3.5	2	0	0	4.5	9.26772	3.01356	2.1462	0	0	3.54723	low
169	144	PC-3p-52926_35	ATTTCTCTTTCCAAATCTCTCCCC	24	Sc0003005	+	32786	32948	tacgctgtgtttggttgagggatttggagagggatttggaaagggaaaaggaaaaggtgtgtgaaactaggtgaaatgtaagtatgttttattcacatttcacttaccttttccATTTCTCTTTCCAAATCTCTCCCCaaatcccccaaccaaacacagcatt	3'	New	gp4	...((((((((((((((.(((((((((.((((((((((((((((((((.((((((((((..........((((((((((.((((.....)))).)))))))))))))))))))).)))))))))))))))))))).))))))))).))))))))))))))...	157	39.9	-100.9	1.6	9	3.5	2	0	0	4.5	9.26772	3.01356	2.1462	0	0	3.54723	low
170	145	PC-3p-20133_93	TGTTTGAATAGGCAGTTATCC	21	Sc0000127	+	389391	389524	catttcaggataactgcctattcaaacaggccttgctatgggatatggagaggataagcaaaaatttatttatttctttatagttatctgttggaaaagtaaggtcTGTTTGAATAGGCAGTTATCCtgagttc	3'	New	gp4	...((((((((((((((((((((((((((((((((((......(((..((((((((((......))))))...))))..)))....((.....))..))))))))))))))))))))))))))))))))))...	128	35.1	-63.5	1.4	8	7.5	3	10	6.5	11.5	8.23798	6.45764	3.2193	12.9704	6.46677	9.06515	middle
171	145	PC-3p-20133_93	TGTTTGAATAGGCAGTTATCC	21	Sc0003462	+	229365	229498	catttcaggataactgccttttcaaacaggccttgctatgggatatggagaggataaacaaaaatttatttatttctttatagctatctgttggaaaagtaaggccTGTTTGAATAGGCAGTTATCCtgagttc	3'	New	gp4	...((((((((((((((((.(((((((((((((((((((((..(((..((((((((((......))))))...))))..))).))))..........))))))))))))))))).))))))))))))))))...	128	35.8	-64.2	1.3	8	7.5	3	10	6.5	11.5	8.23798	6.45764	3.2193	12.9704	6.46677	9.06515	middle
172	146	PC-3p-144043_11	AATTCGAGCCATTTGAGCCACAAA	24	Sc0000078	+	672697	672842	tttgagggccctaatttctgtggctcaaatggctcaaatttaccaaaacgacgtcgttttggcaattttgatgttgttttatactcaaaacgacgtcgttttggcaAATTCGAGCCATTTGAGCCACAAAaattagggccctctac	3'	New	gp4	...((((((((((((((.(((((((((((((((((.(((((.((((((((((((((((((((((((......)))))........))))))))))))))))))).))))).))))))))))))))))).))))))))))))))...	140	41.1	-96.1	1.6	4	0	0	0	0	1.5	4.11899	0	0	0	0	1.18241	low
173	146	PC-3p-144043_11	AATTCGAGCCATTTGAGCCACAAA	24	xfSc0002306	+	6331	6476	tttgagggccctaatttctgtggctcaaatggctcaaatttgccaaaacgacgtcgttttgacaattttgatgttgttttgtactcaaaacgacgtcgttttgacaAATTCGAGCCATTTGAGCCACAAAaattagggccctctac	3'	New	gp4	...((((((((((((((.(((((((((((((((((.((((((.(((((((((((((((((((((((......))))........))))))))))))))))))).)))))).))))))))))))))))).))))))))))))))...	140	41.1	-95.5	1.6	4	0	0	0	0	1.5	4.11899	0	0	0	0	1.18241	low
174	147	PC-3p-9651_188	TCAACCATACAACGCACCACT	21	Sc0004842	+	81390	81549	aaagatcctctagagtattttttttctaaaattttttaaagtggtgtattgtgtggttgagatttaatgctgaaaaattgatgtgacttgtcattaaatcTCAACCATACAACGCACCACTctaagaaactttagaaaaaaaaaactctagaggatcctt	3'	New	gp4	...(((((((((((((.(((((((((((((.(((((((.(((((((..((((((((((((((((((((((...................).)))))))))))))))))))))..))))))).))))))).))))))))))))).)))))))))))))...	154	30	-84.7	1.8	19	24	22	11	14	11	19.5652	20.6644	23.6082	14.2674	13.9284	8.67102	middle
175	147	PC-3p-9651_188	TCAACCATACAACGCACCACT	21	Sc0004901	-	27889	28045	accaaggatcctctagagtttttttttttcctaaagtggtgtgttgtatgggtgagatttaatgctaaaaaattgatgtgacttatcattaaatcTCAACCATACAACACACCACTctaggaaactttagggaaaaaaactctagaggatccttact	3'	New	gp4	...((((((((((((((((((((((((((((((.(((((((((((((((((.((((((((((((.(((...((....))...))).)))))))))))).))))))))))))))))).))))))).......)))))))))))))))))))))))...	151	34.4	-87.9	1.6	19	24	22	11	14	11	19.5652	20.6644	23.6082	14.2674	13.9284	8.67102	middle
176	148	PC-5p-130604_12	AAAACCATCTGCACCGTTAGATCA	24	Sc0002987	+	176636	176728	catgaaaactgtcatgAAAACCATCTGCACCGTTAGATCAagtatgtgtctcatgatccaacggtgcagatggtttttatgacagttttcata	5'	New	gp4	.(((((((((((((((((((((((((((((((((.(((((((.......))..))))).))))))))))))))))))))))))))))))))).	91	38.7	-60.4	1.7	3.5	2.5	0	0	0	0	3.60411	2.15255	0	0	0	0	low
177	148	PC-5p-130604_12	AAAACCATCTGCACCGTTAGATCA	24	xpSc0057032	+	8635	8794	ttttatgaaatgctaggtgtcatgaagaattttcatgaaaactgtcatgAAAACCATCTGCACCGTTAGATCAgatatgtgtctcatgatccaacggtgcaaatgattttcatgacagttttcatgacagttttcatgaaacgtagcaggacccatatat	5'	New	gp4	...((((...(((((.((.(((((((((....(((((((((((((((((((((.(((.(((((((((.(((((((........)).))))).))))))))).))).)))))))))))))))))))))...))))))))).)).))))).....))))...	154	36.2	-77.7	1.3	3.5	2.5	0	0	0	0	3.60411	2.15255	0	0	0	0	low
178	149	PC-3p-101468_17	AAATCCTTCTTCAAATCTCCCAAC	24	Sc0000318	-	240233	240386	gtgttcggttgagagatttggggagagatttggaaagagaaacggaaacggaaaaagtgtgtgaaactatgtgaattgtaagtatattttattcatattttatctaccatttccatttccAAATCCTTCTTCAAATCTCTCAACcaaacacagt	3'	New	gp4	(((((.((((((((((((((..((..((((((((((..((((.((....(((.((((((((..(((.((((...........)))).)))...)))))))).))).)).))))..))))))))))..))..)))))))))))))).)))))...	151	34.4	-62.7	1.2	3.5	3	0	2	0	0	3.60411	2.58306	0	2.59408	0	0	low
179	149	PC-3p-101468_17	AAATCCTTCTTCAAATCTCCCAAC	24	xfSc0041491	-	790	940	gtatttggtttggaaatttaggaagaaatttagaaagagaaagaaaaaaattgtgtaaaactatgtgaaatatacatatattttattcacatttcacattcttttttcattttcttttccAAATCCTTCTTCAAATCTCCCAACcaaacat	3'	New	gp4	...(((((((.(((.((((((((((..((((.(((((((((.(((((((..((((.(((.....(((((((((....))))))))).....)))))))...))))))).)))))))))..)))).)))))).)))).))).)))))))...	145	25.2	-39.1	1	3.5	3	0	2	0	0	3.60411	2.58306	0	2.59408	0	0	low
180	150	PC-3p-52005_36	AACCATACAACACACCACTCT	21	Sc0000168	+	158094	158258	caccaaggatcctcagtttttttttcttaaagtttcctaaagcggtgtgttgtatgggtgagatttaatgctaaaaaattgatgtgactgtcattaaatcttAACCATACAACACACCACTCTaggaaactctaggaaaaaaaaaactctagaggatccttgctc	3'	New	gp4	...((((((((((((((((((((((((((.(((((((((.((.((((((((((((((.(((((((((((((..................).)))))))))))).)))))))))))))).)).))))))))).))))))))))))).))...)))))))))))...	159	35.8	-83.1	1.4	9	5	2.5	2	2.5	6	9.26772	4.30509	2.68275	2.59408	2.48722	4.72964	low
181	150	PC-3p-52005_36	AACCATACAACACACCACTCT	21	Sc0000188	+	963253	963450	ggcctaacaatgcgcaccaaggatcctctagagtttttttttcctaaagtttcctaaagtggtgtgttgtatgggtgagatttaatgctaaaaaattgatgtgacttgtcattaaatctcAACCATACAACACACCACTCTaggaaactctagaaaaaaaaaaactttagaggatccttgctcaacaatgcggcccaa	3'	New	gp4	((((...((.((.....(((((((((((((((((((((((((.(((.(((((((((.(((((((((((((((((.(((((((((((((...................).)))))))))))).))))))))))))))))).))))))))).)))..))))))))))))))))))))))))).....)).)).))))...	195	37.9	-103.2	1.4	9	5	2.5	2	2.5	6	9.26772	4.30509	2.68275	2.59408	2.48722	4.72964	low
182	151	PC-5p-110243_15	AATTTATGACCCTTGGATTACCTT	24	Sc0000830	+	37408	37617	acctatgttattccggaagagaaaagatagggatcatgaaaaaactttcatcaaattgatcatgaaaAATTTATGACCCTTGGATTACCTTgattagtgtgtggtattttattttaagtgtaatttaaaggtcataaatatttcatgatcattttcatgaaattttttttgatgatacctagcattgctcattccggaaataatgtatta	5'	New	gp4	...((..((((((((((((((......((((.((((((((((((.((((((.(((.(((((((((((.((((((((((.((..((((((((((..((((.....)))).....))))).)))))..)).)))))))))).))))))))))).))).)))))).))))))).))))).))))......))).)))))))).)))..))...	204	28.1	-77.2	1.3	6	1.5	0	0	0	0	6.17848	1.29153	0	0	0	0	low
183	151	PC-5p-110243_15	AATTTATGACCCTTGGATTACCTT	24	Sc0001358	+	388507	388665	agatagggatcatgaaaaacctttcatgaaactggtcatgaaaAATTTATGACCCTTGGATTACCTTgattagtgtgtggtattttattttaagtgtaatccaagggtcataaatccttcatgataattttcatgaaaaatttttcatgatacctagca	5'	New	gp4	...((((.(((((((((((..((((((((((...((((((((..(((((((((((((((((((((((((..((((.....)))).....))))).))))))))))))))))))))..))))))))...))))))))))..))))))))))).))))...	153	30.8	-73.7	1.5	6	1.5	0	0	0	0	6.17848	1.29153	0	0	0	0	low
184	152	PC-5p-2760_597	CACAGCCCCCTTTGGATCTCA	21	Sc0001517	-	427736	427895	tgattgagacccctttttttggagaccccCACAGCCCCCTTTGGATCTCCaccattgatggtgtgggtcccacacatacatcaatggtggagatctatacatcaatgttggagatccaaagggggttgtgggggtctctaaaaaatgggggtctcaagat	5'	New	gp4	...((((((((((((((((((((((((((((((((((((((((((((((((.((((((((.((((((((((((.(((......))))))).)))))))))))))))).))))))))))))))))))))))))))))))))))))).)))))))))))...	154	48.8	-123.7	1.6	30	26.5	30	50	64.5	111.5	30.8924	22.817	32.193	64.852	64.1703	87.8926	middle
185	152	PC-5p-2760_597	CACAGCCCCCTTTGGATCTCA	21	Sc0002143	-	77911	78084	aaaaatgcttggaacctctcattttttttgagatcccCACAGCCCCCTTTAGATCTCAaccattgatgtatgtgtgggacccattaatatatgtttggggcctatcctatcaatggttgagatccaaagggggttgcgggggtctccaaaaaaaagagagtctcaatcattgtt	5'	New	gp4	...((((.(((..(.(((((.(((((((.(((((((((.(((((((((((.(((((((((((((((((.....(((((.((((............)))).)))))..))))))))))))))))).))))))))))).))))))))).))))))).))))))..))).))))...	168	42.5	-94.6	1.3	30	26.5	30	50	64.5	111.5	30.8924	22.817	32.193	64.852	64.1703	87.8926	middle
186	153	PC-3p-66999_27	TCAATCACATAATGCACCACT	21	Sc0001374	+	250152	250318	caacaagaatcctctagagtgtttttttcttaaagtttcttaaagtagtggattgtgtggttgagatttaatgttgaaaaattgatatgacttgtcattaaataTCAATCACATAATGCACCACTctaagaaatttaaaaaaaaaaaactctagagaatccttgctc	3'	New	gp4	...((((.((.(((((((((.(((((((.((.((((((((((.(((.(((.(((((((((((((.((((((((.......((....)).......)))))))).))))))))))))).))).))).)))))))))))).))))))).))))))))).)).))))...	161	28.7	-60.6	1.3	0	0	0	1.5	9	3	0	0	0	1.94556	8.954	2.36482	low
187	153	PC-3p-66999_27	TCAATCACATAATGCACCACT	21	Sc0001680	+	22862	23021	aaggatcctctaaagtatttttttcctaaagtttcttaaagtggtgtattgtgtgattcagatttaatgttgaaaaattgatgtgacttgtcattaaatcTCAATCACATAATGCACCACTctaggaaattttaagaaaaaaaaactctagaggattatt	3'	New	gp4	...(((((((((.(((.((((((((.((((((((((((.(((((((((((((((((((.((((((((((.......((....)).......)))))))))).))))))))))))))))))).)))))))))))).)))))))).))).)))))))))...	154	28.1	-74.4	1.7	0	0	0	1.5	9	3	0	0	0	1.94556	8.954	2.36482	low
188	154	PC-3p-115569_14	AAAGGTCACAAGTCTTTCATGATC	24	Sc0001406	+	132108	132245	catgaaattcttttcatgaaaatgatcatgaaaaatttgtgacccttagattactttgattagtatgtggtgttttattctaagtgtaatccAAAGGTCACAAGTCTTTCATGATCattttcatgaaggactttccat	3'	New	gp4	...((((.((.((((((((((((((((((((((.((((((((((.((.((((((.....((((.(((........))).))))..)))))).)).)))))))))).)))))))))))))))))))))))).))))...	132	30.4	-57.2	1.4	3.5	2	1.5	0	0	1.5	3.60411	1.72204	1.60965	0	0	1.18241	low
189	154	PC-3p-115569_14	AAAGGTCACAAGTCTTTCATGATC	24	Sc0004169	+	101594	101768	atgagaaatgttagggatcatgaaatttttttcatgaaaatgattatgaaatatttgtgatccttagattaccttgattagtgtgtggtgttttattctaaatataatccAAAGGTCACAAGTCTTTCATGATCattttcatgaaagacttttcatgatacctagcattgctgtt	3'	New	gp4	...((.(((((((((.(((((((((..((((((((((((((((((((((((.((((((((.((((.(((((......((((..((........))..))))...)))))..)))))))))))).))))))))))))))))))))))))..))))))))).))))))))).))...	169	29.1	-71.5	1.4	3.5	2	1.5	0	0	1.5	3.60411	1.72204	1.60965	0	0	1.18241	low
190	155	PC-3p-126481_12	TTCCCTTTCCAAATCCCCCAT	21	Sc0000001	-	3462749	3462915	tttatgctgtgtttggttagaggatttggggagggatttggaaagggaaagggaaaatgtgtgtgaaactatgtgaaatttaggcatattttattctcatttcacctaccttttccatTTCCCTTTCCAAATCCCCCATcaaatcctccaaccaaacacagcattag	3'	New	gp4	...(((((((((((((((.((((((((((((.((((((((((((((((((.((((((.((..((((((....(((((((........))))))).....))))))..)).)))))).)))))))))))))))))))).)))))))))).)))))))))))))))...	161	38.9	-92.3	1.4	2	1.5	1.5	2.5	3	0	2.05949	1.29153	1.60965	3.2426	2.98467	0	low
191	155	PC-3p-126481_12	TTCCCTTTCCAAATCCCCCAT	21	Sc0001391	+	79918	80084	ttaatgctgtgtttggttggaggatttggggagggatttggaaaggaaaagggaaaagatgtgtgaaactaggtgaaatgtaagtatattttgttcacattttacctaacttttccttTTCCCTTTCCAAATCCCCCATcaaatcctccaaccaaacacagcgtaaa	3'	New	gp4	...((((((((((((((((((((((((((((.((((((((((((((.(((((((((((..((.....))((((((((((((.(..(.....)..).)))))))))))).))))))))))).)))))))))))))))).))))))))))))))))))))))))))...	161	38.3	-98.9	1.5	2	1.5	1.5	2.5	3	0	2.05949	1.29153	1.60965	3.2426	2.98467	0	low
192	156	PC-5p-83175_21	TTATGGATTTGGGTAGGTATT	21	Sc0003831	-	31166	31276	ccaaggttgtgttcagaTTATGGATTTGGGTAGGTATTtggaaagagaaaggacatttttctttacctttccaaaTGTCTACTCAAATCCATGATCcaaacacaacctaag	5'	New	gp4	...((((((((((..((((((((((((((((((..((((((((((..((((((.....))))))..))))))))))..))))))))))))))))))..))))))))))...	105	36.9	-63.2	1.5	4	0	6	0	7	4	4.11899	0	6.4386	0	6.96422	3.1531	low
192	157	PC-3p-124316_13	TGTCTACTCAAATCCATGATC	21	Sc0003831	-	31166	31276	ccaaggttgtgttcagaTTATGGATTTGGGTAGGTATTtggaaagagaaaggacatttttctttacctttccaaaTGTCTACTCAAATCCATGATCcaaacacaacctaag	3'	New	gp4	...((((((((((..((((((((((((((((((..((((((((((..((((((.....))))))..))))))))))..))))))))))))))))))..))))))))))...	105	36.9	-63.2	1.5	0	2	2	0	2.5	0	0	1.72204	2.1462	0	2.48722	0	low
193	158	PC-3p-135015_11	AACAACGTCGTTTTGGTCAATTCG	24	Sc0000811	-	206760	206841	ccaggctcgaattgaccaaaacgacgtcgttttggacacaaaacaacacaaAACAACGTCGTTTTCGTCAATTCGagccatt	3'	New	gp4	...(((((((((((((.((((((((((.((((((..............)))))).)))))))))).)))))))))))))...	76	43.9	-44.1	1.2	9	1.5	2	0	0	0	9.26772	1.29153	2.1462	0	0	0	low
194	158	PC-3p-135015_11	AACAACGTCGTTTTGGTCAATTCG	24	xpSc0053759	+	56854	56965	ccaggctcgaatggctcgaattgaccaaaacgacgtcgttttggacacaaaacgacgtcgttttggacacaaAACAACGTCGTTTTGGTCAATTCGagccatttgagccgcg	3'	New	gp4	...(((((((((((((((((((((((((((((((((.((((((....(((((((....)))))))....)))))).)))))))))))))))))))))))))))))))))...	106	49.1	-78.9	1.4	9	1.5	2	0	0	0	9.26772	1.29153	2.1462	0	0	0	low
195	159	PC-5p-190570_7	ATGGCTGAGATCAACCGTTGCAAC	24	Sc0000159	-	351364	351519	actcctccttacaatcctccttgctATGGCTGAGATCAACCGTTACAACatccaacagccataaaaaataaaaaataaaaaaaaagaaaataaagaaattgaaatcagccgttggatgttgaaatggctgatctcaaccgttgcaaggaggattgc	5'	New	gp4	...........(((((((((((((.((((.((((((((.(((((.(((((((((((.((................................................)).))))))))))).))))).)))))))).)))).))))))))))))).	144	37.2	-65.593	1.1	7.5	3	0	0	0	0	7.7231	2.58306	0	0	0	0	low
196	159	PC-5p-190570_7	ATGGCTGAGATCAACCGTTGCAAC	24	Sc0004076	-	145470	145626	tcccctctttgcaaccctccttgcaACGGCTGAGATCAACCGTTGCAACaaccaacggctgatttcaatttctttatttatttttatttttttttatggctgttggatattgcaacggttaatctcagccgttgcaaggaagattgcaaagaggagt	5'	New	gp4	...(((((((((((...(((((((((((((((((((.(((((((((((...(((((((((.....................................)))))))))...))))))))))).)))))))))))))))))))...)))))))))))...	151	40.8	-85.274	1.3	7.5	3	0	0	0	0	7.7231	2.58306	0	0	0	0	low
197	160	PC-3p-41907_45	ATTTGAGCCACAGAATTTGGACCC	24	Sc0004843	-	74392	74558	atatatgaaaaatgtttgggggccctaattctgtggctcaaatgtggctcaaatggccaaaacgacgtcgttttggccattttgatgttgttttgtactcaaaacgacgtcgttttggccATTTGAGCCACAGAATTTGGACCCtctaccattgctctatatatata	3'	New	gp4	((((((((..((((...(((((.((.(((((((((((((((..((((((.((((((((((((((....)))))))))))))).((((((((((((....)))))))))))).....))))))))))))))))))))).)).)))))...))))..)).))))))...	164	40.7	-87.3	1.3	12.5	7.5	2	0	0	6.5	12.8718	6.45764	2.1462	0	0	5.12378	middle
198	160	PC-3p-41907_45	ATTTGAGCCACAGAATTTGGACCC	24	xfSc0003469	+	16881	17037	aaagaaaaatgtttgggggccctaattctgtggctcaaatgtggctcaaatggccaaaacgacgtcgttttggccattttgatgttgttttgtactcaaaacgacgtcgttttgaccATTTGAGCCACAGAATTTGGACCCtctaccattgctcctc	3'	New	gp4	...((..((((...(((((.((.((((((((((((((((((......((((((((((((((....)))))))))))))).((((((((((((....))))))))))))........)))))))))))))))))).)).)))))...))))..))...	151	43.9	-80.8	1.2	12.5	7.5	2	0	0	6.5	12.8718	6.45764	2.1462	0	0	5.12378	middle
199	161	PC-5p-108604_15	TGTGCACAAAATCCGATCACT	21	xfSc0000101	+	292685	292783	tcttctaTGTGCACAAAATCCGATCACAcaactgcacacaactttctcgttgttatggttgtgtctggttctgCGATCGGATTGTGTGCACGTAgactt	5'	New	gp4	...((((((((((((.(((((((((.((.((((..((((((((.............))))))))..)))).)).))))))))).))))))))))))...	93	44.4	-48.8	1.1	3	11	11	0	0	0	3.08924	9.4712	11.8041	0	0	0	middle
199	162	PC-3p-1726_961	CGATCGGATTGTGTGCACGTA	21	xfSc0000101	+	292685	292783	tcttctaTGTGCACAAAATCCGATCACAcaactgcacacaactttctcgttgttatggttgtgtctggttctgCGATCGGATTGTGTGCACGTAgactt	3'	New	gp4	...((((((((((((.(((((((((.((.((((..((((((((.............))))))))..)))).)).))))))))).))))))))))))...	93	44.4	-48.8	1.1	392	443	505	102	94	173	403.661	381.431	541.916	132.298	93.5195	136.371	middle
200	163	PC-3p-130819_12	AAATCCCTCCTTAAATCTCTCAAC	24	Sc0000177	+	961427	961580	gtgtttggttgaagaatttggagagggatttggaaagggaaagagaaaaggtgtgtaaaactaggtgaaatataaacatgttttattcacaattcacttaccttttccatttcccttttcAAATCCCTCCTTAAATCTCTCAACcaaacacaac	3'	New	gp4	((((((((((((((.(((((..((((((((((((((((((((..(((((((((((.........(((((((((....)))))))))........)))..))))))))..))))))))))))))))))))..))))))).))))))))))))...	151	35.1	-73.3	1.4	6.5	1.5	1.5	0	0	1.5	6.69336	1.29153	1.60965	0	0	1.18241	low
201	163	PC-3p-130819_12	AAATCCCTCCTTAAATCTCTCAAC	24	Sc0003456	+	34750	34903	gtgtttggttgagggatttgaggagggatttggaaagggaaatggaaaaggtaagtgaaatgtgaaaaaaatatacttacatttcacatagtttcacacaccttttttcttttcctttccAAATCCCTCCTTAAATCTCTCAACcaaacacaac	3'	New	gp4	((((((((((((((((((((((((((((((((((((((((((..((((((((..(((((((((((((..............))))))))...)))))..))))))))..))))))))))))))))))))))))))))))))))))))))))...	151	35.7	-95.1	1.7	6.5	1.5	1.5	0	0	1.5	6.69336	1.29153	1.60965	0	0	1.18241	low
202	164	PC-3p-53928_35	AATTTTGAGCCATTGTGACCACAA	24	xfSc0020765	+	1029	1188	gaaaatgtttgtgggtcacaatttttgtgaccacaatggctcaaaactgtcaaaacgatatcgttttgggtgcaaaatatatcaaaacatgccaaaatgacgtcgttttgacAATTTTGAGCCATTGTGACCACAAaaattatgaccctctagcattatt	3'	New	gp4	...((((((...((((((.((((((((((..(((((((((((((((.(((((((((((..((((((((((((...............))).)))))))))..))))))))))).)))))))))))))))..)))))))))).))))))...))))))...	154	35.6	-81	1.4	8.5	5.5	2	0	1.5	0	8.75285	4.7356	2.1462	0	1.49233	0	low
203	164	PC-3p-53928_35	AATTTTGAGCCATTGTGACCACAA	24	xpSc0057597	+	6062	6209	aaaaatgtttgagggtcacaatttttgtagtcacaatggttcaaaacttctaaaacgacgtcgttttgagtacaaaacatgctaaaacgacatcattttaatAATTTTGAGCCATTGTGACCACAAaaattataaccctagcattgtt	3'	New	gp4	...((((((..(((((...(((((((((.(((((((((((((((((....(((((.((.((((((((.((((.......)))))))))))).)).)))))....))))))))))))))))).)))))))))...)))))))))))...	142	31.8	-58.7	1.2	8.5	5.5	2	0	1.5	0	8.75285	4.7356	2.1462	0	1.49233	0	low
204	165	PC-3p-30369_63	TTTTCGGACCATTTGAGCCAC	21	Sc0001121	+	360062	360211	tgattgatggccacaaattctgtggcttaaatggcccgaaaatgtcaaaacgacgttattttgagtacaaaacaactctgaaaatgtcaaaacgacgtcgttttggcaTTTTCGGACCATTTGAGCCACagaatttgtggccatcaaaca	3'	New	gp4	.(.(((((((((((((((((((((((((((((((.(((((((((((((((((((((..((((((......................))))))..))))))))))))))))))))).))))))))))))))))))))))))))))))).).	148	40	-96.3	1.6	6	9.5	3.5	6	5	7.5	6.17848	8.17967	3.75585	7.78224	4.97444	5.91206	low
205	165	PC-3p-30369_63	TTTTCGGACCATTTGAGCCAC	21	Sc0001447	+	23128	23293	aaaggaaaatgtttggtggtcacaaattctgtggctcaaatgactcgaaaatgccaaaacaatcattttggcattttcagagttgttttgtccccaaaacgacgtcgttttggcaTTTTCGGACCATTTGAGCCACagaatttgtggctaccaatcattgcccatg	3'	New	gp4	...((..((((.((((((((((((((((((((((((((((((..((((((((((((((((......(((((.....)))))(((((((((....)))))))))...))))))))))))))))..)))))))))))))))))))))))))))))).))))..))...	160	41	-92.4	1.4	6	9.5	3.5	6	5	7.5	6.17848	8.17967	3.75585	7.78224	4.97444	5.91206	low
206	166	PC-5p-113145_14	ATCGGATATCAATAACTGTGTGGT	24	Sc0000542	-	232821	232988	aggattcgttaagtacttaatgcctatcaaaaattatattcATCGGATATCAATAACTGTGTGATcggattgcatatttttttatgctattttttaaaagaaaaacttattgttttttttttttgtcataaatgtaatttgattatataattattgatatccgattaa	5'	New	gp4	(((...((((((....)))))))))................(((((((((((((((.(((((((((..(((((((......((((((........(((((((((((.....)))))))))))..).))))))))))))..))))))))).)))))))))))))))...	124	22	-49	1.3	7	3	0	0	0	0	7.20823	2.58306	0	0	0	0	low
207	166	PC-5p-113145_14	ATCGGATATCAATAACTGTGTGGT	24	Sc0001689	-	360964	361140	tcaagtactatatgtctgtaaaaaatcatcttgATCGGATATCAATAACTGTGTGATcaaaatagttttttatcaaccgttaagttgttcaccatttatttttttttacaaaactgatttgattatataactatcaatatctgatcaacatgatttttcatgtaaatatagtactcg	5'	New	gp4	...((((((((((....((.(((((((((.((((((((((((..(((..((((((((((((..((((((.((........(((((........)))))........)).))))))..))))))))))))..)))..)))))))))))).))))))))).))....))))))))))..	172	25.4	-51.5	1.1	7	3	0	0	0	0	7.20823	2.58306	0	0	0	0	low
208	167	PC-3p-108397_15	TTCCAAACACCTCCTCAAATCCCT	24	Sc0001005	+	621423	621579	ggtgtgtttggttggaggatttggggagggatttggaaagggaaagggaaaaggtttgtgaaactatgtgaaatttaggcatgttttattcatatttcacctaccttttccatttccctTTCCAAACCCCTCCTCAAATCCCTcaaccaaacacaac	3'	New	gp4	..((((((((((((..((((((((((((((.((((((((((((((.(((((((((..((((((.((((((((((........))))))..))))))))))..))))))))).)))))))))))))).))))))))))))))..))))))))))))..	153	41.4	-96.1	1.5	8.5	2	0	0	0	0	8.75285	1.72204	0	0	0	0	low
209	167	PC-3p-108397_15	TTCCAAACACCTCCTCAAATCCCT	24	Sc0002371	-	189692	189847	gtttggttgggggatttaggaagagatttggaaagggaaagagaaagggaaaaggtatgtgaaactatgtgaaatgtaggcatatttttttcacatttcacctatcttttccatttctctTTCCAAATACCTCCTCAAATCCCTcaaccaaacata	3'	New	gp4	(((((((((((((((((((((.(..(((((((((((((((.......((((((((((.(((((...((((((((..............))))))))))))).)))))))))).)))))))))))))))..))))).)))))))))))))))))...	153	36.5	-73.9	1.3	8.5	2	0	0	0	0	8.75285	1.72204	0	0	0	0	low
210	168	PC-3p-86744_20	ATTTTGAGCCATTGTGACCACAAA	24	Sc0000768	+	402980	403140	tgcttcgacaggatggaaaacnataatttttgtggtcacaatggttcaaaattgtcaaaacgatattgttttgacatgttttgcacccaaaacgatgttgttttgacaATTTTGAGCCATTGTGACCACAAAaattgtgaccctctagcattgttgaaact	3'	New	gp4	...((((((((..((((.....(((((((((((((((((((((((((((((((((((((((((((((((((((...((.....))..))))))))))))))))))))))))))))))))))))))))))))))))))).....))))...))))))))...	155	35.4	-85.9	1.5	11	3.5	3	0	1.5	0	11.3272	3.01356	3.2193	0	1.49233	0	middle
211	168	PC-3p-86744_20	ATTTTGAGCCATTGTGACCACAAA	24	xfSc0038052	+	552	681	caagagggccacaatttttgtggtcacaatggctcaaaactgccatgagcatgataagtgttttgcacccaaaacgacgtcgttttgacaATTTTGAGCCATTGTGACCACAAAaattgtgcccctcaaa	3'	New	gp4	...(((((.((((((((((((((((((((((((((((((.(((...((((((.....)))))).)))..(((((((....)))))))....)))))))))))))))))))))))))))))).)))))...	124	43.1	-73.3	1.3	11	3.5	3	0	1.5	0	11.3272	3.01356	3.2193	0	1.49233	0	middle
212	169	PC-3p-43207_44	ATACAACACACCACTCTAGGAAAC	24	Sc0001728	+	337294	337461	caccaaggatcctctagagtttttttttcctaaagtttcctaaagtggtgtgttgtatgggtgagatttaatgctaaaaaattgatgtgacttgtcattaaatctcaaccATACAACACACCACTCTAGGAAACcttaggaaaaaaaaactctagaggatccttgctc	3'	New	gp4	...((((((((((((((((((((((((((((((.((((((((.(((((((((((((((((.(((((((((((((...................).)))))))))))).))))))))))))))))).)))))))).))))))))))))))))))))))))))))))...	162	36.3	-106.6	1.7	12.5	3.5	2.5	1.5	0	2	12.8718	3.01356	2.68275	1.94556	0	1.57655	middle
213	169	PC-3p-43207_44	ATACAACACACCACTCTAGGAAAC	24	xfSc0001196	+	27753	27919	caccaaggatcctctagagtttttttccctagagtttcctaaagttgtgtgttgtatgggtgagatttaatgctaaaaaattgatgtgacttgtcattaaatctcaaccATACAACACACCACTCTAGGAAACtttagggaaaaaaaactctagaggatccttgctc	3'	New	gp4	...((((((((((((((((((((((((((((((((((((((.(((.(((((((((((((.(((((((((((((...................).)))))))))))).))))))))))))).))).))))))))))))))).)))))))))))))))))))))))...	161	37.1	-102	1.6	12.5	3.5	2.5	1.5	0	2	12.8718	3.01356	2.68275	1.94556	0	1.57655	middle
214	170	PC-3p-78564_23	AAATCTCTCCTCAAATCTCACAGC	24	Sc0001702	-	294923	295076	gtgtttggttgggggatttggagagggatttgaaaagggaaagataaaaggtgtgtaaaagtaggtgaaatttaggcatgttttattcacatttcacctaccttttctatttccttttccAAATCTCTCCTCAAATCTCCCAGCcaaacacagc	3'	New	gp4	((((((((((((((((((((..((((((((((.(((((((((...((((((((((.(((.((..(((((((........)))))))..)).))))))..)))))))...))))))))).))))))))))..))))))))))))))))))))...	151	39	-78.7	1.3	7.5	6	1.5	0	0	1.5	7.7231	5.16611	1.60965	0	0	1.18241	low
215	170	PC-3p-78564_23	AAATCTCTCCTCAAATCTCACAGC	24	Sc0006088	-	371	524	gtgtttggttgggggatttagggagggatttgaaaaggaaaagggaaaaagcgtgtgaaactatgtgaaatataggcgtgatttatttacatttcacctatattttttattttcctttctAAATCTCTCCTCAAATCTCCCAGCcaaacacaat	3'	New	gp4	(((((((((((((((((((..((((((((((..(((((((((..((((((....((((((((((((...))))))..((((.....)))).)))))).....)))))).)))))))))..))))))))))..)))))))))))))))))))...	151	35.7	-72.6	1.3	7.5	6	1.5	0	0	1.5	7.7231	5.16611	1.60965	0	0	1.18241	low
216	171	PC-3p-149870_10	AAGGATCACAAAGCTTTCATGATT	24	Sc0000717	+	58183	58345	aaagttagggatcatgaaaattttttcatgaaaatgatcatgaaagatttatgatccttgcattaccttaattagtatgtggtcctttattctaagtgtaatccAAGGATCACAAAGCTTTCATGATTattttcatgaaaggtttttcatgatacctaacatt	3'	New	gp4	...((((((.((((((((((..((((((((((((((((((((((((.(((.(((((((((.(((((((((...((((..........)))).)))).))))).))))))))).))).))))))))))))))))))))))))..)))))))))).))))))...	157	28.8	-73.4	1.6	3.5	1.5	0	0	0	0	3.60411	1.29153	0	0	0	0	low
217	171	PC-3p-149870_10	AAGGATCACAAAGCTTTCATGATT	24	Sc0001413	+	480769	480931	aaagttagggatcatgaaaaaattttcatgaaaatgatcatgaaaaatttatgatccttggattaccttgattagtgtatggtactttattctaagtgtaatccAAGGATCACAAAGCTTTCATGATTattttcatgaaaggtttttcatgatacctagcatt	3'	New	gp4	...((((((.(((((((((((..((((((((((((((((((((((..(((.((((((((((((((((((((..((((.....))))....)).))).))))))))))))))).)))..))))))))))))))))))))))..))))))))))).))))))...	157	28.8	-80.9	1.7	3.5	1.5	0	0	0	0	3.60411	1.29153	0	0	0	0	low
218	172	PC-3p-77796_23	TTGAGCCATTTGAGCTATTGT	21	Sc0000820	+	72877	73012	tttgagggccacaaaaacagtggctcaaatggcttaaaactgccaaaacgatgtcgttttggcaagttttgctctcaaaacgacgtcgttttgacagttTTGAGCCATTTGAGCCATTGTttttgtggccctctac	3'	New	gp4	...(((((((((((((((((((((((((((((((((((((((.((((((((((((((((((((((...))))...)))))))))))))))))).)))))))))))))))))))))))))))))))))))))))...	130	43.4	-101.1	1.7	0	0	0	2	3.5	6	0	0	0	2.59408	3.48211	4.72964	low
219	172	PC-3p-77796_23	TTGAGCCATTTGAGCTATTGT	21	Sc0002324	+	185105	185254	aaaaatgtttgagggccacaaaaacagtggctcaaatggctcaaaactgtcaaaatgacatcgttttggcagattttgggcccaaaacgacgtcgttttagcagttTTGAGCCATTTGAGCCATTGTttttgtggccctctaccattgct	3'	New	gp4	...((((...(((((((((((((((((((((((((((((((((((((((..((((((((.((((((((((.........).))))))))).))))))))..)))))))))))))))))))))))))))))))))))))))...))))...	144	42.7	-100	1.6	0	0	0	2	3.5	6	0	0	0	2.59408	3.48211	4.72964	low
220	173	PC-5p-67956_27	GGGCTTGGTGGCTTGGAAAGC	21	xfSc0003363	-	351	519	ttgggaagtgatgagaaacgggggatgaatatttgccgaaaatctttgGGGATTGGTGGCTTGGAAAGCttcgttcttttctcttttgaatgaatttaatggcTTTCCAAGTCCACCCATTCCTAttgttttcggtcttctctctcctttctcttctttcgcttcttca	5'	New	gp4	...((((((((.((((((.((((((.(((.....(((((((((...(((((((.((((((((((((((((((((((...........)))))).......))))))))))).))))).)))))))..))))))))).))))))))).)))))).....))))))))...	163	41.4	-73	1	16	14	17	16	3	8	16.476	12.0543	18.2427	20.7526	2.98467	6.30619	middle
220	174	PC-3p-721_2531	TTTCCAAGTCCCCCCATTCCTA	22	xfSc0003363	-	351	519	ttgggaagtgatgagaaacgggggatgaatatttgccgaaaatctttgGGGATTGGTGGCTTGGAAAGCttcgttcttttctcttttgaatgaatttaatggcTTTCCAAGTCCACCCATTCCTAttgttttcggtcttctctctcctttctcttctttcgcttcttca	3'	New	gp4	...((((((((.((((((.((((((.(((.....(((((((((...(((((((.((((((((((((((((((((((...........)))))).......))))))))))).))))).)))))))..))))))))).))))))))).)))))).....))))))))...	163	41.4	-73	1	2099	1769	3277	2911	745	1031	2161.44	1523.14	3516.55	3775.68	741.192	812.711	high
221	175	PC-3p-144773_10	AAATCCCTCCCCAAATCCCCAACC	24	Sc0000488	+	351125	351276	atgtttggttggagaatttgaggagggatttgaaaagaaaaatggaaaaagtagatgaaatgtgaataaaacatgcctatatttcacctaatttcacacaacttttccctttccctttccAAATCCCTCCCCAAATCCCCAACCaaacacaa	3'	New	gp4	.(((((((((((.(.(((((.(((((((((((.((((..(((.((((((.((...(((((((((((................)))))...))))))....)))))))).)))..)))).))))))))))).)))))).)))))))))))...	148	36.2	-57.2	1	3.5	1.5	0	0	0	0	3.60411	1.29153	0	0	0	0	low
222	175	PC-3p-144773_10	AAATCCCTCCCCAAATCCCCAACC	24	Sc0002090	+	108535	108685	aacgctgtgtttggtaggggggtttgaggagggaattggaaaggaaaagggaaaagttaggtgaaatgtgaatatatttcacctagtttcacacacattttccctttccctttccAAATCCCTCCCCAAATCCCCAACCaaacacggcata	3'	New	gp4	...((((((((((((..(((((((((.(((((((.(((((((((.((((((((((.....((((((((((((.....)))))...))))))).....)))))))))).))))))))).))))))).))))))))).))))))))))))...	145	43.7	-92.3	1.4	3.5	1.5	0	0	0	0	3.60411	1.29153	0	0	0	0	low
223	176	PC-3p-93527_18	ATCAATGGTTGAGATTCAAAGGGA	24	Sc0002520	-	92039	92209	aaaaatgtttgggaccccctttttttggagacctacacaagcccctttggatctcaaccattgatgtatttgtgggacccactcatgtatgtatggagcccacaccATCAATGGTTGAGATTCAAAGGGAgttgtggaggtctccaaaaaaagggggtctcaatcattgat	3'	New	gp4	...((((.((((((((((((((((((((((((((.(((((..((((((((((((((((((((((((....((((((..(((..((....))..)))..)))))).))))))))))))))))))))))))..))))).)))))))))))))))))))))))))).))))...	165	44.4	-114.8	1.5	7.5	2.5	0	0	0	2	7.7231	2.15255	0	0	0	1.57655	low
224	176	PC-3p-93527_18	ATCAATGGTTGAGATTCAAAGGGA	24	Sc0004190	-	91635	91712	caaaccccttttggatcttaactattaatgtatatgtgggacccacaccATCAATGGTTGAGATTCAAAGGGGgtccc	3'	New	gp4	...(((((((((((((((((((((((.(((....(((((...))))).))).)))))))))))))))))))))))...	72	43.6	-39.3	1.2	7.5	2.5	0	0	0	2	7.7231	2.15255	0	0	0	1.57655	low
225	177	PC-3p-59223_31	CAAAAATTGCGACCCTCTAAT	21	Sc0000214	+	730952	731098	aatgtttgagggtcataatttttgtggccacaatggctcaaaagtgtcaaaacgacgtcgttttgggtgcaaaacatgctaaaacgacgtcgttttgacagttttgagtcattgtggtcaCAAAAATTGTGACCCTCTAATattgtt	3'	New	gp4	((((((.((((((((((((((((((((((((((((((((((((.(((((((((((((((((((((((((.....))).)))))))))))))))))))))).)))))))))))))))))))))))))))))))))))).))))))...	144	38.8	-102.9	1.8	5.5	5.5	0	0	2.5	2	5.66361	4.7356	0	0	2.48722	1.57655	low
226	177	PC-3p-59223_31	CAAAAATTGCGACCCTCTAAT	21	Sc0000387	-	853475	853621	aatgtttgagggtcacaatttttgtggccacaatggttcaaaactgccaaaacgacgtcgttttgggtgcaaaacatgccaaaacgacgtcattttgacagttttgaaccattgtggccaCAAAAATTGTGACCCTCTAATattgtt	3'	New	gp4	((((((.(((((((((((((((((((((((((((((((((((((((.(((((.((((((((((((((((.....))).))))))))))))).))))).))))))))))))))))))))))))))))))))))))))).))))))...	144	40.1	-103.3	1.8	5.5	5.5	0	0	2.5	2	5.66361	4.7356	0	0	2.48722	1.57655	low
227	178	PC-5p-101504_17	ATTATGACCCTTGGATTACCTTGA	24	Sc0001213	+	196942	197118	taagagaaaagctagggatcatgaaaaatttttcatgaaaatgatcatgaaagaATTATGACCCTTGGATTACCTTGAttagtgtgtggtgctttattttaagtgtaatccaagggtcataaatctttcatgatcattttcatgaaagttttttcatgatacctagtattgctcaat	5'	New	gp4	...(((....((((((.(((((((((((..((((((((((((((((((((((((.(((((((((((((((((((((((..(((.......))).....))))).)))))))))))))))))).))))))))))))))))))))))))..))))))))))).))))))....)))...	171	30.5	-96.7	1.8	2.5	3.5	0	0	0	2.5	2.57437	3.01356	0	0	0	1.97069	low
228	178	PC-5p-101504_17	ATTATGACCCTTGGATTACCTTGA	24	xpSc0055371	+	5057	5235	cttagagaaaagttagggatcatgaaaattttttcatgaaaatgatcatgaaagaATTATGACCCTTGGATTACCTTGAttagtgtgtggtgctttattttaagtgtaatccaagggtcataaatctttcatgatcattttcatgaaagttttttcatgatacctagtattgctctttc	5'	New	gp4	...((((.((..(((((.((((((((((..(((((((((((((((((((((((((.(((((((((((((((((((((((..(((.......))).....))))).)))))))))))))))))).)))))))))))))))))))))))))..)))))))))).)))))..)).))))...	173	30.7	-94.6	1.7	2.5	3.5	0	0	0	2.5	2.57437	3.01356	0	0	0	1.97069	low
229	179	PC-3p-27014_70	ATTTGAGCCACAAAATTTGGGCCC	24	Sc0000127	+	576198	576347	tttgggggccttaattctgtggctcaaatatggttcaaatggccaaaacgacgtcgttttggccattttgatgttgttttgtactcaaaacgacgtcgttttggccatttgagccacATTTGAGCCACAAAATTTGGGCCCtctaccatt	3'	New	gp4	...(((((((..((((.((((((((((((.((((((((((((((((((((((((((((((((..((...(((...)))..))..)))))))))))))))))))))))))))))))).)))))))))))).))))..))))))).......	140	43.3	-92.9	1.4	20.5	11.5	4.5	0	0	3.5	21.1098	9.90171	4.82895	0	0	2.75896	middle
230	179	PC-3p-27014_70	ATTTGAGCCACAAAATTTGGGCCC	24	Sc0004041	+	93216	93370	atgtttgagggccctaattctgtggctcaaatgtggctcaaatggccaaaacgacgtcgttttggccattttgatgttgttttgtactcaaaacgacgtcgttttggccatttgagccacATTTGAGCCACAAAATTTGGGCCCtctaccattac	3'	New	gp4	(((...((((((((.((((.(((((((((((((((((((((((((((((((((((((((((((((..((...(((...)))..))..))))))))))))))))))))))))))))))))))))))))))))).)))).))))))))...)))...	152	44.5	-105	1.5	20.5	11.5	4.5	0	0	3.5	21.1098	9.90171	4.82895	0	0	2.75896	middle
231	180	PC-3p-13050_141	ATTTGAGCCATTTGAGTCACC	21	Sc0000201	-	504086	504235	gataatgttaggtagttcaaatttttgtagttcaaatagctcaaatctgtcaaaacgacgtcgttttgacagattttaagtgtaaaacgacgtcgttttgacagATTTGAGCCATTTGAGTCACAaaaatttgagctaccaaacattttc	3'	New	gp4	((.((((((.((((((((((((((((((..(((((((.((((((((((((((((((((((((((((((((.........)).)))))))))))))))))))))))))))))).)))))))..)))))))))))))))))).)))))).))	150	33.3	-89.1	1.8	2.5	2	2	17.5	19.5	27	2.57437	1.72204	2.1462	22.6982	19.4003	21.2834	middle
232	180	PC-3p-13050_141	ATTTGAGCCATTTGAGTCACC	21	Sc0002147	-	206251	206430	taatatttgtaaacaacaatgctaggtaacttaaaattttgtagctcaaatggctcaaatccctcacaacgacgtcattttgagtgtaaatgaatgtaaaacgacgtcgttttgacagATTTGAGCCATTTGAGTCACAaaattttgagctaccaaacattttcctattcgtaaataaca	3'	New	gp4	...((((((..((....((((...((((.(((((((((((((..(((((((((((((((((..(((.(((((((((.(((((..(........)..))))).))))))))).)))..)))))))))))))))))..))))))))))))).))))...))))......))..))))))...	174	32.8	-71.6	1.2	2.5	2	2	17.5	19.5	27	2.57437	1.72204	2.1462	22.6982	19.4003	21.2834	middle
233	181	PC-5p-509535_3	AGCATGGTGACTTGATGGCGT	21	Sc0001641	-	149459	149720	cacaaaagcaacaagAGCATGGTGACTTGATGGCGCacctgaagagtatcgatgacaagctcgatttaatggcgacttgatggcaattcaaatcgagcttgtcatcgatactctttaggcACGCCATCAAGTCGCCATGCTCttgttgcttttgtgtcgccacgaaaaaaatgcttctcaatagcgtgctaatcgagataccaatggagagatgctcaagcccaaattagtgtcggagtgattgccaccaaggaagaggagg	5'	New	gp4	(((((((((((((((((((((((((((((((((((..(((((((((((((((((((((((((((((((((.((.........)).))).))))))))))))))))))))))))))))))..)))))))))))))))))))))))))))))))))))((((..(((.....(((((.......))))).....))).(((((.(((((.(((...)))....)))..)).)))))...))))...((.((........)).))	156	46.6	-138.2	1.1	0	0	0	1.5	1.5	1.5	0	0	0	1.94556	1.49233	1.18241	low
233	182	PC-3p-27873_68	ACGCCATCAAGTTGCCATGCTC	22	Sc0001641	-	149459	149720	cacaaaagcaacaagAGCATGGTGACTTGATGGCGCacctgaagagtatcgatgacaagctcgatttaatggcgacttgatggcaattcaaatcgagcttgtcatcgatactctttaggcACGCCATCAAGTCGCCATGCTCttgttgcttttgtgtcgccacgaaaaaaatgcttctcaatagcgtgctaatcgagataccaatggagagatgctcaagcccaaattagtgtcggagtgattgccaccaaggaagaggagg	3'	New	gp4	(((((((((((((((((((((((((((((((((((..(((((((((((((((((((((((((((((((((.((.........)).))).))))))))))))))))))))))))))))))..)))))))))))))))))))))))))))))))))))((((..(((.....(((((.......))))).....))).(((((.(((((.(((...)))....)))..)).)))))...))))...((.((........)).))	156	46.6	-138.2	1.1	10	4	4	7.5	9	5.5	10.2975	3.44407	4.2924	9.72779	8.954	4.33551	middle
234	183	PC-3p-17716_106	CATACAACGCACCACTCTAGA	21	Sc0002144	-	127549	127712	ctaaggatcctctagagtttttttttcctaaagtttcctaaagtggtgtgttgtatgggtgagatttaatgctaaaaaattgatgtgacttgtcattaaatctcaacCATACAACACACCACTCTAGAaaactttagggaaaaaaaactctagaggatcctcgc	3'	New	gp4	...(((((((((((((((((((((((((((((((((.(((.(((((((((((((((((.(((((((((((((...................).)))))))))))).))))))))))))))))).))).)))))))))))))))))))))))))))))))))...	158	35.4	-99.9	1.7	21.5	18.5	14.5	11	5.5	10.5	22.1396	15.9288	15.56	14.2674	5.47189	8.27688	middle
235	183	PC-3p-17716_106	CATACAACGCACCACTCTAGA	21	Sc0003082	-	228862	229029	caccaagcatcctctagagtttttttttcttaaaattttctaaagtggtgtattgtatgggtgagatttaatgctaaaaaattgatgtgacttgtcattaaatctcaacCATACAACACACCACTCTAGAaaactttagaaaaaaaaaattctagaagatccttgctc	3'	New	gp4	...((((.(((.((((((((((((((((..((((.(((((((.((((((((.((((((((.(((((((((((((...................).)))))))))))).)))))))).)))))))).))))))).))))..)))))))))))))))).))).))))...	162	31	-72	1.4	21.5	18.5	14.5	11	5.5	10.5	22.1396	15.9288	15.56	14.2674	5.47189	8.27688	middle
236	184	PC-5p-51630_36	TGGTTTACCATCTCAATTGTC	21	Sc0001315	+	88548	88695	cattaatgctacaatgaccccatttatatatcacattTGGTTTACCATCTCAATTGTCgtatttgtatccaatccaaccaatacaaatacgacaattgagatggtaaaccaaatgtggtgtataaatgcggtcattgtagcattactc	5'	New	gp4	...((((((((((((((((.((((((((((((((((((((((((((((((((((((((((((((((((............)))))))))))))))))))))))))))))))))))))))))))))))).))))))))))))))))...	142	34.5	-98.5	1.9	3	3	1.5	2	5	3.5	3.08924	2.58306	1.60965	2.59408	4.97444	2.75896	low
237	184	PC-5p-51630_36	TGGTTTACCATCTCAATTGTC	21	Sc0001315	-	88574	88777	accagttaacccttgtaatttgtggatgagtaatgctacaatgaccgcatttatacaccacattTGGTTTACCATCTCAATTGTCgtatttgtattggttggattggatacaaatacgacaattgagatggtaaaccaaatgtgatatataaatggggtcattgtagcattaatgtttgtggattttttacacttctaacttct	5'	New	gp4	...(((((.....((((((..(..(((...((((((((((((((((.((((((((...((((((((((((((((((((((((((((((((((((((..........))))))))))))))))))))))))))))))))))))))...)))))))).))))))))))))))))..)))..)..))....))))....)))))...	198	33.8	-102.7	1.5	3	3	1.5	2	5	3.5	3.08924	2.58306	1.60965	2.59408	4.97444	2.75896	low
238	185	PC-5p-454692_3	ATTCCTGTCCCCATGTCCCAAATT	24	xpSc0053442	+	42051	42221	cgtacaaggatccctgtcccaaaaATTCCTATCCCCATGTCCCAAATTactcataaccattagatatgttttgaaatcctcaaatcttgagattctcaaatgattctatggttgtgagtaATTTGGGACAGGGGATAAGGatttttagtgacaagagatctttgctcgtta	5'	New	gp4	((..((((((((.(((((..((((((((.(((((((.(((((((((((((((((((((((.(((.....(((((((((.((((...)))))))).)))))....))))))))))))))))))))))))))))))))).))))))))...)))).).))))))))..))...	168	37.4	-81.2	1.3	3	0	0	0	0	0	3.08924	0	0	0	0	0	low
238	186	PC-3p-53944_35	ATTTGGGACAGGGGATAGGG	20	xpSc0053442	+	42051	42221	cgtacaaggatccctgtcccaaaaATTCCTATCCCCATGTCCCAAATTactcataaccattagatatgttttgaaatcctcaaatcttgagattctcaaatgattctatggttgtgagtaATTTGGGACAGGGGATAAGGatttttagtgacaagagatctttgctcgtta	3'	New	gp4	((..((((((((.(((((..((((((((.(((((((.(((((((((((((((((((((((.(((.....(((((((((.((((...)))))))).)))))....))))))))))))))))))))))))))))))))).))))))))...)))).).))))))))..))...	168	37.4	-81.2	1.3	8	0	12	0	5	13	8.23798	0	12.8772	0	4.97444	10.2476	middle
239	187	PC-3p-81539_22	ATGAATGGTGTAGATCAGTAAGGG	24	Sc0005500	+	75101	75269	agcaatgatagagaccccctttgtggaggacccccacaacccctttgtgatccacactattcatgatgtggaccccacacatacacgattgggccccatacatcATGAATGGTGTAGATCAGTAAGGGggttgtgggggtcctccacaaagggggtctcactcattttt	3'	New	gp4	...(((((..((((((((((((((((((((((((((((((((((((((((((.((((((((((((((((((..((((............))))..))..)))))))))))))))).))))).)))))))))))))))))))))))))))))))))))))..)))))...	163	50.9	-122.7	1.4	6	5	0	0	0	1.5	6.17848	4.30509	0	0	0	1.18241	low
240	187	PC-3p-81539_22	ATGAATGGTGTAGATCAGTAAGGG	24	xfSc0025868	+	933	1086	tagagaccccatttgtggaggacctccacaacctcctttgtgatccacaccattcatgatgtggaccccacacatacatgagtggaccccacacatcATGAATGGTGTAGATCAGTAAGGGggttgtgggggtcctccacaaaaggggtctgac	3'	New	gp4	...(((((((.(((((((((((((((((((((((((((..(((((.(((((((((((((((((....((((.((....)).))))......))))))))))))))))).)))))..))))))))))))))))))))))))))).)))))))...	148	51.9	-110.8	1.4	6	5	0	0	0	1.5	6.17848	4.30509	0	0	0	1.18241	low
241	188	PC-5p-96335_18	ATTTTCTAGAGTGGTGCATTGTGT	24	Sc0000038	+	658186	658374	tttttgacgatgagccaggattctctagagtatttttttcctaaaATTTTCTAGAGTGGTGCATTGTGTggttgagatttaatgataagtcacatcaatttttcaacattaaatctcaaccacacaatacaccactttacgaaactttaggaaaaaaccactctagaggatccttggtgtttgacgata	5'	New	gp4	...(((.(((...((((((((((((((((((..((((((((((((.(((..((((((((((.((((((((((((((((((((((......................)))))))))))))))))))))).))))))))))..))).))))))))))))..))))))))))))))).)))..))).)))..	184	34.4	-94.1	1.4	5	2.5	0	0	0	1.5	5.14874	2.15255	0	0	0	1.18241	low
242	188	PC-5p-96335_18	ATTTTCTAGAGTGGTGCATTGTGT	24	Sc0004709	+	109953	110126	nngcaccaaggatcctttagaatttttttttcttaaaATTTTCTAGAGTGGTGCATTGTGTggttgagatttaatgacaagtcacatcaattttttaacattaaatcttaaccatacaatacaccactttaggaaattttaggaaaaaaatactctagaggatccttggtgaag	5'	New	gp4	...((((((((((((((((((...(((((((((((((((((((((((((((((.((((((((((((((((((((((......................)))))))))))))))))))))).)))))))))))))))))))))))))))))...))))))))))))))))))...	168	30.5	-98.1	1.8	5	2.5	0	0	0	1.5	5.14874	2.15255	0	0	0	1.18241	low
243	189	PC-3p-161579_9	AATCCCTTCCTAAATCCTCCAACC	24	Sc0000583	+	62586	62736	gtttggttgagggatttgaggagggatttggaaagggaaatgaaaaaggtaggtgaaatgtgaaaaaaaatatacctacatttcacatagtttcacacacattttctctttccctttccaAATCCCTTCCTAAATCCTCCAACCaaacaca	3'	New	gp4	(((((((((..((((((..(((((((((((((((((((((.(((((..((..(((((((((((((...............))))))))...)))))..)).)))))..)))))))))))))))))))))..))))))..)))))))))...	148	37.1	-75.3	1.3	3	1.5	2	0	0	1.5	3.08924	1.29153	2.1462	0	0	1.18241	low
244	189	PC-3p-161579_9	AATCCCTTCCTAAATCCTCCAACC	24	Sc0001185	+	513690	513821	ttaatgttgtgtttggttgggggatttgggaaggaaaaaggaagagtgtgaaattaggtatacatttcaccttccttttttctttctcttttcaAATCCCTTCCTAAATCCTCCAACCaaacacaccataaa	3'	New	gp4	...(((.(((((((((((((((((((((((((((((((((((((...(((((((((....)).)))))))))))))))))..................))))))))))))))))))))))))))).)))...	126	36.4	-62.9	1.3	3	1.5	2	0	0	1.5	3.08924	1.29153	2.1462	0	0	1.18241	low
245	190	PC-5p-128548_12	AAAATTTATGACCCTTGGATTACC	24	Sc0000687	+	389669	389811	atcatgaaaaaactttcatgaaactgatcatgaAAAATTTATGACCCTTGGATTACCttgattagtgtgtgatgttttaatttaagtgtaatccaagggtcataaatttttcatgatcattttcatgaaagttttttcataat	5'	New	gp4	...((((((((((((((((((((.(((((((((((((((((((((((((((((((((((((((((...........)))).))))).)))))))))))))))))))))))))))))))).))))))))))))))))))))...	137	26.6	-80.3	2.1	3	1.5	1.5	0	0	0	3.08924	1.29153	1.60965	0	0	0	low
246	190	PC-5p-128548_12	AAAATTTATGACCCTTGGATTACC	24	Sc0000862	+	446425	446573	gggatcatgaaaaaactttcatgaaattgatcatgaAAAATTTATGACCCTTGGATTACCttgattagtgtgtgatgttttggtttaagtgtaatccaaaggtcataaatttttcatgatcattttcatgaaagttttttcatgatacg	5'	New	gp4	...(((((((((((((((((((((((.((((((((((((((((((((((.((((((((((((((....................))))).))))))))).)))))))))))))))))))))).)))))))))))))))))))))))...	143	29.5	-79.5	1.8	3	1.5	1.5	0	0	0	3.08924	1.29153	1.60965	0	0	0	low
247	191	PC-5p-23092_82	TCTGGTCACAATGGCTCAAAA	21	Sc0000302	-	319759	319854	tttgagggtcacaattttTGTGGTCACAATGGCTCAAAAttgtcaaaacgacgacagttttgagccattgtgaccacaaaaattatggccctctag	5'	New	gp4	...((((((((.((((((((((((((((((((((((((((((((........)))))))))))))))))))))))))))))))).))))))))...	90	40.6	-67.7	1.7	8.5	7.5	11	5	7.5	1.5	8.75285	6.45764	11.8041	6.4852	7.46166	1.18241	middle
248	191	PC-5p-23092_82	TCTGGTCACAATGGCTCAAAA	21	xfSc0014007	-	287	418	tttgagggtcacaattttTGTGGTCACAATGGCTCAAAActgtcaaaacgacgtcgttttgggtgcaaaacgacgtcgtttttgttttgacagttttgagccattgtggtcacaaaaattgtagccctctaa	5'	New	gp4	...(((((..((((((((((((..(((((((((((((((((((((((((((((((((((((....))))))))))))))......)))))))))))))))))))))))..))))))))))))..)))))...	126	40.9	-91.1	1.7	8.5	7.5	11	5	7.5	1.5	8.75285	6.45764	11.8041	6.4852	7.46166	1.18241	middle
249	192	PC-5p-18569_101	TCCAATGCCGACCACTACTCC	21	Sc0000044	-	759818	759986	accttcattctcttcgtctctttcacttTCCAATGCCGACCACTACTCCattgccctccatagccatcacccaccccttctccaacctccacaaccactgtcaccactatggagggcaagagagtagtggtcggcattggaaactgaaggagacagagagaatgaaaga	5'	New	gp4	...((((((((((..((((((((((.((((((((((((((((((((((..(((((((((((((...........................................)))))))))))))..)))))))))))))))))))))).))))))))))..))))))))))...	163	50.3	-97.612	1.1	10.5	18	5	13	18	24	10.8123	15.4983	5.3655	16.8615	17.908	18.9186	middle
250	192	PC-5p-18569_101	TCCAATGCCGACCACTACTCC	21	Sc0001243	+	524531	524699	accttcattcttttcgtctctttcacttTCCAATGCCGACCACTACTCCaatgccctccatagccatcccccaccacttctccaacctccacaaccactgtcactgctatggagggcaagaaagtagtggtcggcattggaaagtgaaggagacagagagaatgaaaga	5'	New	gp4	...((((((((((..((((((((((((((((((((((((((((((((....(((((((((((((.........................................)))))))))))))....))))))))))))))))))))))))))))))))..))))))))))...	163	49.1	-97.863	1.2	10.5	18	5	13	18	24	10.8123	15.4983	5.3655	16.8615	17.908	18.9186	middle
251	193	PC-3p-76997_23	CAACTACACAGTACATCACTT	21	Sc0000876	-	124585	124734	gagctagagttttttttttttttttaattttttaaagtgatgtattgtatggttgagatttaatgacaagtcacattaattttttaatattaaatctCAACTACACAGTACATCACTTtaaaaaactttaggaaaaaaaaactctagaga	3'	New	gp4	...(((((((((((((((..(......(((((((((((((((((((((.(((((((((((((((((....))..(((((....)))))))))))))))))))).)))))))))))))))))))))....)..)))))))))))))))...	144	22.7	-61.5	1.8	8.5	3.5	4	0	1.5	0	8.75285	3.01356	4.2924	0	1.49233	0	low
252	193	PC-3p-76997_23	CAACTACACAGTACATCACTT	21	Sc0001307	-	324376	324544	gagcaagcatcctctagagtttttttttcctaaagtttcctagagtggtgcattgtgtggttgagatttaatgataagtcatatcaatttttcagcattaaatctCAACTACACAATACATCACTTtaggaaactttaaaaaaaaaaacactctagaggatccttggtg	3'	New	gp4	...((((.((((((((((((((((((((..((((((((((((((((((((.((((((((((((((((((((((..((((.......)))).....)))))))))))))))))))))).))))))))))))))))))))..)))))))).)))))))))))).))))...	163	33.1	-89.3	1.6	8.5	3.5	4	0	1.5	0	8.75285	3.01356	4.2924	0	1.49233	0	low
253	194	PC-3p-137156_11	TCAACCACATACTGTAGCACT	21	Sc0000591	-	141782	141985	atggtgggtgatggcacccaggatcctctggagtgatttttccctaaagtttcctaaagtggtacattgtgtggttgaaatttactgatcaatttttttgatgtgacttgccagtaaatcTCAACCACATAATGTAGCACTttaggaaactttagaaaaattttactctagaggatccttgctcgggtgatggacacaccaata	3'	New	gp4	.(((((.((.....((((((((((((((((((((((..(((..((((((((((((((((((.((((((((((((((((.(((((((((((((.....))))).........)))))))).)))))))))))))))).))))))))))))))))))..)))..))))))))))))))))).....)))))....)).)))))...	200	39.2	-111.3	1.4	0	0	0	2.5	0	3	0	0	0	3.2426	0	2.36482	low
254	194	PC-3p-137156_11	TCAACCACATACTGTAGCACT	21	Sc0001504	+	49443	49656	tggtaggtatccttttgttttgaacctcataaatatcaccaaggatcctctagagtgaaatttccctaaagtttcctagagtgctacattgtgtggttgagatttacttgccagtaaatcTCAACCACATACTGTAGCACTttaggaaactttagaaaaaaatcactctggaggatccttgctccataaatatgcaactcaaactgcctacaca	3'	New	gp4	..(((((((....((((..(((.....((((..(((...(((((((((((((((((((..(((..(((((((((((((((((((((((.(((((((((((((((((((....))))))))))))))))))).)))))))))))))))))))))))..)))..)))))))))))))))))))....)))..)))))))..)))).)))))))...	209	37.9	-113.6	1.4	0	0	0	2.5	0	3	0	0	0	3.2426	0	2.36482	low
255	195	PC-5p-69948_26	ATGGTTGAGATTTACTGACAAT	22	Sc0001169	-	166392	166591	nnngttaatatgagcaaggatcctctagagtgatttttccctaaagtttcctagagtgctacattgtATGGTTGAGATTTACTGACAAGtcacatcaatttttctgatgtgacttgccagtaaatctcaaccacataatatagcactctaggaaactttagagaaatttcactctagaggatccttggtgtgttaatatg	5'	New	gp4	...((((((((...(((((((((((((((((((..((((.(((((((((((((((((((((.(((((.((((((((((((((((.((((((((((((.......)))))))))))).)))))))))))))))).))))).))))))))))))))))))))).))))..)))))))))))))))))))..))))))))...	194	35.5	-130.7	1.8	1.5	2.5	2	2.5	3	1.5	1.54462	2.15255	2.1462	3.2426	2.98467	1.18241	low
256	195	PC-5p-69948_26	ATGGTTGAGATTTACTGACAAT	22	Sc0002931	-	219656	219830	gcaaggatcttctagagtgattttttcctaaagtttcctagagtgctacattgtATGGTTGAGATTTACTGACAAGtcacatcaatttttctgatgtgacttgtcagtaaatctcaaccacacaatgtagcactctagaaaactttagaaaaatttcactctagaggatccttgg	5'	New	gp4	.(((((((((((((((((((..((((.(((((((((.(((((((((((((((((.(((((((((((((((((((((((((((((.......))))))))))))))))))))))))))))).))))))))))))))))).))))))))).))))..))))))))))))))))))).	173	36	-127.7	2	1.5	2.5	2	2.5	3	1.5	1.54462	2.15255	2.1462	3.2426	2.98467	1.18241	low
257	196	PC-3p-96887_18	AATCTCTCCTCAAATCTCCCAATC	24	Sc0000204	+	562617	562768	tgtttggttgggggatttgaggagggatttggaaaggaaaatgaaaaatgtaggtgaaatgtgaataaaacatgcataaatttcacctagtttcacacaccttttccctttccatttccaAATCTCTCCTCAAATCTCCCAATCaaacacaa	3'	New	gp4	((((((((((((((((((((((((((((((((((((((((..(((((..((..((((((((((((................)))))...)))))))..)).)))))..))))).)))))))))))))))))))))))))))))))))))...	149	36.8	-77.6	1.4	3.5	4.5	3.5	0	0	2	3.60411	3.87458	3.75585	0	0	1.57655	low
258	196	PC-3p-96887_18	AATCTCTCCTCAAATCTCCCAATC	24	Sc0000943	+	73893	74044	tgtttggttgggggatttgaggagggatttggaaaggaaaatgaaaaatgtaggtgaaatgtgaataaaacatgcataaatttcacctagtttcacacaccttttccctttccatttccaAATCTCTCCTCAAATCTCCCAATCaaacacaa	3'	New	gp4	((((((((((((((((((((((((((((((((((((((((..(((((..((..((((((((((((................)))))...)))))))..)).)))))..))))).)))))))))))))))))))))))))))))))))))...	149	36.8	-77.6	1.4	3.5	4.5	3.5	0	0	2	3.60411	3.87458	3.75585	0	0	1.57655	low
259	197	PC-5p-19741_95	CAACCCCCTTTGGATCTCCAC	21	xfSc0000122	+	144389	144573	ccactgattaatgcttgagatccccattttttaaagaccacccaCAACCCCCTTTGGATCTCCACcattgatgtatgtataggacccactcatgtatgtgtggagcccacaccatcaatggtagaaatccaaagggggttgggggggtcttcaaacaatgggggtttcaatcattgttgccagct	5'	New	gp4	...(((..(((((.((((((((((((((.(((.((((((.(((.(((((((((((((((.((.((((((((((..(((...((..((((.((....)).))))..)).))).)))))))))).)).)))))))))))))))))).)))))).))).)))))))))))))).)))))....)))..	180	47	-99.4	1.1	5.5	8.5	1.5	11	21	19	5.66361	7.31866	1.60965	14.2674	20.8927	14.9772	middle
260	197	PC-5p-19741_95	CAACCCCCTTTGGATCTCCAC	21	xfSc0005107	+	7230	7371	aaaaatgcttgagactcatattttttggagacccccaCAACCCCCTTTGGATCTCCACcattgatgtacacacatacatcaatagtggagatccaaagggagttgtgggggtctccaaaaaatggaggtctcaattattgtt	5'	New	gp4	...(((..((((((((..(((((((((((((((((((((((.((((((((((((((((.(((((((((......))))))))).)))))))))))))))).)))))))))))))))))))))))..))))))))..)))...	136	42.3	-98	1.6	5.5	8.5	1.5	11	21	19	5.66361	7.31866	1.60965	14.2674	20.8927	14.9772	middle
261	198	PC-3p-112934_14	AATCCTTCCCCAAATCTCCCAACC	24	Sc0001084	+	575438	575588	gtttggttgagggatttgaggaaggatttggaaagggaaatggaaaaggtaggtgaaatgtgaaaaaaaatatacctatatgtcacgtagtttcacacattttttctctttctcttttcaAATCCTTCCCCAAATCTCCCAACCaaacaca	3'	New	gp4	(((((((((.((((((((.(((((((((((((((((((((..(((((..(..(((((((((((...................))))...)))))))..)..)))))..))))))))))))))))))))).)))))))).)))))))))...	148	36.4	-71.8	1.3	0	5	1.5	2	0	1.5	0	4.30509	1.60965	2.59408	0	1.18241	low
262	198	PC-3p-112934_14	AATCCTTCCCCAAATCTCCCAACC	24	Sc0002115	+	292567	292717	gtttggttgagggatttgaggagggatttggaaaggaaaagaaaaaatgtgtgtgaaactatacgaaatatatacatatttgattcacatttcacctactttttttcattttcctttctaAATCCTTCCCCAAATCTCCCAACCaaacaca	3'	New	gp4	(((((((((.((((((((.((((((((((((((((((((((((((((.((..((((((.......((((((....))))))........))))))..)).))))))).))))))))))))))))))))).)))))))).)))))))))...	148	33.8	-69.9	1.4	0	5	1.5	2	0	1.5	0	4.30509	1.60965	2.59408	0	1.18241	low
263	199	PC-3p-93299_18	AAATTTGAGCCATTTGAGCCACAG	24	Sc0000394	+	628253	628412	aacaatgatagagtgccctaatttttgtggctcaaatggctcgaatttgtcaaaacgacgtcgttttgagtacaaaacaacatcaaaattgccaaaacgacgtcgttttgacAAATTTGAGCCATTTGAGCCACAGaaattagggccctcaaacattttc	3'	New	gp4	...((((...(((.((((((((((((((((((((((((((((((((((((((((((((((((((((((.(((.................))))))))))))))))))))))))))))))))))))))))))))))))))))))))).)))...))))...	154	38.8	-100.9	1.6	5	4	0	0	0	0	5.14874	3.44407	0	0	0	0	low
264	199	PC-3p-93299_18	AAATTTGAGCCATTTGAGCCACAG	24	Sc0000408	+	223979	224131	atagagggccctaatttctgtggctcaaatggctcgaatttgccaaaacgacgtcgttttgagtacaaaacaacatcaaaattgccaaaacgacatcgttttggcAAATTTGAGCCATTTGAGCCACAGaaattagggccctcaaacattttc	3'	New	gp4	...((((((((((((((((((((((((((((((((((((((((((((((((.(((((((((.(((.................)))))))))))).))))))))))))))))))))))))))))))))))))))))))))))))..........	140	41.2	-106.5	1.7	5	4	0	0	0	0	5.14874	3.44407	0	0	0	0	low
265	200	PC-5p-82233_21	ACCCCCAGTGAGGTGTCGCGCCCC	24	Sc0002168	+	215348	215491	cccccagtgggggtcgcACCCCCAGTGAGGTGTCGCGCCCCcactggttgaaacttaaaaaaaaagaaaaagaaaaagaaaacagtttttttttttggccaataatggagtgccacctcactgggggtcgacccccagtggcca	5'	New	gp4	...(((.(((((((((.(((((((((((((((.(((.((.....((((..((.(((.......))).....((((((((......))))))))))..)))).....)).))).)))))))))))))))))))))))).)))...	138	51.4	-74.7	1	4	1.5	0	2.5	0	2.5	4.11899	1.29153	0	3.2426	0	1.97069	low
266	200	PC-5p-82233_21	ACCCCCAGTGAGGTGTCGCGCCCC	24	xfSc0000168	+	253316	253496	ttggaaaatagcagtgctgcatacccccagtgggggtcgcACCCCCAGTGAGGTGTCGCGCCCCcactggttgaaacttaaaaaaaaaagaaaaaaaagaaaacagttttttttttgccaataatggagtgccacctcactgggggtcgacccccagtgggtgtatgaggcatttttcttt	5'	New	gp4	..((((((.....((((..(((((.((((.(((((((((.(((((((((((((((..((((..(((...((((...(((........)))..((((((((((....))))))))))..))))..))).)))))))))))))))))))))))))))).)))).)))))..))))))))))..	177	47.5	-91.3	1.1	4	1.5	0	2.5	0	2.5	4.11899	1.29153	0	3.2426	0	1.97069	low
267	201	PC-5p-308696_4	ACAAGTGGTATCAGAGCTCGGATG	24	Sc0000746	-	150490	150704	cttgagtgtgggtgtgtttttctgctcggtacaatttctgaaaggtcttgggtaggatccccgattcccaACAAGTGGTATCAGAGCTCGAATGaaggaaaaataatgtgtttttctttcACCCGAGCTCTGATATCACTTGTTggggatcgatgatctcgcctaagaccttttggaaattataccaagcagaaaaacacacccacactcaaaga	5'	New	gp4	.(((((((((((((((((((((((((.((((.((((((..((((((((((((..(((((..(((((((((((((((((((((((((((((..((((((((((((.....))))))))))))..)))))))))))))))))))))))))))))..)))))..))))))))))))..)))))).)))).)))))))))))))))))))))))))...	211	43.3	-158.4	1.7	3	0	0	0	0	4	3.08924	0	0	0	0	3.1531	low
267	202	PC-3p-111184_15	ACCCGAGCTCTGATATCACTTGTT	24	Sc0000746	-	150490	150704	cttgagtgtgggtgtgtttttctgctcggtacaatttctgaaaggtcttgggtaggatccccgattcccaACAAGTGGTATCAGAGCTCGAATGaaggaaaaataatgtgtttttctttcACCCGAGCTCTGATATCACTTGTTggggatcgatgatctcgcctaagaccttttggaaattataccaagcagaaaaacacacccacactcaaaga	3'	New	gp4	.(((((((((((((((((((((((((.((((.((((((..((((((((((((..(((((..(((((((((((((((((((((((((((((..((((((((((((.....))))))))))))..)))))))))))))))))))))))))))))..)))))..))))))))))))..)))))).)))).)))))))))))))))))))))))))...	211	43.3	-158.4	1.7	25	9	0	0	0	0	25.7437	7.74917	0	0	0	0	middle
268	203	PC-3p-127676_12	ATTTGAGCTATTTGAGTCACA	21	Sc0000335	+	73875	74023	aacaatgctaggtagttcaaaattttgtggctcaaatggctcaaatcactcaaaacgatgtcgttttgagtgtaaatagtgtaaaacgacgtcgttttgacagATTTGAGCTATTTGAGTCACAaaattttgagttactaaacattttc	3'	New	gp4	...((((...((((..(((((((((((((((((((((((((((((((..(((((((((((((((((((..(.......)..)))))))))))))))))))..)))))))))))))))))))))))))))))))..))))...))))...	143	33.6	-78.1	1.6	3	0	0	1.5	0	1.5	3.08924	0	0	1.94556	0	1.18241	low
269	203	PC-3p-127676_12	ATTTGAGCTATTTGAGTCACA	21	Sc0000555	+	836230	836361	tgatagtttaaaattttgtggttcaaatggctcaaatctttcaaaacgacgtcgttttacgtcgttttacactcaaaacgacgtcgttttgagtgATTTGAGCTATTTGAGTCACAaaattttgagctacct	3'	New	gp4	...(((((((((((((((((..((((((((((((((((..((((((((((((((((((..((.(.....)))..))))))))))))))))))..))))))))))))))))..)))))))))))))))))...	126	34.8	-73.5	1.6	3	0	0	1.5	0	1.5	3.08924	0	0	1.94556	0	1.18241	low
270	204	PC-3p-86285_20	AAACTCGGTTCGGCTCAGTTCGTT	24	Sc0001013	-	94565	94692	attaacgaattgagccgagctcgagcccagttccttatcgagccgagctcgagctcaataaacgagctcgataagtaaacgagccgagctcgagctcagcaAAGCTCGGTTCGGCTCAGTTCGTTtgc	3'	New	gp4	...(((((((((((((((((.(((((...((((......)))).((((((((((((.......(.(((((.........))))))))))))))))))......))))))))))))))))))))))...	122	53.1	-69	1	7	4	1.5	0	0	8.5	7.20823	3.44407	1.60965	0	0	6.70033	low
271	204	PC-3p-86285_20	AAACTCGGTTCGGCTCAGTTCGTT	24	Sc0002243	-	176470	176597	gttaacgagctgagccgagatcgagcctaatttcttatcgagccgaactcgagcttaataaattagctcgataagtaaatgagctgagttcgaacacagcaAAACTCGGTTCGGCTCAGTTCGTTtgc	3'	New	gp4	(..(((((((((((((((.((((((....((((((((((((((..(................)..)))))))))).))))..((((.((....)).))))....)))))))))))))))))))))..)	128	45.3	-54.9	0.9	7	4	1.5	0	0	8.5	7.20823	3.44407	1.60965	0	0	6.70033	low
272	205	PC-3p-40008_48	AGTCACAAATCTTTCATGACCATT	24	Sc0002875	+	279328	279494	gcaatgctaggtatcataaaaagtatttcatgaaaatgatcatgaaaaatttgtgacctttatattacacttagaataaagcaccacacactaattaaggtaatctaagAGTCACAAATCTTTCATGACCATTttcatgaaaaaaatttcatgatctctatcatttc	3'	New	gp4	..((((.(((..(((((.(((....(((((((((((((.((((((((.(((((((((..(((.(((((.(((((....................)))))))))).)))..))))))))).)))))))).)))))))))))))....))).)))))..))).))))..	163	28.1	-52.8	1.1	7.5	7	4.5	0	2	3	7.7231	6.02713	4.82895	0	1.98978	2.36482	low
273	205	PC-3p-40008_48	AGTCACAAATCTTTCATGACCATT	24	xpSc0053209	+	213943	214111	aaaaatgttagacatcatgaaaattttatcatgaaaatgatcatgaaaaatttgtgaccctcagattaccttgattagtgtgtggtgctttattgtaagtgtaatctaaaAGTCACAAATCTTTCATGACCATTttcatgaaagacttttcatgatacctagcattgct	3'	New	gp4	...((((((((..((((((((((.(((.(((((((((((.((((((((.(((((((((....(((((((((((...(((.......)))......)))).)))))))....))))))))).)))))))).))))))))))).))).))))))))))..))))))))...	163	30.2	-67.2	1.3	7.5	7	4.5	0	2	3	7.7231	6.02713	4.82895	0	1.98978	2.36482	low
274	206	PC-5p-76000_23	AAAATGGGTATGTCTTGGTAC	21	Sc0000459	+	876686	876823	gtggtttgatttgAAAATGGGTATGTCTTGGTACattggttttgctcttatctgctctaaggcggcaattgaatatgggtatactcttaataaggattgcagatgctctaagacatacccattttcaaatttgataaa	5'	New	gp4	...((..((((((((((((((((((((((((..((((......((.((((.......)))))).((((((......(((.....))).......)))))).))))..))))))))))))))))))))))))..))...	132	35.5	-49.9	1	1.5	1.5	0	1.5	2.5	4.5	1.54462	1.29153	0	1.94556	2.48722	3.54723	low
275	206	PC-5p-76000_23	AAAATGGGTATGTCTTGGTAC	21	Sc0002903	+	56526	56683	taagtttgtatgcttgtggtttgatttgAAAATGGGTATGTCTTGGTACattggttttgctctaaggcggcaattgaatatgggtatactcttaataaggatgctctaagacatactcattttcaaatttgatcaaaaaatggctgaatacagatcaa	5'	New	gp4	...(((((((((((..((((..((((((((((((((((((((((((..((((....(((((.......)))))........(((....)))........))))..))))))))))))))))))))))))..))))......)))...))))))))...	152	33.5	-51.9	1	1.5	1.5	0	1.5	2.5	4.5	1.54462	1.29153	0	1.94556	2.48722	3.54723	low
276	207	PC-5p-57564_32	TTCATGGATTTGGGTAGGGAT	21	Sc0001232	+	514191	514340	cgtgtttggTTCATGGATTTGGGTAGGGATttgaaaagggaaagagaaaaggtgggtgaaatgtgaatgaaatatagctacatttcacgcacctttcacacactttttctctttccctttccaaatccctatccaattcatgaaccaaac	5'	New	gp4	...((((((((((((((.(((((((((((((((.((((((((((((((((((((.((((((.(((..((((((........))))))..))).)))))).)))))))))))))))))))).)))))))))))))))))))))))))))))	147	39.3	-92.1	1.6	1.5	4.5	0	1.5	2	6.5	1.54462	3.87458	0	1.94556	1.98978	5.12378	low
277	207	PC-5p-57564_32	TTCATGGATTTGGGTAGGGAT	21	xfSc0000033	+	283510	283666	tttaggctatgtttggTTCATGGATTTGGGTAGGGATttgaaaagagaaatgaaaaatgtaggtgaaatgtgaatgaaatataactacatttcacacactttttccttttttctttccaaatttttacccaaatgcatgatccaaacacagtcttaa	5'	New	gp4	...(((((.(((((((.(((((.(((((((((..((((((.(((((((((.((((((.((..((((((((((.............))))))))))..))))))))..))))))))).))))))..))))))))).))))).))))))).)))))...	151	31.2	-69.5	1.4	1.5	4.5	0	1.5	2	6.5	1.54462	3.87458	0	1.94556	1.98978	5.12378	low
278	208	PC-5p-109471_15	AGTGTATGGTTGAGATTTACTGAC	24	Sc0000524	+	262748	262926	gagcaaggatcctctagagtgatttttctctaaagtttcctaaagtgctacAGTGTATGGTTGAGATTTACTGACaagtcacatcaatttttctgatgtgacttgccagtaaatctcaaccacacaatataacactttaggaaactttaaaaaaatttcactctagagaatccttggtg	5'	New	gp4	...(((((((.(((((((((((..(((...(((((((((((((((((.((...(((.((((((((((((((((.((((((((((((.......)))))))))))).)))))))))))))))).)))...)).)))))))))))))))))...)))..))))))))))).)))))))...	173	35.2	-102.2	1.6	4	3.5	1.5	0	0	0	4.11899	3.01356	1.60965	0	0	0	low
279	208	PC-5p-109471_15	AGTGTATGGTTGAGATTTACTGAC	24	Sc0003591	-	76346	76526	aagagcaaggatcctctagagtgattttttcctaaagtttcctaaagtgctacAGTGTATGGTTGAGATTTACTGACaagtcacatcaatttttctgatgtgacttgccaataaatctcaaccatacactgtagcactttaagaaactttagagaaatttcactctagaggatccttggtg	5'	New	gp4	.....(((((((((((((((((((..(((..((((((((((.((((((((((((((((((((((((((((((.((.((((((((((((.......)))))))))))).)).)))))))))))))))))))))))))))))).))))))))))..)))..)))))))))))))))))))...	173	36.5	-124.6	1.9	4	3.5	1.5	0	0	0	4.11899	3.01356	1.60965	0	0	0	low
280	209	PC-3p-114449_14	AATCCCTCTTCAAATCTCTCAACC	24	Sc0005325	+	37413	37564	tgtttggttgggggatttgaagagggatttggaaaaggaaagggaaaaggtgtgtaaaactaggtgaaatgtaggtatattttattcacatttcacctaacttttccatttccctttccaAATCCCTCTTCAAATCTCTCAACCaaacatag	3'	New	gp4	(((((((((((((((((((((((((((((((((((.(((((.(((((((..((.....)).(((((((((((..(((.....)))..)))))))))))..))))))).))))).)))))))))))))))))))))))))))))))))))...	149	36.8	-92.5	1.7	3	0	2	0	0	2	3.08924	0	2.1462	0	0	1.57655	low
281	209	PC-3p-114449_14	AATCCCTCTTCAAATCTCTCAACC	24	xpSc0053259	+	221501	221651	tgtttggttagaggatttggagagggatttggaaagggaaaaggaaaaggtaggtgaaatgtgaataaaacatgcctaaatttcacatagtttcacacaccttttccctttccctttccaAATCCCTCTTCAAATCTCTCAACCaaacaca	3'	New	gp4	(((((((((.(((((((((((((((((((((((((((((((.(((((((((..((((((((((((................)))))))...)))))..))))))))).)))))))))))))))))))))))))))).))))))))))))..	149	38.4	-90.3	1.6	3	0	2	0	0	2	3.08924	0	2.1462	0	0	1.57655	low
282	210	PC-3p-120587_13	AAATCTCTCCTCAAATCCCTCACC	24	Sc0000965	-	62591	62740	gtttggttgggggttttggggaaggatttggaaagggaaagggaaaaggtgtgtgaaactatgtgaaatgtaagtatatttttttcacatttcacctaccttttccctttccctttccAAATCTCTCCTCAAATCCCTCAACcaaacaca	3'	New	gp4	(((((((((((((.((((((((..((((((((((((((((((((((((((..(((((...((((((((..............)))))))))))))..))))))))))))))))))))))))))..)))))))).)))))))))))))...	147	40	-96.5	1.6	4.5	4	0	0	3.5	1.5	4.63386	3.44407	0	0	3.48211	1.18241	low
283	210	PC-3p-120587_13	AAATCTCTCCTCAAATCCCTCACC	24	Sc0001740	-	176568	176721	gtgtttggttgggggatttgggaagggatttggaaagagaaagggaaaaggtgtgtgaaattatatgaaatgtaggtatattttttttacatttcacctacctttttcattttcctttccAAATCTCTCCTCAAATCCCTCAACcaaacacagc	3'	New	gp4	((((((((((((((((((((((.((((((((((((((.((((((((((((((..(((((((((...(((((((....)))))))...)).)))))))..))))))))).))))))))))))))))))).))))))))))))))))))))))...	151	37	-85.1	1.5	4.5	4	0	0	3.5	1.5	4.63386	3.44407	0	0	3.48211	1.18241	low
284	211	PC-3p-70583_26	CAAATCTTTCATGACCATTTTT	22	Sc0001333	+	112149	112309	atattggggatcatgaaaattttttcatgaaaatcatcatgaaaaatttgtgatccttagattaccttgattagtgtgtggtgctttattgtaagtgtaatccaaaggtcaCAAATCTTTCATGACCATTTTTatgaaagatttttcatgatacctagcat	3'	New	gp4	...(((((.((((((((((.((((((((((((((..((((((((.((((((((.((((.((((((((((...(((.......)))......)))).))))))..)))))))))))).))))))))..)))))))))))))).)))))))))).)))))...	155	29.8	-62.6	1.3	21.5	2.5	3.5	0	0	1.5	22.1396	2.15255	3.75585	0	0	1.18241	middle
285	211	PC-3p-70583_26	CAAATCTTTCATGACCATTTTT	22	xfSc0011133	+	1078	1226	gagattatgaaaattttgtcatgaaagtgatcataaaaaatttatgacccttagattaccttaagtagtgtatggtgttttattataagtgtaatccaaaggtcaCAAATCTTTCATGACCATTTTTatgaaagacttttcatgatacc	3'	New	gp4	...((((((((((.(((.(((((((((((.((((.(((.((((.(((((.((.(((((((((((((((...........))))).)))).)))))).)).))))).)))).))).)))).))))))))))).))).))))))))))...	143	28.2	-44.6	1.1	21.5	2.5	3.5	0	0	1.5	22.1396	2.15255	3.75585	0	0	1.18241	middle
286	212	PC-5p-32944_58	TTGAGGATGGATTTGGAAAAG	21	xfSc0003471	+	837	1003	tttatgttgtgtttggttagaggaatTTGAGGATGGATTTGGAAAAGaaaaagaaaaaggtgtgtgaaactatgtgaattgtagatatattttttttcacatttcacctaccttttccatttccctttccaaatccttcctcaaatccctcaatcaaacacaacatt	5'	New	gp4	...(((((((((((((((.((((.(((((((((.(((((((((((.((((..(((((.(((..(((((...(((((((..(((....))).....))))))))))))..))))))))..))))..))))))))))).))))))))).))))))))))))))))))).	163	32.3	-75.8	1.4	4	0	0	5	6.5	13.5	4.11899	0	0	6.4852	6.46677	10.6417	middle
287	212	PC-5p-32944_58	TTGAGGATGGATTTGGAAAAG	21	xpSc0053320	+	262115	262263	cttatgcggtgtttggttgggggatTTGAGGATGGATTTGGAAAAGaaaatggaaaaaataggcgaaacacatctcacttactttcacacatctttttctttttttttttcaaatccttccccaaattcccaaccaaacacagcgttgt	5'	New	gp4	...((((.((((((((((.(((((((((.(((.(((((((((((((((((.(((((((.((((.((........)).))))............)))))))))))))))))))))))).))).))))))))))))))))))).))))...	143	37.6	-59.8	1.1	4	0	0	5	6.5	13.5	4.11899	0	0	6.4852	6.46677	10.6417	middle
288	213	PC-5p-325500_3	ACAACCCTCTTTGGATTTCAACCA	24	Sc0004313	+	49905	49992	tgcccACAACCCTCTTTGGATCTCAACCAttgatgtatgtgtggggtccacaccatcAATGGTTGAGATCCAAAAGGAGTTgtgggag	5'	New	gp4	..(((((((((((.(((((((((((((((((((((...((((((...)))))))))))))))))))))))))))))).))))))))..	84	48.9	-60.3	1.4	0	3	0	0	0	0	0	2.58306	0	0	0	0	low
288	214	PC-3p-125884_13	AATGGTTGAGATCCAGAAGGAGTT	24	Sc0004313	+	49905	49992	tgcccACAACCCTCTTTGGATCTCAACCAttgatgtatgtgtggggtccacaccatcAATGGTTGAGATCCAAAAGGAGTTgtgggag	3'	New	gp4	..(((((((((((.(((((((((((((((((((((...((((((...)))))))))))))))))))))))))))))).))))))))..	84	48.9	-60.3	1.4	7	4.5	0	0	0	2	7.20823	3.87458	0	0	0	1.57655	low
289	215	PC-5p-28903_66	CGAACTATGAATTCCTCCTGAT	22	Sc0001429	+	493474	493641	caatctgttggagaagagattggtactgagcgattctgtctccagcaCGAACTATGAATTCCTCCTGATtatgattaaaaaggagtacttgaccctgactacagaagggaagttaaagtactcctttttaatcataaTCAGGAGGAATTCATAGTTCGTgctggaaat	5'	New	gp4	((((((.((....)).))))))..................((((((((((((((((((((((((((((((((((((((((((((((((((..((((.........))))......))))))))))))))))))))))))))))))))))))))))))))))))))...	125	39.3	-98.5	1.5	55	71	17	24	33	20	56.6361	61.1323	18.2427	31.1289	32.8313	15.7655	middle
289	216	PC-3p-95763_18	TCAGGAGGAATTCATAGTTCGT	22	Sc0001429	+	493474	493641	caatctgttggagaagagattggtactgagcgattctgtctccagcaCGAACTATGAATTCCTCCTGATtatgattaaaaaggagtacttgaccctgactacagaagggaagttaaagtactcctttttaatcataaTCAGGAGGAATTCATAGTTCGTgctggaaat	3'	New	gp4	((((((.((....)).))))))..................((((((((((((((((((((((((((((((((((((((((((((((((((..((((.........))))......))))))))))))))))))))))))))))))))))))))))))))))))))...	125	39.3	-98.5	1.5	3	12	0	3	4	3	3.08924	10.3322	0	3.89112	3.97955	2.36482	middle
290	217	PC-3p-118138_14	AATCTCTTCTCAAATCTCCTAACC	24	Sc0000446	+	597702	597853	tgtttggttgggggatttggagaaggatttggaaagaaaaatggaaaaagaacgtgaaatgtgaataaaatatacttacatttcacctaatttcacacaccttttccaattcttttttcaAATCTCTTCTCAAATCTCCTAACCaaacatag	3'	New	gp4	(((((((((((((((((((.(((((((((((((((((.((.(((((((.....((((((((((((................)))))...))))))).....))))))).)).)))))))))))).))))))))))))))))))))))))...	149	32.2	-64	1.3	4.5	4	0	0	0	0	4.63386	3.44407	0	0	0	0	low
291	217	PC-3p-118138_14	AATCTCTTCTCAAATCTCCTAACC	24	xpSc0053270	+	238356	238505	tatttggttgagggatttgggaaaagatttggaaagggagagggaaaaggggcgtaaaattaggtgaaatttagatatattttatttacgttttacctaccttttcttttttcctttttaAATCTCTTCTCAAATCTCCTAACCaaacac	3'	New	gp4	..(((((((..((((((((((((.((((((..(((((((((..(((((((..........(((((((((..((((((.....))))))..))))))))))))))))..)))))))))..)))))).))))))))))))..)))))))...	145	32.7	-67.4	1.4	4.5	4	0	0	0	0	4.63386	3.44407	0	0	0	0	low
292	218	PC-3p-110344_15	AATCTCTTCTCAAATCCTCCAACC	24	Sc0000386	+	581415	581520	tgtgtttggttgggggatttggggagggatttggaaaggaaaaggaaaaggaaaagtgtgtgtgaaactaggtgaAATCTCTTCTCAAATCCTCCAACCaaacata	3'	New	gp4	((((((((((((((((((((((((((((((((..........................................))))))))))))))))))))))))))))))))	106	41.5	-46.237	1.1	5.5	0	2	0	0	0	5.66361	0	2.1462	0	0	0	low
293	218	PC-3p-110344_15	AATCTCTTCTCAAATCCTCCAACC	24	xfSc0038250	+	417	568	tgtttggttaggggatttggaaagagttttggaaagagcaaggaaaaatataagtaaaatgtaaataaaatatacttatatttcacatagtttcacacacattttttgttttcttttccaAATCTCTTCTCAAATCCTCCAACCaaacacag	3'	New	gp4	(((((((((.(((((((((..(((((.((((((((((((((..(((((((((((((................)))))))))))..................))..))))))...)))))))).)))))..))))))))).)))))))))...	149	29.6	-52.3	1.2	5.5	0	2	0	0	0	5.66361	0	2.1462	0	0	0	low
294	219	PC-3p-71887_25	AATTCCTCTCCAAATCCTCCAACC	24	Sc0000880	+	432309	432460	tgtttggttgggggatttggaaagggatttggaaaggaaaatgaaaaaggtaggtgaaatgtgaataaaacatgcctatatttcacctacttttacacacctttttcctttccctttccaAATTCCTCTCCAAATCCTCCAACCaaacacag	3'	New	gp4	(((((((((((((((((((((.(((((((((((((((.(((.(((((((((((((((((((((.............))))))))))))..........))))))))).))).))))))))))))))).)))))))))))))))))))))...	149	38.2	-83.8	1.4	10	5	1.5	0	0	4	10.2975	4.30509	1.60965	0	0	3.1531	middle
295	219	PC-3p-71887_25	AATTCCTCTCCAAATCCTCCAACC	24	Sc0002580	+	114710	114861	tgtttggttgggggatttgaagagggatttggaaagagaaagagaaaaggtgtgtgaaactaggtgaaatataggcatgttttattcacatttcaccaaccttttccatttccctttctaAATTCCTCTCCAAATCCTCCAACCaaacacaa	3'	New	gp4	(((((((((((((((((((.((((((((((((((((.((((..((((((((..((((((....(((((((((....))))))))).....))))))..))))))))..)))).)))))))))))))))).)))))))))))))))))))...	149	38.2	-80	1.4	10	5	1.5	0	0	4	10.2975	4.30509	1.60965	0	0	3.1531	middle
296	220	PC-3p-3905_431	TGAGATGGTTGTGTCCGATGC	21	Sc0001333	-	547914	548008	tacacagaattggacacaatcctctcacatgaggcgagtcctactaattgtgtaggttccacctaataTGAGATGGTTGTGTCCGATTCtgtaca	3'	New	gp4	...((((((((((((((((((.(((((.((.(((.(((.(((((.......))))))))..))).)).))))).))))))))))))))))))...	89	43.2	-47.4	1.2	71	89.5	80	15	13	18.5	73.112	77.0611	85.848	19.4556	12.9335	14.5831	middle
297	220	PC-3p-3905_431	TGAGATGGTTGTGTCCGATGC	21	Sc0001333	-	551477	551571	tacacagaattggacacaatcctctcacatgaggtgagtcctactaattgtgtaggttccacctaataTGAGATGGTTGTGTCCGATTCtgtaca	3'	New	gp4	...((((((((((((((((((.(((((.((.(((((...(((((.......)))))...))))).)).))))).))))))))))))))))))...	89	42.1	-50.9	1.3	71	89.5	80	15	13	18.5	73.112	77.0611	85.848	19.4556	12.9335	14.5831	middle
298	221	PC-3p-70241_26	TCAACATAGTATCAGAATCATTGG	24	Sc0000170	-	1110897	1111066	acgaacaaatggaagggcaaacaaattcacatagagagacttgagctcaagacctctcagaaccAATGGCTCTGATACCATGTTGAAAacaaatTCAACATAGTATCAGAATCATTGGtttgaagggttaatgggtttaagtctcatgatatgtttgttcctttgttata	3'	New	gp4	...((((((.(((...(((((((...(((......((((((((((((((.((((..(((((.((((((..((((((((.((((((((......)))))))).))))))))..)))))))))))..))))..)))))))))))))).)))..))))))))))))))))...	164	36.5	-75.3	1.2	7	10	2.5	0	0	3.5	7.20823	8.61018	2.68275	0	0	2.75896	low
299	221	PC-3p-70241_26	TCAACATAGTATCAGAATCATTGG	24	Sc0005053	+	104927	105096	acgaacaaatggaagggcaaacaaattcacatagagagacttgagctcaagacctctcagaaccAATGGCTCTGATACCATGTTGAAAacaaatTCAACATAGTATCAGAATCATTGGtttgaagggttaatgggtttaagtctcatgatatgtttgttcctttgttata	3'	New	gp4	...((((((.(((...(((((((...(((......((((((((((((((.((((..(((((.((((((..((((((((.((((((((......)))))))).))))))))..)))))))))))..))))..)))))))))))))).)))..))))))))))))))))...	164	36.5	-75.3	1.2	7	10	2.5	0	0	3.5	7.20823	8.61018	2.68275	0	0	2.75896	low
300	222	PC-5p-32351_59	TTTGATCGTGTGGTGGAGAAG	21	xpSc0055815	-	8072	8220	cgaccactctctagTTTGATCGTGTGGTAGAGAAGagcttatgatagggaaacaggagatccataccggggatatcctattcctctatctggatctttccctgttcttaagccCCTCTCCACCACGCGATCAAAacatgggagtggatc	5'	New	gp4	.((((((((((...((((((((((((((.((((...(((((.((((((((.....((((((((....(((((........)))))....))))))))))))))))..)))))...)))).))))))))))))))....)))))))).))	148	48.3	-75.4	1	20	40	13	12	25	14	20.5949	34.4407	13.9503	15.5645	24.8722	11.0358	middle
300	223	PC-3p-160198_9	CCTCTCCACCACACGATCAAA	21	xpSc0055815	-	8072	8220	cgaccactctctagTTTGATCGTGTGGTAGAGAAGagcttatgatagggaaacaggagatccataccggggatatcctattcctctatctggatctttccctgttcttaagccCCTCTCCACCACGCGATCAAAacatgggagtggatc	3'	New	gp4	.((((((((((...((((((((((((((.((((...(((((.((((((((.....((((((((....(((((........)))))....))))))))))))))))..)))))...)))).))))))))))))))....)))))))).))	148	48.3	-75.4	1	6	0	0	0	0	3	6.17848	0	0	0	0	2.36482	low
301	224	PC-5p-216492_6	TATGTGGGGTTTGGCATGATA	21	Sc0001004	-	218004	218200	gagagagatgggagagagggaaagagagacagatatggaggaagttgtgggTATGGGGGGTTTGGCATGATAaagtttttgagttttgatttgataaaactcaaaaaaacaaaaaacaaaTCTTGCCCAGACCTCCCATACCaatgatttccttctatcctccccttccctaccttgtccttacagagatctctaac	5'	New	gp4	...(((((((((((((((((((...(((...((((.(((((((((..(.((((((((((((((((((.(((....(((((((((((((......)))))))))))))............))).)).)))))))))))))))).)..))))))))))))))))...))))))..))).)))).......))))))...	191	41.6	-79.7	1	3	0	0	0	6	0	3.08924	0	0	0	5.96933	0	low
301	225	PC-3p-29_74070	TCTTGCCCAGACCTCCCATACC	22	Sc0001004	-	218004	218200	gagagagatgggagagagggaaagagagacagatatggaggaagttgtgggTATGGGGGGTTTGGCATGATAaagtttttgagttttgatttgataaaactcaaaaaaacaaaaaacaaaTCTTGCCCAGACCTCCCATACCaatgatttccttctatcctccccttccctaccttgtccttacagagatctctaac	3'	New	gp4	...(((((((((((((((((((...(((...((((.(((((((((..(.((((((((((((((((((.(((....(((((((((((((......)))))))))))))............))).)).)))))))))))))))).)..))))))))))))))))...))))))..))).)))).......))))))...	191	41.6	-79.7	1	14651	11326	8172	9981	9148	28295	15086.8	9751.89	8769.37	12945.7	9101.24	22304.2	high
302	226	PC-5p-32526_59	AAAACTGTCATGAAAACCATCTGC	24	Sc0000382	+	862458	862562	aattttcatgAAAACTGTCATGAAAACCATCTGCaccgttagatcaggtatgtgtctcatgattcaacggtgcagatggttttcatgacagttttcatgaaacgt	5'	New	gp4	...(((((((((((((((((((((((((((((((((((((..((((((........)).))))..)))))))))))))))))))))))))))))))))))))...	99	38.1	-68.1	1.7	16.5	9	1.5	0	1.5	5.5	16.9908	7.74917	1.60965	0	1.49233	4.33551	middle
303	226	PC-5p-32526_59	AAAACTGTCATGAAAACCATCTGC	24	Sc0001525	+	161880	161968	tgAAAACTGTCATGAAAACCATCTGCaccgttagatcaggtatgtgtctcatgattcaacagtgcagatggttttcatgacagttttca	5'	New	gp4	.(((((((((((((((((((((((((((.(((..((((((........)).))))..))).))))))))))))))))))))))))))).	87	39.3	-54	1.5	16.5	9	1.5	0	1.5	5.5	16.9908	7.74917	1.60965	0	1.49233	4.33551	middle
304	227	PC-3p-85299_20	AATCCCTCTCCAAATCCTCTAACC	24	Sc0000737	+	600580	600732	gtgtttggttgcaggatttgaggagggatttgaaagggaaatggaaaaggtaggtgaaatgaaaataaaatatgcctaaattttacatagtttcacacaccttttccctttctcttttcaAATCCCTCTCCAAATCCTCTAACCaaacacagc	3'	New	gp4	((((((((((..((((((((..(((((((((((((((((((.(((((((((..(((((((.....((((((........))))))....)))))))..))))))))).)))).)))))))))))))))..))))))))..))))))))))...	150	37.3	-80.4	1.4	3.5	2.5	0	0	2	2	3.60411	2.15255	0	0	1.98978	1.57655	low
305	227	PC-3p-85299_20	AATCCCTCTCCAAATCCTCTAACC	24	Sc0000878	+	663950	664100	cgtttggttggaggatttcagaaggaatttagaaaggaaaatgaaaaaggtaggtgaaatgagaataaaatatacctaaattttacatagtttcacacaccttttctttttccctttccaAATCCCTCTCCAAATCCTCTAACCaaacaca	3'	New	gp4	.(((((((((((((((((.(((.(((.(((.((((((((((.(((((.(((..(((((((.....((((((........))))))....)))))))..)))))))).)))).)))))).)))))).)))..)))))))))))))))))...	147	33.8	-57.9	1.1	3.5	2.5	0	0	2	2	3.60411	2.15255	0	0	1.98978	1.57655	low
306	228	PC-3p-126451_12	AAATTCGAGCCATTTGAGCCACAA	24	Sc0000450	+	37212	37370	gaaaatgtttgagggccttaatttctgtggctcaaatggcttaaatttgtcaaaacgacatcgttttgataattttgatgttgttttgtactcaaaacgacgtcgttttgacAAATTCGAGCCATTTGAGCCACAAaaattaggacctctatcattgtt	3'	New	gp4	...((((...((((..((((((((.((((((((((((((((..((((((((((((((((.(((((((((......................))))))))).))))))))))))))))..)))))))))))))))).)))))))).))))...))))...	153	35.2	-82	1.5	8	4	0	0	0	0	8.23798	3.44407	0	0	0	0	low
307	228	PC-3p-126451_12	AAATTCGAGCCATTTGAGCCACAA	24	Sc0002187	+	175729	175864	gagtcttaatttctgtggcttaaatggttcaaatttgttaaaacgatgtcgttttgacaattttgatattgttttgtactcaaaacgacgtcgttttgacAAATTCGAGCCATTTGAGCCACAAaaattaggacct	3'	New	gp4	..((((((((((.(((((((((((((((((.((((((((((((((((((((((((((((((......))))........)))))))))))))))))))))))))).))))))))))))))))).))))))))))..	132	33.8	-75.5	1.6	8	4	0	0	0	0	8.23798	3.44407	0	0	0	0	low
308	229	PC-3p-132341_12	TTGAGGACCAAAATGACAATT	21	Sc0001208	+	336589	336729	ttgtcattttagtctctcaagttttaatttttgtcattttggtctttaaagttgtcaatttgaatcaatttggtcttaactcaaattgacaactTTGAGGACCAAAATGACAATTtaaaatttgaggaactaaaatgaaaa	3'	New	gp4	...((((((((((..((((((((((((...((((((((((((((((((((((((((((((((((((.....)))......))))))))))))))))))))))))))))))))).))))))))))))..))))))))))...	135	26.2	-71.9	1.9	3	3	0	0	0	0	3.08924	2.58306	0	0	0	0	low
309	229	PC-3p-132341_12	TTGAGGACCAAAATGACAATT	21	Sc0001515	-	206987	207193	ataaaagatagtattgatttctaaaatatgaatttcttgtcattttagtttttcaagtttaaattttgtcattttaatcgtcaaagttgccaaattgagttaggaccaaattgactcaaaTTGAGGACCAAAATGACAATAtttaaaacttaagagactaaatgacaagaaatatatactttaaggaccaaaactgcattttattca	3'	New	gp4	((((((..((((.(((.((..((((.(((..((((((((((((((.(((((((.((((((((((.((((((((((..((.((((..........(((((((((.......))))))))).)))).))..)))))))))).)))).)))))).)))))))))))))))))))))..))).))))..)).))).))))..))))))...	204	25.1	-62.2	1.2	3	3	0	0	0	0	3.08924	2.58306	0	0	0	0	low
310	230	PC-3p-313359_4	ATGTTACAAATCTTTCATGATCAT	24	Sc0001347	+	498796	498964	agaaatgttagagatcacgaaatttttttcatgaaaatgatcatgaaagatttgtgatccttagattacattgattagaatgtggtgttttattctaaatgtaatccaaATGTTACAAATCTTTCATGATCATtttcatgaaagacttttcatgatatctgacattnnn	3'	New	gp4	...(((((((((.((((.((((..((((((((((((((((((((((((((((((((((..((.(((((((((...(((((((........)))))))))))))))).))..))))))))))))))))))))))))))))))))))..)))).)))).)))))))))...	163	26	-78.6	1.8	4	1.5	0	0	0	0	4.11899	1.29153	0	0	0	0	low
311	230	PC-3p-313359_4	ATGTTACAAATCTTTCATGATCAT	24	Sc0002432	+	42013	42161	agaatcatgaaaaaattttcacaaaaatagtcatgaaagatttgtgacttttagattaccttgattagtatgtggtgttttattctaagtgtaatccaaATGTTACAAATCTTTCATGATCATtttcatgaaaaaaatttcatgatacc	3'	New	gp4	...(((((((((...((((((..(((((..((((((((((((((((((.(((.(((((((((((.(((...........))).)).))).)))))).))).))))))))))))))))))..)))))..))))))...)))))))))...	143	25.5	-52.7	1.4	4	1.5	0	0	0	0	4.11899	1.29153	0	0	0	0	low
312	231	PC-3p-108648_15	TTTGGCAATTCATTTGGCGTC	21	Sc0000619	-	157288	157394	aaaaatgctagagatcccaaatgaattaccaaatattctaccaaatacacacacgggtgtggtttggtagaataTTTGGCAATTCATTTGGTGTCtctagcattgct	3'	New	gp4	...(((((((((((..(((((((((((.((((((((((((((((((.(((((....))))))))))))))))))))))).)))))))))))..)))))))))))...	101	36.4	-65.9	1.7	2	0	0	3	2.5	0	2.05949	0	0	3.89112	2.48722	0	low
313	231	PC-3p-108648_15	TTTGGCAATTCATTTGGCGTC	21	Sc0002077	+	120191	120342	cctagcaaaaatgctagagatcccaaatgaattaccaaatattctatcaaatactcacatggatgtgggaccaacgccacatgggacccacacccatgtgagtatttggtagaataTTTGGTAATTCATTTGGCGTCtctagcattgctctt	3'	New	gp4	...((((...((((((((((..((((((((((((((((((((((((((((((((((((((((.((((((.(((........)))..)))))).))))))))))))))))))))))))))))))))))))))))..))))))))))))))...	146	40.8	-98.3	1.6	2	0	0	3	2.5	0	2.05949	0	0	3.89112	2.48722	0	low
314	232	PC-5p-16074_116	TTTTCTGGTCACAATGGCTCA	21	Sc0000294	+	175342	175459	cacaatTTTTCTGGTTACAATGGCTCAaaactgttaaaacgacgttgttttggcatgttttacacccaaaacgacgtcgttttgacagttttgaaccattgtgaccataaaaattgcg	5'	New	gp4	..((((((((.((((((((((((.(((((((((((((((((((((((((((((..((.....)).))))))))))))))))))))))))))))).)))))))))))).))))))))..	114	37.3	-70.6	1.6	11.5	16.5	11	3.5	7	8.5	11.8421	14.2068	11.8041	4.53964	6.96422	6.70033	middle
315	232	PC-5p-16074_116	TTTTCTGGTCACAATGGCTCA	21	xfSc0020765	-	1133	1274	agagggtcataatTTTTGTGGTCACAATGGCTCAaaattgtcaaaacgacgtcattttggcatgttttgatatattttgcacccaaaacgatatcgttttgacagttttgagccattgtggtcacaaaaattgtgacccaca	5'	New	gp4	...(((((((((((((((((..(((((((((((((((((((((((((((..((.((((((..(((.............))).)))))).))..)))))))))))))))))))))))))))..)))))))))))))))))...	136	37.3	-85.4	1.6	11.5	16.5	11	3.5	7	8.5	11.8421	14.2068	11.8041	4.53964	6.96422	6.70033	middle
316	233	PC-3p-27821_68	TGACACAAATTGCACTGCCTC	21	Sc0000064	-	962199	962381	caccttgctaggctacttgcggattttgatatatatcttgaggcagtgcaatatgtgtcacaaagttggttaattctatccggcaacaaactcatccttatatggaattaattaactttgTGACACAAATTGCACTGCCTCaggatatgtatcaaaatccgcaagtagcctagcaaggtgttc	3'	New	gp4	((((((((((((((((((((((((((((((((((((((((((((((((((((.((((((((((((((..((((((((((..((............))....))))))))))..)))))))))))))).))))))))))))))))))))))))))))))))))))))))))))))))))))...	180	39.3	-131.1	1.8	3.5	9	4	7.5	10	7.5	3.60411	7.74917	4.2924	9.72779	9.94888	5.91206	low
317	233	PC-3p-27821_68	TGACACAAATTGCACTGCCTC	21	xpSc0053873	-	6315	6497	caccttgctaggctacttgcggattttgatacatatcttgagacagtgcaatatgtgtcacaaagttggttaattctatccggcaacaaacttatccttatatggaattaattaactttgTGACACAAATTACACTGCCTCaggatatgtatcaaaatccgcaagtagcctagcaaggtgttc	3'	New	gp4	((((((((((((((((((((((((((((((((((((((((((.(((((.(((.((((((((((((((..((((((((((..((............))....))))))))))..)))))))))))))).))).))))).))))))))))))))))))))))))))))))))))))))))))...	180	38.3	-119.3	1.7	3.5	9	4	7.5	10	7.5	3.60411	7.74917	4.2924	9.72779	9.94888	5.91206	low
318	234	PC-3p-56893_33	TTTTGAGGGATTTGAGCCATT	21	Sc0001967	+	35280	35415	ctaggtaactcaaaattttgtggctcaaatggctcaaatccctcaaaacgacgtcgttttgagtgtaaatgagtgtaaaacgacgtcgTTTTGAGGGATTTGAGCCATTtgagccacaaaattttgagctaccaaa	3'	New	gp4	...((((.(((((((((((((((((((((((((((((((((((((((((((((((((((((..(........)..))))))))))))))))))))))))))))))))))))))))))))))))))))).))))...	130	39.7	-98.5	1.8	5.5	0	1.5	2.5	3.5	6.5	5.66361	0	1.60965	3.2426	3.48211	5.12378	low
319	234	PC-3p-56893_33	TTTTGAGGGATTTGAGCCATT	21	xpSc0054595	+	786	935	gaaaatgtttggtagctcaaaattttgtggctcaaatggctcaaatccctcaaaacgacgtcgttttacactcatttacactcaaaacgacgtcgTTTTGAGGGATTTGAGCCATTtgagccacaaaattttgagctacctagcattgtt	3'	New	gp4	...((((((.(((((((((((((((((((((((((((((((((((((((((((((((((((((((((................))))))))))))))))))))))))))))))))))))))))))))))))))))))))).))))))...	144	39.3	-108.1	1.8	5.5	0	1.5	2.5	3.5	6.5	5.66361	0	1.60965	3.2426	3.48211	5.12378	low
320	235	PC-3p-88249_20	AGTTTCGAGCCATTCGAGCCACTG	24	Sc0000464	+	510281	510430	aaaaatgtttgagggccacaaaatctgtggctcaaatggctcgaaactgtcaaaacgatgtcgttttgcgttgttttgacagcaaaacgacgccattttgacAGTTTCGAGCCATTCGAGCCACTGaattttgggctccctaccattgct	3'	New	gp4	...((((.....(((((.(((((((.(((((((.(((((((((((((((((((((...((((((((((((((.....))).)))))))))))...))))))))))))))))))))).))))))).)).)))))))))).....))))...	144	44.7	-80.8	1.2	16	2.5	2.5	0	4	5	16.476	2.15255	2.68275	0	3.97955	3.94137	middle
321	235	PC-3p-88249_20	AGTTTCGAGCCATTCGAGCCACTG	24	Sc0003422	+	52861	52983	gcagcaatggttggtggcccgaaattcagtggctcgaaaggctcgaaactgtcaaaacgacgtcgttttggcAGTTTCGAGCCATTCGAGCCACTGattttgtggccctcaaacagtggccct	3'	New	gp4	...((..((.(((..(((((((((.(((((((((((((.((((((((((((((((((((....)))))))))))))))))))).)))))))))))))))))).))))..))).))...))...	117	52.8	-80	1.2	16	2.5	2.5	0	4	5	16.476	2.15255	2.68275	0	3.97955	3.94137	middle
322	236	PC-5p-242304_5	ATATTCCAATGCATAAGACAACCA	24	Sc0005075	+	411	573	aatgcaggacaATATTCCAATGCATAAGACAACCAtttcaatcaaaaccctaaaaagggttgtatctgaaaaggaaccatattcaatcaccatgaaaaggcctctttttagaatctggttGAATTTGGTTGTCTTATGCATTGGaatattgccctgcattaaa	5'	New	gp4	((((((((.((((((((((((((((((((((((((.((((((((.((((((....))))))...((((((((((..((...((((.......))))..))..))))))))))...))))))))..)))))))))))))))))))))))))).))))))))...	160	35	-83.4	1.5	5	0	0	0	0	0	5.14874	0	0	0	0	0	low
322	237	PC-3p-176640_8	GAATTTGGTTGTCTTATGCATTGG	24	Sc0005075	+	411	573	aatgcaggacaATATTCCAATGCATAAGACAACCAtttcaatcaaaaccctaaaaagggttgtatctgaaaaggaaccatattcaatcaccatgaaaaggcctctttttagaatctggttGAATTTGGTTGTCTTATGCATTGGaatattgccctgcattaaa	3'	New	gp4	((((((((.((((((((((((((((((((((((((.((((((((.((((((....))))))...((((((((((..((...((((.......))))..))..))))))))))...))))))))..)))))))))))))))))))))))))).))))))))...	160	35	-83.4	1.5	5.5	0	3	0	1.5	0	5.66361	0	3.2193	0	1.49233	0	low
323	238	PC-3p-100511_17	TGCTCTTCTCAACTGTGCAGT	21	Sc0000527	+	473851	474025	tataattatttgttgttaaatattaacgttctactgcacattttaggagagcatgtcaaaaaagcaaacgtcaaagagtaccaaagttgataacggacattgataattgctttttcgacaTGCTCTTCTCAACTGTGCAGTgaaatgttaatatttagtaacaaataattatttc	3'	New	gp4	.(((((((((((((..((((((((((((((..((((((((.((.(((((((((((((.(((((((((..(((((...((.((............)))).)))))..))))))))).))))))))))))).)).))))))))..))))))))))))))..)))))))))))))...	171	29.7	-78.7	1.5	3	0	0	2.5	2.5	2	3.08924	0	0	3.2426	2.48722	1.57655	low
324	238	PC-3p-100511_17	TGCTCTTCTCAACTGTGCAGT	21	Sc0002020	+	283202	283380	ccatataattatttgttactaaatattaacgtttcactgcacatttaggagagtgtcaaaaatggaaacgtcaaaaagtatcaaagttgatagcgggcatggttaattgcttttttgataTGCTCTTCTCAACTGTGCAGTgaaatgttaatatttcataacaaataattatttggttt	3'	New	gp4	(((.((((((((((((((..(((((((((((((((((((((((.((((((((((((((((((.(....).........(((((....)))))...((((........))))))))))))..)))))))).)).)))))))))))))))))))))))..)))))))))))))).)))...	176	29.6	-72.1	1.4	3	0	0	2.5	2.5	2	3.08924	0	0	3.2426	2.48722	1.57655	low
325	239	PC-5p-16638_113	AAAAGTGGGGTTTGAGGTCTCACT	24	Sc0000152	+	1219883	1219994	taccacataggaAAAAGTGGGGTTTGAGGTCTCATTttttcactttttcgaagaggtgagtctcgaggagatgaAAAGATGGGATCTTAGGCCTCATTtttttcatgtgacc	5'	New	gp4	...(((((.(((((((((((((..((((((((((((((((((..(..((((.((......))))))..)..))))))))))))))))))..))))))))))))))))))...	106	41.1	-55.9	1.2	64	33	9	7	0	8	65.9038	28.4136	9.6579	9.07927	0	6.30619	middle
325	240	PC-3p-485435_3	AAAGATGGGATCTTAGGCCTCATT	24	Sc0000152	+	1219883	1219994	taccacataggaAAAAGTGGGGTTTGAGGTCTCATTttttcactttttcgaagaggtgagtctcgaggagatgaAAAGATGGGATCTTAGGCCTCATTtttttcatgtgacc	3'	New	gp4	...(((((.(((((((((((((..((((((((((((((((((..(..((((.((......))))))..)..))))))))))))))))))..))))))))))))))))))...	106	41.1	-55.9	1.2	0	0	0	0	0	3	0	0	0	0	0	2.36482	low
326	241	PC-5p-8920_203	TATTGGAGACTTGAGATGGTG	21	xpSc0053282	+	354166	354306	ttatattaatatattgtgtcagcagttaTATTGGAGACTTGAGATGGTGtgtgtgaaaaaaaaatctcatgagaatttctttgagatgattgcattaccgtctccagtctccaatctgacttctgtcatgatttaatactc	5'	New	gp4	...((((((...((..((.(((.(((((.((((((((((.(((((((...(((..(.......((((((.(((.....)))))))))..)..)))..))))))).)))))))))).))))).))).))..))))))))...	135	33.3	-53	1.1	25	16	18	19	18	35.5	25.7437	13.7763	19.3158	24.6437	17.908	27.9837	middle
327	241	PC-5p-8920_203	TATTGGAGACTTGAGATGGTG	21	xpSc0053282	+	369550	369690	ttatattaatatattgtgtcagcagttaTATTGGAGACTTGAGATGGTGtgtgtgaaaaaaaaatctcatgagaatttctttgagatgattgcattaccgtctccagtctccaatctgacttctgtcatgatttaatactc	5'	New	gp4	...((((((...((..((.(((.(((((.((((((((((.(((((((...(((..(.......((((((.(((.....)))))))))..)..)))..))))))).)))))))))).))))).))).))..))))))))...	135	33.3	-53	1.1	25	16	18	19	18	35.5	25.7437	13.7763	19.3158	24.6437	17.908	27.9837	middle
328	242	PC-5p-61382_30	TACAGTGTGCGGTTGAGATTT	21	Sc0000033	+	1145438	1145616	gagcaaggatcctctagagtgatttttttctaaagtttcctaaagtgcTACAGTGTGTGGTTGAGATTTactggcaagtcacatcaatttttctgatgtgacttgccagtaaatctcaaccacacaatgtagcactctaggaaactttagagaaatttcactctagaggatccttggtg	5'	New	gp4	...(((((((((((((((((((..((((((((((((((((((.(((((((((.(((((((((((((((((((((((((((((((((.......))))))))))))))))))))))))))))))))).))))))))).))))))))))))))))))..)))))))))))))))))))...	173	39.1	-139.9	2	9.5	4	7.5	2.5	7.5	5	9.7826	3.44407	8.04825	3.2426	7.46166	3.94137	low
329	242	PC-5p-61382_30	TACAGTGTGCGGTTGAGATTT	21	Sc0003821	+	4297	4472	caccaaggatcctctagagtgaaatttctctaaagtttcctaaaatgcTACAGTGTGTGGTTGAGATTTactgacaagtcacatcagaattgatgtgacttgccagtaaatctcaaccatacactgtagcactttaggaaattttaggaaaaaatcactctagaggatccttgctc	5'	New	gp4	...(((((((((((((((((((..(((..(((((((((((((((.((((((((((((((((((((((((((((.(((((((((((......))))))))))).)))))))))))))))))))))))))))).)))))))))))))))..)))..)))))))))))))))))))...	170	38.1	-125.7	1.9	9.5	4	7.5	2.5	7.5	5	9.7826	3.44407	8.04825	3.2426	7.46166	3.94137	low
330	243	PC-5p-155485_10	CTAACACACTCATGTCCACCTT	22	xfSc0000001	+	986616	986780	ctagtttttcaaaagctctgacaCTAACACACTCATGTCCACCTTgactttgaatgaaatcatttaacgttggatgcattgttgttcttccttatctaacgttaaatgatttcattcaaattcaAGGTGGACATGAGTGTGTTAGTGTaagggcttttgaaagac	5'	New	gp4	...((((((((((((((((.(((((((((((((((((((((((((((.((((((((((((((((((((((((((((((....)))........))))))))))))))))))))))))))).))))))))))))))))))))))))))).))))))))))))))))	162	35.8	-109.5	1.9	0	3.5	0	1.5	0	1.5	0	3.01356	0	1.94556	0	1.18241	low
330	244	PC-3p-269872_4	AGGTGGACATGAGTGTGTTAGTGT	24	xfSc0000001	+	986616	986780	ctagtttttcaaaagctctgacaCTAACACACTCATGTCCACCTTgactttgaatgaaatcatttaacgttggatgcattgttgttcttccttatctaacgttaaatgatttcattcaaattcaAGGTGGACATGAGTGTGTTAGTGTaagggcttttgaaagac	3'	New	gp4	...((((((((((((((((.(((((((((((((((((((((((((((.((((((((((((((((((((((((((((((....)))........))))))))))))))))))))))))))).))))))))))))))))))))))))))).))))))))))))))))	162	35.8	-109.5	1.9	4	0	0	0	0	0	4.11899	0	0	0	0	0	low
331	245	PC-3p-93702_18	TCTCTTTGCGCTCCCTAATA	20	Sc0004714	+	30671	30766	gcagcatttatattagggagcgcaaagaaaaagaagtagagagttttggtgaacggctctatttcttTCTCTTTGCGCTCCCTAATAtattgtatt	3'	New	gp4	...(((..((((((((((((((((((((.((((((((((((.((((....))))..)))))))))))).)))))))))))))))))))).)))...	90	37.5	-54.8	1.5	0	0	1.5	2.5	5	4.5	0	0	1.60965	3.2426	4.97444	3.54723	low
332	245	PC-3p-93702_18	TCTCTTTGCGCTCCCTAATA	20	Sc0004714	-	30619	30705	caatatattagggagcgcaaagagaaagaaatagagccgttcaccaaaactctctacttcttTTTCTTTGCGCTCCCTAATAtaaat	3'	New	gp4	...(((((((((((((((((((((((((((.(((((..(((......))).))))).)))))))))))))))))))))))))))...	81	36.8	-49.1	1.5	0	0	1.5	2.5	5	4.5	0	0	1.60965	3.2426	4.97444	3.54723	low
333	246	PC-3p-154187_10	AAATAGTGCCGTCGCAAATGCTCT	24	Sc0000584	+	307725	307892	accatttaccgtctcaaaaaagcagagcatttgcgacggcactatttgccgtctcaaaaaatgagagtatttgcgatggtattttctgccgtcgcaaatactctcattttttgagacggcAAATAGTGCCGTCGCAAATGCTCTgcttttttgagacggcaaatgnnn	3'	New	gp4	..(((((.(((((((((((((((((((((((((((((((((((((((((((((((((((((((((((((((((((((((((.....))))))))))))))))))))))))))))))))))))))))))))))))))))))))))))))))))))))))).)))))...	163	42.3	-140.5	2	3	2	0	0	0	0	3.08924	1.72204	0	0	0	0	low
334	246	PC-3p-154187_10	AAATAGTGCCGTCGCAAATGCTCT	24	xpSc0054252	+	30091	30252	aaatgccgtctcaaaaaagtagagtatttgcgacgacactatttgccgtctcaaaaaattagagtatttgcaacggtatttctctgccgtcgcaaatactctcatttttttagacggcAAATAGTGCCGTCGCAAATGCTCTgcttttttgagacggcaaat	3'	New	gp4	...((((((((((((((((((((((((((((((((.(((((((((((((((.(((((((.(((((((((((.((((((......)))))).))))))))))).))))))).))))))))))))))).))))))))))))))))))))))))))))))))...	156	40.1	-114.7	1.8	3	2	0	0	0	0	3.08924	1.72204	0	0	0	0	low
335	247	PC-5p-91598_19	TTGTGATCCACACCATTCATG	21	Sc0000555	+	642590	642744	tagggaccccctttgtggaggacccccacaaccccctTTGTGATCCACACCATTCATGatgtggaccccacacatacatgagtggaccccacacatcATGAATGGTGTAGATTAGTGAGGGggttgtgggggtcctccacaaaagggggtctaac	5'	New	gp4	...(((((((((((((((((((((((((((((((((((..(((((.(((((((((((((((((....((((.((....)).))))......))))))))))))))))).)))))..))))))))))))))))))))))))))).))))))))...	149	54.2	-117.6	1.4	4	0	0	2	2	1.5	4.11899	0	0	2.59408	1.98978	1.18241	low
335	248	PC-3p-244597_5	ATGAATGGTGTAGATTAGTGAGGG	24	Sc0000555	+	642590	642744	tagggaccccctttgtggaggacccccacaaccccctTTGTGATCCACACCATTCATGatgtggaccccacacatacatgagtggaccccacacatcATGAATGGTGTAGATTAGTGAGGGggttgtgggggtcctccacaaaagggggtctaac	3'	New	gp4	...(((((((((((((((((((((((((((((((((((..(((((.(((((((((((((((((....((((.((....)).))))......))))))))))))))))).)))))..))))))))))))))))))))))))))).))))))))...	149	54.2	-117.6	1.4	5	0	0	0	0	0	5.14874	0	0	0	0	0	low
336	249	PC-3p-123632_13	ATTTCCCTTTCCAAATTCCTTCCC	24	Sc0001869	+	347962	348128	ctaatgctgtatttggttgggagattttgggagggatttggaaagagaaatggaaaaggtaggtggaatgtgaataaaatatgtctatatttcacctagtttcacacaccttttctATTTCCCTTTCCAAATTCCTTCCCaaataccctaaccaaacagagcataaa	3'	New	gp4	...(((((...((((((((((..((((.(((((((((((((((((.(((((((((((((((((((((((((..(((.....)))..)))))))))))..........)))))))))))))).))))))))))))))))).))))..))))))))))...)))))...	161	36.5	-80.5	1.3	9	2	0	0	1.5	0	9.26772	1.72204	0	0	1.49233	0	low
337	249	PC-3p-123632_13	ATTTCCCTTTCCAAATTCCTTCCC	24	xpSc0053248	+	167191	167367	aatcctaatgctgtgtttggttgggggatttggggagggatttggaaagggaaagggaaaatgtgtgtgaaactatgtgaaatataggcatgatttattcacatttcacctactttttctATTTCCCTTTCCAAATTCCTTCCCaaatctcccaaccaaacacagcataagtgaata	3'	New	gp4	..((((.(((((((((((((((((((((((((((((((((((((((((((((((..(((((.((..(((((...(((((((................))))))))))))..)).)))))..))))))))))))))))))))))))))))))))))))))))))))))).)).))...	172	38.4	-105.2	1.5	9	2	0	0	1.5	0	9.26772	1.72204	0	0	1.49233	0	low
338	250	PC-3p-62523_29	AATCCCTCCTCAAATCCTCCGACC	24	Sc0000515	-	115002	115153	tgtttggttgagaaatttggagagggatttggaaagggaaaaggaaaaggtgcgtaaaactaggtgacatatagacatgttttattcacatttcacctgtcttttccatttctctttccaAATCCCTCCGCAAATCCTCCGACCaaacacag	3'	New	gp4	((((((((((.((.(((((..((((((((((((((((((((.((((((((..........(((((((.(((((((.....)))))....)).))))))))))))))).))))))))))))))))))))..)))))..))))))))))))...	149	40.1	-66.9	1.1	3	1.5	2.5	2.5	1.5	3.5	3.08924	1.29153	2.68275	3.2426	1.49233	2.75896	low
339	250	PC-3p-62523_29	AATCCCTCCTCAAATCCTCCGACC	24	xpSc0053967	-	101341	101492	tgtttggttggaggatttgatgagggatttggaaagggaaatggaaaagttaggtgaaatgtgaataaaatatacttacatttcacctagtttcacacaccttttccctttccctttccaAATCCCTCCTCAAATCCCCCGACCaaacacaa	3'	New	gp4	(((((((((((.((((((((.((((((((((((((((((((.((((((((((((((((((((((.((.....)).)))))))))))))))..........))))))).)))))))))))))))))))).)))))))).)))))))))))...	149	39.5	-92.1	1.5	3	1.5	2.5	2.5	1.5	3.5	3.08924	1.29153	2.68275	3.2426	1.49233	2.75896	low
340	251	PC-5p-116407_14	ATTGTGTGGTTGAGATTTATTAGC	24	Sc0003160	-	87160	87338	gagcaaggatcctctaaagtgattttttcctaaagtttcctagagtgctacATTGTGTGGTTGAGATTTATTAGCaagtcacatcagaaaaattgatgtgacttgccagtaaatctcaaccacacaatgtaacactttaggaaactttaagaaaatttcactctagaggatccttggtg	5'	New	gp4	...(((((((((((((.(((((..(((((.(((((((((((((((((.((((((((((((((((((((((((.((((((((((((((.....)))))))))))))).)))))))))))))))))))))))).))))))))))))))))).)))))..))))).)))))))))))))...	173	36.3	-121.6	1.9	8	2	0	0	0	0	8.23798	1.72204	0	0	0	0	low
341	251	PC-5p-116407_14	ATTGTGTGGTTGAGATTTATTAGC	24	xfSc0012349	-	144	322	gagcaaggatcctctagagtgattttttcctaaagtttcttagagtgctccATTGTGTGGTTGAGATTTATTAGCaagtcacatcaatttttctgatgtgacttgccagtgaatctcaaccacacaatggagcactctaggaaactttaggaaaatttcactctaaaagatctttggtg	5'	New	gp4	...((((((((...((((((((..((((((((((((((((((((((((((((((((((((((((((((((((.(((((((((((((.......))))))))))))).))))))))))))))))))))))))))))))))))))))))))))))))..))))))))...))))))))...	173	38	-127.6	1.9	8	2	0	0	0	0	8.23798	1.72204	0	0	0	0	low
342	252	PC-3p-40622_47	ATTTCTCTTTCCAAATCCCTTCCC	24	Sc0001356	+	510279	510455	gttctttatgctttgtttggtttggggatttggagagggatttggaaaggaaaagggaaaaggtgtgtaaaactatgtgaaatataggcatgatttattcacatttcacctacattttccATTTCTCTTTCCAAATCCCTTCCCaaatcccccaaccaaacacagcattagagatta	3'	New	gp4	..((((((((((.(((((((((.((((((((((..((((((((((((((((((.(((((((((((.........(((((((................)))))))..)))))...)))))).)))).))))))))))))))..)))))))))).))))))))).))))).)))))...	172	37.3	-87.2	1.3	9.5	6	2.5	0	1.5	4	9.7826	5.16611	2.68275	0	1.49233	3.1531	low
343	252	PC-3p-40622_47	ATTTCTCTTTCCAAATCCCTTCCC	24	Sc0003533	+	12259	12422	taagcttgtgtttggttgagggatttggagagggatttggaaagagaaagggaaaaggtgtgtgaaactatgtgaaatataggcatgatttatgcacatttcacctaccttttccATTTCTCTTTCCAAATCCCTTCCCaaatcccccaaccaaacacagcata	3'	New	gp4	...((.((((((((((((.(((((((((..(((((((((((((((((((.(((((((((..((((((((((((...))))))(((((...)))))...))))))..))))))))).)))))))))))))))))))..))))))))).))))))))))))))...	158	40.2	-97.7	1.5	9.5	6	2.5	0	1.5	4	9.7826	5.16611	2.68275	0	1.49233	3.1531	low
344	253	PC-5p-369706_3	AAAAGTGTGGTTCAAATGGCTCAA	24	Sc0001480	+	384540	384711	tcagcagcacgaaaaatgtttgagggtcacaAAAAGTGTGGTTCAAATGGCTCAAaactatcaaaacgacgtcgttttgcgtcgttttacgcccaaaacgacgtcgttttgacaATTTTGAGCCATTTGAACCACACTttttgtggccttctaccattgctccagcagcacc	5'	New	gp4	...((.((..((..((((...((((((((((((((((((((((((((((((((((((...(((((((((((((((((((.(.((.....))).)))))))))))))))))))...))))))))))))))))))))))))))))))))))))...))))..))..)).))...	166	44.2	-101.1	1.3	3	0	0	0	0	0	3.08924	0	0	0	0	0	low
344	254	PC-3p-67143_27	ATTTTGAGCCATTTGAACCACACT	24	Sc0001480	+	384540	384711	tcagcagcacgaaaaatgtttgagggtcacaAAAAGTGTGGTTCAAATGGCTCAAaactatcaaaacgacgtcgttttgcgtcgttttacgcccaaaacgacgtcgttttgacaATTTTGAGCCATTTGAACCACACTttttgtggccttctaccattgctccagcagcacc	3'	New	gp4	...((.((..((..((((...((((((((((((((((((((((((((((((((((((...(((((((((((((((((((.(.((.....))).)))))))))))))))))))...))))))))))))))))))))))))))))))))))))...))))..))..)).))...	166	44.2	-101.1	1.3	32	18	7	5	3	0	32.9519	15.4983	7.5117	6.4852	2.98467	0	middle
345	255	PC-3p-71575_25	TTTCAAATCACTCCCCAATTC	21	Sc0001646	-	20705	20865	tgctgtgtttggttgggggatttgaagagggatttggaaagaaaaatggaaaaggtaggtgaaatatgaataaaacatacctctatttcacctagtttcacacaccttttccctttccctTTTCAAATCACTCCCCAAATCccctaaccaaacacagcgta	3'	New	gp4	.(((((((((((((((((((((((..(((.(((((((((((..(((.(((((((((((((((((((.((............))))))))))))..........))))))))).)))..))))))))))).)))..)))))))))))))))))))))))...	157	39.8	-83.9	1.3	2	3.5	2	0	3.5	3.5	2.05949	3.01356	2.1462	0	3.48211	2.75896	low
346	255	PC-3p-71575_25	TTTCAAATCACTCCCCAATTC	21	xpSc0053593	-	149994	150092	ggcggttttgaggagtgatttgaaaagaaagggaaaaattaggtgaaagtatcaaacacattttttctttccctTTTCAAATCACTCCCCAATTCtctc	3'	New	gp4	...((..(((.((((((((((((((((.(((((((((((....(((.....))).....)))))))))))..)))))))))))))))).)))..))...	93	36.4	-36.2	1	2	3.5	2	0	3.5	3.5	2.05949	3.01356	2.1462	0	3.48211	2.75896	low
347	256	PC-5p-215155_6	TTAACCAGAGAAATCACGGTGG	22	Sc0007942	-	1138	1277	tatgatccatttcattggtTTAAACAGAGAAATCACGGTGGagactctgattgattgattgagtaagcaagatcagtcctttctctctctctttctctctctACCGTGTTTCTCTGTATAAAGtgatgaactgggtcttg	5'	New	gp4	...((((((.((((((..((((.(((((((((.(((((((((((....((..((..((..(((...((.......))...)))..))..))..))..)))))))))))))))))))).))))..)))))).))))))...	134	39.3	-54.3	1	0	6	6	3	0	0	0	5.16611	6.4386	3.89112	0	0	low
347	257	PC-3p-13431_137	ACCGTGTTTCTCTGTCTAAAG	21	Sc0007942	-	1138	1277	tatgatccatttcattggtTTAAACAGAGAAATCACGGTGGagactctgattgattgattgagtaagcaagatcagtcctttctctctctctttctctctctACCGTGTTTCTCTGTATAAAGtgatgaactgggtcttg	3'	New	gp4	...((((((.((((((..((((.(((((((((.(((((((((((....((..((..((..(((...((.......))...)))..))..))..))..)))))))))))))))))))).))))..)))))).))))))...	134	39.3	-54.3	1	37	17	6	23	28	38	38.1006	14.6373	6.4386	29.8319	27.8569	29.9544	middle
348	258	PC-5p-78721_22	TCTGGCCCACCCCATATCCAAAGG	24	Sc0000011	+	1758827	1758990	agcaccaccaccaaaagaagTCTGGCCCACCCCATATCCAAAGGgattggcaggctgttcatgcacaatcctatcagcgcggattccaatcttagtcctaagttccatcatagcagcccaatccctttggatatggggtgggccagacttcttttggtggtggt	5'	New	gp4	...(((((((((((((((((((((((((((((((((((((((((((((((...((((((.(((...(((((.........))))).....((((....))))......))))))))))))))))))))))))))))))))))))))))))))))))))))))))	161	51.2	-110.3	1.3	4.5	3	3.5	0	0	4	4.63386	2.58306	3.75585	0	0	3.1531	low
349	258	PC-5p-78721_22	TCTGGCCCACCCCATATCCAAAGG	24	Sc0000011	-	1758930	1759093	aacaccaccaccaaaagaagTCTGGCCCACCCCATATCCAAAGGgattgggctgctatgatggaacttaggactaagattggaatccgcgctgataggattgtgcatgaacagcctgccaatccctttggatatggggtgggccagacttcttttggtggtggt	5'	New	gp4	...(((((((((((((((((((((((((((((((((((((((((((((((((((.((((......((((....)))).....(((((.........)))))...))))..))))...)))))))))))))))))))))))))))))))))))))))))))))))	161	50.6	-110.2	1.3	4.5	3	3.5	0	0	4	4.63386	2.58306	3.75585	0	0	3.1531	low
350	259	PC-3p-217082_6	AAATTCCTCCTCAAATTCCCCAAC	24	Sc0002123	+	314875	315028	gtgtttggttgggagatttggagagggatttggaaagggaaaggaaaaaagtgtgtgaaactaagtgaaatataagtatattttattcacatttcacctaccttttctatttttctttccAAATTCCTCCTCAAATTCCCCAACcaaacacaac	3'	New	gp4	(((((((((((((..(((((..(((((((((((((((..(((((((((..((..((((((...((((((((((....))))))))))....))))))..)).)))))).)))..)))))))))))))))..)))))..)))))))))))))...	151	35.1	-75.7	1.4	1.5	4	0	0	0	1.5	1.54462	3.44407	0	0	0	1.18241	low
351	259	PC-3p-217082_6	AAATTCCTCCTCAAATTCCCCAAC	24	xfSc0001187	+	356	510	tgtgtttggttgggagatttgggaagggatttggaaaggaaaagggaaaaaatgtgtgaaactaggtgaaatataagtatattttattcacatttcacctaccttttccatttcacttctAAATTCCTCCTCAAATTCCCCAACcaaacacagca	3'	New	gp4	((((((((((((((..(((((((.((((((((((((..((((.((((((....((.....)).(((((((((...((((.....))))...)))))))))...)))))).))))..)))))))))))).)))))))..))))))))))))))...	152	36.1	-69.7	1.2	1.5	4	0	0	0	1.5	1.54462	3.44407	0	0	0	1.18241	low
352	260	PC-3p-80473_22	AGTTTTGAGCCATTGTGACTACAA	24	Sc0002721	+	86977	87112	ccagagggtcacaatttttgtggccacaatggttcaaaattgtcaaaacgacgtcgttttggcatgttttgcacccaaaacgacgtcgttttgtcAGTTTTGAGCCATTGTGACTACAAaaattgtgaccttcaaa	3'	New	gp4	...((((((((((((((((((((.((((((((((((((((((.(((((((((((((((((((..((.....)).))))))))))))))))))).)))))))))))))))))).))))))))))))))))))))...	130	41.2	-92	1.6	7.5	5	0	0	0	2	7.7231	4.30509	0	0	0	1.57655	low
353	260	PC-3p-80473_22	AGTTTTGAGCCATTGTGACTACAA	24	xpSc0055016	+	13473	13622	aacaatgctagagggccacaatttttgtggccacaatggctcaaaattgtcaaaacgatgtcgttttggcatgttttacacctaaaatgacatcgttttagcAGTTTTGAGCCATTGTGACTACAAaaattgtgaccctcaaacattttc	3'	New	gp4	...((((...(((((.((((((((((((((.((((((((((((((((((..((((((((((((((((((..((.....)).))))))))))))))))))..)))))))))))))))))).)))))))))))))).)))))...))))...	144	38	-85	1.5	7.5	5	0	0	0	2	7.7231	4.30509	0	0	0	1.57655	low
354	261	PC-5p-74595_24	TAGGATGTGTCAATTTGGTCC	21	Sc0000731	+	451349	451561	ccaataaataatggtggttaagtttgatgaatggaaaatcaaatgatgtgtcaatttggtccctttagtttaTAGGATGTGTCAATTTGGTCCctgttgttttgactttcctacaaactatagggaccaaattgacacatcctataaactacaaggaccaaattgacacattatttgatttttcgtccattaaacttaaccgtcgttatttat	5'	New	gp4	...((((((((((..((((((((((((((.((((((((((((((((((((((((((((((((...((((((((((((((((((((((((((((((((.((((............)))).))))))))))))))))))))))))))))))))...)))))))))))))))))))))))))))))))).))))))))))))))..))))))))))	210	32.9	-133.6	1.9	2	0	2	0	4	4	2.05949	0	2.1462	0	3.97955	3.1531	low
355	261	PC-5p-74595_24	TAGGATGTGTCAATTTGGTCC	21	Sc0001223	+	327629	327774	aaatcaaatgatgttttaatttggtctctgtagtttaTAGGATGTGTCAATTTGGTCCctgtagtttataggaaagtcaaaacaacagagaccaaattgatatattctgtaaactacaggaaccaaattgaaacatcatatgacta	5'	New	gp4	...(((.((((((((((((((((((..((((((((((((((((((((((((((((((.((((.((((............)))).)))).))))))))))))))))))))))))))))))..)))))))))))))))))).)))...	140	30.8	-79.9	1.8	2	0	2	0	4	4	2.05949	0	2.1462	0	3.97955	3.1531	low
356	262	PC-5p-55153_34	AGTGATCCACACCACTCATGATGT	24	Sc0000416	+	553865	554046	caacatatatatatatacaggaaaatgagtgagaccctttttttagaggacccccacaagcctcaaAGTGATCCACACCACTCATGATGTgtgaggcccacaccatgagtggtgtggatcactttgggggttgtgggggttttcgaaaaagagggtctctatcattgttgatatatatgggg	5'	New	gp4	...(((((((((....(((.....((((..((((((((((((((.((..((((((((((.((((((((((((((((((((((((((..(((((.....))))))))))))))))))))))))))))))).))))))))))..)).))))))))))))))..)))))))..)))))))))...	176	44.5	-116.4	1.4	7.5	4	2	0	0	3.5	7.7231	3.44407	2.1462	0	0	2.75896	low
357	262	PC-5p-55153_34	AGTGATCCACACCACTCATGATGT	24	xpSc0054135	+	52340	52487	gaaaatgagcgagaccccatttttgggggagctccacaactcccagAGTGATCCACACCACTCATGATGTgtggggcccacatcatgagtggtgtggatcactttgggggttgtaagggtctccaaaaaggaggtctctatcattgtt	5'	New	gp4	...(((((..((((((((.((((((((((..((..((((((((((((((((((((((((((((((((((((.......)))))))))))))))))))))))))))))))))))).))..)))))))))))).))))))..)))))...	142	50.7	-99.5	1.3	7.5	4	2	0	0	3.5	7.7231	3.44407	2.1462	0	0	2.75896	low
358	263	PC-3p-122975_13	AATCACTGCTCAAATCCCCCAACC	24	Sc0000267	-	232528	232679	tgtttggttgggggatttggagagggatttggaaagggaaagggaaaaggtgtgtgaaactaggtgaaatgtaagtatattttattcacatttcacctaacttttcctttttcctttccaAATCACTGCTCAAATCACCCAACCaaacacag	3'	New	gp4	((((((((((((.(((((((..((.((((((((((((((((((((((((..((.....)).(((((((((((.((((.....)))).)))))))))))..)))))))))))))))))))))))).))..))))))).))))))))))))...	149	38.8	-82.4	1.4	3.5	0	0	1.5	1.5	0	3.60411	0	0	1.94556	1.49233	0	low
359	263	PC-3p-122975_13	AATCACTGCTCAAATCCCCCAACC	24	Sc0004157	+	123108	123259	tgtttggttgggggatttagggagagatttggaaagggaaagggaaaaggtgtgtaaatctaagtgaaatgtaagtatattttaatcacatttcacctaactttttctttttcctttccaAATCACTGCTCAAATCCCCCAACCaaacacag	3'	New	gp4	((((((((((((((((((..(.((.((((((((((((((((((((((((..(((.((((.....((((((((....)))))))).....)))))))....)))))))))))))))))))))))).)).)..))))))))))))))))))...	149	36.8	-77.4	1.4	3.5	0	0	1.5	1.5	0	3.60411	0	0	1.94556	1.49233	0	low
360	264	PC-5p-108443_15	CAGGGCGGTCCTCCTCTGGCA	21	Sc0000153	-	548955	549066	gaggggttagagaataaCAGGGCGGTCCTCCTCTGGCAaggagatcaccatgcaaacacatgcatacattctgctttgccaaaggagaattgccctgccattctctctcaca	5'	New	gp4	...(((..(((((((..((((((..(.(((((.(((((((((((.....(((((......)))))....))).)))))))).))))).)..))))))..))))))))))...	106	50	-51.6	0.9	0	3.5	2.5	0	0	1.5	0	3.01356	2.68275	0	0	1.18241	low
361	264	PC-5p-108443_15	CAGGGCGGTCCTCCTCTGGCA	21	Sc0000759	-	524145	524244	taaagaataaCAGGGCGGTCCTCCTCTGGCAaggagatcaccatgcaaacacatgcatacattctgctttgccaaaggagaattgccctgccattctctc	5'	New	gp4	...(((((..((((((..(.(((((.(((((((((((.....(((((......)))))....))).)))))))).))))).)..))))))..)))))...	94	48	-45.3	0.9	0	3.5	2.5	0	0	1.5	0	3.01356	2.68275	0	0	1.18241	low
362	265	PC-5p-496092_3	AACTCCCTTTGAATCTCAACCATT	24	Sc0002520	+	92104	92274	atcaatgattgagaccccctttttttggagacctccacAACTCCCTTTGAATCTCAACCATTgatggtgtgggctccatacatacatgagtgggtcccacaaatACATCAATGGTTGAGATCCAAAGGggcttgtgtaggtctccaaaaaaagggggtcccaaacattttt	5'	New	gp4	...((((.(((.((((((((((((((((((((((.(((((..(((((((.((((((((((((((((.((((((..(((..((....))..)))..))))))....)))))))))))))))).)))))))..))))).)))))))))))))))))))))).))).))))...	165	44.4	-107.9	1.4	0	3	0	0	0	0	0	2.58306	0	0	0	0	low
362	266	PC-3p-126956_12	ACATCAATGGTTGAGATCCAAAGG	24	Sc0002520	+	92104	92274	atcaatgattgagaccccctttttttggagacctccacAACTCCCTTTGAATCTCAACCATTgatggtgtgggctccatacatacatgagtgggtcccacaaatACATCAATGGTTGAGATCCAAAGGggcttgtgtaggtctccaaaaaaagggggtcccaaacattttt	3'	New	gp4	...((((.(((.((((((((((((((((((((((.(((((..(((((((.((((((((((((((((.((((((..(((..((....))..)))..))))))....)))))))))))))))).)))))))..))))).)))))))))))))))))))))).))).))))...	165	44.4	-107.9	1.4	5	3	4	0	0	0	5.14874	2.58306	4.2924	0	0	0	low
363	267	PC-5p-23856_79	AGTGATGTGTTGTATGGTTGA	21	Sc0000150	+	705673	705879	gagagaaaaaagtttatacaaaatgagtaaggattctctagagtttttttctctaaagtttcttagAGTGATGTGTTGTATGGTTGAgatttaatgacaagtcacatcaattttttagaattaaatctcatccatacaacaaattactttaggaaactttaggaaaaaaaaactctagagtatctttggtgtgctgctaggtctgcg	5'	New	gp4	...(((....(((.(((((........(((((((.(((((((((((((((.(((((((((((((((((((((.((((((((((.(((((((((((........................))))))))))).)))))))))).)))))))))))))))))))))..))))))))))))))).))))))))))))..)))...)))...	201	30.9	-82.3	1.3	10.5	3.5	6.5	5	9.5	4.5	10.8123	3.01356	6.97515	6.4852	9.45144	3.54723	middle
364	267	PC-5p-23856_79	AGTGATGTGTTGTATGGTTGA	21	Sc0000566	+	672785	672983	gacgcccaccgcccacagcaaggatcctctagagttttttttttctaaagtttcctagAGTGATGTGTTGTATGGTTGAgatttaatgctaaaaaattgatgtgacttgtcatgaaatctcaaccatataacacaccactctagaaaactttaggaaaaaaaaactctagaagatccttgctccaccgcccacggccat	5'	New	gp4	...(((....((....((((((((((.((((((((((((((((((((((((((.((((((((.(((((((((((((((((((((.((((...................).))).))))))))))))))))))))).)))))))).)))))))))))))))))))))))))).)))))))))).....))....)))...	193	40.2	-102.6	1.3	10.5	3.5	6.5	5	9.5	4.5	10.8123	3.01356	6.97515	6.4852	9.45144	3.54723	middle
365	268	PC-5p-98893_17	ATTGTGTGGTTGAGATTTACTAGT	24	Sc0002735	-	20707	20883	gagtaaggattctagagttattttttcttaaacttttttagagtgttatATTGTGTGGTTGAGATTTACTAGTaagtcacatcaatttttttgatgtgacttgtcagtaaatctcaaccacacaatgtagcactctaggaaactttaggaaaatttcactctagaggatccttagtg	5'	New	gp4	...(((((((((((((((....((((((((((.(((..((((((((((((((((((((((((((((((((..(((((((((((((.....)))))))))))))..))))))))))))))))))))))))))))))))..))).))))))))))....))))))))..)))))))...	171	32.2	-104	1.8	2.5	4	0	0	3	2	2.57437	3.44407	0	0	2.98467	1.57655	low
366	268	PC-5p-98893_17	ATTGTGTGGTTGAGATTTACTAGT	24	Sc0002736	-	3461	3637	agcaaggatcctctagagtgattttttcctaaagtttcctagagtattacATTGTGTGGTTGAGATTTACTAGCaagtcacatcaatttttctgatgtgacttgccagtaaatctcaaccacacaatgtaggactttaggaaactttagagaaatttcactctagaggatccttggt	5'	New	gp4	..(((((((((((((((((((..(((..(((((((((((((((((..((((((((((((((((((((((((.(((((((((((((.......))))))))))))).))))))))))))))))))))))))..)))))))))))))))))..)))..)))))))))))))))))))..	173	36.7	-127.7	2	2.5	4	0	0	3	2	2.57437	3.44407	0	0	2.98467	1.57655	low
367	269	PC-3p-95688_18	ATTTCGAGCCATTTGAACCACAAA	24	Sc0000309	+	528909	529060	tttgagggccacaatttttgtggctcaaatggctcaaaattatcaaaacgacgtcgttttgacaattttgaagttgttttgtactcacaacgacgtcgttttgacaATTTCGAGCCATTTGAACCACAAAaattgtgaccctcaatcattgc	3'	New	gp4	.(((((((.((((((((((((((.(((((((((((.(((((.((((((((((((((((.((((((((....)))))........))).)))))))))))))))).))))).))))))))))).)))))))))))))).))))))).......	144	38.2	-82.5	1.4	6	4	3	0	0	0	6.17848	3.44407	3.2193	0	0	0	low
368	269	PC-3p-95688_18	ATTTCGAGCCATTTGAACCACAAA	24	Sc0001333	+	553517	553660	aaaaatgtttgagggtcacaatttttgtggctcaaatggctcgaaattgtcaaaacgacaaatggcttgaaattgccaaaacgacgtcgttttggcaATTTCGAGCCATTTGAACCACAAAaattgtagccctcaaccattgct	3'	New	gp4	...((((.(((((((..(((((((((((((.((((((((((((((((((((((((((((...((((........)))).......)))))))))))))))))))))))))))).)))))))))))))..))))))).))))...	138	39.6	-86.6	1.5	6	4	3	0	0	0	6.17848	3.44407	3.2193	0	0	0	low
369	270	PC-3p-102098_16	TTTTGACAATTTCAAGCCATT	21	Sc0000726	+	720318	720464	tgtttgagggtcataatttttgtggttcaaatggttcgaaattgtcaaaacgacgtcgttttggcaatttcgaagttgttttgtactcaaaacgtcgTTTTGACAATTTCAAGCCATTtgagccacaaaaattgtggccctcaacca	3'	New	gp4	.(.(((((((((((((((((((((((((((((((((.(((((((((((((((((((.......((((...((....))..)))).......))))))))))))))))))).))))))))))))))))))))))))))))))))).).	145	38.1	-84.7	1.5	7.5	4	0	0	1.5	0	7.7231	3.44407	0	0	1.49233	0	low
370	270	PC-3p-102098_16	TTTTGACAATTTCAAGCCATT	21	xpSc0053759	+	88974	89134	aacaatggttgagggtcacaattttttgtgatttaaatggctcgaaattgtcaaaacgatatcgttttgagtacaaaacaactttgaaattgccaaaacaacgtcaTTTTGACAATTTCAAGCCATTtaagccacaaaaattatagccctcaaatattttt	3'	New	gp4	...(((..((((((((......((((((((..((((((((((.(((((((((((((.(((...((((((.(((((((.....))))....)))))))))...))).))))))))))))).))))))))))..)))))))).....))))))))..)))...	155	31.1	-60	1.2	7.5	4	0	0	1.5	0	7.7231	3.44407	0	0	1.49233	0	low
371	271	PC-3p-83822_21	AAATCTCTCCCCAAATTCTCCAAC	24	xpSc0053327	-	79780	79934	tgtgtttggttaagggatttgaggagagatttgaaaagagaaatggaaaaggtaggtgaaatgtgaaaaaatatgcctacatttcacatagtttcacacatttttttcctttcccttttcAAATCTCTCCCCAAATTCTCCAACcaaacacagcg	3'	New	gp4	(((((((((((..((((((((.((((((((((((((((.((((.(((((((....(((((((((((((.............))))))))...))))).....))))))))))).)))))))))))))))).))))))))..)))))))))))...	152	36.1	-70.7	1.3	3.5	6.5	5.5	0	0	6.5	3.60411	5.59662	5.90205	0	0	5.12378	low
372	271	PC-3p-83822_21	AAATCTCTCCCCAAATTCTCCAAC	24	xpSc0055055	+	4566	4719	gtatttggttgggggatttgaggaggaatttggaaagggaaataaaaaaggtaggtgaaatgtgaatgaaatatgtatacatttcacataatttcacataccttttccctttccttttctAAATCTCTCCCCAAATTCTCCAACcaaacacacc	3'	New	gp4	((.(((((((((((((((((.((((..(((((((((((((((...((((((((.((((((((((..((((((........))))))))).))))))).))))))))...)))))))))))))))..)))).))))))))))))))))).))...	151	35.7	-74.5	1.4	3.5	6.5	5.5	0	0	6.5	3.60411	5.59662	5.90205	0	0	5.12378	low
373	272	PC-3p-108814_15	AATCTCTTCCCAAATCCCTCAACC	24	Sc0000030	+	490662	490812	gtttggttgggagatttgggaatgaatttggaaaggaaaagggaaaaaggtagttgaaatgaaaataaaatatacctacatttcacctagtttcacacaccttttccctttctcattccaAATCTCTTCCCAAATCCCTCAACCaaacata	3'	New	gp4	(((((((((((.((((((((((.((((((((((.(..((((((((((.(((.((((((((.......((((........))))......)))))).)))))))))))))))..).)))))))).)))))))))))).)))))))))))...	148	35.8	-65	1.2	10.5	7	0	0	0	0	10.8123	6.02713	0	0	0	0	middle
374	272	PC-3p-108814_15	AATCTCTTCCCAAATCCCTCAACC	24	Sc0001281	+	160090	160242	gtgtttggttaagagatttgggaagggatttagaatgaaaaagaaaaaatttatgtgaaatttgaataaaatatacttacattcacttggtttcacacaactttttattttctttttctaAATCTCTTCCCAAATCCCTCAACCaaacacagc	3'	New	gp4	((((((((((.((.(((((((((((((((((((((.(((((...(((((.((.((((((((.(((((.............)))))....)))))))).)).))))).)))))...))))))))))))))))))))).)).))))))))))...	150	29.4	-59.6	1.3	10.5	7	0	0	0	0	10.8123	6.02713	0	0	0	0	middle
375	273	PC-5p-10056_180	TCGTGTTCATGGCATTTCATC	21	Sc0000084	+	789073	789154	gccgaTCGTGTTCATGGCATTTCATCaatctgtatgtcatctgcacattatttttgaTGAAATGCCATGAACAACGATCact	5'	New	gp4	...(((((((((((((((((((((((((.....((((.......)))).....)))))))))))))))))))).)))))...	76	39	-41.1	1.3	38	37	21	21	33	33	39.1304	31.8577	22.5351	27.2378	32.8313	26.013	middle
375	274	PC-3p-68236_27	TGAAATGCCATGAACAACGATC	22	Sc0000084	+	789073	789154	gccgaTCGTGTTCATGGCATTTCATCaatctgtatgtcatctgcacattatttttgaTGAAATGCCATGAACAACGATCact	3'	New	gp4	...(((((((((((((((((((((((((.....((((.......)))).....)))))))))))))))))))).)))))...	76	39	-41.1	1.3	5	7	3	6	5	9	5.14874	6.02713	3.2193	7.78224	4.97444	7.09447	low
376	275	PC-5p-296661_4	CAACCCCCTTTGGATCTCAACC	22	xpSc0057263	+	1072	1233	taattgagacccccttttttcggagacccccaCAACCCCCTTTGGATCTCAACCattgaaggtgtaggccccacacatacatgaataggttcaacacatacatcaatggttgagatctaaaagggattgtgaaggtctccaaaaaaaggggggtctcaagca	5'	New	gp4	...(((((((((((((((((.(((((((..(((((.(((.(((((((((((((((((((..((((.(..((....((....))....))..).)))).....))))))))))))))))))).))).)))))..)))))))..)))))))))))))))))...	156	45.7	-89	1.2	4	0	0	0	4	0	4.11899	0	0	0	3.97955	0	low
377	276	PC-3p-206471_7	CACATCTGTGTCCCATTTTGT	21	Sc0000005	+	2438179	2438307	atgctaggagcacaaaagattttcacaaaatgggacacaaatgtgatacaaaggatggcacatgtgggtcccacacctttgtctCACATCTGTGTCCCATTTTGTgaaaatcttttgcgcacttagatt	3'	New	gp4	...(((((.((.(((((((((((((((((((((((((((.((((((.(((((((.(((.((......)).)))..))))))).)))))).))))))))))))))))))))))))))).)).)))))...	123	41.1	-73.8	1.4	0	3	0	0	0	8	0	2.58306	0	0	0	6.30619	low
378	277	PC-5p-235900_5	ATCAAATGATGTTTCAGTTTGGCC	24	Sc0000059	+	1047738	1047886	agaaaATCAAATGATGTTTCAGTTTGGCCcctgaagtttacaggatatatcaatttggttcctgtagtttatagaaaagtcaaaacaacaagaaccaaattgatatatcctgtaaactataaggactaaattaaaatatcatttgattt	5'	New	gp4	...((((((((((((((((.(((((((..(((..(((((((((((((((((((((((((((.(((.((((............)))).))).)))))))))))))))))))))))))))...))).))))))).))))))))))))))))	146	28.2	-70.7	1.7	9	0	0	0	0	3	9.26772	0	0	0	0	2.36482	low
379	278	PC-5p-187200_7	AGAATTATGACCCTTGGATTACCT	24	Sc0000804	+	204455	204673	tatctatctatctatctatatattatagagaaaagctaaggatcatgaaaaaactttcatgaaaatgatcataaaAGAATTATGACCCTTGGATTACCTtgattagtgtgtggtgctttattttaagtgtaatccaagagtcataaatctttcatgatcattttcataaaaaaaaattcatgatacctagtattgctcattattatataaggaaaatgg	5'	New	gp4	...((((...(((...((((((.((..(((....(((.(((((((((((.....(((.((((((((((((((.(((((.(((((((.(((((((((((((((..(((.......))).....))))).)))))))))).))))))).))))).)))))))))))))).))).....)))))))).))))))....)))..)).)))))).)))..))))	216	26.5	-72.3	1.2	7	0	0	0	0	0	7.20823	0	0	0	0	0	low
380	279	PC-3p-147540_10	AGAACCAACATTGTGAGCAACAGA	24	Sc0000124	+	538573	538777	ttttcctgatttgtagtctgttgtttgcaatgttggttcttaggttattactgaagaggttttgacatcgtgttctggaggtccagaaaatgatgccaaaacctctttagtaataacctgAGAACCAACATTGTGAGCAACAGActacaaatcgagaaaattaaaaggttgaaacttcaatacaggatgagccaatgcagattga	3'	New	gp4	(((((..((((((((((((((((((..(((((((((((((((((((((((((((((((((((((.((((((.((((((....)))))).)))))).)))))))))))))))))))))))))))))))))))))..))))))))))))))))))..))))).......(((((....))))).(((..((........))..))).	160	37.1	-118.3	1.6	10	24	0	0	0	0	10.2975	20.6644	0	0	0	0	middle
381	280	PC-3p-300598_4	ATCCCTCCCCAAATCTTCCAT	21	Sc0001028	-	208656	208805	gtttggttgagggatttgaggagggatttggaaatggaaatggaaaaggtaggtgaaatatgaataaaacatgcctaaatttcacatagtttcacacaccttttccctttcccattctaaATCCCTCCCCAAATCTTCCAAccaaacaca	3'	New	gp4	(((((((((..(((((((.((((((((((((((..(((((.(((((((((..(((((((.((((................))))....)))))))..))))))))).)))))..)))))))))))))).)))))))..)))))))))...	147	38.7	-76	1.3	3	0	3	0	0	4	3.08924	0	3.2193	0	0	3.1531	low
382	281	PC-3p-118155_14	AGTCCCTTCTTAAATCTCCCAACC	24	Sc0004604	-	40809	40960	tgtttggttgggggatttggggagggatttgaaaagaaaaatggaaaaggtaggtgaaatatgaataaaacatgcctatatttcacctagtttcacacactttttccctttccctttctaAATCCCTTCTTAAATCTCCCAACCaaacacag	3'	New	gp4	((((((((((((((((((..((((((((((..((((..(((.(((((((((((((((((((((.............))))))))))))..........))))))))).)))..))))..))))))))))..))))))))))))))))))...	149	37.5	-73.1	1.3	9	12	3	0	0	4	9.26772	10.3322	3.2193	0	0	3.1531	middle
383	282	PC-5p-127057_12	AAGTTTCCTACAGTGTTACATTGT	24	Sc0001728	-	46392	46570	caccaaggatcctttagagtgaaattttcctaAAGTTTCCTACAGTGCTACATTGTgtggttgagatttactagcaagtcacatcagaaaaattgatgtgacttgccagtaaatcttaaccacacaatgtagcactctaagaaactttagagaaaaatcactttagaggatccttgctc	5'	New	gp4	...(((((((((((((((((((..(((((((((((((((.((.(((((((((((((((((((((((((((((.((((((((((((((.....)))))))))))))).))))))))))))))))))))))))))))).)).)))))))))).))))).)))))))))))))))))))...	173	36.9	-117.9	1.8	4	2	0	0	0	0	4.11899	1.72204	0	0	0	0	low
384	283	PC-3p-151061_10	AACCACATAATGCACCACTCTAGG	24	Sc0003526	+	141209	141376	caccaaggattctctagagtgtttttttcctaaagtttcctaaagtggtgtattgtgtggttgagatttaatgctgaaaaattgatgtgacttgtcattaaatctcAACCACATAATGCACCACTCTAGGaaactttaggaaaaaaaaactctagaggatccttgctt	3'	New	gp4	...(((((((((((((((((.(((((((((((((((((((((.(((((((((((((((((((((((((((((((...................).)))))))))))))))))))))))))))))).))))))))))))))))))))).)))))))))))))))))...	162	35.1	-106.6	1.8	9	0	4	0	0	0	9.26772	0	4.2924	0	0	0	low
385	284	PC-3p-32406_59	ATTCTGCCAAAGCCTCACCTTGT	23	Sc0000630	-	333701	333863	tttgaggggaaacataacaaaaggtgaggtttaagtagaatggttaaggttcatggtaagtcctaggttaggagttcaaaacttatctctagcatccttgaaccttaacctaacctatccATTCTGCCAAAGCCTCACCTTGTgttatgttcccctcaaataa	3'	New	gp4	(((((((((.(((((((((.((((((((((((..(((((((((...(((((...((.....)).((((((((.((((((..................)))))))))))))))))))..)))))))))..)))))))))))).))))))))))))))))))...	160	39.3	-79	1.2	17	6	7	5	11	35	17.5057	5.16611	7.5117	6.4852	10.9438	27.5896	middle
386	285	PC-3p-196297_7	AAATCTCTCATCAAATCCCTCAAC	24	Sc0003448	+	160741	160895	tgtgtttggttaggggatttggtgaaggatttggaaagggaaagggaaaaaatgtgtgaaactatgtgaaatgtaggtattttttttcacatttcacctatcttttccatttccctttccAAATCTCTCATCAAATCCCTCAACcaaacacaaca	3'	New	gp4	(((((((((((..((((((((((((..((((((((((((((((.((((((.((..(((((...((((((((.............)))))))))))))..)).)))))).))))))))))))))))..))))))))))))..)))))))))))...	152	36.1	-84.5	1.5	3	4	0	0	0	7	3.08924	3.44407	0	0	0	5.51792	low
387	286	PC-3p-120417_13	AATCACTCTCCAAATCCCTCA	21	Sc0001310	-	185999	186150	tgttttgttgggggatttgaggagggatttggataggaaaatggaaaagataggtgaaatgtaaataaaacatgccaatatttcacttagtttcacacaccttttccctttctctttccaAATCACTCTCCAAATCCCCCAaccaaacacag	3'	New	gp4	(((((.(((((((((((((..(((.((((((((.((..(((.(((((((.((((((((((((...............))))))))))))((.....))..))))))).)))..)).)))))))).)))..))))))))))))).)))))...	149	38.2	-66.9	1.2	7	6	0	0	3	4	7.20823	5.16611	0	0	2.98467	3.1531	low
388	287	PC-5p-14209_130	TCCCTCAAGGACTTCTGACCT	21	Sc0000422	+	838300	838434	ttcaaggcattggttgctcactcTCCCTCAAGGACTTCTGACCTtgccttggggctaccaacaacctcaagatataggggtacttgtggttgggttagaaggacttgagggagaatgaacaagtcatgtcttatt	5'	New	gp4	...((((((.((((((.(((.(((((((((((..(((((((((..(((....)))......(((((.((((.(((....))))))).))))))))))))))..))))))))))).))).))).)))))))))...	129	46.7	-64.8	1	19	26	32	11	27	22	19.5652	22.3865	34.3392	14.2674	26.862	17.342	middle
389	288	PC-3p-262376_4	TTCGATCCCCAGCAGAGTCGCC	22	Sc0001647	+	413054	413272	tgaactgtagtgagtccatatgaacagaactcgggattcatcctcccaggacgtttggggacgtctacagtttttggtgactctgctggggattgaactggggattcatcctgaactgggTTCGATCCCCAGCAGAGTCGCCagaaactgtagacgtccccgaacatcccgggaggatgaatcccccgttctgttcatatgggctcactacagttcagg	3'	New	gp4	((((((((((((((((((((((((((((((..(((((((((((((((.(((.(((((((((((((((((((((((((((((((((((((((((((((((((((.....))))......))))))))))))))))))))))))))))))))))))))))))))))).))).)))))))))))))))..))))))))))))))))))))))))))))))..	217	52.5	-187.6	1.6	4	0	3	3	0	0	4.11899	0	3.2193	3.89112	0	0	low
390	289	PC-3p-3315_497	TTTTGACAGTTTTGGACCATT	21	xfSc0031059	-	902	1037	tttgagagtcacaatttgtgtggctcaaatggctcaaaactgtcaaaacgacgtcgttttggcatgttttgtgctcaaaacaacgtcgTTTTGACAGTTTTGAACCATTtaagtcacaaaaattatgaccctctac	3'	New	gp4	...(((.((((.(((((.(((((((.((((((.(((((((((((((((((((((.((((((((((.....)))).)))))).))))))))))))))))))))).)))))).))))))).))))).)))).)))...	130	38.2	-74.7	1.4	96.5	82.5	56.5	53	45	39.5	99.3706	71.034	60.6302	68.7431	44.77	31.1368	middle
391	290	PC-5p-13700_135	GTTTGGCTGGAGGATTTGGAAAAG	24	Sc0004959	-	95350	95489	aaagctgtGTTTGGCTGGAGGATTTGGAAAAGagagagggaaaaagtagtgaaatgtgaataaaatatatctacatttcacctagttttacacatttttttccttttctttttccaaatccctcaaccaaacacggtgta	5'	New	gp4	...(((((((((((.((..((((((((.((((((((((((((((((..(((((((((..(((.....)))..)))))))))...((.....))..))))))))))))))))))))))))))..)).)))))))))))...	134	34.3	-63	1.3	65	17	20	42	14	76	66.9336	14.6373	21.462	54.4756	13.9284	59.9088	middle
392	291	PC-3p-53101_35	CACCCATACAACACACCACTT	21	Sc0002144	+	127619	127784	agcgaggatcctctagagttttttttccctaaagttttctagagtggtgtgttgtatggttgagatttaatgacaagtcacatcaattttttagcattaaatctCACCCATACAACACACCACTTtaggaaactttaggaaaaaaaaactctagaggatccttagt	3'	New	gp4	...(((((((((((((((((((((((.((((((((((((((((((((((((((((((((.((((((((((((..(((............)))..)))))))))))).)))))))))))))))))))))))))))))))).)))))))))))))))))))))))...	160	34.9	-105.7	1.8	1.5	1.5	2.5	6.5	5	3.5	1.54462	1.29153	2.68275	8.43076	4.97444	2.75896	low
393	292	PC-5p-17960_104	AAGTGGTGTGTTGTATGGGTG	21	xfSc0000078	+	332855	333021	accaaggatcctctaaagttttttttttcctaaagtttcctaAAGTGGTGTGTTGTATGGGTGagatttaatgctaaaaaattgatgtgacttgtcattaaatctcaaccatacaacacaccactctaggaaactttagggaaaaaaaactctagaggatccttact	5'	New	gp4	...((((((((((((.((.(((((((((((((((((((((((.(((((((((((((((((.(((((((((((((...................).)))))))))))).))))))))))))))))).))))))))))))))))))))))))).))))))))))))...	161	34.1	-97.7	1.7	8.5	10.5	12.5	2.5	9	9	8.75285	9.04069	13.4138	3.2426	8.954	7.09447	middle
394	293	PC-5p-342873_3	TAATCGGACATCGTTAATCCTTTC	24	Sc0003402	-	180988	181145	acttaaaaaattaagtTAATCGGACATCGTTAATCCTTTCatctactcacatttctatcttaaaaaataaatgatattgtaatttaaggtattaaaatgaataaaaatgtgagtagatgaaatggttaacgatatccgataaatttaagtttttacaa	5'	New	gp4	...((((((.(((((((.((((((.((((((((((.((((((((((((((((((.(((((((((..((((......))))..))))))))).............)))))))))))))))))).)))))))))).)))))).))))))).))))))...	152	22.8	-58.2	1.6	1.5	4.5	0	0	0	0	1.54462	3.87458	0	0	0	0	low
395	294	PC-3p-149198_10	AATCAGTCTTCAAATCCCCCAACC	24	Sc0000005	+	1035539	1035690	tgtttggttgggggatttgggaagggatttggaaagggaaagggaaaaggtgtgtgaaactatgtgaaatataaacatgttttattcacatttcacctaccttttccatttcgctttccaAATCACTCTTCAAATCCCCCAACCaaacacag	3'	New	gp4	((((((((((((((((((((..((.(((((((((((.((((.(((((((((..((((((....(((((((((....))))))))).....))))))..))))))))).)))).))))))))))).))..))))))))))))))))))))...	149	39.5	-84.5	1.4	4	3	3	0	0	0	4.11899	2.58306	3.2193	0	0	0	low
396	295	PC-3p-203024_7	ACGTCGGTTTAGCAATTTCAAGCC	24	xpSc0056874	+	12837	13025	aacattatggaaaatgtttgagggtcacaatttttgtggttcaaatggctcaaaattgttaaaacgacgtcgttttggcaattttgaaattgttttgtactcaaaacgACGTCGTTTTAGCAATTTCAAGCCatttgagccacaaaaattgtggccctcaatcattgctgaaacattatacataattaa	3'	New	gp4	...((((((...((((((((((((((((((((((((((((((((((((((..(((((((((((((((((((((((((((((((....))))))........)))))))))))))))))))))))))..)))))))))))))))))))))))))))))))))...........)))))...))))))...	183	33.3	-100.2	1.6	7	3	0	0	0	0	7.20823	2.58306	0	0	0	0	low
397	296	PC-5p-197373_7	AGCTTTAGTGATGTGGAAAGGAGT	24	Sc0001762	-	11756	11879	taaagaaAGCTTTAGTGATGTGGCAAGGAGTggggtccatatgtgatgtgatgtgtgtgtctatgtttttgtttttgtttttattttttattttcctcttaccacatcactagagctctctatc	5'	New	gp4	...(((.((((((((((((((((..(((((..(((..((((..(......)..))))..)))...................((.....)).....))))).)))))))))))))))).)))...	118	35.5	-38.1	0.9	3	8	0	0	0	0	3.08924	6.88815	0	0	0	0	low
398	297	PC-3p-120114_13	CTTTCCAAATCCCTCCCCGT	20	xpSc0057198	-	7664	7828	aatgctgtgtttggttaggggatttgaggagggatttgaaaaagaaaatggaaaagataggtgaaatgtgaataaaacatgcctatatttcacctagtttcacacacattttccattttcCTTTCCAAATCCCTCCCCGAatccctcaaccaaacacagcgtaag	3'	New	gp4	.(((((((((((((((..((((((((.(((((((((((.(((.((((((((((((..(((((((((((((.............)))))))))))))............)))))))))))).))).))))))))))).))))))))..)))))))))))))))...	161	38.8	-88.2	1.4	0	6	0	3	0	4	0	5.16611	0	3.89112	0	3.1531	low
399	298	PC-5p-28086_68	AAATGTTTTATCAAACCTCTCACA	24	Sc0000541	+	751241	751389	gttatgttagggatcctaaataaaatatcAAATGTTTTATCAAACCTCTCACAtggatgtgagattcacgcaaattacatgtgtgtgccatacccatatgagagatttgataaaatatttgataatttatttaaaatctctaacatttt	5'	New	gp4	...(((((((((((..((((((((.(((((((((((((((((((.((((((.((((.((((.....((((((.......))))))...)))).)))).)))))).))))))))))))))))))).))))))))..)))))))))))...	143	28.2	-64.1	1.5	26.5	28	4	5	3	9.5	27.2883	24.1085	4.2924	6.4852	2.98467	7.4886	middle
400	299	PC-3p-196758_7	AAATGCTACCGAGGATCCGGATTC	24	xpSc0053383	+	82000	82125	tcaagaatccggatcctcggtagcattttcctatcgccatttcctgtagccccccaaaacgacgtcgttttggggggctacaggaaatggcgataggaAAATGCTACCGAGGATCCGGATTCtatt	3'	New	gp4	...((((((((((((((((((((((((((((((((((((((((((((((((((((((((((....))))))))))))))))))))))))))))))))))))))))))))))))))))))))))...	120	50	-120.7	1.9	10	0	0	0	0	0	10.2975	0	0	0	0	0	middle
401	300	PC-3p-219720_6	ATTTCCGTTTCCAAATCCCTTCCC	24	xfSc0000035	+	421112	421278	ttaatgttgtgtttggttaggagatttggggatggatttgaaaagggaaagagaaaatgtgtgtgaaattaggtgaaacatatatatattttattcacatttcacctacttttttcATTTCCGTTTCCAAATCCCTTCCCaaatctccaaaccaaacacaacataaa	3'	New	gp4	...(((((((((((((((.(((((((((((((.(((((((.(((.((((((((((((.((..(((((((...(((((................))))))))))))..))))))))).))))).))).))))))).))))))))))))).)))))))))))))))...	161	32.3	-79.1	1.5	8	0	3	0	0	3	8.23798	0	3.2193	0	0	2.36482	low
402	301	PC-3p-131698_12	ATTTGAGCCACACTTTTTGTGACC	24	Sc0000162	+	684112	684247	gtagagggccacaaaaagtatggctcaaatggctcaaaactgccaaaacgacgtcgttttgggcgtaaaacgacgcaaaacgacgtcgttttgacagttttgagccATTTGAGCCACACTTTTTGTGACCctcaaa	3'	New	gp4	...(((((.((((((((((.((((((((((((((((((((((.(((((((((((((((((..((((......))))))))))))))))))))).)))))))))))))))))))))).)))))))))).)))))...	130	45.6	-95.6	1.5	6	3	0	3	0	0	6.17848	2.58306	0	3.89112	0	0	low
403	302	PC-3p-103945_16	TTTCCCTCCCCAAATCCCCAC	21	xpSc0054010	-	53940	54071	tcaaggatttgggaagggatttgtgaagggaaaagaaaaaggatgggaaaagtgtataaaatagaagttaaaatttttcacttttcccttccctttttcTTTCCCTCCACAAATCCCCACtcaaatccttca	3'	New	gp4	..(((((((((((..((((((((((.((((.(((((((((((..((((((((((...(((((..........))))).))))))))))...))))))))))))))).))))))))))..)))))))))))..	128	36.4	-66.8	1.4	1.5	0	0	0	2	4.5	1.54462	0	0	0	1.98978	3.54723	low
404	303	PC-5p-4447_386	CGTGCTAAAGAGCGTGGAG	19	Sc0004271	-	112099	112247	ctcaaaatctCGTGCTAAAGAGCGTGGAGgttcgagtcctcttcaaggcataatattgagaatgctcgttgaatgagcaatttaataagagagctcagatcgaatcgataagaggactcgaacctcaacgctcttcagcacgagatttt	5'	New	gp4	...(((((((((((((.((((((((.(((((((((((((((((...(((((..........)))))..((((.(((((..(((....)))..)))))..))))......))))))))))))))))).)))))))).)))))))))))))	146	43	-78.2	1.2	28	28	35	81	118	99	28.8329	24.1085	37.5585	105.06	117.397	78.0391	middle
405	304	PC-3p-7062_252	TTTGCCGCCTTTCCACATAGT	21	Sc0003021	+	119482	119723	gaatttctgactcggtcatctttgtgagagagagagagattgtgtggaaaggcggcaaaaactgttttgtgttttgaaagggaattaggtaaaatgtggtatccaaaacataatacagttTTTGCCGCCTTTCCACATAGTcaccctctctctctctttctcaaacatgaccgagtcacagaattccatttccaagtggtactccagcatcctccgccgcctcctttgcacagacagcctcc	3'	New	gp4	((((((.((((((((((((.((((.((((((((((((((((((((((((((((((((((((((((.((((((((((...........................)))))))))).))))))))))))))))))))))))))......)))))))))))))).)))).))))))))))))..)))))).........(((((...............)))))......................	186	45	-110.4	1	46.5	59	33	49	75	109	47.8832	50.8001	35.4123	63.5549	74.6166	85.9219	middle
406	305	PC-3p-166550_9	GTTTTGAGCCATTTGAACCACACT	24	Sc0003591	+	91422	91557	tagagggccacaaaaagtgtggctcaaatggcttaaaactgtcaaaacgacgtcgttttgtgcgtaaaaaacgacgcaaaacgacgtcgttttgacaGTTTTGAGCCATTTGAACCACACTttttgtggccctgaa	3'	New	gp4	...(((((((((((((((((((.((((((((((((((((((((((((((((((((((((((((((.....))).))))))))))))))))))))))))))))))))))))))).)))))))))))))))))))...	130	43.4	-106.7	1.8	11	3	0	0	0	0	11.3272	2.58306	0	0	0	0	middle
407	306	PC-3p-134668_11	ATCCCTCCTCAAATCCTCCAT	21	Sc0001290	-	114549	114698	gtttggttgagggatttgaagagggatttggaaagggaaatggaaaaggtaggtgaaatatgaataaaacatgcttaaatttcacatagtttcacacatgttttccttttccctttctaaATCCCTCCTCAAATCCTCCAAccaaacaca	3'	New	gp4	(((((((((..((((((((.((((((((((((((((((((.((((((..(..(((((((.((((................))))....)))))))..)..)))))).)))))))))))))))))))).))))))))..)))))))))...	147	36.7	-76.8	1.4	0	0	3	3	5	0	0	0	3.2193	3.89112	4.97444	0	low
408	307	PC-5p-72505_25	AATTTCTTTGTCCCCTGTCCCAAT	24	Sc0000309	-	933691	933852	caaggattctctgtcccaaAATTTCTTTGTCCCTTGTCCCAATgcactctcaactattgaatcatgtaagaatatcgaggcatgtgaatcttaagacatgatttactacttagcagtgaattgagacaggggatagagaaatttatgactagagaattccct	5'	New	gp4	...((((((((((((...((((((((((((((((((((.((((.((((((.((.((.((((((((((((((...(((.......))).))))...)))))))))).)).)))).)))).)))).))))))))))))))))))))..))).)))))))))...	156	37.7	-62.2	1	26	15	0	0	3	10	26.7734	12.9153	0	0	2.98467	7.88274	middle
409	308	PC-3p-136020_11	ATTCATCTCCCCTTTTCCCCCACC	24	xpSc0053249	+	427623	427826	aaagagcaggaaaaaaaagaaaaagaaaaagaaaatgtaaccaatgagagagagagggggtcaaagggggtgggaggaaaaggggggatgaatcattgttttttttttcaacaatgATTCATCTCCCCTTTTCCCCCACCccttttgaccccctctctctctcattggttatattttcttttttttctttttttcctgctcctc	3'	New	gp4	...(((((((.((((((((((...((((((((((((((((((((((((((((((((((((((((((((((((((.(((((((((((((((((((((((((.........))))))))))))))))))))))))))))))))))))))))))))))))))))))))))))))))))))))))))))))))))))))))))))...	198	39.7	-157.7	1.9	0	8	4	0	0	7	0	6.88815	4.2924	0	0	5.51792	low
410	309	PC-5p-45916_41	GAATGTTGGAGTCTTTGAGATC	22	Sc0002237	+	9322	9469	aatgtgGAATGTTGGAGCCTTTGAGATCaattgaagacttactcttcttttagttgttgatgttcattcaactttcgtnaaacatttgttatagttagattgatcagagaagtttccaattgtcctcaaaggcttccaatattccatt	5'	New	gp4	...((((((((((((((((((((((..((((((.((((((.((((....(((((((((((.......)))))........(((....))).......))))))..)))))))))).))))))..))))))))).))))))))))))).	144	33.1	-56.8	1.2	26	54	21	0	6	31	26.7734	46.495	22.5351	0	5.96933	24.4365	middle
411	310	PC-3p-108027_15	TTTGAGCCATTTGAGTCACCG	21	Sc0002007	-	11877	12010	ttacggaaaatgtttgagggccacaaaatcagtggctcaaatggctcaaaactgccaaaacgacgtcgtttgtcgttttggcagtTTTGAGCCATTTGAGTCACTGattttgttgccctctagcattgctgata	3'	New	gp4	...(((..((((((.((((((.(((((((((((((((((((((((((((((((((((((((((((.....))))))))))))))))))))))))))))))))))))))))))).)))))).)))))).)))...	128	43.3	-96.2	1.7	13	0	0	3	3	12	13.3867	0	0	3.89112	2.98467	9.45929	middle
412	311	PC-5p-233332_6	AAATTTTTGGCCAGACCTTTCACA	24	Sc0000862	+	484189	484353	aatgggttatgttagagactttaaataatttactAAATTTTTGACCAGACCTTTCACAtgggtatgaaattcacacatacatagttttgtgtgggttctacactcatgtgagaagtttggtataaaatttggtaaatcatttggggtctatagtattttcccttc	5'	New	gp4	...(((..((..((.(((((..((((.((((((((((((((..(((((((.((((((((((((.(..((..((((((..........))))))..))..).)))))))))))).)))))))..)))))))))))))).))))..))))).))..))...)))...	159	32.1	-68.2	1.3	3	0	0	0	0	3	3.08924	0	0	0	0	2.36482	low
413	312	PC-5p-79633_22	CAACCCCCTTTGGATCTCCACT	22	Sc0003789	+	91730	91878	aaaaatgcttgagacccccattttttagagacccccaCAACCCCCTTTGGATCTCCACTattgatgtatgtgtggggtctacaccatcaatagtggagatctaaaggggattgtgggggtctccaaaaaaaggggtctcaatcattgtt	5'	New	gp4	...((((.((((((((((..((((((.(((((((((((((.(((((((((((((((((((((((((...((((((...))))))))))))))))))))))))))))))).))))))))))))).)))))).)))))))))).))))...	143	45	-103.3	1.5	0	0	0	3	1.5	6.5	0	0	0	3.89112	1.49233	5.12378	low
414	313	PC-3p-180347_8	TTTCCCCTTCTCCCACCTAC	20	Sc0001279	+	200870	201020	caagggggactacatggaggtgggagaaagggaaaaaaattaccaatacatggaggggtgcaagtgatttgcaccccaccatagacacacttgcgcccccatgtgtttataatcttTTTCCCCTTCTCCCACCTACatatagttcccccat	3'	New	gp4	...(((((((((.(((.(((((((((((.((((((((.((((..((((((((..((((((((((((.....................))))))))))))))))))))..)))).)))))))).))))))))))).))).)))))))))...	145	47.7	-82.8	1.1	0	0	0	0	0	12	0	0	0	0	0	9.45929	low
415	314	PC-5p-103150_16	AAACGACGTCGTTTGCCTTGCACT	24	Sc0003593	+	27582	27731	gtggcaAAACGACGTCGTTTGCCTTGCACTacaggatgcgctgcaggaaaaccctgcagaggatccggattcatttcagtcgaatccaaatcctctgaggggttttcctacaacgcatcctgcagtgcaatgcaaacgatgtcgttttgc	5'	New	gp4	...(((((((((((((((((((.(((((((.(((((((((.((.((((((((((..((((((((..((((((.........))))))..))))))))..)))))))))).)).))))))))).))))))).)))))))))))))))))))	147	50.7	-102.6	1.3	12	0	0	4	0	0	12.357	0	0	5.18816	0	0	middle
416	315	PC-3p-220307_6	AATCCCTCCTGAAATCCTTCAACC	24	Sc0002129	-	209709	209858	tatttggttggaagatttgaagagggatttggaaaaggaaagggaaaagtttagtgaaatgtgaataaaatatacctacatttcacctagtttcacacacattttccctttccttttctaAATCCCTCCTCAAATCCTTCAACCaaacat	3'	New	gp4	..((((((((((.(((((((.(((((((((((((((((((((((((((.....((((((((((((................)))))...))))))).....))))))))))))))))))))))))))).))))))).))))))))))...	145	34	-76.7	1.5	0	6	0	0	4	0	0	5.16611	0	0	3.97955	0	low
417	316	PC-3p-37557_51	TCATTCATACAACACACCACT	21	Sc0000012	-	478118	478211	aaaagagttggtgtgttgtatgggtgagatttaatgctaaaaaattgatgtgacttgtcattaaatcTCAATCATACAACACACCACTctagga	3'	New	gp4	...((((.((((((((((((((..(((((((((((((...................).))))))))))))..))))))))))))))))))....	87	34	-43.2	1.4	20.5	12	16	0	0	7	21.1098	10.3322	17.1696	0	0	5.51792	middle
418	317	PC-5p-52982_35	AATCCTCCTTGCAACGGCTGAGAT	24	Sc0003339	+	190633	190782	ctccttgcAATCCTCCTTGCAACGGCTGAGATcgactgttacaacttccaacgactgatttcaatttctttattttatttatttatttttttatgaccgttggatgttgcaatagctgatctcatccattgcaagaaggattgcaagaag	5'	New	gp4	...(((((((((((.(((((((.((.(((((((..(((((.((((.(((((((..((....))...................((((......)))).))))))).)))).)))))..))))))).)).))))))).)))))))))))...	144	37.3	-62.2	1.1	19.5	10.5	6.5	0	6	0	20.0801	9.04069	6.97515	0	5.96933	0	middle
419	318	PC-3p-167937_9	ACTACACAATGCACCACTCTAAGA	24	Sc0000163	-	188457	188637	tatggaacaccaaggatcctctagagtgttttttttcctaaagttttctaaagtagtgtattgtgtggttgagatttaatgctgaaaaattgatgtgacttatcattaaatctcaACTACACAATGCACCACTTTAAGAaactttaaggaaaaaaaaactctagaggatctttgctcctta	3'	New	gp4	...(((....(((((((((((((((((.((((((((((((((((((..((((((.((((((((((((((((((((((((((.(((...((....))...))).)))))))))))))))))))))))))).))))))..)))))))).))))))))))))))))))))))))))).)))...	175	32	-95	1.6	6	0	0	0	0	3	6.17848	0	0	0	0	2.36482	low
420	319	PC-3p-42552_45	AATCTACCGGACTGTTAGTCTTGG	24	Sc0001949	+	88161	88321	tggggataatgtaacccaagactaacagtctagtggattacaatctccccttatccaatctatccaaacaaacacacctagggcatgtttgtttgaacggactaaataaggagagattatAATCTACCGGACTGTTAGTCTTGGgatacattgtctctgga	3'	New	gp4	.((((((((((((.((((((((((((((((..((((((((.((((((.((((((....(((...((((((((((..((...))..))))))))))...)))....)))))).)))))).))))))))..)))))))))))))))).))))))))))))...	157	40.4	-85.4	1.3	26	16	6	0	0	7	26.7734	13.7763	6.4386	0	0	5.51792	middle
421	320	PC-5p-85243_20	ACCCCCTTACTGATCTACACCATT	24	Sc0001707	+	314296	314465	aaaaatgagtgagaccccctttgtggaggacccccacaACCCCCTTACTGATCTACACCATTcatgatgtatggggcccactcatgtatgtgtggggtccacatcatgaatagtgtggatcacaaaggaggttgtgggggtcctccacaaagggggtctctatcattgct	5'	New	gp4	...(((((..(((((((((((((((((((((((((((((((.((((..((((((((((.(((((((((((..((..(((((.((....)).)))))..))))))))))))).))))))))))..)))).)))))))))))))))))))))))))))))))..)))))...	164	50.6	-125.1	1.5	9	6.5	0	0	0	2.5	9.26772	5.59662	0	0	0	1.97069	low
422	321	PC-5p-176608_8	TTTTAGAGTGGTGTATTGTGT	21	Sc0004166	+	118627	118788	taatagcagagtcaggattctttagagttttttttttaaaaaatgTTTTAGAGTGGTGTATTGTGTggttgagatttaatgtcaattaaatctcaactacacaatgcatcactttaaaaaattttaagaaaaaaacactctagaagatccttggtggtaata	5'	New	gp4	...((.((...(((((((..((((((((.((((((((..(((((.(((((((((((((((((((((((((((((((((((....))))))))))))))))))))))))))))))))))).)))))..)))))))).))))))))..))))).)))).))...	156	27.8	-74.3	1.7	0	8	0	0	3	0	0	6.88815	0	0	2.98467	0	low
423	322	PC-5p-159094_9	TTGCTTTATGCTTTCGGTGCC	21	Sc0002510	+	253285	253482	attgttcaggattgttagtatattattatatgttagtgtttagctttaataattagtgtccccTTGCTTTATGCTTTCGGTGCCtctttgaagacaacataggatgccaattgaggcaccgaaagcatgaagcaaggggacattaattattaaagctaaacactaacatataataatatactaacaaggatgaactta	5'	New	gp4	...(((((...(((((((((((((((((((((((((((((((((((((((((((((((((((((((((((((((((((((((((((.(((.................)))..)))))))))))))))))))))))))))))))))))))))))))))))))))))))))))))))))))))))))))...)))))...	192	32.8	-131.4	2	4	5	3	0	0	0	4.11899	4.30509	3.2193	0	0	0	low
424	323	PC-5p-37861_50	AGGCAAAACCTCCATTGGCAGC	22	Sc0001417	+	320157	320286	agctgtagatgaatattactAGGCAAAACCTCCATTGGCAGCaggcagccatttaggacacatttgcgaaatgtgttgctcaagtgtgcccactgccaaaggagatttgcctcgcaattcttctacaatt	5'	New	gp4	...((((((.((((......(((((((..((((.(((((((..((((..((((((((((((((((...))))))))).)).)))))))))..))))))).)))).)))))))....)))).))))))...	124	44.6	-52.7	0.9	18	29	3	0	0	0	18.5354	24.9695	3.2193	0	0	0	middle
425	324	PC-3p-80963_22	AATCTCTTCCCAAATTCCTCAACC	24	Sc0001158	+	290850	291004	tttttggttggagaatttgggaagggatttggaaatagaaagggaaaaggtgtgtgaaactaggtaaaatatagataaattttatttacattttacctactttttccttttcctgttcttAATCTCTTCCCAAATTCCTCAACCaaacacaacgt	3'	New	gp4	..((((((((..(((((((((((((((((..(((...((((((((((((((..........(((((((((.(((((((...))))))).)))))))))))))))))))))))...)))..)))))))))))))))))..))))))))........	145	32.3	-69.4	1.4	9	8	5	4	0	9	9.26772	6.88815	5.3655	5.18816	0	7.09447	low
426	325	PC-5p-90976_19	ATTGGTCCAGAGAAATTTCAGTGC	24	Sc0000267	-	544062	544187	tccagagaaatttcagtccagagaaaATTGGTCCAGAGAAATTTCAGTGCagagaaaattggtcagagaaattctggctcagagaaatttctctggaccaaatttctctggatgactttctctact	5'	New	gp4	...(((((((..(((.((((((((((.((((((((((((((((((..((...........((((((((...))))))))))..)))))))))))))))))).))))))))))))).)))))))...	120	38.9	-60.9	1.2	12	7	0	0	0	0	12.357	6.02713	0	0	0	0	middle
427	326	PC-3p-128561_12	CCTTTCCAAATCTCTCCCCAT	21	Sc0002960	-	258809	258974	ttatgatgtgtttggttggggaatttggagagggatttggaaaggaaaagggaaaaggtgtgtgaaactaggtgaaatataggcatgttttattctcatttcacctaccttttccatttcCCTTTCCAAATCCCTCCCCATatgctccaaccaaacacagcattaa	3'	New	gp4	..(((.(((((((((((((((....(((.((((((((((((((((.(((.(((((((((..((((((..(((((((((((....)))))))).)))..))))))..))))))))).))).)))))))))))))))).)))....))))))))))))))).)))...	161	39.8	-89.2	1.3	6.5	0	0	0	3	9	6.69336	0	0	0	2.98467	7.09447	low
428	327	PC-3p-7886_227	TTGAGCCATTATGACCACAAA	21	xfSc0000001	+	1118028	1118207	tctattattatatggtaaatgtttgagggccacaatttttgtggccacaatggctcaaaactgtcaaaacgacgtcgtttttggtgcaaaacatgtcaaaacgacatcgttttgacagttTTGAGCCATTATGACCACAAAaattgtaaccctctaacattgttattattatatagaata	3'	New	gp4	(((((....(((.....((((((.(((((..(((((((((((((.((.((((((((((((((((((((((((.((((((((..(((.....)))...)))))))).)))))))))))))))))))))))).)).)))))))))))))..))))).)))))).....)))...)))))...	177	33.9	-88.7	1.5	52	59	51	17	28	27	53.5468	50.8001	54.7281	22.0497	27.8569	21.2834	middle
429	328	PC-5p-74814_24	CATTGTGTGGTTGAGATTTTT	21	Sc0000321	-	865724	865902	caccaaggatcctctagagtgaaattttcctaaagtttcctagagtgctaCATTGTGTGGTTGAGATTTTCtggcaagtcacatcagaaaaattgatgtgacttgtcagtaaatctcaaccacacaatgtagcactctaggaaactttagagaaaaattactctagaggatccttgctc	5'	New	gp4	...(((((((((((((((((((..(((((((((((((((((((((((((((((((((((((((((((((.(((((((((((((((((.....))))))))))))))))).)))))))))))))))))))))))))))))))))))))))).))))).)))))))))))))))))))...	173	38.5	-135	2	3	3	3.5	0	3	2.5	3.08924	2.58306	3.75585	0	2.98467	1.97069	low
430	329	PC-3p-108049_15	ATGGGCTTCAGTTCATTGTGA	21	Sc0003326	+	83422	83486	ttcatcatcattgcaaatgagggccatttcttctctggaaATGGGCTTCAGTTCATTGTGAttta	3'	New	gp4	...((((.((.((.((.(((((.((((((((.....)))))))).))))).)))).))))))...	59	38.5	-22.2	0.9	0	0	4.5	0	0	3	0	0	4.82895	0	0	2.36482	low
431	330	PC-5p-38741_49	TTTATCACTGCCTCTCTTACA	21	Sc0000120	-	1082104	1082189	atccaTTTATCACTGCCTCTCTTACAaggcagtggggcccattagcattccccacttccttgtgagagaggcagtgagaaatgcag	5'	New	gp4	...(((((.((((((((((((((((((((.(((((((............))))))).)))))))))))))))))))).)))))...	80	50	-54.6	1.3	4	7	6	8	6	22	4.11899	6.02713	6.4386	10.3763	5.96933	17.342	middle
432	331	PC-3p-113029_14	AATTCCCTTTTTAAATCCCTCTTC	24	xfSc0000270	-	2924	3060	cgctgtgtttgattggaggatttgaggagggatttagaaagggaaaggaaaaaagtgtgtgaaatttggatcacatttcacctactatttAATTCCCTTTTTAAATCCCTCTTCaaatcctttaaccaaacacaaaa	3'	New	gp4	...((((((((.((..(((((((((((((((((((((((((((((..(((...(((..(((((((.((...)).)))))))..))).)))..)))))))))))))))))))))))))))))..)).))))))))...	131	35	-69.2	1.4	8	3	3	0	0	0	8.23798	2.58306	3.2193	0	0	0	low
433	332	PC-3p-150146_10	AGTTTTAAGCCATTGTGACTAGAA	24	Sc0002358	-	218571	218693	gaaaatgtttgagggtcacaatttttgtggtcataatggctcaaagctgttaaaacgacgtcgtttcattttgacAGTTTTAAGCCATTGTGACTAGAAaaattgtgactctcaaacattgtt	3'	New	gp4	...(((((((((((((((((((((((.((((((((((((((.(((((((((((((.((.......)).))))))))))))).)))))))))))))).)))))))))))))))))))))))...	117	35	-71.2	1.7	5	5	0	0	0	0	5.14874	4.30509	0	0	0	0	low
434	333	PC-3p-236258_5	AATCCCTCCCTAAATCCTCTAACC	24	Sc0000011	+	1227725	1227876	tgtttggttgagagatttggggagggatttggaaagggaaagggaaaagttgtgtgaaactatgtgaaatatagacgtaatatattcacatttcacctaccttttccatttccttttccaAATCCCTCCCTAAATCCTCTAACCaaacacag	3'	New	gp4	((((((((((((.((((((((((((((((((((((((((((.(((((((....(((((...(((((((.((((.......))))))))))))))))....))))))).))))))))))))))))))))))))))))))).)))))))))...	149	38.2	-85.6	1.5	13	0	0	0	0	0	13.3867	0	0	0	0	0	middle
435	334	PC-5p-81366_22	TAGGAGATTTGTGGAGGGATT	21	Sc0005839	-	207	357	tgtgtttgatTAGGAGATTTGAGGAGGGATTtaaaaaaaaaaaagggaaaagatgtgtgaaactatgtaaaatgtaggtatattttttttacatttcacctacctttttcatttccctttccaaatccctcctcaaatctctcaaccaaac	5'	New	gp4	...(((((.((..(((((((((((((((((((.........(((((((((.((...(((((...((((((((..............))))))))))))).........)).)))))))))..)))))))))))))))))))..)).)))))	148	31.8	-53	1.1	0	0	0	5	4	13	0	0	0	6.4852	3.97955	10.2476	middle
436	335	PC-3p-25930_73	AATTTGAGCCATTTGAGCCACAGA	24	Sc0000687	+	705370	705515	atagagggccctaatttatgtggctcaaatggctcgaatttgccaaaacgatgtcgttttgagtacaaaacaacatcaaaattgccaaaacgacgtcgttttggcaAATTTGAGCCATTTGAGCCACAGAaattagggccctcaaa	3'	New	gp4	...((((((((((((((.(((((((((((((((((((((((((((((((((((((((((((.(((.................)))))))))))))))))))))))))))))))))))))))))))))).))))))))))))))...	140	41.1	-104.2	1.7	17.5	10	2.5	2	2.5	2	18.0206	8.61018	2.68275	2.59408	2.48722	1.57655	middle
437	336	PC-5p-95711_18	GTAGAGGGCTCAAATTCTGTGGCT	24	xfSc0015690	-	1061	1218	ttttatgagcaatgGTAGAGGGCTCAAATTCTGTGGCTcaaatgtggctcaaatggccaaaacgacgtcattttgagtacaaaacaacatcaaaatggccaaaacgacgtcgttttggccatttaagccatatttgagccacagaattagggccccta	5'	New	gp4	...............(((.((((((.(((((((((((((((((((((((.(((((((((((((((((((.(((((.((...................))))))).))))))))))))))))))).))))))))))))))))))))))).)))))))))	143	42.4	-91.8	1.4	14	12	6	0	0	6	14.4165	10.3322	6.4386	0	0	4.72964	middle
438	337	PC-3p-184935_7	AGCCATTTGAGTCACAGAATTTGT	24	Sc0000275	+	641	807	cggcaatgattggtggctacaaattttgtgactcaaatgacccgaaaatgccaaaacgacgtcgttttgggtacaaaacaattctgaaaatgtcaaaacgacgttgttttgacattttcgAGCCATTTGAGTCACAGAATTTGTtgccacgaaacatttgagccaaa	3'	New	gp4	.(((((((.((.(((((.(((((((((((((((((((((...((((((((.(((((((((((((((((((......................))))))))))))))))))).))))))))...))))))))))))))))))))).))))).)).))))...)))...	163	39.5	-83.2	1.3	5	1.5	0	0	0	0	5.14874	1.29153	0	0	0	0	low
439	338	PC-3p-98932_17	AATCTCTTTTCAAATCCTTCAACC	24	Sc0000153	+	237987	238135	ttggttaggagatttgtaaagtaatttggaaagaaaatagaaaaaaaaaaaatgtaaaatgaagtaaaatgtaaatatattttatttgtatttctcctattttttttatttctctttccaAATCTCTTTTCAAATCCTTCAACCaaaca	3'	New	gp4	(((((((((.((((((.((((..(((((((((((.....((((.((((((((((..((((((((((((((((....))))))))))).)))))....)))))))))).)))))))))))))))..)))).))))))))).))))))...	146	21.5	-44.6	1.4	7	0	0	0	5	13	7.20823	0	0	0	4.97444	10.2476	middle
440	339	PC-5p-202305_7	TGCAGATGAGAGAAAGGGAAAT	22	Sc0000842	+	180476	180631	tttggggcactacgTGCAGATGAGAGAAAGGGAAATaaattaccaacacatcatgagggctgcaaatgtgtctgtgttggtggggtgcacatgaaagattgtgggggtcatgtgttggtaattcttttcctattctctcacctgcatgtaattccc	5'	New	gp4	...((((...(((((((((.((((((((..(((((..(((((((((((((...(((...(..(((.....(((((((.........))))).))....)))..)...))))))))))))))))..)))))..)))))))).)))))))))..))))	153	44.9	-66.8	1	7	3	0	0	0	0	7.20823	2.58306	0	0	0	0	low
441	340	PC-3p-98763_17	TCCCACCTCGAATCCTTGATT	21	Sc0003828	-	166463	166610	tttggatctaggatttgagaagggatttgtagagggaaaggaaaaggaaagggaaatgtgataaacatttagcttgtatttcattcaattttccctttctatttcctttccctctgcaaaTCCCACCTCGAATCCTTGATTcaaacat	3'	New	gp4	((((((((.((((((((((..(((((((((((((((((((((((..((((((((((.((((...(((.......)))...)))).....))))))))))..)))))))))))))))))))))))..)))))))))).))))))))...	145	36.5	-83.6	1.5	4	3	0	1.5	4.5	14	4.11899	2.58306	0	1.94556	4.477	11.0358	middle
442	341	PC-5p-200790_7	TTGCAATGGTCAAGATTCACC	21	Sc0000043	-	967918	968064	ctctctTTGCAATGGTCAAGATTCACCctaagagaatctaatggcctagatcattccaaaaatattattttttaatttttattttttttaataaagtgatctgaaccgttaaattttttttagagtaaatcttgactattacaagga	5'	New	gp4	...((((((.(((((((((((((.((.(((((((((..((((((..((((((((...(((((......)))))....((((((......))))))))))))))..))))))...))))))))).)).))))))))))))).))))))	144	26.5	-45.9	1.2	0	6	4	0	0	0	0	5.16611	4.2924	0	0	0	low
443	342	PC-3p-154481_10	AATCCCTCCTTAAATCCACCAACC	24	xfSc0000879	-	52484	52634	tgttttgttgggggatttggagagggatttggaaagaaaaatgaaaaaagtgtgtgaaactatgtgaaatgcaaatatattttattcacatttcacctaacttttcatttttcccttctaAATCCCTCCTTAAATCCCCCAACCaaacgca	3'	New	gp4	.((((.(((((((((((((..(((((((((((((.((((((((((((.(((.......)))..((((((((..((((.....))))..)))))))).....))))))))))))..)))))))))))))..))))))))))))).))))...	147	34.4	-69.2	1.3	6	4	0	0	0	0	6.17848	3.44407	0	0	0	0	low
444	343	PC-3p-105230_16	AATCTCTCTTCAAATCTCCCAACC	24	Sc0002375	+	247763	247914	tgtttggttggggaatttgatcagggattgggaaagggaaaagaaaaagttaggtgaaatgtgaataaaatatgcttacatttcacctagtttcacacaccttttccctttccctttccaAATCTCTCTTCAAATCTCCCAACCaaacacag	3'	New	gp4	((((((((((((..((((((..(((((((((((((((((((((...((..((((((((((((((...........))))))))))))))..)).......))))))))))))))......)))))))..))))))..))))))))))))...	149	38.2	-74.6	1.3	6	3	0	0	0	7	6.17848	2.58306	0	0	0	5.51792	low
445	344	PC-3p-62364_30	ACCCATACAACACACCACTTT	21	Sc0002024	+	367377	367544	gagcaaggatcctctaaagtttttttttcctaaagtttcctagagtggtgttttgtatggttgagatttaatgacaagtcacatcaattttttagcattaaatctcACCCATACAACACACCACTTTaggaaactttaggaaaaaaaaactctagaggatccttggtg	3'	New	gp4	...(((((((((((((.((((((((((((((((((((((((((((((((((.((((((((.((((((((((((..(((............)))..)))))))))))).)))))))).)))))))))))))))))))))))))))))))))).)))))))))))))...	162	34.5	-103.6	1.8	7	4	10	0	9	0	7.20823	3.44407	10.731	0	8.954	0	middle
446	11	PC-3p-32634_59	ATGCTCTTCTGAACTGTGCAGTGA	24	xpSc0053543	-	162317	162493	atttaattatttgttattaaatatgaacgtttcactgcacattttaggatagcatatcaaaaaagcaaatgtcaaagagtaccaaagttgatagcaggcactgctaattgcttttttgacATGCTCTTCTGAATTGTGCAGTGAaatgttaatatttttagtaacaaataattattt	3'	New	gp4	...(((((((((((((((((((((.((((((((((((((((.(((((((.(((((.((((((((((((...((((............))))((((((...)))))).)))))))))))).))))).))))))).)))))))))))))))).))))..)))))))))))))))))...	171	27.7	-75.5	1.5	11.5	14	6.5	5	6.5	8.5	11.8421	12.0543	6.97515	6.4852	6.46677	6.70033	middle
447	345	PC-3p-174218_8	AATTTCTCCCTAAATCTCCCAACC	24	Sc0000523	+	785620	785771	tgtctggttgagggatttaaagaggaatttggaaagggaaatggaaaatttagataaaatgtaaataaaatatacttatatttcacatactttcacacacatttttcttttcttttttcaAATTTCTCCCTAAATCTCCCAACCaaatagaa	3'	New	gp4	(((.((((((.((((((((..((((((((((((((..((((.(((((((...........(((....((((((....))))))....)))..........))))))).))))..))))))))))))))..)))))))).)))))).)))...	149	27.6	-45.5	1.1	4	0	4	0	0	0	4.11899	0	4.2924	0	0	0	low
448	346	PC-3p-98545_17	ATGGATCCTCACACTCATACGAGA	24	Sc0003683	-	51822	51924	tcaaaaaattttatcaaatattttacatgagtgtgatattcacgtgaaactcatatgatGTGGATCCTCACACTCATACGAGAcatttaataaaaattttaat	3'	New	gp4	...((((.((((((.((((.((((..((((((((((.((((((((............))))))))..))))))))))..)))).)))).)))))).))))...	97	26.2	-26.5	1	15	12	0	3	0	3	15.4462	10.3322	0	3.89112	0	2.36482	middle
449	347	PC-3p-98718_17	AGCATCAGCTAAAAAGTCCGTGAC	24	xfSc0007611	-	695	928	tcagcttggctattcttgttatagccaacgacgtatactgggtagccccacttcttctccacgatcactgacttattaactggtgcaaatagattcgacaacagtgtccctaaatctattAGCATCAGCTAATAAGTCCGTGACtatggagaaaaagtggggggccacccagtatacatccttggctataacaagaatagccaagctgagaggctcagttttatttcctctgca	3'	New	gp4	((((((((((((((((((((((((((((.((.(((((((((((.(((((((((.(((((((...((((.(((((((((.(((((((.((((((((.((((....))))....)))))))).))))))).))))))))).))))...))))))).))))..))))).))))))))))).)).))))))))))))))))))))))))))))((((.............))))....	209	44	-135.1	1.3	6	7	1.5	0	0	1.5	6.17848	6.02713	1.60965	0	0	1.18241	low
450	348	PC-5p-161450_9	CCTTCAAAGACTCTGACTGGT	21	xfSc0000075	-	335604	335719	atttcccacaaaagcaccCCTTCAAAGACTCTGACTGGTaagagcttagcgctgtagagtaagtgaatagactcttaccggttagagtctatgaaggggtgcttttgttgggatgt	5'	New	gp4	...(((((((((((((((((((((.(((((((((((((((((((((...((((........))))...)).))))))))))))))))))).))))))))))))))))).))))...	110	44.8	-78.3	1.5	12	0	3	3	3	6	12.357	0	3.2193	3.89112	2.98467	4.72964	middle
451	349	PC-3p-272155_4	AATGGTTGTGAGTGATTTGAGATA	24	Sc0005860	+	17176	17333	gctcaaggatttcctatctccaaatatccgttccaaatcactcacaatcattagatatgtcttaagattttcaaatcttgagattctcatatgatccAATGGTTGTGAGTGATTTGAGATAgaggacataaatatttggggacaggatatccttgttc	3'	New	gp4	...(((((((.((((.(((((((((((((..(((((((((((((((((((((.(((..(((((((((((....))))))))))).........))).))))))))))))))))))).))....)))......)))))))))).)))).)))))))...	152	35.4	-71.1	1.3	6	2	0	0	0	0	6.17848	1.72204	0	0	0	0	low
452	350	PC-3p-106277_16	AGACATATGTGCCTCATTCTGTGT	24	Sc0000007	-	877646	877765	aatacacaaccaccaaacataaaatgggacacatacctctcacatgaggtgggtctcacatataagccccatcctatgtgAGACATATGTGCCTCATTCTGTGTttggtgattgtgtttc	3'	New	gp4	...((((((.(((((((((((.((((((.((((((..((((((((..((((((.((........)).))))))..))))))))..)))))).)))))).))))))))))).))))))...	114	42.5	-60.7	1.2	23	6	5	0	0	0	23.6842	5.16611	5.3655	0	0	0	middle
453	351	PC-3p-64436_28	AATCTCTCCTCAAATTTCCCAACC	24	Sc0001256	+	223788	223939	tgtttggttgaagaatttggggagggatttagaaaaggaaacggaaaaagtgtgcaaaactatgtgaaatataggtatgctttattcatatttcacttacctttttcatttctctttccaAATCTCTCCTCAAATTTCCCAACCaaacacag	3'	New	gp4	((((((((((..((((((((((((((((((.((((..((((..(((((((.((.....))...(((((((((..(((.....)))..)))))))))....))))))).))))..)))).))))))))))))))))))..))))))))))...	149	34.2	-63.6	1.2	12	19	5	0	0	9	12.357	16.3593	5.3655	0	0	7.09447	middle
454	352	PC-3p-133403_12	GAATGGTGTAGATCAGTAAGGGGG	24	xfSc0051266	+	327	506	ttaagagcaatgatagagaccccttttgtagaggattcccacaatcccctttgtgatccataccattcatgatgtggaccccacacatatatgagtgggctccacacatcatGAATGGTGTAGATCAGTAAGGGGGctgtgggggtcctccacaaagggggtctgactcatttttctatt	3'	New	gp4	...(((..(((((...(((((((((((((.(((((..((((((..((((((..(((((.(((((((((((((((((((.(((((.((....)).))))).))))))..))))))))))))).)))))..))))))..))))))..))))).)))))))))))))...)))))..)))...	174	46.7	-111.4	1.3	4	0	0	0	0	2	4.11899	0	0	0	0	1.57655	low
455	353	PC-3p-209134_6	TTTTGAGCCATTGTAGTCACAAA	23	Sc0004481	+	97184	97370	ttgtattaattttaaagaaaatgtttgagggtcataatttttgtggccacaatggctcaaaattaccaaaacgacgtcgttttgggtgcaaaacatgccaaaacgacaccgttttgacagTTTTGAGCCATTGTAGTCACAAAaattgtagctctcaagcattgttgtaattttaaatctatactat	3'	New	gp4	..((((..((((.(((...((((((((((((..((((((((((((((.((((((((((((((((..(((((((..(((((((((((((.....))).))))))))))..)))))))..)))))))))))))))).))))))))))))))..)))))))))))).......))).))))..))))...	182	33.7	-87	1.4	3	7	0	0	0	0	3.08924	6.02713	0	0	0	0	low
456	354	PC-3p-85269_20	CTATATTCCGTCCCATACCAGG	22	Sc0004287	+	68869	69034	gctattctagtatgggatgaaatataaaaattgatctcacacattccattagaccaaagtcttttggcatagtggtcaaaccaaaagacctggatttgatgaaatgtgtgcgatcaattcCTATATTCCGTCCCATACGAGGatagttcaactcatgtctcatacc	3'	New	gp4	((((((((.((((((((((.((((((..((((((((.((((((((.((((((((((..(((((((((.............))))))))).))).))))))).)))))))).))))))))..)))))).)))))))))).))))))))...................	147	38	-71	1.1	19	17	0	5	7	3	19.5652	14.6373	0	6.4852	6.96422	2.36482	middle
457	355	PC-5p-64118_29	TAGTGATGTGTTAAGAAGATG	21	Sc0002476	+	168259	168338	taaatcTAGTGATGTGTTAAGAAGATGattggttgataattattaatcaatcatcttcttttaacacatcactggatcca	5'	New	gp4	...((((((((((((((((((((((((((((((((((....))))))))))))))))))..))))))))))))))))...	74	28.8	-45.4	2	10	3	11	0	5	0	10.2975	2.58306	11.8041	0	4.97444	0	middle
458	356	PC-3p-176848_8	AACTCCTTCTCAAATCCCCCAACC	24	xfSc0000056	-	127919	128064	gttgggggatttgggaagggatttggaaagggaaaaggaaaaggtaaaggtatgtaaaatataaataaaatatacctacatttcacatagttttacacacttttttcctttcattttccaAATTCCTTCTCAAATCCCCCAACCaa	3'	New	gp4	(((((((((((((((((((((((((((((..((((.(((((((((..((((((((..............))))))))............(.....)..))))))))).))))..)))))))))))))))))))))))))))))...	143	33.6	-66.5	1.4	8	4	0	0	0	4	8.23798	3.44407	0	0	0	3.1531	low
459	357	PC-3p-199158_7	ACGGACGGATAGCGGATTGGAGGT	24	xfSc0001740	+	36909	37016	ccaaaccgccaatccgctcaatccacatccgtcggattggcggacggatgcggattgattttctccaatccgccaatctgACGGACGGATAGCGGATTGGAGGTtcca	3'	New	gp4	...((((.((((((((((..((((...(((((((((((((((((.(((...(((......))))))..))))))))))))))))).)))))))))))))).))))...	102	55.6	-62.2	1	3	4	0	0	0	0	3.08924	3.44407	0	0	0	0	low
460	358	PC-3p-301968_4	ATTTGAGTCATTTGAGTCACAAAA	24	Sc0000350	+	206008	206200	ttgatttttttataaagaaaatgtttggtaactcaaaattttgtagttcaaatggctcaaatctgtcaaaacgacgtcgttttacactcatttacactcaaaacgacgtcgttttgagtgATTTGAGTCATTTGAGTCACAAAAttttgagttacctaacattgttgtttttataatatatgaaagttgatca	3'	New	gp4	(..(((((((((((((((.((((((.((((((((((((((((((..(((((((((((((((((..((((((((((((((((((................))))))))))))))))))..)))))))))))))))))..)))))))))))))))))).))))))....))))))))).....))))))..)...	190	29	-88.3	1.6	3	4	0	3	0	0	3.08924	3.44407	0	3.89112	0	0	low
461	359	PC-3p-120498_13	AATCACTTCCTAAATCCCCCAACC	24	xfSc0002789	-	20912	21063	tgtttggttgggggatttagagagggatttggaaagggaaatagaaaaggtaggtgaaatgtgaataaaacatgtttatatttcacatagtttcacacaccttttccctttccctttccaAATCACTTCCTAAATCCCACAACCaaacacaa	3'	New	gp4	((((((((((.(((((((((.((((((((((((((((((((..((((((((..((((((((((((((.....))))))))))))))...(.....)..))))))))..)))))))))))))))).))))))))))))).))))))))))...	149	36.8	-82.3	1.5	6	4	3	0	0	0	6.17848	3.44407	3.2193	0	0	0	low
462	360	PC-3p-152854_10	AATCTCTTCTCAAATCTCTCAACC	24	Sc0000418	+	636478	636621	tgagggatttaaggagggatttggaaaagaaaaaagaaaagggaaaaaggtgtgtgaaactagatgaaatatagacatattttattcacatttcacttaccttttttattttccttttcaAATCTCTTCTCAAATCTCTCAACC	3'	New	gp4	((((((((((.((((((((((((((((.(((((.((((((((......(..((((((......(((((((((....)))))))))))))))..).....)))))))).))))).)))))))))))))))).))))))))))...	141	30.6	-54.9	1.2	10	4	0	0	0	0	10.2975	3.44407	0	0	0	0	middle
463	361	PC-5p-95995_18	AAGAATGTATACGTCAGTACGATA	24	Sc0000637	-	703765	703940	acatacataaaattaagcttcaaaaaagtaatAAGAATGTATACGTCAGTACGATAaggttcagtccatttttgacaaaaataatggaaggtatttacaaatgagggtaccgggtgtgccccattgtgttgatgtgtacactcttgatactttttttgtagtttaattttgtgtat	5'	New	gp4	..(((((((((((((((((.((((((((((..((((.(((((((((((..(((((..((..((.((((((.((......)).)))))).((((..(........)..))))...))..))..)))))..))))))))))).))))..))).))))))).)))))))))))))))))	174	31.8	-63.6	1.1	17	7	4	0	0	4	17.5057	6.02713	4.2924	0	0	3.1531	middle
464	362	PC-3p-105755_16	CGTCGTTTTGGTCATTTGAGT	21	Sc0003810	-	154130	154313	ccctttcaaaagagcaatggtagagggcccaaattctgtggctcaaatgtggctcaaatggccaaaacgacgtcgttttgagtacaaaacaacatcaaaatggccaaaacaaCGTCGTTTTGGTCATTTGAGCcacatttgagccacagaattagggccctcaaacatttttcctttcaaaaat	3'	New	gp4	...(((.(((.((..((((...((((((((.((((((((((((((((((((((((((((((((((((((((((.((((((.((...................)))))))).)))))))))))))))))))))))))))))))))))))))))).))))))))...))))..)).))).)))...	178	41.8	-106.5	1.4	3	4	0	5	0	4	3.08924	3.44407	0	6.4852	0	3.1531	low
465	363	PC-3p-62093_30	TTTCCAAATCCCTCCCCATT	20	Sc0004674	-	60576	60732	ggtgtgtttggttagataatttgatgagagatttggaaagggaaagggaatcgttaggtgaaatgtgaataaaatatacctacatttcacctagtttcacacacattttctctttcccTTTCCAAATCCCTCCCCATAtcctccaaccaaacacagc	3'	New	gp4	..(((((((((((.((..((.((..(((.(((((((((((((((((((((..(((((((((((((((.............))))))))))))).........))...))))))))))))))))))))).)))..)).))..)).)))))))))))..	153	38.9	-69.5	1.1	15.5	1.5	7	5	6	5	15.9611	1.29153	7.5117	6.4852	5.96933	3.94137	middle
466	364	PC-3p-56313_33	TTTGACAGTTTTGGACCATT	20	Sc0001052	-	98930	99065	gtagagggccacaatttttatgactcaaatggctcaaaactgccaaaacgacgtcgttttgaacacaaaacatgtcaaaacgacgtcgtTTTGACAGTTTTGAACCATTtgagccacacaaattgtgactctcaaa	3'	New	gp4	...(((((.((((((((...((.(((((((((.(((((((((.(((((((((((((((((((.((.......))))))))))))))))))))).))))))))).))))))))).))...)))))))).)))))...	130	39.7	-72.4	1.3	3	4.5	2.5	3	3.5	0	3.08924	3.87458	2.68275	3.89112	3.48211	0	low
467	365	PC-3p-93228_18	ATTTTGAGTCATTTGAGTCACAGA	24	Sc0004221	+	46592	46737	atagagggccctaatttttgtggctcaaatggctcgaatttgtcaaaacgacgtcgttttgagtacaaaacaacatcaaaattaccaaaacgatgtcgttttggcaAATTTGAGTCATTTGAGTCACAGAaattagggccctcaaa	3'	New	gp4	...((((((((((((((((((((((((((((((((((((((((((((((((((((((((((.(((.................)))))))))))))))))))))))))))))))))))))))))))))))))))))))))))))...	140	38.4	-99.7	1.8	9	5	0	4	0	0	9.26772	4.30509	0	5.18816	0	0	low
468	366	PC-3p-32464_59	CAATCATGCCATATATACAAT	21	Sc0001550	+	281058	281141	atcttgtgagaatatattgtatatatggtatgattgtcctaatatacaCAATCATGCCATATATACAATatattcaaacaaatc	3'	New	gp4	...((((..((((((((((((((((((((((((((((..........))))))))))))))))))))))))))))..))))...	78	25	-40.7	1.9	5	14	18	9	8	5	5.14874	12.0543	19.3158	11.6734	7.95911	3.94137	middle
469	367	PC-5p-136228_11	AAAACCATCTGCACCGTTGGATC	23	Sc0001540	+	243026	243157	tacgtttcatgaaaactgtcatgaaaactgtcatgAAAACCATCTGCACCGTTGGATCatgagacatatacctgatctaacggtgcagatggttttcatgacagttttcatgaaaattcttcatgacaccta	5'	New	gp4	...((.(((((((.....(((((((((((((((((((((((((((((((((((((((((.............)))))))))))))))))))))))))))))))))))))))))......))))))).))...	126	37.9	-79.8	1.6	8.5	3	0	0	0	0	8.75285	2.58306	0	0	0	0	low
470	368	PC-3p-107687_15	AAATCTCTCCCCAAATCTTCCAAC	24	xfSc0002190	+	28194	28347	gtgtttggttgagggatttgaggagggatttgaaaagggaaatgaaaaaggtaggtgaaatatgaaaaaaatatacctacatttcacatagtttcacacaccttttccctttccctttctAAATCTCTCCCCAAATCTTCCAACcaaacacagc	3'	New	gp4	(((((((((((..(((((((.((((((((((..(((((((((...(((((((..(((((((.(((((..............)))))....)))))))..)))))))...)))))))))..)))))))))).)))))))..)))))))))))...	151	37.7	-72.2	1.2	13	8	0	0	0	9	13.3867	6.88815	0	0	0	7.09447	middle
471	369	PC-5p-101340_17	AGCTCATCTCTTCGTCGGATCTCT	24	Sc0000090	-	93926	94066	atatacaggggcaaAGCTCATCTCTTCGTTGGATCTCTacaatccatgtgagaggatttttctggcctcacaattggcgtcgtctgtgggaaatgtctgcaagagttcaacgaagagatgagcaaacatgttcttgtaagt	5'	New	gp4	...((((((..((..((((((((((((((((((.((((.....(((((((((.(((....)))...))))))..)))........(..((.....))..).)))))))))))))))))))))).....))..))))))...	135	44	-59.3	1	8	0	3	0	0	6	8.23798	0	3.2193	0	0	4.72964	low
472	370	PC-3p-126183_13	AATCCCTCTCTAAATTCTCCAACC	24	Sc0001213	+	7966	8115	tttttggttggaggatttgagaaggaatttgaaaagagaaaggaaaaaagcgtgtgaaattaggtgaaatatagacatgttttattcacatttcatatacctttttcattttccttttcaAATCCCTCTCTAAATTCTCCAACCaaacaa	3'	New	gp4	..((((((((((((((((((((.(((.(((((((((.(((((..((((((.(((((((((...(((((((((....)))))))))....)))))))))..))))))..))))))))))))))))).)))).))))))))))))))))...	145	30.7	-61	1.3	0	10	3	0	0	3	0	8.61018	3.2193	0	0	2.36482	low
473	371	PC-3p-135899_11	ATTTCTCTTTTCAAATTCTTTCCC	24	Sc0002395	-	104999	105163	ttaatgctgtatttggttgggggatttggggagggatatggaaagggaaagaaaatgtgtgtgaaattaggtgaaatataggtatgttttattcatatttcacctatctttttcATTTCTCTTTTCAAATTCTTTCCCaaatcctctaaccaaacacagtataag	3'	New	gp4	...(((((((.((((((((((((((((((((((((((.(((((((((((((((((............((((((((((((..(((.....)))..))))))))))))...))))).)))))))))))).)))))))))))))))))))))))))).)))))))...	159	33.3	-82.7	1.5	13	3	0	0	3	3	13.3867	2.58306	0	0	2.98467	2.36482	middle
474	372	PC-3p-112681_15	AATCCCTTCCGAAATATCCCAACC	24	Sc0001212	-	446442	446593	tgtttggttgggggatttgaagagagatttggaaaggataagggaaaaagtgtgtgaaactaagtgaaatttagacatgttttattcacatttcacctaccttttctatttctctttcaaAATCCCTTCCGAAATCTCCCAACCaaacacaa	3'	New	gp4	((((((((((((((((((((((.((..(((((((..((....((((((.((..((((((...((((((((........))))))))....))))))..)).))))))...))..))))))).)).))))..))))))))))))))))))...	149	35.5	-56.3	1	6	12	0	0	0	6	6.17848	10.3322	0	0	0	4.72964	middle
475	373	PC-3p-69601_26	AGGATTTGATGAGAGAAATGGAAA	24	Sc0000396	+	911172	911355	taatcaaacaagcagattgcatttcctttttcttttccatttctctcatccaatcctcaaaccaaacacaatctaaagtggtaggtaataaaatggtagacaaatgttgtgtttggtaggAGGATTTGATGAGAGAAATGGAAAgagaaaatgaaatccaatctcattttttgtttggttataa	3'	New	gp4	((((((((((((.((((((.(((((.((((..((((((((((((((((((.(((((((..(((((((((((((((..((..((.....))..))..))))......)))))))))))..))))))).))))))))))))))))))..)))).))))).)))))).....))))))))))))...	181	32.1	-80.8	1.4	7	12	4	0	0	3	7.20823	10.3322	4.2924	0	0	2.36482	middle
476	374	PC-5p-227649_6	ACCGTTGGAACATCTGGTACCAGA	24	xpSc0053449	-	912	1101	ccggtcgaccacccagttgtcccgggacagatttggtaaaaggtgaACCGTTGGAGCATCTGGTACCAGAtttggtgaaatgagttcatcaaatctgagtaaaaaatgactcatttcaccaaatctggtaccagatgctttaacggttcacctttcaccaaatctgtcccgaaacaaccgggtggtcgac	5'	New	gp4	...(((((((((((.(((((..(((((((((((((((.((((((((((((((..(((((((((((((((((((((((((((((((.(((................))))))))))))))))))))))))))))))))))..)))))))))))))).)))))))))))))))..))))).)))))))))))	187	46.8	-143.7	1.6	6	4	0	0	0	0	6.17848	3.44407	0	0	0	0	low
477	375	PC-3p-154737_10	AACGGTGGAGAAACTTTCATGATC	24	Sc0002802	-	179036	179202	aaagaataatgttaggaatcatgaaaaaaatatcatgaaatgcttcatgaggatttttcatcctttgatttgtgtgtggtgttttcttgtatgtgtaacctAACGGTGGAGAATCTTTCATGATCattttcatgaaatttttttcatgatgtatagcattactcgaa	3'	New	gp4	...((.((((((((...((((((((((((((.((((((((....((((((((((((((((((.((.....(..(((..(.......)..)))..)......)).))))))))))).)))))))....)))))))).))))))))))))))...)))))))).))...	161	29.9	-56	1.1	4	3	3	0	0	0	4.11899	2.58306	3.2193	0	0	0	low
478	376	PC-5p-72913_25	TCGCAGGAAAGATGGCACCGGA	22	xfSc0003501	-	17110	17258	attagctagaaagagagtgataaacaagttgagggagttttgTCGCAGGAAAGATGGCACCGGAtttgctctatgccaaaattaatccggtactctttcctgcgaccagacaaccatcaacttctcttccgcttacattctgtgcttca	5'	New	gp4	...((((((((...(((((......(((((((((..((((.(((((((((((((..(.((((((((.((.....)).......)))))))).)))))))))))))).))))..)).)))))))......)))))...))))).)))...	143	43.6	-57.8	0.9	4	17.5	10.5	4.5	0	3	4.11899	15.0678	11.2676	5.83668	0	2.36482	middle
479	377	PC-5p-228499_6	AGTTGTCCCATCTGTACTGGTTAG	24	Sc0003032	+	87488	87644	gcatgtgttggaatgtgtctcatattgcctgaAGTTGTCCCATCTGTACTGGTTAGaaggctctagtttccctctccttaatacttggagactagagccttataaccagtacagatggagcaacttcaggcaatgtgggacacattccaacacaccc	5'	New	gp4	...((((((((((((((((((((((((((((((((((..((((((((((((((((.(((((((((((((((...............))))))))))))))).))))))))))))))))..))))))))))))))))))))))))))))))))))...	151	45.9	-118.5	1.6	0	3	0	0	3	6	0	2.58306	0	0	2.98467	4.72964	low
480	378	PC-5p-75060_24	AGAAATTTCGCCCCGACTCAA	21	Sc0000007	-	613200	613312	AGAAATTTCGTCCCGACTCAAagaaattttaattttcacagaaaaatttctctgatttcacagatcataccagagaaacttcaaaatttctttgagtaggggccgaaattgta	5'	New	gp4	...(((((((((((.(((((((((((((((..(((((...))))).((((((((................))))))))....))))))))))))))).))))).))))))...	107	32.7	-38.4	1	0	0	0	3	7	14	0	0	0	3.89112	6.96422	11.0358	middle
481	379	PC-5p-66989_27	TGATCCACACCACTCATGATGT	22	xfSc0000456	+	74778	74926	gaaaatgagtgagaccttctttatggatgaccctcacaacctccaaagTGATCCACACCACTCATGATGTgtggggcccacattataagtagtgtgggtcactttgggagttgtaggggtcctccaaaaatgaggtctttattattgtt	5'	New	gp4	...(((((..(((((((..(((.((((.(((((..(((((..((((((((((((((((.(((.((((((((.......)))))))).))).))))))))))))))))..)))))..))))).)))).)))..)))))))..)))))...	143	44.3	-81	1.2	9	20	11	0	0	0	9.26772	17.2204	11.8041	0	0	0	middle
482	380	PC-3p-88000_20	AAATGCCTCTCCAAATCCTCCAAC	24	xfSc0000405	-	72745	72901	gctgtgtttggttgagggatttgagaagggatttggaagaaatggaaaaggtaggtgaaatgtgaatgaaacatacctatatttcacctaatttcacacaccttttccctttccttttccAAATTCCTCTCCAAATCCTCCAACcaagcacagcgta	3'	New	gp4	((((((((((((((..((((((((((.(((((((((((((((.(((((((((..((((((((((((................)))))...)))))))..))))))))).))))...)))))))))))))).)))))))..))))))))))))))...	154	40.1	-81.6	1.3	7	7	0	0	3	6	7.20823	6.02713	0	0	2.98467	4.72964	low
483	381	PC-3p-125128_13	AATCCCTCCTCAAATTCCCTAACC	24	Sc0000014	-	940246	940397	tgtttggttaaaggatttaggaagggatttgaaaaggaaaaaagaaaatatacataaaatgagaataaaatatacttatatttcacctaatttcacatacattttcccttttcattgttaAATCCCTCCTCAAATTCCCTAACCaaacacag	3'	New	gp4	((((((((((..((((((((((.(((((((((....(((((..((((((.((....((((.((....((((((....))))))...)).))))....)).))))))..)))))....))))))))))))).))))))..))))))))))...	149	28.3	-42.3	1	6	4	0	3	0	0	6.17848	3.44407	0	3.89112	0	0	low
484	382	PC-3p-174068_8	CAATCCGAATAAAGTCCCCAAA	22	Sc0001572	-	193347	193484	tcaatttggggctttattcggattgaaccttgacgttttgaccattagtatactcttaaaccaatgcccggtaagagcctgagtatacactgatggtcaaaacgctagggctCAATCCAAATAAAGTCCCCAAAtcca	3'	New	gp4	...(((((((((((((((.(((((((.((((..((((((((((((((((((((((....(((.......)))........))))))..))))))))))))))))..)))).))))))).))))))).))))))))...	132	42	-66.4	1.1	0	0	0	7	5	4	0	0	0	9.07927	4.97444	3.1531	low
485	383	PC-3p-54493_34	ATTTTCTCACTTCCTTGTCCAACC	24	xfSc0000332	-	6970	7113	ccacgtgttagttggacaagaaattgagaaaataattacaacatgtctgttattactacaatagtgaatacttttaagattacaatacgtggatgacccatgtttgtaataATTTTCTCACTTTCTTGTCCAACCaatacgccc	3'	New	gp4	...((((((.(((((((((((((.(((((((((.(((((((((((...(((((..((((.....(((((.((....))))).))....))))))))).)))).))))))).))))))))).))))))))))))).))))))...	138	33.3	-52.4	1.1	12	22	3	0	0	0	12.357	18.9424	3.2193	0	0	0	middle
486	384	PC-3p-116144_14	TTCAAGGAAGCTGTGGGAAGT	21	Sc0004056	+	135964	136091	ttgctaagtcctgtcatgtttttccacagctttcttgaacttcatgatctagagatttggagagagagacaaagagaacaatacctgaagTTCAAGGAAGCTGTGGGAAGAcatggcaaatttagggc	3'	New	gp4	...((((((..(((((((((((((((((((((((((((((((((...........((((..........))))............))))))))))))))))))))))))))))))))).))))))...	122	41.4	-58.4	1.1	3	3	0	3	13	4	3.08924	2.58306	0	3.89112	12.9335	3.1531	middle
487	385	PC-3p-170836_8	ATTTGAGCCACAGAAATTAGGGCC	24	Sc0003671	+	152675	152820	gtagagggccctaatttttgtggctcaaatggctcgaatttgccaaaacgacgtcgttttgagtacaaaacaacatcaaaattgccaaaacgacgtcgttttggcaaatttgagccATTTGAGCCACAGAAATTAGGGCCctcaaa	3'	New	gp4	...((((((((((((((((((((((((((((((((((((((((((((((((((((((((((.(((.................)))))))))))))))))))))))))))))))))))))))))))))))))))))))))))))...	140	42.5	-109.6	1.8	5	3	0	0	0	0	5.14874	2.58306	0	0	0	0	low
488	386	PC-5p-118997_14	AACACTCTCTTTATTACATGATGT	24	Sc0003448	-	194499	194598	cctatctcaAACACCCTCTTTATTACATGATGTaccacattttaattaaataattaattatcttagtacatcgtgtggtgaatagagggtttgagatggg	5'	New	gp4	((((((((((..((((((((((..(((((((((((.......(((((((....))))))).....)))))))))))..)))..)))))))))))))))))	100	33	-44.5	1.3	8	10	3	0	0	0	8.23798	8.61018	3.2193	0	0	0	low
489	387	PC-3p-154470_10	AATCTCTCCTCAAATCTCACAGCC	24	Sc0000887	-	272786	272936	gtttggttggaggatttggggagagatttagaaagggaaagggaaacggtgtgtgaaactatgtgaaatgtaagcatattttttttcacatttcacctaccttttctatttttctttccaAATCTCTCCTCAAATCTCACAACCaaacaca	3'	New	gp4	(((((((((..((((((((((((((((((.(((((..(((..((((.(((..(((((...((((((((...((.....))...)))))))))))))..))).))))..)))..))))).))))))))))))))))))..)))))))))...	148	36.4	-74.5	1.4	3	2	0	0	0	0	3.08924	1.72204	0	0	0	0	low
490	388	PC-5p-162235_9	TAGGTAACTCAAATTTTTGTGGCT	24	xfSc0013110	+	777	931	aacgacaatgcTAGGTAACTCAAATTTTTGTGGCTcaaatggctcaaatctgtcaaaacgacgtcgttttgacagattttgagtgtaaaacgacgtcgttttgacagatttgagccatttgaaccacaaaaatttgagctaccaaacattttccc	5'	New	gp4	...((.((((...((((.(((((((((((((((.(((((((((((((((((((((((((((((((((((((((.........)).))))))))))))))))))))))))))))))))))))).))))))))))))))).))))...)))).))..	150	38.1	-92.3	1.6	6	3	3	0	0	0	6.17848	2.58306	3.2193	0	0	0	low
491	389	PC-3p-156016_9	TCCAAGTTCCTTCCCAAATTC	21	Sc0003179	+	102871	103031	tgttgtgttggttagaatatttggggagggatttgaaaaagaaaaaggaaaaggcgtgtgaaattatgtgaaatataggtatattttattcacatttcacatattttttccctttttcttTCCAAGTTCCTTCCCAAATTCcccaaccaaacacagcatta	3'	New	gp4	(((((((((((((.....(((((((((((((((((..((((((((((((((((..(((((((((...(((((((((....)))))))))....)))))))))..))))).))))))))))).))))))))))))))))).....)))))).)))))))...	158	32.9	-70.3	1.3	0	0	0	8	4	7	0	0	0	10.3763	3.97955	5.51792	middle
492	390	PC-5p-85200_20	AGAACTAAAACCTATGGCTGCAAC	24	Sc0000932	-	664372	664570	atgatactatcaaacaaagtaacattaacctggggaatgtcccaagtcttgaaaaAGAACTAAAACCTATGGCTGCAACtgaaaaacaatgcatttttgtacacaaaaatacttcatttttccgttgcagctaatggttttagttctttttcaaaaactaggacatcgccgcggtgaatcctgttttgtttaatagtat	5'	New	gp4	...(((((((.(((((((..(..(((.((((((.(.((((((..(((.(((((((((((((((((((..((((((((((.((((((......(((((((....)))))))......)))))).))))))))))..)))))))))))))))))))..))).))))))).))).))).)))..)..))))))).)))))))	196	34.2	-80.5	1.2	9	8	3	0	0	0	9.26772	6.88815	3.2193	0	0	0	low
493	391	PC-5p-141182_11	CATGTGAGCTGTCACCACTAC	21	Sc0001808	-	112427	112596	aacaatgctacaatgatcacattttaataccacgtttgatttacCATGTGAGCTGTCACCACTACattagttgaatggatcccatcacttgtgcctatttccaatgcagtggtgacaactcacatggtaaaccaaatgtggcataaaaatgtgatcattatagcattata	5'	New	gp4	...(((((((.((((((((((((((.((.(((((((((.(((((((((((((.((((((((((.((((....((((((....((.....))...))))))..)))).)))))))))).))))))))))))).))))))))).)).)))))))))))))).)))))))...	164	36.5	-83.4	1.3	0	0	0	0	7	4	0	0	0	0	6.96422	3.1531	low
494	392	PC-5p-81216_22	CTAAAGTTTCCTAGAGTACTT	21	Sc0001769	-	265666	265829	ggatcctctagagtaaaattttcCTAAAGTTTCCTAGAGTACTAcattgtgtggttgagatttactggcaagtcatatcagaaaaattgatgtgacttgctagtaaatctcaaccacacaatgtaacactttagaaaattttaggaaaaaatcactctagagga	5'	New	gp4	...(((((((((((....((((((((((((((.(((((((..(((((((((((((((((((((((((((((((((((((((.....)))))))))))))))))))))))))))))))))))))))..))))))).))))))))))))))....)))))))))))	161	33.5	-105.1	1.9	0	4	3	4	4	7	0	3.44407	3.2193	5.18816	3.97955	5.51792	low
495	393	PC-3p-179061_8	AAATCCCTTCTCAAATCTTCCAAC	24	Sc0005478	+	9030	9176	gttggagaatttgagcagggatttggaaagggaaagagaaagggaaaaggtgtgtgaaactaggtgaaatgtaagtatattatattcacatttcacctaacttttcccttttccctttctAAATCCCTTCTCAAATCTTCCAACcaa	3'	New	gp4	((((((..(((((((.(((((((((((((((((((.....(((((((((..((.....)).(((((((((((.(((((...))))).)))))))))))..)))))))))))))))))))))))))))).)))))))..))))))...	144	36.7	-76.5	1.4	0	4	0	0	0	8	0	3.44407	0	0	0	6.30619	low
496	394	PC-3p-118263_14	TGAACCATTTGAGTCACACTT	21	xfSc0000869	-	71930	72089	aaaagagcaatggtagagggccacaaaaagtgtggctcaaatggctcaaaactgtcaaaacgacgtcgttttgggcgcaaaacgacgcaaaacgacgtcgtttcgacagtttTGAACCATTTGAGCCACACTTtttgtgtccctcaaacatttttctaaa	3'	New	gp4	...(((..((((...(((((.(((((((((((((((((((((((.(((((((((((.((((((((((((((((..((.....))...)))))))))))))))).))))))))))).))))))))))))))))))))))).)))))...))))..)))...	154	43.1	-99	1.4	6	0	0	0	8	0	6.17848	0	0	0	7.95911	0	low
497	395	PC-5p-129209_12	AATGACAACGAGAGAGAGCACGC	23	Sc0003602	-	158645	158729	cTATGACAACGAGAGAGAGCACGCttgtaaacagtcatgctcgatgcatgaatgcagactagcgtgctctctctcgttgtcaggc	5'	New	gp4	...((((((((((((((((((((((.((...((.((((((.....)))))).))...)).))))))))))))))))))))))...	79	50.6	-55.6	1.3	3	3	0	0	0	6	3.08924	2.58306	0	0	0	4.72964	low
498	396	PC-3p-194361_7	ATCCCTCGTCAAATTCTCCAACCA	24	Sc0000004	-	1244005	1244154	gtttggttgggggatttggagagagaattggaaagggaaagggaaaaggtgtgtgaaactaggtgaaatgtaagtatattttatttacattttacttaatttttccttttccctttccaaATCCCTCGTCAAATCCTCCAACCAaacaca	3'	New	gp4	((((((((((((((((((..(((.((.(((((((((((((((((((((..((.....))(((((((((((((((((.....))))))))))))))))).))))))))))))))))))))).)).)))..))))))))))))))))))...	147	36.7	-85.9	1.6	2	0	7	5.5	3	0	2.05949	0	7.5117	7.13372	2.98467	0	low
499	397	PC-3p-151928_10	AATCCCTCCTCAAATTCTGCAACC	24	xpSc0053259	-	163129	163280	tgtttggttgggggatttggggagggatttggaaaggcaaagggaaaaggtgtgtgaaactagctgaaatgtaggtacattttattcacatttcacctaacttttccctttccctttctaAATCCCTCCTCAAATTCTCCAACCaaacacag	3'	New	gp4	(((((((((((((((((((((((((((((((((((((.(((((((((((....((((((.....((((((((....))))))))......))))))....))))))))))).)))))))))))))))))))))))))))))))))))))...	149	41.4	-91.2	1.4	3	6	4	0	0	4	3.08924	5.16611	4.2924	0	0	3.1531	low
500	398	PC-3p-104331_16	AAATCTCTCTCCAAATCCCTCAAC	24	Sc0000737	+	184116	184263	ggttgggagatttggagagggatttggaaagggaaatggaaaatgtaggtgaaatgtgaataaatcatgcctatatttcacataatttcacacatattttccttttccctttccctttgtAAATCTCTCTCCAAATCCCTCAACcaaa	3'	New	gp4	(((((((.((((((((((((((((((((((((((((.(((((((((..((((((((((((................)))))))...)))))..))))))))).)))))))))))......))))))))))))))))).)))))))...	145	36.5	-75.7	1.4	11	0	0	0	0	5	11.3272	0	0	0	0	3.94137	middle
501	399	PC-3p-185120_7	AATCTCTCTTCAAATCCTCCAACC	24	Sc0002808	+	158655	158806	tgtctggttgggggatttgatgagggatttagaaagagaaagggaaaaggtgtgtgaaactaggtaaaatataggtatattttattcacatttcacctaatttttctattttcctttctaAATCTCTCTTCAAATCCTCCAACCaaacacag	3'	New	gp4	(((.((((((((((((((((.(((((((((((((((..(((..((((((((((((((......(((((((((....))))))))))))))...)))))....))))..)))..))))))))))))))).)))))))))))))))).)))...	149	34.2	-70.9	1.4	3	0	0	0	0	7	3.08924	0	0	0	0	5.51792	low
502	400	PC-3p-173996_8	AATCCCTCTGCAAATTCCTCAACC	24	Sc0003484	-	150837	150989	gtgtttggttgggggatttggagaggatttggaaagggaaatggaaaaggtaggtaaaatgtgaataaatcatgcctatatttcacatagtttcacacaccttttccctttccctttctaAATCCCTCTCCAAATTCCTCAACCaaacacact	3'	New	gp4	(((((((((((((((((((((((((((((((((((((((((.(((((((((..((((((((((((................)))))))..))).))..))))))))).))))))))))))))).))))))))))))))))))))))))))...	150	39.2	-89.1	1.5	8	0	0	0	3	5	8.23798	0	0	0	2.98467	3.94137	low
503	401	PC-3p-79339_22	CGTGACTGTGGAGAAGAAGTGG	22	Sc0003846	+	93869	94082	ttatagccaaggacgtatactgggtggccccacttcttctccacagtcacagacttattagctgatgctaatagatttgacaacagtgtccctgaatctattagcatcagctaaaaagccCGTGACTGGGGAGAAGAAGTGGggccacccagtatatgtcgttggctataacaagaatagccaaactgagaggctcagttttatttcctctgca	3'	New	gp4	((((((((((.(((((((((((((((((((((((((((((((.(((((((...(((.(((((((((((((((((((((((((....))))...))))))))))))))))))))).)))...))))))).))))))))))))))))))))))))))))))).))))))))))...(((((...((((((((...)))))))))))))........	171	45.3	-138	1.4	9	7.5	3	1.5	2	3.5	9.26772	6.45764	3.2193	1.94556	1.98978	2.75896	low
504	402	PC-3p-75065_24	AAATCGCTCTCCAAATCTCCCAAC	24	xfSc0006124	+	3755	3908	gtatttggttgggagatttgaggagtgatttggaaagagaaatgaaaaaattaagtgaaatatgaataaaatatacttacatttcacctgatttcacacacattttctctttccttttttAAATCGCTCTCCAAATCTCCCAACcaaacacaac	3'	New	gp4	((.(((((((((((((((((..((((((((((((((((((((((...((((((.(((((((.(((.((.....)).))).))))))).))))))......)).)))))))))))......)))))))))..))))))))))))))))).))...	151	31.8	-65.2	1.3	6.5	9	3	0	5	3	6.69336	7.74917	3.2193	0	4.97444	2.36482	low
505	403	PC-3p-69937_26	AATCCCTCTTCAAATCTCCTAACC	24	Sc0000970	+	187440	187591	atgtttggttgggagagttggggaaggatttggaaagggaaagaaaaaagtgcgtgaaactaggtgaaatgtaggtgtattttattcgcatttcatctaacttttccctttccctttccaAATCCCTCTTCAAATCTCCTAACCaaacacaa	3'	New	gp4	.(((((((((((((((.(((..((.((((((((((((((((((..((((((.........((((((((((((..(((.....)))..))))))))))))))))))..)))))))))))))))))).))..))).)))))))))))))))...	148	38.8	-83.9	1.4	7	9	0	3	4	3	7.20823	7.74917	0	3.89112	3.97955	2.36482	low
506	404	PC-3p-253835_5	AATCGCTCTCCAAATCTCCAAACC	24	Sc0000155	-	1228226	1228377	tgtttggttggaagatttggagaggaatttggatagagaaatggaaaaggtaggtgaaatgtaaataaaatatacctatatttcacttagtttcacacatcttttccctttctatttccaAATCGCTCTCCAAATCTCCCAACCaaacacag	3'	New	gp4	(((((((((((.((((((((((((..(((((((...(((((.(((((((((..(((((((.......((((((....))))))......)))))))..))))))))).)))))...)))))))..)))))))))))).)))))))))))...	149	34.9	-72.6	1.4	7.5	0	0	0	0	0	7.7231	0	0	0	0	0	low
507	405	PC-5p-133930_12	ATTGGTCCAATAATTGTAGTCACA	24	Sc0000057	+	1181131	1181383	tagtccgagctgtggtgcctatcatggaccctactctgataatttgatttgttcatttttgttggaactttttgcgtagatcatctatgaaaaaaaaaaggaaaagaaaaagATTGGTCCAATAATTGTAGTCACAtgattttgtcaaatttgcttttaaaaataaactgtatattttcaaaatcatacttgttcatttttttaaagacaaatgtgataaaatcaaatggctacaattatcagatcaatcaaa	5'	New	gp4	...(((.......(((.((......)))))....((..((((..(((.....)))...))))..))..(((((.(((((.....))))).)))))....))).........((((((((..(((((((((((((..(((((((((((.(((((((((.((((((.(((.((((((((...)))).))))..))).))))))..)))).))))).)))))))))))..)))))))))))))..))))))))...	139	28.5	-72.2	1	7	5	0	0	0	3	7.20823	4.30509	0	0	0	2.36482	low
508	406	PC-3p-62800_29	AATCCTTCCTCAAATACCCCAACC	24	Sc0002607	-	317856	318007	tgtttggttgagggaattaaggagggatttagaaagggaaagggaaaagttaggtgaaatgtaaataaaatatacctacatttcacctagtttcacacaccttttccctttccatttccaAATCCTTCCTCAAATCCCCCAACCaaacacag	3'	New	gp4	((((((((((.((((.((.(((((((((((.((((.(((((((((((((((((((((((((((.............))))))))))))))..........))))))))))))).)))).))))))))))).)).)))).))))))))))...	149	38.2	-78.2	1.3	8	11	3	0	0	7	8.23798	9.4712	3.2193	0	0	5.51792	low
509	407	PC-5p-80764_22	TGATGAAGAGATGAGATGATT	21	Sc0000100	-	501541	501634	tacgtgaaggtgatgaaagTGATGAAGAGATGAGATGATAtgtatatatatatgagatgatcattaacttcatcaactccatcaccttcatcaa	5'	New	gp4	...((((((((((((....((((((((.(((((.((..((((((....))))))..))..)))))..))))))))....))))))))))))...	88	33	-34.3	1.1	5	7	5	0	5	0	5.14874	6.02713	5.3655	0	4.97444	0	low
510	408	PC-3p-131847_12	AATCTCTCCCTAAATCCCCCAACC	24	Sc0002047	+	37088	37238	tgtttagttgggggatttggggagggatttggaaagggaaatagaaaaggtgtgtgaaattaggtgaaatacaggcatgttttattcacatttcacctacattttctatttccctttttaAATCTCTCCCTAAATCCCCCAACCaaacaca	3'	New	gp4	(((((.((((((((((((((((((((((((..((((((((((((((((.((..(((((((...(((((..(((....)))....))))))))))))..)).))))))))))))))))..)))))))))))))))))))))))).)))))..	149	37.7	-86.9	1.5	0	9	0	0	0	6	0	7.74917	0	0	0	4.72964	low
511	409	PC-5p-199786_7	AAAGACGATCCTCACAACCCCTAC	24	Sc0000496	+	716138	716292	tttgaaatccccacaAAAGACGATCCTCACAACCCCTACtgatgtattgaccattgatatgtttgaattttttttgaaaattgtgtctgacagtgacataaatggttcagatcattttaagggttgtgagggttgtgttttgtggggatctctat	5'	New	gp4	...((.((((((((((((.((((((((((((((((.((..((((..(((((((((......((..((.....))..))...((((((.......))))))))))).))))..)))).)).)))))))))))))))).)))))))))))).))...	149	36.8	-68.2	1.2	21	3	0	0	0	7	21.6247	2.58306	0	0	0	5.51792	middle
512	410	PC-3p-123173_13	AGTCCCACACCCATATGAGACATT	24	xfSc0001734	+	375	530	aaaaatgttagagattttaaaaattttaccaaaagttttaccaaatgtctcacatgggtgtgggattcacatgggacccacattgtgtgAGTCCCACACCCATATGAGACATTtgataaaacttttagtagaatatttgcgatctctagcattatt	3'	New	gp4	...((((((((((((..((((.(((((((.((((((((((.(((((((((((.((((((((((((((((((..(........)..)))))))))))))))))).))))))))))).)))))))))).))))))).))))..))))))))))))...	150	34	-88.3	1.7	6	4	0	0	3	0	6.17848	3.44407	0	0	2.98467	0	low
513	411	PC-3p-160663_9	AATTTTGAGCCATTTAAGCCACAC	24	Sc0001091	+	190571	190730	tgaagggtaatggtagagggtcacaatttttgtggctcaaatggcttaaaactgttaaaacgacgtcgttttgagcacaaaacatgccaaaacaacgtcgttttgatAATTTTGAGCCATTTAAGCCACACaaattgtgactctcaaacattattctagt	3'	New	gp4	...((..(((((...((((((((((((((.(((((((.(((((((((((((.((((((((((((((.((((((.(((.......))))))))).)))))))))))))).))))))))))))).))))))).))))))))))))))...)))))..))...	154	36.9	-88.3	1.5	4.5	1.5	0	0	0	0	4.63386	1.29153	0	0	0	0	low
514	412	PC-3p-176790_8	TTCCTTTCCCTCTGCAAATCC	21	Sc0004464	-	53012	53163	ctactttaggttgtgtttggatcttagatttggggaggaatttgttgagggaaagaaaaatgtgattgaactataagctgactttttgtcacttTTCCTTTCCCTCTGCAAATCCctctcgaaatcataaatccaaacacagccttaaggaa	3'	New	gp4	...(((.(((((((((((((((.((((((((.((((((.(((((..(((((((((.((((.(((((.....................))))))))).)))))))))..))))).)))))).))))).)))))))))))))))))).)))...	146	37.5	-69.7	1.2	0	0	0	1.5	1.5	4	0	0	0	1.94556	1.49233	3.1531	low
515	413	PC-3p-54029_35	CCCTTTCCCTTTCCTTTCTTT	21	Sc0001286	+	183564	183721	agtctgtgtttgaatcaatgatttgagggatttgcacgcagaaaggaaatagaaagggaaaagtgaatgaaatagaagttaaatttttgtcacatttccctttCCCTTTCCCTTTCCTTTCTTTccacaaataccaatcgtggatccaaacacagccc	3'	New	gp4	.(.(((((((((.(((.((((((...((.(((((.....((((((((((..((((((((((...(((((..((((((((...))))))))..)))))...))))))))))..)))))))))).....))))).)))))))).))).))))))))))..	155	38	-56.7	0.9	7	0	0	4	10	14	7.20823	0	0	5.18816	9.94888	11.0358	middle
516	414	PC-3p-6962_255	TTTTGACAGTTTCAAGCCATT	21	Sc0000800	+	705824	705973	tgcttggtggcccgaaatttagtggctcgaatggttcgaaattgttaaaacgaaagtgttttggacgcaaaacgatgcaaaatgacgcaaaacgacatcaTTTTGACAGTTTCAAGCCATTtgagcctatgattttgtggccctcaaaca	3'	New	gp4	.(.(((..(((((((((((....(((((((((((((.(((((((((((((.((....((((((....))))))..(((........)))........)).))))))))))))).)))))))))))))...))))))).))))..))).).	148	41.3	-60.3	1	38	50	24	13	13	11	39.1304	43.0509	25.7544	16.8615	12.9335	8.67102	middle
517	415	PC-3p-94023_18	CTTTCCAAACACCTCCTCAAA	21	Sc0001504	-	56573	56717	ttaatgttgtgtttggttgggggatttggggagggatttggaaagggaaagggaaaaggtgtgtgaaactaggtgaaatgtacctaactttttcctttctCTTTCCAAACCCCTCCTCAAAtcctccaaccaaacacagcgtaaa	3'	New	gp4	...((((((((((((((((((((((((((((((((.((((((((((((((((((((((..((.....)).(((((.....)))))..)))))))))))))))))))))).))))))))))))))))))))))))))))))))...	139	42.8	-95.9	1.5	0	0	7	6	4	4	0	0	7.5117	7.78224	3.97955	3.1531	low
518	416	PC-3p-91294_19	ATTTCTCTTTTCAAATCCCTCCCC	24	Sc0003090	-	211753	211919	tttatgctgtgtttggttgggagatttgaggagggatttggaaaaggaaagggaaaatgtgtgtgaaactaggtgaaatttaggcatgttttattcacatttcacttacattttctATTTCTCTTTTCAAATCCCTCCTCaaatctcttaaccaaacacagcattag	3'	New	gp4	...(((((((((((((((..((((((((((((((((((((((((..((((..((((((((..((((((....(((((((........))))))).....))))))..))))))))..))))..))))))))))))))))))))))))..)))))))))))))))...	161	35.3	-93	1.6	10	7	6	0	0	0	10.2975	6.02713	6.4386	0	0	0	middle
519	417	PC-5p-199210_7	ATTCTGTGACTCAAATGGCCCGAA	24	Sc0001375	+	256883	257042	ggcaatgattggtgaccacaaATTCTGTGACTCAAATGGCCCGAAaatgccaaaacgacgtcgttttcggtacaaaacaacactggaaatgccaaaacgacgtcgttttgacattttcgagccatttaagccacataatttgtggccaccaaacattttc	5'	New	gp4	...((((.((((((.(((((((((.((((.((.(((((((.((((((((.(((((((((((((((((.((((.....((....))....))))))))))))))))))))).)))))))).))))))).)).)))).))))))))).)))))).))))...	154	42.5	-81.1	1.2	0	10	0	0	0	0	0	8.61018	0	0	0	0	low
520	418	PC-5p-113370_14	TTCTGGTCACAATGGCTCAAA	21	Sc0000323	-	744923	745026	ctagagggccacaatttTTGTGGTCACAATGGCTCAAAactgtcaaaataacgtcgttttggcagttttaagccattgtgaccacaaaaattgtggccctcaaa	5'	New	gp4	...(((((((((((((((((((((((((((((((.((((((((((((((......)))))))))))))).)))))))))))))))))))))))))))))))...	98	41.3	-77.6	1.8	2	0	3.5	0	0	1.5	2.05949	0	3.75585	0	0	1.18241	low
521	419	PC-3p-112120_15	AATCTCTTTTCAAATCCTCCAACC	24	Sc0002794	+	231973	232121	taagttcggttgggggatttggaaacggatttgaatatgaaaagggaaaaaataggtgaaatgtgaataaaatataccttcattttagtttcacacatcttttctattttcttttccaAATCTCTTTTCAAATCCTCCAACCaaacact	3'	New	gp4	...(((.((((((((((((((((((..((((((.....((((((..((.....(((((...((((((((((((........))))))..)))))))))))......))..))))))))))))..)))))))))))))))))).)))...	143	31.5	-54.7	1.2	14	13	0	0	0	3	14.4165	11.1932	0	0	0	2.36482	middle
522	420	PC-5p-272985_4	CTCAATCAATTATGGTCGGTC	21	xfSc0000445	-	110026	110170	tcatCTCAATCAATTATAGTCGGTCaatttaataaagtggagatttaaagtctcacgtgattgagatctgccttctctgaaacggcaaagctggaatcttgaactctcctttaagattaagttgactaattttgattggtcgaga	5'	New	gp4	...((((.((((((((.(((..(((((((((((.....((((((((((.((((((......)))))).((((...........))))...........))))).)))))......)))))))))))..))).)))))))).))))	142	35.9	-44.6	0.9	0	5.5	0	0	0	0	0	4.7356	0	0	0	0	low
523	421	PC-3p-178034_8	AATCCTTCCTCAAATCCCTTAACC	24	Sc0000991	-	135536	135688	gtgtttggttgagggatttgaggagagatttggaaagggaaatggaaaggtaggtgaaatgtgaaaaaaatatacctacatttcacatagtttcacacaccttttccctttctctttccaAATCCTTCCTCAAATCCCTTAACCaaacacagc	3'	New	gp4	((((((((((((((((((((((((..((((((((((((((((.((((((((..(((((((((((((..............))))))))...)))))..))).))))).))))))))))))))))..))))))))))))))))))))))))...	150	38.6	-89.1	1.5	11	0	0	0	0	0	11.3272	0	0	0	0	0	middle
524	422	PC-5p-88645_19	AATATCACCTTAGCCCTCTTCACC	24	Sc0000922	+	342144	342300	cactttaccccttcaactatcactgAATATCACCTTAGCCTTCTTCACCtttaaaactgtacatttagactcctcaactatcagggttctaaatatatggttttaaagttgaggagaggtaaggtgatattcagtgtttgttgaaggaggtaaaacc	5'	New	gp4	...((((((((((((((...(((((((((((((((((.(((((((((.(((((((((..((.(((((((..(((........)))..))))))).))..))))))))).)))))).))))))))))))))))))))...)))))))).))))))...	151	36.9	-82.2	1.4	13	18	0	3	3	12	13.3867	15.4983	0	3.89112	2.98467	9.45929	middle
525	423	PC-3p-89668_19	AATCCCTCTTCAAATCCTCTAACC	24	Sc0000969	+	179199	179350	tgtttagttaagggatttggagagggatttgaaaatggaaagggaaaatgtgtgtgaaactaggtgaaatgcaaatatattttattcacatttcaccaaacttgtccctttctctttccaAATCCCTCTTCAAATCCTCTAACCaaacacag	3'	New	gp4	(((((.((((..(((((((((((((((((((.(((..((((((((....((((.....))..(((((((((..((((.....))))..)))))))))..))...))))))))..))).)))))))))))))))))))..)))).)))))...	149	35.5	-69.4	1.3	8	7	0	0	0	4	8.23798	6.02713	0	0	0	3.1531	low
526	424	PC-3p-180706_8	CTTTCCCATATCCCCAACCAA	21	Sc0001033	-	321877	322021	cgatgtgtttggttgagggatttgagaagaatttgaaaagagaaagggaaaatgtgtgtgaaactaggtgaaatgtaggtatattttattcatattttacctaactttttcatttcCCTTCCCATATCCCCAACCAAacacagtg	3'	New	gp4	...((((((((((((.(((((.((.((((.....((((.(((((((.........((.....)).(((((((((((..(((.....)))..)))))))))))..))))))).)))).)))).)).)))))))))))))))))...	139	35.2	-53.7	1.1	0	0	0	0	3	12	0	0	0	0	2.98467	9.45929	low
527	425	PC-3p-98542_17	CAAATCTCTCCTCAAATCCCCT	22	Sc0005465	+	55089	55244	tgtgtttagtttggggatttggggagaaatttggaaatggaaaggaaaaatgtgtgtgaaactaggtgaaatttatgtatattttattcaaatttcatctacattttccatttcttttttCAAATCTCTCCTCAAATCCCCTaatcaaacacataa	3'	New	gp4	(((((((..((.(((((((((((((((.(((((((((..((((((((((.(((..........(((((((((((..(((.....)))..)))))))))))))))))))).))))..))))))))).))))))))))))))).))..)))))))...	153	30.1	-66.1	1.4	6	6	0	0	0	5	6.17848	5.16611	0	0	0	3.94137	low
528	426	PC-3p-156192_9	ACGTCGTTTTAGCAATTTCGAGCC	24	Sc0000882	+	118860	119040	tttttaaggaagatgtttgagggacataatttttgttgctcaaatggttcaaaattgtcaaaacgatgtcgttttgacaattttaaatttgttttgtactcaaaacgACGTCGTTTTAGCAATTTCGAGCCatttgagccacaaaaattgtgaccctcaatcattgctgtttttttaattg	3'	New	gp4	...((((..((((((.(((((((.((((((((((((.(((((((((((((.((((((..((((((((((((((((((......((((.....))))...))))))))))))))))))..)))))).))))))))))))).)))))))))))).))))))).)))).....))..))))...	175	32	-83.1	1.4	6	6	0	0	0	0	6.17848	5.16611	0	0	0	0	low
529	427	PC-5p-188585_7	ATGAAAATCATCTGCACCGTTAGA	24	Sc0000240	+	413466	413661	tttgaaatgaaaattttacgttgttatatatataatgagggaaatgttaggtgtcatgaagaattttcATGAAAATCATCTGCACCGTTAGAtcaggtatgtgtctcatgatccaatggtgcagatgattttcatcacagttttcatgaaacgtagcaggacccatataaaaatgatgtacgattttttttttttt	5'	New	gp4	...((((..(((((..(((((..((...(((((.....(((...(((((.((.(((((((((......(((((((((((((((((((((.(((((((........)).))))).))))))))))))))))))))).....))))))))).)).)))))...))))))))..))..)))))..)))))..))))...	190	31.1	-72	1.2	4.5	2	0	0	0	0	4.63386	1.72204	0	0	0	0	low
530	428	PC-3p-153004_10	AATCCCTTCTCAAATTCCCTAACC	24	Sc0000408	+	660871	661021	gtttggttggggatttgagaagggatttggaaaaaaaaaaagagaaaatgtaggtgaaatgtgaataaaatatatctacatttcatttagtttcacacactttttccttttcccttttcaAATCCCTTCTCAAATTCCCTAACCaaacaca	3'	New	gp4	(((((((((((((((((((((((((((((((((....(((((.(((((.((..(((((((.(((((.((((........)))).))))))))))))..)).))))))))))...))))))))))))))))))))).))))))))))))...	148	31.8	-68.3	1.4	3	4	0	0	0	3	3.08924	3.44407	0	0	0	2.36482	low
531	429	PC-3p-21729_87	TTCAAGCCATTCGGGTCACAC	21	Sc0002910	+	28522	28658	atacttgatagcttgaattttcatgatccgaatggttcgaatgtcttaaaacgacgtcgttttgggagtaaaacgaaacgacgtcgttttgatataTTCAAGCCATTCGGGTCACACagattcgaactaccaagcat	3'	New	gp4	...((((.(((.((((((((...((((((((((((((.((((((.(((((((((((((((((((.........))))))))))))))))))).)))))).))))))))))))))...)))))))).))).))))...	131	39.4	-69.3	1.3	13	13	17	14	11	33	13.3867	11.1932	18.2427	18.1585	10.9438	26.013	middle
532	430	PC-3p-116009_14	GTAGCACTCTAGAAAACTTTAGGG	24	Sc0000062	+	1580957	1581122	atcctctagagtgaaattttcctaaagttttctatagtgctatattgtgtggttgaggtttactggcaagtcacatcagaaaaattgatgtgacttgccagtaaatttcaaccacacaatGTAGCACTCTAGAAAACTTTAGGGaaaaatcactctagaggatcct	3'	New	gp4	((((((((((((((..((((((((((((((((((.(((((((((((((((((((((..(((((((((((((((((((((.....)))))))))))))))))))))..))))))))))))))))))))).))))))))))))))))))..))))))))))))))...	163	36.1	-122	2	4	6	0	0	4	0	4.11899	5.16611	0	0	3.97955	0	low
533	431	PC-3p-125637_13	ATCTCTCCTCAAATCCCCAAC	21	Sc0005710	+	7591	7739	gtttggttgggagatttagggagggatttggaaatggaaagagaaagggtgtgtgaaattaggtgaaatataggtatattttattcacattgcacctgccttttccatttccttttccaaATCTCTCCTCAAATCCCCAACcaaacata	3'	New	gp4	(((((((((((.(((((..(((((((((((((((.(((((..(((((((((((..(......(((((((((....))))))))).....)..)))..))))))))..))))).)))))))))))))))..))))))))))))))))...	146	38.3	-77.4	1.4	0	6	0	3	8	16	0	5.16611	0	3.89112	7.95911	12.6124	middle
534	432	PC-3p-38060_50	AGGCAACGACTTTGGCTAGT	20	Sc0000365	-	200786	200962	agagaggaagagagggcttacatgaagttaagagtcatgtgtttgatagccaaggttgatttgcctataccaaaccgaggtgtctttggtattggaaccctcgtttggttcctAGGCAACGACTTTGGCTAGTctaactaactcttctctcccatgctagcccttctcttcttcatt	3'	New	gp4	...(((((((((((((((..((((.((..((((((.....(((.((((((((((((((..(((((((.(((((((.((((..(((........)))..)))))))))))...))))))))))))))))))).)).)))..))))))..))..))))..)))))).)))))))))...	171	44.6	-83.7	1.1	0	3	8	13	14	30	0	2.58306	8.5848	16.8615	13.9284	23.6482	middle
535	433	PC-5p-39590_48	AGCTCCTCATGTTCTCTGAGTGC	23	xfSc0001274	+	13102	13308	tctatgttgcaattagtagttctaccgtttaaatgtagtccatcttgtagagatttcgtgtagtAGCTCCTCATGTTCTCTGAGTGCatactagacaaggtatagcagtacacccagtctatgtcgtgtacttggagaaccatggggagatgctgccgaaatttcgttagagatggaaagagcggtatgagctactttttacaatat	5'	New	gp4	...((((((.((..((((((((((((((((........((((((((...(((((((((.((((((.((((((((((((((..((((((((((((((..(((.((....)).)))..))))).)).)))))))..))))).))))))))).)))))))))))))))....))))))))..)))))))).))))))))..)).))))))	204	41.1	-99.4	1.2	6	14	7	7	3	11	6.17848	12.0543	7.5117	9.07927	2.98467	8.67102	middle
536	434	PC-5p-151859_10	AGAATTTGCGACGGCACAACTTGC	24	Sc0000807	+	672098	672258	nnntgccgtctcaaaaaagcagAGAATTTGCGACGGCACAATTTGCcgtctcaaaaaatgagagtatttgcgacggcagaaaataccgtcacaaatactctcattttttgagatggcaaatagtaccgtcgcaaatgctctgcttttttgagacggcaaat	5'	New	gp4	...(((((((((((((((((((((.(((((((((((.((.((((((((((((((((((((((((((((((.(((((.........))))).)))))))))))))))))))))))))))))).)).))))))))))).)))))))))))))))))))))...	155	41	-115.5	1.7	4	3	0	0	0	3	4.11899	2.58306	0	0	0	2.36482	low
537	435	PC-3p-155522_10	AACCGTTGGATCAACTTAAAGTGT	24	Sc0004491	-	27622	27792	ctttcttacttgcaatggtgaagatgcattttgaattgatccaatggttcaaatttaggcaagaaaagcaaatttgaatttgttttattattttttattatttttaaatagccaaatctaAACCGTTGGATCAACTCAAAGTGTatttccaccattacaaataaggagata	3'	New	gp4	.(((((((.(((.(((((((.(((((((((((((.((((((((((((((...((((.(((....(((((((((....))))))))).......((((.......))))..)))))))...)))))))))))))).))))))))))))).))))))).))).)))))))...	167	28.1	-63.9	1.3	5	10	0	0	0	0	5.14874	8.61018	0	0	0	0	low
538	436	PC-5p-164894_9	AATTATGTGGTTGAGATTTACTGG	24	Sc0003072	-	265214	265392	caccaaggatcctctagagtgaaatttctctaaagtttcctagagtgctaTATTATGTGGTTGAGATTTACTGGcaagtcacaccagaaaaattgatgtgacttgccagtaaatctcaaccacacaatataacattctaggaaactttaagaaaaaatcactctagaggatccttgctt	5'	New	gp4	...(((((((((((((((((((..(((((.(((((((((((((((((.((((((.((((((((((((((((((((((((((((.(((.....))).)))))))))))))))))))))))))))).)))))).))))))))))))))))))))))...)))))))))))))))))))...	173	36.3	-120	1.8	8	4	0	0	0	0	8.23798	3.44407	0	0	0	0	low
539	437	PC-3p-130177_12	ATAGCACTCTAGGAAACTTTAGAG	24	Sc0001224	+	26569	26734	atcctctagagtgaaattttcctaaagtttcttagagtgctacattgtgtggttgagatttactggcaagtcacatcagaaaaattgatgtgacttgccagtaaatctcaaccacacaatATAGCACTCTAGGAAACTTTAGAGaaaaatcactctagaggatcct	3'	New	gp4	((((((((((((((..((((((((((((((((((((((((((.((((((((((((((((((((((((((((((((((((.....)))))))))))))))))))))))))))))))))))).))))))))))))))))))))).))))).))))))))))))))...	163	36.7	-123.9	2	6	3	3	0	0	0	6.17848	2.58306	3.2193	0	0	0	low
540	438	PC-3p-205143_7	TCACACATACAACACACCACT	21	Sc0001496	-	465525	465702	ttctcgagcaaggatcctctagagttttttttttcctaaagtttcctagagtagtgtgttgtatggttgagatttaatgacaagtcacatcaattttttaacattaaatcTCACTCATACAACACACCACTttaggaaactttaggaaaataaaactctagaggatccttggtggttt	3'	New	gp4	...(((..((((((((((((((((((((..((((((((((((((((((((((.((((((((((((..((((((((((((......................))))))))))))..)))))))))))).)))))))))))))))))))))).)))))))))))))))))))).)))...	172	33.7	-101.3	1.7	0	0	3	4	4	0	0	0	3.2193	5.18816	3.97955	0	low
541	439	PC-5p-75716_24	TCTCCTCTTGGCAACCAGTGT	21	Sc0001524	+	441529	441644	cactgcaagtgaattactgagtgagTCTCCTCTTGGCAACCAGTGTtgtagttgtctgtgaagagtatcatcactgtttgccaaaggagatttgctcattaatttcatgtgcaata	5'	New	gp4	...((((..(((((((.((((..((((((((.(((((((.(((((.((......(((....)))....)).))))).)))))))))))))))..)))).))))).))..))))...	110	40.5	-50.3	1.1	3	21	7	0	0	0	3.08924	18.0814	7.5117	0	0	0	middle
542	440	PC-3p-171905_8	TTGGCAGATTATTTGGGTCCA	21	Sc0005237	+	63805	63942	gatcccaaataatctactaaattttctaccaaatctctcacatgggtgtgggacccacacacatgtgggtttgtgtgggtctcacacccatgtgagaggtttgatagaaaatTTGGTAGATTATTTGGGTCCAtagca	3'	New	gp4	((.(((((((((((((((((((((((((.((((((((((((((((((((((((((((((((.((....)).)))))))))))))))))))))))))))))))).))))))))))))))))))))))))))).......	131	42	-98.4	1.7	3	0	0	0	3	9	3.08924	0	0	0	2.98467	7.09447	low
543	441	PC-5p-102809_16	ATTCCCTCACTATGAATCTCCTCC	24	xfSc0001610	-	24491	24654	acttaatcccctcaccatcaATTCCCTCACTATGAATCTCCTCCattttaccttgaaacaaacagagcctaaccttaaaccatcaattaacactattctcatctgttttcagagataaaatggaggagattcatagtgagtggattaatagtgaggggattgtt	5'	New	gp4	...((((((((((((.((.(((((.(((((((((((((((((((((((((.(((.....(((((((...................................)))))))...))).))))))))))))))))))))))))).))))).)).))))))))))))..	159	37.2	-74.534	1.2	11	7	0	0	0	4	11.3272	6.02713	0	0	0	3.1531	middle
544	442	PC-3p-104237_16	TCGACCACACAACGCACCACT	21	Sc0000072	-	1015746	1015928	gtggagtaaggaatagcaccaaggatctagtgttttttatctaaaattttttaaaggggtgtattgtgtggttgagatttaatgttaaaaaattgatttgatttatcattaaatcTCAACCACACAACGCACCACTttagaaaattttaaaaaaaagaatagaggaaaggatccttgctcaag	3'	New	gp4	...(((((((((......((.....((((...((((((...(((((((((((((((.((((..(((((((((((((((((((((.((((.((.....))..)))).)))))))))))))))))))))..)))).)))))))))))))))..))))))..)))).....)).)))))))))...	177	30.6	-73.7	1.3	4	0	0	4	0	12	4.11899	0	0	5.18816	0	9.45929	low
545	443	PC-3p-7375_242	ACAATTCATCTCTTGGCTATG	21	xfSc0000229	+	37017	37187	tcaaagatctttaagggcattgcctggatagaaagagagtgcaatggagccaaggatgaattgtccggaccagtatattaggtgagctaaccctcgcttgtatctctattgACAATTCATCTCTTGGCTATGttgggctctcttctctttatgtaatgccatgatcttcac	3'	New	gp4	...((((((......((((((((.(..(.((.(((((((..((((..((((((((((((((((((......((.((((.(((((((......))))))))))))).....))))))))))).)))))))..))))..))))))))).)..).))))))))..))))))...	165	42.7	-71.1	1	43	8	6	58	150	104	44.2791	6.88815	6.4386	75.2283	149.233	81.9805	middle
546	444	PC-3p-154938_10	AATCCTTTCTCAAATCCCTCAACC	24	Sc0003999	+	137715	137866	tgtttggttggaggatttgggaaagaatttagaaagagaaaggaaaaagatgtgtgaaactaagtgaaatataagtatgttttattcacatttcacctaacttttccattttccttttcaAATCCTTTCTCAAATCCCTCAACCaaacacag	3'	New	gp4	((((((((((..(((((((((((((.((((..((((..(((((((((......((((((...((((((((((....))))))))))....)))))).....)))))).)))..))))..)))).)))))))))))))..))))))))))...	149	32.2	-59.1	1.2	5	0	0	0	0	5	5.14874	0	0	0	0	3.94137	low
547	445	PC-3p-1581_1049	GTTCAGTGAAGCTGTGGAAAG	21	Sc0004056	-	151371	151491	aaatgaccctctttgtatttttccacagctttcttgaactgcattagtgaaatcttgatttttttatgattcaattgttgcgGTTCAGTGAAGCTGTGGAAAGatacagatagagtcaagc	3'	New	gp4	...((((.((.((((((((((((((((((((..((((((((((..(((..((((.(((.....))).))))..)))..))))))))))..)))))))))))))))))))).)).))))...	115	35.5	-56.4	1.3	528	502	475	98	145	236	543.706	432.231	509.723	127.11	144.259	186.033	middle
548	446	PC-3p-47709_40	TTCCCTTCCCAAATCCCCCAT	21	Sc0002426	-	92634	92783	gtttagttgggggattttgggagggatttggaaagggaaatggaaaaggtaggtgaaatgtaaataaaatatgtatatatttcacatagtttcacacaccttttccctttccctttccaaTTCCCTTCCCAAATCCCCCAAccaaacaca	3'	New	gp4	((((.((((((((((((.((((((((.(((((((((((((.(((((((((..(((((((.......((((((....))))))......)))))))..))))))))).))))))))))))).)))))))).)))))))))))).))))...	147	38.7	-86.7	1.5	7	5	8	0	8	12	7.20823	4.30509	8.5848	0	7.95911	9.45929	low
549	447	PC-3p-99393_17	TTCGTGGGATGAAAGGCTTTT	21	Sc0000233	-	15518	15637	atagacaggctaataaaagtctttcatttcatgaatctaattttttcatgagtgttactaatgttgtgttcacggaaaaattggaTTCGTGGGATGAAAGGCTTTTattagcctgtcaaa	3'	New	gp4	...((((((((((((((((((((((((..((((((((((((((((((.(((..(..((....))..)..))).))))))))))))))))))..))))))))))))))))))))))))...	114	32.5	-69.8	1.8	0	3	0	5	12	0	0	2.58306	0	6.4852	11.9387	0	middle
550	448	PC-3p-57867_32	ATAGCACTCTAGAAAACTTTAGGG	24	Sc0005839	+	61387	61551	tcctctagagtgaaattttcctaaagtttcctagagtgttacattgtgtggttgagatttactggcaagtcacatcaattttttctgatgtgacttgccagtaaatctcaaccacacagtATAGCACTCTAGAAAACTTTAGGGaaaaatcactctagaggatcc	3'	New	gp4	(((((((((((((..((((((((((((((.(((((((((((.(((((((((((((((((((((((((((((((((((........))))))))))))))))))))))))))))))))))).))))))))))).))))))))))))))..)))))))))))))...	162	37.6	-121.3	2	13	9	0	0	5	5	13.3867	7.74917	0	0	4.97444	3.94137	middle
551	449	PC-5p-36220_53	GAAAAATAATGTGTGGTTCAGATT	24	Sc0000132	-	889649	889844	aagatccaaatactgttttaaaatatgtatacaaaatttatgcacagaattatacttaGAAAAATAATGTGTGGTTCAGATTcaattctggtatgataaatcccagatcttgaatgagtttgaatcacatattatattttccgagtatttttctgtgtatgaattttgtgttagtgtcgttatttatttgggtata	5'	New	gp4	...(((((((((..((......((((..(((((((((((((((((((((..(((((..((((((((((((((((((((((((((..(((((.((.....)).))))).......))))))))))))))))))))).)))))..)))))..)))))))))))))))))))))..))))....)).)))))))))...	190	26.5	-77.7	1.5	25	24	8	0	0	0	25.7437	20.6644	8.5848	0	0	0	middle
552	450	PC-3p-106926_15	ATTTCACATACCTTTTCTCTTTCC	24	xpSc0053254	+	402895	403073	gtgactctaatgctgtgtttggttgagttatttgaggagggatttggaaagagaaatgaaaaaggtaggtgaaatatgaaaaaaatatgtctacatttcacataATTTCACATACCTTTTCTCTTTCCctttctaaattcctccccaaatcttccaaccaaacacagcgtaagagtttt	3'	New	gp4	..((((((.((((((((((((((((....(((((.((((((((((((((((.((((.((((((((((.((((((((((........(((....)))....))).))))))).)))))))).)))))).)))))))))))))))).)))))....)))))))))))))))).))))))..	175	34.6	-82.9	1.3	15	3	0	0	0	4	15.4462	2.58306	0	0	0	3.1531	middle
553	451	PC-5p-150284_10	GGATCTCATAATCCCCAAGTGAT	23	Sc0006572	+	288	413	gaagatccttgattttggGGATCTCATAATCCCCAAGTGGTccatctcactcttgatgtgggtcgcacacatacattagtgtggatcactttgggggttgtgaggcccccaaaattgggggtccga	5'	New	gp4	...((((((..(((((((((..((((((((((((((((((((((...((((..(((((((.......))))).))..)))))))))))).))))))))))))))..)))))))))..))))))...	120	50	-77	1.2	5	5	0	0	0	0	5.14874	4.30509	0	0	0	0	low
554	452	PC-5p-113226_14	AAAAATGATTGGACGTCGGTAACT	24	Sc0000165	+	524572	524731	tatttatgcaaaaaatAAAAATGATTGGACATCGGTAACTatatatttgaatcatttttattttgaaaaatcaacaacaaatataatttcaagaatatacattcattttttgtaataaaaatataattatcgatatccgatcatcttattttttgtatga	5'	New	gp4	...(((((((((((((((..(((((((((.((((((((.(((((.((((...........((((((((..................))))))))...((((.........)))).)))).))))).)))))))).))))))))).)))))))))))))))	157	18.8	-40.2	1.3	8	7	0	0	0	5	8.23798	6.02713	0	0	0	3.94137	low
555	453	PC-5p-107662_15	ATACCCTCCTAATTCCCCTAA	21	xpSc0053869	-	801	918	agtcctaaaaATACCCTCCTAATCCCCCTAAtttccaatttgggcaactttttcctttttttttctttttttacttgatatggaaattagggggattagggggggtatttttaggggg	5'	New	gp4	..(((((((((((((((((((((((((((((((((((....(((........)))........((...........))..)))))))))))))))))))))))).)))))))))))..	114	37.3	-59	1.3	0	0	0	0	7	8	0	0	0	0	6.96422	6.30619	low
556	454	PC-3p-131096_12	AATTCCTCTCTAAATCCCCCAACC	24	Sc0000805	-	688042	688193	tgtttggttggaagatttggggagggatttgaaaagagaaagggaaaaggtgtgtgaaactaggtgaaatatacgcatattttattcacatttcacctatcgtttctatttctttttccaAATTCCTCTCTAAATCCCCCAACCaaacacag	3'	New	gp4	(((((((((((..((((((((((((((((((.(((((((((..((((((((((((((......(((((((((....))))))))))))))...)))))....))))..))))))))).))))))))))))))))))..)))))))))))...	149	36.8	-68.3	1.2	7	11	0	0	0	4	7.20823	9.4712	0	0	0	3.1531	low
557	455	PC-5p-128685_12	CGGTCTGCCACAACCATCCAGT	22	Sc0000015	+	2424	2580	ctttatctgctacaaCGGTCTGCCACAACCATCCAGTgtcctctacagcgttatgacacaaccatctagtgtcttcaccaacggtctgacactggatggttgtgtcataacgttgtagaggacactggatggttgtggcagaccgttgtagcagata	5'	New	gp4	...((((((((((((((((((((((((((((((((((((((((((((((((((((((((((((((((((((((...(((...)))..))))))))))))))))))))))))))))))))))))))))))))))))))))))))))))))))))))))	154	48.4	-142.1	1.9	3	4	0	0	0	5	3.08924	3.44407	0	0	0	3.94137	low
558	456	PC-3p-304648_4	ATCTCAATCATACAACACACCACT	24	xfSc0002002	+	25118	25211	ccaagtggtgtgttgtatgggtgagatttaatgttaaaaaattaatgtgacttgtcattaaATCTCAATCATACAACACACCACTctaagaaac	3'	New	gp4	...((((((((((((((((..((((((((((((.......((....)).......))))))))))))..)))))))))))))))).........	82	33	-42.6	1.4	1.5	5	0	0	0	0	1.54462	4.30509	0	0	0	0	low
559	457	PC-3p-142896_11	TTCTCTTTCCAAATCCCGTCC	21	Sc0005781	+	34043	34175	tgggggatttaggaagggatttggaaagggaaatggaaaaggtaggtaaaatgtgaataaatcatgtctatatttcacatagtttcacacaccttttccctTTCTCTTTCCAAATCCCGTCCaaaatcccnta	3'	New	gp4	((.(((((((.(((.((((((((((((((((((.(((((((((..((((((((((((................)))))))..))).))..))))))))).)))))))))))))))))).))).))))))).))	133	37.6	-63.8	1.3	0	0	0	3	4	4	0	0	0	3.89112	3.97955	3.1531	low
560	458	PC-3p-177009_8	AATCTATCCTCAAATTCCTCAACC	24	Sc0003675	-	154157	154308	tgtttggttgaaagatttgaggacagatttgaaaaggaaaagggaaaagttaggtgaaatatgaataaaatatatctatatttcatctaattttacacatcttttctctttttctttccaAATCTCTCCTCAAATTCCTCAACCaaatatag	3'	New	gp4	(((((((((((..((((((((((.(((((((.((((((((((((((((((((((((((((((..(((.....)))..)))))))))))))..........))))))))))))))))).))))))).))))))))))..)))))))))))...	149	28.3	-68.5	1.6	8	6	0	0	0	0	8.23798	5.16611	0	0	0	0	low
561	459	PC-3p-106103_16	ATTCGAGCCATTCTGACTATGAAA	24	Sc0001120	-	355060	355183	ttcgtaactcgaatttgtatagtccgaatggctcgaatatatcaaaacgacgtcgttttacccccaaaacaacgtcattttgaaacATTCGAGCCATTCTGACTATGAAAattcggactaccaa	3'	New	gp4	...(((..((((((((..((((((.(((((((((((((...((((((.(((((.(((((......))))).))))).))))))...))))))))))))).))))))..))))))))..)))...	118	38.7	-54	1.1	9	6	4	0	0	3	9.26772	5.16611	4.2924	0	0	2.36482	low
562	460	PC-3p-141242_11	AATCCCTCCTCAAATCCCCAT	21	Sc0000271	-	637863	638014	tgtttggtaaggggatttggagatagatttggaaaaggaaaggaaaaaagtgtgtgaaactaggtgaaatataagtatgttttattcacatttcacttaccttttccatttttctttccaAATCCCTCCTCAAATCCCCTTaccaaacacaa	3'	New	gp4	(((((((((((((((((((..((..((((((((((..((((((((((((((((((((......(((((((((....))))))))))))))...)))))...)))))).))))..))))))))))..))..)))))))))))))))))))...	149	34.2	-69.2	1.3	0	0	3	0	0	12	0	0	3.2193	0	0	9.45929	low
563	461	PC-3p-58653_32	CTACCTTTTCCCTTTCCTTTC	21	Sc0001000	-	292777	292952	aaactttaatgttatatttggttgggagatttgggaagaaatttggaaaaagaaaaggaaaaggtgagtgaaactatgtgaaatgtaagtatattttattcacatttcacCTACCTTTTCCCTTTCCTTTTccaaatccattcccaaatcccccaaccaaatacagcgtaaagaga	3'	New	gp4	...((((.(((((.((((((((((((.((((((((((...((((((((((.((((.(((((((((..((((((....(((((((((....))))))))).....))))))..))))))))).)))).))))))))))...)))))))))).)))))))))))).)))))))))...	170	33.5	-82.6	1.4	0	3	5	3	7	14	0	2.58306	5.3655	3.89112	6.96422	11.0358	middle
564	462	PC-3p-72603_25	TTGGAGGGTAAAATGAAGGGA	21	xpSc0053643	+	94438	94642	gctattctgatttggatcaatgtgacctttgccatcacatgctgtctataatcaaacaaaaatctttattttaccccccaaaccctctgttcagggtctaattgagttttaacggatagtTTGGAGGGTAAAATGAAGGGAttccgttttattatagacggcaggtaatgacatgagtcacattgatcaaattgagaatagtttg	3'	New	gp4	(((((((((((((.((((((((((((...((.(((.((.(((((((((((((.((((.....((((((((((((((.((((((..((((((.((..((.....))..)).))))))..)))))).))))))))))))))......)))).))))))))))))).)).))).))...))))))))))))))))).))))))))...	202	37.1	-89.3	1.2	5	6	3	3	5	10	5.14874	5.16611	3.2193	3.89112	4.97444	7.88274	low
565	463	PC-3p-78176_23	TTCCGATCGAGGGGCTATCGAT	22	xfSc0004822	-	8641	8830	gcttgttgagtatttcatacttgcaaaaaatcacattaattggatatcggtattctcttgatcgaaacacatttttgtcaatggtaaatatactaaaaaaaaattattaacaaaaatgtgTTCCGATCAAGGGGCTATCGATatctaatcaacatgattttttgcaagaatgatatactcgacgagttct	3'	New	gp4	(((((((((((((.((((.((((((((((((((..((.((((((((((((((..((((((((((.(((((((((((((.(((..(.................)..))).))))))))))))).))))))))))..)))))))))))))).))..)))))))))))))).)))).)))))))))))))...	187	30	-90.7	1.6	6	4.5	1.5	0	1.5	2	6.17848	3.87458	1.60965	0	1.49233	1.57655	low
566	464	PC-3p-61545_30	TTTAGGAAGTCATCTTTGGC	20	Sc0005907	+	10745	10963	aggaagtgaggtcttgtatgcagatttagagtcttgtttggtagccaaggatgacttgcctaaatccaattttagggttgcgacatatgtaagcatatgtatatagataatcacgtggttTTTAGGAAGTCATCTTTGGCttttctgacagattctaatccttcatgctagaccttcacttccatggtacttccaatacgtcgatcatacgtcctagta	3'	New	gp4	.(((((((((((((.(((((.((..((((((((.(((..((.(((((((((((((((.((((((.(((........(((...(((((((....))))))).....))).......)))..)))))))))))))))))))))..))..)))))))))))..)).))))).)))))).))))))).(((.....)))..((((.......)))).......	182	39.3	-88.3	1	25	3	3	8	20	31	25.7437	2.58306	3.2193	10.3763	19.8978	24.4365	middle
567	465	PC-5p-44046_43	TTTTTGTGACCACAATTGCTC	21	Sc0000321	-	864574	864700	tttgaaacaatgctagagagtcacaaTTTTTGTGACCACAATGGCTCaaaactgtcaaaacaacgtcattttgacagttttgagctattgtgatcacaaaaattatggccctcaaacatttttctat	5'	New	gp4	...((((.((((...(((.((((.(((((((((((.((((((((((((((((((((((((........)))))))))))))))))))))))).))))))))))).)))).)))...))))))))...	121	33.9	-61	1.4	3	9	4	14	5	8	3.08924	7.74917	4.2924	18.1585	4.97444	6.30619	middle
568	466	PC-3p-118395_14	AAATTCCTCCTCAAATCCCTAACC	24	xfSc0000273	-	185481	185633	gtgtttggttgggagatttgaagagagatttgaaaagggaaatgaaaaagataggcgaaatacgaataaaacatgtttatattttacctaatttcacacacctttttcctttctcttttcAAATTCCTCCTCAAATCCCCAACCaaacatagc	3'	New	gp4	(((((((((((((.(((((((.(((..(((((((((((((((.(((((((.((((..(((((..((((.....))))..)))))..))))...........))))))).)))))))))))))))..))).))))))))))))))))))))...	150	34	-69.3	1.3	18	3	7	0	0	4	18.5354	2.58306	7.5117	0	0	3.1531	middle
569	467	PC-3p-20503_92	CGTTGGAAGTCTTTGAGGGTAT	22	xpSc0055766	+	21266	21375	tgatcagagaagtttctaattgtcctcaaaggcttccaatattccaagcattggtcttaacatggaaCGTTGGAAGTCTTTGAGGGTAAttgaaggcttactcttgagtg	3'	New	gp4	...(((((((((..(..((((..((((((((((((((((..(((((.....((.......)))))))..))))))))))))))))..))))..)..))).)))).))...	104	40	-47.7	1.1	21	39	30	11	47	47	21.6247	33.5797	32.193	14.2674	46.7598	37.0489	middle
570	468	PC-5p-70295_26	AAAATTGTGACACTTAGCTCCCTA	24	xpSc0053780	+	44947	45123	ttcacacaaaactcactttagtccctacacatcAAAATTGTGACACTTAGCTCCCTAaatgattacttctgttagcctcactattaacagaagggccaatgtgacatttgaccaaaagtgcaaggggttaagtgtcacaatttgatgtgtagggactaaagtgagattttgtgtaaa	5'	New	gp4	...(((((((((((((((((((((((((((((((((.((((((((((((((.((((.........((((((((((........))))))))))........((.(((((......)))))))))))))))))))))))))))))))))))))))))))))))))).))))))))...	171	37.9	-94.5	1.4	5	8	5	3	5	0	5.14874	6.88815	5.3655	3.89112	4.97444	0	low
571	469	PC-3p-102562_16	ATTTCACTTGCCTTTGCCTTTGCC	24	Sc0002850	-	132017	132150	tatttggatcattgaattggatagggatttgaaaagtgtaaaggaaaaggccagggaaatggagaaagaatttcacATTTCACTTGCCTTTGCCTTTGCCtttccctttccctttccttttctttttccaattc	3'	New	gp4	...(((((.....(((..(((.(((((.....((((.(((((((.((((((.((.((((((((((.....)))).)))))).)).)))))).))))))))))).....))))).)))..)))....)))))...	128	37.3	-52.2	1	8	0	3	0	0	5	8.23798	0	3.2193	0	0	3.94137	low
572	470	PC-3p-112953_14	ATTTCCTCTCCAAATCCCTCAACC	24	Sc0002519	-	51300	51447	tggttgggggatttaaagagggatttggaaatggaaagggaaaggaaaaagttaagtaaaatgtgaataaaatatacctacattttacctagtttcacactttttccctttccctttccaAATTCCTCTCCAAATCCCTCAACCaaac	3'	New	gp4	((((((((((((((..(((((((((((((((.((((((((((((((((...(((.((((((((((.............)))))))))).))))))).....)))))))))))).)))))))))))))))..))))))))))))))...	145	35.8	-71.8	1.4	8	3	0	3	0	0	8.23798	2.58306	0	3.89112	0	0	low
573	471	PC-3p-73839_24	TAGGGGGTCTTTGTGTAAATA	21	Sc0001718	-	89513	89623	actgggttatttacacaaagacacctaaactattgaggacgcttttatagtgtagggggtcgaaatgatacttctcaataattTAGGGGGTCTTTGTGTAAATAgcccttt	3'	New	gp4	...(((((((((((((((((((.((((((.(((((((.(((((.....)))))..((..((.....))..)).))))))).))))))..)))))))))))))))))))...	105	37.8	-50.6	1.2	0	3	3	4	4	10	0	2.58306	3.2193	5.18816	3.97955	7.88274	low
574	472	PC-3p-183878_8	AGAACCGAACCAATCCGAACCGTG	24	Sc0000594	+	76967	77029	agaaccgttaggattggttcggttcttggattttctcAGAACCGAACCAATCCGAACCGTGta	3'	New	gp4	...((.(((.((((((((((((((((..(.....)..)))))))))))))))).))).))...	57	46	-32.5	1.1	6	5	0	0	0	0	6.17848	4.30509	0	0	0	0	low
575	473	PC-3p-143988_11	ATTCGAGCTCTGATACCACTTGTT	24	Sc0000746	+	150541	150762	tttgagtgtgggtgtgtttttctgcttggtataatttccaaaaggtcttaggcgagatcatcgatccccaacaagtgatatcagagctcgggtgaaagaaaaacacattatttttccttcATTCGAGCTCTGATACCACTTGTTgggaatcggggatcctacccaagacctttcagaaattgtaccgagcagaaaaacacacccacactcaaggaaacacca	3'	New	gp4	((((((((((((((((((((((((((((((((((((((..(((((((((.((...((((..((((.(((((((((((.((((((((((((..((((.((((((.......)))))).))))..)))))))))))).))))))))))).))))..))))...)).)))))))))..)))))))))))))))))))))))))))))))))))))).........	213	43.2	-144.5	1.5	12	3	3	0	0	0	12.357	2.58306	3.2193	0	0	0	middle
576	474	PC-5p-167506_9	TGCCTCTGACATGACCGCTTG	21	Sc0000817	+	8759	8839	aaaagttcagttTGCCTCTAACATGACCGCTTGagtgaaaagatggcttgagcagtcatgtcagaggcaaactgaactccc	5'	New	gp4	...((((((((((((((((.(((((((.(((..(((.........)))..))).))))))).))))))))))))))))...	75	45.7	-48.3	1.3	3	0	0	0	3	9	3.08924	0	0	0	2.98467	7.09447	low
577	475	PC-3p-224010_6	AATCCTTCCTCAAATTCCTCAACC	24	Sc0003370	-	199536	199686	tgtttggttggaggatttggagagggatttggaaagggaaagggaaaaggtgtgtgaaactatgtgaaatttaggcatgttttatttatatttcacctatcttttccatttccctttccaAATCCTTCCTCAAATTCCTCAACCaaacaca	3'	New	gp4	((((((((((..(((((((..((((((((((((((((((((.(((((((((..((((((....(((((((........))))))).....))))))..))))))))).))))))))))))))))))))..)))))))..))))))))))..	149	37.1	-81.5	1.5	6.5	0	0	0	0	1.5	6.69336	0	0	0	0	1.18241	low
578	476	PC-3p-178175_8	AAATCCCTCTCCAAATCTCCTAAC	24	Sc0003155	+	39426	39579	gtgtttggttgggagatttagggagggatttggaaagggaaagagaaaaggtgtgtgaaattatgtgaaatatatacatattttatttacatttcacctaccttttctatttccctttctAAATCCCTCTCCAAATCTCCTAACcaaacacaac	3'	New	gp4	(((((((((((((((((((.((((((((((((((((((((((.(((((((((..(((((((...(((((((((....)))))))))....)))))))..))))))))).)))))))))))))))))))))).)))))))))))))))))))...	151	35.1	-95.3	1.8	8	5	0	0	0	3	8.23798	4.30509	0	0	0	2.36482	low
579	477	PC-5p-152875_10	AAAGACTTTCATGAAACTGATCAT	24	Sc0001390	-	192746	192894	ggaatcatgaAAAGACTTTCATGAAACTGATCATgaaaaatttatgacccttagattaccttgattaatgtgtggtgttttattttaagtgtaatccaagaatcataaatctttcatgattattttcatgaaaattttttcatgatgcg	5'	New	gp4	...((((((((((((.((((((((((.(((((((((((.((((((((..(((.(((((((((((.(((...........)))..))))).)))))).)))..)))))))).))))))))))).)))))))))).))))))))))))...	143	27.5	-57.1	1.4	8	5	0	0	0	0	8.23798	4.30509	0	0	0	0	low
580	478	PC-3p-71319_25	ATTCTTCTCTTGCACTGCCTCTTC	24	Sc0000427	-	652501	652627	caaagattgaagaggggagacggggacgagacagagcatgagatgggattttaattaacacatagaagttgtgttgttATTCTTCTCTTGCACTGCCTCTTCcctggctctcctctctctttctctt	3'	New	gp4	...(((..(((((((((((.((((((.(((.(((.(((.((((.(((((......(((((((.......)))))))..))))))))).))).))).))).)))))).))))))))).))..)))...	121	44.9	-56.5	1	12	21	3	8	0	10	12.357	18.0814	3.2193	10.3763	0	7.88274	middle
581	479	PC-3p-121225_13	AAATCCCTCTCCAAATTCTCCAAC	24	xfSc0000997	+	38460	38614	tgtgtttggtttgaggatttgaggagggatttgaaaacgaaatggaaaaagaaggtgaaatgtgaataaaatatacatttatttcacctaatttcatacaccttttcccttttcttttccAAATCCCTCTCCAAATTCTCCAACcaaacacagta	3'	New	gp4	(((((((((((.(((((((((..((((((((((((((.((((.((.(((((...((((((((((((..((((....))))..)))))...)))))))....))))).)).)))))))).))))))))))..))))))))).)))))))))))...	152	33.5	-65.5	1.3	10	5	3	0	0	4	10.2975	4.30509	3.2193	0	0	3.1531	middle
582	480	PC-3p-125841_13	AAATCCCTCCTCAAATCCCCAACC	24	Sc0000817	+	273059	273214	gtgtttggttgggggatttggaaagggatttagaaagagaaagggaaaaggtatgcgaaactaggtgaaatttaggcatgttttattcacatttcacctatcttttctatttttcgttctAAATCCCTCCTCAAATCCCCAACCaaacacagcata	3'	New	gp4	((((((((((((((.((((((..((((((((((((.((((((..((((((((..........(((((((((...................)))))))))))))))))..)))))).))))))))))))..))))))))))))))))))))......	150	37.8	-71.3	1.2	8	8	5	0	0	0	8.23798	6.88815	5.3655	0	0	0	low
583	481	PC-3p-159056_9	TTTTGAGCCATTTGAGCCACTGTT	24	Sc0003311	+	48590	48725	gcagagggccacaaaaacagtggctcaaatggctcaaaactgcgaaaatgacgtcgttttggggttaaaacctgccaaaacgacgtcgttttggcagTTTTGAGCCATTTGAGCCACTGTTtttgtggccctcaan	3'	New	gp4	...((((((((((((((((((((((((((((((((((((((((.(((((((((((((((((((((....)))..)))))))))))))))))).))))))))))))))))))))))))))))))))))))))))...	130	47.1	-112.5	1.8	11	3	0	0	0	3	11.3272	2.58306	0	0	0	2.36482	middle
584	482	PC-5p-68338_27	ATGTCTCACATGGTTGTGGAACCC	24	xfSc0002079	-	30587	30742	aaaaatgctagaggctccaaaaattctatcaaaagttttaccaaATGTCTCACATGGTTGTGGGACCCacatgggacccacattgtgtgggtcccacacccatgtgagacatttggtaaaacttttgatagaatatttggggtctctagcattact	5'	New	gp4	...((((((((((((((((((.(((((((((((((((((((((((((((((((((((.(((((((((((((..(........)..))))))))))))).))))))))))))))))))))))))))))))))))).))))))))))))))))))...	150	41	-117.4	1.8	18	7	4	0	0	14	18.5354	6.02713	4.2924	0	0	11.0358	middle
585	483	PC-3p-144227_11	ACCTTTTAGTGGTCGACTGGTTGG	24	xpSc0054511	+	14910	15059	caaccggttggtcgactggccggtccaccgactggtcgaccggtaagaggaattttttatttttttatttttttgaactgtttgaacctatttttttgaACCTTTTAGTGGTCGACTGGTTGGttgactggccggtcgaccggctggtcg	3'	New	gp4	..(((((..((((((((((((((((.((((((..(((((((..(((((((.............((((......))))...((..((........))..)))))))))..)))))))..)))))).))))))))))))))))..)))))..	146	47.3	-80.1	1.1	4	4	3	0	0	0	4.11899	3.44407	3.2193	0	0	0	low
586	484	PC-3p-149337_10	AATCCCTCCCTAAAACCCCCAACC	24	xfSc0001412	-	52889	53040	tgtttggttgggggatttggagagtgatttggaaacggaaatggaaaagataggtgaaatgtgaataaatcatgcctatatttcacataatttcacacacctttttcctttctctttccaAATCCCTCCCTAAAACCCCCAACCaaacacag	3'	New	gp4	((((((((((((((.(((((.(((.((((((((((..((((.(((((((....((((((((((((................)))))))...)))))....))))))).))))..)))))))))).))).))))).))))))))))))))...	149	38.8	-70.1	1.2	10	0	0	0	0	3	10.2975	0	0	0	0	2.36482	middle
587	485	PC-3p-3475_476	ATGGTAGAGAAGTGGTTTGGGACA	24	xfSc0000141	-	315430	315544	caccatttttttatgattctttatctcaaactatatctttaccatacgatgaatctatatttaaatgtATGGTAGAGAAGTGGTTTGGGACAtaggaacataaaaagtaatgttg	3'	New	gp4	((.((((((((((((.(((((..((((((((((..(((((((((((((.(((((....)))))..)))))))))))))..))))))))))...)))))))))))))..)))).))	115	28.7	-40.8	1.2	217	191	74	0	0	3	223.455	164.455	79.4094	0	0	2.36482	middle
588	486	PC-3p-183635_8	TTGAAACAGAGATAGGATTAT	21	Sc0004297	-	3029	3199	aaagattctttatctccaaataatcttatttctttgtttcaaattattcacaatcattaaatcatataagaattcaagatgtgaaaatctcaaaacatatctaatgattatgagtgatTTGAAACAGAGATAGGATTATttgagaacagaatccttaggcacaattgcaac	3'	New	gp4	...((((((...(((.((((((((((((..((((((((((((((((((((.(((((((...((......)).....(((((((............)))))))))))))).)))))))))))))))))))))))))))))))))))..)))))).....(((....)))...	150	26.3	-56.2	1.3	5	0	0	5	0	3	5.14874	0	0	6.4852	0	2.36482	low
589	487	PC-3p-111156_15	TCCTCAAATCCCCAACCAATC	21	Sc0001218	-	180231	180368	ggatgtgttcagttgggagatttggagagggatttggaaagggaaaaggaaaatgtgtgtgaaactaggttcacatttcacctaatttttcccttccccgtttcaaatctcTCCTCAAATCCCCAACCAAACacaaca	3'	New	gp4	...((((((..((((((.((((((..(((((((((((((.(((((..((((((((((((((((......))))))...)))...)))))))..)))))..)))))))))))))..))))))))))))..))))))...	132	42	-61.5	1.1	3	5	0	3	4	3	3.08924	4.30509	0	3.89112	3.97955	2.36482	low
590	488	PC-3p-133533_12	TCACTCCCTAAATCCCCAACC	21	Sc0002747	-	281257	281403	tttggttgggggatttggggagagatttggaaagggaaatggaaaaggtaggtggaatgggaataaatcatgcctatatttcacatagtttcacacacattttccctttccttttccaaaTCACTCCCTAAATCCCCAACCaaacac	3'	New	gp4	(((((((.((((((((((((((.((((((((((((((((.((((((.((..((((((((((((((...........)))))).)))...)))))..)).)))))).)))))))))))))))).)))))))))))))))))))))...	144	40.8	-75.5	1.3	3	4	0	0	0	5	3.08924	3.44407	0	0	0	3.94137	low
591	489	PC-3p-213710_6	AAAGGTTACAAATCTTTCATGACC	24	Sc0000661	-	181571	181699	aatttttttcatgaaaatgatcatgaaagatttataacccttagattatattgattagtatgtggtgctttattttaagtgtaatccAAAGGTTACAAATCTTTCATGATCattttcatgattgaactg	3'	New	gp4	...(((..(((((((((((((((((((((((((.(((((.((.(((((((((....(((((...)))))........))))))))).)).))))).)))))))))))))))))))))))))..)))...	123	25.6	-51.7	1.6	14	0	0	0	0	0	14.4165	0	0	0	0	0	middle
592	490	PC-3p-157088_9	AATCTCTCTCCCAATTCCCCAACC	24	Sc0003085	-	45452	45602	tgtttggttgggggatttgggaacagatttgtaaatgaaaagggaaaatgagggtgaaatatgaataaaatatatgtacatttcacatagtttcacatgccttttcccttttattttctaAATCTCTCTCCAAATTCCCCAACCaaacaca	3'	New	gp4	((((((((((((((((((((((..(((((((.((((((((.(((((((.....(((((((............(((((.......)))))))))))).....)))))))))))))))..))))))).)).))))))))))))))))))))..	149	33.8	-60.9	1.2	0	0	0	0	4	10	0	0	0	0	3.97955	7.88274	low
593	491	PC-3p-94776_18	TCTCTACCCAAATCTATGATC	21	Sc0000097	+	1298822	1298955	aggggatcatggatttgggtaggggtttgggaagtgaaaggaaaatgcgagggaaatgtgtatgaaatacatgctaacttttttctccatttttctcgccttttccaaaTCTCTACCCAAATCTATGATCcaaa	3'	New	gp4	...((((((((((((((((((((((((((((((((((..((((((((.(((..(((.(((((((.....)))))..)).)))..)))))))))))))))..))))))))))))))))))))))))))))))...	128	39.6	-71.9	1.4	12	6	0	0	4	5	12.357	5.16611	0	0	3.97955	3.94137	middle
594	492	PC-3p-57427_32	AATCTCTCCTCAAATTCCCCAACC	24	Sc0001977	+	135586	135738	gtgtttggttaggggatttgagaagagatttggaaagggaaaaagaaaaggtgtgtgaaactatgtgaaatataggtatattttattcatatttcacctaattttccattttcctttccaAATCTCTCCTCAAATTCCCCAACCaaacacagc	3'	New	gp4	((((((((((.(((((((((((.(((((((((((((((((((..(((((.....((((((.((((((((((((....))))))))..))))))))))....)))))..))))))))))))))))))).))))))))))).))))))))))...	150	34.6	-76.9	1.5	10	9	6	7	0	12	10.2975	7.74917	6.4386	9.07927	0	9.45929	middle
595	493	PC-3p-49131_38	TTTGCTGATTTGACGTGATGC	21	xfSc0000337	+	96147	96321	aatttgttagcaatgctcaaatgggtaaacttattggcacaccatcacatcagatcagcaaaacatgcccacacaatgatgctgcactgtgaggctgtactgtgtgtgcatgaTTTGCTGATTTGACGTGATGCtgtgctaagaagcctaatcatctgagcattgctaacaaccc	3'	New	gp4	...((((((((((((((((.(((..((..(((.((((((((.((((((.(((((((((((((.(((((.((((((.((..((..(.....)..))..)).)))))).))))).))))))))))))).)))))).)))))))).)))..))..))).))))))))))))))))...	169	43.4	-90.2	1.2	7	7	7	7	5	5	7.20823	6.02713	7.5117	9.07927	4.97444	3.94137	low
596	494	PC-3p-42453_45	TCTCTTCCCAAATCCCCCAT	20	Sc0000315	-	75197	75341	ttggttggggaatttaggaagggatttgaaaaaggaaatagaaaatataggtgaaatttgaataaaatatatctacatttcacttaatttcacacacgtttttcttttttcctttttaaaTCTCTTCCCAAATCCCCCATgcaaa	3'	New	gp4	(((..(((((.((((.((((((((((((((((.(((((.((((((.....((((((((((((................))))...))))))))......))))))..))))))))))))))))))))).)))).)))))..))).	144	29.7	-51	1.2	10	17	7	0	9	11	10.2975	14.6373	7.5117	0	8.954	8.67102	middle
597	495	PC-3p-157432_9	AGTCCTACACCCATGTGAGATATT	24	xpSc0055671	-	16010	16137	atataaatgttttatcaatatttccatcaaatgtcttatatgagtgtggaacacacaccatgtggatctcatgtaAGTCCTACACCCATGTGAGATATTtagtaaaaatattagtaaaatatttaaag	3'	New	gp4	...(((((((((((..(((((((..(..((((((((((((((.((((((.((......((((.......))))...)).)))))).))))))))))))))..)..)))))))..)))))))))))...	122	28.1	-39.3	1.1	7	6	0	0	0	0	7.20823	5.16611	0	0	0	0	low
598	496	PC-3p-32021_60	TTTTGACATTTTCGGACCATT	21	Sc0004427	+	112136	112311	ttggaaaggacaatgattggtgggcacaaattttatggctcaactgggccgaaaataccaaaatgacgtcattttgggtacaaaataattctaaaaatctcaaaacgacatcgTTTTGACATTTTCGGACCATTtgagccatagaatttgtggccaccaaacatttttcttttgga	3'	New	gp4	...(((((((.((((.(((((((.(((((((((((((((((((.(((.((((((((..((((((((.(((.(((((((....................))))))).))).))))))))..)))))))).))).))))))))))))))))))).))))))).)))).)))))))...	170	36.9	-84.9	1.3	10	16	3	5	12	14	10.2975	13.7763	3.2193	6.4852	11.9387	11.0358	middle
599	497	PC-5p-104974_16	AATAATTGAGAGTGTATTGAGACA	24	Sc0001561	-	390915	391079	ttgtattttaaaatttttacataatttAATAATTGAGAGTGTATTGAGACActgagagggtggaattttggatttcactcttgatttcagccatgtagactatatgtgagcatttgtctcaatacattttttattattgaattatgtgaaaattttaagataggt	5'	New	gp4	...((((((((((((((((((((((((((((((..((((((((((((((((....((((((((((((...)))))))))))).......((((..((.....))..)).))...))))))))))))))))..))))))))))))))))))))))))))))))...	159	26.7	-69.3	1.6	4	9	3	0	0	0	4.11899	7.74917	3.2193	0	0	0	low
600	498	PC-3p-98906_17	ATTTGAGCCATTTGAGTCACAGAA	24	xpSc0053857	+	8128	8281	atagagggtcctaatttctgtggctcaaatagttcgaatttgtcaaaacgacgtcgttttgagtacaaaacaacatcaaaattgccaaaacgacgtcgttttagcaaATTTGAGCCATTTGAGTCACAGAAattagggccctcaaacattttcc	3'	New	gp4	...(((((((((((((((((((((((((((.(((((((((((..(((((((((((((((((.(((.................))))))))))))))))))))..))))))))))).)))))))))))))))))))))))))))...........	140	38.3	-90.1	1.5	22	9	0	0	0	4	22.6544	7.74917	0	0	0	3.1531	middle
601	499	PC-3p-49271_38	AAAAATGTATTCCGATCGAGGGGC	24	Sc0002186	-	67296	67499	tgtagaactcgtcgagtatttaatacttgtaaaaaatccaattgatcggatattagtagcccgttgatcgaaatacatttttgttaacaatttgtttttaaaattatttttatcattgatAAAAATGTGTTCCGATCGAGGGGCtactaatattcgatcaatgtaattttttccaggcataaagtactaaacgaattctacata	3'	New	gp4	(((((((.((((..(((((((.((.((((.(((((((...((((((((((((((((((((((.(((((((.((((((((((((((((...........(((((....)))))...)))))))))))))))).))))))).))))))))))))))))))))))...))))))).)))).)).)))))))..)))).)))))))..	202	28.9	-89.2	1.5	6.5	8	2.5	0	0	2	6.69336	6.88815	2.68275	0	0	1.57655	low
602	500	PC-5p-132585_12	ATGTCTGACATGGGTGTAGGGTCC	24	Sc0000390	-	327147	327264	cactaaattttctaccaaataaatgaccaaATGTCTGACATGGGTGTGGGGTCCgtaattttgtaggccccactcccatgtgagacatttgatcatttatttggtagaaaatttgtaa	5'	New	gp4	...(((((((((((((((((((((((.(((((((((.(((((((.((((((((..((....))..)))))))).))))))).))))))))).)))))))))))))))))))))))...	112	37.3	-73.8	1.7	9	3	0	0	0	0	9.26772	2.58306	0	0	0	0	low
603	501	PC-3p-13233_139	CCTTTACTCTTTCCCTTTCCA	21	Sc0000660	+	325227	325317	aagggaaagggaaaaggaaaaggtgtgtggaactaagtgaaatgttgttatatctcatatttcacctaCCTTTACTCTTTCCCTTTCCAaa	3'	New	gp4	...(((((((((((..(.((((((..((((((....((((.((((....)))).)))).))))))..)))))).)..)))))))))))...	85	36.3	-35.9	1.1	11	11.5	12.5	18	13.5	19	11.3272	9.90171	13.4138	23.3467	13.431	14.9772	middle
604	502	PC-3p-6586_268	TATGAGAGGGTTGTGCATTTT	21	Sc0000821	-	664269	664415	attttaggaacacagagagttgtgtgcatagaatgcacaaccctctcacatgagagtgaggcctacacgtatggagtccatgttaggtccaccctcaTATGAGAGGGTTGTGCATTTTgcgcacataactctttgtgttcctaacaa	3'	New	gp4	...((((((((((((((((((((((((..(((((((((((((((((((.(((((.(((.((((((....(((((...))))).))))))))).))))).)))))))))))))))))))..))))))))))))))))))))))))...	141	44.9	-96.6	1.5	21	4	10	62	79	108	21.6247	3.44407	10.731	80.4164	78.5962	85.1336	middle
605	503	PC-3p-169142_8	AATCTCTCCCCAAATCTCTCAACC	24	Sc0000318	+	240347	240498	tgtttggttgagagatttgaagaaggatttggaaatggaaatggtagataaaatatgaataaaatatacttacaattcacatagtttcacacactttttccgtttccgtttctctttccaAATCTCTCCCCAAATCTCTCAACCgaacacaa	3'	New	gp4	(((((((((((((((((((..((..((((((((((..(((((((.((((......(((((..............)))))...(((.......)))......)))))))))))..))))))))))..))..)))))))))))))))))))...	149	33.6	-56.5	1.1	8	0	3	3	0	0	8.23798	0	3.2193	3.89112	0	0	low
606	504	PC-5p-248335_5	ACAACCCCCTTTGTGATTCACACC	24	Sc0004827	-	5993	6173	acagaaacagcaatgatagggaccccctttgtggaggacccccACAACCCCCTTTGTGATTCACACCattcatgatgtggaccccacacatacatgaatagaccccacacatcatgaatggtgtagatcagtaagggggttgtgagggtcctcacaaacggggtctaactcatttttcaaa	5'	New	gp4	...((((....(((((...(((((((.(((((.((((((((.((((((((((((..((((..(((((((((((((((((............................)))))))))))))))))..))))..)))))))))))).))))))))))))).)))))))...)))))))))...	175	48.1	-99.5	1.1	5	7	0	0	0	0	5.14874	6.02713	0	0	0	0	low
607	505	PC-3p-174693_8	ATTCGAGCCATTCGAGCCTGAGAA	24	Sc0000136	+	1010465	1010612	aaaatgtttggtggccacaatattcgcagctcaaatggctcgaattgaccaaaacgacatcgctttgtgttgttttgtgtccaaaacgacgtcgttttgctcaATTCGAGCCATTCGAGCCTGAGAAattcgggccctctatcatcgt	3'	New	gp4	...(((..(((.((((......(((.((((((.(((((((((((((((.(((((((((..........(((((((((....)))))))))))))))))).))))))))))))))).)))).)).))).....))))..))).)))...	142	45.3	-64	1	11	3	0	0	0	0	11.3272	2.58306	0	0	0	0	middle
608	506	PC-3p-215957_6	AATTCCTCTTTAAATCCTCCAACC	24	Sc0000654	-	492199	492351	gtgtttggttcggggatttggagagggatttagaaagaaaaaaggaaaaggtgtgtgaaactatgtaaaatgtaagtatattttattcacatttcatctacttttccatttctctttccaAATTCCTCCTTAAATCCTCCAACCaaacacagc	3'	New	gp4	((((((((((.(((((((((..(((((((((.((((((.(((.(((((((....((((((....(((((((((....))))))))).....))))))...))))))).))).)))))).)))))))))..))))))))).))))))))))...	150	34.6	-66.3	1.3	8	3	0	0	0	3	8.23798	2.58306	0	0	0	2.36482	low
609	507	PC-3p-11776_155	CCCCTATCTAAATCCATGATC	21	Sc0000109	+	986140	986285	tggatcgtggatttgagtagggatttaagaatggaaaggaaaaggctaggggaacggaattttctctttaatcttatatttcattcacgttttcctcaccttttactttccttttccaaaCCCCTATCTAAATTCATGATCcaaac	3'	New	gp4	(((((((((((((((..(((((.(((..(((.((((((.((((((..(((..((((((((......................)))).))))..)))..)))))).)))))).)))..))).)))))..)))))))))))))))...	143	36.3	-58.6	1.1	28	31	14	17	32	33	28.8329	26.6916	15.0234	22.0497	31.8364	26.013	middle
610	508	PC-3p-291457_4	CATCCCATTGTATCCAATCTGC	22	Sc0002603	+	314624	314852	agcagattggatacaatgggatggttacctttaactaatttaccacataaggcatatccccgctaaataatcagtccagtgttggggtatacctcatgtggtgaattggttaaaggtaacCATCCCATTGTATCCAATCTGCcaagcaacaatggattatattgagaaggtagatttacctttcttcccgtaacaattggttgattagcgaaatttgaataggcttgtt	3'	New	gp4	.(((((((((((((((((((((((((((((((((((((((((((((((.(((.(((((((((((..((.....))..))))..))))))).))).)))))))))))))))))))))))))))))))))))))))))))))))(((((..((((...((((...(((((((((....)))).)))))...))))..)))).(((.....)))...........)))))..	141	38.4	-111.7	1.3	8	7	0	0	0	3	8.23798	6.02713	0	0	0	2.36482	low
611	509	PC-3p-144104_11	AAATCCCTCTTCAGATCCTCCAAC	24	Sc0003471	-	64073	64226	gtgtttggttggggggtttggagagagatttgaaaagggaaagggaaaagttgtgtgaaactaggtaaaatataggcatattttattcacattccacctaccttttccattttcctttccAAATCCCTCTTCAAATCCTCCAACctaacacaac	3'	New	gp4	(((((.(((((((((((((((((((.((((((.(((((((((.(((((((..(((.(((.....(((((((((....))))))))).....))))))....))))))).))))))))).)))))).))))))))))))))))))).)))))...	151	39	-73.9	1.2	11	0	0	0	0	3	11.3272	0	0	0	0	2.36482	middle
612	510	PC-3p-44990_42	CTTTCCAAATCCCTCCTCGT	20	Sc0000177	-	691904	692066	tacattgtgtttaattgagggatttgggaagggatttaaaaaaaaaaagggaaaagatgtgtgaaactaggtaaaatttaggtatattttatttacatttcacctactttttttatttttCTTTCCAAATCCCTCCTCGAatcccccaatcaaatacaatata	3'	New	gp4	...(((((((((.((((.((((((((((.((((((((..(((.(((((..(((((((.((((((((.((..((((((........))))))..))..))))))..))))))))).))))).)))..)))))))).)))))))))).)))).)))))))))...	157	28.8	-53.2	1.1	8	3	10	0	6	15	8.23798	2.58306	10.731	0	5.96933	11.8241	middle
613	511	PC-3p-154140_10	AATTCCTCTCTAAATCCCTCCACC	24	Sc0000566	-	750162	750313	tgtttggttgaggaatttgaggagggatttggaaaggaaaatgaaaaaaataggtgaaatatgaataaaacacacccacatttcacctagtttcatatgctttttctctttcttttttcaAATTCCTCTCTAAATCCCTCCACCaaacacag	3'	New	gp4	((((((((.((((.(((((..(((((((((((((((((((..((((((..((((((((((.((.............)).))))))))))...........))))))..)))).)))))))))))))))..))))).)))).))))))))...	149	34.2	-57.6	1.1	10	0	0	0	0	0	10.2975	0	0	0	0	0	middle
614	512	PC-3p-160449_9	ATTTCGAGCCATTCGAGTCACAAA	24	Sc0000836	-	684353	684512	actgatgtttgagggccacaatttttgtggctcaaatggctcaaaattgttaaaacgacgtcgttttgacaatgttgaagttgttttgtactcaaaacgacgtcgttttaacaATTTCGAGCCATTTGAGTCACAAAaattgtgaccctcaatcattgtt	3'	New	gp4	...((((.(((((((.((((((((((((((((((((((((((.((((((((((((((((((((((((((((((......))))........)))))))))))))))))))))))))).)))))))))))))))))))))))))).))))))).))))...	154	36.9	-97.2	1.6	7.5	0	0	0	0	0	7.7231	0	0	0	0	0	low
615	513	PC-3p-180673_8	AAAAAATTGTGACCCTCTAACATT	24	Sc0000497	-	15538	15683	atgtttgagggtcacaatttttgtggccacaatagttcaaaactgtcaaaacgacgttgttttgagtgtaaaacatgttaaaacgacgttgttttgacagttttaagacattgtgactacAAAAAATTGTGACCCTCTAACATTat	3'	New	gp4	(((((.((((((((((((((((((((.((((((.(((.((((((((((((((((((((((((((((((.....))).)))))))))))))))))))))))))))..))))))))).))))))))).))))))))))).)))))...	143	33.6	-78.8	1.6	4	8	0	0	0	0	4.11899	6.88815	0	0	0	0	low
616	514	PC-3p-244495_5	ATAAAACATTTGGGGGTCTCTAGC	24	Sc0000334	-	843108	843251	aaaaatgttagaggtccaaatgttttactaaatgttctactaaatacctcacatgcatgtgagacctacatgagactcacatggtgtgagttccacacccatgtgaaatatttaATAAAACATTTGGAGGTCTCTAGCattact	3'	New	gp4	...((((((((((((((((((((((((.((((((((...........((((((....)))))).............((((((((((((.....)))).)))))))))))))))).)))))))))))))..)))))))))))...	138	35.4	-55.8	1.1	11	0	0	0	0	0	11.3272	0	0	0	0	0	middle
617	515	PC-3p-69_25219	TAAATGCGATCCCTTGGGAAT	21	Sc0000519	-	754025	754128	tgcaggtggagaactccaaagggatcgcattgatccaacgtttgattgatagcatggttttgttgattggaTAAATGCGATCCCTTGGGAATtttccatctata	3'	New	gp4	...((((((((((.(((.(((((((((((((.((((((...(..((.(((......)))..))..))))))).))))))))))))).))).))))))))))...	98	41.3	-47.6	1.1	6663	7979	8636	1268	1379	2171	6861.2	6870.07	9267.29	1644.65	1371.95	1711.34	high
618	516	PC-5p-203456_7	AAGTTAATTCTGGACATCCTAGGC	24	Sc0004877	-	90781	90979	taggcattaggccaaaccacgttaaattttttttattgttttgttttgtgtatggAAGTTAATTCTGGACATCCTAGGCagagtcttcagatcccagcaaatcttaggatcccgtctaggatgttcaaaataaactttcatgcacaaagaacccacacacacaaaaagacaaataatttaacgtgattcggcccaatgc	5'	New	gp4	...(((((.((((.((.(((((((((((.(((......((((((((((((((((((((((.(((.((((((((((((((...(((((.((((........)))).)))))...)))))))))))))).))).))))))))))))))))............))))))....))).))))))))))).)).)))).)))))	196	37.7	-77.6	1	4	1.5	0	0	0	0	4.11899	1.29153	0	0	0	0	low
619	517	PC-5p-179214_8	AAAAACATTTCAGTGGATTGGAAA	24	xpSc0055129	-	11333	11437	cacattAAAAACATTTCAGTGGATTGGAAActtcaatcacatgaaagagtgttgaaatgtttcatgtgattgaagtttccaatccactgaaatgcttttagtatt	5'	New	gp4	...(((((((.(((((((((((((((((((((((((((((((((((..((......)).))))))))))))))))))))))))))))))))))).)))))))...	99	31.4	-61.4	1.9	16	10	0	0	0	0	16.476	8.61018	0	0	0	0	middle
620	518	PC-3p-67219_27	TTAAACCATTGTGGCCACAAA	21	Sc0002486	-	308414	308550	atagagggtcacaatttttgtggtcacaatagtttaaaactgtcaaaacgacgtcattttgggtatgttttgcattcaaaatgaggtcgttttggcaattTTAAACCATTGTGGCTACAAAaattgtaatcctcaaa	3'	New	gp4	...((((((.((((((((((((((((((((.((((((((.((((((((((((.(((((((((..(((.....)))))))))))).)))))))))))).)))))))).)))))))))))))))))))).))))))...	131	33.6	-74.6	1.6	6	16	5	0	0	0	6.17848	13.7763	5.3655	0	0	0	middle
621	519	PC-3p-82655_21	AATCCTTCTCCAAATCCTCCAACC	24	Sc0001930	+	347764	347915	tgtttggttagaggatttgaggaggaatttgaaaagggaaatggaaaaggtaagtgaaatatgaataaaatatgtctatatttcacctagtttcacacactttttctctttccctttccaAATCCTTCTCCAAATCCTCCAACCaaacacag	3'	New	gp4	(((((((((.((((((((((((((((.((((.(((((((((..((((((((..(((((((.......((((((....))))))......)))))))..))))))))..))))))))).))))))))))).))))))))).)))))))))...	149	34.9	-67.9	1.3	5	9	0	0	3	4	5.14874	7.74917	0	0	2.98467	3.1531	low
622	520	PC-5p-66414_28	TTGTCATGAAAATCATCTGCA	21	Sc0000963	+	239308	239465	tatagggtcctgctacgttttatgaaaactgtcatgaaaaTTGTCATGAAAATCATCTGCAccgttggatcatgagacacatacctgatctaacggtgcagatggttttcatgacaattttcatgaaaattcttcatgacacctagcatttccctttt	5'	New	gp4	...((((...(((((.((.(((((((.....(((((((((((((((((((((((((((((((((((((((((.............)))))))))))))))))))))))))))))))))))))))))......))))))).)).)))))...))))...	152	37.3	-86.1	1.5	12.5	9	2.5	1.5	3	3	12.8718	7.74917	2.68275	1.94556	2.98467	2.36482	middle
623	521	PC-3p-147851_10	AATTCCTCTTCAAATCCCCCAACC	24	xpSc0053831	-	41991	42142	tgtttggttgaaggatttgaggagggatttggaaaggaaaatggaaaatgtaagtaaaatgtaaataaaatatacttatatttcacctaattttacacaacttttccattttcctttctaAATTCCTCTTCAAATCCCCCAACCaaacacag	3'	New	gp4	((((((((((..((((((((((((((((((((((((((((((((((((.((..(((((((.......((((((....))))))......)))))))...))))))))))))))))))))))))))))))))))))))..))))))))))...	149	30.9	-75.8	1.6	4	3	3	0	0	0	4.11899	2.58306	3.2193	0	0	0	low
624	522	PC-3p-140672_11	TTGAGAACCAGACCAGACCGTTAC	24	Sc0001413	+	284468	284583	tgattaggggtgtacacggtctggattggttcggttatgagaaaatccaagaatcaaactgatcctaacagttctgtgattTTGAGAACCAGACCAGACCGTTACacttgtaaaat	3'	New	gp4	...(((..((((((.(((((((((..((((((......((.....))..((((((((((((.......)))))...)))))))..))))))..)))))))))))))))..)))...	110	40.5	-41.5	0.9	8	3	0	0	0	0	8.23798	2.58306	0	0	0	0	low
625	523	PC-3p-93462_18	AATCTCTGCTCAAATCCTCCAACC	24	Sc0000432	-	862390	862541	tgtttggttgaaggatttgaggagagatttggaaagagaaatgaaaaaggtaggtaaaatgtgaataaaacatacttatatttcacctagtttcacacatctttttcatttttctttctaAATCTCTGCTCAAATCCTCCAACCaaatacag	3'	New	gp4	((((((((((.((((((((((.(((((((((((((((((((((((((((((((((.((((((((.((.....)).)))))))).))))..........))))))))))))))))))))))))))))).)))))))))).))))))))))...	149	31.6	-75.5	1.6	16	3	0	0	3	4	16.476	2.58306	0	0	2.98467	3.1531	middle
626	524	PC-3p-38560_50	ACCTACCTTTTTCCTTTCTCT	21	Sc0000492	+	534741	534926	tcccttgggttgtgtttggttgagtgatttgaggagaaatttggaaatagaaagggaaagggaaagggaaaatgtgtgtagaattaggtaaaatgtaaatatattttattcacatttttACCTACCTTTTTCCTTTCTCTttcaaaatctcttccaaaataccctaaccaaacacagcctcagtaa	3'	New	gp4	...((..(((((((((((((((.((..((((.(((((.((((.((((.((((((((((((((..((((((((((((..((((((((..((.....))..)).))))))..))))))))).))).)))))))))))))).)))).)))).)))))))))..))..)))))))))))))))..))...	180	33.9	-72.4	1.1	7	3	5	5	17	13	7.20823	2.58306	5.3655	6.4852	16.9131	10.2476	middle
627	525	PC-3p-52678_36	TGAAATACTCATCTGGGCAAG	21	Sc0001077	+	247570	247719	attcctctcctggcaaggcctcttgctcaaatgagtattccacaaattcatctgggaaagccgcaaatttcctttctgaagttattggattggttcttccaatgttgctTGAAATACTCATCTGGGCAAGatgctttgcatgggaggctt	3'	New	gp4	...((((((...(((((((.(((((((((.(((((((((.((....((((...((((((........))))))...))))..(((((((........))))))).....)).))))))))).))))))))).)))))))..))))))...	144	43.3	-61.5	0.9	22	56	20	0	0	0	22.6544	48.217	21.462	0	0	0	middle
628	526	PC-3p-309435_4	ATGTAGCACTCTAAAAAACTTTAG	24	Sc0002060	-	57297	57470	aaagtttcctagagtactatattgtgtggttgagatttactggcaagtcacatcagaaaaattgatgtgacttgccatcagaaaaattgatgtgacttgccagtaaatctcaaccacacaATGTAGCACTCTAGAAAACTTTAGgaaaaaatcattctagaggatccttgctca	3'	New	gp4	(((((((.(((((((.((((((((((((((((((((((((((((((((((((((((.....((((((........)))))).....)))))))))))))))))))))))))))))))))))))))).))))))).))))))).................(((........))).	142	36.2	-93.4	1.5	7	0	0	0	0	0	7.20823	0	0	0	0	0	low
629	527	PC-5p-56521_33	ACTGTCATGAAAACCATCTGCACC	24	xpSc0053843	+	10871	10975	acgtttcatgaaaACTGTCATGAAAACCATCTGCACCattggatcatgagacacatacctgatctaacggtgtagatggttttcatgacagttttcatgaaaatt	5'	New	gp4	...((((((((((((((((((((((((((((((((((.((((((((.............)))))))).))))))))))))))))))))))))))))))))))...	99	37.1	-65	1.7	6.5	7	0	4	0	3	6.69336	6.02713	0	5.18816	0	2.36482	low
630	528	PC-5p-65607_28	TAAAACTAGAGGGACCAAAGT	21	Sc0001512	-	448927	449081	aatgaaaaagaccatgtgTAAAACTAGAGGGACCAAAGTaaaattcaaaacaaacaaggaccaccagtgcaatctattcattacattagtggcccgtatagtttatcttgaattccactttgatccttctagttttgctcgtgattttttttttt	5'	New	gp4	...((((((((.((((.(((((((((((((((.((((((..(((((((...((((..((.((((.((((.(((......))).)))).)))).)).....))))...)))))))..)))))).))))))))))))))).)))).))))))))...	149	33.5	-55.8	1.1	7	3	5	5	4	4	7.20823	2.58306	5.3655	6.4852	3.97955	3.1531	low
631	529	PC-5p-242887_5	TCGGACATCGTTAATCCTTTCG	22	Sc0000743	-	153479	153644	acatacttgtaaaaattaagttaaTCGGACATCGTTAATCCTTTCGtccacttacatttgtattcattttaatactttaaatcacaatgtcatttattttttaagatacaaatgtgagtggatgaaagagttaacgatattcgattaacttaattttttacaggta	5'	New	gp4	...((((((((((((((((((((((((((.((((((((..((((((((((((((((((((((((....((((.....(((((.((...)).)))))....))))))))))))))))))))))))))))..)))))))).))))))))))))))))))).)))))))	163	25.9	-75.1	1.7	1.5	9.5	0	0	0	0	1.54462	8.17967	0	0	0	0	low
632	530	PC-3p-116510_14	AATCTCTCCTCAAATTCTCCAACC	24	Sc0002531	+	256731	256883	gtatttggttggagatttgtggagggatttggaaatggaaagagaaaatgtgtatgaaattagatgaaatataagtatgttttattaacatttcacctacttttcatattttcctttccaAATCTCTCCTCAAATTCTCCAACCaaacacatt	3'	New	gp4	((.((((((((((((((((.(((((((((((((((.((((((.(((((.(((..((((((..((((((((((....))))))))))...))))))..))))))))...))))))))))))))))))))).))))).))))))))))).))...	150	30.7	-68.6	1.5	14	7	0	0	0	0	14.4165	6.02713	0	0	0	0	middle
633	531	PC-3p-123413_13	ATTTGACCCATAGAATTTGTAACC	24	Sc0004278	-	107524	107680	aatgtttggtggccacaaattctgtggctcaagtggtccgaaaatgtcaaaacgacatcgttttagcatttttaaaattgttttgtacccaaaacgacgtcattctgatatttttggactATTTGACCCATAGAATTTGTAACCaccaatcattgtc	3'	New	gp4	((((.(((((((..(((((((((((((.(((((((((((((((((((((.((.(((.(((((((.(((...............)))....))))))).))).)).))))))))))))))))))))).)))))))))))))..))))))).))))...	154	36.3	-71.8	1.3	7	0	0	0	6	3	7.20823	0	0	0	5.96933	2.36482	low
634	532	PC-3p-105853_16	CTGTGTCCGGTTTTGTGTTCT	21	Sc0002006	+	190982	191081	tatgcacacaaatggaacacatagcgagacacaagcactcacgagtctatgggcccttgttagtgtCTGTGTCCGGTTTTGTGTTCTatttctgtgtttt	3'	New	gp4	...(((((.((((((((((((.(((..((((((..((((.(((((((....)))..)))).))))..))))))..))).)))))))))))).)))))...	94	44	-44.5	1	7	11	6	0	4	0	7.20823	9.4712	6.4386	0	3.97955	0	low
635	533	PC-5p-129531_12	GAAAAATCACCTTTGGCGACTAAC	24	Sc0002792	-	129	196	caaGAAAAATCACCTTTGGCGACTAAAaaaaaagtccatttttagtcgccaaaagtcgactttttagt	5'	New	gp4	...(((((.((((.(((((((((((((((.........))))))))))))))).)).)).)))))...	62	33.8	-23.1	1	7	5	0	0	0	0	7.20823	4.30509	0	0	0	0	low
636	534	PC-5p-67501_27	TAAAAAAGAAAAGGCAACAAG	21	xpSc0054343	-	13157	13307	actgtgtttgataggagaattttgaaagtgattTAAAAAAGAAAAGGCAAAAAGggtgaaattaaataaaatataactatattttattcatatttcacctgtttttccttctcttttttaatttctttttaaatctccaaccaaacacaac	5'	New	gp4	..((((((((...(((((..((((((((..(.((((((((((.((((.((((..((((((((..((((((((((....))))))))))...))))))))..)))).)))).)))))))))).)..)))))))))))))...))))))))..	147	24.5	-53.8	1.5	0	21	6	0	0	0	0	18.0814	6.4386	0	0	0	middle
637	535	PC-3p-166817_9	ATTTCTCTTTTCAAATTCCTCTCC	24	xfSc0001507	-	25430	25607	tgccttaatactgtgtttggttgggggatttggggagggatttggaaagggaaaaggaaaatgtgtgtgaaactagatgaaatatagacatgttttattcacatttcacctaccttttccATTTCTCTTTTCAAATTCCTCCCCaaatctctcaaccaaacacagcataagagtatct	3'	New	gp4	(((((((...((((((((((((((((((((((((((((((((((((((((((((.((((((.((..((((((...((((((((((....))))))))))....))))))..)).)))))).))))))))))))))))))))))))))))))))))))))))))))..)))).)))...	175	37.6	-98.1	1.5	8	0	0	0	0	4	8.23798	0	0	0	0	3.1531	low
638	536	PC-5p-191094_7	ATTCCTCCTTGCAACGGCTGAAAT	24	Sc0001316	-	76492	76624	acctgcactatgagtccggatttcctctttgcaATTCCTCCTTACAACGGCTGAAATcagttgttacaatatccaactgatctcagccgttgcaagaagaaattgcaaggaagagatcctaactcctgcacta	5'	New	gp4	...((((....((((..(((((((.(((((((((((.((.(((.((((((((((.((((((((..........)))))))).)))))))))).))).)).))))))))))).)))))))..)))).))))...	127	43.6	-63.8	1.1	10	0	0	0	0	0	10.2975	0	0	0	0	0	middle
639	537	PC-5p-21482_88	TCAAGTAGCTATGGAGGATTT	21	xfSc0001347	-	1946	2105	taggtgaaaagaaggtcaaTCAAGTAGCTATGGAGGATTTtttgtgtttattcgcagaaattatgcctattaaaagaatatgtatggtgtagtcagggtatagttttcgggacgaaatgcagaaaatcctcaatagctacttgatctgcctcattttcac	5'	New	gp4	...(((((((..((((..(((((((((((((.((((((((((((..(((..((...((((((((((((((((.....((....))....))))..))))))))))))...))..)))..)))))))))))).)))))))))))))..))))..)))))))	157	36.2	-65.6	1.1	0	6	4	27	28	33	0	5.16611	4.2924	35.0201	27.8569	26.013	middle
640	538	PC-3p-194135_7	ATTCGAGCCACTAAATTTCGGGCC	24	xfSc0000238	+	195858	196024	tcattattgataagaaaaatgtttgagggtcacaaaattagtggctcaaatggctcgaaactgtcaaaacgacgtcgttttgcgcccaaaacgacgtcgttttgacagtttcgagtcATTCGAGCCACTAAATTTCGGGCCaccaaccattgctgtattgataaacc	3'	New	gp4	...((((..(((.....((((.(((..((((..(((.((((((((((.((((((((((((((((((((((((((((((((((....)))))))))))))))))))))))))))))))))).)))))))))).)))..))))..))).))))....)))..))))...	161	41.9	-93.6	1.3	10	0	0	0	0	0	10.2975	0	0	0	0	0	middle
641	539	PC-5p-92192_19	CCCTATGTACCAAATCACTCA	21	Sc0000082	-	71644	71792	ccaaggattccctctctccaaaaattgatgtCCCTATGTCCCAAATCACTCAccaccattggatatgtcttgggattctcaaatgatccaacggttgtgagtgatttggaacaagggaacagggattttgggaaacaggggatccttgc	5'	New	gp4	.((((((((((((...(((.((((((..(((((((.(((.(((((((((((((.(((.((((((.....(((((...)))))...)))))).))).))))))))))))).)))))))).))..)))))).)))...)))))))))))).	147	45.6	-75.6	1.1	0	4	3	3	3	6	0	3.44407	3.2193	3.89112	2.98467	4.72964	low
642	540	PC-5p-81642_22	ACAACCCCCTTTGGATCTCCAC	22	Sc0000375	+	201356	201522	caatgattgagacttcctttttttggagacccccACAACCCCCTTTGGATCTCCACcattgacggtgtgagttccacacatacatgaatgggtcctacacatacatcaatggtagagatccaaagggggttgtgggggtctctaaaaaatgggggtctcaagcaatt	5'	New	gp4	...((.(((((((..((.(((((((((((((((((((((((((((((((((((.((((((((..(((((((.((((..((....))..))))..)).)))))...)))))))).))))))))))))))))))))))))))))))))))).))..))))))).))...	161	46.7	-110.2	1.4	0	0	0	3	10	9	0	0	0	3.89112	9.94888	7.09447	low
643	541	PC-5p-63459_29	ATAGTAAGGGGACACATGATCACT	24	Sc0000603	-	496604	496679	ttaATAGTAAGGGGACACATGATCACTttgtcttttatttttcagacaaaatgatcatgtgttttcttattattta	5'	New	gp4	..(((((((((..((((((((((((.(((((((..........))))))).))))))))))))..)))))))))..	72	26.3	-36.7	1.8	20	21	8	0	0	3	20.5949	18.0814	8.5848	0	0	2.36482	middle
644	542	PC-3p-12413_148	AATCGCTTCTTAAATCCCCCAACC	24	xfSc0001653	-	34740	34897	atgctttgtttggttgggagatttgaggagggatttgtaaatggaaatagaaaaagtaggtgaaatgtgaataaaacatatctatatttcatctagtttcacacacatttttcctttccaAATCGCTTCTTAAATCCCCCAACCaaacacagcgttaa	3'	New	gp4	(((((.((((((((((((.(((((((((((.((((((.(((.(((((.....(((.((((((((((((..(((.....)))..)))))))))))).)))..........)))))))).)))))).))))))))))).)))))))))))).)))))...	155	34.2	-67.8	1.3	51	43	21	7	5	29	52.5171	37.0238	22.5351	9.07927	4.97444	22.86	middle
645	543	PC-3p-102390_16	AGCATTAAATCTCACCCATACAAC	24	Sc0000871	+	406823	406984	gaaggatcctctagagtttttttttcttaaagtttcctagagtggtgtgttATATGGTTGAGATTTAATGACAAGtcacatcaattttttAGCATTAAATCTCACCCATACAACacaccactttagaaaattttaggaaaaaaaaactctagaggatccttg	3'	New	gp4	.((((((((((((((((((((((((((((((((((.(((((((((((((((.(((((.((((((((((((..(((............)))..)))))))))))).))))).))))))))))))))).)))))))))))))))))))))))))))))))))).	160	32.1	-95.2	1.8	10	3	0	0	0	3	10.2975	2.58306	0	0	0	2.36482	middle
646	544	PC-5p-59028_32	TAGGGCATATGTTAAGAGAGC	21	Sc0000094	-	202876	203042	ttttgtatataggtcttgttaatgtgtgccctTAGGGCATATGTTAAGAGAGCttaatagtattgtaccttatttattgcattcactctcatgtgcaatgtacaacacttttaagcttcttaacatgtgccctaagggagcacatcaataaattcctttgtatataa	5'	New	gp4	...((((((.(((..(((((.(((((..(((((((((((((((((((((.(((((((.(((.((((((.......(((((((..........))))))))))))).))).))))))))))))))))))))))))))))..))))).)))))...))).))))))...	161	33.5	-77.6	1.4	4	9	8	4	7	3	4.11899	7.74917	8.5848	5.18816	6.96422	2.36482	low
647	545	PC-3p-122158_13	AAATCCCTCCACAAATCCCCAACC	24	Sc0002531	-	256617	256769	gtgtttggttggagaatttgaggagagatttggaaaggaaaatatgaaaagtaggtgaaatgttaataaaacatacttatatttcatctaatttcatacacattttctctttccatttccAAATCCCTCCACAAATCTCCAACCaaatacaac	3'	New	gp4	(((((((((((((((.((((.((((.(((((((((((((((.(((((((..((((((((((((...............)))))))))))).)))))))...........))))).)))))))))).)))).)))))))))))))))))))...	150	31.4	-66.4	1.4	3	5	0	0	0	5	3.08924	4.30509	0	0	0	3.94137	low
648	546	PC-3p-141526_11	AATTCCTTTCCAAATCCCCCAACC	24	Sc0000034	+	1115292	1115437	gttgggagatttgggaagggatttggagagggaaagagaaaggagaaaggtgcatgaaactaggtgaaatgtaaatatattttattcacattttaccttccttttcccttttcattttcaAATTCCTTTCCAAATCCCCCAACCaa	3'	New	gp4	((((((.((((((((((((((((((((((.((((((.((((((.((..(((.......))).((((((((((.((((.....)))).)))))))))).)))))))).)))))).)))))))))))))))))))))).))))))...	143	37	-68	1.3	3	5	0	0	0	3	3.08924	4.30509	0	0	0	2.36482	low
649	547	PC-3p-26992_70	TGAGCCATTTAAGCCACTGAT	21	Sc0001876	-	431037	431117	nnnagtggctcaaatggctcaaaactgccaaaacgacgtcgtttgtcgttttggcagtttTGAGCCATTTAAGCCACTGAT	3'	New	gp4	...(((((((.(((((((((((((((((((((((((((.....))))))))))))))))))))))))))).)))))))...	75	43.2	-58.7	1.7	5	5	4	9	13	34	5.14874	4.30509	4.2924	11.6734	12.9335	26.8013	middle
650	548	PC-3p-86213_20	AATCCCTCTCTAAATTCCCCAACC	24	xfSc0001427	+	21732	21883	tgtttggttggaggatttggaggggtatttggaaaggaaaatagaaaaggtaggtgaaatgtgaataaaaaatgtctatatttcacctagtttcacacatcttttccctttccctttccaAATCCCTCTCTAAATTCCCCAACCaaacacag	3'	New	gp4	(((((((((((.(((((((((((((.(((((((((((.(((..(((((((((((((((((((..(((.....)))..)))))))))))..........))))))))..))).))))))))))).))))))))))))).)))))))))))...	149	37.5	-73.7	1.3	7	8	0	6	4	3	7.20823	6.88815	0	7.78224	3.97955	2.36482	low
651	549	PC-3p-153527_10	AATCCCTCCCCAAATCCCCAT	21	Sc0004125	-	110621	110772	tgtttggttgagggatttgaggagggatttggataggaaaatggaaaaggtaggtgaaatgtgaaaaaaatatacctacatttcacatagtttcacacaccttttccctttctctttctaAATCCCTCCCCAAATCCCCCTaaccaaacaca	3'	New	gp4	((((((((((.((((((((.(((((((((((((.((..(((.(((((((((..(((((((((((((..............))))))))...)))))..))))))))).)))..)).))))))))))))).))))))))..))))))))))..	150	38.8	-77.9	1.3	3	3	0	0	3	7	3.08924	2.58306	0	0	2.98467	5.51792	low
652	550	PC-5p-300395_4	TAGCCCATTCTTCTTGCAGACT	22	Sc0000743	-	438196	438316	cacacgtggtggctccagtatcaaggatggcattgactgagaatTAGCCCATTCTTCTTACAGACTtcaatcatcacatggattgaagtctgtaagaagaatgggctaattctcagtccaa	5'	New	gp4	(((.....)))(((((........)))..))...((((((((((((((((((((((((((((((((((((((........))))))))))))))))))))))))))))))))))))))...	84	43	-71.2	1.4	3	4	0	0	0	0	3.08924	3.44407	0	0	0	0	low
653	551	PC-3p-53444_35	AAATGTGCGGGTTCATAGATA	21	xfSc0000028	+	134482	134630	tccctcgtatattaacccgtacgtagtgaccccctcaactataaaaactgtacaaatgacccccttctgaaggtagtatggaaagggtgaaagtgatacattttgtagttgaatgggtcaAAATGTGCGGGTTCATAGATGaggggggt	3'	New	gp4	((((((((.(((.(((((((((((..((((((..((((((((((((..((((((......(((.((((...........)))).)))......)).))))))))))))))))..))))))..))))))))))).))).))))))))...	146	43.6	-66.3	1	10	3	0	7	4	15	10.2975	2.58306	0	9.07927	3.97955	11.8241	middle
654	552	PC-3p-62669_29	AATCTCTCCTCAAATCTTCCAACC	24	Sc0003088	+	179088	179232	ttgggggatttggggagggatttgaaaaagggaaatggaaagggaaaaaatgtgtgaaactaggtgaaatgtgggtatattttattcacatttcacctaacttttcccttttcctttccaAATCTCTCCTCAAATCTTCCAACCa	3'	New	gp4	((((..((((((((((((((((((..(((((((((.(((((((........((.....)).((((((((((((..((.....))..))))))))))))..))))))).))))))))).))))))))))))))))))..))))...	142	37.9	-75.7	1.4	29	8	4	0	0	9	29.8627	6.88815	4.2924	0	0	7.09447	middle
655	553	PC-5p-104350_16	AATAATCGTGAAAGCTTTGTGACC	24	Sc0000830	-	601276	601424	agtatcatgaaaaacctttcataaaAATAATCGTGAAAGTTTTGTGACCcttggattacacttagaataaagtacgacatactaatcaaggtaatccaaggattataaatctttcatgatcattttcataaaaaaagtttcatgatccc	5'	New	gp4	...(((((((((....(((.((.(((((.((((((((((.(((((((.(((((((((((.(((.((....((((.....))))..)))))))))))))))).))))))).)))))))))).))))).)).)))....)))))))))...	143	28.9	-49.6	1.2	6	7	3	0	0	0	6.17848	6.02713	3.2193	0	0	0	low
656	554	PC-5p-176124_8	ATATGCACACACTATATCCCCTCT	24	Sc0001944	+	185442	185572	ttaggggagcttttATATGCACACACTATATCCCCTCTtcccgcacacttaatgagagaatgtgttgggtagttgtgtgtgaaggatgtgtatagagagagagtggtgtgtgtaaatagatgctccccaac	5'	New	gp4	...(((((((.(((((.((((((((((((.((..((((.(((((((((((.....)))..)))).))))....((((..(.......)..)))).)))).)))))))))))))).))))).)))))))...	125	44.3	-51	0.9	8	0	3	0	0	0	8.23798	0	3.2193	0	0	0	low
657	555	PC-3p-147888_10	AAATCCCTCTTCAAATCTCTCAAC	24	Sc0000512	+	399367	399521	tgtgtttggtttggggatttagggagggatttagaaaggaaaagggaaaaggtgtgtgaaactatgtgaaatgtaggtatatttttttcatatttcacctacctttttcattccctttctAAATCCCTCTTCAAATCTCTCAACcaaacacaaca	3'	New	gp4	(((((((((((..(((((((..(((((((((((((((((.....(((((((((..((((((.((((.(((((((....)))))))...))))))))))..)))))))))....)))))))))))))))))..)))))))..)))))))))))...	152	35.5	-77.5	1.4	6	4	0	0	0	0	6.17848	3.44407	0	0	0	0	low
658	556	PC-3p-140954_11	AATCCCTCGCCAAATCCTTCAACC	24	xfSc0000003	-	76693	76845	tacgttgtgtttggttggaggatttgaagagggatttggaaagggaaagggaaaagtttggtgaaatgtgaataaaatatacctacatttcacacacctttttcttttctcttttcaAATCCCTCCCCAAATCCTTCAACCaaacacagcatt	3'	New	gp4	...(((((((((((((((((((((((..((((((((((((((((((((((((((((....((((((((((.............))))))))))....))))))))))))))))))))))))))))..)))))))))))))))))))))))...	147	37.3	-91.1	1.6	7	6	0	0	0	4	7.20823	5.16611	0	0	0	3.1531	low
659	557	PC-3p-109148_15	AATCTCTTCCTAAATCCTCCAACC	24	Sc0003546	+	168095	168231	taagcctgtgtttcgttgggggatttggaaagagaaaggaaaaaatgtgtaaactaggtaccctttccctttccctttcccttttctttttcctttccaAATCTCTTCCTAAATCCTCCAACCaaatacagcgtaaa	3'	New	gp4	...((((((((((.((((((((((((((.(((((((((((((((..((....))..((........))..................)))))))))......)))))).)))))))))))))).)))))))).))...	131	39.4	-46.8	0.9	17	4	0	0	0	6	17.5057	3.44407	0	0	0	4.72964	middle
660	558	PC-5p-91997_19	AACTCCTTCTGGATCTCAACCATT	24	Sc0004313	-	49954	50043	actcccacAACTCCTTTTGGATCTCAACCATTgatggtgtggaccccacacatacatcaatggttgagatccaaagagggttgtgggcag	5'	New	gp4	.((((((((((((..(((((((((((((((((((((((((((...))))))...)))))))))))))))))))))..)))))))))).))	89	48.9	-61.3	1.4	2	5.5	3	0	0	2	2.05949	4.7356	3.2193	0	0	1.57655	low
661	559	PC-3p-150021_10	AATCCCTTTCTAAATCCCTCAACC	24	Sc0003267	-	179691	179842	tgtttggttgagggatttggggaggaatttggaaagggaaagggaaaaggtgtgtgaaactatgtgaaatataggcatgatttattcacatttcacatacattttccatttccctttccaAATCCCTTTCTAAATCCCCCAACCaaacacag	3'	New	gp4	((((((((((.(((((((((..(((.(((((((((((((((.((((((.(((((((((...(((((((................)))))))))))))))).)))))).))))))))))))))).)))..))))))))).))))))))))...	149	38.8	-85	1.4	7	10	0	0	0	5	7.20823	8.61018	0	0	0	3.94137	low
662	560	PC-5p-19971_94	ACAACCCCCTTTGTGATCCACACC	24	xpSc0057617	+	10279	10448	agcaatgataggaatcccctttgtggaggacccccACAACCCCCTTTGTGATCCACACCattcatgatgtggaccccacacatacatgagtggaccccacacatcatgaatggtgtagattagtgagggggttgtggggtcctccacaaaagggtgtctaactcattttt	5'	New	gp4	...(((((((((...(((.(((((((((((.(((((((((((((((..(((((.(((((((((((((((((....((((.((....)).))))......))))))))))))))))).)))))..)))))))))))))))))))))))))).)))..))))..)))))...	164	49.4	-103.7	1.2	17	7	4.5	1.5	5.5	11.5	17.5057	6.02713	4.82895	1.94556	5.47189	9.06515	middle
663	561	PC-5p-81077_22	AACCCCCTTACTGATCTACACCAT	24	xfSc0013361	+	814	995	aaaaagaaaaatgagtcagaccccctttgtggaggtcccccacAACCCCCTTACTGATCTACACCATtcatgatgtgtggggctcactcatatatgtgcgggatccacatcatgaatggtgtggatcacaaagggggttgtgggggtcctccataaagggggtctctatcattgttgttaaa	5'	New	gp4	...((.((.(((((...((((((((((((((((((.((((((((((((((((..(((((((((((((((((((((((.((..(((((........))).))..)))))))))))))))))))))))))..)))))))))))))))).))))))))))))))))))...))))).)).))...	176	47.8	-124.7	1.4	12	4	4	0	0	6	12.357	3.44407	4.2924	0	0	4.72964	middle
664	562	PC-5p-151334_10	ATCATTCAACACTTGATTCAAATG	24	xpSc0053276	-	142078	142259	gtacatcttgggggaagatcctttccagttccaacacttactttatacaaccATCATTCAACACTTGATTCAAATGtcacaattcaatagctagtcatcatcatttgtggtatttggataaaatgtcggatgatgattgtataaagaaaagtgttagaagggatccagatcccatcttgaca	5'	New	gp4	((.((...(((((...(((((((((.......(((((((.((((((((((.((((((((.(((.((.((((((((..(((((......................)))))..)))))))).)).))).)))))))).))))))))))..))))))).)))))))))....)))))...)))).	181	36.3	-63.1	1	3.5	2	1.5	0	0	1.5	3.60411	1.72204	1.60965	0	0	1.18241	low
665	563	PC-3p-70854_26	ATTTGTCTTTCCAAATCCCTCCCC	24	Sc0005919	-	52879	53060	ttttctttatggtgtgtttggttgggggatttgggaagtgatttggaatgagaaagggaaagtgtgtgaaactatgtgaaatatatacatattttattcacatttcacctaccttttccATTTCTCTTTCCAAATCCCTCCCCaaatccctaaatccctccaccaaacacagcaaaggatta	3'	New	gp4	...(((((.((.((((((((((.((((((((((((.((.(((((((((.(((((((((((((.((((((((....(((((((((....))))))))).....))))))..))))))))).)))))).))))))))).)).)))))))))).........)))))))))))).)))))))...	176	37.4	-79.3	1.2	7	9	6	0	0	4	7.20823	7.74917	6.4386	0	0	3.1531	low
666	564	PC-3p-124156_13	GTTTCGAGCCATTCGAGTCACAGA	24	Sc0000720	+	548828	548957	aagggctacaaattctgtggcttaaatggcccgaaactaccaaaacgacgtcgttttacgtcgttttgcattcaaaacgacgtcgttttaagtGTTTCGAGCCATTCGAGTCACAGAatttgtggccacc	3'	New	gp4	...(((((((((((((((((((..((((((.((((((....((((((((((((((((..((.(.....)))..))))))))))))))))....)))))).))))))..)))))))))))))))))))...	124	44.6	-73.8	1.3	20.5	11	0	0	0	0	21.1098	9.4712	0	0	0	0	middle
667	565	PC-3p-32594_59	ATTCTTCCATCACCATTTTCT	21	Sc0000148	-	1238880	1239009	gtcgaaaatggtgatagaagaattgaaaaaactgaaaagtactcctggtgctaagaaggctgaccgggaaaaaagagtactcttcagtttcttcaATTCTTCCATCACCATTTTCTcaaccgtgtcaatt	3'	New	gp4	...((((((((((((.(((((((((((.((((((((.(((((((((((((((.....)))..))))))).......))))).)))))))).))))))))))).))))))))))))...............	112	38.5	-58.4	1.2	42	38	28	12	15	30	43.2494	32.7187	30.0468	15.5645	14.9233	23.6482	middle
668	566	PC-5p-145303_10	ATTTGGTTGAGAGATTTGAGGAGA	24	Sc0000151	+	827465	827614	aaattgtATTTGGTTGAGAGATTTGAGGAGAaatttgaaaaaggaaagagaaaaagtgtgaaattaagatatattttattcatattttatctatttttttttctttctatttctaaatttctttttaaactttctaactaaacacaacat	5'	New	gp4	...((((.((((((((((((.(((((..((((((((((((..((((((((((((((.(((((((...((((.....))))...)))))))....)))))))))))))).)))).))))))))..)))))))))).))))))).))))...	144	20.7	-43.4	1.4	6	4	0	0	0	0	6.17848	3.44407	0	0	0	0	low
669	567	PC-3p-144945_10	AATCCCTCCCTAAATTCCCCAACC	24	Sc0003399	+	181729	181880	tgtttggttgggggatttggggagggatttggaaagggaaatggaaaaggtaggtgaaatgtgaataaatcatgtttatatttcacatagtttcacacaccttttccctttccctttccaAATCCCTCCCTAAATTCCCCAACCaaacacag	3'	New	gp4	(((((((((((((((((((((((((((((((((((((((((.(((((((((..((((((((((((((.....))))))))))))))...(.....)..))))))))).)))))))))))))))))))))))))))))))))))))))))...	149	40.8	-103.5	1.7	3	0	3	0	0	4	3.08924	0	3.2193	0	0	3.1531	low
670	568	PC-3p-79570_22	AATTCCTCCTCAAATCTCTCAACC	24	Sc0001002	+	26036	26187	tgtttggttggaggatttggggagggatttggaaagggaaaggaaaaagatgtgtgaaactatgtgaaatttaggcatatttttttcatatttcacctaccttttccatttctctttccaAATTCCTCCTCAAATCTCTCAACCaaacacaa	3'	New	gp4	((((((((((..(((((((((((((((((((((((((((((((((((......((((((.((((..(((..((....))..)))..)))))))))).....)))))).)))))))))))))))))))))))))))))..))))))))))...	149	36.2	-78.3	1.4	15	10	0	0	0	10	15.4462	8.61018	0	0	0	7.88274	middle
671	569	PC-3p-75268_24	AACGACGCCGTTTTGAGACATTCG	24	Sc0000144	-	768772	768911	aaaaatgcttggtagcttgaatttgtgtgacccaaatagctcgaatgtatcaaaacgacgtcgttttactctcaaAACGACGCCGTTTTGAGACATTCGagtgattcaggtcatgaaaattcgagctgccaagcattatt	3'	New	gp4	...(((((((((((((((((((((..((((((..(((..(((((((((.((((((((.(((((((((......))))))))).)))))))).)))))))))..)))..))))))..)))))))))))))))))))))...	134	40	-81.1	1.4	20	10	0	0	3	3	20.5949	8.61018	0	0	2.98467	2.36482	middle
672	570	PC-3p-72631_25	AAATCCCTCTCTAAATCCTCCAAC	24	Sc0002431	+	222332	222484	tgtttggttttggggatttgaggagagatttagaaagagaaagagaaaagttaggtgaaatatgaataaaatatacctacatttcacatagtttcacacaccttttccatttccctttccAAATCCCTCTCTAAATCCTCCAACaaaacacaa	3'	New	gp4	(((((.(((..(((((((((..(((.(((((.(((((.((((..((((((....(((((((.((((................))))....)))))))....))))))..)))).))))).))))).)))..))))))))).))).)))))...	150	34	-47.7	0.9	9	9	4	0	0	3	9.26772	7.74917	4.2924	0	0	2.36482	low
673	571	PC-3p-248836_5	AGCCATTCGAGCCACAGAATTTGT	24	Sc0000706	+	420656	420781	ggaccacaaattttgtggctcaaatggcccgaaactgctaaaacgacgtcgttttgcgtcgttttacatccaaaacgacgtcgttttgagtgtttcaAGCCATTCGAGCCACAGAATTTGTggcta	3'	New	gp4	((.((((((((((((((((((.((((((..(((((.((((((((((((((((((((.((......))...))))))))))))))))).))))))))..)))))).)))))))))))))))))))).	125	45.2	-71.6	1.3	10	3	0	0	0	0	10.2975	2.58306	0	0	0	0	middle
674	572	PC-3p-313076_4	ATCACAAAGGGGTTGTGGGGGTCC	24	Sc0000838	-	235698	235840	aatgagtcagactccctttgtggaggaccctcacaacccccttagtgatctacaccactcatgtatgtgtggggtccacatcatgaatggtgtggATCACAAAGGGGTTGTGGGGGTCCtccacaaagggggtctctatcaac	3'	New	gp4	..(((...((((((((((((((((((((((((((((((((.((.(((((((((((((.(((((...((((((...))))))))))).))))))))))))).))))))))))))))))))))))))))))))))))...)))..	139	51.7	-106	1.4	4	0	0	0	0	0	4.11899	0	0	0	0	0	low
675	573	PC-5p-177740_8	TTAGGGGATTTAGAGAGGGAT	21	xfSc0000160	+	197963	198112	tgtgtttggTTAGGGGATTTAGAGAGGGATttggaaaggaaaatgaaaaaggtaggtgaaacgtaaataaaacatgtctatatttcacctagtttcacacaccttttccctttccctttccaaatccctcctcaaatctcccaactaaat	5'	New	gp4	...((((((((.((((((((((.((((((((((((((((.(((...(((((((((((((((..((.(((.....))).))..))))))))..........)))))))...))).)))))))))))))))))).)))))))).))))))))	147	37.3	-62.9	1.1	6	5	0	0	0	0	6.17848	4.30509	0	0	0	0	low
676	574	PC-5p-34657_55	TTGGAAAATTTGGGGAGGGAT	21	Sc0004972	+	83755	83894	ggTTGGAAAATTTGGGGAGGGATttaaaaatggaaagggaaaaggtgtgtgaaactaggtgaaatataggcatattttattcacatttcacctaccttttccattttcctttctaaatctctctccanaatttttcatga	5'	New	gp4	...((((((((.((((((((((((((.(((.(((((((((((((((..((((((....(((((((((....))))))))).....))))))..))))))))).))))))))).))))))))))))))..))))))))...	134	33.6	-59.9	1.3	17	14	15	0	5	10	17.5057	12.0543	16.0965	0	4.97444	7.88274	middle
677	575	PC-3p-201450_7	ATTTCTCTTTTCAAATCCCTTCCC	24	Sc0000650	-	342184	342335	gtgtttggttgggggatttggggagggatttggaaagggaaagggaaaagggtgtgtgaaactatgggaaatgtaggcatgtttttttcacatttcacctaccttttccATTTCTCTTTTCAAATCCCTTCTCaaatccctcaaccaagagt	3'	New	gp4	...(((((((((((((((((((((((((((((((((((((((.((((((((....((((((...((..(((..((....))..)))..))..))))))...)))))))).)))))))))))))))))))))))))))))))))))))))...	146	42.1	-85.7	1.3	10	7	3	0	0	0	10.2975	6.02713	3.2193	0	0	0	middle
678	576	PC-3p-70280_26	TTGTGAGTGATTTGGAACAGG	21	Sc0003348	+	174907	175067	catggattctctgtacccaaataattttgtccccctgtctcaaatcactaacaatcattgaatatgtcttgacattttcacattttgagattctcatgatctaatggTTGTGAGTGATTTGGAACAGGggaacagaattatttgggaacagaagatcctta	3'	New	gp4	...((((..(((((.(((((((((((((((.(((((((..(((((((((.((((((((((.....(((.(((...(((((.....)))))...))).))).)))))))))).)))))))))..))))))).))))))))))))))).)))))..))))...	155	36	-79.6	1.4	0	7	0	8	7	7	0	6.02713	0	10.3763	6.96422	5.51792	middle
679	577	PC-3p-35837_53	ATGAGACAGACAATGAGACAGAGA	24	Sc0000805	+	585007	585135	aaagatcatttgtttgattttgttttatcttctgtcttatatttatcacatattatcatgtcaccaaaatcaatagttaaaagagtATGAGACAGACAATGAGACAGAGAgtgagacaaatgatcctat	3'	New	gp4	...((((((((((((.((((((((((((..((((((((((((((...((((......))))......(((.....)))....))))))))))))))..))))))))))..)).))))))))))))....	122	28.7	-40.6	1.1	45	40	12	0	3	15	46.3386	34.4407	12.8772	0	2.98467	11.8241	middle
680	578	PC-3p-122177_13	AATCCCTCCTTAAATCTCTCAACC	24	xfSc0001865	+	19657	19805	cccttggttgggggatttggggaaagatttggaaaggaaaagggaaaagacatgtgaaattaggtgaaatataaatatgttttattcacatttcacctactttttccatttcattttccaAATCCCTCCTTAAATCTCTCAACCaaaca	3'	New	gp4	...(((((((((((((((..(((..(((((((((((((((.((((((((....(((((((...(((((((((....)))))))))....)))))))...)))))))).)))).)))))))))))..)))..)))))))))))))))...	143	34.9	-65.1	1.3	7	6	0	0	0	0	7.20823	5.16611	0	0	0	0	low
681	579	PC-5p-99710_17	ATTTTAGGATTCGTTGAGTATATC	24	Sc0000026	+	744134	744273	ctaacccttcacATTTTAGGATTCGTTGAGTATATCatccttgcaaaaaatcaagttgaccggatgattgccattatctgatcgacttgattttttatacggacgatgtgttcgacgaatcctaaaatgtgaacggtgat	5'	New	gp4	...(((.((((((((((((((((((((((..(((((.(((.(..(((((((((((((((.((((((((....)))))))).)))))))))))))))..).))).)))))..)))))))))))))))))))))).)))...	134	37.9	-74.3	1.4	11	4	5	0	0	0	11.3272	3.44407	5.3655	0	0	0	middle
682	580	PC-3p-106909_15	AATCCCTCTTCAAATTCTCCAACC	24	Sc0001442	+	38264	38415	tgtttggttgggggattttggaaggaatttggaaagagaaagggagaaagtgtgtgaaactaggtgaaatataggtatgttttattcatacttcacctgtctttttcatttctctttccaAATCCCTCTTCAAATTCTCCAACCaaacacaa	3'	New	gp4	((((((((((((((((((.((((((.(((((((((((((((..(((((((.((.....)).(((((((.(((..(((.....)))..))).)))))))..))))))).))))))))))))))).))).)))))))))))))))))))))...	149	36.2	-69.5	1.3	11	7	0	0	0	0	11.3272	6.02713	0	0	0	0	middle
683	581	PC-5p-66328_28	GGTGGTTGAGATTTATTGGCA	21	Sc0002405	+	331908	332013	ctagagtgttacattgGGTGGTTGAGATTTACTGGCAagtcacatcagaaaaattgatgtgacttgccagtaaatctcaaccacacaatngcaaggaacactcaaa	5'	New	gp4	...(((((((..((((.(((((((((((((((((((((((((((((((.....))))))))))))))))))))))))))))))).)))).......)))))))...	100	39.6	-66.3	1.6	1.5	0	4.5	8	0	0	1.54462	0	4.82895	10.3763	0	0	middle
684	582	PC-3p-168622_9	ATTCCCTCCCTGTTTCCTTTT	21	Sc0000109	+	985284	985477	gtgtttggatcatgggcttgtgtagggatttggaaaggaaaaggaaaagggaaaggggagggaaatgtgaatgaaatataataagctatttgttttcttcatttcactcacctattcacaATTCCCTCCCTGTTTCCTTTTcctttctctttctctttccaaatctctacctaaattcatgatccaaaaacaac	3'	New	gp4	((.((((((((((((..((..((((((((((((((((((((((((((((((((..(((((((((.((((((((((((.....((((.....)))).....))))))........)))))).)))))))))..)))))))))))).....)))).))))))))))))))))..))..)))))))))))).))...	191	37.1	-92.8	1.3	6	4	5	0	0	0	6.17848	3.44407	5.3655	0	0	0	low
685	583	PC-3p-136272_11	ATTTCCTTTTCCAAATCCCTCATC	24	Sc0004615	+	79674	79834	actttgtgtttggttgagagatttgaggagggatttagaaaggaaaagggaaaatgtgtgtaaaactaggtgaaatataagtatgctttattcacatttcaccgacattttccATTTCCTTTTCCAAATCCCTCATCaaatccctcaaccaaacataacat	3'	New	gp4	...(((((((((((((((.(((((((.(((((((((.(((((((((..(((((((((((.....))..((((((((...((((.....))))...)))))))).))))))))).)))))))))..))))))))).))))))).)))))))))))))))...	155	34.8	-74.5	1.3	0	0	4	3	0	4	0	0	4.2924	3.89112	0	3.1531	low
686	584	PC-3p-129365_12	AATCCTTTCTCAAATTCCCCAACC	24	Sc0000087	-	780338	780489	tgtttggttggaagatttggggagggatttggaaagaaaaagggaaaatgtgtgtgaaattatgtaaaatataagtatatttttttcacatttcacgtacttttttcatttttttttccaAATCCTTTCTCAAATTCCCCAACCaaacaaag	3'	New	gp4	(((((((((((..((((((((((((((((((((((((((((.((((((.((..(((((((.....(((((((....)))))))......)))))))..)).)))))).))))))))))))))))))))))))))))..)))))))))))...	149	30.3	-71.1	1.5	9	3	0	0	0	0	9.26772	2.58306	0	0	0	0	low
687	585	PC-3p-102598_16	ATTTTGAGCCATTTGAGCCACACT	24	xfSc0028114	+	284	413	nnnggtcacaaaaaatgagctcaaatggctcaaaactgtcaaaatgacgtcgttttgcgtcattttacacccaaaatgacatcatttttgacaATTTTGAGCCATTTGAGCCACACTttttgtggccctc	3'	New	gp4	...(((((((((((.((.(((((((((((((((((.(((((((((((.(((((((((.((........)).))))))))).))).)))))))).)))))))))))))))))..)).)))))))))))...	124	38.5	-66.3	1.3	17	5	0	0	0	0	17.5057	4.30509	0	0	0	0	middle
688	586	PC-3p-170907_8	AAATCTCTTCCCAATTCCTCCAAC	24	Sc0003072	+	178958	179104	gttggaggatttaagaagagatttgaaaaagaaaagagaaaaaagaaaagttaggtgaaatgtgaataaaatatacctacatttcacctagtttcacacaccttttctctttcctcttttAAATCTCTTCCCAATTCCTCCAACtaa	3'	New	gp4	(((((((((.((..((((((((((((((.((.((((((((((..((((..((((((((((((((.............)))))))))))))))))).......)))))))))).)).))))))))))))))..)).)))))))))...	144	31.3	-60.5	1.3	7	0	0	0	0	4	7.20823	0	0	0	0	3.1531	low
689	587	PC-3p-7005_254	TTCCGTTGCCTCCACAAATCT	21	Sc0002753	+	28148	28291	gctgtgtttggacctcagatttgagtgggtatttgtggagggaaaggaaaaaggaagggaaaagtgaagaaaatttacttctatttcattcacttTTCCGTTGCCTCCACAAATCTctcctcaaatccttaattcaaacacaac	3'	New	gp4	..((((((((((.....((((((((..(..(((((((((((.((.((((((..(((.(((((((((((.....)))))))...)))).)))..)))))).)).)))))))))))..)..)))))))).....))))))))))..	140	38.9	-60.3	1.1	41	40	24	25	50	74	42.2196	34.4407	25.7544	32.426	49.7444	58.3323	middle
690	588	PC-3p-182064_8	ATCACACAATATAGCACTCTAGGA	24	Sc0000615	+	634748	634926	caccaaggatcctctagagtgatttttctctaaagtttcctaaagtgctacattgtgtggttgagatttactggcaagtcacatcaatttttctgatgtgaattgccagtaaatctcaATCACACAATATAGCACTCTAGGAaactttaggaaaatttcactctagaggatccttgctc	3'	New	gp4	...(((((((((((((((((((..(((..(((((((((((((.(((((((.((((((((((((((((((((((((((.((((((((.......)))))))).)))))))))))))))))))))))))).))))))).)))))))))))))..)))..)))))))))))))))))))...	173	37.4	-125.1	1.9	7	4	0	0	0	0	7.20823	3.44407	0	0	0	0	low
691	589	PC-5p-108681_15	ATCCTCCTTGCAACGGCTGAGATC	24	Sc0000611	+	323995	324163	cccctcctagcaacttctccttgcaATCCTCCTTGCAACGGCTGAGATCagctgttgcaacatccaatggctgagatcaactgctaaagaaattaaaatcagtcgttgggtgttgcaatagctgatctcaactgttgcaaggaggattgcaaggaggatttccaaggag	5'	New	gp4	...(((((......(((((((((((((((((((((((((((.((((((((((((((((((((((((((((((((......((.....)).........)))))))))))))))))))))))))))))))).)))))))))))))))))))))))))))......)))))	166	46.7	-113.6	1.4	6.5	1.5	2.5	0	0	0	6.69336	1.29153	2.68275	0	0	0	low
692	590	PC-3p-69426_26	AATGGTTGTGAGTGATTTGGGACA	24	xpSc0053815	+	130488	130663	gaagtagtaaggatctcctgtcctcaaatattcatgtccctctgtctcaaatcactcgcaaccattggatcatatgaaaatttcaagatttgaaaatctcaaaacatatctAATGGTTGTGAGTGATTTGGGACAtggggatagagatatttagggacagggaatccttgggcaaa	3'	New	gp4	...((..(((((((..(((((((..(((((((..((((((..((((((((((((((((((((((((((((....(((...((((((...))))))...)))......))))))))))))))))))))))))))))..))))))..)))))))..)))))))..))))))).))...	170	38.6	-93.6	1.4	16	7	0	0	3	0	16.476	6.02713	0	0	2.98467	0	middle
693	591	PC-3p-77452_23	AAATCCCTCCCCAAATCCCTAACC	24	Sc0001713	-	247739	247890	tatgtttagttgagggatttaggaagagatttggaaagggaaagggaaaaaggaggtgaaatatgcataaaatataccaatatttcattaatttcacacaccttttccatttccattttcAAATCCCTTCCCAAATCCCTAACCaaacacaa	3'	New	gp4	..(((((.(((.((((((((.(((((.((((((((((.(((((.((((((.((..((((((((((....((((((....)))))))))..)))))))...)))))))).))))).)))))))))).))))).))))))))))).)))))...	147	33.6	-58.2	1.1	11	12	0	0	0	0	11.3272	10.3322	0	0	0	0	middle
694	592	PC-3p-139456_11	AATTCCTCCCTAAATCTCCCAACC	24	xfSc0000139	-	39357	39508	tgtttggttgggagatttgagaatggatttggaaaggaaaatgaaaaaagtagataaaatgtgaataaaatatgtatatatttcacatagtttcacatatcttttttctttccctttccaAATTCCTCCCTAAATCTCCCAACCaagcacat	3'	New	gp4	(((((((((((((((((((.((..(((((((((((((.(((.((((((((........(((((((.....(((((.........)))))..)))))))..))))))))))).))))))))))))).))..)))))))))))))))))))...	149	30.9	-62.3	1.3	10	0	3	0	0	4	10.2975	0	3.2193	0	0	3.1531	middle
695	593	PC-3p-132987_12	AATCCTTACTCAAATCCTCCAACC	24	Sc0003134	-	150869	151017	ctttatttggttgggagatttagagagggatttgaaaagaaaaaagaaaaatgtgtgtgaaattagataaaatataagtatattttatttacatttcacctatattttttctttccaAATCCTTACTCAAATCCCCCAACCaaatacaa	3'	New	gp4	...((((((((((((.(((((.((((((((((((.(((((......((((((((..(((((((((((((((((((....)))))))))))).)))))))..))))))))))))).))))))))).)))))))).))))))))))))...	143	26.8	-60.2	1.5	5	4	0	0	0	3	5.14874	3.44407	0	0	0	2.36482	low
696	594	PC-3p-121147_13	AATCTCTCCCCAAATTTCCCAACC	24	Sc0000084	+	1498424	1498574	tgtttggttgggggatttgaagagggatttggaaagaaaaatagaaaaggtaggtgaaatgtgaataaaatatacatatatttcacctaatttcacacaccttttcacttttcctttccaAATCTCTCCCCAAATTTCCCAACCaaacata	3'	New	gp4	((((((((((((..(((((..(((((((((((((((.((((..((((((((..((((((((((((................)))))...)))))))..))))))))..)))).)))))))))))))))..)))))..))))))))))))..	149	33.8	-74.6	1.5	8	11	0	0	0	0	8.23798	9.4712	0	0	0	0	low
697	595	PC-3p-131003_12	TTGGTCCCTCTAGTTTTGCAC	21	Sc0000015	+	72113	72331	atggaaaaggattatgtgtaaaactaaagggaccaaagtgaaattcaaaacatactatggggaccatcagtgtaatatattcattacacgtagtctttataatttgttttgaattctactTTGGTCCCTCTAGTTTTGCACctaatttttttccattcaaaatgttaacaacgcatgtcggagggatcacattgcaacaaaattgaaagtgtagggacc	3'	New	gp4	((((((((..((((.(((((((((((.((((((((((((..(((((((((((...(((..((((.....(((((((......)))))))...))))..)))...)))))))))))..)))))))))))).))))))))))).))))..)))))))).....((((.......))))......((..(((((((.(((.....)))..))))).))..))	156	34.2	-84.4	1.1	8	0	0	3	5	4	8.23798	0	0	3.89112	4.97444	3.1531	low
698	596	PC-3p-121440_13	AAAGCTGATTATAACCATCTTTCC	24	Sc0003049	+	253619	253752	atgggccttttttggcaacttggttataatctgctttttagattataactcattttctctctcacaaaaaagctgcttataagcagcttttcaccaaAAAGCTGATTATAACCATCTTTCCaaaataggccata	3'	New	gp4	...(((((.((((((.((..(((((((((((.((((((((((..((.....))..))).........((((((((((....))))))))))....))))))).)))))))))))..)).)))))).)))))...	128	33.6	-51.2	1.1	8	5	0	0	0	0	8.23798	4.30509	0	0	0	0	low
699	597	PC-5p-66592_27	CTGCGGCACGTGGCACTGCCA	21	Sc0000302	-	529602	529704	aaattattcgCTGCGGCACGTGGCACTGCCAtaaatctctttgcggcattggtactgccacaaatctcattgtggcattgtcgcctgccacagtgaataacgg	5'	New	gp4	...((((((((((.((((.((((((.((((((((.....((((.((((.......)))).)))).....)))))))).)))))).)))).))))))))))...	97	49.5	-49	1	7	4	0	7	6	3	7.20823	3.44407	0	9.07927	5.96933	2.36482	low
700	598	PC-5p-197233_7	ATGCTCTGATACCACTGTTGGAAA	24	Sc0000312	+	728978	729146	atgctctgataccattgttggtggtATGCTCTGATACCACTGTTGAAAAttaattatgaaaatttcttttagaaactctaatactactaatgaaagtgtgagaggtgtgaattaatgtatgattgaaattaagtttgaattttcaacagtggtagcagagcatagcacc	5'	New	gp4	...................((((.(((((((((.(((((((((((((((((....((...((((((..(((....((((.(((((.........))))).))))...............)))..))))))..))...))))))))))))))))).))))))))).))))	150	32.5	-57.6	1	8	4	0	0	0	0	8.23798	3.44407	0	0	0	0	low
701	599	PC-3p-51104_37	TCCTACTCAAATCCAAGATCC	21	Sc0002184	-	182844	182987	ggatcttggatttgagtagagatttgaagaggggaaaaagaagggaagggaaaagtgacgaaaataaaagctaattttttttatcaattttcccttctcaattcctttccctccacaaaaTCCTACTCAAATCCAAGATCCaaa	3'	New	gp4	(((((((((((((((((((.(((((...((((((((...(((((((((((((((.(((..((((.............))))..))).))))))))))))..))).))))))))....))))))))))))))))))))))))...	141	35.4	-71.5	1.4	17	18	21	0	0	0	17.5057	15.4983	22.5351	0	0	0	middle
702	600	PC-3p-160249_9	ATCATACAACACACCACTCTAGGA	24	Sc0002751	+	104800	104992	atctcataagtaccaaggatcctttagagttttttttttttcctaaagtttcctaaagtggtgtattgtatgggtgagatttaatgctaaaaaattgatgtgacttgtcatgaaatctcaATCATACAACACACCACTCTAGGAaactttaagaaaaaaaaactctagaggatccttactcacatgaggtata	3'	New	gp4	(((((((.((((...(((((((((((((((((((((((((...((((((((((((.((((((((.(((((((..((((((((.((((...................).))).))))))))..))))))).)))))))).)))))))))))))))))))))))))))))))))))))))))...)))))))...	190	32.1	-90.4	1.5	2.5	8	0	0	0	0	2.57437	6.88815	0	0	0	0	low
703	601	PC-3p-190364_7	ATCCCTCCTCAAATTCACCAAC	22	Sc0000488	-	351012	351161	tgtttggttggggatttggggagggatttggaaagggaaagggaaaagttgtgtgaaattaggtgaaatataggcatgttttattcacatttcatctactttttccatttttcttttcaaATCCCTCCTCAAATTCTCCAACcaaacata	3'	New	gp4	(((((((((((((((((((((((((((((((((((..((((((((((((...(((((((...(((((((((....)))))))))....)))))))..))))))))).)))..)))))))))))))))))))))))).)))))))))))..	148	36	-81.6	1.5	0	0	0	3	0	7	0	0	0	3.89112	0	5.51792	low
704	602	PC-3p-120543_13	ACTGATCAGTCAATTTTATCACCC	24	Sc0002996	+	155989	156149	tgggtaataaaattgactgattagttaggctgttggttaaaatttgttaattccatatagttttgtacgagtccatactatatttttatttcaaatcaccaaattttaatcaatagcctaACTGATCAGTCAATTTTATCACCCaaccagtccaacccaac	3'	New	gp4	(((((.((((((((((((((((((((((((((((((((((((((((........(((((((..((........)).))))))).(((.....)))....)))))))))))))))))))))))))))))))))))))))).)))))................	145	31.1	-65.9	1.3	6	10	0	0	0	0	6.17848	8.61018	0	0	0	0	low
705	603	PC-3p-31682_60	TCGTTTTGGCATTTTCAGACC	21	Sc0001900	-	243517	243683	ttcggcaatggttggtggccacaaattttgtggtttaaatggtccgaaaatgtcaaaacgacgtcgttttgggtacaaaacaattccaaaaatgctaaaataacgTCGTTTTGACATTTTCAGACCatttgagccacataatttgtggccaccaaacattttcctaa	3'	New	gp4	...((.((((.((((((((((((((((.((((((((((((((((.(((((((((((((((((((..(((((((...........)))))))...........))))))))))))))))))).)))))))))))))))).)))))))))))))))).))))..))...	161	37.7	-93.3	1.5	18	8	9	14	5	6	18.5354	6.88815	9.6579	18.1585	4.97444	4.72964	middle
706	604	PC-3p-167521_9	AGGTAATCTAAGGGTCACAAATCT	24	Sc0002513	+	137651	137825	tacagtaatgctagatatcatgaaaagtcttttatgaaactgatcatgaaagatttatgacctttggattacatttagaataaaacaccacacactaatcaAGGTAATCTAAGGGTCACAAATCTttcatgatcattttcatgaaatttttttcataatttctaacatttctcta	3'	New	gp4	...((.((((.((((.((.((((((((..((((((((((.((((((((((((((((.(((((((((((((((..((((................)))).....))))))))))))))).)))))))))))))))).))))))))))..)))))))).)).)))).)))).))...	169	27.4	-68.7	1.4	10	0	3	0	0	0	10.2975	0	3.2193	0	0	0	middle
707	605	PC-3p-70898_26	AATCCTTCCTTAAATCTCCCAACC	24	Sc0000423	-	249960	250111	tgtttggttgggggatttggggagggatttggaaagtgaaagggaaaaggtgtgtgaaactaggtgaaatttaagcatgatttatttatttttcacctaccttttccatttccctttccaAATCCTTCCTTAAATCCCCCAACCaaacacag	3'	New	gp4	((((((((((((((((((..((((((((((((((((.((((.(((((((((..........((((((((..((((.........))))..))))))))))))))))).)))).))))))))))))))))..))))))))))))))))))...	149	39.5	-88.6	1.5	17	20	3	0	0	16	17.5057	17.2204	3.2193	0	0	12.6124	middle
708	606	PC-3p-106427_16	AAAATATTTAGGGTCTCTAGCATT	24	Sc0002946	+	220090	220210	aatgttagggatcccaaatattttaccaaatattctaccaaatatctgtgagacccacatgggacacctatgtgagatatttggtagaacatttggtAAAATATTTAGGGTCTCTAGCATT	3'	New	gp4	((((((((((((((.((((((((((((((((.(((((((((((((((........((((((((...))))))))))))))))))))))).)))))))))))))))).))))))))))))))	121	34.7	-66.4	1.6	10	6	0	0	0	0	10.2975	5.16611	0	0	0	0	middle
709	607	PC-3p-137501_11	AAGTTAGTTTGTTTGGCATATTCT	24	xpSc0053276	-	29780	29906	aacaagtcaaaaaaagttaagaatgtgtcaaacaaattatcttttattagttaaaataagcctacgaaaaaaggcaaagttaaaaAAGTTAGTTTGTTTGGCATATTCTtagcctttttgacttttg	3'	New	gp4	...((((((((((..((((((((((((((((((((((((.(((((.....((((.....((((........))))....))))))))).)))))))))))))))))))))))).))))))))))...	121	26	-47	1.4	11	0	0	0	0	0	11.3272	0	0	0	0	0	middle
710	608	PC-3p-158329_9	ACACGTGACTGCCGTTATCCAATC	24	Sc0005880	-	35436	35611	cgagtacattatctttacaaaaaattaagttgatcggaataacggtaaccacgtgtgtggatcagttttgtgtaaaaaaaaaaatgaatgaaataaacggttcatacaaaactgatccgaACACGTGATTGCCGTTATCCAATCaacttgatttttttgcaaagataatatacgca	3'	New	gp4	...(((.(((((((((.(((((((((((((((((.(((.(((((((((.(((((((..(((((((((((((............((((((..........)))))))))))))))))))..))))))).)))))))))))).)))))))))))))))).).))))))))).)))...	170	32.4	-76.1	1.3	3	3	0	0	3	0	3.08924	2.58306	0	0	2.98467	0	low
711	609	PC-3p-31318_61	ATTAAATCGTGTGATTGTGAGTGA	24	Sc0000757	-	427204	427332	tcaccaagaatgtgtttgcccctttacttcattcactcatagtcatctgatttaatttttaatgctgaaaaaaATTAAATCGTGTGATTGTGAGTGAtaaaatagaagggcatgtaccttttttggatg	3'	New	gp4	...(((((((.(((..(((((.((((.((...(((((((((((((..(((((((((((((.........)))))))))))))..)))))))))))))..)).)))).)))))..)))..)))))))...	123	32.6	-49.5	1.2	26	38	4	0	0	6	26.7734	32.7187	4.2924	0	0	4.72964	middle
712	610	PC-3p-87874_20	AAATTCGAGCCATTTGAGCCACAG	24	Sc0000301	+	145101	145262	gaaaatgtttgagggccctaatttctgtggctcaaatggtttaaatttgtcaaaacgacgtcgttttggcaattttgatgttgttttgtactcaaaacgacatcgttttggcAAATTCGAGCCATTTGAGCCACAGaaattagggccctctatcattgttgt	3'	New	gp4	...((((...(((((((((((((((((((((((((((((((..(((((((((((((((.((((((((((((((......)))))........))))))))).)))))))))))))))..)))))))))))))))))))))))))))))))...)))).....	154	38.9	-100.2	1.6	19	8	0	0	0	7	19.5652	6.88815	0	0	0	5.51792	middle
713	611	PC-3p-102505_16	ACATCGCTTTGACATTTTCGGGCC	24	Sc0001263	-	98318	98505	acggtcaaaaatggagtgtctacatgtggccacaaattctgtggttcaaatggcccgaaaataccaaaacgacgtcgttttggcattttcggagttgttttgtaccaaaaacgACATCGTTTTGACATTTTCGGGCCatttgagccacagaatttgtggccaccaatcattgccgttttgttaacaat	3'	New	gp4	...((..(((((((((((.......(((((((((((((((((((((((((((((((((((((..((((((((.((((((((((.((...............)).)).)))))))).))))))))..)))))))))))))))))))))))))))))))))))))....)))).)))))))....))...	182	42	-98.5	1.2	6	5	5	0	0	0	6.17848	4.30509	5.3655	0	0	0	low
714	612	PC-3p-34244_56	AAAAAATTGTGACCCTCTAGCATT	24	Sc0001696	-	277369	277515	aaatgtttgagggccacaatttttggggccacaatggctcaaaactgtcaaaacgatgtcgtttgggcgcaaaacatgccaaaacgacgtcgttttgacagttttgagccattgtagccaAAAAAATTGTGACCCTCTAGCATTgtt	3'	New	gp4	.((((((.(((((.((((((((((..(((.((((((((((((((((((((((((((((((((((.((((.......)))).)))))))))))))))))))))))))))))))))).)))..)))))))))).))))).))))))...	143	42.9	-97.2	1.5	21	23	5	0	4	7	21.6247	19.8034	5.3655	0	3.97955	5.51792	middle
715	613	PC-3p-99933_17	GCACCCATACAACACACCACT	21	Sc0001728	-	337217	337416	actagatgagttcttggagcaaggatcctctagagtttttttttcctaaggtttcctagagtggtgtgttgtatggttgagatttaatgacaagtcacatcaattttttagcattaaatcTCACCCATACAACACACCACTttaggaaactttaggaaaaaaaaactctagaggatccttggtggagtttcttgcctcaa	3'	New	gp4	...((..(((..(((....(((((((((((((((((((((((((((((((((((((((((((((((((((((((((.((((((((((((..(((............)))..)))))))))))).)))))))))))))))))))))))))))))))))))))))))))))))))))))))))...)))...)))..))...	194	37	-118.4	1.6	0	0	6	11	0	0	0	0	6.4386	14.2674	0	0	middle
716	614	PC-3p-217224_6	ATCTTTCATGACCATTTTAATGAA	24	xfSc0011932	-	13	173	atattagagatcatgaaaattttgtcatgaaaaggatcatgaaaaatttgtgacccttagattactttaattactgtgtggtgctttattgtaagtgtaatccaaaggtcacaaATCTTTCATGACCATTTTCATGAAaaacttttcatgatacctagcat	3'	New	gp4	...((((..((((((((((.(((.(((((((((((.((((((((.((((((((((.((.((((((.....((((..((........))..))))..)))))).)).)))))))))).)))))))))).))))))))).))).))))))))))..))))...	155	29.8	-60.1	1.3	3	8	0	0	0	0	3.08924	6.88815	0	0	0	0	low
717	615	PC-3p-181719_8	AAATCCCTCTTCAAATCCCTCAGC	24	Sc0000038	-	678807	678960	gtgtttggttgggagatttatggaaggatttgaaaaggaaaatggaaaaagtatgtgaaatgtgaataaaatatgtctatatttcacctagtttcacacactttttccctttctctttccAAATCCCTCTTCAAATCCCCCAGCcaaacacaac	3'	New	gp4	(((((((((((((.(((((..(((.(((((((.((((..(((.(((((((((.(((((((((((((................)))))...)))))))).))))))))).)))..)))).))))))).)))..))))).)))))))))))))...	151	35.7	-70.9	1.3	8	3	0	0	0	0	8.23798	2.58306	0	0	0	0	low
718	616	PC-3p-187760_7	AAGTCTCTCCTTAAATCTCCCAAC	24	Sc0001044	-	466179	466338	cgagttgtatttggttaggggatttgaggaggggtttagaaataaaaagggaaaatgtaaatgaaatatgaataaaatatacctacatttcacctaatttcacacactttttctctttccAAATCTCTCCTTAAATCTCCCAACcaagcacagtcttaaa	3'	New	gp4	.(((((((..((((((.((((((((((((((((((((.(((......((((((((.((...((((((.((((................))))....))))))...)).))))))))))).)))))))))))))))))))).))))))..)))).)))...	156	33.1	-54.5	1	4	7	0	0	0	0	4.11899	6.02713	0	0	0	0	low
719	617	PC-5p-95689_18	ATTCATGTCCCCATGTCCCAAATC	24	xpSc0054033	-	98288	98423	aggatcccctatctccaaatATTCATGTCCCCATGTCCCAAATCactcacaaccattggattccaaaatttgagaatctcaagacatatccgatggttgtgagtgatttggaataaagggacataaatatttgata	5'	New	gp4	(((....))).....((((((((.(((((((..(((.((((((((((((((((((((((((.......((((((...))))))....)))))))))))))))))))))))).)))..))))))).))))))))...	118	37.5	-66	1.3	12	6	4	0	0	5	12.357	5.16611	4.2924	0	0	3.94137	middle
720	618	PC-3p-165626_9	AATCCCTCCTCAAATCCCTTT	21	xpSc0054547	-	42360	42511	tgtttggttaggagatttggggagggatttggaaagggaaagagaaaaggtgtgtgaaactatatgaaatgtaggtatatttttttcacatttcacctaccttttccattttcttttccaAATCCCTCCTCAAATCCCTTAaccaaacacag	3'	New	gp4	((((((((((((.((((((((((((((((((((((((((((..((((((((..((((((......(((((((....))))))).......))))))..))))))))..)))))))))))))))))))))))))))).))))))))))))...	149	36.8	-82.4	1.5	3	3	0	0	3	6	3.08924	2.58306	0	0	2.98467	4.72964	low
721	619	PC-5p-154894_10	AAAATCATTTCGCATCCGTTCGCC	24	Sc0004518	-	138934	139021	agAAAATCAATTCGCATCCGTTCGCCaattcggcagacgtggattgagcgaattggcggtttggcggatggatgggaatcgatttggc	5'	New	gp4	...(((((.((((.((((((((((((((..((.(((.(((.......)))..))).))..)))))))))))))).)))).)))))...	82	51.1	-41.2	0.9	7	10	0	0	0	0	7.20823	8.61018	0	0	0	0	low
722	620	PC-5p-87634_20	CGGATGTCAGAAAGTATGCGT	21	xfSc0003206	+	13714	13888	tttaagatttgttgaggtataaaatcaagttgatCGGATGTCAGAAAGTATGTGTtcgaaaaattatttattaatttttttttaaaaattatttgtagttcgatgaaccgaacacgtagtttttgatatccgatcaacttgattttttacaggtttgatatactcaacaaatctt	5'	New	gp4	...((((((((((((((((.(((((((((((((((((((((((((((.((((((((((...((((((....((((((((....))))))))...))))))........)))))))))).))))))))))))))))))))))))))).)))............)))))))))))))	172	26.3	-74.8	1.6	0	0	0	5	4	11	0	0	0	6.4852	3.97955	8.67102	low
723	621	PC-3p-1588_1044	TTGGTAGATTACTTGGGTCCT	21	Sc0003241	-	244912	245063	aatgctagagaccccaaataatctattaaatgatttaccaagcctctcacatggcatgagactcacacaaacccacatgtgtgtgggttccacacccatatgaaaggtttggtaaaacatTTGGTAGATTATTTGGGTCCTctagcattact	3'	New	gp4	((((((((((..(((((((((((((..(((((.((((((((((((.(((.((((..((..(((((((((..........)))))))))..))...)))).))).)))))))))))).)))))..)))))))))))))..))))))))))...	149	40.1	-81.6	1.3	99	76.5	58.5	189	193.5	325.5	101.945	65.8679	62.7764	245.14	192.511	256.583	middle
724	622	PC-3p-102930_16	GTTGTCCCACATTGGTTAGGGGAG	24	xpSc0053733	-	9829	9942	gatggggaggaatatttcttccctaattgatgtcggacaatttgccaaggtgagtgcctcgccaattgttaaGTTGTCCCACATTGGTTAGGGGAGaaaaacttacccccctct	3'	New	gp4	((.((((.((((..(((((((((((((..((((.(((((((((..(((((((((...))))))..)))..))))))))).))))..)))))))))))))...)).)))))))).	113	46.5	-58.1	1.1	4	13	4	0	0	0	4.11899	11.1932	4.2924	0	0	0	middle
725	623	PC-5p-3059_542	GTCTCAATCAATTATGGTCGGTCA	24	Sc0000570	+	139527	139685	ggcgtggtttgagatcattacgttatttttgGTCTCAATCAATTATGGTCGGTCAaatcaataaaaattccaaagtgaaatcttgaatctcacttttgttaatttgaccgatcataattggtcggaactataagtaatgttgtgatcttgaaccacaaa	5'	New	gp4	...((((((..((((((..(((((((((.((((..(.(((((((((((((((((((((.((((((........(((((.((.....)).))))))))))).))))))))))))))))))))).)..)))).)))))))))..))))))..))))))...	153	33.3	-71.5	1.4	170	370.5	57	14	9	15	175.057	319.007	61.1667	18.1585	8.954	11.8241	middle
726	624	PC-5p-112233_15	AAGTTTTTGAGTCGGCAATCTGCC	24	Sc0002307	+	39664	39753	gggtcgcaaaAAGTTTTTGAGTCGGCAATCTGCCgacgcaaaaagtttcaattttttgagacggtagattgccgactcaaaaagtgatta	5'	New	gp4	..(((((......((((((((((((((((((((((...((((((((....))))))))...)))))))))))))))))))))))))))..	86	41.1	-46.6	1.3	8	3.5	0	0	0	0	8.23798	3.01356	0	0	0	0	low
727	625	PC-3p-42085_45	AGGCCTCTTCACTTATAGTCAATT	24	Sc0000297	-	77800	77995	ggtctctcgagccaaatcnaattctttgatgcgtctaatccaaaatcaattggcattaagtgaagaggcctctagactatatgaatcaagcttgggttgctattggtttatatagtttaaAGGCCTCTTCACTTATAGTCAATTagttttgagttggatgcctccaaaattctaacatggtatcagagctagtctt	3'	New	gp4	((.((((.((((((.....((((.((.((.((((((((..(((((..(((((((..(((((((((((((((.(((((((((((((((((((.......)))..)))))))))))))))).)))))))))))))))..)))))))..)))))..)))))))).)).))))))......)))).))))))))......	190	37.2	-83.2	1.1	21	42.5	10	0	3	3	21.6247	36.5933	10.731	0	2.98467	2.36482	middle
728	626	PC-5p-145690_10	AAAATGTTTGAGGGCCACAAAATC	24	Sc0002257	+	345765	345908	AAAATGTTTGAGGGCCACAAAATCagtggctcaaatgactcaaaactgttaaaatgacatcattttgtttcgttttaagcacaaaacgatatcattttgacagttttaagccatttaaatcactgattttgtggccttcagcat	5'	New	gp4	...(((.((((((((((((((((((((((...(((((.((.((((((((((((((((.(((.((((((...((.....)))))))).))).)))))))))))))))).)).)))))...)))))))))))))))))))))))))	141	33.3	-67.1	1.4	7	3	0	0	0	0	7.20823	2.58306	0	0	0	0	low
729	627	PC-3p-85092_20	ATTCCGATCGAGGGGCTATCGAT	23	Sc0005478	+	55664	55849	ccatcgagtacttcatgcctgcaaaaaatcacatagatcggatatcggtagccctttgatcggaacacatttttgtcaatagtaaatataattttaaaaataaattgttaacaaaaatatATTCCGATCAAGGGGCTATCGATatccgatcaatgtgattttctgtaggcatgaaatactcgacaa	3'	New	gp4	...(((((((.((((((((((((.((((((((((.((((((((((((((((((((((((((((((...((((((((.((((((....................)))))).))))))))...)))))))))))))))))))))))))))))).)))))))))).)))))))))))).)))))))...	180	33.9	-106.8	1.7	7	8	2.5	0	0	0	7.20823	6.88815	2.68275	0	0	0	low
730	628	PC-3p-99575_17	TTGAGCCATTATGACCACAAAT	22	Sc0004653	-	6748	6883	ctagagggctataatttttgtgatcataatgacttaaaattgttaaaacaatgtcgttttggcatattttgaacctaaaatgacatcgttttgacagttTTGAGCCATTATGACCACAAAAattgtgactttcaaa	3'	New	gp4	...((..(..((((((((((((.((((((((.(((((((((((((((((.((((((((((((((.....))...)))))))))))).))))))))))))))))).)))))))).))))))))))))..)..))...	130	30.1	-60.1	1.5	5	4	4	0	0	4	5.14874	3.44407	4.2924	0	0	3.1531	low
731	629	PC-3p-129106_12	ATTTCTCTTTTCAATTTCCTCCTC	24	xpSc0055671	+	16181	16339	tattgtgtttaattgggagatttaaggagaaatttggaaagagaaagggaaaaggtgtgtgaaactatgtaagatataagtatgttttattcatatttcacctgtattttttATTTCTCTTTTCAATTTCCTTCTCaaatctcttaaccaaacacggca	3'	New	gp4	...(((((((..((..(((((((.(((((.((.(((((((((((((..(((((.....((((((.((((((((((((....))))))))..)))))))))).....)))))..))))))))))))).)).))))).)))))))..))..)))))))...	153	29.6	-53.6	1.1	6	6	3	0	0	0	6.17848	5.16611	3.2193	0	0	0	low
732	630	PC-3p-149948_10	AAATCCCTCCTCAAATTCCCAACC	24	xpSc0055402	-	12376	12527	atgtttggttgaggaatttgggaagagatttggaaaggcaaagggaaaaggtgtgtgaaactaagtgaaatatacgcatgttttattcacatttcacctaccttttccatttccctttccAAATCCCTCCTCAAATTCCTAACCaaacacag	3'	New	gp4	.(((((((((.(((((((((((.((.((((((((((((.(((.(((((((((..((((((...((((((((((....))))))))))....))))))..))))))))).))).)))))))))))).)).))))))))))))))))))))...	148	38.2	-73.3	1.3	6	3	0	0	0	4	6.17848	2.58306	0	0	0	3.1531	low
733	631	PC-5p-155717_10	TTTCTTGAACTTCCATATCTT	21	Sc0000948	+	652842	652960	gtcctgccatgcttttccacagcTTTCTTGAACTTCCATATCTAttgttcttaattttgttttctagaaatagatcaactgtggaagctcaagaaagctgtgggaagacatggcagttc	5'	New	gp4	...((((((((..((((((((((((((((((.((((((((...((((....)))).......((((....)))).....)))))))).))))))))))))))))))..))))))))...	113	39.5	-59.4	1.3	3	7	0	0	0	0	3.08924	6.02713	0	0	0	0	low
734	632	PC-3p-100962_17	TCCCTCTCCAAATCCTCCAT	20	Sc0000108	-	579903	580050	tttggttgggggatttgaggagggatttggaaagggaaatggaaaaggtatgtgaaatatgaataaaacatgtctaaattttacttagtttcacacatcttttccctttccctttctaaaTCCCTCTCCAAATCCTCCATccaaacac	3'	New	gp4	(((((.(((((((((((..((((((((((((((((((((.(((((((((.((((((((.(((.(((((..........))))).))))))))))).))))))))).))))))))))))))))))))..))))))))))).)))))...	145	37.2	-81.7	1.5	5	0	4	3	0	15	5.14874	0	4.2924	3.89112	0	11.8241	middle
735	633	PC-3p-62078_30	AGATTCACCCTTTGTCTCGCGTCT	24	xpSc0054496	+	55877	55972	aatagacaattttaacagatgtgagataaacggtagatcttatatatgtattcaacatgtgAGATTCACCCTTTGTCTCGCGTCTgtgtctcatct	3'	New	gp4	...((((.......((((((((((((((((.(((..(((((((..((((.....)))))))))))..))).)))))))))))))))))))).....	88	35.4	-38.4	1.1	49	44	21	3	0	34	50.4576	37.8848	22.5351	3.89112	0	26.8013	middle
736	634	PC-3p-72672_25	ATTTCTCTTTTCAAATCTCTCCTC	24	Sc0001353	+	281299	281481	ctccgtttctttaatgctgtatttggtttggagatttgggaagagatttggaaagggaaaaggtgtgtgaaactatgtaaaatgtaagtatatttttttcacatttcacctatcttttctATTTCTCTTTTCAAATCTCTCCTCaaatccctcaaccaaacacagcataaaagaaaaggatga	3'	New	gp4	.(((.(((((((.(((((((.(((((((.((.((((((((.(((((((((((((((((((((((((((((((..(((((.........)))))...)))))))...)))))..........))))))))))))))))))).))))))))))..))))))).))))))).))))))).)))...	179	33.3	-78	1.3	8	8	0	5	0	4	8.23798	6.88815	0	6.4852	0	3.1531	low
737	635	PC-3p-165770_9	TTGCTCTGCCTCTTCCCTGGC	21	Sc0000321	+	398936	399114	attggaaaagtgataaaaggtaaagattgaagagggaggatagtcggggacgagacagagcatgagatgagattttcatcaacacatttttgactgataaaatatgtcggtgctcttctcTTGCACTGCCTCTTCCCTGGCtttcctctctcgttctttctctctgtccctttttctat	3'	New	gp4	...(((((((.((((..((..(((((.....(((((((((.(((((((((.(((.(((.(((.((((.(((.....((((.(((.(((((........))))).))).))))))).)))).))).))).))).))))))))).)))))))))..)))))..)).)))).)))))))...	173	41.9	-73.4	1	4	4	0	8	0	10	4.11899	3.44407	0	10.3763	0	7.88274	middle
738	636	PC-3p-136292_11	AATCTCTCCTTAAATCCCCCAACC	24	Sc0001224	+	319473	319624	tgtttcattagggaatttagggagggatttggaaagagaagaggaaaaggtgtgtgaaattaggtgaaatataagtatgttttattcacatttcaccaaccttttccattttcctttccaAATCTCTCCTTAAATCCCCCAACCaaacacat	3'	New	gp4	(((((..((.(((.((((((((((((((((((((((.((((((((((((((..(((((((...(((((((((....)))))))))....)))))))..))))))))).))))))))))))))))))))))))))).))).))..)))))...	149	35.5	-70.6	1.3	7	0	0	0	0	4	7.20823	0	0	0	0	3.1531	low
739	637	PC-3p-81944_21	CAAATCTCTCTTCAAATCCCCT	22	xpSc0056053	+	15352	15507	tgtgtttggttgggggatttggagagagatttggaaagaaaaagagaaaaggtgtgtgaaattaggtgaaatgtaggtatattttattcacatttcacctaatttttcattttctctttcCAAATCTCTCTTCAAATCCCCTaaccaaacacagcg	3'	New	gp4	((((((((((((((((((((((((((((((((((((......(((((((....(((..((((((((((((((((..(((.....)))..))))))))))))))))..))))))))))))))))))))))))))))))))))))))))))))))...	153	35.3	-94.3	1.7	17	14	3	0	3	7	17.5057	12.0543	3.2193	0	2.98467	5.51792	middle
740	638	PC-3p-61303_30	AATCCCTCGTCAAATCCTCTAACC	24	xfSc0001396	-	26150	26301	tgtttggttgggggatttggggaaggaattggaaaagaaaagggaaaaggtgtgtgaaactaggtgaaatgtaagtatattttatttacatttcacctaacttttctttttccctttccaAATCCCTCGTCAAATCCTCTAACCaaacacag	3'	New	gp4	(((((((((((((((((((..((.(((.((((((......((((((((((...((.....(((((((((((((((((.....)))))))))))))))))))....)))))))))))))))).))).))..)))))))))))))))))))...	149	36.8	-76.1	1.4	11	11	4	1.5	3	3	11.3272	9.4712	4.2924	1.94556	2.98467	2.36482	middle
741	639	PC-3p-289649_4	CCTTTCCAAATCCCTCCCCTT	21	Sc0002795	-	65576	65743	taatgctgtgtttggttgggagatttggagagggatttggaaagggaaatggaaaaggtaggtgaaatatgaataaatcatgcctatatttcacatagtttcacacaccttttccctttcCCTTTCCAAATCCCTCCCCATatccctcaaccaaacacaccattgaat	3'	New	gp4	(((((.((((((((((((((.(((.(((.((((((((((((((((((((.(((((((((..(((((((.((((................))))....)))))))..))))))))).)))))))))))))))))))).))).))).)))))))))))))).)))))...	165	39.9	-93.2	1.4	5	1.5	0	4	0	0	5.14874	1.29153	0	5.18816	0	0	low
742	640	PC-3p-182814_8	AGGTTACAAATCTTTCATGATCAT	24	Sc0005296	+	89129	89247	gtatcatgaaaatgatcatgaaagatttgtgacctttggattacatttagaataaagcactacacactaatcaaggtaatctaaAGGTTACAAATCTTTCATGATCATtttcatgaaaa	3'	New	gp4	...(((((((((((((((((((((((((((((((((((((((((..((((................)))).....)))))))))))))))))))))))))))))))))))))))))...	113	28.6	-61.9	1.8	8	4	0	0	0	0	8.23798	3.44407	0	0	0	0	low
743	641	PC-3p-30001_64	ATTCGAGCCATTTGAGCCACAGAA	24	xpSc0057398	+	11094	11266	aattcggaaaatgtttgagggccctaatttttgtggctcaaatggctcaaatttgtcaaaacgacgtcgttttggcaattttgatgttgttttgtactcaaaacgacgtcgttttggcaaATTCGAGCCATTTGAGCCACAGAAattagggttctctatcattgttgaataaa	3'	New	gp4	.(((((...((((...(((..(((((((((((((((((((((((((((.((((((((((((((((((((((((((((((......)))))........))))))))))))))))))))))))).)))))))))))))))))))))))))))..)))...))))..)))))...	169	37.6	-104.1	1.6	55	27	13	4	3	9.5	56.6361	23.2475	13.9503	5.18816	2.98467	7.4886	middle
744	642	PC-3p-128166_12	AATCACTCCTTAAATCTCCCAACC	24	Sc0000025	-	1556667	1556818	tgtttggtttagggatttgaggggggatttggaaagggaaatggaaaaggtaggtgaaatgtgaaaaaaatatacctacatttcacatagtttcacacactttttcccttttccttttcaAATCACTCCTTAAATCTCCCAACCaaacacag	3'	New	gp4	(((((((((..(((((((((((((.((((((((((((((((.(((((((((..(((((((((((((..............))))))))...)))))..))))))))).)))))))))))))))).)))))))))))))..)))))))))...	149	36.8	-74.2	1.3	6	3	0	0	0	6	6.17848	2.58306	0	0	0	4.72964	low
745	643	PC-3p-163715_9	ATTTTGAGCCATTTGAGTCACAAA	24	Sc0005071	+	49773	49932	agtaatgattgaggaccacaatttttgtggctcaaatggttcgaaattgttaaaacgacgtcgttttgagtacaaaacaacttcaaaattgtcaaaacaaggtcattttaataATTTTGAGCCATTTGAGTCACAAAaattgtgaccctcaaacattttc	3'	New	gp4	...((((.((((((..(((((((((((((((((((((((((((((((((((((((.(((...((((((....))))))..........((((....)))).))).)))))))))))))))))))))))))))))))))))))))..)))))).))))...	154	32.5	-74.4	1.4	4.5	2	0	0	0	0	4.63386	1.72204	0	0	0	0	low
746	644	PC-3p-21450_88	CTGTTCACTTCTCTTCTGTCAGT	23	Sc0000868	+	508066	508162	tttgactgacagaagagagtgagcacactacaggcaattgtataaaagtgtatataattgtgggatacgtGTGTTCACTTCTCTTCTGTCAGTttta	3'	New	gp4	...(((((((((((((((((((((((((.....(((((((((((......))))))))))).......)))))))))).)))))))))))))))...	91	37.1	-49.6	1.4	51	39	92	121	23	63	52.5171	33.5797	98.7252	156.942	22.8824	49.6613	middle
747	645	PC-3p-14404_129	GTTATTGGATGGTGATACCACGTG	24	Sc0000757	-	426612	426778	tacaatattggtatcatatcattattgatacgtgatatcatcatttaataataaatctttatggtgagattttctcatttcatttggtagattttctcatttcatttggtattttGTTATTGGATGGTGATACCACGTGtcagtattagcatggtgtcaatgttaca	3'	New	gp4	...(((((((..(((((.....((((((((((((.(((((((((..(((((((((.((..(((((((((...(((((.......))..)))...))))))..)))..))...)))))))))..))))))))).)))))))))))).....)))))..)))))))...	161	28.7	-58.2	1.2	42	55	9	7	4	12	43.2494	47.356	9.6579	9.07927	3.97955	9.45929	middle
748	646	PC-3p-112478_15	AATCCCTCCTCAAATCTTTCAACC	24	Sc0007840	+	369	519	tgtttggttggaagatttggagagggatttggaaaggaaaaaagaaaatatgcgtaaaattaggtgaaatatagatatattttattcacatttcatttaactttttcctttctcttttcaAATCCCTCCTCAAATCTTTCAACCaaacgca	3'	New	gp4	.((((((((((((((((((..(((((((((((((((((((...(((((...........(((..((((((...((((.....))))...))))))..)))..))))).)))).)))))))))))))))..))))))))))))))))))...	147	30.5	-61.6	1.3	8	5	0	0	0	5	8.23798	4.30509	0	0	0	3.94137	low
749	647	PC-5p-137207_11	ATGCCATTTCCACATCATTTTGA	23	Sc0000411	-	236709	236854	aatATGCCATTTCCACATCATTTTGAatgaaatttatatatatatatatatatatattcaggtgtttagcattttctgaaaaggaaaatggtacacaaaatttatatataaaaaattcattcagaatgatgtggcaatggtatttt	5'	New	gp4	...((((((((.(((((((((((((((((((.(((((((((((((((....))))).....((((..(.((((((((.....)))))))).)))))......))))))))))...))))))))))))))))))).))))))))...	140	22.6	-54.1	1.6	14	11	0	0	0	3	14.4165	9.4712	0	0	0	2.36482	middle
750	648	PC-5p-46051_41	AAAATGGGTATGTCTTGGCAC	21	Sc0000784	-	62608	62758	gtttgatttgAAAATGGGTATGTCTTGGTACattggttctgctcttatctgtttctcagttgtgctacatcaaatctaaggcggcaattgaatatgggtatactcttaataaggattgcagatgctctaagacatatccattttcaaatta	5'	New	gp4	...(((((((((((((((((((((((((..((.....(((((...((((..(...(((((((((((.............))).))))))))..)..))))...((((....))))..)))))))..)))))))))))))))))))))))))	148	35.1	-53.9	1	4	3	0	8	11	15	4.11899	2.58306	0	10.3763	10.9438	11.8241	middle
751	649	PC-3p-130242_12	ATTTGAGCCACAAAATTTGGACCC	24	Sc0001297	-	265566	265711	tttgggggccctaattctgttgctcaaatgtggctcaaatggccaaaacgacgtcgttttggccattttgatgttgttttgtactcaaaacgacgtcgttttgaccatttgagccacATTTGAGCCACAAAATTTGGACCCtctac	3'	New	gp4	...(((((.((.((((.(((.(((((((((((((((((((((.(((((((((((((((((((..((...(((...)))..))..))))))))))))))))))).))))))))))))))))))))).))).)))).)).)))))...	140	43.8	-83.1	1.3	6	6	0	0	0	0	6.17848	5.16611	0	0	0	0	low
752	650	PC-3p-146453_10	AATCCTTCTCCAAATCTCCCAACC	24	xfSc0000108	+	197125	197274	tgtttggttggggaatttgatgagggatttggaaagagaaatggaaaaagtaggtaaaatgtgaataaaacatacctatatttcacttagtttcacacacctttttcctttctctttccaAATCCTTCTCCAAATCTCCCAACCaaaaac	3'	New	gp4	..((((((((((..(((((..((((((((((((((((((((.((((((((...((.(((((((((................)))))...)))).))....))))))))))))))))))))))))))))..)))))..))))))))))...	145	34.7	-69	1.3	7	0	0	0	0	9	7.20823	0	0	0	0	7.09447	low
753	651	PC-3p-70173_26	TCCCCTCTCAAATCCCTCAAC	21	Sc0001572	-	195929	196074	tttggttgagagatttagggagtgatttggaaagggaaaaagaaaaagtgtgtaaaactatgtgaaatgtaggtatatttttttcacatttcacctaccttttccattttcctttccaaaTCCCCTCTCAAATCCCTCACCcaaac	3'	New	gp4	(((((.((((.(((((.(((((.((((((((((((((((..(((((.((((.....))...(((((((((..(.........)..)))))))))..)).)))))..))))))))))))))))..)))))))))).)))).))))).	145	35.6	-54.8	1.1	4	6	0	4	10	18	4.11899	5.16611	0	5.18816	9.94888	14.1889	middle
754	652	PC-3p-166627_9	ATTTCTCTTTTCAAATTCCTCATC	24	Sc0001528	-	178842	179000	cactgtgtttggttggggaatttgaggaggaatttggaaaagaaaagggaaaaggtgtgtgaaactaagtaaaatataggtatgttttattcacatttcacttatctttttcATTTCTCTTTTCAAATTCCTCATCaaatcctccaaccaaacacacca	3'	New	gp4	...(((((((((((((((.((((((.(((((((((((((((((((..(((((((((..((((((...((((((((((....))))))))))....))))))..))))))))).))))).)))))))))))))).)))))).)))))))))))))))...	153	34	-72.8	1.3	10	6	3	0	0	0	10.2975	5.16611	3.2193	0	0	0	middle
755	653	PC-5p-40823_47	TCAATGGCTTTTGTTATCCCA	21	Sc0000993	+	244097	244312	gcaaaggcaatgcatggcaagcaattagccaccctatctttaatagatctccagaactaaattctttcctctgcgTCAATGACTTTTGTTATCCCActttcatcacaatgattcatctaagagggataacaaaagtcattgtcgtgaaagaaagaatatagttcgggagatttattaaagatatggaaactcattgcttgcgatgcatcgccttac	5'	New	gp4	...(((((.((((((.(((((((((.((...((.((((((((((((((((((.((((((.((((((((....(((.(((((((((((((((((((.(((..(((.....)))......))).))))))))))))))))))).)))....)))))))).)))))).)))))))))))))))))).))...)).))))))))).)))))).)))))..	211	38	-112.6	1.4	13	7.5	11	1.5	2.5	4	13.3867	6.45764	11.8041	1.94556	2.48722	3.1531	middle
756	654	PC-5p-60400_31	AGTATTTGCGACGGCATCATTTGC	24	Sc0001828	+	364765	364987	agacggaattatttgcgacggcacagttgccgtctcaaaaagtcactttttgcgacggtagaaaataccgtctcaaaaaagcagAGTATTTGCGACGGCATCATTTGCcgtctcaaaaaagcagagcatttgcgacggcactaaataccgtcgcaaatactctcattttttgagacggcaaatagtgccgtcgcaaatgctctgcttttttgagacggtaaat	5'	New	gp4	.(((.......((((.(((((((....))))))).))))..)))..(((((((....))))))).(((((((((((((((((((((((((((((((((((..((((((((((((((((((..((((.(((((((((((.........))))))))))).))))..))))))))))))))))))..)))))))))))))))))))))))))))))))))))...	155	43.9	-137.6	1.4	19	11	4	0	0	0	19.5652	9.4712	4.2924	0	0	0	middle
757	655	PC-3p-22738_83	TTCCCTCCCCAAATCCCCACT	21	xpSc0053237	+	1222	1370	taagctgtgtttgggtttgaggagggatttgcggagggaaagggaaagggaaaaggaaaggagaagtgaatgaaatagaagctaattctttttcacttttcctTTCCCTCCCCAAATCCCCACTcaatctttgatccaaacacagcctt	3'	New	gp4	...((((((((((((((((((..((((((((.((((((((((((((((.(((((((((...((..................))..))))))))).)))))))))))))))).))))))))..))))......))))))))))))))...	143	43	-77	1.2	12.5	8	0	12	25	60.5	12.8718	6.88815	0	15.5645	24.8722	47.6906	middle
758	656	PC-3p-178544_8	AATCACGACCCAAATCCATGATCC	24	Sc0002972	-	225114	225258	tttaggctgtgtttggatctgaatttgggtagagatttggaaaaaacaatggagaacgttggtaaaatgtgaataaaataaggttacctttttccttttccttttcaAATCTCGACCCAAATCCATGATCCaaacactgccttaa	3'	New	gp4	...((((.(((((((((((((.((((((((.((((((((((((.......((((((....(((((..(((.......)))...))))).))))))......)))))))))))).)))))))).)).))))))))))).))))...	139	35.2	-60.7	1.2	6	5	0	0	0	0	6.17848	4.30509	0	0	0	0	low
759	657	PC-3p-127793_12	AGTTTTGAGCCATTTGAGCCACTG	24	Sc0000118	+	1164865	1165000	ctagagggtcacaaaaacagtagttcaaatggctcaaaactgtcaaaacgacgtcgttttggatgcaaaacaacgcaaaacgacgtcgttttgacAGTTTTGAGCCATTTGAGCCACTGattttgtgactctcaaa	3'	New	gp4	...(((((((((((((.((((.(((((((((((((((((((((((((((((((((((((((..((.....))...))))))))))))))))))))))))))))))))))))))).)))).)))))))))))))...	130	41.2	-92.3	1.6	4	2	0	0	0	0	4.11899	1.72204	0	0	0	0	low
760	658	PC-5p-163989_9	AAGTTTTCTAGAGTGGTACATTGT	24	Sc0000911	-	362288	362455	gagcaagtatcctctagagtttttttttcttaAAGTTTTCTAGAGTGGTACATTGTgtggttgagatttaatgacaagtcacatcaatttttcagtattaaatctcaaccacacaatacaccactttaggaaactttagaaaaaaaacactctagaggatccttggtg	5'	New	gp4	...((((.(((((((((((((((((((((.(((((((((((((((((((..(((((((((((((((((((((((.((((.......)))).)))...))))))))))))))))))))..)))))))))))))))))))))))))))).)))))))))))).))))...	162	33.3	-88.4	1.6	9	3	0	0	0	0	9.26772	2.58306	0	0	0	0	low
761	659	PC-3p-222148_6	AAATGTCACAAATCTTTCATGACC	24	Sc0001341	+	189989	190184	atatttttaaaagagaaatgttagagatcatgaaaattttgtcatgaaaaggattatgaaaaatttatgacctttagattaccttgattagtgtgtggtgctttattataaatgtaatacAAATGTCACAAATCTTTCATGACCattttcatgaaagacttttcatgatacctagcattgttgtttgcaaaaaggc	3'	New	gp4	...(((((.(((.(..((((((((..((((((((((.(((.(((((((((((.((((((((.((((.((((.(((..(((((.((...(((((..........)))))..)).)))))..))).)))).)))).)))))))))).))))))))).))).))))))))))..))))))))..).)))..)))))...	190	27.6	-54.1	1	11	0	0	0	0	0	11.3272	0	0	0	0	0	middle
762	660	PC-3p-38503_50	AATTCCTTCCCAAATCCTCCAACC	24	Sc0001201	+	225580	225729	tttggttgggaaatttgggaagggatttggaaagggcaagggaaagggaaagggaaaaggtaaaggtaaaatatacttacatttcactagtttcacacaccttttctcttttccttttcaAATTCCTTCCCAAATCCTCCAACCaaacat	3'	New	gp4	((((((((((..(((((((((((((((((((((((..(((((((((((....((((..((((((.((((.......)))).))).)))..)))).....)))))))))))..)))))))))))))))))))))))..))))))))))...	147	38	-71.4	1.3	37	12	4	0	5	17	38.1006	10.3322	4.2924	0	4.97444	13.4007	middle
763	661	PC-3p-91156_19	AATCCCTCTTCAAATTCCTCAACC	24	xfSc0035506	+	674	825	tgtttggttggaggatttggggagggatttggaaagggaaagggaaagggtgtgtgaaactatgtgaaatgtaggtatatttttttcacatttcacctaccttttccatttctctttccaAATCCCTCTTCAAATTCCTCAACCaaacaaac	3'	New	gp4	((((((((((..(((((((..((((((((((((((((((((.(((((((((..(((((...((((((((..............)))))))))))))..))))))))).))))))))))))))))))))..)))))))..))))))))))...	149	38.8	-88.7	1.5	4	6	6	0	0	6	4.11899	5.16611	6.4386	0	0	4.72964	low
764	662	PC-5p-9562_190	TTGGCTCATGGATTTGGGGAG	21	Sc0000007	-	673358	673506	aagtgtgtTTGGCTCATGGATTTGGGTAGcgatttggaaacggaaagagaaaaggtgtttgaaatgtagttacatttcaaacaccttttcacatactttttccttttcctttccaaattcctatacaaatccatgaaccaaacacaata	5'	New	gp4	...(((((((((.(((((((((((..(((..(((((((((.((((((.(((((((((((((((((((....)))))))))))))))))))............)))))).)))))))))..)))..))))))))))).)))))))))...	143	34.9	-74.9	1.4	15	7	12.5	15.5	21	24	15.4462	6.02713	13.4138	20.1041	20.8927	18.9186	middle
765	663	PC-3p-178831_8	CTTGCACCTCTATGAAAATTGC	22	xfSc0000078	+	366421	366599	tttagggcaaagtgagattttgtgagaacaactcaaaataattgcactttcatagaggtacaagtgggtgttgtgctctacgacttgcacttgcacttgcactggacatagacccaCTTGCACCTCTATGAAAATTGCatttattttgtatgttcccactaaaccacaatttccctttc	3'	New	gp4	...((((.(((.((...(((.(((.(((((...((((((((.((((.((((((((((((.(((((((((.(((((.(((((((..(((....))).)))...)))))))))))))))))).))))))))))))..)))).))))))))..))))).))).)))...)).)))))))...	173	39.7	-69	1	8	7	0	0	0	0	8.23798	6.02713	0	0	0	0	low
766	664	PC-5p-101751_16	TATCGTTGACCTATTCATCCA	21	Sc0000189	-	890941	891124	tacatcaagtagaacatgtttgtaaaaaatcaaattaatcggaTATCGTTTACCTATTCATCCActcacatttgtatctacaaaaataaataataattgtgatttaaattatttaaatagatacaaatgtgagtagatgaataggtaaatgatatctgatttttgcaagcatgttttacttgat	5'	New	gp4	...(((((((((((((((((((((((..........((((((((((((((((((((((((((.(((((((((((((((((......((((((((.............))))))))..))))))))))))))))).)))))))))))))))))))))))))))))))))))))))))))))))))	181	24.5	-91.6	2	2	4.5	1.5	0	0	0	2.05949	3.87458	1.60965	0	0	0	low
767	665	PC-3p-265179_4	AATCCCTCCTCAAATCCTCTAGTC	24	xfSc0003699	+	3332	3485	atactgtgtttgattggtggatttgacgagagatttggaaagataaaaggaaaagttaggtgaaatgtgaataaaatatacttatatttcacctagtttcacgctacttttcctttccaAATCCCTCCTCAAATCCTCTAGTCaaacacagcgt	3'	New	gp4	...((((((((((((((.((((((((.(((.(((((((((.......(((((((((((((((((((((((.((.....)).))))))))))))))..........)))))))))))))))))).))).)))))))).))))))))))))))...	148	35.1	-72.3	1.3	0	7	0	0	0	6	0	6.02713	0	0	0	4.72964	low
768	666	PC-3p-80584_22	AGAAAATTTGGTGTCCCTATCATT	24	xfSc0001434	-	35121	35269	ttcttaagaaaaatgctagaggtcccaaattttctaccaaataaatgaccaaatgtctcacatggtgcggaccccacacccatgtgagacatttggtcatttgtttggtAGAAAATTTGGTGTCCCTATCATTacccatttcttaatag	3'	New	gp4	...((((((((((((.(((.((..(((((((((((((((((((((((((((((((((((((((((((.((...)).)).)))))))))))))))))))))))))))))))))))))))))..)).))).)))).....))))))))...	143	38.3	-81.9	1.4	9	5	8	0	0	0	9.26772	4.30509	8.5848	0	0	0	low
769	667	PC-3p-165435_9	AATCCCTCCCCAAACCCTCCAACC	24	Sc0003996	+	129344	129495	tgtttggttgagggatttgaggagggaattggaaagggaaaggaaaaagttagatgaaatgtaaataaaatataaatacatgtcacctagtttcacacacatttttccattccttttccaAATCCCTCCCCAAACCCTCCAACCaaacacag	3'	New	gp4	((((((((((((((.((((.(((((((.((((((((((((.((((((((((((.(((.(((((.............))))).))).))).........)).))))))).)))))))))))).))))))).))))))))).)))))))))...	149	37.5	-69.1	1.2	9	6	0	0	0	0	9.26772	5.16611	0	0	0	0	low
770	668	PC-3p-121045_13	AACTCATTAGTGGTGCTTTAGAGT	24	Sc0000435	-	585126	585274	agaccattaaaagtggtgctttaaaagcaccactagtgatgtggtagtggacgggacccactgcttatgtcttttcttttttttcttttttttttttaaatgcttgccAACTCATTAGTGGTGCTTTAGAGTatcacttttagtgggat	3'	New	gp4	...((((((((((((((((((((((.(((((((((((((..((((((((((..((((...........))))..)))........................)).)))))..)))))))))))))))))))))))))))))))))))...	143	36.9	-61.8	1.1	9	4	0	0	0	0	9.26772	3.44407	0	0	0	0	low
771	669	PC-5p-13233_139	CCTTTACTCTTTCCCTTTCCA	21	Sc0002386	+	80489	80702	atttggaaagagaaagagaaaagttaggtgaaatgtgaataaaacatacttatattttactaagtttcacacaCCTTTACTCTTTCCCTTTCTAaatccctcgctaaatcctttaaccagatttggaaaggaaaaggaaaaatgtgtgtgaaattaggtgaaatataagtgtgctttattcacatttcacctacctttttcatttttctttcta	5'	New	gp4	...((((((((((((..((((((.(((((((((((((((((((.((((((((((((((((..((((((((((((.(((..(((((.((((((((((((.....................)))))))))))).)))))..))).))))))))))))..)))))))))))))))).))))))))))))))))))).))))))..))))))))))))	211	30.4	-101.9	1.6	11	11.5	12.5	18	13.5	19	11.3272	9.90171	13.4138	23.3467	13.431	14.9772	middle
772	670	PC-3p-106399_16	CATATGCTTTCTGATGTCCGA	21	Sc0000229	-	1004647	1004832	atgatttattcagtatatcatgcttgtaaaaaattaagttgatcggatatcagaaagtatgtgtttgaaaaattgaactaaacactattttttaaagaatttaataaacagttttccgaaCATATGCTTTCTGATATCCGAtcaatttgattttttacaggtatgatatactgaataaatcataaa	3'	New	gp4	(((((((((((((((((((((((((((((((((((((((((((((((((((((((((((((((((((.(((((((...........(((((....)))))........))))))).)))))))))))))))))))))))))))))))))))))))))))))))))))))))))))))))))))...	183	24.2	-101.7	2.3	0	0	0	0	12	4	0	0	0	0	11.9387	3.1531	middle
773	671	PC-3p-25146_75	AACCATACAACACACCACTCTAGG	24	Sc0000834	+	540917	541084	caccaaggattttctagagtttttttttcctaaagtttcctaaagtggtgtgttgtatgggtgagatttaatgctaaaaaattgatatgacttgtcattaaatctcAACCATACAACACACCACTCTAGGaaactttagggaaaaaaaactctagaggatccttgctc	3'	New	gp4	...(((((((..((((((((((((((((((((((((((((((.(((((((((((((((((.(((((((((((((...................).)))))))))))).))))))))))))))))).))))))))))))))))))))))))))))))..)))))))...	162	34.5	-103.9	1.8	19.5	10.5	2.5	4	3.5	0	20.0801	9.04069	2.68275	5.18816	3.48211	0	middle
774	672	PC-3p-193480_7	AATTCGAGCCATTCGAACCTGGGA	24	Sc0001493	-	133084	133233	aaaaatgattggtggccacaatattcgcggctcaaatggctcgaattaaccaaaacgacgtcgttttgtgttgttttgtgtccaaaacgacgccgttttggtcAATTCGAGCCATTCGAGCCTGGGAaattcgggccctctatcattgct	3'	New	gp4	...((((((.(..((((......(((.((((((.(((((((((((((.(((((((((.((((((((((..(........)..)))))))))).))))))))).))))))))))))).))))).).))).....))))..).))))))...	144	46	-76.3	1.1	10	4	0	0	0	0	10.2975	3.44407	0	0	0	0	middle
775	673	PC-3p-102350_16	TCCCTTCTCAAATCCCCCAT	20	xpSc0055213	-	17746	17895	tttggttggggggtttggggaaggatttgaaaagagaaaggaaaaatgtgtgtgaaactagatgaaatgtaggtatattttattcacatttcacctaacttttctctttctctttccaaaTCCCTTCTCAAATCCTCCATagtccgataa	3'	New	gp4	.((((.(((((((((((((((.(((((((.((((((((((..((((.((..((((((...((((((((((....))))))))))....))))))...))))))..)))))))))).))))))).)))))))))))))))....))))...	146	36	-62.7	1.2	0	8	4	3	4	3	0	6.88815	4.2924	3.89112	3.97955	2.36482	low
[truncated: 88 more rows]
