# Supplementary material for: Identification of Regulatory Networks of MicroRNAs and Their Targets in Response to Colletotrichum gloeosporioides in Tea Plant (Camellia sinensis L.)
Source: Front Plant Sci. 2019 Sep 12;10:1096. doi: 10.3389/fpls.2019.01096 (PMC6751461; doi:10.3389/fpls.2019.01096)
Supplement: Supplementary file 4 [file Table_4.xls]

## Sheet: Differential known miRNAs
Table S4: Differential expression of conserved miRNAs from small RNA libraries in this study.
miRNA name	miRNA sequences	fold_change (Group2(mean)/Group1(mean))	log2(fold_change)	pvalue(t_test)	Group1(mean)	Group2(mean)	Group1			Group2			Group1			Group2			Expression level
							Group1/CK1(norm)	Group1/CK2(norm)	Group1/CK3(norm)	Group2/Cg4d1(norm)	Group2/Cg4d2(norm)	Group2/Cg4d3(norm)	Group1/CK1(raw)	Group1/CK2(raw)	Group1/CK3(raw)	Group2/Cg4d1(raw)	Group2/Cg4d2(raw)	Group2/Cg4d3(raw)
csn-miR167c_R-1	TGAAGCTGCCAGCATGATCTG	2.66775	1.41562	0.000201409	2546.03	6792.16	2293.25	2524.72	2820.11	6516.65	7228.86	6630.96	2227	2932.25	2628	5024.25	7266	8412	high
csn-miR169b-3p_L+1R-1_2ss13CA16C-	CGGCAAGTTGTCATTGGCTAC	1.82442	0.867441	0.00501959	567.392	1035.16	579.233	636.293	486.651	911.17	1105.32	1089	562.5	739	453.5	702.5	1111	1381.5	middle
csn-miR408-p5_2ss19GT20CT	TGCACTGCCTCTTCCCTGTT	inf	inf	0.00588161	0	7.9372	0	0	0	7.78224	6.96422	9.06515	0	0	0	6	7	11.5	low
csn-miR168	TCGCTTGGTGCAGGTCGGGAA	1.50784	0.59248	0.0063913	5914.84	8918.61	5656.92	5671.53	6416.07	8880.83	8903.26	8971.74	5493.5	6587	5979	6847	8949	11381.5	high
csn-miR5083-p5_1ss19GC	ATGGATCCTTCTGAGCCTC	4.25136	2.08793	0.00665304	9.33578	39.6898	10.8123	8.61018	8.5848	40.2082	34.3236	44.5375	10.5	10	8	31	34.5	56.5	middle
csn-miR2629g-p3_2ss13TC18GA	CTGCCGAAGTTTCCCTCA	inf	inf	0.00735107	0	3.60572	0	0	0	3.89112	2.98467	3.94137	0	0	0	3	3	5	low
csn-miR1877-p5_2ss13GC20AC	CTCTCATTGCTTCCATGTCCT	4.62403	2.20915	0.00777199	1.22305	5.65541	2.05949	0	1.60965	5.18816	5.47189	6.30619	2	0	1.5	4	5.5	8	low
csn-miR3630-3p_L-3_1ss22CT	GGGAATCTCTCTGATGCAT	4.06946	2.02484	0.00839145	3.45784	14.0715	3.60411	3.01356	3.75585	13.6189	12.4361	16.1596	3.5	3.5	3.5	10.5	12.5	20.5	middle
csn-miR168_1ss5TG	TCGCGTGGTGCAGGTCGGGAA	2.35926	1.23833	0.00845711	54.576	128.759	39.6453	47.356	76.7267	113.491	148.238	124.547	38.5	55	71.5	87.5	149	158	middle
csn-miR403d-p5_1ss14AG	AGTTTGTGCGCGAGTCCAACC	4.14606	2.05174	0.00911817	54.382	225.471	63.8443	49.9391	49.3626	220.497	194.998	260.919	62	58	46	170	196	331	middle
csn-miR167c_L-1R+1	GAAGCTGCCAGCATGATCTGA	1.76092	0.816332	0.00985694	12.3242	21.702	9.7826	13.7763	13.4138	20.7526	21.8875	22.4658	9.5	16	12.5	16	22	28.5	middle
csn-miR169b-p3_1ss8TC	TCTCATGCTAGGCCTTCTCTTC	inf	inf	0.0111245	0	7.47419	0	0	0	7.78224	5.96933	8.67102	0	0	0	6	6	11	low
csn-miR828-3p_1ss22AG	AGATGCTCATTTGAGCAAGCAG	4.77651	2.25596	0.0113195	5.31037	25.365	9.26772	3.44407	3.2193	27.2378	18.9029	29.9544	9	4	3	21	19	38	middle
csn-miR8757b-p5_1ss18GC	ATTTTGGGTTGGGTCGAC	2.37553	1.24825	0.0114574	1.79706	4.26898	2.05949	1.72204	1.60965	3.89112	4.97444	3.94137	2	2	1.5	3	5	5	low
csn-miR172c-p5	CAGATGCGGCATCATCAAGAT	4.03885	2.01394	0.0125447	2.31193	9.33755	3.60411	1.72204	1.60965	11.6734	8.45655	7.88274	3.5	2	1.5	9	8.5	10	middle
csn-miR5368-p3_1ss15CT	ATTCTAACCTTGTGTCAGGA	1.98922	0.992201	0.0131548	97.7359	194.418	126.144	66.7289	100.335	168.615	216.388	198.251	122.5	77.5	93.5	130	217.5	251.5	middle
csn-miR5072_L-4_1ss12CT	TCCCCAGTGGAGTCGCCA	3.9413	1.97867	0.0136983	7.57484	29.8548	6.17848	6.88815	9.6579	27.2378	36.3134	26.013	6	8	9	21	36.5	33	middle
csn-miR156f-p3_2ss3CT22CT	TGTTCACTTCTCTTCTGTCAGT	2.0013	1.00094	0.0150896	979.824	1960.92	1050.86	823.564	1065.05	1801.59	1785.33	2295.85	1020.5	956.5	992.5	1389	1794.5	2912.5	high
csn-miR2592bj-p3_1ss12TC	ATTCCCACTGTCCCTGTC	7.72144	2.94887	0.0155175	0.574012	4.4322	0	1.72204	0	5.18816	2.98467	5.12378	0	2	0	4	3	6.5	low
csn-miR535-p3_1ss2GA	CAAGCGTGCTCTCTCTCGTTG	2.72987	1.44883	0.0156755	3.85089	10.5124	3.60411	2.58306	5.3655	9.07927	9.45144	13.0065	3.5	3	5	7	9.5	16.5	middle
csn-miR894_L-3R+1	TTCACGTCGGGTTCACCA	2.16587	1.11495	0.0158099	205.382	444.831	170.938	174.787	270.421	391.706	535.25	407.538	166	203	252	302	538	517	middle
csn-miR168-p5	CTCTAATTCGCTTGGTGCAGG	1.93342	0.951154	0.017057	5.94941	11.5027	4.63386	5.16611	8.04825	12.3219	11.9387	10.2476	4.5	6	7.5	9.5	12	13	middle
csn-miR9777-p3_2ss4CT17TA	TGCTGTGATGATTGCTATA	6.31729	2.65931	0.0176259	0.53655	3.38954	0	0	1.60965	3.2426	2.98467	3.94137	0	0	1.5	2.5	3	5	low
csn-miR167c_R+1	TGAAGCTGCCAGCATGATCTGA	1.41533	0.501134	0.0184977	1266.9	1793.07	1342.28	1398.72	1059.69	1818.45	1646.04	1914.72	1303.5	1624.5	987.5	1402	1654.5	2429	high
csn-miR167b-5p_R+1	TGAAGCTGCCAGCATGATCTGA	1.41533	0.501134	0.0184977	1266.9	1793.07	1342.28	1398.72	1059.69	1818.45	1646.04	1914.72	1303.5	1624.5	987.5	1402	1654.5	2429	high
csn-miR5083_R-1	AGACTACAATTATCTGATC	inf	inf	0.0191806	0	6.49203	0	0	0	7.78224	6.96422	4.72964	0	0	0	6	7	6	low
csn-miR2586a-p5_1ss13AG	CGGACACGACACGGACACGCC	inf	inf	0.0217617	0	5.5547	0	0	0	3.89112	6.46677	6.30619	0	0	0	3	6.5	8	low
csn-miR2586a-p3_1ss13AG	CGGACACGACACGGACACGCC	inf	inf	0.0217617	0	5.5547	0	0	0	3.89112	6.46677	6.30619	0	0	0	3	6.5	8	low
csn-miR168c-3p_L+1R-1_1ss21AT	TCCCGCCTTGCATCAACTGAT	4.01359	2.00489	0.0276889	3.041	12.2054	5.14874	1.29153	2.68275	16.213	10.9438	9.45929	5	1.5	2.5	12.5	11	12	middle
csn-miR169i-p3_1ss6GA	AGGCAATCTCCTTGGCTAAC	17.2483	4.10838	0.0277755	163.403	2818.43	156.007	159.288	174.915	1926.1	3391.08	3138.12	151.5	185	163	1485	3408.5	3981	high
csn-miR535a	TGACAACGAGAGAGAGCACGC	1.75973	0.815354	0.0297258	22691.5	39930.9	18235.8	20063.9	29774.8	37539.6	40514.3	41738.7	17709	23302.5	27746.5	28942.5	40722.5	52949.5	high
csn-miR167f-3p_2ss8GA15TC	AGATCATATGGCAGCTTCACC	2.3637	1.24105	0.0300998	528.845	1250.03	476.773	569.994	539.769	1035.04	1504.27	1210.79	463	662	503	798	1512	1536	middle
csn-miR2586b-p3_2ss6AC19GC	TGGACCCGACACGTGTCCCAC	4.78864	2.25962	0.0315329	1.54752	7.4105	2.05949	2.58306	0	5.18816	9.94888	7.09447	2	3	0	4	10	9	low
csn-miR858a_L-1R+1	TTCGTTGTCTGTTCGACCTTG	1.37401	0.458396	0.0369379	12005.8	16496.1	13763.6	11523.9	10729.9	18658.6	15837.6	14992.2	13366	13384	9999	14385.5	15919	19019	high
csn-miR172c-p3_1ss9TC	TGGGAATCCTGATGATGCTGC	2.40097	1.26362	0.0378202	8.76756	21.0506	5.66361	12.0543	8.5848	25.2923	22.8824	14.9772	5.5	14	8	19.5	23	19	middle
csn-miR391-p5_2ss16CT20GA	ACGCAGGAGAGATGATGCCAA	3.76232	1.91162	0.0378556	36.3267	136.673	28.8329	31.8577	48.2895	115.436	181.07	113.511	28	37	45	89	182	144	middle
csn-miR396b-p3_2ss7AG20AG	TTCAAGGAAGCTGTGGGAAG	1.59299	0.671739	0.0394941	269.687	429.609	317.162	250.987	240.911	357.983	430.289	500.554	308	291.5	224.5	276	432.5	635	middle
csn-miR482b-p5_2ss3TA19TA	CCAATCCCTCCCATTCCTA	2.80026	1.48556	0.0426728	8.39619	23.5115	4.11899	12.4848	8.5848	17.51	21.8875	31.1368	4	14.5	8	13.5	22	39.5	middle
csn-miR5083_L-1	GACTACAATTATCTGATCA	4.29428	2.10242	0.042889	3.03879	13.0494	3.08924	6.02713	0	9.07927	11.9387	18.1303	3	7	0	7	12	23	middle
csn-miR397a_1ss10GC	TCATTGAGTCCAGCGTTGATG	6.53536	2.70827	0.0441877	2.10285	13.7429	3.08924	0	3.2193	19.4556	9.94888	11.8241	3	0	3	15	10	15	middle
csn-miR408b-5p	ACGGGGACGAGACAGAGCATG	4.77697	2.2561	0.0451041	12.7353	60.836	13.3867	10.3322	14.4869	70.6886	39.2981	72.5212	13	12	13.5	54.5	39.5	92	middle
csn-miR8175_L-2	TCCCCGGCAACGGCGCCA	2.34664	1.2306	0.045874	9.76284	22.9099	8.23798	6.02713	15.0234	20.7526	29.8467	18.1303	8	7	14	16	30	23	middle
csn-miR169e_1ss21GC	TAGCCAAGGATGACTTGCCTCC	7.25503	2.85898	0.0461082	55.3085	401.265	62.2997	60.7018	42.924	254.22	431.284	518.29	60.5	70.5	40	196	433.5	657.5	middle
csn-miR169a_R-2	CAGCCAAGGATGACTTGCC	4.74325	2.24587	0.0474819	1.4308	6.78664	0	0	4.2924	9.07927	4.97444	6.30619	0	0	4	7	5	8	low
csn-miR6300-p5_1ss8AG	TAGTGGTGAGTATTCCCGCC	inf	inf	0.0497683	0	5.09805	0	0	0	3.89112	7.46166	3.94137	0	0	0	3	7.5	5	low
csn-miR5368-p5_1ss16CT	AATTCTAACCTTGTGTCAGGA	2.10977	1.07709	0.0500571	102.755	216.79	158.066	61.1323	89.0673	216.606	166.146	267.619	153.5	71	83	167	167	339.5	middle
csn-miR168c-3p_R+1	CCCGCCTTGCATCAACTGAATT	1.73642	0.796116	0.0511052	25.9477	45.0561	36.0411	19.8034	21.9986	48.639	42.7802	43.7492	35	23	20.5	37.5	43	55.5	middle
csn-miR169r-5p_R+1_2ss10AT21GA	TAGCCAAGGTTGATTTGCCTAT	1.87878	0.909794	0.0573279	16.2212	30.4761	17.5057	12.9153	18.2427	25.9408	26.862	38.6254	17	15	17	20	27	49	middle
csn-miR408b-5p_1ss8CT	ACGGGGATGAGACAGAGCATG	21.3674	4.41734	0.0591438	16.3914	350.242	13.3867	18.0814	17.7062	424.78	180.572	445.375	13	21	16.5	327.5	181.5	565	middle
csn-miR408-p3_2ss18GT19GT	TGCACTGCCTCTTCCCTTT	15.5437	3.95826	0.0617694	0.430509	6.6917	0	1.29153	0	7.13372	3.48211	9.45929	0	1.5	0	5.5	3.5	12	low
csn-miR5368-p3_1ss16CT	AATTCTAACCTTGTGTCAGGAC	1.65981	0.731014	0.0625659	145.472	241.456	201.316	104.183	130.918	204.284	238.276	281.808	195.5	121	122	157.5	239.5	357.5	middle
csn-miR6300_R+5_2	GTCGTTGTAGTATAGTGGTGAGT	2.60807	1.38298	0.0626095	6.01343	15.6835	10.2975	5.59662	2.1462	21.4011	13.431	12.2182	10	6.5	2	16.5	13.5	15.5	middle
csn-miR6300_R+5_1	GTCGTTGTAGTATAGTGGTAAGT	2.60807	1.38298	0.0626095	6.01343	15.6835	10.2975	5.59662	2.1462	21.4011	13.431	12.2182	10	6.5	2	16.5	13.5	15.5	middle
csn-miR156a-p3_1ss22CT	TGCTCACTTCTCTTCTGTCATT	2.80566	1.48834	0.0632418	37.153	104.239	36.0411	29.2746	46.1433	98.575	74.6166	139.525	35	34	43	76	75	177	middle
csn-miR5368-p5_1ss3TC	TTCCCTGGGATTGGCTTTG	2.8121	1.49165	0.0707053	1.11056	3.12301	0	1.72204	1.60965	1.94556	3.48211	3.94137	0	2	1.5	1.5	3.5	5	low
csn-miR9777-p5_2ss4CT17TA	TGCTGTGATGATTGCTATACT	5.47697	2.45338	0.0716756	3.11537	17.0628	0	3.44407	5.90205	8.43076	19.8978	22.86	0	4	5.5	6.5	20	29	middle
csn-miR164b-p3	CATGTGCCCGTCTTCCCCATC	1.32535	0.406372	0.0751548	1234.77	1636.5	1205.83	1048.72	1449.76	1426.74	1845.52	1637.25	1171	1218	1351	1100	1855	2077	high
csn-miR398b	TGTGTTCTCAGGTCGCCCCTG	11.4294	3.51468	0.0752761	125.715	1436.85	96.7962	164.455	115.895	1662.8	690.453	1957.28	94	191	108	1282	694	2483	high
csn-miR8651-p3_2ss17AC20TA	ATGGCTCTGATACCAACTAAG	inf	inf	0.0781082	0	4.40154	0	0	0	6.4852	1.98978	4.72964	0	0	0	5	2	6	low
csn-miR8651-p5_2ss17AC20TA	ATGGCTCTGATACCAACTAAG	inf	inf	0.0781082	0	4.40154	0	0	0	6.4852	1.98978	4.72964	0	0	0	5	2	6	low
csn-miR8175-p5_2ss14TC18AC	GTGGTAAGTATTCCCGCCT	2.10127	1.07126	0.0784721	25.9288	54.4834	44.794	16.3593	16.6331	63.5549	59.6933	40.202	43.5	19	15.5	49	60	51	middle
csn-miR390-3p	CGCTGTCCATCCTGAGTTTCA	inf	inf	0.0786038	0	12.9985	0	0	0	6.4852	19.8978	12.6124	0	0	0	5	20	16	middle
csn-miR5267c-p3_2ss2AT17AG	CTAGTGAATAACTAAAGA	2.25592	1.17372	0.0792998	13.9909	31.5623	8.23798	13.3458	20.3889	20.1041	40.293	34.2899	8	15.5	19	15.5	40.5	43.5	middle
csn-miR159b-p5_1ss10GT	AGCTGCTGATCTATGGATCCCT	1.38647	0.471419	0.0798392	88.6297	122.883	76.2013	96.8646	92.8232	99.872	130.828	137.948	74	112.5	86.5	77	131.5	175	middle
csn-miR5368-p5_1ss6TC_1	CTGTTCCCTGGGATTGGCTTT	2.15344	1.10665	0.0820803	7.47525	16.0975	8.23798	7.74917	6.4386	16.8615	20.3952	11.0358	8	9	6	13	20.5	14	middle
csn-miR5368-p5_1ss6TC_2	CTGTTCCCTGGGATTGGCTTTG	2.15344	1.10665	0.0820803	7.47525	16.0975	8.23798	7.74917	6.4386	16.8615	20.3952	11.0358	8	9	6	13	20.5	14	middle
csn-miR398_2ss9CT21GC	GGAGCGACTTGAGATCACATC	7.89226	2.98044	0.0882909	4.32397	34.1259	3.08924	3.44407	6.4386	44.0993	14.9233	43.3551	3	4	6	34	15	55	middle
csn-miR477-p5_2ss16GA21TC	CACTCTCCCTCAAAGACTTCCA	8.51215	3.08952	0.0889521	27.9024	237.51	12.357	32.7187	38.6316	107.006	270.112	335.411	12	38	36	82.5	271.5	425.5	middle
csn-miR3627a-p5_2ss7TA18TC	TGTCGCAGGAAAGATGGCACC	2.53537	1.3422	0.0895737	102.82	260.687	60.2402	77.0611	171.159	215.309	193.506	373.248	58.5	89.5	159.5	166	194.5	473.5	middle
csn-miR399d-p5_2ss18TC19TA	TTGCCCTACGACTGCTTCAGC	4.23371	2.08192	0.0928656	1.82596	7.73059	0	1.72204	3.75585	7.78224	3.97955	11.43	0	2	3.5	6	4	14.5	middle
csn-miR2111-3p_2ss7TG21TC	GTCCTCGGGTTGCAGATTACC	9.93226	3.31212	0.0947077	9.78152	97.1526	7.20823	10.3322	11.8041	70.0401	155.203	66.215	7	12	11	54	156	84	middle
csn-miR3630-3p_L-2_1ss22CT	TGGGAATCTCTCTGATGCAT	5.53829	2.46944	0.102476	1.60376	8.88209	3.08924	1.72204	0	14.2674	6.46677	5.91206	3	2	0	11	6.5	7.5	middle
csn-miR167d-p3_1ss10AG	CATGCTCTGGCAGCCTCACTCCT	2.54974	1.35035	0.103265	37.3379	95.2019	41.7048	43.4814	26.8275	60.9608	91.0323	133.612	40.5	50.5	25	47	91.5	169.5	middle
csn-miR2118e-p5_2ss8GC17GT	TCCCAATCCCTCCCATTCCT	1.82378	0.866934	0.105635	12.2485	22.3386	12.357	9.90171	14.4869	18.1585	18.9029	29.9544	12	11.5	13.5	14	19	38	middle
csn-miR172e-p5_2ss15CG19TA	ATTGGAACGATACAGAGAA	3.82361	1.93493	0.105787	0.514874	1.96867	1.54462	0	0	1.94556	1.98978	1.97069	1.5	0	0	1.5	2	2.5	low
csn-miR172e-p3_2ss15CG19TA	ATTGGAACGATACAGAGAA	3.82361	1.93493	0.105787	0.514874	1.96867	1.54462	0	0	1.94556	1.98978	1.97069	1.5	0	0	1.5	2	2.5	low
csn-miR166i-5p_R+1_1ss20GA	GGAATGTCGTCTGGTTCGAAA	1.65844	0.729831	0.107894	7.15934	11.8734	10.2975	6.88815	4.2924	9.07927	13.9284	12.6124	10	8	4	7	14	16	middle
csn-miR1515_2ss16AG19AG	TCATTTTTGCGTGCAGTGGTCC	2.09688	1.06824	0.10931	674.4	1414.14	1053.95	519.625	449.629	1328.17	964.047	1950.19	1023.5	603.5	419	1024	969	2474	high
csn-miR477a_L+1_1ss15GA	ACTCTCCCTCAAGGACTTCTG	3.00082	1.58535	0.111504	25.6397	76.94	14.4165	16.3593	46.1433	46.0449	115.407	69.3681	14	19	43	35.5	116	88	middle
csn-miR169q_R-2	TAGCCAAGGACGACTTGCC	21.9213	4.45426	0.115612	0.861018	18.8747	0	2.58306	0	10.3763	13.9284	32.3192	0	3	0	8	14	41	middle
csn-miR168c-3p_L-1	CCGCCTTGCATCAACTGAAT	1.80694	0.853545	0.119536	5.67096	10.2471	6.69336	6.02713	4.2924	10.3763	6.96422	13.4007	6.5	7	4	8	7	17	middle
csn-miR5225a-p5_2ss7GA19CT	TCGCAGAAGAGATGACACTT	inf	inf	0.120091	0	8.0964	0	0	0	12.9704	8.954	2.36482	0	0	0	10	9	3	middle
csn-miR7733-p3_2ss12CT17CA	TACCATTTTTCTGATGACG	2.33395	1.22277	0.125917	2.46055	5.7428	3.08924	0	4.2924	4.53964	7.95911	4.72964	3	0	4	3.5	8	6	low
csn-miR7733-p5_2ss12CT17CA	TACCATTTTTCTGATGACG	2.33395	1.22277	0.125917	2.46055	5.7428	3.08924	0	4.2924	4.53964	7.95911	4.72964	3	0	4	3.5	8	6	low
csn-miR169x_R+1_2ss11TC21AC	TAGCCAAGGACGACTTGCCTCG	6.75139	2.75518	0.127801	232.958	1572.79	204.92	329.77	164.184	1027.26	1049.61	2641.51	199	383	153	792	1055	3351	high
csn-miR398a_R+1_1ss19CA	TGTGTTCTCAGGTCGCCCATGT	10.8868	3.44451	0.132415	5.99843	65.3038	6.17848	4.30509	7.5117	66.149	23.2141	106.548	6	5	7	51	23.3333	135.167	middle
csn-miR530a_R+1_1ss20TG	TGCATTTGCACCTGCACCTGA	2.73899	1.45364	0.139913	47.0306	128.816	43.2494	64.5764	33.2661	142.674	61.6831	182.091	42	75	31	110	62	231	middle
csn-miR5175-p5_1ss4CT	TCCTTCTGTTCCAAATTACTC	2.91336	1.54268	0.144456	1.79062	5.2167	0	2.15255	3.2193	3.89112	3.48211	8.27688	0	2.5	3	3	3.5	10.5	low
csn-miR8757b-p5_1ss17GC	TTTTGGGTTGGGTCGACC	1.64604	0.718996	0.145131	4.34698	7.15529	4.11899	5.16611	3.75585	7.78224	8.954	4.72964	4	6	3.5	6	9	6	low
csn-miR3630-3p_L-1_1ss22CT	TTGGGAATCTCTCTGATGCAT	3.12993	1.64613	0.150856	9.31765	29.1636	16.9908	5.59662	5.3655	42.1538	11.4412	33.8958	16.5	6.5	5	32.5	11.5	43	middle
csn-miR168_L-1	CGCTTGGTGCAGGTCGGGAA	1.43768	0.52374	0.155418	160.84	231.236	125.114	130.444	226.961	265.893	213.404	214.411	121.5	151.5	211.5	205	214.5	272	middle
csn-miR156f_1ss12TA	TTGACAGAAGAAAGAGAGCAC	2.47005	1.30454	0.15679	15.3387	37.8873	9.26772	16.3593	20.3889	46.6934	16.9131	50.0554	9	19	19	36	17	63.5	middle
csn-miR156h_L+1	TTGACAGAAGAAAGAGAGCAC	2.47005	1.30454	0.15679	15.3387	37.8873	9.26772	16.3593	20.3889	46.6934	16.9131	50.0554	9	19	19	36	17	63.5	middle
csn-miR6424-p3_2ss15GA21CT	TGGTGCCACGCTGTATGCGTT	8.69928	3.1209	0.156875	13.6684	118.906	6.17848	19.8034	15.0234	80.4164	62.678	213.622	6	23	14	62	63	271	middle
csn-miR160c-p5_2ss13AG17AG	AGCCATGCATGTGTAAGT	3.88574	1.95819	0.172223	1.373	5.3351	4.11899	0	0	9.07927	2.98467	3.94137	4	0	0	7	3	5	low
csn-miR169d-p3_1ss9CA	AAGTTGTCATTGGCTACATT	inf	inf	0.177879	0	3.03243	0	0	0	1.94556	5.96933	1.18241	0	0	0	1.5	6	1.5	low
csn-miR408_L-1R+1	TGCACTGCCTCTTCCCTGGCT	8.39953	3.07031	0.179157	329.532	2767.91	323.855	348.712	316.028	2436.49	875.502	4991.75	314.5	405	294.5	1878.5	880	6332.5	high
csn-miR5083-p5_1ss19CA	CTACAATTATCTGATCAAA	inf	inf	0.18389	0	1.78435	0	0	0	2.59408	0	2.75896	0	0	0	2	0	3.5	low
csn-miR8757b-p5_2ss18GC20TG	ATTTTGGGTTGGGTCGACCG	1.72524	0.786796	0.184382	9.32644	16.0903	11.3272	6.45764	10.1945	21.4011	17.4105	9.45929	11	7.5	9.5	16.5	17.5	12	middle
csn-miR472a	TTTTCCCTACTCCACCCATCCC	inf	inf	0.186515	0	2.90307	0	0	0	0	3.97955	4.72964	0	0	0	0	4	6	low
csn-miR156d-p5	ACAGAAGAGAGTGAGCACACT	inf	inf	0.187339	0	1.91573	0	0	0	2.59408	0	3.1531	0	0	0	2	0	4	low
csn-miR397-p3_2ss7AC17CT	TTCATCCGCGCTGCACTCAAT	inf	inf	0.188075	0	22.6783	0	0	0	10.3763	11.9387	45.7199	0	0	0	8	12	58	middle
csn-miR160b-p5_2ss12CT17CG	AGCCATGCATGTCTAAGTA	inf	inf	0.18893	0	1.18878	0	0	0	0	1.98978	1.57655	0	0	0	0	2	2	low
csn-miR397a	TCATTGAGTGCAGCGTTGATG	inf	inf	0.194086	0	3.13775	0	0	0	0	5.47189	3.94137	0	0	0	0	5.5	5	low
csn-miR397a_1ss2CA	TAATTGAGTGCAGCGTTGATG	3.08933	1.62729	0.197198	5.40996	16.7131	7.20823	2.58306	6.4386	28.5349	12.9335	8.67102	7	3	6	22	13	11	middle
csn-miR535b-p3_1ss16TC	CGTGCTGTCTATCGTCGTCAT	2.05076	1.03616	0.198207	13.8512	28.4055	5.14874	9.04069	27.3641	18.8071	40.7904	25.6189	5	10.5	25.5	14.5	41	32.5	middle
csn-miR5267j-p3_2ss2AT17AG	CTAGTGAATAACTAAAGAA	1.64375	0.71699	0.202513	2.54781	4.18796	2.05949	1.29153	4.2924	4.53964	4.477	3.54723	2	1.5	4	3.5	4.5	4.5	low
csn-miR397-p3	TTGAGTGCAGCGTTGATGATA	inf	inf	0.203623	0	3.85716	0	0	0	0	4.477	7.09447	0	0	0	0	4.5	9	low
csn-miR397-p5	TTGAGTGCAGCGTTGATGATA	inf	inf	0.203623	0	3.85716	0	0	0	0	4.477	7.09447	0	0	0	0	4.5	9	low
csn-miR477g-p5	CTCAAAGGCTTCCAATATT	inf	inf	0.208729	0	2.11479	0	0	0	0	3.97955	2.36482	0	0	0	0	4	3	low
csn-miR6300-p3_1ss10AG	TATAGTGGTGAGTATTCCC	inf	inf	0.214378	0	1.80922	0	0	0	1.94556	3.48211	0	0	0	0	1.5	3.5	0	low
csn-miR398a	TGTGTTCTCAGGTCACCCCTT	201.464	7.65438	0.21444	13.8556	2791.4	27.8032	9.4712	4.2924	904.036	1611.72	5858.45	27	11	4	697	1620	7432	high
csn-miR169e_R-1_1ss21GT	TAGCCAAGGATGACTTGCCTT	1.75779	0.813765	0.218338	5.26714	9.25854	2.57437	9.4712	3.75585	10.3763	5.96933	11.43	2.5	11	3.5	8	6	14.5	middle
csn-miR7771-p5_2ss9GA18TA	CAAGGGTTATAAGCCCTA	2.29087	1.1959	0.218998	7.4539	17.0759	4.11899	0	18.2427	15.5645	19.8978	15.7655	4	0	17	12	20	20	middle
csn-miR1446_R-1_1ss19GT	TGAACTCTCTCCCTCAATTGC	3.485	1.80116	0.220531	1.11701	3.89277	2.05949	1.29153	0	2.59408	1.98978	7.09447	2	1.5	0	2	2	9	low
csn-miR169e_R-2_1ss13AG	TAGCCAAGGATGGCTTGCCT	1.52291	0.606829	0.229618	105.991	161.415	53.5468	150.678	113.749	215.309	137.295	131.642	52	175	106	166	138	167	middle
csn-miR166b-p3_2ss6CG17TA	TTATTGGATCTTTTGAAT	2.76197	1.4657	0.233365	0.89425	2.46989	0	0	2.68275	3.2426	2.98467	1.18241	0	0	2.5	2.5	3	1.5	low
csn-miR535a-p3_1ss14CT	GTGCTCTCTCTCGTTGTCATA	1.47646	0.562145	0.233913	173.34	255.929	110.698	159.288	250.032	172.506	311.898	283.385	107.5	185	233	133	313.5	359.5	middle
csn-miR3630-3p_L-2_1ss14CT	TGGGAATCTCTTTGATGCAC	6.02734	2.59152	0.234262	0.514874	3.10332	1.54462	0	0	0	4.97444	4.33551	1.5	0	0	0	5	5.5	low
csn-miR482a-3p_2ss18TC21TA	TTTCCAATTCCACCCATCCCAA	inf	inf	0.24394	0	1.67986	0	0	0	0	1.49233	3.54723	0	0	0	0	1.5	4.5	low
csn-miR168_L-3R-2	CAGTTGATGCAAGGCGGGA	inf	inf	0.24394	0	3.35971	0	0	0	0	2.98467	7.09447	0	0	0	0	3	9	low
csn-miR482-p3_2ss9TG21AG	TTCCCTACGCCACCCATTCCGT	1.45356	0.539595	0.244489	1954.99	2841.7	2278.83	2052.67	1533.46	2310.03	2271.33	3943.74	2213	2384	1429	1781	2283	5003	high
csn-miR1446_R-1_2ss5CT20GC	TGAATTCTCTCCCTCAATGCC	1.80298	0.850383	0.244544	15.7135	28.3311	13.3867	19.8034	13.9503	15.5645	26.862	42.5668	13	23	13	12	27	54	middle
csn-miR3630-3p_L-3_1ss22CA	GGGAATCTCTCTGATGCAA	3.97894	1.99239	0.247764	0.858123	3.41442	2.57437	0	0	2.59408	6.46677	1.18241	2.5	0	0	2	6.5	1.5	low
csn-miR156a_R+1	TGACAGAAGAGAGTGAGCACA	1.28487	0.361628	0.253123	364.799	468.721	235.297	428.787	430.313	467.583	404.92	533.662	228.5	498	401	360.5	407	677	middle
csn-miR156b-5p_R+1	TGACAGAAGAGAGTGAGCACA	1.28487	0.361628	0.253123	364.799	468.721	235.297	428.787	430.313	467.583	404.92	533.662	228.5	498	401	360.5	407	677	middle
csn-miR159a-p3_2ss9AT18TG	CCCTCCTTTTGATCCTTGT	inf	inf	0.254783	0	6.18493	0	0	0	0	13.431	5.12378	0	0	0	0	13.5	6.5	middle
csn-miR169k_R-1_2ss18CT20GC	GAGCCAAGGATGAATTGTCC	2.66379	1.41348	0.268915	3.67927	9.80078	3.08924	2.58306	5.3655	5.18816	17.908	6.30619	3	3	5	4	18	8	middle
csn-miR828a	TCTTGCTCAAATGAGTATTCCA	1.3553	0.438613	0.270526	88.4033	119.813	123.57	69.7425	71.8977	85.6046	134.31	139.525	120	81	67	66	135	177	middle
csn-miR477g-p5_1ss1CT	TCCTCAAAGGCTTCCAATATT	1.49613	0.58124	0.273084	68.8961	103.078	71.5674	78.7832	56.3378	60.9608	140.279	107.994	69.5	91.5	52.5	47	141	137	middle
csn-miR5368-p5_1ss4TC	GTTCCCTGGGATTGGCTTTG	5.76528	2.52739	0.273864	0.89425	5.1556	0	0	2.68275	0	9.94888	5.51792	0	0	2.5	0	10	7	low
csn-miR5303j-p5_2ss10GT17CT	ATTCAAATTTCTGCCCTA	3.00188	1.58586	0.289811	1.25195	3.7582	0	0	3.75585	1.94556	6.96422	2.36482	0	0	3.5	1.5	7	3	low
csn-miR1427-p3_2ss16GA18AC	CGGCGCCGGCCTGCGAGC	inf	inf	0.294362	0	2.51529	0	0	0	0	5.96933	1.57655	0	0	0	0	6	2	low
csn-miR1427-p5_2ss16GA18AC	CGGCGCCGGCCTGCGAGC	inf	inf	0.294362	0	2.51529	0	0	0	0	5.96933	1.57655	0	0	0	0	6	2	low
csn-miR398a-3p_1ss20CG	TGTGTTCTCAGGTCGCCCCGG	97.9563	6.61407	0.303445	0.287006	28.114	0	0.861018	0	68.0946	2.32141	13.9262	0	1	0	52.5	2.33333	17.6667	middle
csn-miR159a-5p_L-1R-1	AGCTCCTTGAAGTCCAATT	4.60713	2.20387	0.308856	0.430509	1.98341	0	1.29153	0	0	3.97955	1.97069	0	1.5	0	0	4	2.5	low
csn-miR8757b-p5_2ss1TG19GC	GATTTTGGGTTGGGTCGACC	1.792	0.841572	0.320263	6.35613	11.3902	6.17848	4.30509	8.5848	18.8071	9.45144	5.91206	6	5	8	14.5	9.5	7.5	middle
csn-miR477g-p5_2ss1CT22CT	TCCTCAAAGGCTTCCAATATTT	1.5306	0.614101	0.333634	4.30952	6.59617	4.11899	3.44407	5.3655	3.2426	9.45144	7.09447	4	4	5	2.5	9.5	9	low
csn-miR169x	TAGCCAAGGATGACTTGCCTA	1.42628	0.512259	0.344565	8.67528	12.3734	9.26772	6.02713	10.731	7.78224	17.908	11.43	9	7	10	6	18	14.5	middle
csn-miR319g_L+1R-2	ATTGGACTGAAGGGAGCTCC	1.78013	0.831985	0.345674	3.43984	6.12338	0	6.02713	4.2924	9.07927	2.98467	6.30619	0	7	4	7	3	8	low
csn-miR477a-5p_R+1_3ss1CA20TC21CA	ACTCTCCCTCAAGGGCTTCCAC	1.5901	0.669114	0.348775	10.8386	17.2344	13.3867	9.4712	9.6579	7.78224	17.908	26.013	13	11	9	6	18	33	middle
csn-miR3630-3p_L-1_1ss14CT	TTGGGAATCTCTTTGATGCAC	1.7444	0.802733	0.351717	11.0267	19.2349	22.6544	5.59662	4.82895	11.0248	17.908	28.772	22	6.5	4.5	8.5	18	36.5	middle
csn-miR319b-p3_2ss6AT21CA	ATCCATCGATGCAGGAGCTGA	28.7194	4.84395	0.357661	0.686498	19.7158	2.05949	0	0	5.83668	51.7342	1.57655	2	0	0	4.5	52	2	middle
csn-miR4995_L+1R-4	TAGGCAGTGGCTTGGTTA	1.53292	0.616282	0.360464	10.7593	16.4931	9.26772	15.4983	7.5117	12.9704	25.8671	10.6417	9	18	7	10	26	13.5	middle
csn-miR169g-p3_2ss12CT18GC	TTTGCTCCGGGTTTATCCA	2.84773	1.50981	0.362558	0.53655	1.52795	0	0	1.60965	2.59408	1.98978	0	0	0	1.5	2	2	0	low
csn-miR858-p5_1ss4TG	CTAGGCTTGTCAAGTGAGCAG	1.29992	0.378423	0.363422	22.6744	29.4749	25.2288	28.8441	13.9503	38.2627	21.3901	28.772	24.5	33.5	13	29.5	21.5	36.5	middle
csn-miR164a-p3_2ss15CG18CG	TCATCATCTTCTTCGTCGTCC	1.21121	0.276445	0.369509	8.91249	10.7949	10.2975	7.31866	9.12135	11.0248	7.95911	13.4007	10	8.5	8.5	8.5	8	17	middle
csn-miR164a-p5_2ss15CG18CG	TCATCATCTTCTTCGTCGTCC	1.21121	0.276445	0.369509	8.91249	10.7949	10.2975	7.31866	9.12135	11.0248	7.95911	13.4007	10	8.5	8.5	8.5	8	17	middle
csn-miR8757b-p3_1ss18GC	ATTTTGGGTTGGGTCGACC	2.37488	1.24786	0.374745	2.29826	5.45811	2.05949	2.15255	2.68275	11.0248	2.98467	2.36482	2	2.5	2.5	8.5	3	3	middle
csn-miR159b_R-1	ATTGGAGTGAAGGGAGCTCC	2.57415	1.3641	0.398321	0.574012	1.47759	0	1.72204	0	1.94556	2.48722	0	0	2	0	1.5	2.5	0	low
csn-miR6478_R-1	CCGACCTTAGCTCAGTTGGT	1.27667	0.352389	0.417745	3.83934	4.90157	2.05949	5.16611	4.2924	5.18816	5.96933	3.54723	2	6	4	4	6	4.5	low
csn-miR156c-p3_1ss5AG	CTATGCCATTGCTTTTGCG	inf	inf	0.42265	0	0.994888	0	0	0	0	2.98467	0	0	0	0	0	3	0	low
csn-miR169h-3p_L+1R+1_2ss3GA20CG	AGACAGTCACCTTGGCTAGGC	inf	inf	0.42265	0	1.32652	0	0	0	0	3.97955	0	0	0	0	0	4	0	low
csn-miR169x-p3_2ss6AT19AG	AGGCATTCATCTTGGCTAG	inf	inf	0.42265	0	2.65304	0	0	0	0	7.95911	0	0	0	0	0	8	0	low
csn-miR395c-p5_1ss8CG	GTTCCCCGGAACACTTCATT	inf	inf	0.42265	0	1.32652	0	0	0	0	3.97955	0	0	0	0	0	4	0	low
csn-miR858-p3_2ss15CG18TA	GTTATCGTTTATTTGATA	inf	inf	0.42265	0	0.64852	0	0	0	1.94556	0	0	0	0	0	1.5	0	0	low
csn-miR2111a-5p_R-1_1ss20TC	TAATCTGCATCCTGAGGTTC	inf	inf	0.42265	0	0.663259	0	0	0	0	1.98978	0	0	0	0	0	2	0	low
csn-miR5368_L-2R+1	ACAGTCTCAGGTAGACAG	inf	inf	0.42265	0	0.663259	0	0	0	0	1.98978	0	0	0	0	0	2	0	low
csn-miR8175-p3_2ss13TC17AC	TGGTAAGTATTCCCGCCTGTC	inf	inf	0.42265	0	0.64852	0	0	0	1.94556	0	0	0	0	0	1.5	0	0	low
csn-miR166a-5p_2ss13GT19AC	GGAATGTTGTCTTGCTCGCGG	inf	inf	0.42265	0	0.64852	0	0	0	1.94556	0	0	0	0	0	1.5	0	0	low
csn-miR4376_R-3_1ss18CT	ACGCAGGAGAGATGATGTT	inf	inf	0.42265	0	0.994888	0	0	0	0	2.98467	0	0	0	0	0	3	0	low
csn-miR6300_1ss1GT	TTCGTTGTAGTATAGTGG	inf	inf	0.42265	0	3.02642	0	0	0	9.07927	0	0	0	0	0	7	0	0	low
csn-miR477a_L+1_2ss2AT22AC	ATTCTCCCTCAAAGGCTTCCAC	1.60581	0.683305	0.423612	10.1023	16.2224	12.357	9.90171	8.04825	4.53964	18.9029	25.2248	12	11.5	7.5	3.5	19	32	middle
csn-miR396e-p5_2ss2TG17GC	CGCTTGATCTCCCGTCCATCT	2.5387	1.34409	0.426814	0.53655	1.36214	0	0	1.60965	2.59408	1.49233	0	0	0	1.5	2	1.5	0	low
csn-miR396e-p3_2ss2TG17GC	CGCTTGATCTCCCGTCCATCT	2.5387	1.34409	0.426814	0.53655	1.36214	0	0	1.60965	2.59408	1.49233	0	0	0	1.5	2	1.5	0	low
csn-miR5368-p5_1ss15CA	GATACCACTCTGGAAGAGCTA	1.4971	0.582172	0.428024	25.8217	38.6577	22.6544	27.9831	26.8275	25.2923	64.6677	26.013	22	32.5	25	19.5	65	33	middle
csn-miR159-p5_1ss10GT	AGCTGCTGATCTATGGATCCC	1.13982	0.18881	0.430334	577.347	658.073	449.485	650.499	632.056	525.949	720.299	727.971	436.5	755.5	589	405.5	724	923.5	middle
csn-miR6173-p3_1ss4CT	CAGTGCTGTAGCTAACGCG	1.76597	0.820457	0.431072	1.60376	2.83218	3.08924	1.72204	0	1.94556	4.97444	1.57655	3	2	0	1.5	5	2	low
csn-miR6294-p5_2ss14AG17GC	AAGATGCACCAATGCTCCTAG	1.56977	0.650551	0.438613	1.5194	2.3851	1.54462	3.01356	0	2.59408	2.98467	1.57655	1.5	3.5	0	2	3	2	low
csn-miR6294-p3_2ss14AG17GC	AAGATGCACCAATGCTCCTAG	1.56977	0.650551	0.438613	1.5194	2.3851	1.54462	3.01356	0	2.59408	2.98467	1.57655	1.5	3.5	0	2	3	2	low
csn-miR167f-3p_2ss12CT15TC	AGATCATGTGGTAGCTTCACC	1.37763	0.462185	0.445333	18.8072	25.9093	14.9313	23.2475	18.2427	18.8071	40.7904	18.1303	14.5	27	17	14.5	41	23	middle
csn-miR167b-p3	AGATCATGTGGTAGCTTCACC	1.37763	0.462185	0.445333	18.8072	25.9093	14.9313	23.2475	18.2427	18.8071	40.7904	18.1303	14.5	27	17	14.5	41	23	middle
csn-miR472-p3_2ss6TG18AG	TTTCCGACTCCGCCCATGCCAT	1.2219	0.289125	0.451228	4297.99	5251.71	5299.08	4774.78	2820.11	4798.4	4046.71	6910.01	5146	5545.5	2628	3699.5	4067.5	8766	high
csn-miR2592ay-p3_2ss6AG17CG_2	GAGTCGGGTTGTTTGGGAA	1.55314	0.635184	0.451713	4.25839	6.61385	2.57437	2.15255	8.04825	7.13372	9.94888	2.75896	2.5	2.5	7.5	5.5	10	3.5	low
csn-miR2592ay-p5_2ss6AG17CG_1	GAGTCGGGTTGTTTGGGA	1.55314	0.635184	0.451713	4.25839	6.61385	2.57437	2.15255	8.04825	7.13372	9.94888	2.75896	2.5	2.5	7.5	5.5	10	3.5	low
csn-miR2592ay-p3_2ss6AG17CG_1	GAGTCGGGTTGTTTGGGA	1.55314	0.635184	0.451713	4.25839	6.61385	2.57437	2.15255	8.04825	7.13372	9.94888	2.75896	2.5	2.5	7.5	5.5	10	3.5	low
csn-miR2592ay-p5_2ss6AG17CG_2	GAGTCGGGTTGTTTGGGAA	1.55314	0.635184	0.451713	4.25839	6.61385	2.57437	2.15255	8.04825	7.13372	9.94888	2.75896	2.5	2.5	7.5	5.5	10	3.5	low
csn-miR2111-5p_2ss19CT21AG	TAATCTGCATCCTGAGGTTTG	1.42236	0.508288	0.456938	101.998	145.078	59.7253	106.766	139.503	105.06	234.794	95.3812	58	124	130	81	236	121	middle
csn-miR6173-p3_1ss18AG	ATACCCCAGTAGTCCTAG	2.70872	1.43761	0.461601	0.574012	1.55484	0	1.72204	0	0	3.48211	1.18241	0	2	0	0	3.5	1.5	low
csn-miR168c-3p	CCCGCCTTGCATCAACTGAAT	1.11626	0.158674	0.462865	142.303	158.847	167.849	113.654	145.405	179.64	135.305	161.596	163	132	135.5	138.5	136	205	middle
csn-miR160d-3p	GCGTGCGAGGAGCCAAGCATG	2.35008	1.23271	0.481414	1.43503	3.37244	0	4.30509	0	0	6.96422	3.1531	0	5	0	0	7	4	low
csn-miR5368-p3	CAGTCTCAGGTAGACAGT	2.1358	1.09478	0.486828	0.53655	1.14596	0	0	1.60965	1.94556	1.49233	0	0	0	1.5	1.5	1.5	0	low
csn-miR6300_R+1	GTCGTTGTAGTATAGTGGT	1.38304	0.467841	0.495436	49.7136	68.7558	47.3684	50.8001	50.9723	108.951	68.1499	29.1661	46	59	47.5	84	68.5	37	middle
csn-miR535a_R-3	TGACAACGAGAGAGAGCA	1.30853	0.387949	0.502125	50.5102	66.0943	28.8329	50.8001	71.8977	99.872	48.7495	49.6613	28	59	67	77	49	63	middle
csn-miR156a-p3_1ss10TA	GCTCTTTATACTTCTGTCATC	2.07099	1.05032	0.502481	0.861018	1.78316	0	2.58306	0	0	2.98467	2.36482	0	3	0	0	3	3	low
csn-miR162a-5p_R-1_1ss5GC	TGGACGCAGCGGTTCATCGAT	1.12528	0.170281	0.512758	48.2662	54.3129	36.556	61.5628	46.6799	55.7727	47.2572	59.9088	35.5	71.5	43.5	43	47.5	76	middle
csn-miR156d-p5_2ss2AG21AT	CGATTCCTCTATCTTTCTTTT	1.49511	0.580255	0.515468	1.54107	2.30408	0	3.01356	1.60965	3.2426	2.48722	1.18241	0	3.5	1.5	2.5	2.5	1.5	low
csn-miR858b_R-3	TTCGTTGTCTGTTCGACC	1.14523	0.195639	0.518429	190.956	218.689	260.526	169.621	142.722	216.606	225.84	213.622	253	197	133	167	227	271	middle
csn-miR169c-3p_L+2R+1_1ss19CA	AGGCAGTCTCCTTGGCTAACC	1.1546	0.207396	0.520931	36.8695	42.5696	26.7734	45.2035	38.6316	30.4804	48.7495	48.4789	26	52.5	36	23.5	49	61.5	middle
csn-miR168_1ss5TC	TCGCCTGGTGCAGGTCGGGAA	1.33045	0.411919	0.560434	447.219	595.005	340.846	304.37	696.442	979.913	418.848	386.254	331	353.5	649	755.5	421	490	middle
csn-miR164b-p5_2ss6CG21CT	CACACGTCTCTCTCTCTCTAT	1.84534	0.883884	0.568278	0.7154	1.32015	0	0	2.1462	0	1.98978	1.97069	0	0	2	0	2	2.5	low
csn-miR164b-p3_2ss6CG21CT	CACACGTCTCTCTCTCTCTAT	1.84534	0.883884	0.568278	0.7154	1.32015	0	0	2.1462	0	1.98978	1.97069	0	0	2	0	2	2.5	low
csn-miR159c_R-1_1ss19CT	TTTGGATTGAAGGGAGCTTT	1.25359	0.326068	0.589232	2.2348	2.80152	1.54462	3.01356	2.1462	3.2426	3.97955	1.18241	1.5	3.5	2	2.5	4	1.5	low
csn-miR169f_R-1_1ss20GA	CAGCCAAGGATGACTTGCCA	1.8739	0.906043	0.59483	3.86824	7.24868	0	5.16611	6.4386	0	17.4105	4.33551	0	6	6	0	17.5	5.5	middle
csn-miR156f-p3	TGCTCACTTCTCTTCTGTCAGC	1.1038	0.142482	0.595783	3393.9	3746.19	2892.04	4504.42	2785.23	3909.28	3453.76	3875.55	2808.5	5231.5	2595.5	3014	3471.5	4916.5	high
csn-miR396b_R+1_1ss7AT	TTCCACTGCTTTCTTGAACTT	1.89117	0.919277	0.615431	0.89425	1.69118	0	0	2.68275	3.89112	0	1.18241	0	0	2.5	3	0	1.5	low
csn-miR6173-p3_1ss2CT	GTGCTGTAGCTAACGCGTTA	1.19685	0.259247	0.621629	24.2252	28.9941	21.1098	19.3729	32.193	19.4556	44.2725	23.2541	20.5	22.5	30	15	44.5	29.5	middle
csn-miR168c-3p_L+3	GATCCCGCCTTGCATCAACTGAAT	1.44785	0.533914	0.630544	5.07316	7.34518	8.23798	2.15255	4.82895	12.9704	0	9.06515	8	2.5	4.5	10	0	11.5	middle
csn-miR5368-p5_1ss15AG	CTTAGGTGGAGGGCGAAGA	1.60185	0.679739	0.666952	0.7154	1.14596	0	0	2.1462	1.94556	1.49233	0	0	0	2	1.5	1.5	0	low
csn-miR828a-p3_2ss18AG22CT	AATGAGTATTCCAAACAGCAGT	1.40169	0.48717	0.689953	1.83452	2.57144	2.05949	3.44407	0	0	2.98467	4.72964	2	4	0	0	3	6	low
csn-miR169c-p3_2ss12GC17TG	TAAAAGTTACTCTAGGGA	1.16259	0.217342	0.694209	4.78983	5.56861	3.08924	4.30509	6.97515	6.4852	7.46166	2.75896	3	5	6.5	5	7.5	3.5	low
csn-miR528-5p	TGGAAGGGGCATGCAGAGGAG	1.9323	0.950317	0.697195	1.02975	1.98978	3.08924	0	0	0	5.96933	0	3	0	0	0	6	0	low
csn-miR472-p3_2ss6TG18AT	TTTCCGACTCCGCCCATTCCAT	1.1216	0.165559	0.722869	243.492	273.101	303.775	267.346	159.355	237.358	185.049	396.896	295	310.5	148.5	183	186	503.5	middle
csn-miR171h-p5_2ss8GC21TC	AGGTATTCACGTGTCTCAATC	1.52586	0.609619	0.789627	0.861018	1.31379	0	2.58306	0	0	0	3.94137	0	3	0	0	0	5	low
csn-miR535b-p3_2ss15TC21AG	GTGCTGTCTATCGTCGTCATG	1.14886	0.200206	0.831377	7.73869	8.89069	2.05949	5.59662	15.56	5.83668	14.9233	5.91206	2	6.5	14.5	4.5	15	7.5	middle
csn-miR159b-p5_2ss11CA18TG	TGGGTCCAAAAAGAGGGG	1.17598	0.233869	0.833365	2.27447	2.67474	3.60411	0	3.2193	0	4.477	3.54723	3.5	0	3	0	4.5	4.5	low
csn-miR159c-p3_2ss11CA18TG	TGGGTCCAAAAAGAGGGG	1.17598	0.233869	0.833365	2.27447	2.67474	3.60411	0	3.2193	0	4.477	3.54723	3.5	0	3	0	4.5	4.5	low
csn-miR398-p3_2ss5GA18AG	GGGGACGGACTGGGAACG	1.13831	0.186893	0.857989	9.80287	11.1587	11.3272	18.0814	0	19.4556	2.98467	11.0358	11	21	0	15	3	14	middle
csn-miR166g-p5	GTTGAGGGGAATGTTGTCTGG	1.20868	0.273437	0.90081	0.89425	1.08087	0	0	2.68275	3.2426	0	0	0	0	2.5	2.5	0	0	low
csn-miR482a-3p_L-2_2ss11TC14GT	TTCCCAATCCCTCCCATTCCTA	1.03051	0.0433625	0.923613	9637.35	9931.42	13264.2	9116.46	6531.42	8284.84	7391.03	14118.4	12881	10588	6086.5	6387.5	7429	17910.5	high
csn-miR5368-p5_1ss7TC	ACTGTTCCCTGGGATTGG	1.15548	0.208491	0.923951	0.430509	0.497444	0	1.29153	0	0	1.49233	0	0	1.5	0	0	1.5	0	low
csn-miR166g-5p_1ss1GA	AGAATGTTGTCTGGCTCGAGG	1.0925	0.127632	0.941995	1.7885	1.95393	0	0	5.3655	3.89112	0	1.97069	0	0	5	3	0	2.5	low
csn-miR169b-3p_2ss12C-15CT	GGCAAGTTGTCTTTGGCTACA	1.013	0.018639	0.957107	18.3933	18.6325	15.9611	17.2204	21.9986	18.8071	24.8722	12.2182	15.5	20	20.5	14.5	25	15.5	middle
csn-miR7972_1ss9CG	TTGTCAGGGTTGTTATTCTCC	1.06395	0.089433	0.957546	3.25087	3.45877	3.08924	3.44407	3.2193	10.3763	0	0	3	4	3	8	0	0	middle
csn-miR8757b-p5_2ss17GC19TG	TTTTGGGTTGGGTCGACCG	1.00163	0.00234664	0.996083	5.9912	6.00095	6.69336	4.30509	6.97515	7.78224	7.46166	2.75896	6.5	5	6.5	6	7.5	3.5	low
csn-miR396b	TTCCACAGCTTTCTTGAACT	0.195811	-2.35247	9.63013e-05	2604.94	510.076	2499.2	2555.07	2760.55	562.915	554.65	412.662	2427	2967.5	2572.5	434	557.5	523.5	high
csn-miR396a-p3_1ss17GA	CAAGAAAGCTGTGGGAAGACA	0.0887795	-3.49363	0.000127723	85.4729	7.58824	89.0731	89.5459	77.7998	11.0248	1.49233	10.2476	86.5	104	72.5	8.5	1.5	13	middle
csn-miR396a_2ss5AC21AT	TTCCCCAGCTTTCTTGAACTT	0.145432	-2.78158	0.000240268	1988.56	289.201	2047.65	1796.51	2121.52	435.157	254.691	177.756	1988.5	2086.5	1977	335.5	256	225.5	high
csn-miR396a-p3_1ss19GA	CTCAAGAAAGCTGTGGGAAG	0.073663	-3.76292	0.00146719	354.915	26.1441	345.48	388.75	330.515	32.426	29.8467	16.1596	335.5	451.5	308	25	30	20.5	middle
csn-miR172b-p3	TCTTGATGATGCTGCATCGGC	0.610709	-0.711443	0.00255481	125.891	76.883	129.233	115.376	133.064	71.9857	84.5655	74.0978	125.5	134	124	55.5	85	94	middle
csn-miR171a_1ss1TC	CGATTGAGCCGTGCCAATATC	0.0760299	-3.71729	0.00275346	271.793	20.6644	278.032	234.197	303.151	35.0201	17.908	9.06515	270	272	282.5	27	18	11.5	middle
csn-miR393a	TCCAAAGGGATCGCATTGATC	0.279004	-1.84164	0.00331319	462.229	128.964	414.473	468.394	503.821	143.971	116.402	126.518	402.5	544	469.5	111	117	160.5	middle
csn-miR396e-p3	TGGAAGCTCAAGAAAGCTGTG	0.0457613	-4.44973	0.00376339	10.8704	0.497444	8.75285	12.0543	11.8041	0	1.49233	0	8.5	14	11	0	1.5	0	middle
csn-miR171c-p5_1	GGATATTGGTGCGGTTCAATA	0.0860885	-3.53803	0.00423794	28.3436	2.44006	26.2586	24.9695	33.8027	0	2.98467	4.33551	25.5	29	31.5	0	3	5.5	middle
csn-miR171c-p5_2	TATTGGTGCGGTTCAATAAGA	0.0860885	-3.53803	0.00423794	28.3436	2.44006	26.2586	24.9695	33.8027	0	2.98467	4.33551	25.5	29	31.5	0	3	5.5	middle
csn-miR166a_R+2_1	TCGGACCAGGCTTCATTCCCC	0.464871	-1.1051	0.00431103	302995	140853	273301	297710	337973	118907	122304	181348	265406	345764	314950	91676	122932	230058	high
csn-miR166a-3p	TCGGACCAGGCTTCATTCCCC	0.464871	-1.1051	0.00431103	302995	140853	273301	297710	337973	118907	122304	181348	265406	345764	314950	91676	122932	230058	high
csn-miR166a_R+2_3	TCGGACCAGGCTTCATTCCTC	0.462032	-1.11394	0.0044602	301343	139230	271509	295928	336593	117156	120377	180157	263666	343696	313664	90326	120996	228546	high
csn-miR166a_R+2_2	TCGGACCAGGCTTCATTCCCT	0.462032	-1.11394	0.0044602	301343	139230	271509	295928	336593	117156	120377	180157	263666	343696	313664	90326	120996	228546	high
csn-miR166g-5p_2ss5GA8GT	AATGAAGTCTGATCCAAGATC	0.414446	-1.27075	0.00481123	76.762	31.8137	66.9336	81.7967	81.5556	35.0201	32.8313	27.5896	65	95	76	27	33	35	middle
csn-miR172c	GGAATCTTGATGATGCTGCAG	0.579024	-0.788305	0.00506222	6.85944	3.97178	6.17848	6.88815	7.5117	3.89112	4.477	3.54723	6	8	7	3	4.5	4.5	low
csn-miR162a-3p	TCGATAAACCTCTGCATCCAG	0.506177	-0.982287	0.00649332	3706.17	1875.98	4045.88	3878.03	3194.62	2197.18	1826.62	1604.14	3929	4504	2977	1694	1836	2035	high
csn-miR159c_1ss19CA	TTTGGATTGAAGGGAGCTATA	0.198141	-2.3354	0.00882926	33.2688	6.59192	30.3775	36.1628	33.2661	13.6189	4.97444	1.18241	29.5	42	31	10.5	5	1.5	middle
csn-miR160a-p3	TATGAGGAGCCAAGCATATCC	0.40138	-1.31696	0.00889403	18.9039	7.58764	15.4462	19.8034	21.462	9.07927	8.954	4.72964	15	23	20	7	9	6	middle
csn-miR171a	TGATTGAGCCGTGCCAATATC	0.0977232	-3.35516	0.00912548	21903.8	2140.51	20604.2	25743.6	19363.6	2481.24	1828.11	2112.18	20009	29899	18044.5	1913	1837.5	2679.5	high
csn-miR171g	TGATTGAGCCGTGCCAATATC	0.0977232	-3.35516	0.00912548	21903.8	2140.51	20604.2	25743.6	19363.6	2481.24	1828.11	2112.18	20009	29899	18044.5	1913	1837.5	2679.5	high
csn-miR394b-3p_1ss15TC	AGGTGGGCATACTGCCAACT	0.0373277	-4.74361	0.0093272	10.5588	0.394137	12.8718	8.61018	10.1945	0	0	1.18241	12.5	10	9.5	0	0	1.5	middle
csn-miR396b_R+1_1	TTCCACAGCTTTCTTGAACTG	0.245964	-2.02348	0.00953289	121410	29862.6	142059	109578	112593	33890.3	30241.6	25455.7	137956	127266	104924	26129	30397	32293	high
csn-miR396b_R+1_2	TTCCACAGCTTTCTTGAACTT	0.245964	-2.02348	0.00953289	121410	29862.6	142059	109578	112593	33890.3	30241.6	25455.7	137956	127266	104924	26129	30397	32293	high
csn-miR160b-3p_1ss16TA	GCGTATGAGGAGCCAAGCATA	0.203117	-2.29962	0.0108638	7.26183	1.475	5.66361	8.61018	7.5117	3.2426	0	1.18241	5.5	10	7	2.5	0	1.5	low
csn-miR160a-3p	GCGTATGAGGAGCCAAGCATA	0.203117	-2.29962	0.0108638	7.26183	1.475	5.66361	8.61018	7.5117	3.2426	0	1.18241	5.5	10	7	2.5	0	1.5	low
csn-miR396b_R+1_1ss2TC_2	TCCCACAGCTTTCTTGAACTT	0.216266	-2.20912	0.0110178	38.4848	8.32296	43.2494	31.4272	40.7778	9.72779	6.96422	8.27688	42	36.5	38	7.5	7	10.5	middle
csn-miR396b_R+1_1ss2TC_1	TCCCACAGCTTTCTTGAACTG	0.216266	-2.20912	0.0110178	38.4848	8.32296	43.2494	31.4272	40.7778	9.72779	6.96422	8.27688	42	36.5	38	7.5	7	10.5	middle
csn-miR396b-3p_1ss21GA	GTTCAATAAAGCTGTGGGAAA	0.190559	-2.39169	0.0116466	69.0842	13.1646	80.8351	74.9086	51.5088	14.916	4.477	20.101	78.5	87	48	11.5	4.5	25.5	middle
csn-miR5368-p5_2ss15TC18CT	GATTGGCTTTGGGCCTTT	0.177103	-2.49734	0.0125755	5.03426	0.891581	3.60411	5.59662	5.90205	0	1.49233	1.18241	3.5	6.5	5.5	0	1.5	1.5	low
csn-miR394a_R-1_1ss21AT	TTGGCATTCTGTCCACCTCCT	0.0922124	-3.4389	0.0134304	27.9679	2.57898	22.6544	27.9831	33.2661	2.59408	1.98978	3.1531	22	32.5	31	2	2	4	middle
csn-miR396-p3_1ss1CT	TGCGGTTCAGTGAAGCTGTGG	0.271429	-1.88135	0.0135702	96.4262	26.1729	74.1418	102.461	112.676	15.5645	29.8467	33.1075	72	119	105	12	30	42	middle
csn-miR166a_L+1R+2	TTCGGACCAGGCTTCATTCCTC	0.123584	-3.01644	0.014436	50.4589	6.23589	53.5468	60.2713	37.5585	2.59408	5.47189	10.6417	52	70	35	2	5.5	13.5	middle
csn-miR171j-5p_2ss8CT9TC	TATTGGCTCGGTTCACTCAGA	0.0128897	-6.27764	0.0154168	260.651	3.35971	229.634	325.895	226.424	0	2.98467	7.09447	223	378.5	211	0	3	9	middle
csn-miR160a_L+1	CTGCCTGGCTCCCTGTATGCCA	0.480459	-1.05751	0.0157756	23.1887	11.1412	21.6247	27.5526	20.3889	9.07927	10.9438	13.4007	21	32	19	7	11	17	middle
csn-miR390-p3_2ss17TA19GA	CTATCCCTCCTGAGCTATATA	-inf	-inf	0.0163897	20.5263	0	17.5057	25.8306	18.2427	0	0	0	17	30	17	0	0	0	middle
csn-miR171e	TGATTGAGCCGCGCCAATATC	-inf	-inf	0.0170303	4.22438	0	5.14874	4.30509	3.2193	0	0	0	5	5	3	0	0	0	low
csn-miR821b-p3_2ss15TG21AT	TTTATTTTTGTTATGTCTTCT	0.0402143	-4.63615	0.0203252	16.4931	0.663259	11.3272	19.3729	18.7793	0	1.98978	0	11	22.5	17.5	0	2	0	middle
csn-miR821b-p5_2ss15TG21AT	TTTATTTTTGTTATGTCTTCT	0.0402143	-4.63615	0.0203252	16.4931	0.663259	11.3272	19.3729	18.7793	0	1.98978	0	11	22.5	17.5	0	2	0	middle
csn-miR403a	TTAGATTCACGCACAAACTCG	0.445204	-1.16746	0.0208425	133.238	59.3181	139.531	130.875	129.309	57.0697	39.2981	81.5864	135.5	152	120.5	44	39.5	103.5	middle
csn-miR166a_L+2R+2	CATCGGACCAGGCTTCATTCCCC	0.211648	-2.24026	0.0209069	45.8725	9.70882	60.2402	38.7458	38.6316	10.3763	2.98467	15.7655	58.5	45	36	8	3	20	middle
csn-miR169g-p3_1ss10CT	AGGCAGTCATCTTGGCTAATC	0.164476	-2.60405	0.0213199	10.0814	1.65815	11.3272	10.3322	8.5848	0	4.97444	0	11	12	8	0	5	0	middle
csn-miR390b-p3_1ss12CT	ATAGCGCTATCTATCCTGAGT	0.341945	-1.54816	0.0221991	34.3584	11.7487	41.1899	25.4	36.4854	16.213	11.9387	7.09447	40	29.5	34	12.5	12	9	middle
csn-miR171m	TTGAGCCGCGTCAATATCTCA	0.173948	-2.52327	0.0253159	92.7381	16.1316	64.8741	111.932	101.408	11.0248	12.9335	24.4365	63	130	94.5	8.5	13	31	middle
csn-miR8005a-p5_1ss11AG	AGGGTTTAGGGTTTAGGGTTT	-inf	-inf	0.0265481	6.57166	0	8.75285	5.59662	5.3655	0	0	0	8.5	6.5	5	0	0	0	low
csn-miR394a-5p_L+3	ATCTTGGCATTCTGTCCACCTCC	0.0632028	-3.98387	0.0265543	62.297	3.93735	57.6658	80.9357	48.2895	3.89112	3.97955	3.94137	56	94	45	3	4	5	middle
csn-miR393a-3p	ATCATGCTATCCCTTTGGATT	0.394912	-1.3404	0.0272008	85.8959	33.9213	64.8741	101.6	91.2135	19.4556	54.7189	27.5896	63	118	85	15	55	35	middle
csn-miR159c_1ss12GA	TTTGGATTGAAAGGAGCTCTA	0.34506	-1.53508	0.0273019	16.6648	5.75034	11.8421	19.3729	18.7793	7.13372	6.96422	3.1531	11.5	22.5	17.5	5.5	7	4	middle
csn-miR171e_L+2	CCTGATTGAGCCGTGCCAATATC	0.0691735	-3.85364	0.028778	15.1941	1.05103	19.5652	16.3593	9.6579	0	0	3.1531	19	19	9	0	0	4	middle
csn-miR171j-5p	TATTGGCCTGGTTCACTCAGA	0.0346836	-4.8496	0.0291624	308.058	10.6846	223.97	402.957	297.249	9.07927	11.9387	11.0358	217.5	468	277	7	12	14	middle
csn-miR162_R+1	TCGATAAACCTCTGCATCCAGT	0.424772	-1.23524	0.029739	37.9141	16.1048	43.7643	40.4679	29.5103	25.9408	10.9438	11.43	42.5	47	27.5	20	11	14.5	middle
csn-miR162a_R+1	TCGATAAACCTCTGCATCCAGT	0.424772	-1.23524	0.029739	37.9141	16.1048	43.7643	40.4679	29.5103	25.9408	10.9438	11.43	42.5	47	27.5	20	11	14.5	middle
csn-miR166i-p3	TCTCGGACCAGGCTTCATTCT	0.369979	-1.43449	0.0300537	25855.6	9566	20540.4	26152.1	30874.2	8839.32	9601.67	10257	19947	30373.5	28771	6815	9651	13012	high
csn-miR390a-3p_R+1_1ss8CT	CGCTATCTATCCTGAGTTTCA	0.308585	-1.69626	0.0304032	278.901	86.0648	354.233	256.583	225.888	83.659	105.956	68.5799	344	298	210.5	64.5	106.5	87	middle
csn-miR2916-p3	TAAACGATGCCGACCAGG	0.586806	-0.769045	0.0309585	749.382	439.742	867.047	662.123	718.977	443.587	561.117	314.521	842	769	670	342	564	399	middle
csn-miR390	AAGCTCAGGAGGGATAGCGCC	0.136559	-2.8724	0.0315816	1132.62	154.67	828.946	1466.31	1102.61	204.284	111.925	147.801	805	1703	1027.5	157.5	112.5	187.5	middle
csn-miR171m_1ss21AT	TTGAGCCGCGTCAATATCTCT	0.416017	-1.26529	0.031978	1345.49	559.748	1154.35	1636.8	1245.33	536.326	546.194	596.724	1121	1901	1160.5	413.5	549	757	middle
csn-miR6149a-p5_2ss18CT21TA	ATACGCACCTGAATCGGTAGA	0.368658	-1.43965	0.0320835	3962.6	1460.84	3384.78	5024.04	3478.99	1579.79	1687.33	1115.41	3287	5835	3242	1218	1696	1415	high
csn-miR394b_L-1_1ss5CA	TGGAATTCTGTCCACCTCC	0.169267	-2.56262	0.0321328	360.047	60.9442	250.229	392.624	437.288	73.2827	49.247	60.303	243	456	407.5	56.5	49.5	76.5	middle
csn-miR394b	TTGGCATTCTGTCCACCTCC	0.173464	-2.52729	0.0328713	17611	3054.88	12074.3	20191.7	20567	3605.77	2482.25	3076.63	11725.5	23451	19166	2780	2495	3903	high
csn-miR394a_R-2	TTGGCATTCTGTCCACCTCC	0.173464	-2.52729	0.0328713	17611	3054.88	12074.3	20191.7	20567	3605.77	2482.25	3076.63	11725.5	23451	19166	2780	2495	3903	high
csn-miR172d_L-2R+1	AGAATCTTGATGATGCTGCATT	0.635277	-0.654542	0.0332396	118.921	75.5479	136.441	114.085	106.237	80.4164	72.1294	74.0978	132.5	132.5	99	62	72.5	94	middle
csn-miR164a_L+1_2	CTGGAGAAGCAGGGCACGTGCA	0.446615	-1.1629	0.0346202	1603.4	716.102	1804.12	1168.4	1837.68	971.482	557.635	619.189	1752	1357	1712.5	749	560.5	785.5	high
csn-miR164a_L+1_1	ATGGAGAAGCAGGGCACGTGCA	0.446615	-1.1629	0.0346202	1603.4	716.102	1804.12	1168.4	1837.68	971.482	557.635	619.189	1752	1357	1712.5	749	560.5	785.5	high
csn-miR390_1ss5TC	AAGCCCAGGAGGGATAGCGCC	0.101003	-3.30753	0.0351757	74.0056	7.47477	55.6063	99.8781	66.5322	8.43076	10.4463	3.54723	54	116	62	6.5	10.5	4.5	middle
csn-miR159c	TTTGGATTGAAGGGAGCTCTA	0.548339	-0.866861	0.0352698	38582.8	21156.4	30861	40060.2	44827.1	23264.3	22625.3	17579.7	29969.5	46526.5	41773.5	17936.5	22741.5	22301.5	high
csn-miR171g	CGAGCCGAATCAATATCACTC	0.343017	-1.54365	0.0378882	74.0953	25.416	86.4988	49.9391	85.848	27.2378	34.8211	14.1889	84	58	80	21	35	18	middle
csn-miR821b-p5_2ss14TG20AT	TTATTTTTGTTATGTCTTCT	-inf	-inf	0.0422353	2.30549	0	1.54462	2.15255	3.2193	0	0	0	1.5	2.5	3	0	0	0	low
csn-miR159b_R+1_1ss21CT	TTTGGATTGAAGGGAGCTCTTT	0.411276	-1.28182	0.0492379	150.768	62.0072	154.462	128.292	169.55	110.248	30.8415	44.9316	150	149	158	85	31	57	middle
csn-miR8016_1ss12GA	ATTTTTGAATGAAAGGCCCATGTG	-inf	-inf	0.0511619	12.9933	0	13.3867	18.0814	7.5117	0	0	0	13	21	7	0	0	0	middle
csn-miR399b_1ss21GA	TGCCAAAGGAGAGTTGCCCTA	0.0184702	-5.75866	0.0514967	668.507	12.3475	393.878	930.761	680.882	19.4556	4.97444	12.6124	382.5	1081	634.5	15	5	16	middle
csn-miR394b_1ss6AG	TTGGCGTTCTGTCCACCTCC	-inf	-inf	0.0518652	2.91485	0	1.54462	3.44407	3.75585	0	0	0	1.5	4	3.5	0	0	0	low
csn-miR482-p3_2ss8CT18TA	TTTCCTATTCCTCCCATACCTA	0.43905	-1.18754	0.0529929	23572.1	10349.3	29920.3	22642.2	18153.6	10031.3	8963.94	12052.7	29056	26297	16917	7734	9010	15290	high
csn-miR399i_1ss7AG	TGCCAAGGGAGAGTTGCCCTA	0.170538	-2.55184	0.0533751	62.5135	10.6609	47.8832	88.6849	50.9723	12.3219	5.47189	14.1889	46.5	103	47.5	9.5	5.5	18	middle
csn-miR166e-5p_1ss20GT	GGAATGTTGGCTGGCTCGATG	0.0652048	-3.93888	0.0536427	103.282	6.73452	83.4095	150.248	76.1901	5.18816	3.97955	11.0358	81	174.5	71	4	4	14	middle
csn-miR167b_L-1R+1	GAAGCTGCCAGCATGATCTAG	0.451389	-1.14756	0.054379	632.851	285.662	798.054	448.591	651.908	406.622	211.911	238.453	775	521	607.5	313.5	213	302.5	middle
csn-miR165a-p5_2ss15AT19CT	TCGGACCAGGCTTCTTCCTC	-inf	-inf	0.0553865	4.32397	0	3.08924	3.44407	6.4386	0	0	0	3	4	6	0	0	0	low
csn-miR166d-p5_2ss10CG20AC	TCAACCCATGTTCTCCTTCC	-inf	-inf	0.0555608	3.30067	0	2.05949	3.01356	4.82895	0	0	0	2	3.5	4.5	0	0	0	low
csn-miR171e-5p	CGATGTTGGTGAGGTTCAATC	-inf	-inf	0.0575129	3.9735	0	2.57437	3.44407	5.90205	0	0	0	2.5	4	5.5	0	0	0	low
csn-miR171k-5p	CGATGTTGGTGAGGTTCAATC	-inf	-inf	0.0575129	3.9735	0	2.57437	3.44407	5.90205	0	0	0	2.5	4	5.5	0	0	0	low
csn-miR162_1ss20AG	TCGATAAACCTCTGCATCCGG	0.460823	-1.11772	0.057656	20.9077	9.63474	25.7437	21.956	15.0234	11.6734	8.954	8.27688	25	25.5	14	9	9	10.5	middle
csn-miR164a	TGGAGAAGCAGGGCACGTGCA	0.500067	-0.999807	0.0580534	33062	16533.2	42171.2	28181.1	28833.7	18689	13979.7	16930.9	40953	32730	26869.5	14409	14051.5	21478.5	high
csn-miR172d_L-2	AGAATCTTGATGATGCTGCAT	0.586113	-0.770748	0.0585936	1992.33	1167.73	2376.66	1957.96	1642.38	1146.58	1218.74	1137.87	2308	2274	1530.5	884	1225	1443.5	high
csn-miR390b-p3_2ss4AT21CA	ATATAGCTCAGGAGGGATAGA	-inf	-inf	0.0600505	9.8002	0	6.17848	14.6373	8.5848	0	0	0	6	17	8	0	0	0	middle
csn-miR482d-p5_2ss12TC21TG	CATGCCACGCACTTCTATTGGT	0.310064	-1.68936	0.0606745	24.1463	7.48692	20.0801	33.5797	18.7793	7.78224	9.94888	4.72964	19.5	39	17.5	6	10	6	middle
csn-miR393a_1ss4AC	TCCCAAGGGATCGCATTGATC	-inf	-inf	0.0612934	3.00133	0	3.08924	4.30509	1.60965	0	0	0	3	5	1.5	0	0	0	low
csn-miR171c-5p_1ss5AG	AGATGTTGGTGCGGTTCAATC	0.0544612	-4.19863	0.0640842	23.8159	1.29704	32.9519	26.6916	11.8041	3.89112	0	0	32	31	11	3	0	0	middle
csn-miR394b_1ss3GT	TTTGCATTCTGTCCACCTCC	0.069441	-3.84807	0.0678233	151.726	10.536	118.936	231.614	104.627	24.6437	6.96422	0	115.5	269	97.5	19	7	0	middle
csn-miR171a_R+1	TGATTGAGCCGTGCCAATATCT	0.0949954	-3.396	0.068701	32.8754	3.12301	47.8832	31.4272	19.3158	1.94556	3.48211	3.94137	46.5	36.5	18	1.5	3.5	5	middle
csn-miR8757b-p5_1ss1TG	GATTTTGGGTTGGGTCGA	0.316483	-1.6598	0.0688249	13.4825	4.26697	8.75285	12.9153	18.7793	5.83668	6.96422	0	8.5	15	17.5	4.5	7	0	middle
csn-miR164b-p5	TCATGTGCCCGTCTTCCCCAT	0.566287	-0.820394	0.0713849	232.17	131.475	250.229	174.787	271.494	121.922	139.284	133.218	243	203	253	94	140	169	middle
csn-miR159	TTTGGTTTGAAGGGAGCTCTA	0.518357	-0.947983	0.0714785	11.8108	6.12219	12.8718	8.61018	13.9503	6.4852	5.96933	5.91206	12.5	10	13	5	6	7.5	middle
csn-miR482a-5p_2ss3AG12AC	GGGATTGGTGGCTTGGAAAGC	0.641264	-0.641009	0.0722187	653.625	419.146	788.786	526.082	646.006	440.993	348.211	468.235	766	611	602	340	350	594	middle
csn-miR171a_L+2_1ss14CT	GGTGATTGAGCCGTGCCAATATC	-inf	-inf	0.0757034	3.54432	0	5.14874	3.87458	1.60965	0	0	0	5	4.5	1.5	0	0	0	low
csn-miR8005c-p3_1ss12AG	TAGGGTTTAGGGTTTAGGGTT	0.245987	-2.02334	0.0763512	10.7853	2.65304	9.7826	12.9153	9.6579	0	7.95911	0	9.5	15	9	0	8	0	middle
csn-miR8005a-p3_1ss12AG	TAGGGTTTAGGGTTTAGGGTT	0.245987	-2.02334	0.0763512	10.7853	2.65304	9.7826	12.9153	9.6579	0	7.95911	0	9.5	15	9	0	8	0	middle
csn-miR166g-5p_2ss11CT21GA	GGAATGTTGTTTGGCTCGAGA	0.35335	-1.50083	0.0957677	30.3281	10.7164	18.5354	41.3289	31.1199	10.3763	9.94888	11.8241	18	48	29	8	10	15	middle
csn-miR171b	TTGAGCCGCGCCAATATCACT	0.0484966	-4.36597	0.0960771	93.1649	4.51818	62.8146	152.831	63.8495	8.43076	0	5.12378	61	177.5	59.5	6.5	0	6.5	middle
csn-miR171k-3p	TTGAGCCGCGCCAATATCACT	0.0484966	-4.36597	0.0960771	93.1649	4.51818	62.8146	152.831	63.8495	8.43076	0	5.12378	61	177.5	59.5	6.5	0	6.5	middle
csn-miR395a	CTGAAGTGTTTGGGGGAACTC	0.190214	-2.39431	0.103086	14.3464	2.72888	6.17848	18.0814	18.7793	1.94556	3.48211	2.75896	6	21	17.5	1.5	3.5	3.5	middle
csn-miR396a_L+4	GATCTTCCACAGCTTTCTTGAACTG	0.0742719	-3.75104	0.103222	205.872	15.2905	339.302	141.494	136.82	23.9952	10.4463	11.43	329.5	164.333	127.5	18.5	10.5	14.5	middle
csn-miR396a-5p_L+4	GATCTTCCACAGCTTTCTTGAACTG	0.0742719	-3.75104	0.103222	205.872	15.2905	339.302	141.494	136.82	23.9952	10.4463	11.43	329.5	164.333	127.5	18.5	10.5	14.5	middle
csn-miR166a_R+2_1ss1TG	GCGGACCAGGCTTCATTCCCC	0.275068	-1.86214	0.105931	5932.16	1631.74	4074.19	4517.76	9204.52	2894.99	954.595	1045.65	3956.5	5247	8577.5	2232	959.5	1326.5	high
csn-miR394b_1ss14CA	TTGGCATTCTGTCAACCTCC	-inf	-inf	0.108862	5.24413	0	1.54462	7.74917	6.4386	0	0	0	1.5	9	6	0	0	0	low
csn-miR399a	TGCCAAAGGAGAATTGCCCTG	-inf	-inf	0.112543	49.5278	0	35.0114	85.6713	27.9006	0	0	0	34	99.5	26	0	0	0	middle
csn-miR169b	TAGCCAAGGATGATTTGCCTGC	0.28814	-1.79516	0.113011	7.74425	2.23143	4.63386	11.6237	6.97515	1.94556	1.98978	2.75896	4.5	13.5	6.5	1.5	2	3.5	middle
csn-miR530a_R+1_1ss8GA	TGCATTTACACCTGCACCTTG	0.608293	-0.717161	0.115637	608.065	369.882	585.926	734.449	503.821	272.378	279.564	557.704	569	853	469.5	210	281	707.5	middle
csn-miR159c_R-1_1ss19CA	TTTGGATTGAAGGGAGCTAT	0.220698	-2.17985	0.118665	5.25923	1.1607	7.7231	2.15255	5.90205	0	3.48211	0	7.5	2.5	5.5	0	3.5	0	low
csn-miR164b-5p_L+2	TCTGGAGAAGCAGGGCACGTGCA	0.266912	-1.90556	0.125416	130.305	34.78	208.009	89.5459	93.3597	50.5845	15.9182	37.8372	202	104	87	39	16	48	middle
csn-miR7499-p3_2ss10GC17CG_1	GGTTAATTCCGTTAACGA	0.202726	-2.3024	0.126546	7.28862	1.47759	3.60411	6.45764	11.8041	1.94556	2.48722	0	3.5	7.5	11	1.5	2.5	0	middle
csn-miR7499-p3_2ss10GC17CG_2	GGTTAATTCCGTTAACGAAC	0.202726	-2.3024	0.126546	7.28862	1.47759	3.60411	6.45764	11.8041	1.94556	2.48722	0	3.5	7.5	11	1.5	2.5	0	middle
csn-miR159c_1ss20TC	TTTGGATTGAAGGGAGCTCCA	0.594648	-0.749891	0.128814	58.7996	34.9651	47.3684	51.2306	77.7998	42.8023	42.7802	19.3127	46	59.5	72.5	33	43	24.5	middle
csn-miR7122a_2ss4TA21CG	TTAAACAGAGAAATCACGGTGG	0.741099	-0.432263	0.130665	307.041	227.548	321.281	357.323	242.521	245.14	186.044	251.459	312	415	226	189	187	319	middle
csn-miR167b_R+1	TGAAGCTGCCAGCATGATCTAG	0.501993	-0.99426	0.136979	8643	4338.73	12216.4	6981.57	6731.02	4261.42	4147.69	4607.07	11863.5	8108.5	6272.5	3285.5	4169	5844.5	high
csn-miR2916-p5_1ss5AG	TACCGTCCTAGTCTCAACCA	0.670084	-0.577586	0.139834	1136.5	761.549	1145.08	931.622	1332.79	761.362	1041.65	481.635	1112	1082	1242	587	1047	611	middle
csn-miR172e-p3_1ss16CT	TTTGTTTTTGCCTCTTGATCC	0.459227	-1.12272	0.144442	2.22757	1.02296	2.05949	3.01356	1.60965	0	1.49233	1.57655	2	3.5	1.5	0	1.5	2	low
csn-miR172e-p5_1ss16CT	TTTGTTTTTGCCTCTTGATCC	0.459227	-1.12272	0.144442	2.22757	1.02296	2.05949	3.01356	1.60965	0	1.49233	1.57655	2	3.5	1.5	0	1.5	2	low
csn-miR894_1ss3TA	CGATTCACGTCGGGTTCACC	0.648479	-0.624869	0.145359	21.8966	14.1995	16.476	22.3865	26.8275	19.4556	8.954	14.1889	16	26	25	15	9	18	middle
csn-miR166m-p5_2ss12TC20CT	GCGGACCAGGCCTCATTCCTC	-inf	-inf	0.145386	20.5945	0	16.476	7.74917	37.5585	0	0	0	16	9	35	0	0	0	middle
csn-miR5368-p3_1ss17CT	GAATTCTAACCTTGTGTCA	0.554304	-0.85125	0.147167	16.1772	8.9671	13.3867	18.5119	16.6331	8.43076	14.9233	3.54723	13	21.5	15.5	6.5	15	4.5	middle
csn-miR393b-p3_2ss1GA19GT	AATGCGATCCCTTGGGAAT	0.289433	-1.7887	0.147542	28.217	8.16693	19.5652	18.9424	46.1433	3.89112	11.9387	8.67102	19	22	43	3	12	11	middle
csn-miR399a_1ss13AT	TGCCAAAGGAGATTTGCCCTG	-inf	-inf	0.150209	97.0789	0	58.6956	182.105	50.4357	0	0	0	57	211.5	47	0	0	0	middle
csn-miR395a_1ss19CT	CTGAAGTGTTTGGGGGAATTC	0.366516	-1.44805	0.152046	8.27368	3.03243	7.20823	4.7356	12.8772	1.94556	5.96933	1.18241	7	5.5	12	1.5	6	1.5	middle
csn-miR3633a-3p_R-3_1ss7TA	TTCCTAAACCACCCATTCC	0.711319	-0.491432	0.154655	223.807	159.198	176.087	215.255	280.079	185.477	150.228	141.889	171	250	261	143	151	180	middle
csn-miR6173-p5_2	GGATTAGATACCCCAGTA	0.447498	-1.16005	0.168264	39.5179	17.6842	28.318	32.2882	57.9474	16.8615	33.8262	2.36482	27.5	37.5	54	13	34	3	middle
csn-miR6173-p5_1	GATACCCCAGTAGTCCTA	0.447498	-1.16005	0.168264	39.5179	17.6842	28.318	32.2882	57.9474	16.8615	33.8262	2.36482	27.5	37.5	54	13	34	3	middle
csn-miR6173-p5_3	TGGGATTAGATACCCCAGTA	0.447498	-1.16005	0.168264	39.5179	17.6842	28.318	32.2882	57.9474	16.8615	33.8262	2.36482	27.5	37.5	54	13	34	3	middle
csn-miR6173-p3_2	GATACCCCAGTAGTCCTA	0.447498	-1.16005	0.168264	39.5179	17.6842	28.318	32.2882	57.9474	16.8615	33.8262	2.36482	27.5	37.5	54	13	34	3	middle
csn-miR2680a-p5_2ss14TC20GC	TTTAACCCCTTCCCCTAGACTA	0.337252	-1.5681	0.180687	3.89558	1.31379	3.08924	4.30509	4.2924	0	0	3.94137	3	5	4	0	0	5	low
csn-miR1122c-3p_L-1R+4_1ss10AT	CTAATATTTTGGGACGGAGGGAGT	0.215401	-2.2149	0.181711	20.3991	4.39399	36.0411	15.4983	9.6579	3.89112	2.98467	6.30619	35	18	9	3	3	8	middle
csn-miR160c	TGCCTGGCTCCCTGTATGCCG	0.782143	-0.354495	0.182381	26.6466	20.8414	25.2288	30.5662	24.1448	26.5893	17.4105	18.5244	24.5	35.5	22.5	20.5	17.5	23.5	middle
csn-miR171e_L-2R+5	ATTGAACCGGACCAATATCCCGTC	-inf	-inf	0.186735	1.89077	0	3.08924	2.58306	0	0	0	0	3	3	0	0	0	0	low
csn-miR393a_R+1_1ss21CT	TCCAAAGGGATCGCATTGATTT	-inf	-inf	0.186735	1.89077	0	3.08924	2.58306	0	0	0	0	3	3	0	0	0	0	low
csn-miR2111a_L-1R+4	AATCTGCATCCTGAGGTTTAGATC	-inf	-inf	0.188368	1.93412	0	0	2.58306	3.2193	0	0	0	0	3	3	0	0	0	low
csn-miR171a-p5	GGATATTGGTCCGGTTCAATA	-inf	-inf	0.194138	2.46055	0	3.08924	0	4.2924	0	0	0	3	0	4	0	0	0	low
csn-miR395a_L-1	TGAAGTGTTTGGGGGAACTC	-inf	-inf	0.194981	3.94326	0	2.05949	1.72204	8.04825	0	0	0	2	2	7.5	0	0	0	low
csn-miR399e	TGCCAAAGGAGATTTGCCTCG	-inf	-inf	0.197571	3.38204	0	4.11899	6.02713	0	0	0	0	4	7	0	0	0	0	low
csn-miR171a-p3	AGATTGAGCCGTGCCAATATC	0.0775799	-3.68817	0.198181	58.5157	4.53964	30.3775	29.2746	115.895	13.6189	0	0	29.5	34	108	10.5	0	0	middle
csn-miR167a_L-2R+2	AGATCATCTTGCAGCTTCAAT	0.740715	-0.433009	0.206734	928.096	687.455	1082.78	692.259	1009.25	665.381	879.481	517.502	1051.5	804	940.5	513	884	656.5	middle
csn-miR477g-p5_1ss1CG	GCCTCAAAGGCTTCCAATATT	-inf	-inf	0.207625	1.14591	0	0	1.29153	2.1462	0	0	0	0	1.5	2	0	0	0	low
csn-miR164c-5p_1ss1TG	GGGAGAAGCAGGGCACGTGCG	-inf	-inf	0.207918	4.57785	0	5.14874	0	8.5848	0	0	0	5	0	8	0	0	0	low
csn-miR535d_L+1R-1	TTGACGACGAGAGAGAGCACG	0.62397	-0.680452	0.209822	27.5548	17.1934	21.1098	22.3865	39.1682	12.9704	18.9029	19.7069	20.5	26	36.5	10	19	25	middle
csn-miR160c	TGCCTGGCTCCCTGTATGCCA	0.727168	-0.459639	0.223821	916.69	666.588	758.924	1204.56	786.582	697.159	645.185	657.421	737	1399	733	537.5	648.5	834	middle
csn-miR160a	TGCCTGGCTCCCTGTATGCCA	0.727168	-0.459639	0.223821	916.69	666.588	758.924	1204.56	786.582	697.159	645.185	657.421	737	1399	733	537.5	648.5	834	middle
csn-miR160c_L+2	TCTGCCTGGCTCCCTGTATGCCA	-inf	-inf	0.227983	3.06402	0	6.17848	3.01356	0	0	0	0	6	3.5	0	0	0	0	low
csn-miR160a_L+2	TCTGCCTGGCTCCCTGTATGCCA	-inf	-inf	0.227983	3.06402	0	6.17848	3.01356	0	0	0	0	6	3.5	0	0	0	0	low
csn-miR5368-p3_2ss14TC17CT	ATTGGCTTTGGGCCTTTC	-inf	-inf	0.229357	1.32476	0	0	1.29153	2.68275	0	0	0	0	1.5	2.5	0	0	0	low
csn-miR394b_1ss18TG	TTGGCATTCTGTCCACCGCC	0.115541	-3.11352	0.229793	4.54829	0.525516	0	5.59662	8.04825	0	0	1.57655	0	6.5	7.5	0	0	2	low
csn-miR482d-p5_2ss13CT17CT	TATATACACACATACATACACA	-inf	-inf	0.230154	1.77538	0	3.60411	1.72204	0	0	0	0	3.5	2	0	0	0	0	low
csn-miR482d-p3_2ss13CT17CT	TATATACACACATACATACACA	-inf	-inf	0.230154	1.77538	0	3.60411	1.72204	0	0	0	0	3.5	2	0	0	0	0	low
csn-miR396a-3p_2ss2CT11GC	GTTCAAGAAACCTGTGGGAGA	-inf	-inf	0.236943	3.3258	0	3.08924	6.88815	0	0	0	0	3	8	0	0	0	0	low
csn-miR159c-p5_2ss13GT19CA	TTTGGATTGAAGTGAGCTAT	-inf	-inf	0.236943	1.6629	0	1.54462	3.44407	0	0	0	0	1.5	4	0	0	0	0	low
csn-miR319f-p5_1ss1AT	TGAGCTTCCTTCAGTCCACTC	0.363208	-1.46113	0.237204	7.95712	2.89009	2.05949	9.4712	12.3407	5.18816	3.48211	0	2	11	11.5	4	3.5	0	middle
csn-miR319m-p5_1ss1AT	TGAGCTTCCTTCAGTCCACTC	0.363208	-1.46113	0.237204	7.95712	2.89009	2.05949	9.4712	12.3407	5.18816	3.48211	0	2	11	11.5	4	3.5	0	middle
csn-miR395c-p3_1ss21CT	TACTGAAGTGTTTGGGGGAAT	-inf	-inf	0.239605	2.82837	0	0	2.58306	5.90205	0	0	0	0	3	5.5	0	0	0	low
csn-miR5368-p5	AGGGACAGTCTCAGGTAGA	0.718498	-0.476943	0.24483	11.7545	8.44561	11.8421	9.4712	13.9503	4.53964	10.9438	9.85343	11.5	11	13	3.5	11	12.5	middle
csn-miR6478_1ss21GA	CCGACCTTAGCTCAGTTGGTA	0.714364	-0.485269	0.245465	15.7735	11.268	11.3272	15.0678	20.9255	12.3219	10.4463	11.0358	11	17.5	19.5	9.5	10.5	14	middle
csn-miR171i-p3	TTGATTTGATTGAGCCGTGCC	-inf	-inf	0.249194	1.50361	0	0	1.29153	3.2193	0	0	0	0	1.5	3	0	0	0	low
csn-miR172c-5p	GTAGCATCATCAAGATTCACA	0.788795	-0.342278	0.257721	140.231	110.613	172.483	109.78	138.43	86.2531	127.346	118.241	167.5	127.5	129	66.5	128	150	middle
csn-miR845d_R+3_2ss1TA19AT	AGGCTCTGATACCAATTGTTGGGA	-inf	-inf	0.261728	1.63188	0	3.60411	1.29153	0	0	0	0	3.5	1.5	0	0	0	0	low
csn-miR171e-p3	TTGAGCCGTGCCAATATCGC	0.681483	-0.55325	0.261804	32.2613	21.9855	30.8924	37.4543	28.4372	12.9704	17.908	35.0782	30	43.5	26.5	10	18	44.5	middle
csn-miR164a_1ss13GT	TGGAGAAGCAGGTCACGTGAA	-inf	-inf	0.269334	6.87077	0	15.4462	5.16611	0	0	0	0	15	6	0	0	0	0	middle
csn-miR167k_R-3_1ss9CT	TGAAGCTGTCAGCCTGATC	0.563862	-0.826587	0.275837	5.50578	3.1045	8.23798	5.59662	2.68275	2.59408	1.98978	4.72964	8	6.5	2.5	2	2	6	low
csn-miR319a	TTGGACTGAAGGGAGCTCCC	0.330334	-1.598	0.275901	201.971	66.718	64.8741	376.409	164.631	123.543	46.2623	30.3486	63	437.167	153.417	95.25	46.5	38.5	middle
csn-miR319a_R-1	TTGGACTGAAGGGAGCTCCC	0.330334	-1.598	0.275901	201.971	66.718	64.8741	376.409	164.631	123.543	46.2623	30.3486	63	437.167	153.417	95.25	46.5	38.5	middle
csn-miR319b_R-1	TTGGACTGAAGGGAGCTCCC	0.330334	-1.598	0.275901	201.971	66.718	64.8741	376.409	164.631	123.543	46.2623	30.3486	63	437.167	153.417	95.25	46.5	38.5	middle
csn-miR159c_R-1	TTTGGATTGAAGGGAGCTCT	0.711518	-0.491028	0.279538	9715.46	6912.72	6323.16	10005	12818.2	8255.65	7588.51	4894	6140.5	11620	11945	6365	7627.5	6208.5	high
csn-miR399e_1ss21GA	TGCCAAAGGAGATTTGCCCGA	-inf	-inf	0.285617	46.5916	0	24.1991	110.21	5.3655	0	0	0	23.5	128	5	0	0	0	middle
csn-miR477a-p5_1ss19TG	CCCTCAAAGGCTTCCAATGTT	0.590271	-0.760552	0.293445	14.5606	8.59468	6.17848	17.6509	19.8524	8.43076	11.4412	5.91206	6	20.5	18.5	6.5	11.5	7.5	middle
csn-miR6149a_L-2R-1_1ss3GC	CATACGCACCTGAATCGG	0.56604	-0.821024	0.293546	9.70949	5.49596	4.63386	9.4712	15.0234	5.18816	6.96422	4.33551	4.5	11	14	4	7	5.5	middle
csn-miR166a_L+3R+2	CTATCGGACCAGGCTTCATTCCCC	-inf	-inf	0.294386	4.12188	0	9.7826	2.58306	0	0	0	0	9.5	3	0	0	0	0	low
csn-miR166m_L+1_1ss5AC	GCGGCCCAGGCTTCATTCCCC	0.173823	-2.52431	0.308822	4169.31	724.72	1539.82	1686.16	9281.96	2156.98	14.4259	2.75896	1495.33	1958.33	8649.67	1663	14.5	3.5	high
csn-miR172k	TGAATCTTGATGATGCTGCAT	0.355716	-1.4912	0.313823	6.07713	2.16173	3.08924	3.87458	11.2676	6.4852	0	0	3	4.5	10.5	5	0	0	middle
csn-miR482a-3p_1ss8TG	TTTCCAAGTCCACCCATTCCTA	0.799419	-0.322976	0.314098	62166.5	49697.1	79002.2	60436.6	47060.8	49024.2	42605.1	57462	76720	70192	43855	37797	42824	72896	high
csn-miR399c_L+2R-2	TTTGCCAAAGGAGATTTGCTC	-inf	-inf	0.315869	5.90885	0	3.08924	14.6373	0	0	0	0	3	17	0	0	0	0	middle
csn-miR403a_R+1_1ss21GT	TTAGATTCACGCACAAACTCTG	0.690644	-0.533986	0.341081	19.0652	13.1672	26.7734	18.0814	12.3407	13.6189	6.96422	18.9186	26	21	11.5	10.5	7	24	middle
csn-miR6173-p3_1	CGCTGTGCGTATCGACCCGTG	0.42517	-1.23389	0.342214	4.28996	1.82396	5.66361	5.59662	1.60965	0	5.47189	0	5.5	6.5	1.5	0	5.5	0	low
csn-miR2592bj-p3_2ss12TC19AT_2	ATTCCCACTGTCCCTGTCTA	0.809349	-0.305167	0.385429	6.24286	5.05265	6.69336	5.59662	6.4386	7.13372	4.477	3.54723	6.5	6.5	6	5.5	4.5	4.5	low
csn-miR2592bj-p3_2ss12TC19AT_1	ATTCCCACTGTCCCTGTCT	0.809349	-0.305167	0.385429	6.24286	5.05265	6.69336	5.59662	6.4386	7.13372	4.477	3.54723	6.5	6.5	6	5.5	4.5	4.5	low
csn-miR166c_1ss6CA	TCGGAACAGGCTTCATTCCTC	0.072992	-3.77612	0.404227	29.0925	2.12352	2.05949	4.7356	80.4825	5.18816	0	1.18241	2	5.5	75	4	0	1.5	middle
csn-miR9662a-3p	TTGAACATCCCAGAGCCACCG	0.319941	-1.64412	0.419672	9.50428	3.04081	21.6247	6.88815	0	0	5.96933	3.1531	21	8	0	0	6	4	middle
csn-miR482a-3p_2ss9CG21TG	TTCCCAAGGCCGCCCATTCCGA	0.774167	-0.369283	0.420657	1160.28	898.251	1557.49	1102.96	820.385	765.902	641.206	1287.65	1512.5	1281	764.5	590.5	644.5	1633.5	middle
csn-miR156h-3p_2ss6TC9TG	GCTCTCTAGTCTTCTGTCATC	-inf	-inf	0.42265	1.72204	0	0	5.16611	0	0	0	0	0	6	0	0	0	0	low
csn-miR8005c-p5_1ss11AG	AGGGTTTAGGGTTTAGGGTTTAGG	-inf	-inf	0.42265	1.373	0	4.11899	0	0	0	0	0	4	0	0	0	0	0	low
csn-miR167d-p3_1ss8AG	TTAGATCGTGTGGTAGCTTCA	-inf	-inf	0.42265	0.514874	0	1.54462	0	0	0	0	0	1.5	0	0	0	0	0	low
csn-miR169f-p3_2ss11AT18AC	GCAGTCATCCTGGCTAAC	-inf	-inf	0.42265	0.861018	0	0	2.58306	0	0	0	0	0	3	0	0	0	0	low
csn-miR171a-p5_2ss23GC24CT	ATTGGTGCGGTTCAATTTGAAACT	-inf	-inf	0.42265	1.373	0	4.11899	0	0	0	0	0	4	0	0	0	0	0	low
csn-miR171d_1ss2GA	TAATTGAGCCGTGCCAATATC	-inf	-inf	0.42265	0.686498	0	2.05949	0	0	0	0	0	2	0	0	0	0	0	low
csn-miR399d-p5_2ss8AG17TC	ACAGGGCGGTCCTCCTCTGGC	-inf	-inf	0.42265	0.430509	0	0	1.29153	0	0	0	0	0	1.5	0	0	0	0	low
csn-miR399b-p5_2ss1AC20CT	CCAGTGATAGGGCTACTCTTT	-inf	-inf	0.42265	1.72204	0	0	5.16611	0	0	0	0	0	6	0	0	0	0	low
csn-miR399e	TGCCAAAGGAGATTTGCCCGG	-inf	-inf	0.42265	0.717515	0	0	2.15255	0	0	0	0	0	2.5	0	0	0	0	low
csn-miR2586a-p3_2ss10AG24AG	ACACGACACGGACACGCCGACACG	-inf	-inf	0.42265	1.02975	0	3.08924	0	0	0	0	0	3	0	0	0	0	0	low
csn-miR167a_L+2R+2	GATCAGATCATCTTGCAGCTTCAAT	-inf	-inf	0.42265	1.71625	0	5.14874	0	0	0	0	0	5	0	0	0	0	0	low
csn-miR171a-3p	TGAGCCGAACCAATATCACTC	-inf	-inf	0.42265	0.574012	0	0	1.72204	0	0	0	0	0	2	0	0	0	0	low
csn-miR171n_R-1_1ss18CT	TTGAGCCGCGTCAATATTTT	-inf	-inf	0.42265	0.861018	0	0	2.58306	0	0	0	0	0	3	0	0	0	0	low
csn-miR396a_R-3_1ss4AC	CACCGCTTTCTTGAACTT	-inf	-inf	0.42265	0.430509	0	0	1.29153	0	0	0	0	0	1.5	0	0	0	0	low
csn-miR399a-3p_R+1_1ss20GC	TGCCAAAGGAGATTTGCCCCGT	-inf	-inf	0.42265	0.861018	0	0	2.58306	0	0	0	0	0	3	0	0	0	0	low
csn-miR5048a_L+2R-2	TATATTTGCAGGTTTTAGGTCT	-inf	-inf	0.42265	1.373	0	4.11899	0	0	0	0	0	4	0	0	0	0	0	low
csn-miR9773_R+1	TTTGTTTTTATGTTATTTTGTGAAG	-inf	-inf	0.42265	2.40274	0	7.20823	0	0	0	0	0	7	0	0	0	0	0	low
csn-miR6173-p5_1ss4CT	CAGTGCTGTAGCTAACGCGTT	0.333314	-1.58505	0.426338	1.94567	0.64852	1.54462	0	4.2924	1.94556	0	0	1.5	0	4	1.5	0	0	low
csn-miR403a-p5_1ss20TC	GGTTTGTGCGTGAATTTAACA	0.650383	-0.620638	0.446439	59.9615	38.998	104.004	40.4679	35.4123	51.8816	28.8518	36.2606	101	47	33	40	29	46	middle
csn-miR1520j-p5_2ss7AC20AC	TGCATTCTTATTTTCACTACC	0.663402	-0.592045	0.453509	5.77189	3.82908	7.20823	6.88815	3.2193	0	5.96933	5.51792	7	8	3	0	6	7	low
csn-miR535a_1ss5AG	TGACGACGAGAGAGAGCACGC	0.785969	-0.347456	0.457598	1074.25	844.33	803.203	850.686	1568.87	669.272	938.677	925.04	780	988	1462	516	943.5	1173.5	middle
csn-miR9863a-3p_1ss9TC	TGAGAAGGCAGATCATAATAGC	0.138021	-2.85704	0.480262	7.20823	0.994888	21.6247	0	0	0	2.98467	0	21	0	0	0	3	0	middle
csn-miR2603-p3_2ss9AC17AC	GTCCCTGCCCTTTGTACA	0.538669	-0.892528	0.484735	2.15476	1.1607	2.05949	1.72204	2.68275	0	3.48211	0	2	2	2.5	0	3.5	0	low
csn-miR2603-p5_2ss9AC17AC	GTCCCTGCCCTTTGTACA	0.538669	-0.892528	0.484735	2.15476	1.1607	2.05949	1.72204	2.68275	0	3.48211	0	2	2	2.5	0	3.5	0	low
csn-miR167a-p3_1	ATCATCTTGCAGCTTCAAT	0.473115	-1.07974	0.48695	1.4019	0.663259	2.05949	0	2.1462	0	1.98978	0	2	0	2	0	2	0	low
csn-miR167a-p3_2	GATCATCTTGCAGCTTCAAT	0.473115	-1.07974	0.48695	1.4019	0.663259	2.05949	0	2.1462	0	1.98978	0	2	0	2	0	2	0	low
csn-miR396e-5p	TCCACAGGCTTTCTTGAACTG	0.529128	-0.91831	0.501595	6.24341	3.30357	11.8421	6.88815	0	0	5.96933	3.94137	11.5	8	0	0	6	5	middle
csn-miR164b-p5_1ss22CT	TCATGTGCCCGTCTTCCCCATT	0.527898	-0.921668	0.513218	8.46164	4.46689	14.4165	7.74917	3.2193	0	0	13.4007	14	9	3	0	0	17	middle
csn-miR530a_R-1_1ss8GA	TGCATTTACACCTGCACCT	0.919196	-0.121555	0.528192	10.7594	9.88995	11.3272	8.61018	12.3407	9.07927	9.94888	10.6417	11	10	11.5	7	10	13.5	middle
csn-miR164b-p5_1ss10TG	TGAGTTAGTGCTTCATGTGCC	0.645989	-0.630419	0.557855	2.97542	1.92209	4.63386	0	4.2924	2.59408	1.98978	1.18241	4.5	0	4	2	2	1.5	low
csn-miR164b-p3_1ss10TG	TGAGTTAGTGCTTCATGTGCC	0.645989	-0.630419	0.557855	2.97542	1.92209	4.63386	0	4.2924	2.59408	1.98978	1.18241	4.5	0	4	2	2	1.5	low
csn-miR7757-5p_1ss2TC	ACAAAACCTTCAGCTATCCATC	0.443365	-1.17343	0.577929	26.8413	11.9005	71.0525	9.4712	0	0	23.8773	11.8241	69	11	0	0	24	15	middle
csn-miR159c_R-1_1ss3TG	TTGGGATTGAAGGGAGCTCT	0.74328	-0.428022	0.592254	3.01578	2.24157	2.05949	4.30509	2.68275	3.2426	3.48211	0	2	5	2.5	2.5	3.5	0	low
csn-miR166d-5p_L-1R+1_1ss20GA	GAATGTCGTCTGGTTCGAAAT	0.858071	-0.22083	0.597301	9.20318	7.89698	5.14874	11.1932	11.2676	8.43076	8.954	6.30619	5	13	10.5	6.5	9	8	middle
csn-miR156f	TTGACAGAAGATAGAGAGCAC	0.89019	-0.167814	0.59982	74.0843	65.9492	60.0686	98.1561	64.0283	73.0665	51.7342	73.0467	58.3333	114	59.6667	56.3333	52	92.6667	middle
csn-miR156f	TTGACAGAAGATAGAGAGCAC	0.89019	-0.167814	0.59982	74.0843	65.9492	60.0686	98.1561	64.0283	73.0665	51.7342	73.0467	58.3333	114	59.6667	56.3333	52	92.6667	middle
csn-miR482d-p3_2ss10TC19TG	TGCCACGCACTTCTATTGGTT	0.826588	-0.274759	0.600469	5.36517	4.43479	5.66361	7.74917	2.68275	3.89112	5.47189	3.94137	5.5	9	2.5	3	5.5	5	low
csn-miR395d-5p_2ss5TC8CG	GTTCCCCGGAACACTTCATTG	0.752253	-0.410711	0.601902	16.8877	12.7038	6.17848	19.8034	24.6813	5.18816	21.8875	11.0358	6	23	23	4	22	14	middle
csn-miR169e_R-3	TAGCCAAGGATGACTTGCC	0.578806	-0.788849	0.624217	1.14591	0.663259	0	1.29153	2.1462	0	1.98978	0	0	1.5	2	0	2	0	low
csn-miR169e	TAGCCAAGGATGACTTGCCTGC	0.883545	-0.178624	0.626598	117.146	103.504	85.469	164.024	101.945	101.169	108.443	100.899	83	190.5	95	78	109	128	middle
csn-miR160b	CGCCTGGCTCCCTGTATGCCA	0.615784	-0.699504	0.654515	3.51054	2.16173	0	5.16611	5.3655	6.4852	0	0	0	6	5	5	0	0	low
csn-miR6173_L-1R+1	GCCGTAAACGATGGATACTA	0.763891	-0.388562	0.664832	10.3931	7.93919	9.26772	6.88815	15.0234	4.53964	16.9131	2.36482	9	8	14	3.5	17	3	middle
csn-miR166a-p5_1ss19AC	GGAATGCTGTCTGGTTCGCGA	0.686143	-0.543418	0.670914	3.08214	2.11479	0	6.02713	3.2193	0	3.97955	2.36482	0	7	3	0	4	3	low
csn-miR169f_L+2R-2	TGCAGCCAAGGATGACTTGCC	0.900579	-0.151075	0.68433	65.481	58.9708	39.1304	71.4645	85.848	60.9608	59.1959	56.7557	38	83	80	47	59.5	72	middle
csn-miR159c_R-1_1ss6AC	TTTGGCTTGAAGGGAGCTCT	0.51481	-0.957888	0.695397	9.6579	4.97198	0	0	28.9737	14.916	0	0	0	0	27	11.5	0	0	middle
csn-miR172k_1ss5TA	TGAAACTTGATGATGCTGCAT	0.518008	-0.948955	0.697519	1.25195	0.64852	0	0	3.75585	1.94556	0	0	0	0	3.5	1.5	0	0	low
csn-miR482a-3p_R-1_2ss9CG21TG	TTCCCAAGGCCGCCCATTCCG	0.903316	-0.146698	0.702586	3.53065	3.18929	3.60411	4.30509	2.68275	3.2426	1.98978	4.33551	3.5	5	2.5	2.5	2	5.5	low
csn-miR535a_1ss5AC	TGACCACGAGAGAGAGCACGC	0.699689	-0.515215	0.732828	438.838	307.05	258.981	252.709	804.825	914.413	3.97955	2.75896	251.5	293.5	750	705	4	3.5	middle
csn-miR396b-p5_2ss18AT19CT	TTCCACAGCTTTCTTGATT	0.701577	-0.511326	0.749103	0.945383	0.663259	1.54462	1.29153	0	0	1.98978	0	1.5	1.5	0	0	2	0	low
csn-miR396b-p3_2ss18AT19CT	TTCCACAGCTTTCTTGATT	0.701577	-0.511326	0.749103	0.945383	0.663259	1.54462	1.29153	0	0	1.98978	0	1.5	1.5	0	0	2	0	low
csn-miR5368-p3_1ss5AT	TCAGTGAGATACCACTCTGGA	0.880726	-0.183235	0.752332	119.709	105.431	93.1921	116.237	149.697	94.6839	175.1	46.5082	90.5	135	139.5	73	176	59	middle
csn-miR6725	TGGCATCTGTCGAGGTCATCTA	0.604342	-0.726563	0.755375	3.577	2.16173	0	0	10.731	6.4852	0	0	0	0	10	5	0	0	middle
csn-miR166g-5p	GGAATGTTGTCTGGCTCGAGG	0.972924	-0.0396005	0.755496	551.643	536.707	531.864	568.272	554.793	571.346	454.664	584.111	516.5	660	517	440.5	457	741	middle
csn-miR166e-5p_1ss10GT	GGAATGTTGTCTGGCTCGAGG	0.972924	-0.0396005	0.755496	551.643	536.707	531.864	568.272	554.793	571.346	454.664	584.111	516.5	660	517	440.5	457	741	middle
csn-miR172e-p5_2ss1CT17CT	TTTTGTTTTTGCCTCTTGATC	0.785675	-0.347996	0.783908	2.46188	1.93424	5.66361	1.72204	0	1.94556	1.49233	2.36482	5.5	2	0	1.5	1.5	3	low
csn-miR167b	TGAAGCTGCCAGCATGATCTA	0.957613	-0.0624853	0.794445	748.345	716.625	617.505	847.744	779.786	580.965	888.104	680.806	599.667	984.583	726.667	447.917	892.667	863.667	middle
csn-miR167a	TGAAGCTGCCAGCATGATCTA	0.957613	-0.0624853	0.794445	748.345	716.625	617.505	847.744	779.786	580.965	888.104	680.806	599.667	984.583	726.667	447.917	892.667	863.667	middle
csn-miR167a	TGAAGCTGCCAGCATGATCTA	0.957613	-0.0624853	0.794445	748.345	716.625	617.505	847.744	779.786	580.965	888.104	680.806	599.667	984.583	726.667	447.917	892.667	863.667	middle
csn-miR472-p5_2ss7TG19AG	TTTTCCGACTCCGCCCATGCCAT	0.8362	-0.25808	0.815552	1.40401	1.17404	2.05949	2.15255	0	1.94556	0	1.57655	2	2.5	0	1.5	0	2	low
csn-miR169i_R+1	TAGCCAAGGATGACTTGCCTGT	0.87219	-0.197286	0.843485	9.15549	7.98533	6.17848	13.7763	7.5117	16.8615	0	7.09447	6	16	7	13	0	9	middle
csn-miR482b-p5_2ss9TA19AC	CCCAAACCACCCATTCCTC	0.755428	-0.404634	0.855462	1.4308	1.08087	0	0	4.2924	3.2426	0	0	0	0	4	2.5	0	0	low
csn-miR535a_L-1_1ss5AC	GACCACGAGAGAGAGCACGC	0.815896	-0.293543	0.86427	1.32476	1.08087	0	1.29153	2.68275	3.2426	0	0	0	1.5	2.5	2.5	0	0	low
csn-miR5368-p3_1ss16AG	GCTTAGGTGGAGGGCGAA	0.891014	-0.16648	0.872895	3.4514	3.07524	1.54462	3.44407	5.3655	0	6.46677	2.75896	1.5	4	5	0	6.5	3.5	low
csn-miR169c-p3_2ss10CA21TC	CAAGTTGTCATTGGCTACATC	0.956201	-0.0646139	0.875328	38.4211	36.7383	38.6155	46.0645	30.5834	35.0201	52.7291	22.4658	37.5	53.5	28.5	27	53	28.5	middle
csn-miR168_L+2	TCTCGCTTGGTGCAGGTCGGGAA	0.95512	-0.0662458	0.927911	28.2283	26.9614	28.8329	17.2204	38.6316	42.8023	4.97444	33.1075	28	20	36	33	5	42	middle
csn-miR172c-5p_L+1R-1_2ss3TC4AG	TGCGGCATCATCAAGATTCAC	0.981849	-0.0264269	0.943208	665.143	653.07	950.971	512.736	531.721	623.227	570.568	765.414	923.5	595.5	495.5	480.5	573.5	971	middle
csn-miR172e-3p_L+1_1ss4AC	GGACTCTTGATGATGCTGCAT	0.906513	-0.1416	0.948135	0.7154	0.64852	0	0	2.1462	1.94556	0	0	0	0	2	1.5	0	0	low
csn-miR172c-3p_1ss4AC	GGACTCTTGATGATGCTGCAT	0.906513	-0.1416	0.948135	0.7154	0.64852	0	0	2.1462	1.94556	0	0	0	0	2	1.5	0	0	low
csn-miR2118e-p3_2ss13TA19CT	GAAAAGAGAGTCAAAGAGT	0.915514	-0.127347	0.953324	0.717515	0.656895	0	2.15255	0	0	0	1.97069	0	2.5	0	0	0	2.5	low
csn-miR482a-3p_R-3_1ss9CG	TTCCCAAGGCCGCCCATTC	0.94623	-0.0797374	0.963056	1.05142	0.994888	1.54462	0	1.60965	0	2.98467	0	1.5	0	1.5	0	3	0	low
csn-miR2592bj-p3_2ss10TC17AT	TCCCACTGTCCCTGTCTA	0.97163	-0.0415205	0.98154	1.0731	1.04266	0	0	3.2193	1.94556	0	1.18241	0	0	3	1.5	0	1.5	low
csn-miR444a-3p.2	TGCAGTTGCTGCCTCAAGCTT	0.966148	-0.0496834	0.981745	0.514874	0.497444	1.54462	0	0	0	1.49233	0	1.5	0	0	0	1.5	0	low
csn-miR1083_R-1_1ss20GC	TAGCCTGGAACGAAGCACGC	0.966947	-0.0484906	0.982182	1.7885	1.72939	0	0	5.3655	5.18816	0	0	0	0	5	4	0	0	low
Note: red is pvalue<=0.001,orange is pvalue <=0.01,blue is pvalue<=0.05,green is pvalue <=0.1.
Log2 (fold change), negative mumbers indicated the miRNAs were down-regulated while positive numbers indicated the miRNAs were up-regulated; -inf or inf indicated the miRNAs were not detected in one of the libraries.
