# Supplementary material for: Identification of Regulatory Networks of MicroRNAs and Their Targets in Response to Colletotrichum gloeosporioides in Tea Plant (Camellia sinensis L.)
Source: Front Plant Sci. 2019 Sep 12;10:1096. doi: 10.3389/fpls.2019.01096 (PMC6751461; doi:10.3389/fpls.2019.01096)
Supplement: Supplementary file 6 [file Table_6.xls]

## Sheet: Conerved miRNAs targets
Table S6: Identified target genes of conserved miRNAs and their characteristics in CgIL library vs. CK library.
Small RNA	Transcript ID	Transcript Annotation	Alignment Score	Alignment Range	Degradome Detection	CgIL TPB	CK TPB	up/down	log2 (fold change)	Degradome Cleavage Site	CgIL Degradome Read Number (Raw)	CgIL Degradome Read Number (Normalized)	CK Degradome Read Number (Raw)	CK Degradome Read Number (Normalized)	CgIL Degradome Category	CK Degradome Category	pvalue (chis_quare2x2)	pvalue (fisher exact test)
csn-miR156a_R+1	Unigene375_All	uncharacterized LOC103401427	3	1012-1032	Y	492.514	166.144	up	1.56773	1023	7	7	3	3	2	2	0	9.80233e-130
csn-miR156a_R+2	CL747.Contig4_EL	uncharacterized LOC103401427	2	1141-1161	Y	70.3592	41.5359	up	0.760378	1152	2	1	2	0.75	2	2	3.5774e-15	2.61891e-13
csn-miR156a_R+3	CL5803.Contig4_All	uncharacterized LOC103401427	2	1406-1426	Y	70.3592	41.5359	up	0.760378	1417	2	1	2	0.75	2		3.5774e-15	2.61891e-13
csn-miR156a-p3_1ss10TA	CL8557.Contig2_All	glyceraldehyde-3-phosphate dehydrogenase 2	4	362-381	Y	211.077	55.3812	up	1.9303	373	3	3	1	1	2		1.4969e-72	2.22347e-64
csn-miR156b-5p_R+1	Unigene375_All	uncharacterized LOC103401427	3	1012-1032	Y	492.514	166.144	up	1.56773	1023	7	7	3	3	2	2	0	9.80233e-130
csn-miR156b-5p_R+2	CL747.Contig4_EL	uncharacterized LOC103401427	2	1141-1161	Y	70.3592	41.5359	up	0.760378	1152	2	1	2	0.75	2	2	3.5774e-15	2.61891e-13
csn-miR156b-5p_R+3	CL5803.Contig4_All	uncharacterized LOC103401427	2	1406-1426	Y	70.3592	41.5359	up	0.760378	1417	2	1	2	0.75	0	0	3.5774e-15	2.61891e-13
csn-miR156c-p3_1ss5AG	CL5115.Contig1_All	U2 small nuclear ribonucleoprotein A	4	971-988	Y	281.437	110.762	up	1.34534	979	4	4	2	2	0	0	2.9693e-77	8.34695e-68
	Unigene5197_All	hypothetical protein	4	2968-2986	Y	140.718	55.3812	up	1.34534	2977	2	2	1	1	0		1.5959e-39	3.79447e-35
csn-miR156d-p5	Unigene35969_All	uncharacterized LOC103401427	3	960-980	Y	140.718	0	up	-	971	2	2			0	2	1.4348e-76	2.46543e-76
csn-miR156f	Unigene375_All	uncharacterized LOC103401427	4	1013-1033	Y	422.155	0	up	-	1024	6	6			0	2	0	4.96795e-227
csn-miR157f	Unigene375_All	uncharacterized LOC103401427	4	1013-1033	Y	422.155	0	up	-	1024	6	6			0	0	0	4.96795e-227
csn-miR158f	CL3911.Contig4_All	uncharacterized LOC103401427	3	602-622	Y	175.898	166.144	up	0.0823065	613	5	2.5	6	3	0	0	9.5357e-20	5.67173e-18
csn-miR159f	CL5803.Contig3_All	uncharacterized LOC103401427	3	1399-1419	Y	175.898	166.144	up	0.0823065	1410	5	2.5	6	3	4		9.5357e-20	5.67173e-18
csn-miR160f	CL5803.Contig3_All	uncharacterized LOC103401427	3	1399-1419	Y	175.898	166.144	up	0.0823065	1410	5	2.5	6	3	0	0	9.5357e-20	5.67173e-18
csn-miR161f	CL3911.Contig4_All	uncharacterized LOC103401427	3	602-622	Y	175.898	166.144	up	0.0823065	613	5	2.5	6	3	0	0	9.5357e-20	5.67173e-18
csn-miR156f_1ss12TA	Unigene375_All	uncharacterized LOC103401427	4	1013-1033	Y	422.155	0	up	-	1024	6	6			4		0	4.96795e-227
	CL3911.Contig4_All	uncharacterized LOC103401427	3	602-622	Y	175.898	166.144	up	0.0823065	613	5	2.5	6	3	4		9.5357e-20	5.67173e-18
	CL5803.Contig3_All	uncharacterized LOC103401427	3	1399-1419	Y	175.898	166.144	up	0.0823065	1410	5	2.5	6	3	0	0	9.5357e-20	5.67173e-18
csn-miR156h_L+1	Unigene375_All	uncharacterized LOC103401427	4	1013-1033	Y	422.155	0	up	-	1024	6	6			2		0	4.96795e-227
	CL5803.Contig3_All	uncharacterized LOC103401427	3	1399-1419	Y	175.898	166.144	up	0.0823065	1410	5	2.5	6	3	2		9.5357e-20	5.67173e-18
	CL3911.Contig4_All	uncharacterized LOC103401427	3	602-622	Y	175.898	166.144	up	0.0823065	613	5	2.5	6	3	2	2	9.5357e-20	5.67173e-18
csn-miR156t	Unigene375_All	uncharacterized LOC103401427	2	1013-1033	Y	422.155	0	up	-	1024	6	6			2	2	0	4.96795e-227
	CL3911.Contig4_All	uncharacterized LOC103401427	1	602-622	Y	175.898	166.144	up	0.0823065	613	5	2.5	6	3	0	0	9.5357e-20	5.67173e-18
	CL5803.Contig3_All	uncharacterized LOC103401427	1	1399-1419	Y	175.898	166.144	up	0.0823065	1410	5	2.5	6	3	0	0	9.5357e-20	5.67173e-18
csn-miR159a-5p_L-1R-1	CL7522.Contig2_All	Pathogenesis-related genes transcriptional activator PTI6	4	570-588	Y	281.437	0	up	-	579	4	4			4		0	2.06423e-151
csn-miR159a-p3_2ss9AT18TG	CL9670.Contig2_All	DEAD-box ATP-dependent RNA helicase 20-like	3.5	1028-1046	Y	211.077	0	up	-	1037	3	3			4		0	7.14416e-114
	CL4707.Contig5_All	phospholipase A(1) DAD1	3	833-851	Y	140.718	18.4604	up	2.9303	842	6	2	1	0.333333	4		5.5102e-61	1.29521e-55
csn-miR159b_R-1	CL7595.Contig4_All	carbonic anhydrase 2-like	4	327-346	Y	70.3592	55.3812	up	0.345341	337	2	1	2	1	2		3.308e-11	5.66774e-10
csn-miR159b-p5_2ss11CA18TG	CL3862.Contig4_All	lysosomal alpha-mannosidase-like	0	814-831	Y	3869.75	332.287	up	3.54174	822	55	55	6	6	2		0	0
	CL8702.Contig1_All	oxygen-evolving enhancer protein 1, chloroplastic	4	740-758	Y	3869.75	3101.35	up	0.319346	748	55	55	56	56	4		0	0
csn-miR159c_R-1_1ss19CA	CL564.Contig1_EL	photosystem II 22 kDa protein	3.5	304-324	Y	844.31	664.575	up	0.345341	314	12	12	12	12	4		0	2.6783e-104
csn-miR159c-p3_2ss11CA18TG	CL8702.Contig1_All	oxygen-evolving enhancer protein 1, chloroplastic	4	740-758	Y	3869.75	3101.35	up	0.319346	748	55	55	56	56	4		0	0
	CL3862.Contig4_All	lysosomal alpha-mannosidase-like	0	814-831	Y	3869.75	332.287	up	3.54174	822	55	55	6	6	2		0	0
csn-miR159c-p5_2ss13GT19CA	Unigene23075_All	flavonoid 3'-monooxygenase-like	3.5	391-409	Y	70.3592	0	up	-	400	1	1			2		3.5063e-39	2.91538e-38
csn-miR160a	CL13416.Contig6_All	hypothetical protein	4	237-256	Y	140.718	0	up	-	247	2	2			4		1.4348e-76	2.46543e-76
csn-miR160c	CL13416.Contig6_All	hypothetical protein	4	237-256	Y	140.718	0	up	-	247	2	2			4		1.4348e-76	2.46543e-76
csn-miR160c-p5_2ss13AG17AG	Unigene28815_All	beta-amylase family protein	4	1354-1370	Y	773.951	203.065	up	1.9303	1361	33	11	11	3.66667	4		0	9.27819e-231
	CL5722.Contig2_All	beta-amylase family protein	4	2334-2350	Y	773.951	203.065	up	1.9303	2341	33	11	11	3.66667	4		0	9.27819e-231
	CL5722.Contig3_All	Chloroplast beta-amylase isoform 1	4	1622-1638	Y	773.951	203.065	up	1.9303	1629	33	11	11	3.66667	4		0	9.27819e-231
csn-miR164a	CL2400.Contig2_All	NAC domain-containing protein 89-like	2	1391-1411	Y	13860.8	7531.85	up	0.87993	1402	197	197	136	136	2		0	0
csn-miR164a-p3_2ss15CG18CG	CL851.Contig2_CKL	pyruvate decarboxylase 1-like	3.5	2337-2357	Y	386.975	138.453	up	1.48284	2348	11	5.5	5	2.5	4		0	7.39702e-99
	CL2841.Contig2_All	40S ribosomal protein S9-2	3.5	666-685	Y	422.155	221.525	up	0.930303	676	6	6	4	4	4		0	2.5491e-81
	CL1252.Contig1_All	calreticulin	3	814-834	Y	1688.62	1439.91	up	0.229864	825	24	24	27	26	2		0	2.32248e-185
	CL4656.Contig3_All	CCT motif-containing response regulator protein isoform 2	2	1927-1947	Y	140.718	0	up	-	1938	2	2			4	4	1.4348e-76	2.46543e-76
	Unigene9184_All	calnexin homolog 1	1.5	975-995	Y	211.077	55.3812	up	1.9303	986	3	3	1	1	2		1.4969e-72	2.22347e-64
	CL5596.Contig2_All	hypothetical protein	4	1919-1939	Y	140.718	55.3812	up	1.34534	1930	2	2	1	1	4		1.5959e-39	3.79447e-35
	Unigene647_All	hypothetical protein	4	736-756	Y	70.3592	0	up	-	747	1	1			2		3.5063e-39	2.91538e-38
	CL3909.Contig2_All	SCAR-like protein 2	4	896-916	Y	70.3592	0	up	-	907	2	1			2	2	3.5063e-39	2.91538e-38
	Unigene42688_CKL	protein STABILIZED1	4	627-646	Y	70.3592	0	up	-	638	1	1			2	2	3.5063e-39	2.91538e-38
	Unigene7976_All	putative E3 ubiquitin-protein ligase SINA-like 6	3	7-27	Y	70.3592	0	up	-	18	1	1			2		3.5063e-39	2.91538e-38
	CL2841.Contig5_All	40S ribosomal protein S9-2	3.5	666-685	Y	105.539	27.6906	up	1.9303	676	3	1.5	1	0.5	2	2	3.6347e-37	6.09585e-33
	CL4458.Contig1_EL	succinate dehydrogenase [ubiquinone] flavoprotein subunit 1	3.5	1166-1186	Y	70.3592	18.4604	up	1.9303	1177	3	1	1	0.333333	4		2.4664e-25	1.61467e-22
	CL4299.Contig2_All	uncharacterized LOC104609178	4	567-586	Y	70.3592	55.3812	up	0.345341	578	1	1	1	1	4		3.308e-11	5.66774e-10
csn-miR164b-p3_2ss6CG21CT	Unigene23075_All	flavonoid 3'-monooxygenase-like	4	367-386	Y	140.718	0	up	-	378	2	2			4		1.4348e-76	2.46543e-76
	Unigene19682_All	serine/arginine-rich splicing factor 2-like	3	18-37	Y	70.3592	0	up	-	29	1	1			4	4	3.5063e-39	2.91538e-38
	CL1431.Contig1_All	60S ribosomal protein L5	4	402-421	Y	35.1796	0	up	-	413	1	0.5			4	4	2.0504e-20	1.70808e-19
csn-miR164b-p5_2ss6CG21CT	Unigene23075_All	flavonoid 3'-monooxygenase-like	4	367-386	Y	140.718	0	up	-	378	2	2			4		1.4348e-76	2.46543e-76
	Unigene19682_All	serine/arginine-rich splicing factor 2-like	3	18-37	Y	70.3592	0	up	-	29	1	1			4		3.5063e-39	2.91538e-38
	CL1431.Contig1_All	60S ribosomal protein L5	4	402-421	Y	35.1796	0	up	-	413	1	0.5			4		2.0504e-20	1.70808e-19
csn-miR164c-5p_1ss1TG	CL2400.Contig2_All	NAC domain-containing protein 89-like	3	1391-1411	Y	13860.8	7531.85	up	0.87993	1402	197	197	136	136	2		0	0
csn-miR166a-5p_2ss13GT19AC	CL10387.Contig3_All	isopentenyl-diphosphate Delta-isomerase I	3.5	548-568	Y	105.539	55.3812	up	0.930303	559	3	1.5	2	1	4		2.1496e-24	6.47482e-22
csn-miR166b-p3_2ss6CG17TA	Unigene23208_All	ribosome biogenesis protein BMS1 homolog	4	979-996	Y	70.3592	0	up	-	987	1	1			4		3.5063e-39	2.91538e-38
	CL5227.Contig1_All	uroporphyrinogen-III synthase	3.5	1994-2012	Y	35.1796	0	up	-	2003	1	0.5			2		2.0504e-20	1.70808e-19
	Unigene12283_All	uroporphyrinogen-III synthase	3.5	985-1003	Y	35.1796	0	up	-	994	1	0.5			4		2.0504e-20	1.70808e-19
	CL12990.Contig1_All	ADP-ribosylation factor GTPase-activating protein AGD7-like	4	1434-1451	Y	35.1796	27.6906	up	0.345341	1442	1	0.5	1	0.5	4		2.7372e-06	1.81207e-05
	CL12990.Contig2_All	ADP-ribosylation factor GTPase-activating protein AGD7-like	4	1377-1394	Y	35.1796	27.6906	up	0.345341	1385	1	0.5	1	0.5	4		2.7372e-06	1.81207e-05
csn-miR166d-p5_2ss10CG20AC	CL10911.Contig6_All	hypothetical protein	2.5	4383-4403	Y	23.4531	0	up	-	4394	1	0.333333			4		4.0156e-14	4.64637e-13
	CL10911.Contig4_All	hypothetical protein	2.5	4046-4066	Y	23.4531	0	up	-	4057	1	0.333333			2	2	4.0156e-14	4.64637e-13
	CL10911.Contig3_All	hypothetical protein	2.5	3496-3516	Y	23.4531	0	up	-	3507	1	0.333333			2		4.0156e-14	4.64637e-13
csn-miR166e-p5_2ss10GT17CT	CL2254.Contig2_All	digalactosyldiacylglycerol synthase 1	4	1615-1631	Y	158.308	13.8453	up	3.51527	1623	9	2.25	1	0.25	2	4	1.0565e-73	2.10081e-67
	CL2254.Contig4_All	digalactosyldiacylglycerol synthase 1	4	1586-1602	Y	158.308	13.8453	up	3.51527	1594	9	2.25	1	0.25	3	3	1.0565e-73	2.10081e-67
	CL3194.Contig1_All	nucleolar GTP-binding protein 1	3.5	1480-1497	Y	46.9061	36.9208	up	0.345341	1488	2	0.666667	2	0.666667	4		6.125e-08	3.73998e-07
	CL4786.Contig2_CKL	nucleolar GTP-binding protein 1	3.5	1344-1361	Y	46.9061	36.9208	up	0.345341	1352	2	0.666667	2	0.666667	4		6.125e-08	3.73998e-07
	Unigene31149_All	hypothetical protein	3.5	1233-1250	Y	46.9061	36.9208	up	0.345341	1241	2	0.666667	2	0.666667	4		6.125e-08	3.73998e-07
	CL9659.Contig1_All	cysteine protease ATG4-like	3.5	717-733	Y	35.1796	27.6906	up	0.345341	724	1	0.5	1	0.5	4	4	2.7372e-06	1.81207e-05
csn-miR166g-p5	CL12538.Contig3_All	probable disease resistance protein At4g27220	4	1351-1371	Y	70.3592	0	up	-	1362	1	1			4	4	3.5063e-39	2.91538e-38
csn-miR167a-p3_1	Unigene483_All	phytoene desaturase	3.5	1011-1028	Y	140.718	110.762	up	0.345341	1020	2	2	2	2	0	0	6.6321e-21	7.33073e-19
	CL851.Contig2_CKL	pyruvate decarboxylase 1-like	4	2314-2331	Y	70.3592	27.6906	up	1.34534	2323	2	1	1	0.5	0	0	1.3812e-20	5.91379e-18
csn-miR167a-p3_2	Unigene483_All	phytoene desaturase	4	1011-1029	Y	140.718	110.762	up	0.345341	1020	2	2	2	2	2	2	6.6321e-21	7.33073e-19
csn-miR167b_L-1R+1	CL1028.Contig5_All	Transcriptional factor B3 family protein / auxin-responsive factor AUX/IAA-related isoform 1	4	2628-2649	Y	35.1796	27.6906	up	0.345341	2640	1	0.5	1	0.5	2	2	2.7372e-06	1.81207e-05
csn-miR167c_L-1R+1	CL6842.Contig1_All	auxin response factor 5-like	4	924-944	Y	35.1796	27.6906	up	0.345341	935	1	0.5	1	0.5	2	2	2.7372e-06	1.81207e-05
	CL1028.Contig5_All	Transcriptional factor B3 family protein / auxin-responsive factor AUX/IAA-related isoform 1	4	2629-2649	Y	35.1796	27.6906	up	0.345341	2640	1	0.5	1	0.5	2	2	2.7372e-06	1.81207e-05
csn-miR167k_R-3_1ss9CT	CL6842.Contig1_All	auxin response factor 5-like	4	927-946	Y	1231.29	969.172	up	0.345341	936	35	17.5	35	17.5	0	0	0	1.29141e-151
	CL1028.Contig5_All	Transcriptional factor B3 family protein / auxin-responsive factor AUX/IAA-related isoform 1	4	2632-2651	Y	1231.29	969.172	up	0.345341	2641	35	17.5	35	17.5	0	0	0	1.29141e-151
	CL4674.Contig1_All	uncharacterized LOC100527647	3.5	141-159	Y	175.898	138.453	up	0.345341	150	5	2.5	5	2.5	2		9.9524e-26	2.86584e-23
csn-miR169a_R-2	CL531.Contig2_All	nuclear transcription factor Y subunit A-3	2	1184-1202	Y	1055.39	803.028	up	0.394251	1193	30	15	29	14.5	2		0	5.37047e-136
	Unigene12037_All	hypothetical protein	3.5	1206-1224	Y	1125.75	996.862	up	0.175416	1215	16	16	18	18	4		0	1.91178e-117
	CL531.Contig3_All	nuclear transcription factor Y subunit A-3	2	758-776	Y	1055.39	803.028	up	0.394251	767	30	15	29	14.5	2	2	0	5.37047e-136
csn-miR169c-p3_2ss10CA21TC	Unigene568_All	UDP-glucosyl transferase 73C6	3.5	164-183	Y	1829.34	775.337	up	1.23843	174	26	26	14	14	2	2	0	0
	CL1779.Contig3_All	hypothetical protein	3.5	820-837	Y	140.718	0	up	-	828	4	2			2	4	1.4348e-76	2.46543e-76
csn-miR169d-p3_1ss9CA	CL12654.Contig2_All	calcium-dependent protein kinase 13	4	1556-1575	Y	211.077	0	up	-	1566	3	3			4		0	7.14416e-114
	Unigene568_All	UDP-glucosyl transferase 73C6	4	164-182	Y	1266.46	387.669	up	1.70791	173	18	18	7	7	4		0	0
csn-miR169e	CL531.Contig2_All	nuclear transcription factor Y subunit A-3	4	1181-1202	Y	1055.39	803.028	up	0.394251	1193	30	15	29	14.5	4	4	0	5.37047e-136
	CL531.Contig3_All	nuclear transcription factor Y subunit A-3	4	755-776	Y	1055.39	803.028	up	0.394251	767	30	15	29	14.5	2	4	0	5.37047e-136
csn-miR169e_R-1_1ss21GT	CL531.Contig3_All	nuclear transcription factor Y subunit A-3	3.5	756-776	Y	1055.39	803.028	up	0.394251	767	30	15	29	14.5	3	4	0	5.37047e-136
	CL531.Contig2_All	nuclear transcription factor Y subunit A-3	3.5	1182-1202	Y	1055.39	803.028	up	0.394251	1193	30	15	29	14.5	2	4	0	5.37047e-136
csn-miR169e_R-2_1ss13AG	CL531.Contig3_All	nuclear transcription factor Y subunit A-3	3.5	757-776	Y	1055.39	803.028	up	0.394251	767	30	15	29	14.5	2	4	0	5.37047e-136
	CL531.Contig2_All	nuclear transcription factor Y subunit A-3	3.5	1183-1202	Y	1055.39	803.028	up	0.394251	1193	30	15	29	14.5	2	4	0	5.37047e-136
csn-miR169e_R-3	Unigene12037_All	hypothetical protein	4	1206-1224	Y	1125.75	996.862	up	0.175416	1215	16	16	18	18	2	2	0	1.91178e-117
	CL531.Contig2_All	nuclear transcription factor Y subunit A-3	2	1184-1202	Y	1055.39	803.028	up	0.394251	1193	30	15	29	14.5	2	2	0	5.37047e-136
	CL531.Contig3_All	nuclear transcription factor Y subunit A-3	2	758-776	Y	1055.39	803.028	up	0.394251	767	30	15	29	14.5	0	1	0	5.37047e-136
	Unigene37816_All	calcium-dependent protein kinase 32	4	1649-1667	Y	70.3592	55.3812	up	0.345341	1658	1	1	1	1	2	2	3.308e-11	5.66774e-10
csn-miR169f_L+2R-2	CL531.Contig2_All	nuclear transcription factor Y subunit A-3	3	1184-1203	Y	35.1796	0	up	-	1195	1	0.5			3		2.0504e-20	1.70808e-19
	CL531.Contig3_All	nuclear transcription factor Y subunit A-3	3	758-777	Y	35.1796	0	up	-	769	1	0.5			2		2.0504e-20	1.70808e-19
csn-miR169f_R-1_1ss20GA	CL531.Contig2_All	nuclear transcription factor Y subunit A-3	3	1183-1202	Y	1055.39	803.028	up	0.394251	1193	30	15	29	14.5	4		0	5.37047e-136
	CL531.Contig3_All	nuclear transcription factor Y subunit A-3	3	757-776	Y	1055.39	803.028	up	0.394251	767	30	15	29	14.5	4		0	5.37047e-136
csn-miR169f_R-1_2ss20TC21GT	CL531.Contig2_All	nuclear transcription factor Y subunit A-3	3	1182-1202	Y	1055.39	803.028	up	0.394251	1193	30	15	29	14.5	4		0	5.37047e-136
	CL531.Contig3_All	nuclear transcription factor Y subunit A-3	3	756-776	Y	1055.39	803.028	up	0.394251	767	30	15	29	14.5	4		0	5.37047e-136
csn-miR169g-p3_2ss12CT18GC	Unigene10616_All	L-ascorbate oxidase-like	4	45-63	Y	70.3592	0	up	-	54	1	1			4		3.5063e-39	2.91538e-38
csn-miR169i_R+1	CL531.Contig2_All	nuclear transcription factor Y subunit A-3	3	1181-1202	Y	1055.39	803.028	up	0.394251	1193	30	15	29	14.5	4		0	5.37047e-136
	CL531.Contig3_All	nuclear transcription factor Y subunit A-3	3	755-776	Y	1055.39	803.028	up	0.394251	767	30	15	29	14.5	4		0	5.37047e-136
csn-miR169k_R-1_2ss18CT20GC	CL531.Contig2_All	nuclear transcription factor Y subunit A-3	2.5	1183-1202	Y	1055.39	803.028	up	0.394251	1193	30	15	29	14.5	4		0	5.37047e-136
	CL531.Contig3_All	nuclear transcription factor Y subunit A-3	2.5	757-776	Y	1055.39	803.028	up	0.394251	767	30	15	29	14.5	4	4	0	5.37047e-136
csn-miR169q_R-2	CL531.Contig2_All	nuclear transcription factor Y subunit A-3	4	1184-1202	Y	1055.39	803.028	up	0.394251	1193	30	15	29	14.5	2	4	0	5.37047e-136
	CL531.Contig3_All	nuclear transcription factor Y subunit A-3	4	758-776	Y	1055.39	803.028	up	0.394251	767	30	15	29	14.5	4		0	5.37047e-136
csn-miR169x	CL531.Contig2_All	nuclear transcription factor Y subunit A-3	2.5	1182-1202	Y	1055.39	803.028	up	0.394251	1193	30	15	29	14.5	4		0	5.37047e-136
	CL531.Contig3_All	nuclear transcription factor Y subunit A-3	2.5	756-776	Y	1055.39	803.028	up	0.394251	767	30	15	29	14.5	4		0	5.37047e-136
csn-miR171j-5p	Unigene2137_All	hypothetical protein	4	1159-1179	Y	281.437	276.906	up	0.0234129	1170	4	4	5	5	2		1.4249e-28	8.18458e-26
csn-miR172c	CL7513.Contig3_All	hypothetical protein	4	379-398	Y	281.437	0	up	-	390	4	4			2		0	2.06423e-151
	Unigene6404_All	hypothetical protein	3.5	488-508	Y	70.3592	0	up	-	499	1	1			2		3.5063e-39	2.91538e-38
	CL4694.Contig1_All	G-type lectin S-receptor-like serine/threonine-protein kinase CES101	3.5	2045-2065	Y	70.3592	0	up	-	2056	1	1			4		3.5063e-39	2.91538e-38
	CL13225.Contig3_All	G-type lectin S-receptor-like serine/threonine-protein kinase CES101	3	20-40	Y	70.3592	0	up	-	31	1	1			4		3.5063e-39	2.91538e-38
csn-miR172c-p3_1ss9TC	CL671.Contig5_All	hypothetical protein	0	2103-2123	Y	70.3592	0	up	-	2114	1	1			2		3.5063e-39	2.91538e-38
csn-miR172e-p3_1ss16CT	Unigene5176_All	homogentisate 1	4	1206-1225	Y	281.437	110.762	up	1.34534	1216	4	4	2	2	2		2.9693e-77	8.34695e-68
csn-miR172e-p5_1ss16CT	Unigene5176_All	homogentisate 1	4	1206-1225	Y	281.437	110.762	up	1.34534	1216	4	4	2	2	4		2.9693e-77	8.34695e-68
csn-miR172k_1ss5TA	CL7513.Contig3_All	hypothetical protein	3.5	379-399	Y	281.437	0	up	-	390	4	4			4		0	2.06423e-151
csn-miR390-p3_2ss17TA19GA	Unigene2464_All	cycloartenol-C-24-methyltransferase	1.5	208-228	Y	35.1796	0	up	-	219	1	0.5			4		2.0504e-20	1.70808e-19
csn-miR394a-5p_L+3	CL8802.Contig1_All	tryptophanyl-tRNA synthetase	4	920-943	Y	70.3592	0	up	-	934	1	1			4		3.5063e-39	2.91538e-38
csn-miR394b_1ss6AG	Unigene11185_All	protein translocase subunit SecA	3	2323-2341	Y	70.3592	55.3812	up	0.345341	2332	1	1	1	1	4	4	3.308e-11	5.66774e-10
csn-miR394b_L-1_1ss5CA	CL2469.Contig1_All	uncharacterized LOC101251741	4	1015-1034	Y	773.951	166.144	up	2.21981	1024	11	11	3	3	4	4	0	1.02804e-251
csn-miR395a	CL6037.Contig1_All	polygalacturonase-like	4	936-957	Y	457.335	27.6906	up	4.04578	948	13	6.5	1	0.5	4	4	0	1.34281e-204
csn-miR395a_L-1	Unigene18293_All	probable ADP-ribosylation factor GTPase-activating protein AGD5	3.5	1353-1371	Y	70.3592	55.3812	up	0.345341	1362	1	1	1	1	4		3.308e-11	5.66774e-10
csn-miR396a_R-3_1ss4AC	CL2270.Contig1_All	charged multivesicular body protein 1-like	4	1698-1714	Y	1125.75	830.719	up	0.43845	1705	16	16	15	15	4		0	1.08345e-150
	Unigene23108_All	U3 small nucleolar ribonucleoprotein protein IMP3	4	461-478	Y	140.718	0	up	-	469	2	2			2	4	1.4348e-76	2.46543e-76
	CL4055.Contig3_All	valosin-containing protein	4	2481-2499	Y	70.3592	0	up	-	2490	4	1			4		3.5063e-39	2.91538e-38
	CL4055.Contig2_All	valosin-containing protein	4	2522-2540	Y	70.3592	0	up	-	2531	4	1			2	2	3.5063e-39	2.91538e-38
	Unigene39165_All	26S protease regulatory subunit 7	4	2182-2200	Y	70.3592	0	up	-	2191	4	1			2	4	3.5063e-39	2.91538e-38
	CL5860.Contig1_All	4-hydroxy-3-methylbut-2-en-1-yl diphosphate synthase	3.5	2420-2437	Y	70.3592	0	up	-	2428	1	1			2	4	3.5063e-39	2.91538e-38
	CL3086.Contig5_All	hypothetical protein	4	2586-2604	Y	70.3592	0	up	-	2595	4	1			4	4	3.5063e-39	2.91538e-38
	CL12731.Contig2_All	hypothetical protein	3	327-344	Y	17.5898	0	up	-	335	1	0.25			2		5.8481e-11	2.22942e-10
	Unigene35611_All	DNA-methyltransferase family protein	3	925-942	Y	17.5898	0	up	-	933	1	0.25			2	3	5.8481e-11	2.22942e-10
	CL7906.Contig1_CKL	hypothetical protein	3	439-456	Y	17.5898	0	up	-	447	1	0.25			2	2	5.8481e-11	2.22942e-10
csn-miR396b	CL425.Contig5_All	UDP-glucosyl transferase 73C6	4	280-298	Y	281.437	0	up	-	289	4	4			2	2	0	2.06423e-151
	Unigene33040_EL	probable aminotransferase TAT2	4	2420-2438	Y	70.3592	0	up	-	2430	1	1			4		3.5063e-39	2.91538e-38
csn-miR396b_R+1_1	CL425.Contig5_All	UDP-glucosyl transferase 73C6	4	279-298	Y	281.437	0	up	-	289	4	4			4		0	2.06423e-151
csn-miR396b_R+1_2	Unigene32482_CKL	31 kDa ribonucleoprotein	3.5	603-622	Y	281.437	0	up	-	613	4	4			4		0	2.06423e-151
csn-miR396b-p3_2ss18AT19CT	CL3768.Contig1_All	eukaryotic translation initiation factor 3 subunit I	4	427-445	Y	281.437	0	up	-	436	4	4			4	4	0	2.06423e-151
	Unigene32482_CKL	31 kDa ribonucleoprotein	3.5	604-622	Y	281.437	0	up	-	613	4	4			2	2	0	2.06423e-151
	CL4239.Contig3_All	cytochrome P450 85A1	3.5	620-638	Y	175.898	55.3812	up	1.66727	629	3	2.5	1	1	4		1.0252e-55	2.10945e-49
	CL10163.Contig2_All	cysteine protease	3.5	492-510	Y	70.3592	0	up	-	501	1	1			4		3.5063e-39	2.91538e-38
	Unigene31213_All	catalase isozyme 1	4	3428-3445	Y	246.257	221.525	up	0.152696	3437	7	3.5	8	4	4		3.4349e-29	3.57015e-26
	CL2374.Contig3_All	catalase isozyme 1	4	780-797	Y	246.257	221.525	up	0.152696	789	7	3.5	8	4	4	4	3.4349e-29	3.57015e-26
csn-miR396b-p5_2ss18AT19CT	CL3768.Contig1_All	eukaryotic translation initiation factor 3 subunit I	4	427-445	Y	281.437	0	up	-	436	4	4			2		0	2.06423e-151
	Unigene32482_CKL	31 kDa ribonucleoprotein	3.5	604-622	Y	281.437	0	up	-	613	4	4			4	4	0	2.06423e-151
	CL4239.Contig3_All	cytochrome P450 85A1	3.5	620-638	Y	175.898	55.3812	up	1.66727	629	3	2.5	1	1	4	4	1.0252e-55	2.10945e-49
	CL10163.Contig2_All	cysteine protease	3.5	492-510	Y	70.3592	0	up	-	501	1	1			4	4	3.5063e-39	2.91538e-38
	Unigene31213_All	catalase isozyme 1	4	3428-3445	Y	246.257	221.525	up	0.152696	3437	7	3.5	8	4	4	4	3.4349e-29	3.57015e-26
	CL2374.Contig3_All	catalase isozyme 1	4	780-797	Y	246.257	221.525	up	0.152696	789	7	3.5	8	4	4	4	3.4349e-29	3.57015e-26
csn-miR396e-5p	CL5287.Contig1_All	U1 small nuclear ribonucleoprotein 70 kDa	4	306-325	Y	70.3592	0	up	-	317	1	1			2	2	3.5063e-39	2.91538e-38
csn-miR397a	CL1609.Contig10_All	L-ascorbate oxidase-like	2	753-773	Y	105.539	69.2266	up	0.608375	764	6	1.5	2	1.25	4	4	8.2956e-20	7.0242e-18
csn-miR397a_1ss10GC	CL1609.Contig10_All	L-ascorbate oxidase-like	4	753-773	Y	105.539	69.2266	up	0.608375	764	6	1.5	2	1.25	2	2	8.2956e-20	7.0242e-18
csn-miR397a_1ss2CA	CL7085.Contig1_EL	translation initiation factor eIF-2B subunit beta	3.5	1257-1277	Y	140.718	0	up	-	1268	2	2			2		1.4348e-76	2.46543e-76
	CL1609.Contig10_All	L-ascorbate oxidase-like	2	753-773	Y	105.539	69.2266	up	0.608375	764	6	1.5	2	1.25	4	4	8.2956e-20	7.0242e-18
csn-miR397-p3	CL1609.Contig10_All	L-ascorbate oxidase-like	0	750-770	Y	140.718	0	up	-	761	2	2			4	4	1.4348e-76	2.46543e-76
	CL3088.Contig2_All	importin subunit beta-1-like	4	4511-4530	Y	35.1796	0	up	-	4521	1	0.5			2	2	2.0504e-20	1.70808e-19
	CL3088.Contig1_All	importin subunit beta-1-like	4	4577-4596	Y	35.1796	0	up	-	4587	1	0.5			2		2.0504e-20	1.70808e-19
csn-miR397-p5	CL1609.Contig10_All	L-ascorbate oxidase-like	0	750-770	Y	140.718	0	up	-	761	2	2			2		1.4348e-76	2.46543e-76
	CL3088.Contig1_All	importin subunit beta-1-like	4	4577-4596	Y	35.1796	0	up	-	4587	1	0.5			4		2.0504e-20	1.70808e-19
	CL3088.Contig2_All	importin subunit beta-1-like	4	4511-4530	Y	35.1796	0	up	-	4521	1	0.5			2		2.0504e-20	1.70808e-19
csn-miR398_2ss9CT21GC	Unigene26199_All	probable isoleucine--tRNA ligase	4	2358-2377	Y	211.077	0	up	-	2369	3	3			2		0	7.14416e-114
csn-miR398a	CL3734.Contig2_All	putative cytochrome c oxidase subunit 5b-like	4	797-818	Y	70.3592	0	up	-	809	3	1			2		3.5063e-39	2.91538e-38
	CL8327.Contig1_All	putative cytochrome c oxidase subunit 5b-like	4	140-161	Y	70.3592	0	up	-	152	3	1			4		3.5063e-39	2.91538e-38
	CL8327.Contig3_All	putative cytochrome c oxidase subunit 6b-like	4	140-161	Y	70.3592	0	up	-	152	3	1			4		3.5063e-39	2.91538e-38
csn-miR398b	CL8327.Contig3_All	putative cytochrome c oxidase subunit 7b-like	4	140-161	Y	70.3592	0	up	-	152	3	1			2		3.5063e-39	2.91538e-38
	CL8327.Contig1_All	putative cytochrome c oxidase subunit 8b-like	4	140-161	Y	70.3592	0	up	-	152	3	1			4		3.5063e-39	2.91538e-38
	CL3734.Contig2_All	putative cytochrome c oxidase subunit 5b-like	4	797-818	Y	70.3592	0	up	-	809	3	1			4		3.5063e-39	2.91538e-38
csn-miR403d-p5_1ss14AG	CL2335.Contig1_All	coproporphyrinogen-III oxidase 1	4	396-416	Y	35.1796	0	up	-	407	1	0.5			4		2.0504e-20	1.70808e-19
csn-miR408_L-1R+1	CL8183.Contig2_All	L-ascorbate peroxidase	4	54-74	Y	105.539	55.3812	up	0.930303	65	3	1.5	2	1	2		2.1496e-24	6.47482e-22
csn-miR408-p3_2ss18GT19GT	CL8183.Contig2_All	L-ascorbate peroxidase	4	56-74	Y	105.539	55.3812	up	0.930303	65	3	1.5	2	1	2		2.1496e-24	6.47482e-22
csn-miR408-p5_2ss19GT20CT	CL7522.Contig2_All	Pathogenesis-related genes transcriptional activator PTI6	4	460-479	Y	422.155	0	up	-	470	6	6			2		0	4.96795e-227
	CL8183.Contig2_All	L-ascorbate peroxidase	3.5	55-74	Y	105.539	55.3812	up	0.930303	65	3	1.5	2	1	2		2.1496e-24	6.47482e-22
csn-miR477a_L+1_2ss2AT22AC	CL10706.Contig1_All	UMP-CMP kinase 3-like	4	579-599	Y	1110.67	249.216	up	2.15596	590	21	15.7857	6	4.5	2		0	0
	CL10706.Contig2_All	UMP-CMP kinase 3-like	4	389-409	Y	20.1026	0	up	-	400	2	0.285714			2		2.566e-12	1.88694e-11
csn-miR477g-p5	CL9285.Contig2_All	probable linoleate 9S-lipoxygenase 5	4	2661-2679	Y	140.718	0	up	-	2670	4	2			2		1.4348e-76	2.46543e-76
	CL2417.Contig1_All	proline iminopeptidase-like	4	2532-2549	Y	140.718	0	up	-	2540	2	2			4		1.4348e-76	2.46543e-76
	CL9285.Contig3_All	probable linoleate 9S-lipoxygenase 5	4	1408-1426	Y	140.718	0	up	-	1417	4	2			2	4	1.4348e-76	2.46543e-76
	CL3790.Contig3_All	molecular chaperone	4	961-979	Y	70.3592	0	up	-	970	1	1			2	4	3.5063e-39	2.91538e-38
	CL3059.Contig24_All	phenylalanine ammonia-lyase	4	2027-2044	Y	140.718	96.9172	up	0.537986	2035	8	2	7	1.75	2		1.5463e-24	4.95641e-22
	CL3059.Contig4_All	phenylalanine ammonia-lyase	4	1989-2006	Y	140.718	96.9172	up	0.537986	1997	8	2	7	1.75	2		1.5463e-24	4.95641e-22
	CL3059.Contig16_All	phenylalanine ammonia-lyase	4	2373-2390	Y	140.718	96.9172	up	0.537986	2381	8	2	7	1.75	0	0	1.5463e-24	4.95641e-22
	CL3059.Contig22_All	phenylalanine ammonia-lyase	4	1971-1988	Y	140.718	96.9172	up	0.537986	1979	8	2	7	1.75	2		1.5463e-24	4.95641e-22
csn-miR477g-p5_1ss1CT	CL3059.Contig24_All	phenylalanine ammonia-lyase	4	2027-2046	Y	334.206	110.762	up	1.59327	2037	19	4.75	8	2	1		0	3.82875e-89
	CL3059.Contig4_All	phenylalanine ammonia-lyase	4	1989-2008	Y	334.206	110.762	up	1.59327	1999	19	4.75	8	2	2	4	0	3.82875e-89
	CL3059.Contig22_All	phenylalanine ammonia-lyase	4	1971-1990	Y	334.206	110.762	up	1.59327	1981	19	4.75	8	2	2	4	0	3.82875e-89
	CL3059.Contig16_All	phenylalanine ammonia-lyase	4	2373-2392	Y	334.206	110.762	up	1.59327	2383	19	4.75	8	2	2	4	0	3.82875e-89
csn-miR477g-p5_2ss1CT22CT	CL3059.Contig16_All	phenylalanine ammonia-lyase	4	2372-2392	Y	334.206	110.762	up	1.59327	2383	19	4.75	8	2	2		0	3.82875e-89
	CL3059.Contig24_All	phenylalanine ammonia-lyase	4	2026-2046	Y	334.206	110.762	up	1.59327	2037	19	4.75	8	2	2	2	0	3.82875e-89
	CL3059.Contig22_All	phenylalanine ammonia-lyase	4	1970-1990	Y	334.206	110.762	up	1.59327	1981	19	4.75	8	2	2	2	0	3.82875e-89
	CL3059.Contig4_All	phenylalanine ammonia-lyase	4	1988-2008	Y	334.206	110.762	up	1.59327	1999	19	4.75	8	2	4		0	3.82875e-89
csn-miR482b-p5_2ss9TA19AC	Unigene9839_All	alpha-farnesene synthase-like	4	205-223	Y	211.077	0	up	-	214	3	3			4		0	7.14416e-114
	CL311.Contig2_EL	Nbs-lrr resistance protein	2	747-765	Y	70.3592	0	up	-	756	4	1			2	2	3.5063e-39	2.91538e-38
	Unigene5993_All	probable disease resistance RPP8-like protein 2	2	223-241	Y	70.3592	0	up	-	232	4	1			2	2	3.5063e-39	2.91538e-38
	CL11925.Contig2_All	Nbs-lrr resistance protein	2	734-752	Y	70.3592	0	up	-	743	4	1			4		3.5063e-39	2.91538e-38
	CL11925.Contig1_All	Nbs-lrr resistance protein	2	724-742	Y	70.3592	0	up	-	733	4	1			4		3.5063e-39	2.91538e-38
	CL5479.Contig1_All	systemin receptor SR160	4	443-460	Y	70.3592	0	up	-	451	1	1			4		3.5063e-39	2.91538e-38
csn-miR482d-p3_2ss13CT17CT	CL6794.Contig4_All	30S ribosomal protein 2	4	559-580	Y	1653.44	664.575	up	1.31497	571	47	23.5	24	12	2		0	0
	Unigene26831_All	calcium-dependent protein kinase 20-like	3.5	3-24	Y	70.3592	0	up	-	15	1	1			2		3.5063e-39	2.91538e-38
csn-miR482d-p5_2ss13CT17CT	CL6794.Contig4_All	30S ribosomal protein 2	4	559-580	Y	1653.44	664.575	up	1.31497	571	47	23.5	24	12	2	2	0	0
	Unigene26831_All	calcium-dependent protein kinase 20-like	3.5	3-24	Y	70.3592	0	up	-	15	1	1			2	2	3.5063e-39	2.91538e-38
csn-miR482-p3_2ss8CT18TA	CL7928.Contig1_All	uncharacterized LOC103455264	4	1645-1666	Y	70.3592	55.3812	up	0.345341	1657	1	1	1	1	4		3.308e-11	5.66774e-10
csn-miR482-p5_2ss16CT17TC	Unigene483_All	phytoene desaturase	3	971-992	Y	140.718	55.3812	up	1.34534	983	2	2	1	1	4		1.5959e-39	3.79447e-35
	CL7191.Contig1_All	probable low-specificity L-threonine aldolase 1	4	547-567	Y	70.3592	0	up	-	558	1	1			0	0	3.5063e-39	2.91538e-38
csn-miR530a_R-1_1ss8GA	CL5358.Contig1_All	Triacylglycerol lipase SDP1	4	2702-2720	Y	105.539	0	up	-	2711	3	1.5			4		6.8927e-58	1.44661e-57
	CL5358.Contig4_All	Triacylglycerol lipase SDP1	4	2505-2523	Y	105.539	0	up	-	2514	3	1.5			4		6.8927e-58	1.44661e-57
csn-miR535a_R-3	CL4782.Contig1_All	DNA-directed RNA polymerase III subunit rpc1	3	325-341	Y	140.718	0	up	-	332	2	2			0	0	1.4348e-76	2.46543e-76
	Unigene375_All	uncharacterized LOC103401427	4	1014-1032	Y	70.3592	0	up	-	1022	1	1			2		3.5063e-39	2.91538e-38
	Unigene11198_All	hypothetical protein	3.5	1280-1296	Y	70.3592	0	up	-	1288	1	1			1		3.5063e-39	2.91538e-38
csn-miR535b-p3_2ss15TC21AG	Unigene6260_All	replication factor C subunit 1	4	2404-2424	Y	140.718	110.762	up	0.345341	2415	2	2	2	2	2		6.6321e-21	7.33073e-19
csn-miR821b-p3_2ss15TG21AT	CL2047.Contig2_EL	DEAD-box ATP-dependent RNA helicase 42-like	4	1777-1798	Y	35.1796	0	up	-	1789	1	0.5			2		2.0504e-20	1.70808e-19
csn-miR821b-p5_2ss15TG21AT	CL2047.Contig2_EL	DEAD-box ATP-dependent RNA helicase 42-like	4	1777-1798	Y	35.1796	0	up	-	1789	1	0.5			2		2.0504e-20	1.70808e-19
csn-miR828a	CL10500.Contig1_All	r2r3-myb transcription factor	1	368-389	Y	26912.4	18552.7	up	0.53664	380	765	382.5	670	335	2		0	0
	CL10500.Contig2_All	hypothetical protein	1	108-129	Y	26912.4	18608.1	up	0.532339	120	765	382.5	671	336	4		0	0
csn-miR858a_L-1R+1	CL13603.Contig6_All	methionine S-methyltransferase-like	3.5	807-827	Y	445.608	415.359	up	0.101415	818	13	6.33333	15	7.5	2	2	1.4948e-48	4.1613e-44
	CL2837.Contig2_EL	hypothetical protein	4	368-387	Y	70.3592	0	up	-	378	1	1			2	2	3.5063e-39	2.91538e-38
csn-miR858b_R-3	Unigene21580_All	transcription factor MYB75-like	3	229-246	Y	140.718	0	up	-	237	2	2			2	2	1.4348e-76	2.46543e-76
	Unigene9120_All	hypothetical protein	3.5	186-203	Y	351.796	276.906	up	0.345341	194	10	5	10	5	2	2	9.2483e-50	1.41635e-44
	Unigene9121_All	hypothetical protein	3.5	272-289	Y	351.796	276.906	up	0.345341	280	10	5	10	5	2	2	9.2483e-50	1.41635e-44
	CL13603.Contig6_All	methionine S-methyltransferase-like	1	810-827	Y	445.608	415.359	up	0.101415	818	13	6.33333	15	7.5	2	2	1.4948e-48	4.1613e-44
	CL2837.Contig2_EL	hypothetical protein	3	370-387	Y	70.3592	0	up	-	378	1	1			2	2	3.5063e-39	2.91538e-38
	Unigene41272_All	hypothetical protein	3.5	309-326	Y	70.3592	0	up	-	317	1	1			2	2	3.5063e-39	2.91538e-38
csn-miR1427-p3_2ss16GA18AC	CL7935.Contig1_All	protein arginine N-methyltransferase 1.5	4	820-838	Y	70.3592	55.3812	up	0.345341	829	1	1	1	1	2	2	3.308e-11	5.66774e-10
csn-miR1427-p5_2ss16GA18AC	CL7935.Contig1_All	protein arginine N-methyltransferase 1.5	4	820-838	Y	70.3592	55.3812	up	0.345341	829	1	1	1	1	2	2	3.308e-11	5.66774e-10
csn-miR2111a-5p_R-1_1ss20TC	CL7473.Contig1_All	hypothetical protein	4	625-645	Y	70.3592	55.3812	up	0.345341	636	1	1	1	1	2	2	3.308e-11	5.66774e-10
csn-miR2118e-p3_2ss13TA19CT	CL2249.Contig4_All	beta-glucosidase 40-like	3	1879-1896	Y	70.3592	55.3812	up	0.345341	1887	1	1	1	1	2	2	3.308e-11	5.66774e-10
csn-miR2592ay-p3_2ss6AG17CG_1	CL2929.Contig2_All	uncharacterized LOC103696395	4	1117-1134	Y	35.1796	0	up	-	1125	1	0.5			2	2	2.0504e-20	1.70808e-19
csn-miR2592ay-p5_2ss6AG17CG_1	CL2929.Contig2_All	uncharacterized LOC103696395	4	1117-1134	Y	35.1796	0	up	-	1125	1	0.5			2		2.0504e-20	1.70808e-19
csn-miR2592bj-p3_1ss12TC	CL408.Contig1_All	actin-related protein 2/3 complex subunit 1A-like	4	757-774	Y	3166.16	166.144	up	4.25223	765	45	45	3	3	4		0	0
	CL2123.Contig4_All	ubiquitin receptor RAD23c-like	4	49-66	Y	70.3592	0	up	-	57	1	1			4		3.5063e-39	2.91538e-38
	Unigene24003_All	protein RRP45A-like	4	3078-3094	Y	70.3592	55.3812	up	0.345341	3086	2	1	2	1	4		3.308e-11	5.66774e-10
csn-miR2592bj-p3_2ss10TC17AT	CL2068.Contig3_All	pto-interacting protein 1	4	895-912	Y	140.718	0	up	-	903	2	2			2	4	1.4348e-76	2.46543e-76
csn-miR2592bj-p3_2ss12TC19AT_1	Unigene24003_All	protein RRP45A-like	4	3077-3094	Y	70.3592	55.3812	up	0.345341	3086	2	1	2	1	4	4	3.308e-11	5.66774e-10
csn-miR2629g-p3_2ss13TC18GA	Unigene1155_All	putative pentatricopeptide repeat-containing protein At5g59900	4	1802-1818	Y	211.077	55.3812	up	1.9303	1810	3	3	1	1	2	2	1.4969e-72	2.22347e-64
csn-miR3630-3p_L-2_1ss14CT	Unigene2685_All	transcription factor HY5	3.5	169-188	Y	70.3592	55.3812	up	0.345341	179	1	1	1	1	2	2	3.308e-11	5.66774e-10
csn-miR3630-3p_L-2_1ss22CT	Unigene2685_All	transcription factor HY5	4	169-188	Y	70.3592	55.3812	up	0.345341	179	1	1	1	1	0	2	3.308e-11	5.66774e-10
csn-miR3630-3p_L-3_1ss22CA	CL1517.Contig1_EL	actin	4	766-784	Y	246.257	0	up	-	775	7	3.5			4		0	1.21483e-132
csn-miR3630-3p_L-3_1ss22CT	Unigene8212_All	26S proteasome regulatory particle triple-A ATPase protein	4	97-114	Y	70.3592	0	up	-	105	1	1			2	2	3.5063e-39	2.91538e-38
	Unigene17709_All	probable linoleate 9S-lipoxygenase 4	4	813-831	Y	10.0513	0	up	-	822	1	0.142857			2	2	7.4407e-07	4.34403e-06
	CL222.Contig1_All	probable linoleate 9S-lipoxygenase 4	4	1828-1846	Y	10.0513	0	up	-	1837	1	0.142857			3	2	7.4407e-07	4.34403e-06
csn-miR3633a-3p_R-3_1ss7TA	CL2836.Contig3_All	lectin-domain containing receptor kinase VI.3-like	3	1540-1557	Y	70.3592	0	up	-	1548	2	1			2		3.5063e-39	2.91538e-38
	CL2836.Contig4_All	lectin-domain containing receptor kinase VI.3-like	3	1626-1643	Y	70.3592	0	up	-	1634	2	1			4	4	3.5063e-39	2.91538e-38
	CL4715.Contig5_All	uncharacterized LOC106769139	4	2900-2917	Y	35.1796	0	up	-	2908	1	0.5			4		2.0504e-20	1.70808e-19
csn-miR4995_L+1R-4	Unigene19994_All	uncharacterized LOC105166581	3	598-614	Y	386.975	138.453	up	1.48284	606	11	5.5	5	2.5	4		0	7.39702e-99
	CL10155.Contig2_All	inner membrane protein PPF-1	3.5	1226-1243	Y	281.437	221.525	up	0.345341	1234	4	4	4	4	2		3.6965e-40	1.15459e-35
	Unigene24397_All	beta-glucosidase 40-like	3.5	1154-1171	Y	70.3592	0	up	-	1162	1	1			2	3	3.5063e-39	2.91538e-38
csn-miR5048a_L+2R-2	CL4024.Contig1_All	3-phosphoinositide-dependent protein kinase 2-like	3.5	1471-1492	Y	211.077	0	up	-	1483	3	3			4		0	7.14416e-114
csn-miR5072_L-4_1ss12CT	Unigene30073_All	cationic peroxidase 1-like	4	356-373	Y	70.3592	0	up	-	364	1	1			4		3.5063e-39	2.91538e-38
csn-miR5083_L-1	Unigene12643_All	hypothetical protein	4	730-747	Y	70.3592	0	up	-	738	1	1			2	2	3.5063e-39	2.91538e-38
csn-miR5083-p5_1ss19CA	CL4261.Contig1_All	hypothetical protein	2.5	979-997	Y	105.539	27.6906	up	1.9303	988	3	1.5	1	0.5	2	2	3.6347e-37	6.09585e-33
csn-miR5175-p5_1ss4CT	CL7308.Contig3_All	6-phosphogluconate dehydrogenase	4	900-919	Y	211.077	55.3812	up	1.9303	910	3	3	1	1	2	2	1.4969e-72	2.22347e-64
csn-miR5267c-p3_2ss2AT17AG	Unigene22473_CKL	photosystem II 44 kDa protein	4	3141-3158	Y	140.718	0	up	-	3149	2	2			2		1.4348e-76	2.46543e-76
csn-miR5303j-p5_2ss10GT17CT	CL8094.Contig4_All	hypothetical protein	4	859-877	Y	70.3592	0	up	-	868	2	1			2		3.5063e-39	2.91538e-38
	Unigene22168_All	cellulose synthase-like protein D5	4	491-508	Y	70.3592	55.3812	up	0.345341	499	1	1	1	1	2	2	3.308e-11	5.66774e-10
csn-miR5368_L-2R+1	CL6027.Contig2_All	mitogen-activated protein kinase kinase 2-like	4	1235-1252	Y	70.3592	55.3812	up	0.345341	1243	1	1	1	1	2		3.308e-11	5.66774e-10
csn-miR5368-p3	CL786.Contig2_All	hypothetical protein	3.5	1848-1864	Y	20.1026	7.91161	up	1.34534	1855	2	0.285714	1	0.142857	4	4	6.6278e-07	4.41901e-06
	CL786.Contig7_All	hypothetical protein	3.5	1816-1832	Y	20.1026	7.91161	up	1.34534	1823	2	0.285714	1	0.142857	2	2	6.6278e-07	4.41901e-06
	Unigene13266_All	hypothetical protein	3.5	1834-1850	Y	20.1026	7.91161	up	1.34534	1841	2	0.285714	1	0.142857	2	2	6.6278e-07	4.41901e-06
	CL786.Contig4_All	hypothetical protein	3.5	1816-1832	Y	20.1026	7.91161	up	1.34534	1823	2	0.285714	1	0.142857	2	4	6.6278e-07	4.41901e-06
csn-miR5368-p3_1ss5AT	CL7163.Contig3_All	S12-like	0	2393-2413	Y	87.949	83.0719	up	0.0823065	2404	5	1.25	6	1.5	2		1.2729e-10	1.02729e-09
csn-miR5368-p3_2ss14TC17CT	CL2469.Contig1_All	uncharacterized LOC101251741	4	656-673	Y	211.077	0	up	-	664	3	3			2		0	7.14416e-114
	CL9953.Contig1_All	NAC domain-containing protein 89-like	3	282-299	Y	70.3592	0	up	-	290	1	1			4		3.5063e-39	2.91538e-38
	CL1184.Contig7_All	DNA repair protein rhp26	3	2206-2223	Y	17.5898	0	up	-	2214	1	0.25			4	4	5.8481e-11	2.22942e-10
	CL1184.Contig3_All	hypothetical protein	3	2058-2075	Y	17.5898	0	up	-	2066	1	0.25			4	4	5.8481e-11	2.22942e-10
csn-miR5368-p5_1ss4TC	Unigene9468_All	luminal-binding protein 5-like	3.5	657-676	Y	70.3592	0	up	-	667	1	1			2		3.5063e-39	2.91538e-38
csn-miR5368-p5_1ss6TC_1	Unigene9468_All	luminal-binding protein 5-like	4	658-678	Y	70.3592	0	up	-	669	1	1			2		3.5063e-39	2.91538e-38
csn-miR5368-p5_1ss6TC_2	Unigene9468_All	luminal-binding protein 5-like	4	657-678	Y	70.3592	0	up	-	669	1	1			2		3.5063e-39	2.91538e-38
csn-miR5368-p5_1ss7TC	CL5200.Contig4_All	cell division cycle 20.2	3.5	2954-2971	Y	35.1796	0	up	-	2962	1	0.5			2		2.0504e-20	1.70808e-19
	CL8502.Contig2_All	cell division cycle 20.2	3.5	809-826	Y	35.1796	0	up	-	817	1	0.5			3		2.0504e-20	1.70808e-19
csn-miR5368-p5_2ss15TC18CT	Unigene8246_All	hypothetical protein	4	2454-2471	Y	422.155	0	up	-	2462	6	6			2		0	4.96795e-227
	CL7357.Contig2_All	hypothetical protein	3.5	85-102	Y	140.718	0	up	-	93	2	2			4		1.4348e-76	2.46543e-76
	CL2469.Contig1_All	uncharacterized LOC101251741	4	657-674	Y	70.3592	0	up	-	665	1	1			4	4	3.5063e-39	2.91538e-38
	Unigene5154_All	1-deoxy-D-xylulose 5-phosphate reductoisomerase	3.5	418-435	Y	70.3592	0	up	-	426	1	1			4	4	3.5063e-39	2.91538e-38
csn-miR6149a_L-2R-1_1ss3GC	CL4219.Contig6_CKL	UBP1-associated protein 2C	4	465-482	Y	46.9061	0	up	-	473	2	0.666667			2	4	1.1074e-26	6.27865e-26
	CL3670.Contig2_All	uncharacterized LOC105166581	4	1240-1257	Y	46.9061	0	up	-	1248	2	0.666667			2	4	1.1074e-26	6.27865e-26
	CL4219.Contig5_CKL	UBP1-associated protein 2C	4	465-482	Y	46.9061	0	up	-	473	2	0.666667			2	2	1.1074e-26	6.27865e-26
	CL38.Contig11_All	crocetin glucoside glucosyltransferase-like	4	240-257	Y	17.5898	0	up	-	248	1	0.25			2	2	5.8481e-11	2.22942e-10
csn-miR6173-p3_1ss18AG	CL5521.Contig8_All	ABSCISIC ACID-INSENSITIVE 5-like protein 7	4	1302-1320	Y	23.4531	0	up	-	1311	2	0.333333			2	2	4.0156e-14	4.64637e-13
	CL1859.Contig1_EL	ABSCISIC ACID-INSENSITIVE 5-like protein 7	4	993-1011	Y	23.4531	0	up	-	1002	2	0.333333			2	2	4.0156e-14	4.64637e-13
	CL4510.Contig5_All	ABSCISIC ACID-INSENSITIVE 5-like protein 7	4	1191-1209	Y	23.4531	0	up	-	1200	2	0.333333			2		4.0156e-14	4.64637e-13
csn-miR6173-p5_2	CL5735.Contig2_All	phosphoinositide phospholipase C 6	4	1310-1327	Y	70.3592	27.6906	up	1.34534	1318	2	1	1	0.5	3		1.3812e-20	5.91379e-18
	CL5735.Contig3_All	PI-phospholipase C PLC5	4	1356-1373	Y	70.3592	27.6906	up	1.34534	1364	2	1	1	0.5	2		1.3812e-20	5.91379e-18
csn-miR6173-p5_3	CL5735.Contig2_All	phosphoinositide phospholipase C 6	4	1310-1329	Y	175.898	0	up	-	1320	5	2.5			2		0	4.19821e-95
	CL5735.Contig3_All	PI-phospholipase C PLC5	4	1356-1375	Y	175.898	0	up	-	1366	5	2.5			2		0	4.19821e-95
csn-miR6300_R+1	CL3501.Contig3_All	abscisate beta-glucosyltransferase-like	4	484-501	Y	140.718	55.3812	up	1.34534	493	2	2	1	1	2	4	1.5959e-39	3.79447e-35
csn-miR6300-p3_1ss10AG	Unigene21580_All	transcription factor MYB75-like	4	75-92	Y	70.3592	0	up	-	83	1	1			2	4	3.5063e-39	2.91538e-38
csn-miR7757-5p_1ss2TC	Unigene40378_CKL	protein disulfide isomerase-like 1-2	4	1020-1041	Y	70.3592	0	up	-	1032	1	1			4		3.5063e-39	2.91538e-38
csn-miR7771-p5_2ss9GA18TA	Unigene9336_All	UBX domain-containing protein 6	3.5	205-222	Y	70.3592	55.3812	up	0.345341	213	1	1	1	1	2		3.308e-11	5.66774e-10
csn-miR7972_1ss9CG	CL5731.Contig1_All	elongation factor 1-alpha	3	676-695	Y	140.718	0	up	-	686	2	2			4		1.4348e-76	2.46543e-76
	CL13379.Contig7_All	elongation factor 1-alpha-like	4	683-703	Y	35.1796	27.6906	up	0.345341	694	1	0.5	1	0.5	4		2.7372e-06	1.81207e-05
	CL5731.Contig2_All	elongation factor 1-alpha-like	4	214-234	Y	35.1796	27.6906	up	0.345341	225	1	0.5	1	0.5	2		2.7372e-06	1.81207e-05
csn-miR8005a-p5_1ss11AG	CL5371.Contig3_All	small nuclear ribonucleoprotein Sm D2	3.5	94-113	Y	35.1796	27.6906	up	0.345341	105	1	0.5	1	0.5	2		2.7372e-06	1.81207e-05
	Unigene1986_All	small nuclear ribonucleoprotein Sm D2	3.5	113-132	Y	35.1796	27.6906	up	0.345341	124	1	0.5	1	0.5	4		2.7372e-06	1.81207e-05
	CL5005.Contig3_All	peroxidase 12-like	4	684-701	Y	211.077	0	up	-	692	3	3			4		0	7.14416e-114
	CL3541.Contig3_All	splicing factor U2af large subunit B	4	1440-1458	Y	14.0718	11.0762	up	0.345341	1449	1	0.2	1	0.2	4		0.0030174	0.00650188
	CL3541.Contig2_All	splicing factor U2af large subunit B	4	1440-1458	Y	14.0718	11.0762	up	0.345341	1449	1	0.2	1	0.2	2	4	0.0030174	0.00650188
	CL5846.Contig1_EL	splicing factor U2af large subunit B	4	1330-1348	Y	14.0718	11.0762	up	0.345341	1339	1	0.2	1	0.2	2	4	0.0030174	0.00650188
	CL3541.Contig6_All	splicing factor U2af large subunit B	4	1305-1323	Y	14.0718	11.0762	up	0.345341	1314	1	0.2	1	0.2	2	2	0.0030174	0.00650188
	Unigene15927_All	splicing factor U2af large subunit B	4	1197-1215	Y	14.0718	11.0762	up	0.345341	1206	1	0.2	1	0.2	2	4	0.0030174	0.00650188
csn-miR8757b-p5_1ss18GC	CL2566.Contig2_All	L-aminoadipate-semialdehyde dehydrogenase-phosphopantetheinyl transferase-like	4	757-774	Y	70.3592	55.3812	up	0.345341	765	2	1	2	1	2	2	3.308e-11	5.66774e-10
csn-miR8757b-p5_1ss1TG	CL2285.Contig1_All	allene oxide cyclase 4	3.5	364-381	Y	23.4531	18.4604	up	0.345341	372	1	0.333333	1	0.333333	4	4	0.00012864	0.000391816
csn-miR8757b-p5_2ss1TG19GC	CL2285.Contig1_All	allene oxide cyclase 4	3.5	362-381	Y	23.4531	18.4604	up	0.345341	372	1	0.333333	1	0.333333	4	4	0.00012864	0.000391816
csn-miR156a_R+1	Unigene35969_All	uncharacterized LOC103401427	1	962-982	Y	351.796	1993.72	down	-2.50266	973	5	5	36	36		4	4.437e-51	1.4501e-57
	CL5502.Contig1_All	uncharacterized LOC103401427	3.5	689-709	Y	0	498.431	down	-	700			9	9	2	0	2.1424e-46	9.51995e-75
	Unigene9985_All	uncharacterized LOC103401427	3	927-947	Y	1336.82	2436.77	down	-0.866163	938	19	19	44	44	2	0	1.0452e-17	4.27471e-17
	Unigene34172_All	hypothetical protein	2	13-33	Y	0	110.762	down	-	24			2	2	2	0	1.5681e-11	3.83444e-17
	CL3911.Contig4_All	uncharacterized LOC103401427	2	601-621	Y	140.718	595.348	down	-2.08092	612	4	2	22	10.75	2	0	2.5333e-09	7.53589e-10
	CL5803.Contig3_All	uncharacterized LOC103401427	2	1398-1418	Y	140.718	595.348	down	-2.08092	1409	4	2	22	10.75		4	2.5333e-09	7.53589e-10
csn-miR156a-p3_1ss10TA	Unigene31494_All	LRR receptor-like serine/threonine-protein kinase FLS2-like	4	621-640	Y	0	110.762	down	-	632			2	2	4	2	1.5681e-11	3.83444e-17
csn-miR156b-5p_R+1	Unigene35969_All	uncharacterized LOC103401427	1	962-982	Y	351.796	1993.72	down	-2.50266	973	5	5	36	36		2	4.437e-51	1.4501e-57
	CL5502.Contig1_All	uncharacterized LOC103401427	3.5	689-709	Y	0	498.431	down	-	700			9	9		2	2.1424e-46	9.51995e-75
	Unigene9985_All	uncharacterized LOC103401427	3	927-947	Y	1336.82	2436.77	down	-0.866163	938	19	19	44	44	2	2	1.0452e-17	4.27471e-17
	Unigene34172_All	hypothetical protein	2	13-33	Y	0	110.762	down	-	24			2	2		2	1.5681e-11	3.83444e-17
	CL3911.Contig4_All	uncharacterized LOC103401427	2	601-621	Y	140.718	595.348	down	-2.08092	612	4	2	22	10.75		4	2.5333e-09	7.53589e-10
	CL5803.Contig3_All	uncharacterized LOC103401427	2	1398-1418	Y	140.718	595.348	down	-2.08092	1409	4	2	22	10.75		2	2.5333e-09	7.53589e-10
csn-miR156c-p3_1ss5AG	CL609.Contig3_All	protein FIZZY-RELATED 2	4	856-874	Y	0	110.762	down	-	865			2	2		4	1.5681e-11	3.83444e-17
	CL5554.Contig1_All	chlorophyll A/B binding protein	3.5	753-772	Y	70.3592	387.669	down	-2.46201	763	1	1	7	7		2	9.7476e-11	6.99534e-12
csn-miR156f	Unigene9985_All	uncharacterized LOC103401427	3.5	928-948	Y	0	276.906	down	-	939			5	5		2	1.5763e-26	5.5146e-42
	Unigene27464_All	uncharacterized LOC103401427	1	563-583	Y	0	55.3812	down	-	574			1	1		0	1.8709e-06	1.14201e-08
	Unigene35969_All	uncharacterized LOC103401427	3	963-983	Y	70.3592	276.906	down	-1.97659	974	1	1	5	5		2	0.00029016	0.000187353
csn-miR156f_1ss12TA	Unigene9985_All	uncharacterized LOC103401427	3.5	928-948	Y	0	276.906	down	-	939			5	5		4	1.5763e-26	5.5146e-42
	Unigene27464_All	uncharacterized LOC103401427	3	563-583	Y	0	55.3812	down	-	574			1	1		2	1.8709e-06	1.14201e-08
	Unigene35969_All	uncharacterized LOC103401427	3	963-983	Y	70.3592	276.906	down	-1.97659	974	1	1	5	5		2	0.00029016	0.000187353
csn-miR156f-p3	Unigene23385_All	serine/threonine-protein kinase CDL1-like	4	242-264	Y	70.3592	609.194	down	-3.11409	254	1	1	11	11		4	5.5326e-27	3.24664e-32
csn-miR156h_L+1	Unigene9985_All	uncharacterized LOC103401427	3.5	928-948	Y	0	276.906	down	-	939			5	5		1	1.5763e-26	5.5146e-42
	Unigene27464_All	uncharacterized LOC103401427	3	563-583	Y	0	55.3812	down	-	574			1	1		2	1.8709e-06	1.14201e-08
	Unigene35969_All	uncharacterized LOC103401427	3	963-983	Y	70.3592	276.906	down	-1.97659	974	1	1	5	5	2	0	0.00029016	0.000187353
csn-miR156h-3p_2ss6TC9TG	Unigene6580_All	ABSCISIC ACID-INSENSITIVE 5-like protein 1	4	992-1011	Y	0	110.762	down	-	1002			2	2	2	0	1.5681e-11	3.83444e-17
csn-miR156t	Unigene9985_All	uncharacterized LOC103401427	1.5	928-948	Y	0	276.906	down	-	939			5	5	2	0	1.5763e-26	5.5146e-42
	Unigene6402_All	uncharacterized protein LOC103984394	4	39-58	Y	0	276.906	down	-	49			5	5	2	0	1.5763e-26	5.5146e-42
	Unigene35969_All	uncharacterized LOC103401427	1	963-983	Y	70.3592	276.906	down	-1.97659	974	1	1	5	5		4	0.00029016	0.000187353
csn-miR159	Unigene24446_All	WAS/WASL-interacting protein family member 1-like	1.5	166-186	Y	93.8122	1698.36	down	-4.17822	177	4	1.33333	92	30.6667	4	2	0	9.86907e-146
csn-miR159a-5p_L-1R-1	CL4047.Contig3_All	elongation factor 1-alpha	2	1774-1793	Y	0	110.762	down	-	1784			2	2		2	1.5681e-11	3.83444e-17
	CL8993.Contig1_CKL	malate dehydrogenase	4	494-513	Y	0	110.762	down	-	503			2	2		2	1.5681e-11	3.83444e-17
csn-miR159a-p3_2ss9AT18TG	CL12990.Contig3_All	ARF-GAP domain 7 isoform 1	4	1405-1423	Y	0	55.3812	down	-	1414			1	1	2	2	1.8709e-06	1.14201e-08
csn-miR159b-p5_2ss11CA18TG	Unigene27551_All	DNA-3-methyladenine glycosylase	3.5	359-376	Y	0	27.6906	down	-	367			2	0.5		4	0.0007498	9.0674e-05
csn-miR159c	Unigene24446_All	WAS/WASL-interacting protein family member 1-like	3.5	166-186	Y	93.8122	1698.36	down	-4.17822	177	4	1.33333	92	30.6667		2	0	9.86907e-146
csn-miR159c_1ss20TC	Unigene24446_All	WAS/WASL-interacting protein family member 1-like	3	166-186	Y	93.8122	1698.36	down	-4.17822	177	4	1.33333	92	30.6667		2	0	9.86907e-146
	CL733.Contig1_All	anthocyanidin reductase	4	807-827	Y	70.3592	332.287	down	-2.23962	818	1	1	6	6	2	2	2.8444e-07	8.27196e-08
csn-miR159c_R-1	Unigene24446_All	WAS/WASL-interacting protein family member 1-like	3.5	167-186	Y	93.8122	1698.36	down	-4.17822	177	4	1.33333	92	30.6667	4	2	0	9.86907e-146
	Unigene42034_CKL	UDP-glycosyltransferase 85A1	3.5	236-256	Y	0	55.3812	down	-	247			1	1		2	1.8709e-06	1.14201e-08
csn-miR159c_R-1_1ss19CT	Unigene24446_All	WAS/WASL-interacting protein family member 1-like	4	167-186	Y	93.8122	1698.36	down	-4.17822	177	4	1.33333	92	30.6667		4	0	9.86907e-146
	Unigene42034_CKL	UDP-glycosyltransferase 85A1	4	237-256	Y	0	55.3812	down	-	247			1	1		4	1.8709e-06	1.14201e-08
csn-miR159c_R-1_1ss3TG	CL9028.Contig3_All	Glutamyl-tRNA(Gln) amidotransferase subunit A	4	1103-1121	Y	0	166.144	down	-	1113			3	3	0	0	1.4986e-16	2.32356e-25
	CL8874.Contig2_All	putative pentatricopeptide repeat-containing protein At5g59900	4	407-426	Y	140.718	166.144	down	-0.239622	417	2	2	3	3	0	0	1.0071e-10	4.73549e-10
csn-miR159c_R-1_1ss6AC	Unigene24446_All	WAS/WASL-interacting protein family member 1-like	3.5	167-186	Y	93.8122	1698.36	down	-4.17822	177	4	1.33333	92	30.6667	0	0	0	9.86907e-146
csn-miR159c-p3_2ss11CA18TG	Unigene27551_All	DNA-3-methyladenine glycosylase	3.5	359-376	Y	0	27.6906	down	-	367			2	0.5	2	0	0.0007498	9.0674e-05
csn-miR159c-p5_2ss13GT19CA	Unigene42034_CKL	UDP-glycosyltransferase 85A1	4	237-256	Y	0	55.3812	down	-	247			1	1	0	0	1.8709e-06	1.14201e-08
	CL3874.Contig8_All	26S proteasome non-ATPase regulatory subunit 13 homolog B	4	40-58	Y	0	18.4604	down	-	49			1	0.333333	0	0	0.0059205	0.00311168
	CL1462.Contig1_All	26S proteasome non-ATPase regulatory subunit 13 homolog B	4	60-78	Y	0	18.4604	down	-	69			1	0.333333	0	0	0.0059205	0.00311168
csn-miR160a	CL3788.Contig1_All	auxin response factor 15-like isoform X1	1	1224-1244	Y	2779.19	10688.6	down	-1.94334	1235	79	39.5	386	193	0	0	0	6.15633e-111
	Unigene26726_All	auxin response factor 5-like	1	623-643	Y	2779.19	10688.6	down	-1.94334	634	79	39.5	386	193		4	0	6.15633e-111
	Unigene27869_All	auxin response factor 5-like	0.5	455-475	Y	70.3592	609.194	down	-3.11409	466	1	1	11	11	2	0	5.5326e-27	3.24664e-32
	CL3788.Contig2_All	auxin response factor 7-like	1	1554-1574	Y	398.702	1495.29	down	-1.90705	1565	17	5.66667	81	27		0	1.2797e-14	2.41199e-15
	CL7735.Contig3_All	auxin response factor 3	1	1332-1352	Y	398.702	1495.29	down	-1.90705	1343	17	5.66667	81	27		4	1.2797e-14	2.41199e-15
	CL7735.Contig4_All	auxin response factor 1	1	1051-1071	Y	398.702	1495.29	down	-1.90705	1062	17	5.66667	81	27		4	1.2797e-14	2.41199e-15
	Unigene3639_All	auxin response factor 3	0.5	1513-1533	Y	4010.47	11242.4	down	-1.4871	1524	57	57	203	203		4	2.3866e-14	1.34907e-14
csn-miR160a_L+1	Unigene3639_All	auxin response factor 3	1.5	1513-1534	Y	0	110.762	down	-	1525			2	2		2	1.5681e-11	3.83444e-17
	Unigene26726_All	auxin response factor 5-like	2	623-644	Y	35.1796	83.0719	down	-1.23962	635	1	0.5	3	1.5		2	0.87507	0.91931
	CL3788.Contig1_All	auxin response factor 15-like isoform X1	2	1224-1245	Y	35.1796	83.0719	down	-1.23962	1236	1	0.5	3	1.5		2	0.87507	0.91931
csn-miR160a_L+2	Unigene3639_All	auxin response factor 3	3	1513-1535	Y	0	55.3812	down	-	1526			1	1		2	1.8709e-06	1.14201e-08
csn-miR160a-3p	CL19.Contig7_All	hypothetical protein	4	1502-1522	Y	0	13.8453	down	-	1513			1	0.25	2	0	0.017152	0.0147607
	CL13567.Contig4_All	hypothetical protein	4	1425-1445	Y	0	13.8453	down	-	1436			1	0.25	0	0	0.017152	0.0147607
	Unigene39802_All	hypothetical protein	4	1307-1327	Y	0	13.8453	down	-	1318			1	0.25	0	0	0.017152	0.0147607
	Unigene39794_All	probable disease resistance protein At4g27220	4	103-123	Y	0	13.8453	down	-	114			1	0.25	0	0	0.017152	0.0147607
csn-miR160b	CL3788.Contig1_All	auxin response factor 15-like isoform X1	2	1224-1244	Y	2779.19	10688.6	down	-1.94334	1235	79	39.5	386	193	0	0	0	6.15633e-111
	Unigene26726_All	auxin response factor 5-like	2	623-643	Y	2779.19	10688.6	down	-1.94334	634	79	39.5	386	193	0	0	0	6.15633e-111
	Unigene27869_All	auxin response factor 5-like	1.5	455-475	Y	70.3592	609.194	down	-3.11409	466	1	1	11	11	0	0	5.5326e-27	3.24664e-32
	CL3788.Contig2_All	auxin response factor 7-like	2	1554-1574	Y	398.702	1495.29	down	-1.90705	1565	17	5.66667	81	27	0	0	1.2797e-14	2.41199e-15
	CL7735.Contig3_All	auxin response factor 3	2	1332-1352	Y	398.702	1495.29	down	-1.90705	1343	17	5.66667	81	27	2	0	1.2797e-14	2.41199e-15
	CL7735.Contig4_All	auxin response factor 1	2	1051-1071	Y	398.702	1495.29	down	-1.90705	1062	17	5.66667	81	27	0	0	1.2797e-14	2.41199e-15
	Unigene3639_All	auxin response factor 3	1.5	1513-1533	Y	4010.47	11242.4	down	-1.4871	1524	57	57	203	203	0	0	2.3866e-14	1.34907e-14
csn-miR160b-3p_1ss16TA	Unigene39802_All	hypothetical protein	4	1307-1327	Y	0	13.8453	down	-	1318			1	0.25	0	2	0.017152	0.0147607
	Unigene39794_All	probable disease resistance protein At4g27220	4	103-123	Y	0	13.8453	down	-	114			1	0.25	0	2	0.017152	0.0147607
	CL13567.Contig4_All	hypothetical protein	4	1425-1445	Y	0	13.8453	down	-	1436			1	0.25	2	2	0.017152	0.0147607
	CL19.Contig7_All	hypothetical protein	4	1502-1522	Y	0	13.8453	down	-	1513			1	0.25	0	0	0.017152	0.0147607
csn-miR160b-p5_2ss12CT17CG	Unigene21729_All	hypothetical protein	4	2745-2763	Y	0	55.3812	down	-	2754			1	1	0	0	1.8709e-06	1.14201e-08
	Unigene5014_All	nuclear pore complex protein NUP205	4	61-78	Y	0	55.3812	down	-	69			1	1	0	0	1.8709e-06	1.14201e-08
csn-miR160c	Unigene26726_All	auxin response factor 5-like	1	623-643	Y	2779.19	10688.6	down	-1.94334	634	79	39.5	386	193	0	0	0	6.15633e-111
	CL3788.Contig1_All	auxin response factor 15-like isoform X1	1	1224-1244	Y	2779.19	10688.6	down	-1.94334	1235	79	39.5	386	193	0	0	0	6.15633e-111
	Unigene27869_All	auxin response factor 5-like	0.5	455-475	Y	70.3592	609.194	down	-3.11409	466	1	1	11	11	0	0	5.5326e-27	3.24664e-32
	CL3788.Contig2_All	auxin response factor 7-like	1	1554-1574	Y	398.702	1495.29	down	-1.90705	1565	17	5.66667	81	27	0	0	1.2797e-14	2.41199e-15
	CL7735.Contig3_All	auxin response factor 3	1	1332-1352	Y	398.702	1495.29	down	-1.90705	1343	17	5.66667	81	27	2	0	1.2797e-14	2.41199e-15
	CL7735.Contig4_All	auxin response factor 1	1	1051-1071	Y	398.702	1495.29	down	-1.90705	1062	17	5.66667	81	27	0	0	1.2797e-14	2.41199e-15
	Unigene3639_All	auxin response factor 3	1	1513-1533	Y	4010.47	11242.4	down	-1.4871	1524	57	57	203	203	0	0	2.3866e-14	1.34907e-14
csn-miR160c_L+2	Unigene3639_All	auxin response factor 3	3	1513-1535	Y	0	55.3812	down	-	1526			1	1	0	2	1.8709e-06	1.14201e-08
csn-miR160c-p5_2ss13AG17AG	Unigene17717_All	regulator of nonsense transcripts UPF3	4	58-75	Y	0	55.3812	down	-	66			1	1	2	2	1.8709e-06	1.14201e-08
	CL1371.Contig2_All	putative 3	4	681-697	Y	0	11.0762	down	-	688			1	0.2		2	0.033023	0.0409641
csn-miR162a_R+1	CL11508.Contig2_All	ribonuclease III	2.5	1014-1036	Y	211.077	2769.06	down	-3.71355	1026	3	3	50	50		2	0	9.50821e-198
csn-miR162_1ss20AG	CL11508.Contig2_All	ribonuclease III	2.5	1015-1036	Y	211.077	2769.06	down	-3.71355	1026	3	3	50	50		4	0	9.50821e-198
	CL1245.Contig4_All	peroxisome biogenesis protein 1	4	1139-1158	Y	70.3592	609.194	down	-3.11409	1150	1	1	11	11		4	5.5326e-27	3.24664e-32
csn-miR162_R+1	CL11508.Contig2_All	ribonuclease III	2.5	1014-1036	Y	211.077	2769.06	down	-3.71355	1026	3	3	50	50		2	0	9.50821e-198
	CL1245.Contig4_All	peroxisome biogenesis protein 1	4	1138-1158	Y	70.3592	609.194	down	-3.11409	1150	1	1	11	11		2	5.5326e-27	3.24664e-32
	CL1245.Contig4_All	peroxisome biogenesis protein 1	4	1138-1158	Y	70.3592	609.194	down	-3.11409	1150	1	1	11	11	2	2	5.5326e-27	3.24664e-32
csn-miR162a-3p	CL11508.Contig2_All	ribonuclease III	2	1015-1036	Y	211.077	2769.06	down	-3.71355	1026	3	3	50	50		4	0	9.50821e-198
	CL1245.Contig4_All	peroxisome biogenesis protein 1	4	1139-1158	Y	70.3592	609.194	down	-3.11409	1150	1	1	11	11		4	5.5326e-27	3.24664e-32
csn-miR164a_1ss13GT	Unigene18223_All	NAC domain-containing protein 89-like	1.5	849-869	Y	3940.11	4430.5	down	-0.169232	860	56	56	80	80	0	0	0	1.02701e-263
csn-miR164a_L+1_1	CL2400.Contig2_All	NAC domain-containing protein 89-like	2	1391-1412	Y	0	110.762	down	-	1403			2	2	0	0	1.5681e-11	3.83444e-17
csn-miR164a_L+1_2	CL2400.Contig2_All	NAC domain-containing protein 89-like	3	1391-1412	Y	0	110.762	down	-	1403			2	2	0	0	1.5681e-11	3.83444e-17
csn-miR164a-p3_2ss15CG18CG	Unigene20016_All	hypothetical protein	4	334-354	Y	0	166.144	down	-	345			3	3	0	0	1.4986e-16	2.32356e-25
	CL7135.Contig2_All	HMG1/2-like protein	2	1676-1695	Y	175.898	193.834	down	-0.140086	1686	5	2.5	7	3.5	0	0	5.0972e-15	7.1512e-14
	Unigene8101_All	HMG1/2-like protein	2	494-513	Y	175.898	193.834	down	-0.140086	504	5	2.5	7	3.5	0	0	5.0972e-15	7.1512e-14
	Unigene9187_All	transcription initiation factor TFIID subunit 15-like	3	960-980	Y	0	110.762	down	-	971			2	2	0	0	1.5681e-11	3.83444e-17
	CL3721.Contig4_All	uncharacterized LOC102590182	4	595-615	Y	0	83.0719	down	-	606			3	1.5	4	1	5.2752e-09	5.10122e-13
	Unigene26980_All	uncharacterized LOC103717866	3	534-554	Y	0	55.3812	down	-	545			1	1	2	2	1.8709e-06	1.14201e-08
	CL1184.Contig7_All	DNA repair protein rhp26	3	705-725	Y	0	55.3812	down	-	716			1	1	2	2	1.8709e-06	1.14201e-08
	CL4731.Contig2_CKL	uncharacterized LOC104609178	4	568-587	Y	0	55.3812	down	-	579			1	1	4	1	1.8709e-06	1.14201e-08
	CL4051.Contig2_All	Clp1-domain-containing protein	3.5	540-560	Y	0	55.3812	down	-	551			1	1	0	0	1.8709e-06	1.14201e-08
	CL3991.Contig1_EL	cellulose synthase-like protein D5	3	679-699	Y	0	55.3812	down	-	690			1	1	0	0	1.8709e-06	1.14201e-08
	CL1203.Contig3_All	calcium-dependent protein kinase 32-like	3	2040-2059	Y	0	55.3812	down	-	2050			2	1	0	0	1.8709e-06	1.14201e-08
	CL1645.Contig3_CKL	probable polyribonucleotide nucleotidyltransferase 1	4	1272-1292	Y	0	55.3812	down	-	1283			1	1	0	0	1.8709e-06	1.14201e-08
	CL1101.Contig2_All	SKP1-like protein 21	4	1499-1519	Y	0	55.3812	down	-	1510			1	1	0	0	1.8709e-06	1.14201e-08
	CL9837.Contig3_EL	mitogen-activated protein kinase kinase kinase 1-like	4	2287-2306	Y	0	55.3812	down	-	2297			1	1	0	0	1.8709e-06	1.14201e-08
	Unigene27726_All	calmodulin-like protein 3	3	556-575	Y	0	55.3812	down	-	566			1	1	0	0	1.8709e-06	1.14201e-08
	Unigene37628_EL	beta-glucosidase 44-like	3	95-115	Y	0	55.3812	down	-	106			1	1	0	0	1.8709e-06	1.14201e-08
	Unigene41977_EL	RNB-domain-containing protein	4	926-947	Y	140.718	221.525	down	-0.654659	938	2	2	4	4	0	0	4.3656e-05	7.96978e-05
	Unigene41797_All	DNA-repair protein XRCC1	3.5	503-523	Y	140.718	221.525	down	-0.654659	514	2	2	4	4	2	0	4.3656e-05	7.96978e-05
	CL1917.Contig1_All	5'-3' exoribonuclease 4-like	3.5	526-546	Y	70.3592	110.762	down	-0.654659	537	1	1	2	2	2	2	0.0038519	0.00536442
	CL8541.Contig1_EL	benzoxazin 6	4	1258-1278	Y	70.3592	110.762	down	-0.654659	1269	1	1	2	2	2	2	0.0038519	0.00536442
	CL8948.Contig1_All	nudix hydrolase 19	3	74-94	Y	0	18.4604	down	-	85			1	0.333333		4	0.0059205	0.00311168
	CL5402.Contig3_All	endoplasmin homolog	4	1033-1053	Y	140.718	276.906	down	-0.976587	1044	2	2	5	5		2	0.038393	0.0405936
csn-miR164a-p5_2ss15CG18CG	Unigene20016_All	hypothetical protein	4	334-354	Y	0	166.144	down	-	345			3	3		4	1.4986e-16	2.32356e-25
	Unigene8101_All	HMG1/2-like protein	2	494-513	Y	175.898	193.834	down	-0.140086	504	5	2.5	7	3.5		4	5.0972e-15	7.1512e-14
	CL7135.Contig2_All	HMG1/2-like protein	2	1676-1695	Y	175.898	193.834	down	-0.140086	1686	5	2.5	7	3.5		4	5.0972e-15	7.1512e-14
	Unigene9187_All	transcription initiation factor TFIID subunit 15-like	3	960-980	Y	0	110.762	down	-	971			2	2		4	1.5681e-11	3.83444e-17
	CL3721.Contig4_All	uncharacterized LOC102590182	4	595-615	Y	0	83.0719	down	-	606			3	1.5	4	3	5.2752e-09	5.10122e-13
	CL1203.Contig3_All	calcium-dependent protein kinase 32-like	3	2040-2059	Y	0	55.3812	down	-	2050			2	1		2	1.8709e-06	1.14201e-08
	CL1184.Contig7_All	DNA repair protein rhp26	3	705-725	Y	0	55.3812	down	-	716			1	1	4	2	1.8709e-06	1.14201e-08
	CL4051.Contig2_All	Clp1-domain-containing protein	3.5	540-560	Y	0	55.3812	down	-	551			1	1		2	1.8709e-06	1.14201e-08
	Unigene27726_All	calmodulin-like protein 3	3	556-575	Y	0	55.3812	down	-	566			1	1		2	1.8709e-06	1.14201e-08
	CL1101.Contig2_All	SKP1-like protein 21	4	1499-1519	Y	0	55.3812	down	-	1510			1	1	4	2	1.8709e-06	1.14201e-08
	CL4731.Contig2_CKL	uncharacterized LOC104609178	4	568-587	Y	0	55.3812	down	-	579			1	1		4	1.8709e-06	1.14201e-08
	CL9837.Contig3_EL	mitogen-activated protein kinase kinase kinase 1-like	4	2287-2306	Y	0	55.3812	down	-	2297			1	1		4	1.8709e-06	1.14201e-08
	CL1645.Contig3_CKL	probable polyribonucleotide nucleotidyltransferase 1	4	1272-1292	Y	0	55.3812	down	-	1283			1	1	2	2	1.8709e-06	1.14201e-08
	Unigene37628_EL	beta-glucosidase 44-like	3	95-115	Y	0	55.3812	down	-	106			1	1	4	3	1.8709e-06	1.14201e-08
	CL3991.Contig1_EL	cellulose synthase-like protein D5	3	679-699	Y	0	55.3812	down	-	690			1	1		2	1.8709e-06	1.14201e-08
	Unigene26980_All	uncharacterized LOC103717866	3	534-554	Y	0	55.3812	down	-	545			1	1	4	2	1.8709e-06	1.14201e-08
	Unigene41977_EL	RNB-domain-containing protein	4	926-947	Y	140.718	221.525	down	-0.654659	938	2	2	4	4		2	4.3656e-05	7.96978e-05
	Unigene41797_All	DNA-repair protein XRCC1	3.5	503-523	Y	140.718	221.525	down	-0.654659	514	2	2	4	4		2	4.3656e-05	7.96978e-05
	CL1917.Contig1_All	5'-3' exoribonuclease 4-like	3.5	526-546	Y	70.3592	110.762	down	-0.654659	537	1	1	2	2	4	2	0.0038519	0.00536442
	CL8541.Contig1_EL	benzoxazin 6	4	1258-1278	Y	70.3592	110.762	down	-0.654659	1269	1	1	2	2		4	0.0038519	0.00536442
	CL8948.Contig1_All	nudix hydrolase 19	3	74-94	Y	0	18.4604	down	-	85			1	0.333333		4	0.0059205	0.00311168
	CL5402.Contig3_All	endoplasmin homolog	4	1033-1053	Y	140.718	276.906	down	-0.976587	1044	2	2	5	5	2	2	0.038393	0.0405936
csn-miR164b-p3_2ss6CG21CT	Unigene11711_All	NADH dehydrogenase [ubiquinone] 1 beta subcomplex subunit 9	4	163-183	Y	0	221.525	down	-	174			4	4	2	0	1.5136e-21	8.91415e-34
	CL1295.Contig2_All	beta-amylase 1	3.5	1572-1593	Y	0	55.3812	down	-	1584			2	1	1	1	1.8709e-06	1.14201e-08
	CL577.Contig3_All	uncharacterized LOC100192545	4	468-488	Y	0	55.3812	down	-	479			3	1	2	0	1.8709e-06	1.14201e-08
	CL8875.Contig1_All	dynamin-2A	4	116-135	Y	70.3592	276.906	down	-1.97659	127	1	1	5	5	0	0	0.00029016	0.000187353
csn-miR164b-p5_2ss6CG21CT	Unigene11711_All	NADH dehydrogenase [ubiquinone] 1 beta subcomplex subunit 9	4	163-183	Y	0	221.525	down	-	174			4	4	0	0	1.5136e-21	8.91415e-34
	CL1295.Contig2_All	beta-amylase 1	3.5	1572-1593	Y	0	55.3812	down	-	1584			2	1	0	0	1.8709e-06	1.14201e-08
	CL577.Contig3_All	uncharacterized LOC100192545	4	468-488	Y	0	55.3812	down	-	479			3	1	0	0	1.8709e-06	1.14201e-08
	CL8875.Contig1_All	dynamin-2A	4	116-135	Y	70.3592	276.906	down	-1.97659	127	1	1	5	5		4	0.00029016	0.000187353
csn-miR164c-5p_1ss1TG	Unigene18223_All	NAC domain-containing protein 89-like	4	849-869	Y	3940.11	4430.5	down	-0.169232	860	56	56	80	80		4	0	1.02701e-263
csn-miR166a_R+2_3	CL2181.Contig4_All	glucan endo-1	4	1105-1126	Y	0	332.287	down	-	1117			6	6		4	1.6737e-31	3.42636e-50
	Unigene41820_All	glucan endo-1	3.5	1017-1038	Y	0	110.762	down	-	1029			2	2		2	1.5681e-11	3.83444e-17
csn-miR166b-p3_2ss6CG17TA	CL341.Contig1_All	uncharacterized LOC18427690	4	1083-1101	Y	140.718	166.144	down	-0.239622	1091	2	2	3	3		4	1.0071e-10	4.73549e-10
	CL1433.Contig1_All	hypothetical protein	3.5	423-440	Y	70.3592	332.287	down	-2.23962	431	1	1	6	6		2	2.8444e-07	8.27196e-08
	Unigene38828_CKL	18.2 kDa class I heat shock protein-like	4	100-117	Y	0	55.3812	down	-	108			2	1		4	1.8709e-06	1.14201e-08
	Unigene9534_All	18.1 kDa class I heat shock protein-like	4	100-117	Y	0	55.3812	down	-	108			2	1		4	1.8709e-06	1.14201e-08
	CL7684.Contig2_All	F20N2.19	4	1464-1481	Y	0	55.3812	down	-	1472			1	1		2	1.8709e-06	1.14201e-08
	CL11729.Contig2_All	uncharacterized LOC100839967	3.5	947-964	Y	0	27.6906	down	-	955			1	0.5		4	0.0007498	9.0674e-05
	CL5998.Contig1_All	uncharacterized LOC100839967	3.5	347-364	Y	0	27.6906	down	-	355			1	0.5		4	0.0007498	9.0674e-05
csn-miR166d-p5_2ss10CG20AC	CL3714.Contig1_All	bifunctional riboflavin biosynthesis protein RIBA 1	4	1451-1469	Y	0	110.762	down	-	1461			2	2		4	1.5681e-11	3.83444e-17
	Unigene3121_All	Pentatricopeptide repeat superfamily protein isoform 1	4	165-184	Y	0	55.3812	down	-	175			1	1		4	1.8709e-06	1.14201e-08
csn-miR166e-5p_1ss10GT	Unigene20064_All	hypothetical protein	4	395-414	Y	0	55.3812	down	-	405			1	1		3	1.8709e-06	1.14201e-08
csn-miR166e-p5_2ss10GT17CT	CL1883.Contig3_All	probable pectate lyase 5	4	3489-3506	Y	0	553.812	down	-	3497			10	10		3	2.3589e-51	3.36348e-83
	Unigene27078_All	nuclear-pore anchor	3	1678-1694	Y	0	110.762	down	-	1685			2	2		2	1.5681e-11	3.83444e-17
	CL2569.Contig1_All	peroxidase 72-like	4	106-123	Y	0	110.762	down	-	114			2	2	4	2	1.5681e-11	3.83444e-17
	Unigene31256_All	Poly(A) polymerase 1 isoform 1	3.5	1132-1148	Y	0	55.3812	down	-	1139			1	1	4	2	1.8709e-06	1.14201e-08
	Unigene31140_All	abscisate beta-glucosyltransferase-like	4	66-83	Y	0	55.3812	down	-	74			1	1		4	1.8709e-06	1.14201e-08
	CL1779.Contig2_All	hypothetical protein	3.5	661-678	Y	0	55.3812	down	-	669			1	1		4	1.8709e-06	1.14201e-08
	CL2757.Contig1_All	UPF0483 protein AGAP003155-like	3	619-636	Y	0	55.3812	down	-	627			1	1		4	1.8709e-06	1.14201e-08
	CL1779.Contig3_All	hypothetical protein	3.5	491-508	Y	35.1796	55.3812	down	-0.654659	499	1	0.5	2	1		2	0.040999	0.0479952
	CL10400.Contig2_All	Glutamyl-tRNA(Gln) amidotransferase subunit A	4	712-728	Y	35.1796	83.0719	down	-1.23962	719	1	0.5	2	1.5	2	2	0.87507	0.91931
csn-miR166g-5p	Unigene20064_All	hypothetical protein	4	395-414	Y	0	55.3812	down	-	405			1	1		4	1.8709e-06	1.14201e-08
csn-miR166g-5p_1ss1GA	Unigene20064_All	hypothetical protein	3.5	395-414	Y	0	55.3812	down	-	405			1	1		4	1.8709e-06	1.14201e-08
csn-miR166g-5p_2ss11CT21GA	Unigene52300_All	uncharacterized LOC103721336	3	162-182	Y	0	55.3812	down	-	173			1	1		4	1.8709e-06	1.14201e-08
csn-miR166g-5p_2ss5GA8GT	Unigene12682_All	probable glutathione S-transferase	4	337-356	Y	0	13.8453	down	-	348			1	0.25		4	0.017152	0.0147607
csn-miR167_R-2_1ss4AC	CL1218.Contig1_All	cell division cycle protein 48 homolog	4	693-711	Y	0	110.762	down	-	702			2	2		4	1.5681e-11	3.83444e-17
csn-miR167a-p3_1	CL7276.Contig4_CKL	CBL-interacting protein kinase 2	4	1542-1559	Y	35.1796	83.0719	down	-1.23962	1551	2	0.5	6	1.5		4	0.87507	0.91931
	Unigene26206_All	CBL-interacting protein kinase 3	4	1671-1688	Y	35.1796	83.0719	down	-1.23962	1680	2	0.5	6	1.5		4	0.87507	0.91931
	CL2045.Contig3_All	CBL-interacting protein kinase 4	4	1588-1605	Y	35.1796	83.0719	down	-1.23962	1597	2	0.5	6	1.5	2	0	0.87507	0.91931
	Unigene5167_All	CBL-interacting protein kinase 5	4	1558-1575	Y	35.1796	83.0719	down	-1.23962	1567	2	0.5	6	1.5	2	0	0.87507	0.91931
csn-miR167a-p3_2	CL10192.Contig2_All	glucan endo-1	4	651-670	Y	0	55.3812	down	-	661			1	1	2	0	1.8709e-06	1.14201e-08
	CL1000.Contig17_All	kinesin-1-like protein PSS1	4	1072-1090	Y	0	18.4604	down	-	1082			1	0.333333	2	0	0.0059205	0.00311168
	Unigene42539_EL	Similar to predicted protein.	4	176-194	Y	0	18.4604	down	-	186			1	0.333333	4	0	0.0059205	0.00311168
csn-miR167k_R-3_1ss9CT	CL9856.Contig2_CKL	auxin response factor 7-like	4	1164-1183	Y	3166.16	4762.79	down	-0.589071	1173	45	45	86	86	4	0	0	1.31208e-94
csn-miR168	Unigene24397_All	beta-glucosidase 40-like	3	311-331	Y	4151.19	13513	down	-1.70275	322	59	59	244	244		2	1.8755e-60	6.30007e-63
csn-miR168_1ss5TC	Unigene5292_All	hypothetical protein	3.5	1018-1038	Y	0	110.762	down	-	1029			2	2		2	1.5681e-11	3.83444e-17
csn-miR168_L-3R-2	Unigene19987_All	L-galactose dehydrogenase	2.5	403-420	Y	0	55.3812	down	-	412			1	1		2	1.8709e-06	1.14201e-08
csn-miR168c-3p_L-1	CL11578.Contig2_All	dynamin-related protein 1E	4	921-940	Y	0	55.3812	down	-	931			1	1		2	1.8709e-06	1.14201e-08
csn-miR169a_R-2	Unigene23274_All	nuclear transcription factor Y subunit A-3	2	1462-1480	Y	0	332.287	down	-	1471			6	6		2	1.6737e-31	3.42636e-50
	CL5965.Contig2_All	hypothetical protein	3.5	1500-1518	Y	0	55.3812	down	-	1509			1	1	4	2	1.8709e-06	1.14201e-08
	CL6360.Contig2_All	nuclear transcription factor Y subunit A-3	3	1361-1379	Y	1407.18	3027.51	down	-1.10532	1370	60	20	164	54.6667		2	0.00010877	0.000132479
	CL6360.Contig3_All	nuclear transcription factor Y subunit A-3	3	1168-1186	Y	1407.18	3027.51	down	-1.10532	1177	60	20	164	54.6667		4	0.00010877	0.000132479
	Unigene2230_All	nuclear transcription factor Y subunit A-3	3	1144-1162	Y	1196.11	2602.92	down	-1.12179	1153	17	17	47	47		4	0.001167	0.00129488
	CL9165.Contig2_CKL	nuclear transcription factor Y subunit A-3	2	736-754	Y	35.1796	110.762	down	-1.65466	745	1	0.5	4	2		4	0.1846	0.201792
csn-miR169b	Unigene23274_All	nuclear transcription factor Y subunit A-3	4	1459-1480	Y	0	332.287	down	-	1471			6	6		2	1.6737e-31	3.42636e-50
	CL6360.Contig2_All	nuclear transcription factor Y subunit A-3	3.5	1357-1379	Y	1407.18	3027.51	down	-1.10532	1370	60	20	164	54.6667	4	2	0.00010877	0.000132479
	CL6360.Contig3_All	nuclear transcription factor Y subunit A-3	3.5	1164-1186	Y	1407.18	3027.51	down	-1.10532	1177	60	20	164	54.6667		2	0.00010877	0.000132479
	Unigene2230_All	nuclear transcription factor Y subunit A-3	3	1141-1162	Y	1196.11	2602.92	down	-1.12179	1153	17	17	47	47		4	0.001167	0.00129488
	CL9165.Contig2_CKL	nuclear transcription factor Y subunit A-3	4	733-754	Y	35.1796	110.762	down	-1.65466	745	1	0.5	4	2		4	0.1846	0.201792
csn-miR169c-p3_2ss12GC17TG	CL652.Contig2_All	hypothetical protein	4	1049-1066	Y	0	221.525	down	-	1057			4	4		4	1.5136e-21	8.91415e-34
csn-miR169e	Unigene23274_All	nuclear transcription factor Y subunit A-3	4	1459-1480	Y	0	332.287	down	-	1471			6	6		2	1.6737e-31	3.42636e-50
	Unigene2230_All	nuclear transcription factor Y subunit A-3	4	1141-1162	Y	1196.11	2602.92	down	-1.12179	1153	17	17	47	47	4	2	0.001167	0.00129488
	CL9165.Contig2_CKL	nuclear transcription factor Y subunit A-3	4	733-754	Y	35.1796	110.762	down	-1.65466	745	1	0.5	4	2		2	0.1846	0.201792
csn-miR169e_R-1_1ss21GT	CL6360.Contig3_All	nuclear transcription factor Y subunit A-3	3	1166-1186	Y	1407.18	3027.51	down	-1.10532	1177	60	20	164	54.6667		4	0.00010877	0.000132479
	CL6360.Contig2_All	nuclear transcription factor Y subunit A-3	3	1359-1379	Y	1407.18	3027.51	down	-1.10532	1370	60	20	164	54.6667		4	0.00010877	0.000132479
	Unigene2230_All	nuclear transcription factor Y subunit A-3	4	1142-1162	Y	1196.11	2602.92	down	-1.12179	1153	17	17	47	47		4	0.001167	0.00129488
	CL9165.Contig2_CKL	nuclear transcription factor Y subunit A-3	3.5	734-754	Y	35.1796	110.762	down	-1.65466	745	1	0.5	4	2		4	0.1846	0.201792
csn-miR169e_R-2_1ss13AG	CL6360.Contig3_All	nuclear transcription factor Y subunit A-3	4	1167-1186	Y	1407.18	3027.51	down	-1.10532	1177	60	20	164	54.6667	0	0	0.00010877	0.000132479
	CL6360.Contig2_All	nuclear transcription factor Y subunit A-3	4	1360-1379	Y	1407.18	3027.51	down	-1.10532	1370	60	20	164	54.6667	0	0	0.00010877	0.000132479
	Unigene2230_All	nuclear transcription factor Y subunit A-3	4	1143-1162	Y	1196.11	2602.92	down	-1.12179	1153	17	17	47	47	2	0	0.001167	0.00129488
	CL9165.Contig2_CKL	nuclear transcription factor Y subunit A-3	3.5	735-754	Y	35.1796	110.762	down	-1.65466	745	1	0.5	4	2	0	0	0.1846	0.201792
csn-miR169e_R-3	Unigene23274_All	nuclear transcription factor Y subunit A-3	2.5	1462-1480	Y	0	332.287	down	-	1471			6	6	0	0	1.6737e-31	3.42636e-50
	CL6360.Contig2_All	nuclear transcription factor Y subunit A-3	2	1361-1379	Y	1407.18	3027.51	down	-1.10532	1370	60	20	164	54.6667	0	0	0.00010877	0.000132479
	CL6360.Contig3_All	nuclear transcription factor Y subunit A-3	2	1168-1186	Y	1407.18	3027.51	down	-1.10532	1177	60	20	164	54.6667	0	0	0.00010877	0.000132479
	Unigene2230_All	nuclear transcription factor Y subunit A-3	3	1144-1162	Y	1196.11	2602.92	down	-1.12179	1153	17	17	47	47		3	0.001167	0.00129488
	CL9165.Contig2_CKL	nuclear transcription factor Y subunit A-3	2	736-754	Y	35.1796	110.762	down	-1.65466	745	1	0.5	4	2	0	0	0.1846	0.201792
csn-miR169f_L+2R-2	Unigene23274_All	nuclear transcription factor Y subunit A-3	4	1462-1482	Y	0	55.3812	down	-	1473			1	1		0	1.8709e-06	1.14201e-08
csn-miR169f_R-1_1ss20GA	Unigene23274_All	nuclear transcription factor Y subunit A-3	2	1461-1480	Y	0	332.287	down	-	1471			6	6		0	1.6737e-31	3.42636e-50
	CL6360.Contig2_All	nuclear transcription factor Y subunit A-3	3	1360-1379	Y	1407.18	3027.51	down	-1.10532	1370	60	20	164	54.6667		0	0.00010877	0.000132479
	CL6360.Contig3_All	nuclear transcription factor Y subunit A-3	3	1167-1186	Y	1407.18	3027.51	down	-1.10532	1177	60	20	164	54.6667	0	0	0.00010877	0.000132479
	Unigene2230_All	nuclear transcription factor Y subunit A-3	4	1143-1162	Y	1196.11	2602.92	down	-1.12179	1153	17	17	47	47		2	0.001167	0.00129488
	CL9165.Contig2_CKL	nuclear transcription factor Y subunit A-3	3	735-754	Y	35.1796	110.762	down	-1.65466	745	1	0.5	4	2		2	0.1846	0.201792
csn-miR169f_R-1_2ss20TC21GT	CL6360.Contig2_All	nuclear transcription factor Y subunit A-3	3	1359-1379	Y	1407.18	3027.51	down	-1.10532	1370	60	20	164	54.6667	4	2	0.00010877	0.000132479
	CL6360.Contig3_All	nuclear transcription factor Y subunit A-3	3	1166-1186	Y	1407.18	3027.51	down	-1.10532	1177	60	20	164	54.6667	4	2	0.00010877	0.000132479
	CL9165.Contig2_CKL	nuclear transcription factor Y subunit A-3	3	734-754	Y	35.1796	110.762	down	-1.65466	745	1	0.5	4	2		2	0.1846	0.201792
csn-miR169f-p3_2ss11AT18AC	CL12199.Contig2_All	spartin-like	4	769-785	Y	0	110.762	down	-	776			2	2		2	1.5681e-11	3.83444e-17
	Unigene61225_All	very-long-chain 3-oxoacyl-CoA reductase 1	4	350-367	Y	0	27.6906	down	-	358			1	0.5		2	0.0007498	9.0674e-05
csn-miR169g-p3_2ss12CT18GC	CL7603.Contig2_All	UDP-glycosyltransferase 72E1-like	3.5	1134-1152	Y	70.3592	110.762	down	-0.654659	1143	1	1	2	2	0	0	0.0038519	0.00536442
csn-miR169i_R+1	Unigene2230_All	nuclear transcription factor Y subunit A-3	4	1141-1162	Y	1196.11	2602.92	down	-1.12179	1153	17	17	47	47		0	0.001167	0.00129488
	CL9165.Contig2_CKL	nuclear transcription factor Y subunit A-3	4	733-754	Y	35.1796	110.762	down	-1.65466	745	1	0.5	4	2		0	0.1846	0.201792
csn-miR169k_R-1_2ss18CT20GC	Unigene23274_All	nuclear transcription factor Y subunit A-3	3.5	1461-1480	Y	0	332.287	down	-	1471			6	6		0	1.6737e-31	3.42636e-50
	Unigene2230_All	nuclear transcription factor Y subunit A-3	4	1143-1162	Y	1196.11	2602.92	down	-1.12179	1153	17	17	47	47	4	2	0.001167	0.00129488
	CL9165.Contig2_CKL	nuclear transcription factor Y subunit A-3	1	735-754	Y	35.1796	110.762	down	-1.65466	745	1	0.5	4	2	4	2	0.1846	0.201792
csn-miR169q_R-2	CL6360.Contig3_All	nuclear transcription factor Y subunit A-3	4	1168-1186	Y	1407.18	3027.51	down	-1.10532	1177	60	20	164	54.6667		2	0.00010877	0.000132479
	CL6360.Contig2_All	nuclear transcription factor Y subunit A-3	4	1361-1379	Y	1407.18	3027.51	down	-1.10532	1370	60	20	164	54.6667		2	0.00010877	0.000132479
	CL9165.Contig2_CKL	nuclear transcription factor Y subunit A-3	4	736-754	Y	35.1796	110.762	down	-1.65466	745	1	0.5	4	2		2	0.1846	0.201792
csn-miR169x	Unigene23274_All	nuclear transcription factor Y subunit A-3	3.5	1460-1480	Y	0	332.287	down	-	1471			6	6		2	1.6737e-31	3.42636e-50
	CL6360.Contig3_All	nuclear transcription factor Y subunit A-3	3	1165-1186	Y	1407.18	3027.51	down	-1.10532	1177	60	20	164	54.6667		2	0.00010877	0.000132479
	CL6360.Contig2_All	nuclear transcription factor Y subunit A-3	3	1358-1379	Y	1407.18	3027.51	down	-1.10532	1370	60	20	164	54.6667		2	0.00010877	0.000132479
	Unigene2230_All	nuclear transcription factor Y subunit A-3	4	1142-1162	Y	1196.11	2602.92	down	-1.12179	1153	17	17	47	47	0	0	0.001167	0.00129488
	CL9165.Contig2_CKL	nuclear transcription factor Y subunit A-3	2.5	734-754	Y	35.1796	110.762	down	-1.65466	745	1	0.5	4	2		0	0.1846	0.201792
csn-miR169x-p3_2ss6AT19AG	CL1306.Contig1_CKL	hypothetical protein	4	1008-1025	Y	0	55.3812	down	-	1016			1	1		0	1.8709e-06	1.14201e-08
csn-miR171a	CL2557.Contig3_All	DELLA protein GAI	1	1167-1187	Y	70.3592	830.719	down	-3.56155	1178	4	1	60	15		0	5.8983e-45	1.6331e-56
	CL13477.Contig4_All	DELLA protein GAI	1	1444-1464	Y	70.3592	830.719	down	-3.56155	1455	4	1	60	15	4	2	5.8983e-45	1.6331e-56
	Unigene9197_All	DELLA protein GAI	1	1355-1375	Y	70.3592	830.719	down	-3.56155	1366	4	1	60	15	4	2	5.8983e-45	1.6331e-56
	CL847.Contig2_All	DELLA protein GAI	1	498-518	Y	70.3592	830.719	down	-3.56155	509	4	1	60	15		2	5.8983e-45	1.6331e-56
	Unigene21432_All	DELLA protein RGA-like	1	976-996	Y	0	138.453	down	-	987			5	2.5		2	4.8018e-14	3.07099e-21
	CL13477.Contig3_All	DELLA protein SLR1-like	1	1253-1273	Y	0	138.453	down	-	1264			5	2.5		2	4.8018e-14	3.07099e-21
	CL2557.Contig2_All	DELLA protein GAI-like	1	1164-1184	Y	0	36.9208	down	-	1175			2	0.666667		2	9.9363e-05	4.43161e-06
	CL13477.Contig1_All	DELLA protein GAI-like	1	1444-1464	Y	0	36.9208	down	-	1455			2	0.666667		2	9.9363e-05	4.43161e-06
csn-miR171a_1ss1TC	CL847.Contig2_All	DELLA protein GAI	2	498-518	Y	70.3592	830.719	down	-3.56155	509	4	1	60	15	0	0	5.8983e-45	1.6331e-56
	CL2557.Contig3_All	DELLA protein GAI	2	1167-1187	Y	70.3592	830.719	down	-3.56155	1178	4	1	60	15		0	5.8983e-45	1.6331e-56
	Unigene9197_All	DELLA protein GAI	2	1355-1375	Y	70.3592	830.719	down	-3.56155	1366	4	1	60	15		0	5.8983e-45	1.6331e-56
	CL13477.Contig4_All	DELLA protein GAI	2	1444-1464	Y	70.3592	830.719	down	-3.56155	1455	4	1	60	15		0	5.8983e-45	1.6331e-56
	Unigene21432_All	DELLA protein RGA-like	2	976-996	Y	0	138.453	down	-	987			5	2.5		2	4.8018e-14	3.07099e-21
	CL13477.Contig3_All	DELLA protein SLR1-like	2	1253-1273	Y	0	138.453	down	-	1264			5	2.5		2	4.8018e-14	3.07099e-21
	CL2557.Contig2_All	DELLA protein GAI-like	2	1164-1184	Y	0	36.9208	down	-	1175			2	0.666667	4	2	9.9363e-05	4.43161e-06
	CL13477.Contig1_All	DELLA protein GAI-like	2	1444-1464	Y	0	36.9208	down	-	1455			2	0.666667	4	2	9.9363e-05	4.43161e-06
csn-miR171a_R+1	CL847.Contig2_All	DELLA protein GAI	1	497-518	Y	70.3592	830.719	down	-3.56155	509	4	1	60	15	2	2	5.8983e-45	1.6331e-56
	Unigene9197_All	DELLA protein GAI	1	1354-1375	Y	70.3592	830.719	down	-3.56155	1366	4	1	60	15		4	5.8983e-45	1.6331e-56
	CL13477.Contig4_All	DELLA protein GAI	2	1443-1464	Y	70.3592	830.719	down	-3.56155	1455	4	1	60	15		2	5.8983e-45	1.6331e-56
	CL2557.Contig3_All	DELLA protein GAI	1	1166-1187	Y	70.3592	830.719	down	-3.56155	1178	4	1	60	15		2	5.8983e-45	1.6331e-56
	Unigene21432_All	DELLA protein RGA-like	1	975-996	Y	0	138.453	down	-	987			5	2.5		2	4.8018e-14	3.07099e-21
	CL13477.Contig3_All	DELLA protein SLR1-like	1	1252-1273	Y	0	138.453	down	-	1264			5	2.5	0	0	4.8018e-14	3.07099e-21
	CL13477.Contig1_All	DELLA protein GAI-like	2	1443-1464	Y	0	36.9208	down	-	1455			2	0.666667	0	0	9.9363e-05	4.43161e-06
	CL2557.Contig2_All	DELLA protein GAI-like	1	1163-1184	Y	0	36.9208	down	-	1175			2	0.666667	0	0	9.9363e-05	4.43161e-06
csn-miR171a-3p	CL4809.Contig3_All	hypothetical protein	0.5	119-139	Y	0	221.525	down	-	130			4	4	2	0	1.5136e-21	8.91415e-34
csn-miR171a-p3	CL847.Contig2_All	DELLA protein GAI	2	498-518	Y	70.3592	830.719	down	-3.56155	509	4	1	60	15	2	0	5.8983e-45	1.6331e-56
	CL13477.Contig4_All	DELLA protein GAI	2	1444-1464	Y	70.3592	830.719	down	-3.56155	1455	4	1	60	15	2	0	5.8983e-45	1.6331e-56
	Unigene9197_All	DELLA protein GAI	2	1355-1375	Y	70.3592	830.719	down	-3.56155	1366	4	1	60	15	2	0	5.8983e-45	1.6331e-56
	CL2557.Contig3_All	DELLA protein GAI	2	1167-1187	Y	70.3592	830.719	down	-3.56155	1178	4	1	60	15	0	0	5.8983e-45	1.6331e-56
	CL13477.Contig3_All	DELLA protein SLR1-like	2	1253-1273	Y	0	138.453	down	-	1264			5	2.5	0	0	4.8018e-14	3.07099e-21
	Unigene21432_All	DELLA protein RGA-like	2	976-996	Y	0	138.453	down	-	987			5	2.5	0	0	4.8018e-14	3.07099e-21
	CL2557.Contig2_All	DELLA protein GAI-like	2	1164-1184	Y	0	36.9208	down	-	1175			2	0.666667	0	0	9.9363e-05	4.43161e-06
	CL13477.Contig1_All	DELLA protein GAI-like	2	1444-1464	Y	0	36.9208	down	-	1455			2	0.666667	0	0	9.9363e-05	4.43161e-06
csn-miR171a-p5	Unigene22844_All	hypothetical protein	3	682-701	Y	0	110.762	down	-	693			2	2	0	0	1.5681e-11	3.83444e-17
csn-miR171b	CL847.Contig2_All	DELLA protein GAI	1	495-515	Y	0	290.752	down	-	506			21	5.25		4	8.9841e-28	6.50432e-44
	CL13477.Contig4_All	DELLA protein GAI	2	1441-1461	Y	0	290.752	down	-	1452			21	5.25	4	2	8.9841e-28	6.50432e-44
	Unigene9197_All	DELLA protein GAI	1	1352-1372	Y	0	290.752	down	-	1363			21	5.25	2	2	8.9841e-28	6.50432e-44
	CL2557.Contig3_All	DELLA protein GAI	1	1164-1184	Y	0	290.752	down	-	1175			21	5.25		4	8.9841e-28	6.50432e-44
	Unigene21432_All	DELLA protein RGA-like	1	973-993	Y	0	193.834	down	-	984			7	3.5		4	4.7395e-19	1.89018e-29
	CL13477.Contig3_All	DELLA protein SLR1-like	1	1250-1270	Y	0	193.834	down	-	1261			7	3.5		4	4.7395e-19	1.89018e-29
	CL2557.Contig2_All	DELLA protein GAI-like	1	1161-1181	Y	0	129.223	down	-	1172			7	2.33333		4	3.2984e-13	1.03208e-19
	CL13477.Contig1_All	DELLA protein GAI-like	2	1441-1461	Y	0	129.223	down	-	1452			7	2.33333	0	0	3.2984e-13	1.03208e-19
	CL7052.Contig1_All	AtGAI1 GRAS E3 ubiquitin ligase protein	1	2033-2053	Y	633.232	1882.96	down	-1.5722	2044	9	9	34	34	2	0	1.4362e-05	1.1162e-05
csn-miR171d_1ss2GA	Unigene9197_All	DELLA protein GAI	3	1355-1375	Y	70.3592	830.719	down	-3.56155	1366	4	1	60	15	2	0	5.8983e-45	1.6331e-56
	CL2557.Contig3_All	DELLA protein GAI	3	1167-1187	Y	70.3592	830.719	down	-3.56155	1178	4	1	60	15	2	0	5.8983e-45	1.6331e-56
	CL847.Contig2_All	DELLA protein GAI	3	498-518	Y	70.3592	830.719	down	-3.56155	509	4	1	60	15		0	5.8983e-45	1.6331e-56
	CL13477.Contig4_All	DELLA protein GAI	3	1444-1464	Y	70.3592	830.719	down	-3.56155	1455	4	1	60	15	0	0	5.8983e-45	1.6331e-56
	Unigene21432_All	DELLA protein RGA-like	3	976-996	Y	0	138.453	down	-	987			5	2.5	0	0	4.8018e-14	3.07099e-21
	CL13477.Contig3_All	DELLA protein SLR1-like	3	1253-1273	Y	0	138.453	down	-	1264			5	2.5		0	4.8018e-14	3.07099e-21
	CL2557.Contig2_All	DELLA protein GAI-like	3	1164-1184	Y	0	36.9208	down	-	1175			2	0.666667		0	9.9363e-05	4.43161e-06
	CL13477.Contig1_All	DELLA protein GAI-like	3	1444-1464	Y	0	36.9208	down	-	1455			2	0.666667	4	2	9.9363e-05	4.43161e-06
csn-miR171e	CL847.Contig2_All	DELLA protein GAI	0	498-518	Y	70.3592	830.719	down	-3.56155	509	4	1	60	15		4	5.8983e-45	1.6331e-56
	CL13477.Contig4_All	DELLA protein GAI	0	1444-1464	Y	70.3592	830.719	down	-3.56155	1455	4	1	60	15		2	5.8983e-45	1.6331e-56
	CL2557.Contig3_All	DELLA protein GAI	0	1167-1187	Y	70.3592	830.719	down	-3.56155	1178	4	1	60	15		4	5.8983e-45	1.6331e-56
	Unigene9197_All	DELLA protein GAI	0	1355-1375	Y	70.3592	830.719	down	-3.56155	1366	4	1	60	15		4	5.8983e-45	1.6331e-56
	CL13477.Contig3_All	DELLA protein SLR1-like	0	1253-1273	Y	0	138.453	down	-	1264			5	2.5		3	4.8018e-14	3.07099e-21
	Unigene21432_All	DELLA protein RGA-like	0	976-996	Y	0	138.453	down	-	987			5	2.5		2	4.8018e-14	3.07099e-21
	CL13477.Contig1_All	DELLA protein GAI-like	0	1444-1464	Y	0	36.9208	down	-	1455			2	0.666667		2	9.9363e-05	4.43161e-06
	CL2557.Contig2_All	DELLA protein GAI-like	0	1164-1184	Y	0	36.9208	down	-	1175			2	0.666667		2	9.9363e-05	4.43161e-06
csn-miR171e-p3	Unigene9197_All	DELLA protein GAI	2	1353-1372	Y	0	290.752	down	-	1363			21	5.25		2	8.9841e-28	6.50432e-44
	CL2557.Contig3_All	DELLA protein GAI	2	1165-1184	Y	0	290.752	down	-	1175			21	5.25		2	8.9841e-28	6.50432e-44
	CL13477.Contig4_All	DELLA protein GAI	2	1442-1461	Y	0	290.752	down	-	1452			21	5.25		2	8.9841e-28	6.50432e-44
	CL847.Contig2_All	DELLA protein GAI	2	496-515	Y	0	290.752	down	-	506			21	5.25		2	8.9841e-28	6.50432e-44
	Unigene21432_All	DELLA protein RGA-like	2	974-993	Y	0	193.834	down	-	984			7	3.5		4	4.7395e-19	1.89018e-29
	CL13477.Contig3_All	DELLA protein SLR1-like	2	1251-1270	Y	0	193.834	down	-	1261			7	3.5		4	4.7395e-19	1.89018e-29
	CL13477.Contig1_All	DELLA protein GAI-like	2	1442-1461	Y	0	129.223	down	-	1452			7	2.33333		2	3.2984e-13	1.03208e-19
	CL2557.Contig2_All	DELLA protein GAI-like	2	1162-1181	Y	0	129.223	down	-	1172			7	2.33333		4	3.2984e-13	1.03208e-19
	CL7052.Contig1_All	AtGAI1 GRAS E3 ubiquitin ligase protein	1.5	2034-2053	Y	633.232	1882.96	down	-1.5722	2044	9	9	34	34		4	1.4362e-05	1.1162e-05
csn-miR171g	CL847.Contig2_All	DELLA protein GAI	1	498-518	Y	70.3592	830.719	down	-3.56155	509	4	1	60	15	3	2	5.8983e-45	1.6331e-56
	Unigene9197_All	DELLA protein GAI	1	1355-1375	Y	70.3592	830.719	down	-3.56155	1366	4	1	60	15		4	5.8983e-45	1.6331e-56
	CL2557.Contig3_All	DELLA protein GAI	1	1167-1187	Y	70.3592	830.719	down	-3.56155	1178	4	1	60	15		4	5.8983e-45	1.6331e-56
	CL13477.Contig4_All	DELLA protein GAI	1	1444-1464	Y	70.3592	830.719	down	-3.56155	1455	4	1	60	15		3	5.8983e-45	1.6331e-56
	CL4809.Contig3_All	hypothetical protein	2.5	119-139	Y	0	221.525	down	-	130			4	4		4	1.5136e-21	8.91415e-34
	CL13477.Contig3_All	DELLA protein SLR1-like	1	1253-1273	Y	0	138.453	down	-	1264			5	2.5		4	4.8018e-14	3.07099e-21
	Unigene21432_All	DELLA protein RGA-like	1	976-996	Y	0	138.453	down	-	987			5	2.5	2	2	4.8018e-14	3.07099e-21
	CL2557.Contig2_All	DELLA protein GAI-like	1	1164-1184	Y	0	36.9208	down	-	1175			2	0.666667	2	2	9.9363e-05	4.43161e-06
	CL13477.Contig1_All	DELLA protein GAI-like	1	1444-1464	Y	0	36.9208	down	-	1455			2	0.666667		4	9.9363e-05	4.43161e-06
csn-miR171k-3p	CL847.Contig2_All	DELLA protein GAI	1	495-515	Y	0	290.752	down	-	506			21	5.25		2	8.9841e-28	6.50432e-44
	CL2557.Contig3_All	DELLA protein GAI	1	1164-1184	Y	0	290.752	down	-	1175			21	5.25		4	8.9841e-28	6.50432e-44
	CL13477.Contig4_All	DELLA protein GAI	2	1441-1461	Y	0	290.752	down	-	1452			21	5.25		3	8.9841e-28	6.50432e-44
	Unigene9197_All	DELLA protein GAI	1	1352-1372	Y	0	290.752	down	-	1363			21	5.25		4	8.9841e-28	6.50432e-44
	CL13477.Contig3_All	DELLA protein SLR1-like	1	1250-1270	Y	0	193.834	down	-	1261			7	3.5		4	4.7395e-19	1.89018e-29
	Unigene21432_All	DELLA protein RGA-like	1	973-993	Y	0	193.834	down	-	984			7	3.5	4	2	4.7395e-19	1.89018e-29
	CL2557.Contig2_All	DELLA protein GAI-like	1	1161-1181	Y	0	129.223	down	-	1172			7	2.33333		4	3.2984e-13	1.03208e-19
	CL13477.Contig1_All	DELLA protein GAI-like	2	1441-1461	Y	0	129.223	down	-	1452			7	2.33333	3	2	3.2984e-13	1.03208e-19
	CL7052.Contig1_All	AtGAI1 GRAS E3 ubiquitin ligase protein	1	2033-2053	Y	633.232	1882.96	down	-1.5722	2044	9	9	34	34		2	1.4362e-05	1.1162e-05
csn-miR171m	CL13477.Contig4_All	DELLA protein GAI	4	1441-1461	Y	0	290.752	down	-	1452			21	5.25		2	8.9841e-28	6.50432e-44
	Unigene9197_All	DELLA protein GAI	2	1352-1372	Y	0	290.752	down	-	1363			21	5.25		2	8.9841e-28	6.50432e-44
	CL847.Contig2_All	DELLA protein GAI	2	495-515	Y	0	290.752	down	-	506			21	5.25		4	8.9841e-28	6.50432e-44
	CL2557.Contig3_All	DELLA protein GAI	2	1164-1184	Y	0	290.752	down	-	1175			21	5.25		4	8.9841e-28	6.50432e-44
	CL13477.Contig3_All	DELLA protein SLR1-like	2	1250-1270	Y	0	193.834	down	-	1261			7	3.5		4	4.7395e-19	1.89018e-29
	Unigene21432_All	DELLA protein RGA-like	2	973-993	Y	0	193.834	down	-	984			7	3.5		4	4.7395e-19	1.89018e-29
	CL2557.Contig2_All	DELLA protein GAI-like	2	1161-1181	Y	0	129.223	down	-	1172			7	2.33333		4	3.2984e-13	1.03208e-19
	CL13477.Contig1_All	DELLA protein GAI-like	4	1441-1461	Y	0	129.223	down	-	1452			7	2.33333		4	3.2984e-13	1.03208e-19
	CL745.Contig6_All	hypothetical protein	4	2988-3007	Y	0	110.762	down	-	2998			2	2	4	3	1.5681e-11	3.83444e-17
	CL7052.Contig1_All	AtGAI1 GRAS E3 ubiquitin ligase protein	3	2033-2053	Y	633.232	1882.96	down	-1.5722	2044	9	9	34	34		2	1.4362e-05	1.1162e-05
csn-miR171m_1ss21AT	CL2557.Contig3_All	DELLA protein GAI	1	1164-1184	Y	0	290.752	down	-	1175			21	5.25	2	2	8.9841e-28	6.50432e-44
	CL847.Contig2_All	DELLA protein GAI	1	495-515	Y	0	290.752	down	-	506			21	5.25		2	8.9841e-28	6.50432e-44
	CL13477.Contig4_All	DELLA protein GAI	3	1441-1461	Y	0	290.752	down	-	1452			21	5.25		1	8.9841e-28	6.50432e-44
	Unigene9197_All	DELLA protein GAI	1	1352-1372	Y	0	290.752	down	-	1363			21	5.25		3	8.9841e-28	6.50432e-44
	Unigene21432_All	DELLA protein RGA-like	1	973-993	Y	0	193.834	down	-	984			7	3.5		2	4.7395e-19	1.89018e-29
	CL13477.Contig3_All	DELLA protein SLR1-like	1	1250-1270	Y	0	193.834	down	-	1261			7	3.5		2	4.7395e-19	1.89018e-29
	CL13477.Contig1_All	DELLA protein GAI-like	3	1441-1461	Y	0	129.223	down	-	1452			7	2.33333	4	2	3.2984e-13	1.03208e-19
	CL2557.Contig2_All	DELLA protein GAI-like	1	1161-1181	Y	0	129.223	down	-	1172			7	2.33333		2	3.2984e-13	1.03208e-19
	CL7052.Contig1_All	AtGAI1 GRAS E3 ubiquitin ligase protein	3	2033-2053	Y	633.232	1882.96	down	-1.5722	2044	9	9	34	34		4	1.4362e-05	1.1162e-05
csn-miR171n_R-1_1ss18CT	Unigene34350_CKL	probable xyloglucan endotransglucosylase/hydrolase protein 23	4	774-793	Y	140.718	1661.44	down	-3.56155	784	2	2	30	30		4	4.18e-88	1.04103e-110
	Unigene9197_All	DELLA protein GAI	2	1353-1372	Y	0	290.752	down	-	1363			21	5.25		2	8.9841e-28	6.50432e-44
	CL847.Contig2_All	DELLA protein GAI	2	496-515	Y	0	290.752	down	-	506			21	5.25		2	8.9841e-28	6.50432e-44
	CL13477.Contig4_All	DELLA protein GAI	3.5	1442-1461	Y	0	290.752	down	-	1452			21	5.25		4	8.9841e-28	6.50432e-44
	CL2557.Contig3_All	DELLA protein GAI	2	1165-1184	Y	0	290.752	down	-	1175			21	5.25	2	2	8.9841e-28	6.50432e-44
	Unigene21432_All	DELLA protein RGA-like	2	974-993	Y	0	193.834	down	-	984			7	3.5		2	4.7395e-19	1.89018e-29
	CL13477.Contig3_All	DELLA protein SLR1-like	2	1251-1270	Y	0	193.834	down	-	1261			7	3.5		2	4.7395e-19	1.89018e-29
	CL2557.Contig2_All	DELLA protein GAI-like	2	1162-1181	Y	0	129.223	down	-	1172			7	2.33333		4	3.2984e-13	1.03208e-19
	CL13477.Contig1_All	DELLA protein GAI-like	3.5	1442-1461	Y	0	129.223	down	-	1452			7	2.33333		4	3.2984e-13	1.03208e-19
	CL7052.Contig1_All	AtGAI1 GRAS E3 ubiquitin ligase protein	3	2034-2053	Y	633.232	1882.96	down	-1.5722	2044	9	9	34	34		4	1.4362e-05	1.1162e-05
csn-miR172b-p3	Unigene14008_All	cysteine and histidine-rich domain-containing protein RAR1	4	612-631	Y	0	110.762	down	-	623			2	2		4	1.5681e-11	3.83444e-17
	CL671.Contig5_All	hypothetical protein	3.5	2097-2117	Y	0	55.3812	down	-	2108			1	1		2	1.8709e-06	1.14201e-08
	CL2493.Contig3_All	putative leucine--tRNA ligase	4	2229-2248	Y	70.3592	193.834	down	-1.46201	2239	2	1	7	3.5		4	0.37837	0.378842
	CL2493.Contig5_All	putative leucine--tRNA ligase	4	399-418	Y	70.3592	193.834	down	-1.46201	409	2	1	7	3.5	2	2	0.37837	0.378842
csn-miR172c	Unigene48_All	hypothetical protein	1.5	1415-1435	Y	4995.5	20629.5	down	-2.04601	1426	142	71	745	372.5	3	2	0	1.27087e-272
	CL42.Contig1_All	alpha-glucosidase 2-like	1.5	930-950	Y	4995.5	20629.5	down	-2.04601	941	142	71	745	372.5	2	2	0	1.27087e-272
	CL8796.Contig2_All	hypothetical protein	2	812-832	Y	211.077	1550.67	down	-2.87705	823	3	3	28	28	2	2	2.3679e-56	4.1033e-66
	CL671.Contig5_All	hypothetical protein	1	2101-2121	Y	70.3592	941.481	down	-3.74212	2112	1	1	17	17		2	3.0896e-54	3.5599e-69
	CL42.Contig7_All	hypothetical protein	2.5	1768-1788	Y	527.694	1532.21	down	-1.53785	1779	45	7.5	166	27.6667		4	0.00051246	0.000518101
	Unigene30339_All	hypothetical protein	2.5	927-947	Y	527.694	1532.21	down	-1.53785	938	45	7.5	166	27.6667		4	0.00051246	0.000518101
	CL1836.Contig7_All	G-type lectin S-receptor-like serine/threonine-protein kinase At1g11300	3	1908-1928	Y	0	18.4604	down	-	1919			1	0.333333		4	0.0059205	0.00311168
	Unigene31363_All	G-type lectin S-receptor-like serine/threonine-protein kinase At1g11300	3	266-286	Y	0	18.4604	down	-	277			1	0.333333		0	0.0059205	0.00311168
	CL1836.Contig8_All	G-type lectin S-receptor-like serine/threonine-protein kinase At1g11300	3	1914-1934	Y	0	18.4604	down	-	1925			1	0.333333		4	0.0059205	0.00311168
	Unigene39936_All	hypothetical protein	1	1410-1430	Y	28.1437	77.5337	down	-1.46201	1421	2	0.4	7	1.4		4	0.57744	0.593901
	CL2645.Contig3_All	Acid beta-fructofuranosidase precursor	1	952-972	Y	28.1437	77.5337	down	-1.46201	963	2	0.4	7	1.4		4	0.57744	0.593901
	Unigene39935_All	hypothetical protein	1	1639-1659	Y	28.1437	77.5337	down	-1.46201	1650	2	0.4	7	1.4		2	0.57744	0.593901
	CL2645.Contig7_All	hypothetical protein	1	1566-1586	Y	28.1437	77.5337	down	-1.46201	1577	2	0.4	7	1.4		4	0.57744	0.593901
	CL2645.Contig6_All	hypothetical protein	1	1503-1523	Y	28.1437	77.5337	down	-1.46201	1514	2	0.4	7	1.4		4	0.57744	0.593901
csn-miR172c-3p_1ss4AC	CL671.Contig5_All	hypothetical protein	4	2101-2121	Y	70.3592	941.481	down	-3.74212	2112	1	1	17	17		4	3.0896e-54	3.5599e-69
	Unigene32787_All	brassinosteroid LRR receptor kinase	3.5	178-198	Y	0	55.3812	down	-	189			1	1		4	1.8709e-06	1.14201e-08
	CL2645.Contig6_All	hypothetical protein	4	1503-1523	Y	28.1437	77.5337	down	-1.46201	1514	2	0.4	7	1.4		2	0.57744	0.593901
	CL2645.Contig7_All	hypothetical protein	4	1566-1586	Y	28.1437	77.5337	down	-1.46201	1577	2	0.4	7	1.4		4	0.57744	0.593901
	Unigene39935_All	hypothetical protein	4	1639-1659	Y	28.1437	77.5337	down	-1.46201	1650	2	0.4	7	1.4		4	0.57744	0.593901
	Unigene39936_All	hypothetical protein	4	1410-1430	Y	28.1437	77.5337	down	-1.46201	1421	2	0.4	7	1.4		4	0.57744	0.593901
	CL2645.Contig3_All	Acid beta-fructofuranosidase precursor	4	952-972	Y	28.1437	77.5337	down	-1.46201	963	2	0.4	7	1.4		0	0.57744	0.593901
csn-miR172c-5p	CL9831.Contig1_All	glutamate--tRNA ligase	3	1778-1798	Y	0	332.287	down	-	1789			6	6		4	1.6737e-31	3.42636e-50
csn-miR172c-p3_1ss9TC	Unigene48_All	hypothetical protein	1	1417-1437	Y	0	138.453	down	-	1428			5	2.5		4	4.8018e-14	3.07099e-21
	CL42.Contig1_All	alpha-glucosidase 2-like	1	932-952	Y	0	138.453	down	-	943			5	2.5		4	4.8018e-14	3.07099e-21
	CL42.Contig7_All	hypothetical protein	1	1770-1790	Y	0	9.23021	down	-	1781			1	0.166667		2	0.051647	0.0670041
	Unigene30339_All	hypothetical protein	1	929-949	Y	0	9.23021	down	-	940			1	0.166667		4	0.051647	0.0670041
csn-miR172d_L-2	CL42.Contig1_All	alpha-glucosidase 2-like	2	930-950	Y	4995.5	20629.5	down	-2.04601	941	142	71	745	372.5		4	0	1.27087e-272
	Unigene48_All	hypothetical protein	2	1415-1435	Y	4995.5	20629.5	down	-2.04601	1426	142	71	745	372.5		4	0	1.27087e-272
	CL8796.Contig2_All	hypothetical protein	3	812-832	Y	211.077	1550.67	down	-2.87705	823	3	3	28	28		4	2.3679e-56	4.1033e-66
	CL671.Contig5_All	hypothetical protein	3	2101-2121	Y	70.3592	941.481	down	-3.74212	2112	1	1	17	17		2	3.0896e-54	3.5599e-69
	CL42.Contig7_All	hypothetical protein	3	1768-1788	Y	527.694	1532.21	down	-1.53785	1779	45	7.5	166	27.6667		4	0.00051246	0.000518101
	Unigene30339_All	hypothetical protein	3	927-947	Y	527.694	1532.21	down	-1.53785	938	45	7.5	166	27.6667		4	0.00051246	0.000518101
	CL2645.Contig6_All	hypothetical protein	3	1503-1523	Y	28.1437	77.5337	down	-1.46201	1514	2	0.4	7	1.4		4	0.57744	0.593901
	CL2645.Contig7_All	hypothetical protein	3	1566-1586	Y	28.1437	77.5337	down	-1.46201	1577	2	0.4	7	1.4		2	0.57744	0.593901
	CL2645.Contig3_All	Acid beta-fructofuranosidase precursor	3	952-972	Y	28.1437	77.5337	down	-1.46201	963	2	0.4	7	1.4		4	0.57744	0.593901
	Unigene39936_All	hypothetical protein	3	1410-1430	Y	28.1437	77.5337	down	-1.46201	1421	2	0.4	7	1.4		2	0.57744	0.593901
	Unigene39935_All	hypothetical protein	3	1639-1659	Y	28.1437	77.5337	down	-1.46201	1650	2	0.4	7	1.4		4	0.57744	0.593901
csn-miR172d_L-2R+1	Unigene48_All	hypothetical protein	2	1414-1435	Y	4995.5	20629.5	down	-2.04601	1426	142	71	745	372.5		4	0	1.27087e-272
	CL42.Contig1_All	alpha-glucosidase 2-like	2	929-950	Y	4995.5	20629.5	down	-2.04601	941	142	71	745	372.5		2	0	1.27087e-272
	CL8796.Contig2_All	hypothetical protein	3	811-832	Y	211.077	1550.67	down	-2.87705	823	3	3	28	28	4	2	2.3679e-56	4.1033e-66
	CL671.Contig5_All	hypothetical protein	3.5	2100-2121	Y	70.3592	941.481	down	-3.74212	2112	1	1	17	17	4	3	3.0896e-54	3.5599e-69
	Unigene30339_All	hypothetical protein	3	926-947	Y	527.694	1532.21	down	-1.53785	938	45	7.5	166	27.6667		4	0.00051246	0.000518101
	CL42.Contig7_All	hypothetical protein	3	1767-1788	Y	527.694	1532.21	down	-1.53785	1779	45	7.5	166	27.6667		2	0.00051246	0.000518101
	CL2645.Contig7_All	hypothetical protein	3.5	1565-1586	Y	28.1437	77.5337	down	-1.46201	1577	2	0.4	7	1.4		2	0.57744	0.593901
	CL2645.Contig6_All	hypothetical protein	3.5	1502-1523	Y	28.1437	77.5337	down	-1.46201	1514	2	0.4	7	1.4		2	0.57744	0.593901
	Unigene39935_All	hypothetical protein	3.5	1638-1659	Y	28.1437	77.5337	down	-1.46201	1650	2	0.4	7	1.4		2	0.57744	0.593901
	CL2645.Contig3_All	Acid beta-fructofuranosidase precursor	3.5	951-972	Y	28.1437	77.5337	down	-1.46201	963	2	0.4	7	1.4		2	0.57744	0.593901
	Unigene39936_All	hypothetical protein	3.5	1409-1430	Y	28.1437	77.5337	down	-1.46201	1421	2	0.4	7	1.4		2	0.57744	0.593901
csn-miR172e-3p_L+1_1ss4AC	CL671.Contig5_All	hypothetical protein	4	2101-2121	Y	70.3592	941.481	down	-3.74212	2112	1	1	17	17		2	3.0896e-54	3.5599e-69
	Unigene32787_All	brassinosteroid LRR receptor kinase	3.5	178-198	Y	0	55.3812	down	-	189			1	1		4	1.8709e-06	1.14201e-08
	CL2645.Contig6_All	hypothetical protein	4	1503-1523	Y	28.1437	77.5337	down	-1.46201	1514	2	0.4	7	1.4	4	2	0.57744	0.593901
	Unigene39936_All	hypothetical protein	4	1410-1430	Y	28.1437	77.5337	down	-1.46201	1421	2	0.4	7	1.4	4	2	0.57744	0.593901
	Unigene39935_All	hypothetical protein	4	1639-1659	Y	28.1437	77.5337	down	-1.46201	1650	2	0.4	7	1.4		4	0.57744	0.593901
	CL2645.Contig7_All	hypothetical protein	4	1566-1586	Y	28.1437	77.5337	down	-1.46201	1577	2	0.4	7	1.4		4	0.57744	0.593901
	CL2645.Contig3_All	Acid beta-fructofuranosidase precursor	4	952-972	Y	28.1437	77.5337	down	-1.46201	963	2	0.4	7	1.4	4	2	0.57744	0.593901
csn-miR172e-p3_1ss16CT	Unigene10475_All	ABC transporter C family member 2-like	4	2572-2591	Y	0	110.762	down	-	2583			2	2		2	1.5681e-11	3.83444e-17
csn-miR172e-p5_1ss16CT	Unigene10475_All	ABC transporter C family member 2-like	4	2572-2591	Y	0	110.762	down	-	2583			2	2		3	1.5681e-11	3.83444e-17
csn-miR172k	CL42.Contig1_All	alpha-glucosidase 2-like	3	930-950	Y	4995.5	20629.5	down	-2.04601	941	142	71	745	372.5	4	3	0	1.27087e-272
	Unigene48_All	hypothetical protein	3	1415-1435	Y	4995.5	20629.5	down	-2.04601	1426	142	71	745	372.5		2	0	1.27087e-272
	CL8796.Contig2_All	hypothetical protein	2.5	812-832	Y	211.077	1550.67	down	-2.87705	823	3	3	28	28		4	2.3679e-56	4.1033e-66
	CL671.Contig5_All	hypothetical protein	3	2101-2121	Y	70.3592	941.481	down	-3.74212	2112	1	1	17	17	4	2	3.0896e-54	3.5599e-69
	CL1249.Contig15_All	glycine-rich RNA-binding protein 3	4	1575-1594	Y	0	55.3812	down	-	1586			1	1		4	1.8709e-06	1.14201e-08
	CL42.Contig7_All	hypothetical protein	4	1768-1788	Y	527.694	1532.21	down	-1.53785	1779	45	7.5	166	27.6667	2	2	0.00051246	0.000518101
	Unigene30339_All	hypothetical protein	4	927-947	Y	527.694	1532.21	down	-1.53785	938	45	7.5	166	27.6667	3	2	0.00051246	0.000518101
	Unigene39936_All	hypothetical protein	3	1410-1430	Y	28.1437	77.5337	down	-1.46201	1421	2	0.4	7	1.4		4	0.57744	0.593901
	CL2645.Contig6_All	hypothetical protein	3	1503-1523	Y	28.1437	77.5337	down	-1.46201	1514	2	0.4	7	1.4		4	0.57744	0.593901
	CL2645.Contig7_All	hypothetical protein	3	1566-1586	Y	28.1437	77.5337	down	-1.46201	1577	2	0.4	7	1.4		4	0.57744	0.593901
	CL2645.Contig3_All	Acid beta-fructofuranosidase precursor	3	952-972	Y	28.1437	77.5337	down	-1.46201	963	2	0.4	7	1.4		4	0.57744	0.593901
	Unigene39935_All	hypothetical protein	3	1639-1659	Y	28.1437	77.5337	down	-1.46201	1650	2	0.4	7	1.4		2	0.57744	0.593901
csn-miR172k_1ss5TA	Unigene13931_All	protein OS-9-like	4	985-1005	Y	0	55.3812	down	-	996			1	1		2	1.8709e-06	1.14201e-08
csn-miR319a	CL11556.Contig3_All	cyclic dof factor 1-like	3.5	513-532	Y	93.8122	646.114	down	-2.78394	523	4	1.33333	35	11.6667		4	8.2305e-23	3.26423e-26
	CL11556.Contig2_All	hypothetical protein	3.5	611-630	Y	93.8122	646.114	down	-2.78394	621	4	1.33333	35	11.6667		2	8.2305e-23	3.26423e-26
csn-miR319a_R-1	CL11556.Contig2_All	hypothetical protein	3.5	611-630	Y	93.8122	646.114	down	-2.78394	621	4	1.33333	35	11.6667		3	8.2305e-23	3.26423e-26
	CL11556.Contig3_All	cyclic dof factor 1-like	3.5	513-532	Y	93.8122	646.114	down	-2.78394	523	4	1.33333	35	11.6667	4	4	8.2305e-23	3.26423e-26
csn-miR319b_R-1	CL11556.Contig3_All	cyclic dof factor 1-like	3.5	513-532	Y	93.8122	646.114	down	-2.78394	523	4	1.33333	35	11.6667	3	2	8.2305e-23	3.26423e-26
	CL11556.Contig2_All	hypothetical protein	3.5	611-630	Y	93.8122	646.114	down	-2.78394	621	4	1.33333	35	11.6667	4	2	8.2305e-23	3.26423e-26
csn-miR319f-p5_1ss1AT	Unigene37451_All	SART-1 family protein DOT2	3	2824-2843	Y	0	55.3812	down	-	2834			1	1		4	1.8709e-06	1.14201e-08
csn-miR319g_L+1R-2	CL48.Contig1_All	Signal recognition particle	4	315-335	Y	0	55.3812	down	-	326			1	1		4	1.8709e-06	1.14201e-08
	CL11556.Contig3_All	cyclic dof factor 1-like	2.5	514-533	Y	0	18.4604	down	-	524			1	0.333333		4	0.0059205	0.00311168
	CL11556.Contig2_All	hypothetical protein	2.5	612-631	Y	0	18.4604	down	-	622			1	0.333333		4	0.0059205	0.00311168
csn-miR319m-p5_1ss1AT	Unigene37451_All	SART-1 family protein DOT2	3	2824-2843	Y	0	55.3812	down	-	2834			1	1		4	1.8709e-06	1.14201e-08
csn-miR391-p5_2ss16CT20GA	CL2920.Contig3_All	plasma membrane ATPase 4-like	4	192-212	Y	140.718	1661.44	down	-3.56155	203	2	2	30	30		2	4.18e-88	1.04103e-110
csn-miR393a	CL3747.Contig3_All	protein TRANSPORT INHIBITOR RESPONSE 1-like	1	1637-1656	Y	985.028	5261.22	down	-2.41716	1647	28	14	190	95		2	0	9.95283e-134
	CL1310.Contig2_All	protein TRANSPORT INHIBITOR RESPONSE 1-like	2	1858-1878	Y	13720	47184.8	down	-1.78204	1869	195	195	852	852		2	0	2e-297
	CL680.Contig2_CKL	hypothetical protein	1	1-20	Y	985.028	5261.22	down	-2.41716	11	28	14	190	95		2	0	9.95283e-134
	CL3747.Contig4_All	protein TRANSPORT INHIBITOR RESPONSE 1-like	1	1659-1678	Y	4010.47	25530.8	down	-2.67039	1669	57	57	461	461		2	0	0
	CL3185.Contig2_All	transcription factor PIF3-like	4	64-84	Y	35.1796	553.812	down	-3.97659	75	1	0.5	20	10		2	4.5814e-35	2.13182e-45
	CL1966.Contig2_All	transcription factor PIF4-like	4	65-85	Y	35.1796	553.812	down	-3.97659	76	1	0.5	20	10		4	4.5814e-35	2.13182e-45
	CL4950.Contig2_CKL	protein TRANSPORT INHIBITOR RESPONSE 1	2	1814-1834	Y	1723.8	5538.12	down	-1.68381	1825	49	24.5	200	100		2	8.5141e-24	1.29214e-24
	CL4950.Contig3_CKL	protein TRANSPORT INHIBITOR RESPONSE 1	2	1907-1927	Y	1723.8	5538.12	down	-1.68381	1918	49	24.5	200	100		2	8.5141e-24	1.29214e-24
csn-miR393a_1ss4AC	CL1310.Contig2_All	protein TRANSPORT INHIBITOR RESPONSE 1-like	4	1858-1878	Y	13720	47184.8	down	-1.78204	1869	195	195	852	852		2	0	2e-297
	CL3747.Contig3_All	protein TRANSPORT INHIBITOR RESPONSE 1-like	3	1637-1656	Y	985.028	5261.22	down	-2.41716	1647	28	14	190	95	0	0	0	9.95283e-134
	CL3747.Contig4_All	protein TRANSPORT INHIBITOR RESPONSE 1-like	3	1659-1678	Y	4010.47	25530.8	down	-2.67039	1669	57	57	461	461		4	0	0
	CL680.Contig2_CKL	hypothetical protein	3	1-20	Y	985.028	5261.22	down	-2.41716	11	28	14	190	95		4	0	9.95283e-134
	CL4950.Contig3_CKL	protein TRANSPORT INHIBITOR RESPONSE 1	4	1907-1927	Y	1723.8	5538.12	down	-1.68381	1918	49	24.5	200	100		4	8.5141e-24	1.29214e-24
	CL4950.Contig2_CKL	protein TRANSPORT INHIBITOR RESPONSE 1	4	1814-1834	Y	1723.8	5538.12	down	-1.68381	1825	49	24.5	200	100		4	8.5141e-24	1.29214e-24
csn-miR393a_R+1_1ss21CT	CL1310.Contig2_All	protein TRANSPORT INHIBITOR RESPONSE 1-like	1.5	1857-1878	Y	13720	47184.8	down	-1.78204	1869	195	195	852	852	1	0	0	2e-297
	CL3747.Contig4_All	protein TRANSPORT INHIBITOR RESPONSE 1-like	2	1657-1678	Y	4010.47	25530.8	down	-2.67039	1669	57	57	461	461		1	0	0
	CL3747.Contig3_All	protein TRANSPORT INHIBITOR RESPONSE 1-like	2.5	1635-1656	Y	985.028	5261.22	down	-2.41716	1647	28	14	190	95		2	0	9.95283e-134
	CL4950.Contig3_CKL	protein TRANSPORT INHIBITOR RESPONSE 1	1.5	1906-1927	Y	1723.8	5538.12	down	-1.68381	1918	49	24.5	200	100	2	2	8.5141e-24	1.29214e-24
	CL4950.Contig2_CKL	protein TRANSPORT INHIBITOR RESPONSE 1	1.5	1813-1834	Y	1723.8	5538.12	down	-1.68381	1825	49	24.5	200	100		2	8.5141e-24	1.29214e-24
csn-miR394b_L-1_1ss5CA	CL6872.Contig2_All	calmodulin-like protein 1	3.5	133-151	Y	0	55.3812	down	-	142			1	1		1	1.8709e-06	1.14201e-08
csn-miR394b-3p_1ss15TC	CL3937.Contig2_All	dnaJ protein P58IPK homolog	4	765-783	Y	0	13.8453	down	-	774			1	0.25		2	0.017152	0.0147607
csn-miR395a	CL12050.Contig1_All	ATP sulfurylase 1	3.5	477-497	Y	140.718	3378.26	down	-4.5854	488	2	2	61	61	2	2	0	0
csn-miR395a_1ss19CT	CL12050.Contig1_All	ATP sulfurylase 2	4	477-497	Y	140.718	3378.26	down	-4.5854	488	2	2	61	61		2	0	0
csn-miR395a_L-1	CL12050.Contig1_All	ATP sulfurylase 3	3	477-496	Y	0	166.144	down	-	487			3	3		4	1.4986e-16	2.32356e-25
csn-miR395c-p5_1ss8CG	CL6912.Contig2_All	uncharacterized CRM domain-containing protein At3g25440	4	1061-1081	Y	0	55.3812	down	-	1072			1	1		4	1.8709e-06	1.14201e-08
csn-miR396a_2ss5AC21AT	Unigene41647_All	uncharacterized LOC103707302	4	206-227	Y	35.1796	55.3812	down	-0.654659	217	1	0.5	2	1		4	0.040999	0.0479952
	CL4301.Contig2_All	60S ribosomal protein L18-3	4	598-619	Y	35.1796	55.3812	down	-0.654659	609	1	0.5	2	1	4	2	0.040999	0.0479952
	CL5900.Contig1_All	nuclear-pore anchor-like protein	3.5	1062-1082	Y	70.3592	166.144	down	-1.23962	1073	1	1	3	3		4	0.82404	0.830138
csn-miR396a_R-3_1ss4AC	Unigene21413_All	hypothetical protein	4	314-330	Y	0	276.906	down	-	321			5	5		4	1.5763e-26	5.5146e-42
	CL2037.Contig1_All	U-box domain-containing protein 3-like	4	1448-1464	Y	0	55.3812	down	-	1455			1	1		4	1.8709e-06	1.14201e-08
	Unigene58_All	uncharacterized LOC103400688	4	137-154	Y	0	27.6906	down	-	145			1	0.5		4	0.0007498	9.0674e-05
	Unigene41332_CKL	malate dehydrogenase 1	4	592-610	Y	140.718	276.906	down	-0.976587	600	2	2	5	5		1	0.038393	0.0405936
	CL2073.Contig1_EL	hypothetical protein	4	1567-1583	Y	70.3592	221.525	down	-1.65466	1574	1	1	4	4		2	0.060613	0.0534762
	Unigene38168_All	DNA (cytosine-5)-methyltransferase 1A-like	3	204-221	Y	17.5898	27.6906	down	-0.654659	212	1	0.25	1	0.5	2	2	0.14846	0.144575
csn-miR396a-p3_1ss19GA	CL7057.Contig1_All	hypothetical protein	4	772-792	Y	0	110.762	down	-	783			2	2	4	2	1.5681e-11	3.83444e-17
csn-miR396b	CL5698.Contig2_CKL	hypothetical protein	2.5	224-244	Y	140.718	2270.63	down	-4.01221	235	2	2	41	41		4	0	1.89569e-183
	Unigene24100_All	xylose isomerase	3.5	712-731	Y	1547.9	7310.32	down	-2.23962	722	22	22	132	132		4	0	2.13578e-141
	Unigene40174_All	ATPase 11	4	325-344	Y	0	110.762	down	-	335			6	2	0	0	1.5681e-11	3.83444e-17
	Unigene6662_All	plasma membrane ATPase 3	4	228-247	Y	0	110.762	down	-	238			6	2	2	0	1.5681e-11	3.83444e-17
	Unigene8253_All	ATPase 11	4	228-247	Y	0	110.762	down	-	238			6	2	2	0	1.5681e-11	3.83444e-17
	CL1933.Contig1_All	DNA-directed RNA polymerase V subunit 5A	3	479-497	Y	175.898	470.741	down	-1.42019	488	5	2.5	17	8.5	2	0	0.28963	0.299131
	CL1933.Contig2_All	DNA-directed RNA polymerase V subunit 5A	3	479-497	Y	175.898	470.741	down	-1.42019	488	5	2.5	17	8.5		0	0.28963	0.299131
csn-miR396b_R+1_1	Unigene24100_All	xylose isomerase	3.5	711-731	Y	1547.9	7310.32	down	-2.23962	722	22	22	132	132		0	0	2.13578e-141
	CL5698.Contig2_CKL	hypothetical protein	2.5	223-244	Y	140.718	2270.63	down	-4.01221	235	2	2	41	41	4	0	0	1.89569e-183
	CL1933.Contig1_All	DNA-directed RNA polymerase V subunit 5A	4	478-497	Y	175.898	470.741	down	-1.42019	488	5	2.5	17	8.5	4	2	0.28963	0.299131
	CL1933.Contig2_All	DNA-directed RNA polymerase V subunit 6A	4	478-497	Y	175.898	470.741	down	-1.42019	488	5	2.5	17	8.5	2	0	0.28963	0.299131
csn-miR396b_R+1_1ss2TC_1	CL5900.Contig1_All	nuclear-pore anchor-like protein	4	1062-1081	Y	70.3592	166.144	down	-1.23962	1073	1	1	3	3	2	0	0.82404	0.830138
csn-miR396b_R+1_1ss2TC_2	CL1719.Contig1_All	tyrosine--tRNA ligase	4	990-1010	Y	0	55.3812	down	-	1001			1	1	2	0	1.8709e-06	1.14201e-08
csn-miR396b_R+1_1ss7AT	CL2176.Contig1_All	hypothetical protein	4	560-579	Y	0	55.3812	down	-	571			1	1	2	0	1.8709e-06	1.14201e-08
	CL1393.Contig2_All	DNA repair and recombination protein RAD26	4	2906-2926	Y	0	55.3812	down	-	2917			1	1	4	0	1.8709e-06	1.14201e-08
csn-miR396b_R+1_2	CL5698.Contig2_CKL	hypothetical protein	3.5	223-244	Y	140.718	2270.63	down	-4.01221	235	2	2	41	41	4	0	0	1.89569e-183
	CL1933.Contig1_All	DNA-directed RNA polymerase V subunit 5A	3	478-497	Y	175.898	470.741	down	-1.42019	488	5	2.5	17	8.5		2	0.28963	0.299131
	CL1933.Contig2_All	DNA-directed RNA polymerase V subunit 6A	3	478-497	Y	175.898	470.741	down	-1.42019	488	5	2.5	17	8.5		2	0.28963	0.299131
csn-miR396b-p3_2ss18AT19CT	Unigene24100_All	xylose isomerase	3.5	713-731	Y	1547.9	7310.32	down	-2.23962	722	22	22	132	132		2	0	2.13578e-141
	CL2998.Contig2_All	Leucine-rich repeat protein kinase family protein	4	1693-1711	Y	1055.39	12626.9	down	-3.58066	1702	15	15	228	228		2	0	0
	CL5698.Contig2_CKL	hypothetical protein	2.5	226-244	Y	140.718	2270.63	down	-4.01221	235	2	2	41	41	2	2	0	1.89569e-183
	CL11433.Contig1_CKL	50S ribosomal protein L19	3	517-534	Y	0	166.144	down	-	525			3	3		4	1.4986e-16	2.32356e-25
	Unigene29785_All	60S ribosomal protein L7a	3	411-429	Y	0	110.762	down	-	420			2	2	0	0	1.5681e-11	3.83444e-17
	Unigene3078_All	RNA-binding protein 28	3	1380-1398	Y	0	55.3812	down	-	1389			1	1		2	1.8709e-06	1.14201e-08
	Unigene17216_All	bifunctional 3-dehydroquinate dehydratase/shikimate dehydrogenase	4	1764-1781	Y	0	55.3812	down	-	1773			1	1		2	1.8709e-06	1.14201e-08
	Unigene28073_CKL	bifunctional protein FolD 2-like	4	627-645	Y	70.3592	221.525	down	-1.65466	636	1	1	4	4		2	0.060613	0.0534762
	CL1933.Contig2_All	DNA-directed RNA polymerase V subunit 5A	4	479-497	Y	175.898	470.741	down	-1.42019	488	5	2.5	17	8.5		2	0.28963	0.299131
	CL1933.Contig1_All	DNA-directed RNA polymerase V subunit 6A	4	479-497	Y	175.898	470.741	down	-1.42019	488	5	2.5	17	8.5		4	0.28963	0.299131
	CL5900.Contig1_All	nuclear-pore anchor-like protein	4	1064-1082	Y	70.3592	166.144	down	-1.23962	1073	1	1	3	3		4	0.82404	0.830138
csn-miR396b-p3_2ss7AG20AG	Unigene24198_All	ATP-dependent RNA helicase SKI2	4	942-960	Y	0	221.525	down	-	951			4	4		2	1.5136e-21	8.91415e-34
csn-miR396b-p5_2ss18AT19CT	CL5698.Contig2_CKL	hypothetical protein	2.5	226-244	Y	140.718	2270.63	down	-4.01221	235	2	2	41	41		2	0	1.89569e-183
	Unigene24100_All	xylose isomerase	3.5	713-731	Y	1547.9	7310.32	down	-2.23962	722	22	22	132	132		4	0	2.13578e-141
	CL2998.Contig2_All	Leucine-rich repeat protein kinase family protein	4	1693-1711	Y	1055.39	12626.9	down	-3.58066	1702	15	15	228	228		4	0	0
	CL11433.Contig1_CKL	50S ribosomal protein L19	3	517-534	Y	0	166.144	down	-	525			3	3		4	1.4986e-16	2.32356e-25
	Unigene29785_All	60S ribosomal protein L7a	3	411-429	Y	0	110.762	down	-	420			2	2		4	1.5681e-11	3.83444e-17
	Unigene3078_All	RNA-binding protein 28	3	1380-1398	Y	0	55.3812	down	-	1389			1	1	4	2	1.8709e-06	1.14201e-08
	Unigene17216_All	bifunctional 3-dehydroquinate dehydratase/shikimate dehydrogenase	4	1764-1781	Y	0	55.3812	down	-	1773			1	1	4	2	1.8709e-06	1.14201e-08
	Unigene28073_CKL	bifunctional protein FolD 2-like	4	627-645	Y	70.3592	221.525	down	-1.65466	636	1	1	4	4	4	2	0.060613	0.0534762
	CL1933.Contig1_All	DNA-directed RNA polymerase V subunit 5A	4	479-497	Y	175.898	470.741	down	-1.42019	488	5	2.5	17	8.5	4	2	0.28963	0.299131
	CL1933.Contig2_All	DNA-directed RNA polymerase V subunit 6A	4	479-497	Y	175.898	470.741	down	-1.42019	488	5	2.5	17	8.5	0	0	0.28963	0.299131
	CL5900.Contig1_All	nuclear-pore anchor-like protein	4	1064-1082	Y	70.3592	166.144	down	-1.23962	1073	1	1	3	3	0	0	0.82404	0.830138
csn-miR396e-p3	CL427.Contig2_All	cysteine-rich receptor-like protein kinase 15	4	352-372	Y	14.0718	33.2287	down	-1.23962	363	1	0.2	3	0.6	4	0	0.92079	0.873845
csn-miR397a	Unigene9410_All	L-ascorbate oxidase-like	2.5	730-750	Y	70.3592	609.194	down	-3.11409	741	1	1	11	11	0	0	5.5326e-27	3.24664e-32
	Unigene22742_All	probable amino-acid acetyltransferase NAGS1	1	218-238	Y	0	110.762	down	-	229			2	2	0	0	1.5681e-11	3.83444e-17
	Unigene9685_All	L-ascorbate oxidase-like	2	718-738	Y	0	55.3812	down	-	729			1	1	0	0	1.8709e-06	1.14201e-08
	CL4302.Contig2_All	L-ascorbate oxidase-like	0.5	258-278	Y	0	55.3812	down	-	269			1	1	0	0	1.8709e-06	1.14201e-08
csn-miR397a_1ss10GC	Unigene9410_All	L-ascorbate oxidase-like	0.5	730-750	Y	70.3592	609.194	down	-3.11409	741	1	1	11	11	0	0	5.5326e-27	3.24664e-32
	Unigene22742_All	probable amino-acid acetyltransferase NAGS1	3	218-238	Y	0	110.762	down	-	229			2	2		4	1.5681e-11	3.83444e-17
	Unigene9685_All	L-ascorbate oxidase-like	4	718-738	Y	0	55.3812	down	-	729			1	1		2	1.8709e-06	1.14201e-08
	CL4302.Contig2_All	L-ascorbate oxidase-like	2.5	258-278	Y	0	55.3812	down	-	269			1	1		4	1.8709e-06	1.14201e-08
csn-miR397a_1ss2CA	Unigene22742_All	probable amino-acid acetyltransferase NAGS1	3	218-238	Y	0	110.762	down	-	229			2	2		2	1.5681e-11	3.83444e-17
	CL6738.Contig2_All	hypothetical protein	4	596-616	Y	0	55.3812	down	-	607			1	1		4	1.8709e-06	1.14201e-08
	Unigene9685_All	L-ascorbate oxidase-like	4	718-738	Y	0	55.3812	down	-	729			1	1		4	1.8709e-06	1.14201e-08
	CL4302.Contig2_All	L-ascorbate oxidase-like	2.5	258-278	Y	0	55.3812	down	-	269			1	1		4	1.8709e-06	1.14201e-08
csn-miR397-p3	CL4302.Contig2_All	L-ascorbate oxidase-like	2	255-275	Y	0	166.144	down	-	266			3	3		4	1.4986e-16	2.32356e-25
	Unigene9685_All	L-ascorbate oxidase-like	3	715-735	Y	0	110.762	down	-	726			2	2		4	1.5681e-11	3.83444e-17
	Unigene22742_All	probable amino-acid acetyltransferase NAGS1	3	215-235	Y	0	55.3812	down	-	226			1	1	0	0	1.8709e-06	1.14201e-08
	CL6606.Contig3_All	L-ascorbate oxidase-like	3	750-770	Y	0	55.3812	down	-	761			1	1	2	0	1.8709e-06	1.14201e-08
	CL6606.Contig5_All	L-ascorbate oxidase-like	2	750-770	Y	70.3592	221.525	down	-1.65466	761	1	1	4	4	4	2	0.060613	0.0534762
csn-miR397-p5	CL4302.Contig2_All	L-ascorbate oxidase-like	2	255-275	Y	0	166.144	down	-	266			3	3	4	2	1.4986e-16	2.32356e-25
	Unigene9685_All	L-ascorbate oxidase-like	3	715-735	Y	0	110.762	down	-	726			2	2		3	1.5681e-11	3.83444e-17
	CL6606.Contig3_All	L-ascorbate oxidase-like	3	750-770	Y	0	55.3812	down	-	761			1	1		4	1.8709e-06	1.14201e-08
	Unigene22742_All	probable amino-acid acetyltransferase NAGS1	3	215-235	Y	0	55.3812	down	-	226			1	1		2	1.8709e-06	1.14201e-08
	CL6606.Contig5_All	L-ascorbate oxidase-like	2	750-770	Y	70.3592	221.525	down	-1.65466	761	1	1	4	4		2	0.060613	0.0534762
csn-miR398_2ss9CT21GC	CL10225.Contig2_All	ribosomal protein L2	4	1334-1353	Y	0	55.3812	down	-	1344			1	1		4	1.8709e-06	1.14201e-08
csn-miR399a	Unigene20241_All	probable ubiquitin-conjugating enzyme E2 24	3.5	95-115	Y	140.718	5482.74	down	-5.28402	106	2	2	99	99	4	2	0	0
csn-miR399a_1ss13AT	Unigene20241_All	probable ubiquitin-conjugating enzyme E2 24	1.5	95-115	Y	140.718	5482.74	down	-5.28402	106	2	2	99	99	1	2	0	0
csn-miR399a-3p_R+1_1ss20GC	Unigene20241_All	probable ubiquitin-conjugating enzyme E2 24	2	38-59	Y	0	1163.01	down	-	50			21	21		2	0	2.85651e-174
	Unigene9410_All	L-ascorbate oxidase-like	4	412-432	Y	0	55.3812	down	-	423			1	1		2	1.8709e-06	1.14201e-08
csn-miR399b_1ss21GA	Unigene20241_All	probable ubiquitin-conjugating enzyme E2 24	3	95-115	Y	140.718	5482.74	down	-5.28402	106	2	2	99	99		2	0	0
	CL6606.Contig5_All	L-ascorbate oxidase-like	3	441-461	Y	0	166.144	down	-	452			3	3		2	1.4986e-16	2.32356e-25
csn-miR399c_L+2R-2	CL9868.Contig3_All	NADP-dependent malic enzyme	4	1092-1112	Y	773.951	1273.77	down	-0.718789	1103	11	11	23	23	0	2	4.2187e-18	2.99335e-17
csn-miR399e	Unigene20241_All	probable ubiquitin-conjugating enzyme E2 24	1	95-115	Y	140.718	5482.74	down	-5.28402	106	2	2	99	99		4	0	0
	Unigene20241_All	probable ubiquitin-conjugating enzyme E2 24	2	95-115	Y	140.718	5482.74	down	-5.28402	106	2	2	99	99		4	0	0
csn-miR399e_1ss21GA	Unigene20241_All	probable ubiquitin-conjugating enzyme E2 24	0.5	95-115	Y	140.718	5482.74	down	-5.28402	106	2	2	99	99		4	0	0
csn-miR399i_1ss7AG	Unigene20241_All	probable ubiquitin-conjugating enzyme E2 24	4	95-115	Y	140.718	5482.74	down	-5.28402	106	2	2	99	99		4	0	0
	CL6606.Contig5_All	L-ascorbate oxidase-like	4	441-461	Y	0	166.144	down	-	452			3	3		4	1.4986e-16	2.32356e-25
csn-miR406-p3_2ss4AG18TG	Unigene30314_All	cleavage stimulation factor subunit 50	4	714-731	Y	0	27.6906	down	-	722			2	0.5		4	0.0007498	9.0674e-05
	CL3454.Contig3_All	cleavage stimulation factor subunit 50	4	1017-1034	Y	0	27.6906	down	-	1025			2	0.5		4	0.0007498	9.0674e-05
	CL3454.Contig5_All	cleavage stimulation factor subunit 50	4	620-637	Y	0	27.6906	down	-	628			2	0.5		0	0.0007498	9.0674e-05
	CL3454.Contig1_All	cleavage stimulation factor subunit 50	4	678-695	Y	0	27.6906	down	-	686			2	0.5	0	0	0.0007498	9.0674e-05
	CL95.Contig2_All	GCN5-related N-acetyltransferase	3.5	317-334	Y	0	18.4604	down	-	325			1	0.333333	1	0	0.0059205	0.00311168
	CL584.Contig5_All	GCN5-related N-acetyltransferase	3.5	1202-1219	Y	0	18.4604	down	-	1210			1	0.333333	0	0	0.0059205	0.00311168
	CL95.Contig1_All	GCN5-related N-acetyltransferase	3.5	392-409	Y	0	18.4604	down	-	400			1	0.333333	2	0	0.0059205	0.00311168
csn-miR408_L-1R+1	Unigene2009_All	serine/threonine protein phosphatase	3	706-726	Y	0	332.287	down	-	717			6	6		1	1.6737e-31	3.42636e-50
csn-miR408-p3_2ss18GT19GT	Unigene31237_All	probable serine/threonine-protein kinase At5g41260	2.5	1084-1102	Y	0	110.762	down	-	1093			2	2	2	2	1.5681e-11	3.83444e-17
	Unigene1998_CKL	cytochrome P450 734A1-like	4	1108-1126	Y	0	27.6906	down	-	1117			1	0.5	2	2	0.0007498	9.0674e-05
	CL4941.Contig4_All	cytochrome P450 734A1-like	4	1119-1137	Y	0	27.6906	down	-	1128			1	0.5		2	0.0007498	9.0674e-05
csn-miR408-p5_2ss19GT20CT	Unigene31237_All	probable serine/threonine-protein kinase At5g41260	4	1083-1102	Y	0	110.762	down	-	1093			2	2	0	0	1.5681e-11	3.83444e-17
csn-miR472-p3_2ss6TG18AG	CL2036.Contig8_All	UDP-arabinose 4-epimerase 1-like	3	329-350	Y	609.779	719.956	down	-0.239622	341	26	8.66667	39	13	0	0	2.6342e-41	4.6537e-38
	Unigene22946_All	UDP-arabinose 4-epimerase 1-like	3	239-260	Y	609.779	719.956	down	-0.239622	251	26	8.66667	39	13		2	2.6342e-41	4.6537e-38
	Unigene27053_All	UDP-arabinose 4-epimerase 1-like	3	293-314	Y	609.779	719.956	down	-0.239622	305	26	8.66667	39	13		4	2.6342e-41	4.6537e-38
csn-miR472-p3_2ss6TG18AT	Unigene22946_All	UDP-arabinose 4-epimerase 1-like	4	239-260	Y	609.779	719.956	down	-0.239622	251	26	8.66667	39	13		4	2.6342e-41	4.6537e-38
	CL2036.Contig8_All	UDP-arabinose 4-epimerase 1-like	4	329-350	Y	609.779	719.956	down	-0.239622	341	26	8.66667	39	13	4	0	2.6342e-41	4.6537e-38
	Unigene27053_All	UDP-arabinose 4-epimerase 1-like	4	293-314	Y	609.779	719.956	down	-0.239622	305	26	8.66667	39	13	0	0	2.6342e-41	4.6537e-38
csn-miR477a-p5_1ss19TG	CL9285.Contig3_All	probable linoleate 9S-lipoxygenase 5	4	1408-1428	Y	0	55.3812	down	-	1419			2	1	0	0	1.8709e-06	1.14201e-08
	CL9285.Contig2_All	probable linoleate 9S-lipoxygenase 5	4	2661-2681	Y	0	55.3812	down	-	2672			2	1	0	0	1.8709e-06	1.14201e-08
csn-miR477g-p5	CL9430.Contig1_All	signal peptidase complex catalytic subunit SEC11A-like	4	319-336	Y	0	55.3812	down	-	327			1	1	0	0	1.8709e-06	1.14201e-08
csn-miR477g-p5_1ss1CG	CL7851.Contig2_All	peroxisomal acyl-coenzyme A oxidase 1-like	4	1749-1769	Y	0	221.525	down	-	1760			4	4	0	0	1.5136e-21	8.91415e-34
csn-miR477g-p5_1ss1CT	CL2955.Contig1_All	autophagy-related protein 8f	4	429-449	Y	0	55.3812	down	-	440			1	1	0	0	1.8709e-06	1.14201e-08
csn-miR482a-3p_1ss8TG	CL1170.Contig2_All	NB-ARC domain disease resistance protein	4	706-727	Y	175.898	304.597	down	-0.792163	718	5	2.5	11	5.5	0	0	0.00028687	0.000427864
	CL270.Contig1_CKL	NB-ARC domain disease resistance protein	4	681-702	Y	175.898	304.597	down	-0.792163	693	5	2.5	11	5.5		4	0.00028687	0.000427864
csn-miR482a-3p_2ss18TC21TA	CL4692.Contig5_All	Disease resistance protein RPM1	3	835-856	Y	2392.21	3378.26	down	-0.497934	847	34	34	61	61		4	0	5.26784e-89
	Unigene22946_All	UDP-arabinose 4-epimerase 1-like	4	239-260	Y	609.779	719.956	down	-0.239622	251	26	8.66667	39	13		4	2.6342e-41	4.6537e-38
	Unigene27053_All	UDP-arabinose 4-epimerase 1-like	4	293-314	Y	609.779	719.956	down	-0.239622	305	26	8.66667	39	13		4	2.6342e-41	4.6537e-38
	CL2036.Contig8_All	UDP-arabinose 4-epimerase 1-like	4	329-350	Y	609.779	719.956	down	-0.239622	341	26	8.66667	39	13		4	2.6342e-41	4.6537e-38
	CL4692.Contig4_All	disease resistance protein RPM1-like	3	835-856	Y	457.335	664.575	down	-0.539182	847	13	6.5	24	12	2	0	7.4361e-18	1.04874e-16
	CL4692.Contig1_All	disease resistance protein RPM1-like	3	404-425	Y	457.335	664.575	down	-0.539182	416	13	6.5	24	12	2	0	7.4361e-18	1.04874e-16
	Unigene28956_All	sucrose synthase	4	159-180	Y	0	55.3812	down	-	171			1	1	2	0	1.8709e-06	1.14201e-08
csn-miR482a-5p_2ss3AG12AC	Unigene18816_All	Acetylornithine aminotransferase	3.5	158-178	Y	0	55.3812	down	-	169			1	1	2	0	1.8709e-06	1.14201e-08
	CL1841.Contig2_All	transcription factor PIF3-like	3	190-210	Y	0	13.8453	down	-	201			1	0.25	4	0	0.017152	0.0147607
	CL133.Contig1_All	uncharacterized protein LOC103980779	4	47-67	Y	30.1539	47.4696	down	-0.654659	58	3	0.428571	6	0.857143	4	0	0.058498	0.0603362
csn-miR482b-p5_2ss3TA19TA	Unigene4962_All	chaperone protein dnaJ 49-like	4	633-650	Y	0	166.144	down	-	642			3	3		2	1.4986e-16	2.32356e-25
	CL925.Contig3_All	NB-ARC domain disease resistance protein	4	287-305	Y	0	110.762	down	-	296			2	2		2	1.5681e-11	3.83444e-17
	Unigene27192_All	calcium-dependent protein kinase 8-like	2.5	740-757	Y	0	55.3812	down	-	749			2	1		2	1.8709e-06	1.14201e-08
csn-miR482b-p5_2ss9TA19AC	Unigene26049_All	ribulose-phosphate 3-epimerase	4	660-677	Y	0	55.3812	down	-	668			1	1		2	1.8709e-06	1.14201e-08
csn-miR482d-p3_2ss13CT17CT	Unigene24113_All	hypothetical protein	3	3730-3750	Y	0	110.762	down	-	3741			2	2		1	1.5681e-11	3.83444e-17
	Unigene22965_All	glutathione reductase, chloroplastic	4	272-293	Y	0	110.762	down	-	284			2	2		2	1.5681e-11	3.83444e-17
	CL1091.Contig2_All	probable galacturonosyltransferase 14	0.5	807-828	Y	0	55.3812	down	-	819			1	1		2	1.8709e-06	1.14201e-08
	Unigene22222_All	Cyclic nucleotide gated channel 1 isoform 1	4	2726-2748	Y	0	55.3812	down	-	2739			1	1		2	1.8709e-06	1.14201e-08
	Unigene42183_All	U2 small nuclear ribonucleoprotein A'	4	271-292	Y	0	27.6906	down	-	283			1	0.5		2	0.0007498	9.0674e-05
	CL571.Contig1_All	syntaxin-22-like	3.5	218-239	Y	0	27.6906	down	-	230			1	0.5	0	0	0.0007498	9.0674e-05
	Unigene24120_All	syntaxin-22-like	3.5	189-210	Y	0	27.6906	down	-	201			1	0.5		4	0.0007498	9.0674e-05
csn-miR482d-p5_2ss13CT17CT	Unigene24113_All	hypothetical protein	3	3730-3750	Y	0	110.762	down	-	3741			2	2		2	1.5681e-11	3.83444e-17
	Unigene22965_All	glutathione reductase, chloroplastic	4	272-293	Y	0	110.762	down	-	284			2	2		4	1.5681e-11	3.83444e-17
	Unigene22222_All	Cyclic nucleotide gated channel 1 isoform 1	4	2726-2748	Y	0	55.3812	down	-	2739			1	1		4	1.8709e-06	1.14201e-08
	CL1091.Contig2_All	probable galacturonosyltransferase 14	0.5	807-828	Y	0	55.3812	down	-	819			1	1		4	1.8709e-06	1.14201e-08
	Unigene24120_All	syntaxin-22-like	3.5	189-210	Y	0	27.6906	down	-	201			1	0.5		4	0.0007498	9.0674e-05
	CL571.Contig1_All	syntaxin-23-like	3.5	218-239	Y	0	27.6906	down	-	230			1	0.5		2	0.0007498	9.0674e-05
	Unigene42183_All	U2 small nuclear ribonucleoprotein A'	4	271-292	Y	0	27.6906	down	-	283			1	0.5		4	0.0007498	9.0674e-05
csn-miR482-p3_2ss8CT18TA	Unigene63230_All	hypothetical protein	3.5	39-59	Y	0	55.3812	down	-	50			1	1		4	1.8709e-06	1.14201e-08
csn-miR482-p5_2ss16CT17TC	Unigene24223_All	uncharacterized LOC101253806	3	2662-2681	Y	0	55.3812	down	-	2672			1	1		3	1.8709e-06	1.14201e-08
csn-miR529-5p	CL8990.Contig1_All	probable threonine--tRNA ligase	4	1177-1198	Y	0	55.3812	down	-	1188			1	1		4	1.8709e-06	1.14201e-08
csn-miR530a_R+1_1ss20TG	CL1720.Contig4_All	Beta-galactosidase 17	4	1650-1670	Y	0	27.6906	down	-	1661			1	0.5		2	0.0007498	9.0674e-05
	Unigene106_All	beta-galactosidase 17	4	1568-1588	Y	0	27.6906	down	-	1579			1	0.5		2	0.0007498	9.0674e-05
	CL1646.Contig1_All	armadillo repeat-containing kinesin-like protein 2	4	523-543	Y	0	18.4604	down	-	534			1	0.333333		2	0.0059205	0.00311168
csn-miR530a_R-1_1ss8GA	Unigene5131_All	beta-amylase-like	4	520-538	Y	0	55.3812	down	-	529			1	1		2	1.8709e-06	1.14201e-08
	CL1646.Contig1_All	armadillo repeat-containing kinesin-like protein 2	4	525-543	Y	0	18.4604	down	-	534			1	0.333333		4	0.0059205	0.00311168
csn-miR535a	CL3911.Contig4_All	uncharacterized LOC103401427	4	600-621	Y	246.257	844.564	down	-1.77804	611	7	3.5	31	15.25		4	2.1354e-06	1.27956e-06
	CL5803.Contig3_All	uncharacterized LOC103401427	4	1397-1418	Y	246.257	844.564	down	-1.77804	1408	7	3.5	31	15.25		4	2.1354e-06	1.27956e-06
csn-miR535a_1ss5AG	CL5803.Contig3_All	uncharacterized LOC103401427	4	1397-1418	Y	246.257	844.564	down	-1.77804	1408	7	3.5	31	15.25		3	2.1354e-06	1.27956e-06
	CL3911.Contig4_All	uncharacterized LOC103401427	4	600-621	Y	246.257	844.564	down	-1.77804	611	7	3.5	31	15.25		2	2.1354e-06	1.27956e-06
	Unigene24186_All	50S ribosomal protein L19-1	4	176-195	Y	211.077	443.05	down	-1.0697	186	3	3	8	8		2	0.073735	0.0775084
csn-miR535a_R-3	Unigene35969_All	uncharacterized LOC103401427	4	964-982	Y	351.796	609.194	down	-0.792163	972	5	5	11	11		2	2.9054e-07	5.16728e-07
	CL3767.Contig5_All	GTP-binding protein SAR1A	3.5	1338-1354	Y	0	55.3812	down	-	1345			1	1		4	1.8709e-06	1.14201e-08
	Unigene9985_All	uncharacterized LOC103401427	4	929-947	Y	0	55.3812	down	-	937			1	1		3	1.8709e-06	1.14201e-08
	CL5803.Contig3_All	uncharacterized LOC103401427	4	1400-1418	Y	246.257	844.564	down	-1.77804	1408	7	3.5	31	15.25		4	2.1354e-06	1.27956e-06
	CL3911.Contig4_All	uncharacterized LOC103401427	4	603-621	Y	246.257	844.564	down	-1.77804	611	7	3.5	31	15.25		2	2.1354e-06	1.27956e-06
	Unigene24046_All	serine/threonine-protein phosphatase PP1-like	4	744-760	Y	0	22.1525	down	-	752			2	0.4		2	0.0025712	0.000687158
	CL7473.Contig1_All	hypothetical protein	2.5	19-36	Y	70.3592	110.762	down	-0.654659	27	1	1	2	2		2	0.0038519	0.00536442
	CL5803.Contig4_All	uncharacterized LOC103401427	4	1408-1426	Y	0	13.8453	down	-	1416			1	0.25		2	0.017152	0.0147607
	CL747.Contig4_EL	uncharacterized LOC103401427	4	1143-1161	Y	0	13.8453	down	-	1151			1	0.25		4	0.017152	0.0147607
csn-miR535a-p5_2ss18AT19CT	Unigene32672_EL	chlorophyll a-b binding protein 8, chloroplastic	4	208-226	Y	844.31	1163.01	down	-0.462014	217	12	12	21	21		4	1.7311e-37	4.70593e-35
	Unigene24046_All	serine/threonine-protein phosphatase PP1-like	3	743-760	Y	0	22.1525	down	-	752			2	0.4		4	0.0025712	0.000687158
	CL7473.Contig1_All	hypothetical protein	3.5	18-36	Y	70.3592	110.762	down	-0.654659	27	1	1	2	2		3	0.0038519	0.00536442
csn-miR821b-p3_2ss15TG21AT	CL10512.Contig1_All	nuclear-pore anchor-like	4	809-830	Y	0	110.762	down	-	820			2	2		2	1.5681e-11	3.83444e-17
	CL3680.Contig3_All	26S proteasome non-ATPase regulatory subunit 1 homolog A	3.5	1197-1216	Y	0	55.3812	down	-	1207			2	1		2	1.8709e-06	1.14201e-08
	CL3680.Contig4_All	26S proteasome non-ATPase regulatory subunit 1 homolog A	3.5	1002-1021	Y	0	55.3812	down	-	1012			2	1		2	1.8709e-06	1.14201e-08
csn-miR821b-p5_2ss14TG20AT	Unigene19710_All	peroxidase 47	4	512-530	Y	0	110.762	down	-	521			2	2		4	1.5681e-11	3.83444e-17
	CL6102.Contig2_All	ribosomal RNA small subunit methyltransferase nep-1	4	474-493	Y	0	55.3812	down	-	484			1	1		3	1.8709e-06	1.14201e-08
	Unigene14775_All	casein kinase II subunit alpha-like	3.5	4-22	Y	0	55.3812	down	-	13			1	1		4	1.8709e-06	1.14201e-08
	CL2629.Contig2_All	ubiquitin-conjugating enzyme E2-23 kDa	3.5	1749-1769	Y	0	27.6906	down	-	1760			1	0.5		2	0.0007498	9.0674e-05
csn-miR821b-p5_2ss15TG21AT	CL10512.Contig1_All	nuclear-pore anchor-like	4	809-830	Y	0	110.762	down	-	820			2	2		2	1.5681e-11	3.83444e-17
	CL3680.Contig4_All	26S proteasome non-ATPase regulatory subunit 1 homolog A	3.5	1002-1021	Y	0	55.3812	down	-	1012			2	1		2	1.8709e-06	1.14201e-08
	CL3680.Contig3_All	26S proteasome non-ATPase regulatory subunit 1 homolog A	3.5	1197-1216	Y	0	55.3812	down	-	1207			2	1		4	1.8709e-06	1.14201e-08
csn-miR828a	Unigene28964_All	transcription factor MYB75	2	654-675	Y	5241.76	8251.8	down	-0.654659	666	149	74.5	298	149		4	0	1.62609e-130
	CL3426.Contig2_All	hypothetical protein	1	166-187	Y	246.257	2685.99	down	-3.44722	178	7	3.5	97	48.5		4	0	5.52099e-168
	CL3426.Contig1_All	hypothetical protein	1	419-440	Y	246.257	2685.99	down	-3.44722	431	7	3.5	97	48.5		4	0	5.52099e-168
	CL7677.Contig1_All	hypothetical protein	2	350-371	Y	5241.76	8251.8	down	-0.654659	362	149	74.5	298	149		4	0	1.62609e-130
	CL7722.Contig1_All	transcription factor MYB114-like	3	348-369	Y	0	1384.53	down	-	360			25	25		2	0	3.15511e-207
	Unigene33501_All	elongation factor 2 (EF-2, EF-TU)	3.5	457-479	Y	0	55.3812	down	-	470			1	1		2	1.8709e-06	1.14201e-08
csn-miR845d_R+3_2ss1TA19AT	Unigene30990_All	uncharacterized LOC104905624	3.5	4843-4866	Y	14.0718	77.5337	down	-2.46201	4857	1	0.2	7	1.4		4	0.0038073	0.00265878
	Unigene40848_All	uncharacterized LOC104905624	3.5	1736-1759	Y	14.0718	77.5337	down	-2.46201	1750	1	0.2	7	1.4		4	0.0038073	0.00265878
csn-miR858a_L-1R+1	CL7722.Contig1_All	transcription factor MYB114-like	3.5	315-335	Y	1196.11	6258.08	down	-2.38738	326	17	17	113	113		4	0	2.97415e-152
	Unigene1958_All	hypothetical protein	2.5	348-367	Y	3869.75	43806.6	down	-3.50083	358	55	55	791	791		2	0	0
	CL2876.Contig1_CKL	transcription factor MYB75	3.5	391-411	Y	16112.2	18940.4	down	-0.233308	402	229	229	342	342		2	0	0
	Unigene33229_All	transcription factor MYB114-like	2.5	246-265	Y	5628.73	9913.24	down	-0.816547	256	160	80	358	179	2	2	1.8898e-85	4.63137e-82
	Unigene8417_All	hypothetical protein	2.5	429-448	Y	5628.73	9913.24	down	-0.816547	439	160	80	358	179		4	1.8898e-85	4.63137e-82
	CL3417.Contig1_All	hypothetical protein	2.5	226-245	Y	3342.06	5787.34	down	-0.792163	236	95	47.5	209	104.5		2	2.0517e-56	4.49978e-54
	CL3417.Contig2_All	hypothetical protein	2.5	666-685	Y	3342.06	5787.34	down	-0.792163	676	95	47.5	209	104.5		4	2.0517e-56	4.49978e-54
	Unigene23239_All	hypothetical protein	3.5	284-304	Y	70.3592	332.287	down	-2.23962	295	1	1	6	6		4	2.8444e-07	8.27196e-08
	CL10500.Contig2_All	hypothetical protein	3.5	75-95	Y	2744.01	7254.94	down	-1.40268	86	78	39	262	131		4	0.00027524	0.000263313
	CL10500.Contig1_All	r2r3-myb transcription factor	3.5	335-355	Y	2744.01	7227.25	down	-1.39716	346	78	39	261	130.5		0	0.00053074	0.000506604
csn-miR858b_R-3	CL7722.Contig1_All	transcription factor MYB114-like	2	318-335	Y	1196.11	6258.08	down	-2.38738	326	17	17	113	113		0	0	2.97415e-152
	CL1277.Contig1_All	hypothetical protein	3.5	461-478	Y	2040.42	2685.99	down	-0.396591	469	58	29	97	48.5		0	0	9.40999e-94
	CL2876.Contig1_CKL	transcription factor MYB75	2	394-411	Y	16112.2	18940.4	down	-0.233308	402	229	229	342	342	0	0	0	0
	CL1277.Contig4_All	hypothetical protein	3.5	565-582	Y	2040.42	2685.99	down	-0.396591	573	58	29	97	48.5		2	0	9.40999e-94
	Unigene1958_All	hypothetical protein	2	350-367	Y	3869.75	43806.6	down	-3.50083	358	55	55	791	791		2	0	0
	Unigene33229_All	transcription factor MYB114-like	2	248-265	Y	5628.73	9913.24	down	-0.816547	256	160	80	358	179	4	2	1.8898e-85	4.63137e-82
	Unigene8417_All	hypothetical protein	2	431-448	Y	5628.73	9913.24	down	-0.816547	439	160	80	358	179	4	2	1.8898e-85	4.63137e-82
	CL3417.Contig1_All	hypothetical protein	2	228-245	Y	3342.06	5787.34	down	-0.792163	236	95	47.5	209	104.5		2	2.0517e-56	4.49978e-54
	CL3417.Contig2_All	hypothetical protein	2	668-685	Y	3342.06	5787.34	down	-0.792163	676	95	47.5	209	104.5		2	2.0517e-56	4.49978e-54
	Unigene23239_All	hypothetical protein	2.5	287-304	Y	70.3592	332.287	down	-2.23962	295	1	1	6	6		2	2.8444e-07	8.27196e-08
	CL7260.Contig2_All	beta-carotene hydroxylase 2	4	323-339	Y	0	55.3812	down	-	330			1	1		4	1.8709e-06	1.14201e-08
	CL10500.Contig2_All	hypothetical protein	2	78-95	Y	2744.01	7254.94	down	-1.40268	86	78	39	262	131		4	0.00027524	0.000263313
	CL10500.Contig1_All	r2r3-myb transcription factor	2	338-355	Y	2744.01	7227.25	down	-1.39716	346	78	39	261	130.5		4	0.00053074	0.000506604
	CL1439.Contig1_All	two-component response regulator-like APRR1	3.5	138-156	Y	0	27.6906	down	-	147			1	0.5		2	0.0007498	9.0674e-05
csn-miR858-p3_2ss15CG18TA	Unigene12312_All	hypothetical protein	4	1059-1075	Y	0	276.906	down	-	1066			5	5		4	1.5763e-26	5.5146e-42
	Unigene13454_All	alcohol dehydrogenase-like 7	4	34-51	Y	0	110.762	down	-	42			2	2		4	1.5681e-11	3.83444e-17
	Unigene39350_EL	hypothetical protein	4	8696-8713	Y	0	55.3812	down	-	8704			1	1	4	3	1.8709e-06	1.14201e-08
csn-miR2118e-p3_2ss13TA19CT	CL12878.Contig1_All	dolichol-phosphate mannosyltransferase subunit 1	2.5	177-195	Y	0	55.3812	down	-	186			1	1	3	3	1.8709e-06	1.14201e-08
	Unigene10946_All	cinnamoyl-CoA reductase 1-like	3.5	173-191	Y	0	55.3812	down	-	182			1	1	3	3	1.8709e-06	1.14201e-08
	CL577.Contig3_All	uncharacterized LOC100192545	3.5	140-158	Y	0	18.4604	down	-	149			1	0.333333		3	0.0059205	0.00311168
	CL9067.Contig7_All	uncharacterized LOC100192545	3.5	140-158	Y	0	18.4604	down	-	149			1	0.333333		4	0.0059205	0.00311168
	CL4633.Contig3_CKL	uncharacterized LOC100192545	3.5	140-158	Y	0	18.4604	down	-	149			1	0.333333		4	0.0059205	0.00311168
csn-miR2118e-p5_2ss8GC17GT	CL2893.Contig1_All	uncharacterized LOC104612522	3.5	596-615	Y	0	110.762	down	-	606			2	2		4	1.5681e-11	3.83444e-17
csn-miR2586a-p3_1ss13AG	CL1410.Contig2_All	ras-related protein RABE1c-like	4	366-387	Y	0	27.6906	down	-	377			1	0.5		2	0.0007498	9.0674e-05
	Unigene6053_All	glutamate synthase [NADH]	4	22-42	Y	0	27.6906	down	-	33			1	0.5		2	0.0007498	9.0674e-05
	CL2538.Contig1_All	ATPase 10	4	359-380	Y	0	15.8232	down	-	371			2	0.285714		2	0.010834	0.00526525
csn-miR2586a-p5_1ss13AG	Unigene6053_All	glutamate synthase [NADH]	4	22-42	Y	0	27.6906	down	-	33			1	0.5	4	2	0.0007498	9.0674e-05
	CL1410.Contig2_All	ras-related protein RABE1c-like	4	366-387	Y	0	27.6906	down	-	377			1	0.5		2	0.0007498	9.0674e-05
	CL2538.Contig1_All	ATPase 10	4	359-380	Y	0	15.8232	down	-	371			2	0.285714		2	0.010834	0.00526525
csn-miR2592ay-p3_2ss6AG17CG_1	Unigene40078_All	UDP-glycosyltransferase 85A1	4	778-794	Y	0	18.4604	down	-	786			1	0.333333	3	2	0.0059205	0.00311168
	CL5950.Contig4_All	UDP-glycosyltransferase 85A1	4	826-842	Y	0	18.4604	down	-	834			1	0.333333	3	2	0.0059205	0.00311168
csn-miR2592ay-p5_2ss6AG17CG_1	Unigene40078_All	UDP-glycosyltransferase 85A1	4	778-794	Y	0	18.4604	down	-	786			1	0.333333	4	2	0.0059205	0.00311168
	CL5950.Contig4_All	UDP-glycosyltransferase 85A1	4	826-842	Y	0	18.4604	down	-	834			1	0.333333		4	0.0059205	0.00311168
csn-miR2592bj-p3_1ss12TC	CL1311.Contig6_All	hypothetical protein	4	1365-1382	Y	0	83.0719	down	-	1373			3	1.5		4	5.2752e-09	5.10122e-13
	CL1311.Contig5_All	beta-glucosidase 18	4	1448-1465	Y	0	83.0719	down	-	1456			3	1.5		4	5.2752e-09	5.10122e-13
csn-miR2592bj-p3_2ss10TC17AT	CL69.Contig1_All	3-hydroxy-3-methylglutaryl-coenzyme A reductase	4	657-674	Y	0	55.3812	down	-	665			1	1		4	1.8709e-06	1.14201e-08
	Unigene5426_All	NADH dehydrogenase subunit 5	4	183-201	Y	0	55.3812	down	-	192			1	1		4	1.8709e-06	1.14201e-08
csn-miR2592bj-p3_2ss12TC19AT_1	CL1311.Contig6_All	hypothetical protein	4	1364-1382	Y	0	83.0719	down	-	1373			3	1.5		4	5.2752e-09	5.10122e-13
	CL1311.Contig5_All	beta-glucosidase 18	4	1447-1465	Y	0	83.0719	down	-	1456			3	1.5		4	5.2752e-09	5.10122e-13
csn-miR2629g-p3_2ss13TC18GA	CL3579.Contig4_All	P-glycoprotein-like	3.5	2953-2970	Y	0	110.762	down	-	2961			2	2		4	1.5681e-11	3.83444e-17
csn-miR2916-p3	Unigene11185_All	protein translocase subunit SecA	4	3248-3264	Y	0	166.144	down	-	3255			3	3	2	2	1.4986e-16	2.32356e-25
csn-miR3627a-p5_2ss7TA18TC	CL2920.Contig3_All	plasma membrane ATPase 4-like	2.5	194-214	Y	914.669	2769.06	down	-1.59808	205	13	13	50	50		2	1.2016e-08	8.5623e-09
csn-miR3630-3p_L-2_1ss22CT	CL2510.Contig3_All	long chain base biosynthesis protein 2a-like	3.5	1199-1218	Y	0	110.762	down	-	1209			2	2		2	1.5681e-11	3.83444e-17
csn-miR3630-3p_L-3_1ss22CA	CL1761.Contig4_All	cAMP-regulated phosphoprotein 21-like	4	744-761	Y	0	110.762	down	-	753			2	2		2	1.5681e-11	3.83444e-17
csn-miR3630-3p_L-3_1ss22CT	CL882.Contig1_All	UBX domain-containing protein 6	4	2546-2563	Y	35.1796	138.453	down	-1.97659	2555	1	0.5	5	2.5		4	0.010394	0.00937277
csn-miR3633a-3p_R-3_1ss7TA	Unigene1486_EL	thioredoxin reductase NTRA-like	4	402-421	Y	0	55.3812	down	-	411			1	1		4	1.8709e-06	1.14201e-08
	CL11925.Contig1_All	Nbs-lrr resistance protein	3	726-744	Y	0	13.8453	down	-	735			1	0.25		4	0.017152	0.0147607
	CL11925.Contig2_All	Nbs-lrr resistance protein	3	736-754	Y	0	13.8453	down	-	745			1	0.25		4	0.017152	0.0147607
	CL311.Contig2_EL	Nbs-lrr resistance protein	3	749-767	Y	0	13.8453	down	-	758			1	0.25	2	2	0.017152	0.0147607
	Unigene5993_All	probable disease resistance RPP8-like protein 2	3	225-243	Y	0	13.8453	down	-	234			1	0.25	4	2	0.017152	0.0147607
csn-miR4376_R-3_1ss18CT	CL2920.Contig3_All	plasma membrane ATPase 4-like	3	194-212	Y	140.718	1661.44	down	-3.56155	203	2	2	30	30	3	2	4.18e-88	1.04103e-110
csn-miR4995_L+1R-4	CL7576.Contig2_All	gibberellin 3-beta hydroxylase	4	307-325	Y	0	36.9208	down	-	315			6	0.666667	4	2	9.9363e-05	4.43161e-06
csn-miR5048a_L+2R-2	Unigene31553_All	calcium-dependent protein kinase 26-like	3.5	837-858	Y	0	55.3812	down	-	849			1	1	4	3	1.8709e-06	1.14201e-08
csn-miR5072_L-4_1ss12CT	CL8138.Contig1_All	splicing factor U2af large subunit A	4	418-435	Y	0	166.144	down	-	426			3	3	3	3	1.4986e-16	2.32356e-25
	Unigene5292_All	hypothetical protein	3	253-270	Y	0	110.762	down	-	261			2	2	3	3	1.5681e-11	3.83444e-17
	CL2617.Contig1_All	importin subunit beta-1	3.5	1040-1057	Y	0	55.3812	down	-	1048			1	1		3	1.8709e-06	1.14201e-08
csn-miR5225a-p5_2ss7GA19CT	CL2920.Contig3_All	plasma membrane ATPase 4-like	3.5	193-212	Y	140.718	1661.44	down	-3.56155	203	2	2	30	30		4	4.18e-88	1.04103e-110
csn-miR5267c-p3_2ss2AT17AG	Unigene22524_All	armadillo repeat-containing kinesin-like protein 1	4	1864-1882	Y	0	110.762	down	-	1873			2	2		4	1.5681e-11	3.83444e-17
csn-miR5303j-p5_2ss10GT17CT	CL2267.Contig3_All	hypothetical protein	2.5	264-281	Y	0	55.3812	down	-	272			1	1		4	1.8709e-06	1.14201e-08
	CL2968.Contig3_All	probable receptor-like protein kinase At5g39020-like	4	1696-1714	Y	0	55.3812	down	-	1705			1	1		2	1.8709e-06	1.14201e-08
	Unigene2176_All	(-)-a-terpineol synthase	4	297-313	Y	0	55.3812	down	-	304			1	1		2	1.8709e-06	1.14201e-08
	Unigene17005_All	proteasome subunit alpha type-7-like	4	885-902	Y	0	27.6906	down	-	893			1	0.5		2	0.0007498	9.0674e-05
csn-miR5368_L-2R+1	Unigene41537_CKL	cathepsin L1-like	3	2015-2031	Y	0	110.762	down	-	2022			2	2	4	2	1.5681e-11	3.83444e-17
csn-miR5368-p3	Unigene41537_CKL	cathepsin L1-like	3.5	2014-2030	Y	0	55.3812	down	-	2021			1	1		2	1.8709e-06	1.14201e-08
	CL786.Contig6_All	hypothetical protein	3.5	1848-1864	Y	20.1026	35.6022	down	-0.824584	1855	2	0.285714	2	0.642857		2	0.25039	0.302868
csn-miR5368-p3_1ss16AG	CL9140.Contig2_All	cytidine deaminase 1	3.5	818-834	Y	0	55.3812	down	-	826			1	1	3	2	1.8709e-06	1.14201e-08
	CL1729.Contig2_All	uncharacterized LOC100249372	4	87-103	Y	0	27.6906	down	-	94			1	0.5	3	2	0.0007498	9.0674e-05
csn-miR5368-p3_1ss17CT	CL9521.Contig1_All	calnexin homolog	3	1440-1458	Y	598.053	692.266	down	-0.211052	1449	17	8.5	25	12.5	4	2	2.0283e-42	4.66288e-39
	CL2898.Contig3_All	calnexin homolog	3	1447-1465	Y	598.053	692.266	down	-0.211052	1456	17	8.5	25	12.5		4	2.0283e-42	4.66288e-39
	Unigene9277_All	ran-binding dexh-box helicase	3	2284-2302	Y	0	55.3812	down	-	2293			1	1		4	1.8709e-06	1.14201e-08
csn-miR5368-p3_2ss14TC17CT	CL12136.Contig2_All	chromatin remodeling complex / DNA-dep ATPase	4	2119-2137	Y	0	55.3812	down	-	2128			1	1		4	1.8709e-06	1.14201e-08
	CL6851.Contig3_All	auxin-responsive protein IAA27	4	1140-1157	Y	0	41.5359	down	-	1148			3	0.75		4	3.6554e-05	1.05108e-06
	CL6851.Contig5_All	auxin-responsive protein IAA27	4	1207-1224	Y	0	41.5359	down	-	1215			3	0.75		4	3.6554e-05	1.05108e-06
	CL453.Contig7_All	auxin-responsive protein IAA27-like	4	1375-1392	Y	0	41.5359	down	-	1383			3	0.75		4	3.6554e-05	1.05108e-06
	CL6851.Contig2_All	Phytochrome-associated protein 2 isoform 1	4	1083-1100	Y	0	41.5359	down	-	1091			3	0.75		4	3.6554e-05	1.05108e-06
	CL5395.Contig4_All	6-phosphofructo-2-kinase/fructose-2	4	672-688	Y	0	13.8453	down	-	679			1	0.25		4	0.017152	0.0147607
	CL5395.Contig5_All	6-phosphofructo-2-kinase/fructose-2	4	672-688	Y	0	13.8453	down	-	679			1	0.25	2	2	0.017152	0.0147607
	CL6584.Contig7_All	6-phosphofructo-2-kinase/fructose-2	4	671-687	Y	0	13.8453	down	-	678			1	0.25		2	0.017152	0.0147607
	CL5395.Contig1_All	6-phosphofructo-2-kinase/fructose-2	4	672-688	Y	0	13.8453	down	-	679			1	0.25		2	0.017152	0.0147607
	Unigene3732_All	probable inactive shikimate kinase like 1	3.5	103-120	Y	70.3592	166.144	down	-1.23962	111	1	1	3	3		2	0.82404	0.830138
csn-miR5368-p5_1ss15AG	Unigene32101_All	protein SMG7	4	2660-2678	Y	0	55.3812	down	-	2669			1	1		4	1.8709e-06	1.14201e-08
csn-miR5368-p5_1ss3TC	Unigene36937_EL	hypothetical protein	3.5	894-912	Y	0	166.144	down	-	903			3	3		4	1.4986e-16	2.32356e-25
	CL2998.Contig2_All	Leucine-rich repeat protein kinase family protein	4	750-768	Y	70.3592	332.287	down	-2.23962	759	1	1	6	6		4	2.8444e-07	8.27196e-08
csn-miR5368-p5_1ss4TC	CL2998.Contig2_All	Leucine-rich repeat protein kinase family protein	4	750-769	Y	211.077	387.669	down	-0.877051	760	3	3	7	7		4	0.00090351	0.0011827
csn-miR5368-p5_2ss15TC18CT	Unigene5189_All	disease resistance protein RPM1-like	4	1593-1611	Y	0	387.669	down	-	1602			7	7	2	2	1.801e-36	2.30452e-58
	CL3167.Contig2_All	DNAJ	3	9-26	Y	0	221.525	down	-	17			4	4	4	2	1.5136e-21	8.91415e-34
	Unigene3732_All	probable inactive shikimate kinase like 1	4	104-121	Y	0	110.762	down	-	112			2	2	3	2	1.5681e-11	3.83444e-17
	CL3895.Contig6_CKL	peptidase	3.5	1711-1728	Y	0	110.762	down	-	1719			2	2	4	2	1.5681e-11	3.83444e-17
	CL2968.Contig3_All	probable receptor-like protein kinase At5g39020-like	3.5	1194-1211	Y	0	55.3812	down	-	1202			1	1		4	1.8709e-06	1.14201e-08
	Unigene20744_CKL	hydrolase	3.5	315-331	Y	0	55.3812	down	-	322			1	1		4	1.8709e-06	1.14201e-08
	CL1886.Contig3_All	serine/threonine protein kinase isoform 1	4	321-338	Y	0	27.6906	down	-	329			1	0.5		2	0.0007498	9.0674e-05
	CL3828.Contig2_All	dead box ATP-dependent RNA helicase	3	1148-1165	Y	70.3592	110.762	down	-0.654659	1156	1	1	2	2		4	0.0038519	0.00536442
csn-miR6149a_L-2R-1_1ss3GC	Unigene4859_All	pentatricopeptide repeat-containing protein At2g04860	4	31-47	Y	0	55.3812	down	-	38			1	1		4	1.8709e-06	1.14201e-08
csn-miR6149a-p5_2ss18CT21TA	Unigene10664_All	Phenylalanyl-tRNA synthetase class IIc family protein	3	121-141	Y	0	110.762	down	-	132			2	2		4	1.5681e-11	3.83444e-17
csn-miR6173-p3_1ss4CT	CL7753.Contig2_CKL	clathrin interactor EPSIN 1	4	752-770	Y	0	55.3812	down	-	761			1	1		4	1.8709e-06	1.14201e-08
	Unigene9124_All	mitogen-activated protein kinase kinase kinase 1-like	3	2373-2392	Y	0	55.3812	down	-	2383			3	1		4	1.8709e-06	1.14201e-08
csn-miR6300_1ss1GT	CL7931.Contig2_All	Charged multivesicular body protein 2a	4	890-906	Y	773.951	775.337	down	-0.00258235	897	11	11	14	14		4	4.3439e-73	1.8088e-66
	Unigene7694_CKL	tubulin beta chain	4	215-233	Y	0	166.144	down	-	224			3	3		2	1.4986e-16	2.32356e-25
csn-miR6300-p3_1ss10AG	CL4757.Contig4_All	hypothetical protein	2	390-408	Y	0	55.3812	down	-	399			1	1		4	1.8709e-06	1.14201e-08
	CL3704.Contig1_All	ribonucleoprotein At2g37220	4	380-397	Y	0	55.3812	down	-	388			1	1	1	0	1.8709e-06	1.14201e-08
csn-miR6478_1ss21GA	CL11553.Contig3_All	50S ribosomal protein L12	3.5	642-663	Y	0	110.762	down	-	654			2	2	0	0	1.5681e-11	3.83444e-17
csn-miR6478_R-1	CL11553.Contig3_All	50S ribosomal protein L12	2.5	643-663	Y	0	110.762	down	-	654			2	2	0	0	1.5681e-11	3.83444e-17
csn-miR7733-p3_2ss12CT17CA	CL2670.Contig1_All	auxin response factor 9	4	100-118	Y	0	55.3812	down	-	109			2	1		1	1.8709e-06	1.14201e-08
csn-miR7733-p5_2ss12CT17CA	CL2670.Contig1_All	auxin response factor 9	4	100-118	Y	0	55.3812	down	-	109			2	1	0	0	1.8709e-06	1.14201e-08
csn-miR7972_1ss9CG	CL278.Contig4_All	hypothetical protein	2	1147-1167	Y	117.265	516.892	down	-2.14009	1158	5	1.66667	28	9.33333		4	4.1405e-09	9.85794e-10
	CL278.Contig5_All	putative DNA glycosylase At3g47830	2	1143-1163	Y	117.265	516.892	down	-2.14009	1154	5	1.66667	28	9.33333		2	4.1405e-09	9.85794e-10
	Unigene24261_All	hypothetical protein	4	64-83	Y	0	55.3812	down	-	74			1	1		2	1.8709e-06	1.14201e-08
	CL5731.Contig5_All	elongation factor 1-alpha	4	677-697	Y	70.3592	110.762	down	-0.654659	688	1	1	2	2		3	0.0038519	0.00536442
csn-miR8005a-p3_1ss12AG	CL7931.Contig2_All	Charged multivesicular body protein 2a	4	377-396	Y	211.077	276.906	down	-0.391625	388	6	3	10	5		2	5.647e-12	3.3207e-11
	Unigene36217_All	Beta-galactosidase 17	4	327-346	Y	0	55.3812	down	-	337			1	1		2	1.8709e-06	1.14201e-08
	Unigene6592_All	calcium-binding allergen Ole e 8-like	4	121-140	Y	0	55.3812	down	-	132			1	1		2	1.8709e-06	1.14201e-08
	CL7374.Contig1_CKL	nuclear pore complex protein NUP107	3.5	2-22	Y	0	55.3812	down	-	13			1	1		2	1.8709e-06	1.14201e-08
	Unigene15227_All	D-type cyclin family 3 subgroup 1	3.5	77-96	Y	0	55.3812	down	-	88			1	1		2	1.8709e-06	1.14201e-08
	CL7930.Contig2_All	uncharacterized protein LOC103984394	4	520-539	Y	0	27.6906	down	-	530			1	0.5		2	0.0007498	9.0674e-05
	CL2982.Contig1_All	ent-copalyl diphosphate synthase	3.5	209-229	Y	0	27.6906	down	-	220			1	0.5		2	0.0007498	9.0674e-05
	Unigene2228_All	uncharacterized protein LOC103984394	4	285-304	Y	0	27.6906	down	-	295			1	0.5		4	0.0007498	9.0674e-05
	Unigene1986_All	small nuclear ribonucleoprotein Sm D2	3.5	114-133	Y	0	27.6906	down	-	125			1	0.5		4	0.0007498	9.0674e-05
	CL5371.Contig3_All	small nuclear ribonucleoprotein Sm D2	3.5	95-114	Y	0	27.6906	down	-	106			1	0.5		3	0.0007498	9.0674e-05
csn-miR8005a-p5_1ss11AG	CL7931.Contig2_All	Charged multivesicular body protein 2a	4	203-222	Y	0	332.287	down	-	213			6	6		2	1.6737e-31	3.42636e-50
	Unigene33377_All	omega-hydroxypalmitate O-feruloyl transferase	4	602-621	Y	0	276.906	down	-	613			5	5		4	1.5763e-26	5.5146e-42
	Unigene28909_CKL	magnesium protoporphyrin IX methyltransferase	4	87-106	Y	0	110.762	down	-	97			2	2		2	1.5681e-11	3.83444e-17
	CL10590.Contig1_All	nucleoside diphosphate kinase	3.5	27-48	Y	0	83.0719	down	-	39			3	1.5		2	5.2752e-09	5.10122e-13
	Unigene36217_All	Beta-galactosidase 17	3	326-345	Y	0	55.3812	down	-	336			1	1		2	1.8709e-06	1.14201e-08
	CL10065.Contig2_All	uncharacterized LOC100246602	3	74-94	Y	0	27.6906	down	-	85			1	0.5		2	0.0007498	9.0674e-05
	Unigene34046_EL	U3 small nucleolar ribonucleoprotein protein IMP4	3	74-94	Y	0	27.6906	down	-	85			1	0.5		2	0.0007498	9.0674e-05
csn-miR8005c-p3_1ss12AG	CL7931.Contig2_All	Charged multivesicular body protein 2a	4	377-396	Y	211.077	276.906	down	-0.391625	388	6	3	10	5		2	5.647e-12	3.3207e-11
	Unigene15227_All	D-type cyclin family 3 subgroup 1	3.5	77-96	Y	0	55.3812	down	-	88			1	1		2	1.8709e-06	1.14201e-08
	Unigene36217_All	Beta-galactosidase 17	4	327-346	Y	0	55.3812	down	-	337			1	1		4	1.8709e-06	1.14201e-08
	Unigene6592_All	calcium-binding allergen Ole e 8-like	4	121-140	Y	0	55.3812	down	-	132			1	1		4	1.8709e-06	1.14201e-08
	CL7374.Contig1_CKL	nuclear pore complex protein NUP107	3.5	2-22	Y	0	55.3812	down	-	13			1	1		4	1.8709e-06	1.14201e-08
	CL2982.Contig1_All	ent-copalyl diphosphate synthase	3.5	209-229	Y	0	27.6906	down	-	220			1	0.5		4	0.0007498	9.0674e-05
	Unigene1986_All	small nuclear ribonucleoprotein Sm D2	3.5	114-133	Y	0	27.6906	down	-	125			1	0.5	4	2	0.0007498	9.0674e-05
	Unigene2228_All	uncharacterized protein LOC103984394	4	285-304	Y	0	27.6906	down	-	295			1	0.5		2	0.0007498	9.0674e-05
	CL5371.Contig3_All	small nuclear ribonucleoprotein Sm D2	3.5	95-114	Y	0	27.6906	down	-	106			1	0.5		4	0.0007498	9.0674e-05
	CL7930.Contig2_All	uncharacterized protein LOC103984394	4	520-539	Y	0	27.6906	down	-	530			1	0.5		4	0.0007498	9.0674e-05
csn-miR8175_L-2	CL1175.Contig1_All	hypothetical protein	4	54-71	Y	0	55.3812	down	-	62			1	1		2	1.8709e-06	1.14201e-08
csn-miR8651-p3_2ss17AC20TA	CL1950.Contig1_EL	uncharacterized LOC104808371	4	210-230	Y	0	55.3812	down	-	221			1	1		2	1.8709e-06	1.14201e-08
csn-miR8651-p5_2ss17AC20TA	CL1950.Contig1_EL	uncharacterized LOC104808371	4	210-230	Y	0	55.3812	down	-	221			1	1		2	1.8709e-06	1.14201e-08
csn-miR8757b-p3_1ss18GC	CL2285.Contig1_All	allene oxide cyclase 4	3.5	362-380	Y	0	18.4604	down	-	371			1	0.333333		2	0.0059205	0.00311168
	CL1977.Contig1_All	E3 ubiquitin-protein ligase COP1-like	4	826-844	Y	23.4531	55.3812	down	-1.23962	835	1	0.333333	3	1		2	0.89785	0.901528
csn-miR8757b-p5_1ss17GC	CL7162.Contig3_All	hypothetical protein	3.5	240-257	Y	0	110.762	down	-	248			2	2		2	1.5681e-11	3.83444e-17
	CL4451.Contig1_All	non-specific phospholipase C6-like	4	272-290	Y	0	110.762	down	-	281			2	2		2	1.5681e-11	3.83444e-17
	CL2566.Contig2_All	L-aminoadipate-semialdehyde dehydrogenase-phosphopantetheinyl transferase-like	4	756-773	Y	0	55.3812	down	-	764			2	1	0	0	1.8709e-06	1.14201e-08
	CL1977.Contig1_All	E3 ubiquitin-protein ligase COP1-like	4	826-843	Y	0	55.3812	down	-	834			3	1	0	0	1.8709e-06	1.14201e-08
	CL2285.Contig1_All	allene oxide cyclase 4	4	362-379	Y	23.4531	92.3021	down	-1.97659	370	1	0.333333	5	1.66667	2	2	0.036419	0.0311171
csn-miR8757b-p5_1ss18GC	CL1147.Contig3_All	NADP-dependent malic enzyme-like	3.5	433-450	Y	0	27.6906	down	-	441			1	0.5		2	0.0007498	9.0674e-05
	CL2285.Contig1_All	allene oxide cyclase 4	3.5	363-380	Y	0	18.4604	down	-	371			1	0.333333		0	0.0059205	0.00311168
	CL6411.Contig1_EL	glycine-rich RNA-binding	3.5	313-330	Y	35.1796	55.3812	down	-0.654659	321	1	0.5	2	1	2	0	0.040999	0.0479952
	CL6411.Contig2_EL	glycine-rich RNA-binding protein RZ1C-like	3.5	313-330	Y	35.1796	55.3812	down	-0.654659	321	1	0.5	2	1	2	0	0.040999	0.0479952
	CL1977.Contig1_All	E3 ubiquitin-protein ligase COP1-like	3	827-844	Y	23.4531	55.3812	down	-1.23962	835	1	0.333333	3	1	2	0	0.89785	0.901528
csn-miR8757b-p5_1ss1TG	Unigene2446_All	4-hydroxy-3-methylbut-2-en-1-yl diphosphate synthase (ferredoxin)	3.5	80-96	Y	0	166.144	down	-	88			3	3	4	0	1.4986e-16	2.32356e-25
	CL1977.Contig1_All	E3 ubiquitin-protein ligase COP1-like	2	828-845	Y	0	110.762	down	-	836			6	2	4	2	1.5681e-11	3.83444e-17
	CL6322.Contig2_All	V-type proton ATPase subunit a3	4	643-660	Y	0	55.3812	down	-	651			1	1		2	1.8709e-06	1.14201e-08
	Unigene31213_All	catalase isozyme 1	4	3266-3283	Y	70.3592	276.906	down	-1.97659	3274	2	1	10	5		4	0.00029016	0.000187353
	Unigene25971_All	anthranilate synthase alpha subunit 1	3.5	260-277	Y	70.3592	221.525	down	-1.65466	268	1	1	4	4		0	0.060613	0.0534762
csn-miR8757b-p5_2ss1TG19GC	CL1977.Contig1_All	E3 ubiquitin-protein ligase COP1-like	3	826-845	Y	0	110.762	down	-	836			6	2	4	0	1.5681e-11	3.83444e-17
csn-miR894_L-3R+1	Unigene15249_All	hypothetical protein	4	579-597	Y	0	55.3812	down	-	588			1	1		0	1.8709e-06	1.14201e-08
csn-miR9777-p3_2ss4CT17TA	Unigene14119_All	two-component response regulator ARR12-like	3.5	998-1016	Y	0	110.762	down	-	1007			2	2	0	0	1.5681e-11	3.83444e-17
	Unigene13524_All	probable fructose-bisphosphate aldolase 3	4	1774-1791	Y	0	110.762	down	-	1782			2	2	4	2	1.5681e-11	3.83444e-17
csn-miR9863a-3p_1ss9TC	CL9852.Contig4_All	cationic peroxidase 1-like	4	592-612	Y	0	55.3812	down	-	603			2	1		4	1.8709e-06	1.14201e-08
	CL1454.Contig1_All	cationic peroxidase 1-like	4	596-616	Y	0	55.3812	down	-	607			2	1		4	1.8709e-06	1.14201e-08
	Unigene22921_All	hypothetical protein	3.5	768-788	Y	0	55.3812	down	-	779			1	1		4	1.8709e-06	1.14201e-08
