# Supplementary material for: Identification of Regulatory Networks of MicroRNAs and Their Targets in Response to Colletotrichum gloeosporioides in Tea Plant (Camellia sinensis L.)
Source: Front Plant Sci. 2019 Sep 12;10:1096. doi: 10.3389/fpls.2019.01096 (PMC6751461; doi:10.3389/fpls.2019.01096)
Supplement: Supplementary file 8 [file Table_8.xls]

## Sheet: GO
Table S8: Gene Ontology analysis of the potential target genes of the identified miRNAs in Camellia sinensis.
miRNA	Transcript_ID	GO_Term	GO_Function	GO_term	pvalue (fisher_exact_test)
csn-miR828a	CL10500.Contig1_All	GO:0006351	biological_process	transcription, DNA-templated	0
csn-miR828a	CL10500.Contig1_All	GO:0006355	biological_process	regulation of transcription, DNA-templated	0
csn-miR828a	CL10500.Contig1_All	GO:0045165	biological_process	cell fate commitment	0
csn-miR828a	CL10500.Contig1_All	GO:0045893	biological_process	positive regulation of transcription, DNA-templated	0
csn-miR828a	CL10500.Contig1_All	GO:0048765	biological_process	root hair cell differentiation	0
csn-miR162a_R+1	CL11508.Contig2_All	GO:0030422	biological_process	production of siRNA involved in RNA interference	9.50821e-198
csn-miR166d-p5_2ss10CG20AC	CL4378.Contig1_All	GO:0008150	biological_process	biological_process	1.19613e-98
csn-miR828a	Unigene28964_All	GO:0006351	biological_process	transcription, DNA-templated	1.62609e-130
csn-miR828a	Unigene28964_All	GO:0006355	biological_process	regulation of transcription, DNA-templated	1.62609e-130
csn-miR828a	Unigene28964_All	GO:0009651	biological_process	response to salt stress	1.62609e-130
csn-miR828a	Unigene28964_All	GO:0009723	biological_process	response to ethylene	1.62609e-130
csn-miR828a	Unigene28964_All	GO:0009733	biological_process	response to auxin	1.62609e-130
csn-miR828a	Unigene28964_All	GO:0009813	biological_process	flavonoid biosynthetic process	1.62609e-130
csn-miR828a	Unigene28964_All	GO:0045893	biological_process	positive regulation of transcription, DNA-templated	1.62609e-130
PC-3p-129106_12	Unigene17777_All	GO:0006897	biological_process	endocytosis	4.19821e-95
PC-3p-129106_12	Unigene17777_All	GO:0008150	biological_process	biological_process	4.19821e-95
PC-3p-129106_12	Unigene17777_All	GO:0008360	biological_process	regulation of cell shape	4.19821e-95
PC-3p-129106_12	Unigene17777_All	GO:0016055	biological_process	Wnt signaling pathway	4.19821e-95
PC-3p-129106_12	Unigene17777_All	GO:0018105	biological_process	peptidyl-serine phosphorylation	4.19821e-95
csn-miR394a_R-1_1ss21AT	CL4539.Contig1_All	GO:0010305	biological_process	leaf vascular tissue pattern formation	1.0711e-100
csn-miR394a_R-1_1ss21AT	CL4539.Contig1_All	GO:0010928	biological_process	regulation of auxin mediated signaling pathway	1.0711e-100
csn-miR394a_R-1_1ss21AT	CL4539.Contig1_All	GO:0031146	biological_process	SCF-dependent proteasomal ubiquitin-dependent protein catabolic process	1.0711e-100
csn-miR394a_R-1_1ss21AT	CL4539.Contig1_All	GO:0060776	biological_process	simple leaf morphogenesis	1.0711e-100
csn-miR160c-p5_2ss13AG17AG	Unigene15328_All	GO:0008150	biological_process	biological_process	7.14416e-114
csn-miR394b	CL4539.Contig2_All	GO:0010305	biological_process	leaf vascular tissue pattern formation	1.0711e-100
csn-miR394b	CL4539.Contig2_All	GO:0010928	biological_process	regulation of auxin mediated signaling pathway	1.0711e-100
csn-miR394b	CL4539.Contig2_All	GO:0031146	biological_process	SCF-dependent proteasomal ubiquitin-dependent protein catabolic process	1.0711e-100
csn-miR394b	CL4539.Contig2_All	GO:0060776	biological_process	simple leaf morphogenesis	1.0711e-100
csn-miR394a_R-2	CL4539.Contig1_All	GO:0010305	biological_process	leaf vascular tissue pattern formation	1.0711e-100
csn-miR394a_R-2	CL4539.Contig1_All	GO:0010928	biological_process	regulation of auxin mediated signaling pathway	1.0711e-100
csn-miR394a_R-2	CL4539.Contig1_All	GO:0031146	biological_process	SCF-dependent proteasomal ubiquitin-dependent protein catabolic process	1.0711e-100
csn-miR394a_R-2	CL4539.Contig1_All	GO:0060776	biological_process	simple leaf morphogenesis	1.0711e-100
csn-miR397a_1ss10GC	CL2705.Contig1_All	GO:0046686	biological_process	response to cadmium ion	2.5491e-81
PC-3p-166817_9	Unigene17777_All	GO:0006897	biological_process	endocytosis	4.19821e-95
PC-3p-166817_9	Unigene17777_All	GO:0008150	biological_process	biological_process	4.19821e-95
PC-3p-166817_9	Unigene17777_All	GO:0008360	biological_process	regulation of cell shape	4.19821e-95
PC-3p-166817_9	Unigene17777_All	GO:0016055	biological_process	Wnt signaling pathway	4.19821e-95
PC-3p-166817_9	Unigene17777_All	GO:0018105	biological_process	peptidyl-serine phosphorylation	4.19821e-95
csn-miR319a	CL13487.Contig3_All	GO:0006351	biological_process	transcription, DNA-templated	0
csn-miR319a	CL13487.Contig3_All	GO:0006355	biological_process	regulation of transcription, DNA-templated	0
csn-miR319a	CL13487.Contig3_All	GO:0009793	biological_process	embryo development ending in seed dormancy	0
csn-miR319a	CL13487.Contig3_All	GO:0009965	biological_process	leaf morphogenesis	0
csn-miR319a	CL13487.Contig3_All	GO:0030154	biological_process	cell differentiation	0
csn-miR319a	CL13487.Contig3_All	GO:0045962	biological_process	positive regulation of development, heterochronic	0
csn-miR319a	CL13487.Contig3_All	GO:0048366	biological_process	leaf development	0
csn-miR172d_L-2R+1	Unigene48_All	GO:0006351	biological_process	transcription, DNA-templated	1.27087e-272
csn-miR172d_L-2R+1	Unigene48_All	GO:0006355	biological_process	regulation of transcription, DNA-templated	1.27087e-272
csn-miR172d_L-2R+1	Unigene48_All	GO:0009908	biological_process	flower development	1.27087e-272
csn-miR172d_L-2R+1	Unigene48_All	GO:0010073	biological_process	meristem maintenance	1.27087e-272
csn-miR172d_L-2R+1	Unigene48_All	GO:0010093	biological_process	specification of floral organ identity	1.27087e-272
csn-miR172d_L-2R+1	Unigene48_All	GO:0019953	biological_process	sexual reproduction	1.27087e-272
csn-miR172d_L-2R+1	Unigene48_All	GO:0030154	biological_process	cell differentiation	1.27087e-272
csn-miR172d_L-2R+1	Unigene48_All	GO:0048316	biological_process	seed development	1.27087e-272
csn-miR172d_L-2R+1	Unigene48_All	GO:0048481	biological_process	plant ovule development	1.27087e-272
csn-miR5048a_L+2R-2	CL4024.Contig1_All	GO:0006355	biological_process	regulation of transcription, DNA-templated	7.14416e-114
csn-miR5048a_L+2R-2	CL4024.Contig1_All	GO:0035556	biological_process	intracellular signal transduction	7.14416e-114
csn-miR4995_L+1R-4	Unigene19994_All	GO:0009657	biological_process	plastid organization	7.39702e-99
PC-3p-16621_113	Unigene39748_CKL	GO:0009809	biological_process	lignin biosynthetic process	7.14416e-114
PC-3p-16621_113	Unigene39748_CKL	GO:0055114	biological_process	oxidation-reduction process	7.14416e-114
csn-miR858b_R-3	CL7722.Contig1_All	GO:0006351	biological_process	transcription, DNA-templated	2.97415e-152
csn-miR858b_R-3	CL7722.Contig1_All	GO:0007275	biological_process	multicellular organism development	2.97415e-152
csn-miR858b_R-3	CL7722.Contig1_All	GO:0010026	biological_process	trichome differentiation	2.97415e-152
csn-miR858b_R-3	CL7722.Contig1_All	GO:0045893	biological_process	positive regulation of transcription, DNA-templated	2.97415e-152
csn-miR2592bj-p3_1ss12TC	CL4961.Contig2_EL	GO:0009738	biological_process	abscisic acid-activated signaling pathway	1.1813e-302
csn-miR2592bj-p3_1ss12TC	CL4961.Contig2_EL	GO:0080163	biological_process	regulation of protein serine/threonine phosphatase activity	1.1813e-302
csn-miR169k_R-1_2ss18CT20GC	CL531.Contig2_All	GO:0006351	biological_process	transcription, DNA-templated	5.37047e-136
csn-miR169k_R-1_2ss18CT20GC	CL531.Contig2_All	GO:0006355	biological_process	regulation of transcription, DNA-templated	5.37047e-136
csn-miR166a_R+2_3	CL6740.Contig4_All	GO:0006351	biological_process	transcription, DNA-templated	4.79191e-125
csn-miR166a_R+2_3	CL6740.Contig4_All	GO:0006355	biological_process	regulation of transcription, DNA-templated	4.79191e-125
csn-miR166a_R+2_3	CL6740.Contig4_All	GO:0009855	biological_process	determination of bilateral symmetry	4.79191e-125
csn-miR166a_R+2_3	CL6740.Contig4_All	GO:0009944	biological_process	polarity specification of adaxial/abaxial axis	4.79191e-125
csn-miR166a_R+2_3	CL6740.Contig4_All	GO:0009956	biological_process	radial pattern formation	4.79191e-125
csn-miR166a_R+2_3	CL6740.Contig4_All	GO:0010014	biological_process	meristem initiation	4.79191e-125
csn-miR166a_R+2_3	CL6740.Contig4_All	GO:0010051	biological_process	xylem and phloem pattern formation	4.79191e-125
csn-miR166a_R+2_3	CL6740.Contig4_All	GO:0010089	biological_process	xylem development	4.79191e-125
csn-miR166a_R+2_3	CL6740.Contig4_All	GO:0030154	biological_process	cell differentiation	4.79191e-125
csn-miR164a-p5_2ss15CG18CG	CL1252.Contig1_All	GO:0006952	biological_process	defense response	2.32248e-185
csn-miR164a-p5_2ss15CG18CG	CL1252.Contig1_All	GO:0009626	biological_process	plant-type hypersensitive response	2.32248e-185
csn-miR164a-p5_2ss15CG18CG	CL1252.Contig1_All	GO:0016045	biological_process	detection of bacterium	2.32248e-185
csn-miR164a-p5_2ss15CG18CG	CL1252.Contig1_All	GO:0042742	biological_process	defense response to bacterium	2.32248e-185
csn-miR167k_R-3_1ss9CT	CL6842.Contig1_All	GO:0006351	biological_process	transcription, DNA-templated	1.29141e-151
csn-miR167k_R-3_1ss9CT	CL6842.Contig1_All	GO:0006355	biological_process	regulation of transcription, DNA-templated	1.29141e-151
csn-miR167k_R-3_1ss9CT	CL6842.Contig1_All	GO:0009611	biological_process	response to wounding	1.29141e-151
csn-miR167k_R-3_1ss9CT	CL6842.Contig1_All	GO:0009733	biological_process	response to auxin	1.29141e-151
csn-miR167k_R-3_1ss9CT	CL6842.Contig1_All	GO:0009734	biological_process	auxin-activated signaling pathway	1.29141e-151
csn-miR167k_R-3_1ss9CT	CL6842.Contig1_All	GO:0009908	biological_process	flower development	1.29141e-151
csn-miR169f_R-1_1ss20GA	CL531.Contig2_All	GO:0006351	biological_process	transcription, DNA-templated	5.37047e-136
csn-miR169f_R-1_1ss20GA	CL531.Contig2_All	GO:0006355	biological_process	regulation of transcription, DNA-templated	5.37047e-136
csn-miR164a-p3_2ss15CG18CG	CL851.Contig2_CKL	GO:0034059	biological_process	response to anoxia	7.39702e-99
csn-miR858b_R-3	CL1277.Contig1_All	GO:0006351	biological_process	transcription, DNA-templated	9.40999e-94
csn-miR858b_R-3	CL1277.Contig1_All	GO:0006355	biological_process	regulation of transcription, DNA-templated	9.40999e-94
csn-miR858b_R-3	CL1277.Contig1_All	GO:0009845	biological_process	seed germination	9.40999e-94
csn-miR858b_R-3	CL1277.Contig1_All	GO:0010026	biological_process	trichome differentiation	9.40999e-94
csn-miR858b_R-3	CL1277.Contig1_All	GO:0010090	biological_process	trichome morphogenesis	9.40999e-94
csn-miR858b_R-3	CL1277.Contig1_All	GO:0010214	biological_process	seed coat development	9.40999e-94
csn-miR858b_R-3	CL1277.Contig1_All	GO:0010468	biological_process	regulation of gene expression	9.40999e-94
csn-miR858b_R-3	CL1277.Contig1_All	GO:0048354	biological_process	mucilage biosynthetic process involved in seed coat development	9.40999e-94
PC-3p-123632_13	Unigene17777_All	GO:0006897	biological_process	endocytosis	4.19821e-95
PC-3p-123632_13	Unigene17777_All	GO:0008150	biological_process	biological_process	4.19821e-95
PC-3p-123632_13	Unigene17777_All	GO:0008360	biological_process	regulation of cell shape	4.19821e-95
PC-3p-123632_13	Unigene17777_All	GO:0016055	biological_process	Wnt signaling pathway	4.19821e-95
PC-3p-123632_13	Unigene17777_All	GO:0018105	biological_process	peptidyl-serine phosphorylation	4.19821e-95
csn-miR169e	CL531.Contig2_All	GO:0006351	biological_process	transcription, DNA-templated	5.37047e-136
csn-miR169e	CL531.Contig2_All	GO:0006355	biological_process	regulation of transcription, DNA-templated	5.37047e-136
csn-miR5368-p5_2ss15TC18CT	Unigene8246_All	GO:0005975	biological_process	carbohydrate metabolic process	4.96795e-227
csn-miR393a_1ss4AC	CL1310.Contig2_All	GO:0009734	biological_process	auxin-activated signaling pathway	2.55256e-297
PC-3p-58653_32	CL8717.Contig3_All	GO:0006749	biological_process	glutathione metabolic process	2.06423e-151
PC-3p-58653_32	CL8717.Contig3_All	GO:0045454	biological_process	cell redox homeostasis	2.06423e-151
PC-3p-58653_32	CL8717.Contig3_All	GO:0055114	biological_process	oxidation-reduction process	2.06423e-151
csn-miR159c_R-1_1ss19CT	Unigene46763_All	GO:0007015	biological_process	actin filament organization	4.0546e-135
csn-miR159c_R-1_1ss19CT	Unigene46763_All	GO:0009903	biological_process	chloroplast avoidance movement	4.0546e-135
csn-miR159c_R-1_1ss19CT	Unigene46763_All	GO:0009904	biological_process	chloroplast accumulation movement	4.0546e-135
csn-miR159c_R-1_1ss19CT	Unigene46763_All	GO:0071483	biological_process	cellular response to blue light	4.0546e-135
csn-miR160c	Unigene26726_All	GO:0006351	biological_process	transcription, DNA-templated	6.15633e-111
csn-miR160c	Unigene26726_All	GO:0006355	biological_process	regulation of transcription, DNA-templated	6.15633e-111
csn-miR160c	Unigene26726_All	GO:0007389	biological_process	pattern specification process	6.15633e-111
csn-miR160c	Unigene26726_All	GO:0009734	biological_process	auxin-activated signaling pathway	6.15633e-111
csn-miR160c	Unigene26726_All	GO:0009738	biological_process	abscisic acid-activated signaling pathway	6.15633e-111
csn-miR160c	Unigene26726_All	GO:0009743	biological_process	response to carbohydrate	6.15633e-111
csn-miR160c	Unigene26726_All	GO:0010154	biological_process	fruit development	6.15633e-111
csn-miR160c	Unigene26726_All	GO:0031540	biological_process	regulation of anthocyanin biosynthetic process	6.15633e-111
csn-miR160c	Unigene26726_All	GO:0048366	biological_process	leaf development	6.15633e-111
csn-miR160c	Unigene26726_All	GO:0048441	biological_process	petal development	6.15633e-111
csn-miR160c	Unigene26726_All	GO:0048442	biological_process	sepal development	6.15633e-111
csn-miR160c	Unigene26726_All	GO:0048589	biological_process	developmental growth	6.15633e-111
csn-miR160c	Unigene26726_All	GO:0048829	biological_process	root cap development	6.15633e-111
csn-miR160c	Unigene26726_All	GO:0051301	biological_process	cell division	6.15633e-111
csn-miR394a_R-2	CL4539.Contig2_All	GO:0010305	biological_process	leaf vascular tissue pattern formation	1.0711e-100
csn-miR394a_R-2	CL4539.Contig2_All	GO:0010928	biological_process	regulation of auxin mediated signaling pathway	1.0711e-100
csn-miR394a_R-2	CL4539.Contig2_All	GO:0031146	biological_process	SCF-dependent proteasomal ubiquitin-dependent protein catabolic process	1.0711e-100
csn-miR394a_R-2	CL4539.Contig2_All	GO:0060776	biological_process	simple leaf morphogenesis	1.0711e-100
csn-miR172d_L-2R+1	CL42.Contig1_All	GO:0006351	biological_process	transcription, DNA-templated	1.27087e-272
csn-miR172d_L-2R+1	CL42.Contig1_All	GO:0006355	biological_process	regulation of transcription, DNA-templated	1.27087e-272
csn-miR172d_L-2R+1	CL42.Contig1_All	GO:0008150	biological_process	biological_process	1.27087e-272
csn-miR172d_L-2R+1	CL42.Contig1_All	GO:0009908	biological_process	flower development	1.27087e-272
csn-miR172d_L-2R+1	CL42.Contig1_All	GO:0010073	biological_process	meristem maintenance	1.27087e-272
csn-miR172d_L-2R+1	CL42.Contig1_All	GO:0010093	biological_process	specification of floral organ identity	1.27087e-272
csn-miR172d_L-2R+1	CL42.Contig1_All	GO:0019953	biological_process	sexual reproduction	1.27087e-272
csn-miR172d_L-2R+1	CL42.Contig1_All	GO:0030154	biological_process	cell differentiation	1.27087e-272
csn-miR172d_L-2R+1	CL42.Contig1_All	GO:0048316	biological_process	seed development	1.27087e-272
csn-miR172d_L-2R+1	CL42.Contig1_All	GO:0048481	biological_process	plant ovule development	1.27087e-272
csn-miR160c-p5_2ss13AG17AG	Unigene28815_All	GO:0000024	biological_process	maltose biosynthetic process	9.27819e-231
csn-miR160c-p5_2ss13AG17AG	Unigene28815_All	GO:0005983	biological_process	starch catabolic process	9.27819e-231
csn-miR160c-p5_2ss13AG17AG	Unigene28815_All	GO:0009409	biological_process	response to cold	9.27819e-231
csn-miR477g-p5_2ss1CT22CT	CL3059.Contig16_All	GO:0006559	biological_process	L-phenylalanine catabolic process	3.82875e-89
csn-miR477g-p5_2ss1CT22CT	CL3059.Contig16_All	GO:0006952	biological_process	defense response	3.82875e-89
csn-miR477g-p5_2ss1CT22CT	CL3059.Contig16_All	GO:0006979	biological_process	response to oxidative stress	3.82875e-89
csn-miR477g-p5_2ss1CT22CT	CL3059.Contig16_All	GO:0009611	biological_process	response to wounding	3.82875e-89
csn-miR477g-p5_2ss1CT22CT	CL3059.Contig16_All	GO:0009699	biological_process	phenylpropanoid biosynthetic process	3.82875e-89
csn-miR477g-p5_2ss1CT22CT	CL3059.Contig16_All	GO:0009800	biological_process	cinnamic acid biosynthetic process	3.82875e-89
csn-miR477g-p5_2ss1CT22CT	CL3059.Contig16_All	GO:0080167	biological_process	response to karrikin	3.82875e-89
csn-miR393a	CL3747.Contig3_All	GO:0006468	biological_process	protein phosphorylation	9.95283e-134
csn-miR393a	CL3747.Contig3_All	GO:0007169	biological_process	transmembrane receptor protein tyrosine kinase signaling pathway	9.95283e-134
csn-miR393a	CL3747.Contig3_All	GO:0009734	biological_process	auxin-activated signaling pathway	9.95283e-134
csn-miR393a	CL3747.Contig3_All	GO:0009742	biological_process	brassinosteroid mediated signaling pathway	9.95283e-134
csn-miR393a	CL3747.Contig3_All	GO:0010051	biological_process	xylem and phloem pattern formation	9.95283e-134
csn-miR393a	CL3747.Contig3_All	GO:0010233	biological_process	phloem transport	9.95283e-134
csn-miR393a	CL3747.Contig3_All	GO:0010305	biological_process	leaf vascular tissue pattern formation	9.95283e-134
csn-miR172d_L-2	CL42.Contig1_All	GO:0006351	biological_process	transcription, DNA-templated	1.27087e-272
csn-miR172d_L-2	CL42.Contig1_All	GO:0006355	biological_process	regulation of transcription, DNA-templated	1.27087e-272
csn-miR172d_L-2	CL42.Contig1_All	GO:0008150	biological_process	biological_process	1.27087e-272
csn-miR172d_L-2	CL42.Contig1_All	GO:0009908	biological_process	flower development	1.27087e-272
csn-miR172d_L-2	CL42.Contig1_All	GO:0010073	biological_process	meristem maintenance	1.27087e-272
csn-miR172d_L-2	CL42.Contig1_All	GO:0010093	biological_process	specification of floral organ identity	1.27087e-272
csn-miR172d_L-2	CL42.Contig1_All	GO:0019953	biological_process	sexual reproduction	1.27087e-272
csn-miR172d_L-2	CL42.Contig1_All	GO:0030154	biological_process	cell differentiation	1.27087e-272
csn-miR172d_L-2	CL42.Contig1_All	GO:0048316	biological_process	seed development	1.27087e-272
csn-miR172d_L-2	CL42.Contig1_All	GO:0048481	biological_process	plant ovule development	1.27087e-272
csn-miR169x	CL531.Contig2_All	GO:0006351	biological_process	transcription, DNA-templated	5.37047e-136
csn-miR169x	CL531.Contig2_All	GO:0006355	biological_process	regulation of transcription, DNA-templated	5.37047e-136
PC-3p-136272_11	Unigene17777_All	GO:0006897	biological_process	endocytosis	4.19821e-95
PC-3p-136272_11	Unigene17777_All	GO:0008150	biological_process	biological_process	4.19821e-95
PC-3p-136272_11	Unigene17777_All	GO:0008360	biological_process	regulation of cell shape	4.19821e-95
PC-3p-136272_11	Unigene17777_All	GO:0016055	biological_process	Wnt signaling pathway	4.19821e-95
PC-3p-136272_11	Unigene17777_All	GO:0018105	biological_process	peptidyl-serine phosphorylation	4.19821e-95
csn-miR159b_R-1	Unigene46763_All	GO:0007015	biological_process	actin filament organization	4.0546e-135
csn-miR159b_R-1	Unigene46763_All	GO:0009903	biological_process	chloroplast avoidance movement	4.0546e-135
csn-miR159b_R-1	Unigene46763_All	GO:0009904	biological_process	chloroplast accumulation movement	4.0546e-135
csn-miR159b_R-1	Unigene46763_All	GO:0071483	biological_process	cellular response to blue light	4.0546e-135
csn-miR530a_R+1_1ss8GA	Unigene32099_CKL	GO:0006260	biological_process	DNA replication	7.14416e-114
csn-miR530a_R+1_1ss8GA	Unigene32099_CKL	GO:0006281	biological_process	DNA repair	7.14416e-114
csn-miR530a_R+1_1ss8GA	Unigene32099_CKL	GO:0006351	biological_process	transcription, DNA-templated	7.14416e-114
csn-miR530a_R+1_1ss8GA	Unigene32099_CKL	GO:0006355	biological_process	regulation of transcription, DNA-templated	7.14416e-114
csn-miR530a_R+1_1ss8GA	Unigene32099_CKL	GO:0006790	biological_process	sulfur compound metabolic process	7.14416e-114
csn-miR530a_R+1_1ss8GA	Unigene32099_CKL	GO:0009150	biological_process	purine ribonucleotide metabolic process	7.14416e-114
csn-miR166a_R+2_1	CL6740.Contig3_All	GO:0006351	biological_process	transcription, DNA-templated	4.79191e-125
csn-miR166a_R+2_1	CL6740.Contig3_All	GO:0006355	biological_process	regulation of transcription, DNA-templated	4.79191e-125
csn-miR166a_R+2_1	CL6740.Contig3_All	GO:0009855	biological_process	determination of bilateral symmetry	4.79191e-125
csn-miR166a_R+2_1	CL6740.Contig3_All	GO:0009944	biological_process	polarity specification of adaxial/abaxial axis	4.79191e-125
csn-miR166a_R+2_1	CL6740.Contig3_All	GO:0009956	biological_process	radial pattern formation	4.79191e-125
csn-miR166a_R+2_1	CL6740.Contig3_All	GO:0010014	biological_process	meristem initiation	4.79191e-125
csn-miR166a_R+2_1	CL6740.Contig3_All	GO:0010051	biological_process	xylem and phloem pattern formation	4.79191e-125
csn-miR166a_R+2_1	CL6740.Contig3_All	GO:0010089	biological_process	xylem development	4.79191e-125
csn-miR166a_R+2_1	CL6740.Contig3_All	GO:0030154	biological_process	cell differentiation	4.79191e-125
PC-5p-16074_116	CL6531.Contig2_All	GO:0001666	biological_process	response to hypoxia	7.00509e-123
PC-5p-16074_116	CL6531.Contig2_All	GO:0006810	biological_process	transport	7.00509e-123
PC-5p-16074_116	CL6531.Contig2_All	GO:0006952	biological_process	defense response	7.00509e-123
PC-5p-16074_116	CL6531.Contig2_All	GO:0009416	biological_process	response to light stimulus	7.00509e-123
PC-5p-16074_116	CL6531.Contig2_All	GO:0009617	biological_process	response to bacterium	7.00509e-123
PC-5p-16074_116	CL6531.Contig2_All	GO:0009646	biological_process	response to absence of light	7.00509e-123
PC-5p-16074_116	CL6531.Contig2_All	GO:0009768	biological_process	photosynthesis, light harvesting in photosystem I	7.00509e-123
PC-5p-16074_116	CL6531.Contig2_All	GO:0015908	biological_process	fatty acid transport	7.00509e-123
PC-5p-16074_116	CL6531.Contig2_All	GO:0042742	biological_process	defense response to bacterium	7.00509e-123
PC-5p-16074_116	CL6531.Contig2_All	GO:0050832	biological_process	defense response to fungus	7.00509e-123
csn-miR530a_R-1_1ss8GA	CL11675.Contig1_All	GO:0006352	biological_process	DNA-templated transcription, initiation	3.56242e-208
csn-miR530a_R-1_1ss8GA	CL11675.Contig1_All	GO:0006355	biological_process	regulation of transcription, DNA-templated	3.56242e-208
csn-miR530a_R-1_1ss8GA	CL11675.Contig1_All	GO:0006368	biological_process	transcription elongation from RNA polymerase II promoter	3.56242e-208
csn-miR530a_R-1_1ss8GA	CL11675.Contig1_All	GO:0016570	biological_process	histone modification	3.56242e-208
csn-miR530a_R-1_1ss8GA	CL11675.Contig1_All	GO:0040007	biological_process	growth	3.56242e-208
csn-miR164a-p3_2ss15CG18CG	CL2456.Contig6_All	GO:0009651	biological_process	response to salt stress	7.39702e-99
csn-miR164a-p3_2ss15CG18CG	CL2456.Contig6_All	GO:0015031	biological_process	protein transport	7.39702e-99
PC-5p-67501_27	Unigene24105_All	GO:0022900	biological_process	electron transport chain	7.14416e-114
csn-miR156a_R+1	Unigene375_All	GO:0006351	biological_process	transcription, DNA-templated	9.80233e-130
csn-miR156a_R+1	Unigene375_All	GO:0006355	biological_process	regulation of transcription, DNA-templated	9.80233e-130
csn-miR156a_R+1	Unigene375_All	GO:0048653	biological_process	anther development	9.80233e-130
csn-miR394b	CL4539.Contig1_All	GO:0010305	biological_process	leaf vascular tissue pattern formation	1.0711e-100
csn-miR394b	CL4539.Contig1_All	GO:0010928	biological_process	regulation of auxin mediated signaling pathway	1.0711e-100
csn-miR394b	CL4539.Contig1_All	GO:0031146	biological_process	SCF-dependent proteasomal ubiquitin-dependent protein catabolic process	1.0711e-100
csn-miR394b	CL4539.Contig1_All	GO:0060776	biological_process	simple leaf morphogenesis	1.0711e-100
csn-miR393a_R+1_1ss21CT	CL1310.Contig2_All	GO:0009734	biological_process	auxin-activated signaling pathway	2.55256e-297
PC-3p-58653_32	CL3545.Contig1_All	GO:0006071	biological_process	glycerol metabolic process	7.14416e-114
PC-3p-58653_32	CL3545.Contig1_All	GO:0006072	biological_process	glycerol-3-phosphate metabolic process	7.14416e-114
PC-3p-58653_32	CL3545.Contig1_All	GO:0006127	biological_process	glycerophosphate shuttle	7.14416e-114
PC-3p-58653_32	CL3545.Contig1_All	GO:0019563	biological_process	glycerol catabolic process	7.14416e-114
csn-miR166a_R+2_1ss1TG	CL6740.Contig2_All	GO:0006351	biological_process	transcription, DNA-templated	4.79191e-125
csn-miR166a_R+2_1ss1TG	CL6740.Contig2_All	GO:0006355	biological_process	regulation of transcription, DNA-templated	4.79191e-125
csn-miR166a_R+2_1ss1TG	CL6740.Contig2_All	GO:0009855	biological_process	determination of bilateral symmetry	4.79191e-125
csn-miR166a_R+2_1ss1TG	CL6740.Contig2_All	GO:0009944	biological_process	polarity specification of adaxial/abaxial axis	4.79191e-125
csn-miR166a_R+2_1ss1TG	CL6740.Contig2_All	GO:0009956	biological_process	radial pattern formation	4.79191e-125
csn-miR166a_R+2_1ss1TG	CL6740.Contig2_All	GO:0010014	biological_process	meristem initiation	4.79191e-125
csn-miR166a_R+2_1ss1TG	CL6740.Contig2_All	GO:0010051	biological_process	xylem and phloem pattern formation	4.79191e-125
csn-miR166a_R+2_1ss1TG	CL6740.Contig2_All	GO:0010089	biological_process	xylem development	4.79191e-125
csn-miR166a_R+2_1ss1TG	CL6740.Contig2_All	GO:0030154	biological_process	cell differentiation	4.79191e-125
csn-miR530a_R+1_1ss8GA	CL11675.Contig1_All	GO:0006352	biological_process	DNA-templated transcription, initiation	3.56242e-208
csn-miR530a_R+1_1ss8GA	CL11675.Contig1_All	GO:0006355	biological_process	regulation of transcription, DNA-templated	3.56242e-208
csn-miR530a_R+1_1ss8GA	CL11675.Contig1_All	GO:0006368	biological_process	transcription elongation from RNA polymerase II promoter	3.56242e-208
csn-miR530a_R+1_1ss8GA	CL11675.Contig1_All	GO:0016570	biological_process	histone modification	3.56242e-208
csn-miR530a_R+1_1ss8GA	CL11675.Contig1_All	GO:0040007	biological_process	growth	3.56242e-208
csn-miR160a	CL3788.Contig1_All	GO:0006351	biological_process	transcription, DNA-templated	6.15633e-111
csn-miR160a	CL3788.Contig1_All	GO:0006355	biological_process	regulation of transcription, DNA-templated	6.15633e-111
csn-miR160a	CL3788.Contig1_All	GO:0007389	biological_process	pattern specification process	6.15633e-111
csn-miR160a	CL3788.Contig1_All	GO:0009734	biological_process	auxin-activated signaling pathway	6.15633e-111
csn-miR160a	CL3788.Contig1_All	GO:0009738	biological_process	abscisic acid-activated signaling pathway	6.15633e-111
csn-miR160a	CL3788.Contig1_All	GO:0009743	biological_process	response to carbohydrate	6.15633e-111
csn-miR160a	CL3788.Contig1_All	GO:0010154	biological_process	fruit development	6.15633e-111
csn-miR160a	CL3788.Contig1_All	GO:0031540	biological_process	regulation of anthocyanin biosynthetic process	6.15633e-111
csn-miR160a	CL3788.Contig1_All	GO:0048366	biological_process	leaf development	6.15633e-111
csn-miR160a	CL3788.Contig1_All	GO:0048441	biological_process	petal development	6.15633e-111
csn-miR160a	CL3788.Contig1_All	GO:0048442	biological_process	sepal development	6.15633e-111
csn-miR160a	CL3788.Contig1_All	GO:0048589	biological_process	developmental growth	6.15633e-111
csn-miR160a	CL3788.Contig1_All	GO:0048829	biological_process	root cap development	6.15633e-111
csn-miR160a	CL3788.Contig1_All	GO:0051301	biological_process	cell division	6.15633e-111
csn-miR160c-p5_2ss13AG17AG	CL5722.Contig2_All	GO:0000024	biological_process	maltose biosynthetic process	9.27819e-231
csn-miR160c-p5_2ss13AG17AG	CL5722.Contig2_All	GO:0005983	biological_process	starch catabolic process	9.27819e-231
csn-miR160c-p5_2ss13AG17AG	CL5722.Contig2_All	GO:0009409	biological_process	response to cold	9.27819e-231
csn-miR164a_1ss13GT	Unigene18223_All	GO:0006351	biological_process	transcription, DNA-templated	1.02701e-263
csn-miR164a_1ss13GT	Unigene18223_All	GO:0006355	biological_process	regulation of transcription, DNA-templated	1.02701e-263
csn-miR164a_1ss13GT	Unigene18223_All	GO:0007275	biological_process	multicellular organism development	1.02701e-263
csn-miR160c	CL3788.Contig1_All	GO:0006351	biological_process	transcription, DNA-templated	6.15633e-111
csn-miR160c	CL3788.Contig1_All	GO:0006355	biological_process	regulation of transcription, DNA-templated	6.15633e-111
csn-miR160c	CL3788.Contig1_All	GO:0007389	biological_process	pattern specification process	6.15633e-111
csn-miR160c	CL3788.Contig1_All	GO:0009734	biological_process	auxin-activated signaling pathway	6.15633e-111
csn-miR160c	CL3788.Contig1_All	GO:0009738	biological_process	abscisic acid-activated signaling pathway	6.15633e-111
csn-miR160c	CL3788.Contig1_All	GO:0009743	biological_process	response to carbohydrate	6.15633e-111
csn-miR160c	CL3788.Contig1_All	GO:0010154	biological_process	fruit development	6.15633e-111
csn-miR160c	CL3788.Contig1_All	GO:0031540	biological_process	regulation of anthocyanin biosynthetic process	6.15633e-111
csn-miR160c	CL3788.Contig1_All	GO:0048366	biological_process	leaf development	6.15633e-111
csn-miR160c	CL3788.Contig1_All	GO:0048441	biological_process	petal development	6.15633e-111
csn-miR160c	CL3788.Contig1_All	GO:0048442	biological_process	sepal development	6.15633e-111
csn-miR160c	CL3788.Contig1_All	GO:0048589	biological_process	developmental growth	6.15633e-111
csn-miR160c	CL3788.Contig1_All	GO:0048829	biological_process	root cap development	6.15633e-111
csn-miR160c	CL3788.Contig1_All	GO:0051301	biological_process	cell division	6.15633e-111
csn-miR3630-3p_L-3_1ss22CA	CL1517.Contig1_EL	GO:0007010	biological_process	cytoskeleton organization	1.21483e-132
csn-miR3630-3p_L-3_1ss22CA	CL1517.Contig1_EL	GO:0009416	biological_process	response to light stimulus	1.21483e-132
csn-miR3630-3p_L-3_1ss22CA	CL1517.Contig1_EL	GO:0009611	biological_process	response to wounding	1.21483e-132
csn-miR3630-3p_L-3_1ss22CA	CL1517.Contig1_EL	GO:0009733	biological_process	response to auxin	1.21483e-132
csn-miR3630-3p_L-3_1ss22CA	CL1517.Contig1_EL	GO:0009845	biological_process	seed germination	1.21483e-132
csn-miR3630-3p_L-3_1ss22CA	CL1517.Contig1_EL	GO:0010053	biological_process	root epidermal cell differentiation	1.21483e-132
csn-miR3630-3p_L-3_1ss22CA	CL1517.Contig1_EL	GO:0048364	biological_process	root development	1.21483e-132
csn-miR3630-3p_L-3_1ss22CA	CL1517.Contig1_EL	GO:0048767	biological_process	root hair elongation	1.21483e-132
csn-miR3630-3p_L-3_1ss22CA	CL1517.Contig1_EL	GO:0051301	biological_process	cell division	1.21483e-132
csn-miR156h_L+1	Unigene375_All	GO:0006351	biological_process	transcription, DNA-templated	4.96795e-227
csn-miR156h_L+1	Unigene375_All	GO:0006355	biological_process	regulation of transcription, DNA-templated	4.96795e-227
csn-miR156h_L+1	Unigene375_All	GO:0048653	biological_process	anther development	4.96795e-227
csn-miR166a_R+2_2	CL6740.Contig3_All	GO:0006351	biological_process	transcription, DNA-templated	4.79191e-125
csn-miR166a_R+2_2	CL6740.Contig3_All	GO:0006355	biological_process	regulation of transcription, DNA-templated	4.79191e-125
csn-miR166a_R+2_2	CL6740.Contig3_All	GO:0009855	biological_process	determination of bilateral symmetry	4.79191e-125
csn-miR166a_R+2_2	CL6740.Contig3_All	GO:0009944	biological_process	polarity specification of adaxial/abaxial axis	4.79191e-125
csn-miR166a_R+2_2	CL6740.Contig3_All	GO:0009956	biological_process	radial pattern formation	4.79191e-125
csn-miR166a_R+2_2	CL6740.Contig3_All	GO:0010014	biological_process	meristem initiation	4.79191e-125
csn-miR166a_R+2_2	CL6740.Contig3_All	GO:0010051	biological_process	xylem and phloem pattern formation	4.79191e-125
csn-miR166a_R+2_2	CL6740.Contig3_All	GO:0010089	biological_process	xylem development	4.79191e-125
csn-miR166a_R+2_2	CL6740.Contig3_All	GO:0030154	biological_process	cell differentiation	4.79191e-125
csn-miR396b_R+1_2	Unigene32482_CKL	GO:0006396	biological_process	RNA processing	2.06423e-151
csn-miR396b_R+1_2	Unigene32482_CKL	GO:0006397	biological_process	mRNA processing	2.06423e-151
csn-miR396b_R+1_2	Unigene32482_CKL	GO:0009451	biological_process	RNA modification	2.06423e-151
csn-miR396b_R+1_2	Unigene32482_CKL	GO:0009631	biological_process	cold acclimation	2.06423e-151
csn-miR396b_R+1_2	Unigene32482_CKL	GO:0016553	biological_process	base conversion or substitution editing	2.06423e-151
csn-miR396b_R+1_2	Unigene32482_CKL	GO:0043489	biological_process	RNA stabilization	2.06423e-151
csn-miR396b_R+1_2	Unigene32482_CKL	GO:0045087	biological_process	innate immune response	2.06423e-151
csn-miR396b	Unigene8003_All	GO:0006351	biological_process	transcription, DNA-templated	0
csn-miR396b	Unigene8003_All	GO:0006355	biological_process	regulation of transcription, DNA-templated	0
csn-miR396b	Unigene8003_All	GO:0009624	biological_process	response to nematode	0
csn-miR396b	Unigene8003_All	GO:0048364	biological_process	root development	0
csn-miR396b	Unigene8003_All	GO:0048366	biological_process	leaf development	0
csn-miR396b	Unigene8003_All	GO:0061062	biological_process	regulation of nematode larval development	0
PC-3p-104331_16	CL10182.Contig2_All	GO:0006364	biological_process	rRNA processing	2.06423e-151
PC-3p-104331_16	CL10182.Contig2_All	GO:0006409	biological_process	tRNA export from nucleus	2.06423e-151
csn-miR167k_R-3_1ss9CT	CL1028.Contig5_All	GO:0006351	biological_process	transcription, DNA-templated	1.29141e-151
csn-miR167k_R-3_1ss9CT	CL1028.Contig5_All	GO:0006355	biological_process	regulation of transcription, DNA-templated	1.29141e-151
csn-miR167k_R-3_1ss9CT	CL1028.Contig5_All	GO:0009733	biological_process	response to auxin	1.29141e-151
csn-miR167k_R-3_1ss9CT	CL1028.Contig5_All	GO:0009734	biological_process	auxin-activated signaling pathway	1.29141e-151
csn-miR167k_R-3_1ss9CT	CL1028.Contig5_All	GO:0009908	biological_process	flower development	1.29141e-151
csn-miR166a_R+2_1ss1TG	Unigene33923_All	GO:0006351	biological_process	transcription, DNA-templated	1.35153e-116
csn-miR166a_R+2_1ss1TG	Unigene33923_All	GO:0006355	biological_process	regulation of transcription, DNA-templated	1.35153e-116
csn-miR166a_R+2_1ss1TG	Unigene33923_All	GO:0008284	biological_process	positive regulation of cell proliferation	1.35153e-116
csn-miR166a_R+2_1ss1TG	Unigene33923_All	GO:0009733	biological_process	response to auxin	1.35153e-116
csn-miR166a_R+2_1ss1TG	Unigene33923_All	GO:0010014	biological_process	meristem initiation	1.35153e-116
csn-miR166a_R+2_1ss1TG	Unigene33923_All	GO:0010067	biological_process	procambium histogenesis	1.35153e-116
csn-miR166a_R+2_1ss1TG	Unigene33923_All	GO:0010072	biological_process	primary shoot apical meristem specification	1.35153e-116
csn-miR166a_R+2_1ss1TG	Unigene33923_All	GO:0010089	biological_process	xylem development	1.35153e-116
csn-miR166a_R+2_1ss1TG	Unigene33923_All	GO:0030154	biological_process	cell differentiation	1.35153e-116
csn-miR166a_R+2_1ss1TG	Unigene33923_All	GO:0045597	biological_process	positive regulation of cell differentiation	1.35153e-116
csn-miR828a	CL3426.Contig2_All	GO:0006351	biological_process	transcription, DNA-templated	5.52099e-168
csn-miR828a	CL3426.Contig2_All	GO:0006355	biological_process	regulation of transcription, DNA-templated	5.52099e-168
csn-miR828a	CL3426.Contig2_All	GO:0045165	biological_process	cell fate commitment	5.52099e-168
csn-miR828a	CL3426.Contig2_All	GO:0045893	biological_process	positive regulation of transcription, DNA-templated	5.52099e-168
csn-miR828a	CL3426.Contig2_All	GO:0048765	biological_process	root hair cell differentiation	5.52099e-168
PC-3p-134668_11	Unigene19919_All	GO:0006412	biological_process	translation	4.08258e-251
csn-miR394b_1ss3GT	CL4539.Contig1_All	GO:0010305	biological_process	leaf vascular tissue pattern formation	1.0711e-100
csn-miR394b_1ss3GT	CL4539.Contig1_All	GO:0010928	biological_process	regulation of auxin mediated signaling pathway	1.0711e-100
csn-miR394b_1ss3GT	CL4539.Contig1_All	GO:0031146	biological_process	SCF-dependent proteasomal ubiquitin-dependent protein catabolic process	1.0711e-100
csn-miR394b_1ss3GT	CL4539.Contig1_All	GO:0060776	biological_process	simple leaf morphogenesis	1.0711e-100
PC-3p-100962_17	CL756.Contig1_All	GO:0008150	biological_process	biological_process	4.03445e-162
csn-miR156b-5p_R+1	Unigene21845_EL	GO:0006412	biological_process	translation	3.63898e-161
csn-miR156b-5p_R+1	Unigene21845_EL	GO:0044238	biological_process	primary metabolic process	3.63898e-161
PC-3p-166627_9	Unigene17777_All	GO:0006897	biological_process	endocytosis	4.19821e-95
PC-3p-166627_9	Unigene17777_All	GO:0008150	biological_process	biological_process	4.19821e-95
PC-3p-166627_9	Unigene17777_All	GO:0008360	biological_process	regulation of cell shape	4.19821e-95
PC-3p-166627_9	Unigene17777_All	GO:0016055	biological_process	Wnt signaling pathway	4.19821e-95
PC-3p-166627_9	Unigene17777_All	GO:0018105	biological_process	peptidyl-serine phosphorylation	4.19821e-95
csn-miR160c	CL3788.Contig1_All	GO:0006351	biological_process	transcription, DNA-templated	6.15633e-111
csn-miR160c	CL3788.Contig1_All	GO:0006355	biological_process	regulation of transcription, DNA-templated	6.15633e-111
csn-miR160c	CL3788.Contig1_All	GO:0007389	biological_process	pattern specification process	6.15633e-111
csn-miR160c	CL3788.Contig1_All	GO:0009734	biological_process	auxin-activated signaling pathway	6.15633e-111
csn-miR160c	CL3788.Contig1_All	GO:0009738	biological_process	abscisic acid-activated signaling pathway	6.15633e-111
csn-miR160c	CL3788.Contig1_All	GO:0009743	biological_process	response to carbohydrate	6.15633e-111
csn-miR160c	CL3788.Contig1_All	GO:0010154	biological_process	fruit development	6.15633e-111
csn-miR160c	CL3788.Contig1_All	GO:0031540	biological_process	regulation of anthocyanin biosynthetic process	6.15633e-111
csn-miR160c	CL3788.Contig1_All	GO:0048366	biological_process	leaf development	6.15633e-111
csn-miR160c	CL3788.Contig1_All	GO:0048441	biological_process	petal development	6.15633e-111
csn-miR160c	CL3788.Contig1_All	GO:0048442	biological_process	sepal development	6.15633e-111
csn-miR160c	CL3788.Contig1_All	GO:0048589	biological_process	developmental growth	6.15633e-111
csn-miR160c	CL3788.Contig1_All	GO:0048829	biological_process	root cap development	6.15633e-111
csn-miR160c	CL3788.Contig1_All	GO:0051301	biological_process	cell division	6.15633e-111
csn-miR5083-p5_1ss19GC	Unigene32760_EL	GO:0010239	biological_process	chloroplast mRNA processing	8.9702e-96
csn-miR5083-p5_1ss19GC	Unigene32760_EL	GO:0031426	biological_process	polycistronic mRNA processing	8.9702e-96
csn-miR828a	CL3426.Contig1_All	GO:0006351	biological_process	transcription, DNA-templated	5.52099e-168
csn-miR828a	CL3426.Contig1_All	GO:0006355	biological_process	regulation of transcription, DNA-templated	5.52099e-168
csn-miR828a	CL3426.Contig1_All	GO:0045165	biological_process	cell fate commitment	5.52099e-168
csn-miR828a	CL3426.Contig1_All	GO:0045893	biological_process	positive regulation of transcription, DNA-templated	5.52099e-168
csn-miR828a	CL3426.Contig1_All	GO:0048765	biological_process	root hair cell differentiation	5.52099e-168
csn-miR166a_R+2_1	CL6740.Contig4_All	GO:0006351	biological_process	transcription, DNA-templated	4.79191e-125
csn-miR166a_R+2_1	CL6740.Contig4_All	GO:0006355	biological_process	regulation of transcription, DNA-templated	4.79191e-125
csn-miR166a_R+2_1	CL6740.Contig4_All	GO:0009855	biological_process	determination of bilateral symmetry	4.79191e-125
csn-miR166a_R+2_1	CL6740.Contig4_All	GO:0009944	biological_process	polarity specification of adaxial/abaxial axis	4.79191e-125
csn-miR166a_R+2_1	CL6740.Contig4_All	GO:0009956	biological_process	radial pattern formation	4.79191e-125
csn-miR166a_R+2_1	CL6740.Contig4_All	GO:0010014	biological_process	meristem initiation	4.79191e-125
csn-miR166a_R+2_1	CL6740.Contig4_All	GO:0010051	biological_process	xylem and phloem pattern formation	4.79191e-125
csn-miR166a_R+2_1	CL6740.Contig4_All	GO:0010089	biological_process	xylem development	4.79191e-125
csn-miR166a_R+2_1	CL6740.Contig4_All	GO:0030154	biological_process	cell differentiation	4.79191e-125
csn-miR169e_R-1_1ss21GT	CL531.Contig3_All	GO:0006351	biological_process	transcription, DNA-templated	5.37047e-136
csn-miR169e_R-1_1ss21GT	CL531.Contig3_All	GO:0006355	biological_process	regulation of transcription, DNA-templated	5.37047e-136
csn-miR394b_1ss14CA	CL4539.Contig2_All	GO:0010305	biological_process	leaf vascular tissue pattern formation	1.0711e-100
csn-miR394b_1ss14CA	CL4539.Contig2_All	GO:0010928	biological_process	regulation of auxin mediated signaling pathway	1.0711e-100
csn-miR394b_1ss14CA	CL4539.Contig2_All	GO:0031146	biological_process	SCF-dependent proteasomal ubiquitin-dependent protein catabolic process	1.0711e-100
csn-miR394b_1ss14CA	CL4539.Contig2_All	GO:0060776	biological_process	simple leaf morphogenesis	1.0711e-100
csn-miR160c-p5_2ss13AG17AG	Unigene19794_All	GO:0006952	biological_process	defense response	1.7297e-189
csn-miR160c-p5_2ss13AG17AG	Unigene19794_All	GO:0009807	biological_process	lignan biosynthetic process	1.7297e-189
csn-miR156t	Unigene375_All	GO:0006351	biological_process	transcription, DNA-templated	4.96795e-227
csn-miR156t	Unigene375_All	GO:0006355	biological_process	regulation of transcription, DNA-templated	4.96795e-227
csn-miR156t	Unigene375_All	GO:0048653	biological_process	anther development	4.96795e-227
csn-miR156a_R+1	Unigene21845_EL	GO:0006412	biological_process	translation	3.63898e-161
csn-miR156a_R+1	Unigene21845_EL	GO:0044238	biological_process	primary metabolic process	3.63898e-161
csn-miR166a_R+2_3	Unigene33923_All	GO:0006351	biological_process	transcription, DNA-templated	1.35153e-116
csn-miR166a_R+2_3	Unigene33923_All	GO:0006355	biological_process	regulation of transcription, DNA-templated	1.35153e-116
csn-miR166a_R+2_3	Unigene33923_All	GO:0008284	biological_process	positive regulation of cell proliferation	1.35153e-116
csn-miR166a_R+2_3	Unigene33923_All	GO:0009733	biological_process	response to auxin	1.35153e-116
csn-miR166a_R+2_3	Unigene33923_All	GO:0010014	biological_process	meristem initiation	1.35153e-116
csn-miR166a_R+2_3	Unigene33923_All	GO:0010067	biological_process	procambium histogenesis	1.35153e-116
csn-miR166a_R+2_3	Unigene33923_All	GO:0010072	biological_process	primary shoot apical meristem specification	1.35153e-116
csn-miR166a_R+2_3	Unigene33923_All	GO:0010089	biological_process	xylem development	1.35153e-116
csn-miR166a_R+2_3	Unigene33923_All	GO:0030154	biological_process	cell differentiation	1.35153e-116
csn-miR166a_R+2_3	Unigene33923_All	GO:0045597	biological_process	positive regulation of cell differentiation	1.35153e-116
csn-miR319a_R-1	CL13487.Contig3_All	GO:0006351	biological_process	transcription, DNA-templated	0
csn-miR319a_R-1	CL13487.Contig3_All	GO:0006355	biological_process	regulation of transcription, DNA-templated	0
csn-miR319a_R-1	CL13487.Contig3_All	GO:0009793	biological_process	embryo development ending in seed dormancy	0
csn-miR319a_R-1	CL13487.Contig3_All	GO:0009965	biological_process	leaf morphogenesis	0
csn-miR319a_R-1	CL13487.Contig3_All	GO:0030154	biological_process	cell differentiation	0
csn-miR319a_R-1	CL13487.Contig3_All	GO:0045962	biological_process	positive regulation of development, heterochronic	0
csn-miR319a_R-1	CL13487.Contig3_All	GO:0048366	biological_process	leaf development	0
csn-miR169a_R-2	CL531.Contig2_All	GO:0006351	biological_process	transcription, DNA-templated	5.37047e-136
csn-miR169a_R-2	CL531.Contig2_All	GO:0006355	biological_process	regulation of transcription, DNA-templated	5.37047e-136
csn-miR159c_R-1_1ss19CA	CL564.Contig1_EL	GO:0010027	biological_process	thylakoid membrane organization	2.6783e-104
csn-miR159c_R-1_1ss19CA	CL564.Contig1_EL	GO:0010196	biological_process	nonphotochemical quenching	2.6783e-104
csn-miR159c_R-1_1ss19CA	CL564.Contig1_EL	GO:0015979	biological_process	photosynthesis	2.6783e-104
csn-miR159c_R-1_1ss19CA	CL564.Contig1_EL	GO:0080167	biological_process	response to karrikin	2.6783e-104
csn-miR166a_R+2_2	CL10714.Contig3_All	GO:0006351	biological_process	transcription, DNA-templated	1.35153e-116
csn-miR166a_R+2_2	CL10714.Contig3_All	GO:0006355	biological_process	regulation of transcription, DNA-templated	1.35153e-116
csn-miR166a_R+2_2	CL10714.Contig3_All	GO:0009855	biological_process	determination of bilateral symmetry	1.35153e-116
csn-miR166a_R+2_2	CL10714.Contig3_All	GO:0009887	biological_process	organ morphogenesis	1.35153e-116
csn-miR166a_R+2_2	CL10714.Contig3_All	GO:0009965	biological_process	leaf morphogenesis	1.35153e-116
csn-miR166a_R+2_2	CL10714.Contig3_All	GO:0010014	biological_process	meristem initiation	1.35153e-116
csn-miR166a_R+2_2	CL10714.Contig3_All	GO:0010073	biological_process	meristem maintenance	1.35153e-116
csn-miR166a_R+2_2	CL10714.Contig3_All	GO:0010075	biological_process	regulation of meristem growth	1.35153e-116
csn-miR166a_R+2_2	CL10714.Contig3_All	GO:0010087	biological_process	phloem or xylem histogenesis	1.35153e-116
csn-miR166a_R+2_2	CL10714.Contig3_All	GO:0030154	biological_process	cell differentiation	1.35153e-116
csn-miR166a_R+2_2	CL10714.Contig3_All	GO:0048263	biological_process	determination of dorsal identity	1.35153e-116
csn-miR166a_R+2_2	CL10714.Contig3_All	GO:0080060	biological_process	integument development	1.35153e-116
csn-miR2592bj-p3_2ss10TC17AT	CL687.Contig2_All	GO:0008150	biological_process	biological_process	0
csn-miR164a	CL2400.Contig2_All	GO:0006351	biological_process	transcription, DNA-templated	0
csn-miR164a	CL2400.Contig2_All	GO:0006355	biological_process	regulation of transcription, DNA-templated	0
csn-miR164a	CL2400.Contig2_All	GO:0007275	biological_process	multicellular organism development	0
csn-miR164a	CL2400.Contig2_All	GO:0009734	biological_process	auxin-activated signaling pathway	0
csn-miR164a	CL2400.Contig2_All	GO:0010072	biological_process	primary shoot apical meristem specification	0
csn-miR164a	CL2400.Contig2_All	GO:0048527	biological_process	lateral root development	0
csn-miR166a-3p	CL10714.Contig3_All	GO:0006351	biological_process	transcription, DNA-templated	1.35153e-116
csn-miR166a-3p	CL10714.Contig3_All	GO:0006355	biological_process	regulation of transcription, DNA-templated	1.35153e-116
csn-miR166a-3p	CL10714.Contig3_All	GO:0009855	biological_process	determination of bilateral symmetry	1.35153e-116
csn-miR166a-3p	CL10714.Contig3_All	GO:0009887	biological_process	organ morphogenesis	1.35153e-116
csn-miR166a-3p	CL10714.Contig3_All	GO:0009965	biological_process	leaf morphogenesis	1.35153e-116
csn-miR166a-3p	CL10714.Contig3_All	GO:0010014	biological_process	meristem initiation	1.35153e-116
csn-miR166a-3p	CL10714.Contig3_All	GO:0010073	biological_process	meristem maintenance	1.35153e-116
csn-miR166a-3p	CL10714.Contig3_All	GO:0010075	biological_process	regulation of meristem growth	1.35153e-116
csn-miR166a-3p	CL10714.Contig3_All	GO:0010087	biological_process	phloem or xylem histogenesis	1.35153e-116
csn-miR166a-3p	CL10714.Contig3_All	GO:0030154	biological_process	cell differentiation	1.35153e-116
csn-miR166a-3p	CL10714.Contig3_All	GO:0048263	biological_process	determination of dorsal identity	1.35153e-116
csn-miR166a-3p	CL10714.Contig3_All	GO:0080060	biological_process	integument development	1.35153e-116
csn-miR164a	Unigene42652_All	GO:0006351	biological_process	transcription, DNA-templated	0
csn-miR164a	Unigene42652_All	GO:0006355	biological_process	regulation of transcription, DNA-templated	0
csn-miR164a	Unigene42652_All	GO:0007275	biological_process	multicellular organism development	0
csn-miR166a-3p	CL6740.Contig2_All	GO:0006351	biological_process	transcription, DNA-templated	4.79191e-125
csn-miR166a-3p	CL6740.Contig2_All	GO:0006355	biological_process	regulation of transcription, DNA-templated	4.79191e-125
csn-miR166a-3p	CL6740.Contig2_All	GO:0009855	biological_process	determination of bilateral symmetry	4.79191e-125
csn-miR166a-3p	CL6740.Contig2_All	GO:0009944	biological_process	polarity specification of adaxial/abaxial axis	4.79191e-125
csn-miR166a-3p	CL6740.Contig2_All	GO:0009956	biological_process	radial pattern formation	4.79191e-125
csn-miR166a-3p	CL6740.Contig2_All	GO:0010014	biological_process	meristem initiation	4.79191e-125
csn-miR166a-3p	CL6740.Contig2_All	GO:0010051	biological_process	xylem and phloem pattern formation	4.79191e-125
csn-miR166a-3p	CL6740.Contig2_All	GO:0010089	biological_process	xylem development	4.79191e-125
csn-miR166a-3p	CL6740.Contig2_All	GO:0030154	biological_process	cell differentiation	4.79191e-125
csn-miR166a-3p	CL6740.Contig4_All	GO:0006351	biological_process	transcription, DNA-templated	4.79191e-125
csn-miR166a-3p	CL6740.Contig4_All	GO:0006355	biological_process	regulation of transcription, DNA-templated	4.79191e-125
csn-miR166a-3p	CL6740.Contig4_All	GO:0009855	biological_process	determination of bilateral symmetry	4.79191e-125
csn-miR166a-3p	CL6740.Contig4_All	GO:0009944	biological_process	polarity specification of adaxial/abaxial axis	4.79191e-125
csn-miR166a-3p	CL6740.Contig4_All	GO:0009956	biological_process	radial pattern formation	4.79191e-125
csn-miR166a-3p	CL6740.Contig4_All	GO:0010014	biological_process	meristem initiation	4.79191e-125
csn-miR166a-3p	CL6740.Contig4_All	GO:0010051	biological_process	xylem and phloem pattern formation	4.79191e-125
csn-miR166a-3p	CL6740.Contig4_All	GO:0010089	biological_process	xylem development	4.79191e-125
csn-miR166a-3p	CL6740.Contig4_All	GO:0030154	biological_process	cell differentiation	4.79191e-125
csn-miR396b_R+1_2	Unigene8003_All	GO:0006351	biological_process	transcription, DNA-templated	0
csn-miR396b_R+1_2	Unigene8003_All	GO:0006355	biological_process	regulation of transcription, DNA-templated	0
csn-miR396b_R+1_2	Unigene8003_All	GO:0009624	biological_process	response to nematode	0
csn-miR396b_R+1_2	Unigene8003_All	GO:0048364	biological_process	root development	0
csn-miR396b_R+1_2	Unigene8003_All	GO:0048366	biological_process	leaf development	0
csn-miR396b_R+1_2	Unigene8003_All	GO:0061062	biological_process	regulation of nematode larval development	0
PC-3p-47964_39	Unigene17777_All	GO:0006897	biological_process	endocytosis	4.19821e-95
PC-3p-47964_39	Unigene17777_All	GO:0008150	biological_process	biological_process	4.19821e-95
PC-3p-47964_39	Unigene17777_All	GO:0008360	biological_process	regulation of cell shape	4.19821e-95
PC-3p-47964_39	Unigene17777_All	GO:0016055	biological_process	Wnt signaling pathway	4.19821e-95
PC-3p-47964_39	Unigene17777_All	GO:0018105	biological_process	peptidyl-serine phosphorylation	4.19821e-95
csn-miR156f	Unigene375_All	GO:0006351	biological_process	transcription, DNA-templated	4.96795e-227
csn-miR156f	Unigene375_All	GO:0006355	biological_process	regulation of transcription, DNA-templated	4.96795e-227
csn-miR156f	Unigene375_All	GO:0048653	biological_process	anther development	4.96795e-227
csn-miR477g-p5_1ss1CT	CL3059.Contig24_All	GO:0006559	biological_process	L-phenylalanine catabolic process	3.82875e-89
csn-miR477g-p5_1ss1CT	CL3059.Contig24_All	GO:0006952	biological_process	defense response	3.82875e-89
csn-miR477g-p5_1ss1CT	CL3059.Contig24_All	GO:0006979	biological_process	response to oxidative stress	3.82875e-89
csn-miR477g-p5_1ss1CT	CL3059.Contig24_All	GO:0009555	biological_process	pollen development	3.82875e-89
csn-miR477g-p5_1ss1CT	CL3059.Contig24_All	GO:0009611	biological_process	response to wounding	3.82875e-89
csn-miR477g-p5_1ss1CT	CL3059.Contig24_All	GO:0009699	biological_process	phenylpropanoid biosynthetic process	3.82875e-89
csn-miR477g-p5_1ss1CT	CL3059.Contig24_All	GO:0009800	biological_process	cinnamic acid biosynthetic process	3.82875e-89
csn-miR477g-p5_1ss1CT	CL3059.Contig24_All	GO:0009819	biological_process	drought recovery	3.82875e-89
csn-miR477g-p5_1ss1CT	CL3059.Contig24_All	GO:0010224	biological_process	response to UV-B	3.82875e-89
csn-miR477g-p5_1ss1CT	CL3059.Contig24_All	GO:0046244	biological_process	salicylic acid catabolic process	3.82875e-89
csn-miR477g-p5_1ss1CT	CL3059.Contig24_All	GO:0046274	biological_process	lignin catabolic process	3.82875e-89
csn-miR477g-p5_1ss1CT	CL3059.Contig24_All	GO:0080167	biological_process	response to karrikin	3.82875e-89
csn-miR164a_L+1_2	Unigene42652_All	GO:0006351	biological_process	transcription, DNA-templated	1.7297e-189
csn-miR164a_L+1_2	Unigene42652_All	GO:0006355	biological_process	regulation of transcription, DNA-templated	1.7297e-189
csn-miR164a_L+1_2	Unigene42652_All	GO:0007275	biological_process	multicellular organism development	1.7297e-189
csn-miR828a	CL7677.Contig1_All	GO:0006351	biological_process	transcription, DNA-templated	1.62609e-130
csn-miR828a	CL7677.Contig1_All	GO:0006355	biological_process	regulation of transcription, DNA-templated	1.62609e-130
csn-miR828a	CL7677.Contig1_All	GO:0045165	biological_process	cell fate commitment	1.62609e-130
csn-miR828a	CL7677.Contig1_All	GO:0045893	biological_process	positive regulation of transcription, DNA-templated	1.62609e-130
csn-miR828a	CL7677.Contig1_All	GO:0048765	biological_process	root hair cell differentiation	1.62609e-130
csn-miR7972_1ss9CG	CL278.Contig6_All	GO:0006281	biological_process	DNA repair	1.01121e-264
csn-miR7972_1ss9CG	CL278.Contig6_All	GO:0006284	biological_process	base-excision repair	1.01121e-264
csn-miR7972_1ss9CG	CL278.Contig6_All	GO:0006306	biological_process	DNA methylation	1.01121e-264
csn-miR7972_1ss9CG	CL278.Contig6_All	GO:0006342	biological_process	chromatin silencing	1.01121e-264
csn-miR7972_1ss9CG	CL278.Contig6_All	GO:0006351	biological_process	transcription, DNA-templated	1.01121e-264
csn-miR7972_1ss9CG	CL278.Contig6_All	GO:0031936	biological_process	negative regulation of chromatin silencing	1.01121e-264
csn-miR7972_1ss9CG	CL278.Contig6_All	GO:0080111	biological_process	DNA demethylation	1.01121e-264
PC-3p-91294_19	Unigene17777_All	GO:0006897	biological_process	endocytosis	4.19821e-95
PC-3p-91294_19	Unigene17777_All	GO:0008150	biological_process	biological_process	4.19821e-95
PC-3p-91294_19	Unigene17777_All	GO:0008360	biological_process	regulation of cell shape	4.19821e-95
PC-3p-91294_19	Unigene17777_All	GO:0016055	biological_process	Wnt signaling pathway	4.19821e-95
PC-3p-91294_19	Unigene17777_All	GO:0018105	biological_process	peptidyl-serine phosphorylation	4.19821e-95
csn-miR167k_R-3_1ss9CT	CL9856.Contig2_CKL	GO:0006351	biological_process	transcription, DNA-templated	1.31208e-94
csn-miR167k_R-3_1ss9CT	CL9856.Contig2_CKL	GO:0006355	biological_process	regulation of transcription, DNA-templated	1.31208e-94
csn-miR167k_R-3_1ss9CT	CL9856.Contig2_CKL	GO:0009733	biological_process	response to auxin	1.31208e-94
csn-miR167k_R-3_1ss9CT	CL9856.Contig2_CKL	GO:0009734	biological_process	auxin-activated signaling pathway	1.31208e-94
csn-miR167k_R-3_1ss9CT	CL9856.Contig2_CKL	GO:0009908	biological_process	flower development	1.31208e-94
csn-miR8757b-p5_1ss1TG	CL10415.Contig1_All	GO:0071554	biological_process	cell wall organization or biogenesis	1.7297e-189
PC-3p-180347_8	Unigene4959_All	GO:0007165	biological_process	signal transduction	7.14416e-114
PC-3p-180347_8	Unigene4959_All	GO:0008150	biological_process	biological_process	7.14416e-114
csn-miR319b_R-1	Unigene16900_All	GO:0006468	biological_process	protein phosphorylation	0
csn-miR319b_R-1	Unigene16900_All	GO:0007169	biological_process	transmembrane receptor protein tyrosine kinase signaling pathway	0
csn-miR858a_L-1R+1	CL7722.Contig1_All	GO:0006351	biological_process	transcription, DNA-templated	2.97415e-152
csn-miR858a_L-1R+1	CL7722.Contig1_All	GO:0007275	biological_process	multicellular organism development	2.97415e-152
csn-miR858a_L-1R+1	CL7722.Contig1_All	GO:0010026	biological_process	trichome differentiation	2.97415e-152
csn-miR858a_L-1R+1	CL7722.Contig1_All	GO:0045893	biological_process	positive regulation of transcription, DNA-templated	2.97415e-152
csn-miR164a-p5_2ss15CG18CG	CL851.Contig2_CKL	GO:0034059	biological_process	response to anoxia	7.39702e-99
csn-miR165a-p5_2ss15AT19CT	Unigene33923_All	GO:0006351	biological_process	transcription, DNA-templated	1.35153e-116
csn-miR165a-p5_2ss15AT19CT	Unigene33923_All	GO:0006355	biological_process	regulation of transcription, DNA-templated	1.35153e-116
csn-miR165a-p5_2ss15AT19CT	Unigene33923_All	GO:0008284	biological_process	positive regulation of cell proliferation	1.35153e-116
csn-miR165a-p5_2ss15AT19CT	Unigene33923_All	GO:0009733	biological_process	response to auxin	1.35153e-116
csn-miR165a-p5_2ss15AT19CT	Unigene33923_All	GO:0010014	biological_process	meristem initiation	1.35153e-116
csn-miR165a-p5_2ss15AT19CT	Unigene33923_All	GO:0010067	biological_process	procambium histogenesis	1.35153e-116
csn-miR165a-p5_2ss15AT19CT	Unigene33923_All	GO:0010072	biological_process	primary shoot apical meristem specification	1.35153e-116
csn-miR165a-p5_2ss15AT19CT	Unigene33923_All	GO:0010089	biological_process	xylem development	1.35153e-116
csn-miR165a-p5_2ss15AT19CT	Unigene33923_All	GO:0030154	biological_process	cell differentiation	1.35153e-116
csn-miR165a-p5_2ss15AT19CT	Unigene33923_All	GO:0045597	biological_process	positive regulation of cell differentiation	1.35153e-116
csn-miR319g_L+1R-2	Unigene16900_All	GO:0006468	biological_process	protein phosphorylation	1.07661e-211
csn-miR319g_L+1R-2	Unigene16900_All	GO:0007169	biological_process	transmembrane receptor protein tyrosine kinase signaling pathway	1.07661e-211
csn-miR169d-p3_1ss9CA	CL12654.Contig2_All	GO:0009738	biological_process	abscisic acid-activated signaling pathway	7.14416e-114
csn-miR169d-p3_1ss9CA	CL12654.Contig2_All	GO:0018105	biological_process	peptidyl-serine phosphorylation	7.14416e-114
csn-miR169d-p3_1ss9CA	CL12654.Contig2_All	GO:0035556	biological_process	intracellular signal transduction	7.14416e-114
csn-miR169d-p3_1ss9CA	CL12654.Contig2_All	GO:0046777	biological_process	protein autophosphorylation	7.14416e-114
csn-miR396b-p3_2ss18AT19CT	CL2731.Contig2_All	GO:0010267	biological_process	production of ta-siRNAs involved in RNA interference	7.14416e-114
csn-miR396b-p3_2ss18AT19CT	CL2731.Contig2_All	GO:0016032	biological_process	viral process	7.14416e-114
csn-miR396b-p3_2ss18AT19CT	CL2731.Contig2_All	GO:0035196	biological_process	production of miRNAs involved in gene silencing by miRNA	7.14416e-114
csn-miR396b-p3_2ss18AT19CT	CL2731.Contig2_All	GO:0060145	biological_process	viral gene silencing in virus induced gene silencing	7.14416e-114
csn-miR396b-p3_2ss18AT19CT	CL2731.Contig2_All	GO:0070919	biological_process	production of siRNA involved in chromatin silencing by small RNA	7.14416e-114
PC-3p-134668_11	CL7018.Contig2_All	GO:0009738	biological_process	abscisic acid-activated signaling pathway	7.14416e-114
PC-3p-134668_11	CL7018.Contig2_All	GO:0018105	biological_process	peptidyl-serine phosphorylation	7.14416e-114
PC-3p-134668_11	CL7018.Contig2_All	GO:0035556	biological_process	intracellular signal transduction	7.14416e-114
PC-3p-134668_11	CL7018.Contig2_All	GO:0046777	biological_process	protein autophosphorylation	7.14416e-114
csn-miR530a_R-1_1ss8GA	CL11675.Contig2_All	GO:0006352	biological_process	DNA-templated transcription, initiation	3.56242e-208
csn-miR530a_R-1_1ss8GA	CL11675.Contig2_All	GO:0006355	biological_process	regulation of transcription, DNA-templated	3.56242e-208
csn-miR530a_R-1_1ss8GA	CL11675.Contig2_All	GO:0006368	biological_process	transcription elongation from RNA polymerase II promoter	3.56242e-208
csn-miR530a_R-1_1ss8GA	CL11675.Contig2_All	GO:0016570	biological_process	histone modification	3.56242e-208
csn-miR530a_R-1_1ss8GA	CL11675.Contig2_All	GO:0040007	biological_process	growth	3.56242e-208
csn-miR482d-p5_2ss13CT17CT	CL6794.Contig4_All	GO:0006397	biological_process	mRNA processing	0
csn-miR482d-p5_2ss13CT17CT	CL6794.Contig4_All	GO:0009409	biological_process	response to cold	0
csn-miR482d-p5_2ss13CT17CT	CL6794.Contig4_All	GO:0009737	biological_process	response to abscisic acid	0
csn-miR482d-p5_2ss13CT17CT	CL6794.Contig4_All	GO:0045087	biological_process	innate immune response	0
csn-miR164c-5p_1ss1TG	Unigene18223_All	GO:0006351	biological_process	transcription, DNA-templated	1.02701e-263
csn-miR164c-5p_1ss1TG	Unigene18223_All	GO:0006355	biological_process	regulation of transcription, DNA-templated	1.02701e-263
csn-miR164c-5p_1ss1TG	Unigene18223_All	GO:0007275	biological_process	multicellular organism development	1.02701e-263
PC-3p-70280_26	Unigene24330_All	GO:0000719	biological_process	photoreactive repair	6.60748e-129
PC-3p-70280_26	Unigene24330_All	GO:0008150	biological_process	biological_process	6.60748e-129
csn-miR393a_1ss4AC	CL3747.Contig3_All	GO:0006468	biological_process	protein phosphorylation	9.95283e-134
csn-miR393a_1ss4AC	CL3747.Contig3_All	GO:0007169	biological_process	transmembrane receptor protein tyrosine kinase signaling pathway	9.95283e-134
csn-miR393a_1ss4AC	CL3747.Contig3_All	GO:0009734	biological_process	auxin-activated signaling pathway	9.95283e-134
csn-miR393a_1ss4AC	CL3747.Contig3_All	GO:0009742	biological_process	brassinosteroid mediated signaling pathway	9.95283e-134
csn-miR393a_1ss4AC	CL3747.Contig3_All	GO:0010051	biological_process	xylem and phloem pattern formation	9.95283e-134
csn-miR393a_1ss4AC	CL3747.Contig3_All	GO:0010233	biological_process	phloem transport	9.95283e-134
csn-miR393a_1ss4AC	CL3747.Contig3_All	GO:0010305	biological_process	leaf vascular tissue pattern formation	9.95283e-134
csn-miR406-p3_2ss4AG18TG	CL9493.Contig2_All	GO:0007018	biological_process	microtubule-based movement	2.06423e-151
csn-miR530a_R+1_1ss8GA	CL11675.Contig2_All	GO:0006352	biological_process	DNA-templated transcription, initiation	3.56242e-208
csn-miR530a_R+1_1ss8GA	CL11675.Contig2_All	GO:0006355	biological_process	regulation of transcription, DNA-templated	3.56242e-208
csn-miR530a_R+1_1ss8GA	CL11675.Contig2_All	GO:0006368	biological_process	transcription elongation from RNA polymerase II promoter	3.56242e-208
csn-miR530a_R+1_1ss8GA	CL11675.Contig2_All	GO:0016570	biological_process	histone modification	3.56242e-208
csn-miR530a_R+1_1ss8GA	CL11675.Contig2_All	GO:0040007	biological_process	growth	3.56242e-208
csn-miR477g-p5_1ss1CT	CL3059.Contig4_All	GO:0006559	biological_process	L-phenylalanine catabolic process	3.82875e-89
csn-miR477g-p5_1ss1CT	CL3059.Contig4_All	GO:0006952	biological_process	defense response	3.82875e-89
csn-miR477g-p5_1ss1CT	CL3059.Contig4_All	GO:0006979	biological_process	response to oxidative stress	3.82875e-89
csn-miR477g-p5_1ss1CT	CL3059.Contig4_All	GO:0009611	biological_process	response to wounding	3.82875e-89
csn-miR477g-p5_1ss1CT	CL3059.Contig4_All	GO:0009699	biological_process	phenylpropanoid biosynthetic process	3.82875e-89
csn-miR477g-p5_1ss1CT	CL3059.Contig4_All	GO:0009800	biological_process	cinnamic acid biosynthetic process	3.82875e-89
csn-miR477g-p5_1ss1CT	CL3059.Contig4_All	GO:0080167	biological_process	response to karrikin	3.82875e-89
csn-miR394b_1ss3GT	CL4539.Contig2_All	GO:0010305	biological_process	leaf vascular tissue pattern formation	1.0711e-100
csn-miR394b_1ss3GT	CL4539.Contig2_All	GO:0010928	biological_process	regulation of auxin mediated signaling pathway	1.0711e-100
csn-miR394b_1ss3GT	CL4539.Contig2_All	GO:0031146	biological_process	SCF-dependent proteasomal ubiquitin-dependent protein catabolic process	1.0711e-100
csn-miR394b_1ss3GT	CL4539.Contig2_All	GO:0060776	biological_process	simple leaf morphogenesis	1.0711e-100
csn-miR399b_1ss21GA	Unigene20241_All	GO:0009252	biological_process	peptidoglycan biosynthetic process	0
csn-miR393a	CL1310.Contig2_All	GO:0009734	biological_process	auxin-activated signaling pathway	2.55256e-297
csn-miR858a_L-1R+1	Unigene1958_All	GO:0006351	biological_process	transcription, DNA-templated	0
csn-miR858a_L-1R+1	Unigene1958_All	GO:0006355	biological_process	regulation of transcription, DNA-templated	0
csn-miR858a_L-1R+1	Unigene1958_All	GO:0009611	biological_process	response to wounding	0
csn-miR858a_L-1R+1	Unigene1958_All	GO:0009651	biological_process	response to salt stress	0
csn-miR858a_L-1R+1	Unigene1958_All	GO:0009737	biological_process	response to abscisic acid	0
csn-miR858a_L-1R+1	Unigene1958_All	GO:0009751	biological_process	response to salicylic acid	0
csn-miR858a_L-1R+1	Unigene1958_All	GO:0009800	biological_process	cinnamic acid biosynthetic process	0
csn-miR858a_L-1R+1	Unigene1958_All	GO:0009892	biological_process	negative regulation of metabolic process	0
csn-miR858b_R-3	CL2876.Contig1_CKL	GO:0006351	biological_process	transcription, DNA-templated	0
csn-miR858b_R-3	CL2876.Contig1_CKL	GO:0006355	biological_process	regulation of transcription, DNA-templated	0
csn-miR858b_R-3	CL2876.Contig1_CKL	GO:0006633	biological_process	fatty acid biosynthetic process	0
csn-miR858b_R-3	CL2876.Contig1_CKL	GO:0006970	biological_process	response to osmotic stress	0
csn-miR858b_R-3	CL2876.Contig1_CKL	GO:0009813	biological_process	flavonoid biosynthetic process	0
csn-miR858b_R-3	CL2876.Contig1_CKL	GO:0010023	biological_process	proanthocyanidin biosynthetic process	0
csn-miR396b-p3_2ss7AG20AG	Unigene26234_EL	GO:0008150	biological_process	biological_process	3.29392e-239
csn-miR394b_1ss6AG	CL4539.Contig1_All	GO:0010305	biological_process	leaf vascular tissue pattern formation	1.0711e-100
csn-miR394b_1ss6AG	CL4539.Contig1_All	GO:0010928	biological_process	regulation of auxin mediated signaling pathway	1.0711e-100
csn-miR394b_1ss6AG	CL4539.Contig1_All	GO:0031146	biological_process	SCF-dependent proteasomal ubiquitin-dependent protein catabolic process	1.0711e-100
csn-miR394b_1ss6AG	CL4539.Contig1_All	GO:0060776	biological_process	simple leaf morphogenesis	1.0711e-100
csn-miR169a_R-2	Unigene12037_All	GO:0009738	biological_process	abscisic acid-activated signaling pathway	1.91178e-117
csn-miR169a_R-2	Unigene12037_All	GO:0018105	biological_process	peptidyl-serine phosphorylation	1.91178e-117
csn-miR169a_R-2	Unigene12037_All	GO:0035556	biological_process	intracellular signal transduction	1.91178e-117
csn-miR169a_R-2	Unigene12037_All	GO:0046777	biological_process	protein autophosphorylation	1.91178e-117
csn-miR166a_R+2_2	CL6740.Contig4_All	GO:0006351	biological_process	transcription, DNA-templated	4.79191e-125
csn-miR166a_R+2_2	CL6740.Contig4_All	GO:0006355	biological_process	regulation of transcription, DNA-templated	4.79191e-125
csn-miR166a_R+2_2	CL6740.Contig4_All	GO:0009855	biological_process	determination of bilateral symmetry	4.79191e-125
csn-miR166a_R+2_2	CL6740.Contig4_All	GO:0009944	biological_process	polarity specification of adaxial/abaxial axis	4.79191e-125
csn-miR166a_R+2_2	CL6740.Contig4_All	GO:0009956	biological_process	radial pattern formation	4.79191e-125
csn-miR166a_R+2_2	CL6740.Contig4_All	GO:0010014	biological_process	meristem initiation	4.79191e-125
csn-miR166a_R+2_2	CL6740.Contig4_All	GO:0010051	biological_process	xylem and phloem pattern formation	4.79191e-125
csn-miR166a_R+2_2	CL6740.Contig4_All	GO:0010089	biological_process	xylem development	4.79191e-125
csn-miR166a_R+2_2	CL6740.Contig4_All	GO:0030154	biological_process	cell differentiation	4.79191e-125
csn-miR530a_R-1_1ss8GA	Unigene32099_CKL	GO:0006260	biological_process	DNA replication	7.14416e-114
csn-miR530a_R-1_1ss8GA	Unigene32099_CKL	GO:0006281	biological_process	DNA repair	7.14416e-114
csn-miR530a_R-1_1ss8GA	Unigene32099_CKL	GO:0006351	biological_process	transcription, DNA-templated	7.14416e-114
csn-miR530a_R-1_1ss8GA	Unigene32099_CKL	GO:0006355	biological_process	regulation of transcription, DNA-templated	7.14416e-114
csn-miR530a_R-1_1ss8GA	Unigene32099_CKL	GO:0006790	biological_process	sulfur compound metabolic process	7.14416e-114
csn-miR530a_R-1_1ss8GA	Unigene32099_CKL	GO:0009150	biological_process	purine ribonucleotide metabolic process	7.14416e-114
csn-miR162a-3p	CL11508.Contig2_All	GO:0030422	biological_process	production of siRNA involved in RNA interference	9.50821e-198
csn-miR165a-p5_2ss15AT19CT	CL10714.Contig3_All	GO:0006351	biological_process	transcription, DNA-templated	1.35153e-116
csn-miR165a-p5_2ss15AT19CT	CL10714.Contig3_All	GO:0006355	biological_process	regulation of transcription, DNA-templated	1.35153e-116
csn-miR165a-p5_2ss15AT19CT	CL10714.Contig3_All	GO:0009855	biological_process	determination of bilateral symmetry	1.35153e-116
csn-miR165a-p5_2ss15AT19CT	CL10714.Contig3_All	GO:0009887	biological_process	organ morphogenesis	1.35153e-116
csn-miR165a-p5_2ss15AT19CT	CL10714.Contig3_All	GO:0009965	biological_process	leaf morphogenesis	1.35153e-116
csn-miR165a-p5_2ss15AT19CT	CL10714.Contig3_All	GO:0010014	biological_process	meristem initiation	1.35153e-116
csn-miR165a-p5_2ss15AT19CT	CL10714.Contig3_All	GO:0010073	biological_process	meristem maintenance	1.35153e-116
csn-miR165a-p5_2ss15AT19CT	CL10714.Contig3_All	GO:0010075	biological_process	regulation of meristem growth	1.35153e-116
csn-miR165a-p5_2ss15AT19CT	CL10714.Contig3_All	GO:0010087	biological_process	phloem or xylem histogenesis	1.35153e-116
csn-miR165a-p5_2ss15AT19CT	CL10714.Contig3_All	GO:0030154	biological_process	cell differentiation	1.35153e-116
csn-miR165a-p5_2ss15AT19CT	CL10714.Contig3_All	GO:0048263	biological_process	determination of dorsal identity	1.35153e-116
csn-miR165a-p5_2ss15AT19CT	CL10714.Contig3_All	GO:0080060	biological_process	integument development	1.35153e-116
csn-miR477g-p5_1ss1CT	CL3059.Contig22_All	GO:0006559	biological_process	L-phenylalanine catabolic process	3.82875e-89
csn-miR477g-p5_1ss1CT	CL3059.Contig22_All	GO:0006952	biological_process	defense response	3.82875e-89
csn-miR477g-p5_1ss1CT	CL3059.Contig22_All	GO:0006979	biological_process	response to oxidative stress	3.82875e-89
csn-miR477g-p5_1ss1CT	CL3059.Contig22_All	GO:0009611	biological_process	response to wounding	3.82875e-89
csn-miR477g-p5_1ss1CT	CL3059.Contig22_All	GO:0009699	biological_process	phenylpropanoid biosynthetic process	3.82875e-89
csn-miR477g-p5_1ss1CT	CL3059.Contig22_All	GO:0009800	biological_process	cinnamic acid biosynthetic process	3.82875e-89
csn-miR477g-p5_1ss1CT	CL3059.Contig22_All	GO:0080167	biological_process	response to karrikin	3.82875e-89
csn-miR319a_R-1	Unigene16900_All	GO:0006468	biological_process	protein phosphorylation	0
csn-miR319a_R-1	Unigene16900_All	GO:0007169	biological_process	transmembrane receptor protein tyrosine kinase signaling pathway	0
csn-miR172k	CL42.Contig1_All	GO:0006351	biological_process	transcription, DNA-templated	1.27087e-272
csn-miR172k	CL42.Contig1_All	GO:0006355	biological_process	regulation of transcription, DNA-templated	1.27087e-272
csn-miR172k	CL42.Contig1_All	GO:0008150	biological_process	biological_process	1.27087e-272
csn-miR172k	CL42.Contig1_All	GO:0009908	biological_process	flower development	1.27087e-272
csn-miR172k	CL42.Contig1_All	GO:0010073	biological_process	meristem maintenance	1.27087e-272
csn-miR172k	CL42.Contig1_All	GO:0010093	biological_process	specification of floral organ identity	1.27087e-272
csn-miR172k	CL42.Contig1_All	GO:0019953	biological_process	sexual reproduction	1.27087e-272
csn-miR172k	CL42.Contig1_All	GO:0030154	biological_process	cell differentiation	1.27087e-272
csn-miR172k	CL42.Contig1_All	GO:0048316	biological_process	seed development	1.27087e-272
csn-miR172k	CL42.Contig1_All	GO:0048481	biological_process	plant ovule development	1.27087e-272
csn-miR399a_1ss13AT	Unigene20241_All	GO:0009252	biological_process	peptidoglycan biosynthetic process	0
csn-miR164a-p3_2ss15CG18CG	CL2841.Contig2_All	GO:0045903	biological_process	positive regulation of translational fidelity	2.5491e-81
csn-miR394b_1ss14CA	CL4539.Contig1_All	GO:0010305	biological_process	leaf vascular tissue pattern formation	1.0711e-100
csn-miR394b_1ss14CA	CL4539.Contig1_All	GO:0010928	biological_process	regulation of auxin mediated signaling pathway	1.0711e-100
csn-miR394b_1ss14CA	CL4539.Contig1_All	GO:0031146	biological_process	SCF-dependent proteasomal ubiquitin-dependent protein catabolic process	1.0711e-100
csn-miR394b_1ss14CA	CL4539.Contig1_All	GO:0060776	biological_process	simple leaf morphogenesis	1.0711e-100
csn-miR164a_L+1_1	Unigene42652_All	GO:0006351	biological_process	transcription, DNA-templated	1.7297e-189
csn-miR164a_L+1_1	Unigene42652_All	GO:0006355	biological_process	regulation of transcription, DNA-templated	1.7297e-189
csn-miR164a_L+1_1	Unigene42652_All	GO:0007275	biological_process	multicellular organism development	1.7297e-189
csn-miR477g-p5_2ss1CT22CT	CL3059.Contig24_All	GO:0006559	biological_process	L-phenylalanine catabolic process	3.82875e-89
csn-miR477g-p5_2ss1CT22CT	CL3059.Contig24_All	GO:0006952	biological_process	defense response	3.82875e-89
csn-miR477g-p5_2ss1CT22CT	CL3059.Contig24_All	GO:0006979	biological_process	response to oxidative stress	3.82875e-89
csn-miR477g-p5_2ss1CT22CT	CL3059.Contig24_All	GO:0009555	biological_process	pollen development	3.82875e-89
csn-miR477g-p5_2ss1CT22CT	CL3059.Contig24_All	GO:0009611	biological_process	response to wounding	3.82875e-89
csn-miR477g-p5_2ss1CT22CT	CL3059.Contig24_All	GO:0009699	biological_process	phenylpropanoid biosynthetic process	3.82875e-89
csn-miR477g-p5_2ss1CT22CT	CL3059.Contig24_All	GO:0009800	biological_process	cinnamic acid biosynthetic process	3.82875e-89
csn-miR477g-p5_2ss1CT22CT	CL3059.Contig24_All	GO:0009819	biological_process	drought recovery	3.82875e-89
csn-miR477g-p5_2ss1CT22CT	CL3059.Contig24_All	GO:0010224	biological_process	response to UV-B	3.82875e-89
csn-miR477g-p5_2ss1CT22CT	CL3059.Contig24_All	GO:0046244	biological_process	salicylic acid catabolic process	3.82875e-89
csn-miR477g-p5_2ss1CT22CT	CL3059.Contig24_All	GO:0046274	biological_process	lignin catabolic process	3.82875e-89
csn-miR477g-p5_2ss1CT22CT	CL3059.Contig24_All	GO:0080167	biological_process	response to karrikin	3.82875e-89
PC-5p-73102_25	CL4854.Contig2_CKL	GO:0008150	biological_process	biological_process	7.14416e-114
csn-miR169a_R-2	CL531.Contig3_All	GO:0006351	biological_process	transcription, DNA-templated	5.37047e-136
csn-miR169a_R-2	CL531.Contig3_All	GO:0006355	biological_process	regulation of transcription, DNA-templated	5.37047e-136
PC-3p-66711_27	CL2514.Contig1_All	GO:0006351	biological_process	transcription, DNA-templated	4.19821e-95
PC-3p-66711_27	CL2514.Contig1_All	GO:0006355	biological_process	regulation of transcription, DNA-templated	4.19821e-95
csn-miR399i_1ss7AG	Unigene20241_All	GO:0009252	biological_process	peptidoglycan biosynthetic process	0
csn-miR171c-p5_1	CL2825.Contig3_All	GO:0006355	biological_process	regulation of transcription, DNA-templated	2.06423e-151
csn-miR171c-p5_1	CL2825.Contig3_All	GO:0009793	biological_process	embryo development ending in seed dormancy	2.06423e-151
csn-miR171c-p5_1	CL2825.Contig3_All	GO:0071452	biological_process	cellular response to singlet oxygen	2.06423e-151
PC-3p-118803_14	Unigene40258_All	GO:0006355	biological_process	regulation of transcription, DNA-templated	5.98513e-126
PC-3p-193701_7	Unigene17777_All	GO:0006897	biological_process	endocytosis	4.19821e-95
PC-3p-193701_7	Unigene17777_All	GO:0008150	biological_process	biological_process	4.19821e-95
PC-3p-193701_7	Unigene17777_All	GO:0008360	biological_process	regulation of cell shape	4.19821e-95
PC-3p-193701_7	Unigene17777_All	GO:0016055	biological_process	Wnt signaling pathway	4.19821e-95
PC-3p-193701_7	Unigene17777_All	GO:0018105	biological_process	peptidyl-serine phosphorylation	4.19821e-95
csn-miR394a_R-1_1ss21AT	CL4539.Contig2_All	GO:0010305	biological_process	leaf vascular tissue pattern formation	1.0711e-100
csn-miR394a_R-1_1ss21AT	CL4539.Contig2_All	GO:0010928	biological_process	regulation of auxin mediated signaling pathway	1.0711e-100
csn-miR394a_R-1_1ss21AT	CL4539.Contig2_All	GO:0031146	biological_process	SCF-dependent proteasomal ubiquitin-dependent protein catabolic process	1.0711e-100
csn-miR394a_R-1_1ss21AT	CL4539.Contig2_All	GO:0060776	biological_process	simple leaf morphogenesis	1.0711e-100
csn-miR169e_R-3	Unigene12037_All	GO:0009738	biological_process	abscisic acid-activated signaling pathway	1.91178e-117
csn-miR169e_R-3	Unigene12037_All	GO:0018105	biological_process	peptidyl-serine phosphorylation	1.91178e-117
csn-miR169e_R-3	Unigene12037_All	GO:0035556	biological_process	intracellular signal transduction	1.91178e-117
csn-miR169e_R-3	Unigene12037_All	GO:0046777	biological_process	protein autophosphorylation	1.91178e-117
csn-miR396e-5p	Unigene8003_All	GO:0006351	biological_process	transcription, DNA-templated	0
csn-miR396e-5p	Unigene8003_All	GO:0006355	biological_process	regulation of transcription, DNA-templated	0
csn-miR396e-5p	Unigene8003_All	GO:0009624	biological_process	response to nematode	0
csn-miR396e-5p	Unigene8003_All	GO:0048364	biological_process	root development	0
csn-miR396e-5p	Unigene8003_All	GO:0048366	biological_process	leaf development	0
csn-miR396e-5p	Unigene8003_All	GO:0061062	biological_process	regulation of nematode larval development	0
csn-miR169f_R-1_1ss20GA	CL531.Contig3_All	GO:0006351	biological_process	transcription, DNA-templated	5.37047e-136
csn-miR169f_R-1_1ss20GA	CL531.Contig3_All	GO:0006355	biological_process	regulation of transcription, DNA-templated	5.37047e-136
csn-miR396b	CL425.Contig5_All	GO:0009813	biological_process	flavonoid biosynthetic process	2.06423e-151
csn-miR396b	CL425.Contig5_All	GO:0052696	biological_process	flavonoid glucuronidation	2.06423e-151
csn-miR156b-5p_R+1	Unigene375_All	GO:0006351	biological_process	transcription, DNA-templated	9.80233e-130
csn-miR156b-5p_R+1	Unigene375_All	GO:0006355	biological_process	regulation of transcription, DNA-templated	9.80233e-130
csn-miR156b-5p_R+1	Unigene375_All	GO:0048653	biological_process	anther development	9.80233e-130
csn-miR166a-3p	Unigene33923_All	GO:0006351	biological_process	transcription, DNA-templated	1.35153e-116
csn-miR166a-3p	Unigene33923_All	GO:0006355	biological_process	regulation of transcription, DNA-templated	1.35153e-116
csn-miR166a-3p	Unigene33923_All	GO:0008284	biological_process	positive regulation of cell proliferation	1.35153e-116
csn-miR166a-3p	Unigene33923_All	GO:0009733	biological_process	response to auxin	1.35153e-116
csn-miR166a-3p	Unigene33923_All	GO:0010014	biological_process	meristem initiation	1.35153e-116
csn-miR166a-3p	Unigene33923_All	GO:0010067	biological_process	procambium histogenesis	1.35153e-116
csn-miR166a-3p	Unigene33923_All	GO:0010072	biological_process	primary shoot apical meristem specification	1.35153e-116
csn-miR166a-3p	Unigene33923_All	GO:0010089	biological_process	xylem development	1.35153e-116
csn-miR166a-3p	Unigene33923_All	GO:0030154	biological_process	cell differentiation	1.35153e-116
csn-miR166a-3p	Unigene33923_All	GO:0045597	biological_process	positive regulation of cell differentiation	1.35153e-116
csn-miR169f_R-1_2ss20TC21GT	CL531.Contig2_All	GO:0006351	biological_process	transcription, DNA-templated	5.37047e-136
csn-miR169f_R-1_2ss20TC21GT	CL531.Contig2_All	GO:0006355	biological_process	regulation of transcription, DNA-templated	5.37047e-136
csn-miR160c	Unigene26726_All	GO:0006351	biological_process	transcription, DNA-templated	6.15633e-111
csn-miR160c	Unigene26726_All	GO:0006355	biological_process	regulation of transcription, DNA-templated	6.15633e-111
csn-miR160c	Unigene26726_All	GO:0007389	biological_process	pattern specification process	6.15633e-111
csn-miR160c	Unigene26726_All	GO:0009734	biological_process	auxin-activated signaling pathway	6.15633e-111
csn-miR160c	Unigene26726_All	GO:0009738	biological_process	abscisic acid-activated signaling pathway	6.15633e-111
csn-miR160c	Unigene26726_All	GO:0009743	biological_process	response to carbohydrate	6.15633e-111
csn-miR160c	Unigene26726_All	GO:0010154	biological_process	fruit development	6.15633e-111
csn-miR160c	Unigene26726_All	GO:0031540	biological_process	regulation of anthocyanin biosynthetic process	6.15633e-111
csn-miR160c	Unigene26726_All	GO:0048366	biological_process	leaf development	6.15633e-111
csn-miR160c	Unigene26726_All	GO:0048441	biological_process	petal development	6.15633e-111
csn-miR160c	Unigene26726_All	GO:0048442	biological_process	sepal development	6.15633e-111
csn-miR160c	Unigene26726_All	GO:0048589	biological_process	developmental growth	6.15633e-111
csn-miR160c	Unigene26726_All	GO:0048829	biological_process	root cap development	6.15633e-111
csn-miR160c	Unigene26726_All	GO:0051301	biological_process	cell division	6.15633e-111
csn-miR159c-p3_2ss11CA18TG	CL8702.Contig1_All	GO:0010205	biological_process	photoinhibition	0
csn-miR159c-p3_2ss11CA18TG	CL8702.Contig1_All	GO:0010207	biological_process	photosystem II assembly	0
csn-miR159c-p3_2ss11CA18TG	CL8702.Contig1_All	GO:0019684	biological_process	photosynthesis, light reaction	0
csn-miR159c-p3_2ss11CA18TG	CL8702.Contig1_All	GO:0035304	biological_process	regulation of protein dephosphorylation	0
csn-miR159c-p3_2ss11CA18TG	CL8702.Contig1_All	GO:0042549	biological_process	photosystem II stabilization	0
PC-3p-80975_22	Unigene17777_All	GO:0006897	biological_process	endocytosis	4.19821e-95
PC-3p-80975_22	Unigene17777_All	GO:0008150	biological_process	biological_process	4.19821e-95
PC-3p-80975_22	Unigene17777_All	GO:0008360	biological_process	regulation of cell shape	4.19821e-95
PC-3p-80975_22	Unigene17777_All	GO:0016055	biological_process	Wnt signaling pathway	4.19821e-95
PC-3p-80975_22	Unigene17777_All	GO:0018105	biological_process	peptidyl-serine phosphorylation	4.19821e-95
csn-miR319a_R-1	Unigene35518_EL	GO:0006351	biological_process	transcription, DNA-templated	0
csn-miR319a_R-1	Unigene35518_EL	GO:0006355	biological_process	regulation of transcription, DNA-templated	0
csn-miR319a_R-1	Unigene35518_EL	GO:0009793	biological_process	embryo development ending in seed dormancy	0
csn-miR319a_R-1	Unigene35518_EL	GO:0009965	biological_process	leaf morphogenesis	0
csn-miR319a_R-1	Unigene35518_EL	GO:0030154	biological_process	cell differentiation	0
csn-miR319a_R-1	Unigene35518_EL	GO:0045962	biological_process	positive regulation of development, heterochronic	0
csn-miR319a_R-1	Unigene35518_EL	GO:0048366	biological_process	leaf development	0
csn-miR172k	Unigene48_All	GO:0006351	biological_process	transcription, DNA-templated	1.27087e-272
csn-miR172k	Unigene48_All	GO:0006355	biological_process	regulation of transcription, DNA-templated	1.27087e-272
csn-miR172k	Unigene48_All	GO:0009908	biological_process	flower development	1.27087e-272
csn-miR172k	Unigene48_All	GO:0010073	biological_process	meristem maintenance	1.27087e-272
csn-miR172k	Unigene48_All	GO:0010093	biological_process	specification of floral organ identity	1.27087e-272
csn-miR172k	Unigene48_All	GO:0019953	biological_process	sexual reproduction	1.27087e-272
csn-miR172k	Unigene48_All	GO:0030154	biological_process	cell differentiation	1.27087e-272
csn-miR172k	Unigene48_All	GO:0048316	biological_process	seed development	1.27087e-272
csn-miR172k	Unigene48_All	GO:0048481	biological_process	plant ovule development	1.27087e-272
csn-miR166a_R+2_1ss1TG	CL6740.Contig3_All	GO:0006351	biological_process	transcription, DNA-templated	4.79191e-125
csn-miR166a_R+2_1ss1TG	CL6740.Contig3_All	GO:0006355	biological_process	regulation of transcription, DNA-templated	4.79191e-125
csn-miR166a_R+2_1ss1TG	CL6740.Contig3_All	GO:0009855	biological_process	determination of bilateral symmetry	4.79191e-125
csn-miR166a_R+2_1ss1TG	CL6740.Contig3_All	GO:0009944	biological_process	polarity specification of adaxial/abaxial axis	4.79191e-125
csn-miR166a_R+2_1ss1TG	CL6740.Contig3_All	GO:0009956	biological_process	radial pattern formation	4.79191e-125
csn-miR166a_R+2_1ss1TG	CL6740.Contig3_All	GO:0010014	biological_process	meristem initiation	4.79191e-125
csn-miR166a_R+2_1ss1TG	CL6740.Contig3_All	GO:0010051	biological_process	xylem and phloem pattern formation	4.79191e-125
csn-miR166a_R+2_1ss1TG	CL6740.Contig3_All	GO:0010089	biological_process	xylem development	4.79191e-125
csn-miR166a_R+2_1ss1TG	CL6740.Contig3_All	GO:0030154	biological_process	cell differentiation	4.79191e-125
csn-miR169e_R-2_1ss13AG	CL531.Contig3_All	GO:0006351	biological_process	transcription, DNA-templated	5.37047e-136
csn-miR169e_R-2_1ss13AG	CL531.Contig3_All	GO:0006355	biological_process	regulation of transcription, DNA-templated	5.37047e-136
PC-3p-182507_8	Unigene17777_All	GO:0006897	biological_process	endocytosis	4.19821e-95
PC-3p-182507_8	Unigene17777_All	GO:0008150	biological_process	biological_process	4.19821e-95
PC-3p-182507_8	Unigene17777_All	GO:0008360	biological_process	regulation of cell shape	4.19821e-95
PC-3p-182507_8	Unigene17777_All	GO:0016055	biological_process	Wnt signaling pathway	4.19821e-95
PC-3p-182507_8	Unigene17777_All	GO:0018105	biological_process	peptidyl-serine phosphorylation	4.19821e-95
csn-miR399a-3p_R+1_1ss20GC	Unigene20241_All	GO:0009252	biological_process	peptidoglycan biosynthetic process	2.85651e-174
csn-miR319g_L+1R-2	Unigene46763_All	GO:0007015	biological_process	actin filament organization	4.0546e-135
csn-miR319g_L+1R-2	Unigene46763_All	GO:0009903	biological_process	chloroplast avoidance movement	4.0546e-135
csn-miR319g_L+1R-2	Unigene46763_All	GO:0009904	biological_process	chloroplast accumulation movement	4.0546e-135
csn-miR319g_L+1R-2	Unigene46763_All	GO:0071483	biological_process	cellular response to blue light	4.0546e-135
csn-miR172d_L-2	Unigene48_All	GO:0006351	biological_process	transcription, DNA-templated	1.27087e-272
csn-miR172d_L-2	Unigene48_All	GO:0006355	biological_process	regulation of transcription, DNA-templated	1.27087e-272
csn-miR172d_L-2	Unigene48_All	GO:0009908	biological_process	flower development	1.27087e-272
csn-miR172d_L-2	Unigene48_All	GO:0010073	biological_process	meristem maintenance	1.27087e-272
csn-miR172d_L-2	Unigene48_All	GO:0010093	biological_process	specification of floral organ identity	1.27087e-272
csn-miR172d_L-2	Unigene48_All	GO:0019953	biological_process	sexual reproduction	1.27087e-272
csn-miR172d_L-2	Unigene48_All	GO:0030154	biological_process	cell differentiation	1.27087e-272
csn-miR172d_L-2	Unigene48_All	GO:0048316	biological_process	seed development	1.27087e-272
csn-miR172d_L-2	Unigene48_All	GO:0048481	biological_process	plant ovule development	1.27087e-272
csn-miR399e_1ss21GA	Unigene20241_All	GO:0009252	biological_process	peptidoglycan biosynthetic process	0
csn-miR159c_1ss20TC	Unigene46763_All	GO:0007015	biological_process	actin filament organization	4.0546e-135
csn-miR159c_1ss20TC	Unigene46763_All	GO:0009903	biological_process	chloroplast avoidance movement	4.0546e-135
csn-miR159c_1ss20TC	Unigene46763_All	GO:0009904	biological_process	chloroplast accumulation movement	4.0546e-135
csn-miR159c_1ss20TC	Unigene46763_All	GO:0071483	biological_process	cellular response to blue light	4.0546e-135
csn-miR399e	Unigene20241_All	GO:0009252	biological_process	peptidoglycan biosynthetic process	0
csn-miR396b-p3_2ss18AT19CT	Unigene8003_All	GO:0006351	biological_process	transcription, DNA-templated	0
csn-miR396b-p3_2ss18AT19CT	Unigene8003_All	GO:0006355	biological_process	regulation of transcription, DNA-templated	0
csn-miR396b-p3_2ss18AT19CT	Unigene8003_All	GO:0009624	biological_process	response to nematode	0
csn-miR396b-p3_2ss18AT19CT	Unigene8003_All	GO:0048364	biological_process	root development	0
csn-miR396b-p3_2ss18AT19CT	Unigene8003_All	GO:0048366	biological_process	leaf development	0
csn-miR396b-p3_2ss18AT19CT	Unigene8003_All	GO:0061062	biological_process	regulation of nematode larval development	0
csn-miR395a_1ss19CT	CL12050.Contig1_All	GO:0000103	biological_process	sulfate assimilation	0
csn-miR396b-p3_2ss18AT19CT	CL3768.Contig1_All	GO:0001731	biological_process	formation of translation preinitiation complex	2.06423e-151
csn-miR396b-p3_2ss18AT19CT	CL3768.Contig1_All	GO:0006446	biological_process	regulation of translational initiation	2.06423e-151
csn-miR396b-p3_2ss18AT19CT	CL3768.Contig1_All	GO:0009651	biological_process	response to salt stress	2.06423e-151
csn-miR396b-p3_2ss18AT19CT	CL3768.Contig1_All	GO:0046686	biological_process	response to cadmium ion	2.06423e-151
csn-miR396b_R+1_1	CL425.Contig5_All	GO:0009813	biological_process	flavonoid biosynthetic process	2.06423e-151
csn-miR396b_R+1_1	CL425.Contig5_All	GO:0052696	biological_process	flavonoid glucuronidation	2.06423e-151
csn-miR164a-p5_2ss15CG18CG	CL2841.Contig2_All	GO:0045903	biological_process	positive regulation of translational fidelity	2.5491e-81
csn-miR166a_R+2_1ss1TG	CL10714.Contig3_All	GO:0006351	biological_process	transcription, DNA-templated	1.35153e-116
csn-miR166a_R+2_1ss1TG	CL10714.Contig3_All	GO:0006355	biological_process	regulation of transcription, DNA-templated	1.35153e-116
csn-miR166a_R+2_1ss1TG	CL10714.Contig3_All	GO:0009855	biological_process	determination of bilateral symmetry	1.35153e-116
csn-miR166a_R+2_1ss1TG	CL10714.Contig3_All	GO:0009887	biological_process	organ morphogenesis	1.35153e-116
csn-miR166a_R+2_1ss1TG	CL10714.Contig3_All	GO:0009965	biological_process	leaf morphogenesis	1.35153e-116
csn-miR166a_R+2_1ss1TG	CL10714.Contig3_All	GO:0010014	biological_process	meristem initiation	1.35153e-116
csn-miR166a_R+2_1ss1TG	CL10714.Contig3_All	GO:0010073	biological_process	meristem maintenance	1.35153e-116
csn-miR166a_R+2_1ss1TG	CL10714.Contig3_All	GO:0010075	biological_process	regulation of meristem growth	1.35153e-116
csn-miR166a_R+2_1ss1TG	CL10714.Contig3_All	GO:0010087	biological_process	phloem or xylem histogenesis	1.35153e-116
csn-miR166a_R+2_1ss1TG	CL10714.Contig3_All	GO:0030154	biological_process	cell differentiation	1.35153e-116
csn-miR166a_R+2_1ss1TG	CL10714.Contig3_All	GO:0048263	biological_process	determination of dorsal identity	1.35153e-116
csn-miR166a_R+2_1ss1TG	CL10714.Contig3_All	GO:0080060	biological_process	integument development	1.35153e-116
csn-miR477a_L+1_2ss2AT22AC	CL10706.Contig1_All	GO:0006207	biological_process	'de novo' pyrimidine nucleobase biosynthetic process	0
csn-miR477a_L+1_2ss2AT22AC	CL10706.Contig1_All	GO:0006221	biological_process	pyrimidine nucleotide biosynthetic process	0
csn-miR477a_L+1_2ss2AT22AC	CL10706.Contig1_All	GO:0009173	biological_process	pyrimidine ribonucleoside monophosphate metabolic process	0
csn-miR169k_R-1_2ss18CT20GC	CL531.Contig3_All	GO:0006351	biological_process	transcription, DNA-templated	5.37047e-136
csn-miR169k_R-1_2ss18CT20GC	CL531.Contig3_All	GO:0006355	biological_process	regulation of transcription, DNA-templated	5.37047e-136
csn-miR164a-p3_2ss15CG18CG	CL1252.Contig1_All	GO:0006952	biological_process	defense response	2.32248e-185
csn-miR164a-p3_2ss15CG18CG	CL1252.Contig1_All	GO:0009626	biological_process	plant-type hypersensitive response	2.32248e-185
csn-miR164a-p3_2ss15CG18CG	CL1252.Contig1_All	GO:0016045	biological_process	detection of bacterium	2.32248e-185
csn-miR164a-p3_2ss15CG18CG	CL1252.Contig1_All	GO:0042742	biological_process	defense response to bacterium	2.32248e-185
csn-miR164c-5p_1ss1TG	Unigene42652_All	GO:0006351	biological_process	transcription, DNA-templated	0
csn-miR164c-5p_1ss1TG	Unigene42652_All	GO:0006355	biological_process	regulation of transcription, DNA-templated	0
csn-miR164c-5p_1ss1TG	Unigene42652_All	GO:0007275	biological_process	multicellular organism development	0
csn-miR166a_R+2_1	CL10714.Contig3_All	GO:0006351	biological_process	transcription, DNA-templated	1.35153e-116
csn-miR166a_R+2_1	CL10714.Contig3_All	GO:0006355	biological_process	regulation of transcription, DNA-templated	1.35153e-116
csn-miR166a_R+2_1	CL10714.Contig3_All	GO:0009855	biological_process	determination of bilateral symmetry	1.35153e-116
csn-miR166a_R+2_1	CL10714.Contig3_All	GO:0009887	biological_process	organ morphogenesis	1.35153e-116
csn-miR166a_R+2_1	CL10714.Contig3_All	GO:0009965	biological_process	leaf morphogenesis	1.35153e-116
csn-miR166a_R+2_1	CL10714.Contig3_All	GO:0010014	biological_process	meristem initiation	1.35153e-116
csn-miR166a_R+2_1	CL10714.Contig3_All	GO:0010073	biological_process	meristem maintenance	1.35153e-116
csn-miR166a_R+2_1	CL10714.Contig3_All	GO:0010075	biological_process	regulation of meristem growth	1.35153e-116
csn-miR166a_R+2_1	CL10714.Contig3_All	GO:0010087	biological_process	phloem or xylem histogenesis	1.35153e-116
csn-miR166a_R+2_1	CL10714.Contig3_All	GO:0030154	biological_process	cell differentiation	1.35153e-116
csn-miR166a_R+2_1	CL10714.Contig3_All	GO:0048263	biological_process	determination of dorsal identity	1.35153e-116
csn-miR166a_R+2_1	CL10714.Contig3_All	GO:0080060	biological_process	integument development	1.35153e-116
csn-miR169e_R-3	CL531.Contig2_All	GO:0006351	biological_process	transcription, DNA-templated	5.37047e-136
csn-miR169e_R-3	CL531.Contig2_All	GO:0006355	biological_process	regulation of transcription, DNA-templated	5.37047e-136
csn-miR396b-p5_2ss18AT19CT	CL3768.Contig1_All	GO:0001731	biological_process	formation of translation preinitiation complex	2.06423e-151
csn-miR396b-p5_2ss18AT19CT	CL3768.Contig1_All	GO:0006446	biological_process	regulation of translational initiation	2.06423e-151
csn-miR396b-p5_2ss18AT19CT	CL3768.Contig1_All	GO:0009651	biological_process	response to salt stress	2.06423e-151
csn-miR396b-p5_2ss18AT19CT	CL3768.Contig1_All	GO:0046686	biological_process	response to cadmium ion	2.06423e-151
csn-miR166a_R+2_1	CL6740.Contig2_All	GO:0006351	biological_process	transcription, DNA-templated	4.79191e-125
csn-miR166a_R+2_1	CL6740.Contig2_All	GO:0006355	biological_process	regulation of transcription, DNA-templated	4.79191e-125
csn-miR166a_R+2_1	CL6740.Contig2_All	GO:0009855	biological_process	determination of bilateral symmetry	4.79191e-125
csn-miR166a_R+2_1	CL6740.Contig2_All	GO:0009944	biological_process	polarity specification of adaxial/abaxial axis	4.79191e-125
csn-miR166a_R+2_1	CL6740.Contig2_All	GO:0009956	biological_process	radial pattern formation	4.79191e-125
csn-miR166a_R+2_1	CL6740.Contig2_All	GO:0010014	biological_process	meristem initiation	4.79191e-125
csn-miR166a_R+2_1	CL6740.Contig2_All	GO:0010051	biological_process	xylem and phloem pattern formation	4.79191e-125
csn-miR166a_R+2_1	CL6740.Contig2_All	GO:0010089	biological_process	xylem development	4.79191e-125
csn-miR166a_R+2_1	CL6740.Contig2_All	GO:0030154	biological_process	cell differentiation	4.79191e-125
csn-miR160c-p5_2ss13AG17AG	CL5722.Contig3_All	GO:0000024	biological_process	maltose biosynthetic process	9.27819e-231
csn-miR160c-p5_2ss13AG17AG	CL5722.Contig3_All	GO:0005983	biological_process	starch catabolic process	9.27819e-231
csn-miR160c-p5_2ss13AG17AG	CL5722.Contig3_All	GO:0009409	biological_process	response to cold	9.27819e-231
csn-miR164a_1ss13GT	Unigene42652_All	GO:0006351	biological_process	transcription, DNA-templated	0
csn-miR164a_1ss13GT	Unigene42652_All	GO:0006355	biological_process	regulation of transcription, DNA-templated	0
csn-miR164a_1ss13GT	Unigene42652_All	GO:0007275	biological_process	multicellular organism development	0
PC-3p-32021_60	CL2514.Contig1_All	GO:0006351	biological_process	transcription, DNA-templated	4.19821e-95
PC-3p-32021_60	CL2514.Contig1_All	GO:0006355	biological_process	regulation of transcription, DNA-templated	4.19821e-95
csn-miR319b_R-1	CL13487.Contig3_All	GO:0006351	biological_process	transcription, DNA-templated	0
csn-miR319b_R-1	CL13487.Contig3_All	GO:0006355	biological_process	regulation of transcription, DNA-templated	0
csn-miR319b_R-1	CL13487.Contig3_All	GO:0009793	biological_process	embryo development ending in seed dormancy	0
csn-miR319b_R-1	CL13487.Contig3_All	GO:0009965	biological_process	leaf morphogenesis	0
csn-miR319b_R-1	CL13487.Contig3_All	GO:0030154	biological_process	cell differentiation	0
csn-miR319b_R-1	CL13487.Contig3_All	GO:0045962	biological_process	positive regulation of development, heterochronic	0
csn-miR319b_R-1	CL13487.Contig3_All	GO:0048366	biological_process	leaf development	0
csn-miR2592bj-p3_1ss12TC	CL408.Contig1_All	GO:0008150	biological_process	biological_process	0
csn-miR2592bj-p3_1ss12TC	CL408.Contig1_All	GO:0034314	biological_process	Arp2/3 complex-mediated actin nucleation	0
csn-miR169i_R+1	CL531.Contig2_All	GO:0006351	biological_process	transcription, DNA-templated	5.37047e-136
csn-miR169i_R+1	CL531.Contig2_All	GO:0006355	biological_process	regulation of transcription, DNA-templated	5.37047e-136
csn-miR169q_R-2	CL531.Contig2_All	GO:0006351	biological_process	transcription, DNA-templated	5.37047e-136
csn-miR169q_R-2	CL531.Contig2_All	GO:0006355	biological_process	regulation of transcription, DNA-templated	5.37047e-136
PC-5p-67501_27	CL3167.Contig1_All	GO:0008150	biological_process	biological_process	1.04041e-84
csn-miR169x	CL531.Contig3_All	GO:0006351	biological_process	transcription, DNA-templated	5.37047e-136
csn-miR169x	CL531.Contig3_All	GO:0006355	biological_process	regulation of transcription, DNA-templated	5.37047e-136
csn-miR319b_R-1	Unigene35518_EL	GO:0006351	biological_process	transcription, DNA-templated	0
csn-miR319b_R-1	Unigene35518_EL	GO:0006355	biological_process	regulation of transcription, DNA-templated	0
csn-miR319b_R-1	Unigene35518_EL	GO:0009793	biological_process	embryo development ending in seed dormancy	0
csn-miR319b_R-1	Unigene35518_EL	GO:0009965	biological_process	leaf morphogenesis	0
csn-miR319b_R-1	Unigene35518_EL	GO:0030154	biological_process	cell differentiation	0
csn-miR319b_R-1	Unigene35518_EL	GO:0045962	biological_process	positive regulation of development, heterochronic	0
csn-miR319b_R-1	Unigene35518_EL	GO:0048366	biological_process	leaf development	0
csn-miR165a-p5_2ss15AT19CT	CL6740.Contig4_All	GO:0006351	biological_process	transcription, DNA-templated	4.79191e-125
csn-miR165a-p5_2ss15AT19CT	CL6740.Contig4_All	GO:0006355	biological_process	regulation of transcription, DNA-templated	4.79191e-125
csn-miR165a-p5_2ss15AT19CT	CL6740.Contig4_All	GO:0009855	biological_process	determination of bilateral symmetry	4.79191e-125
csn-miR165a-p5_2ss15AT19CT	CL6740.Contig4_All	GO:0009944	biological_process	polarity specification of adaxial/abaxial axis	4.79191e-125
csn-miR165a-p5_2ss15AT19CT	CL6740.Contig4_All	GO:0009956	biological_process	radial pattern formation	4.79191e-125
csn-miR165a-p5_2ss15AT19CT	CL6740.Contig4_All	GO:0010014	biological_process	meristem initiation	4.79191e-125
csn-miR165a-p5_2ss15AT19CT	CL6740.Contig4_All	GO:0010051	biological_process	xylem and phloem pattern formation	4.79191e-125
csn-miR165a-p5_2ss15AT19CT	CL6740.Contig4_All	GO:0010089	biological_process	xylem development	4.79191e-125
csn-miR165a-p5_2ss15AT19CT	CL6740.Contig4_All	GO:0030154	biological_process	cell differentiation	4.79191e-125
PC-3p-114893_14	CL3619.Contig2_All	GO:0006351	biological_process	transcription, DNA-templated	4.53506e-166
PC-3p-114893_14	CL3619.Contig2_All	GO:0006355	biological_process	regulation of transcription, DNA-templated	4.53506e-166
PC-3p-114893_14	CL3619.Contig2_All	GO:0006473	biological_process	protein acetylation	4.53506e-166
PC-3p-114893_14	CL3619.Contig2_All	GO:0006508	biological_process	proteolysis	4.53506e-166
PC-3p-114893_14	CL3619.Contig2_All	GO:0009908	biological_process	flower development	4.53506e-166
PC-3p-114893_14	CL3619.Contig2_All	GO:0016573	biological_process	histone acetylation	4.53506e-166
csn-miR156f_1ss12TA	Unigene375_All	GO:0006351	biological_process	transcription, DNA-templated	4.96795e-227
csn-miR156f_1ss12TA	Unigene375_All	GO:0006355	biological_process	regulation of transcription, DNA-templated	4.96795e-227
csn-miR156f_1ss12TA	Unigene375_All	GO:0048653	biological_process	anther development	4.96795e-227
PC-3p-70854_26	Unigene17777_All	GO:0006897	biological_process	endocytosis	4.19821e-95
PC-3p-70854_26	Unigene17777_All	GO:0008150	biological_process	biological_process	4.19821e-95
PC-3p-70854_26	Unigene17777_All	GO:0008360	biological_process	regulation of cell shape	4.19821e-95
PC-3p-70854_26	Unigene17777_All	GO:0016055	biological_process	Wnt signaling pathway	4.19821e-95
PC-3p-70854_26	Unigene17777_All	GO:0018105	biological_process	peptidyl-serine phosphorylation	4.19821e-95
csn-miR172c	CL7513.Contig3_All	GO:0006351	biological_process	transcription, DNA-templated	2.06423e-151
csn-miR172c	CL7513.Contig3_All	GO:0006355	biological_process	regulation of transcription, DNA-templated	2.06423e-151
csn-miR396b-p3_2ss18AT19CT	CL2998.Contig2_All	GO:0006468	biological_process	protein phosphorylation	0
csn-miR396b-p3_2ss18AT19CT	CL2998.Contig2_All	GO:0007169	biological_process	transmembrane receptor protein tyrosine kinase signaling pathway	0
csn-miR396b-p3_2ss18AT19CT	CL2998.Contig2_All	GO:0009408	biological_process	response to heat	0
csn-miR396b-p3_2ss18AT19CT	CL2998.Contig2_All	GO:0009409	biological_process	response to cold	0
csn-miR396b-p3_2ss18AT19CT	CL2998.Contig2_All	GO:0046677	biological_process	response to antibiotic	0
csn-miR172k_1ss5TA	CL7513.Contig3_All	GO:0006351	biological_process	transcription, DNA-templated	2.06423e-151
csn-miR172k_1ss5TA	CL7513.Contig3_All	GO:0006355	biological_process	regulation of transcription, DNA-templated	2.06423e-151
csn-miR408-p3_2ss18GT19GT	CL2303.Contig1_All	GO:0006508	biological_process	proteolysis	8.63272e-111
csn-miR172c	Unigene48_All	GO:0006351	biological_process	transcription, DNA-templated	1.27087e-272
csn-miR172c	Unigene48_All	GO:0006355	biological_process	regulation of transcription, DNA-templated	1.27087e-272
csn-miR172c	Unigene48_All	GO:0009908	biological_process	flower development	1.27087e-272
csn-miR172c	Unigene48_All	GO:0010073	biological_process	meristem maintenance	1.27087e-272
csn-miR172c	Unigene48_All	GO:0010093	biological_process	specification of floral organ identity	1.27087e-272
csn-miR172c	Unigene48_All	GO:0019953	biological_process	sexual reproduction	1.27087e-272
csn-miR172c	Unigene48_All	GO:0030154	biological_process	cell differentiation	1.27087e-272
csn-miR172c	Unigene48_All	GO:0048316	biological_process	seed development	1.27087e-272
csn-miR172c	Unigene48_All	GO:0048481	biological_process	plant ovule development	1.27087e-272
csn-miR530a_R+1_1ss20TG	CL11675.Contig1_All	GO:0006352	biological_process	DNA-templated transcription, initiation	3.56242e-208
csn-miR530a_R+1_1ss20TG	CL11675.Contig1_All	GO:0006355	biological_process	regulation of transcription, DNA-templated	3.56242e-208
csn-miR530a_R+1_1ss20TG	CL11675.Contig1_All	GO:0006368	biological_process	transcription elongation from RNA polymerase II promoter	3.56242e-208
csn-miR530a_R+1_1ss20TG	CL11675.Contig1_All	GO:0016570	biological_process	histone modification	3.56242e-208
csn-miR530a_R+1_1ss20TG	CL11675.Contig1_All	GO:0040007	biological_process	growth	3.56242e-208
csn-miR530a_R+1_1ss20TG	CL11675.Contig2_All	GO:0006352	biological_process	DNA-templated transcription, initiation	3.56242e-208
csn-miR530a_R+1_1ss20TG	CL11675.Contig2_All	GO:0006355	biological_process	regulation of transcription, DNA-templated	3.56242e-208
csn-miR530a_R+1_1ss20TG	CL11675.Contig2_All	GO:0006368	biological_process	transcription elongation from RNA polymerase II promoter	3.56242e-208
csn-miR530a_R+1_1ss20TG	CL11675.Contig2_All	GO:0016570	biological_process	histone modification	3.56242e-208
csn-miR530a_R+1_1ss20TG	CL11675.Contig2_All	GO:0040007	biological_process	growth	3.56242e-208
PC-3p-102350_16	CL756.Contig1_All	GO:0008150	biological_process	biological_process	4.03445e-162
csn-miR166a_R+2_3	CL6740.Contig2_All	GO:0006351	biological_process	transcription, DNA-templated	4.79191e-125
csn-miR166a_R+2_3	CL6740.Contig2_All	GO:0006355	biological_process	regulation of transcription, DNA-templated	4.79191e-125
csn-miR166a_R+2_3	CL6740.Contig2_All	GO:0009855	biological_process	determination of bilateral symmetry	4.79191e-125
csn-miR166a_R+2_3	CL6740.Contig2_All	GO:0009944	biological_process	polarity specification of adaxial/abaxial axis	4.79191e-125
csn-miR166a_R+2_3	CL6740.Contig2_All	GO:0009956	biological_process	radial pattern formation	4.79191e-125
csn-miR166a_R+2_3	CL6740.Contig2_All	GO:0010014	biological_process	meristem initiation	4.79191e-125
csn-miR166a_R+2_3	CL6740.Contig2_All	GO:0010051	biological_process	xylem and phloem pattern formation	4.79191e-125
csn-miR166a_R+2_3	CL6740.Contig2_All	GO:0010089	biological_process	xylem development	4.79191e-125
csn-miR166a_R+2_3	CL6740.Contig2_All	GO:0030154	biological_process	cell differentiation	4.79191e-125
csn-miR169i_R+1	CL531.Contig3_All	GO:0006351	biological_process	transcription, DNA-templated	5.37047e-136
csn-miR169i_R+1	CL531.Contig3_All	GO:0006355	biological_process	regulation of transcription, DNA-templated	5.37047e-136
PC-3p-38560_50	Unigene24223_All	GO:0006366	biological_process	transcription from RNA polymerase II promoter	0
csn-miR169e_R-1_1ss21GT	CL531.Contig2_All	GO:0006351	biological_process	transcription, DNA-templated	5.37047e-136
csn-miR169e_R-1_1ss21GT	CL531.Contig2_All	GO:0006355	biological_process	regulation of transcription, DNA-templated	5.37047e-136
csn-miR164a-p5_2ss15CG18CG	CL2456.Contig6_All	GO:0009651	biological_process	response to salt stress	7.39702e-99
csn-miR164a-p5_2ss15CG18CG	CL2456.Contig6_All	GO:0015031	biological_process	protein transport	7.39702e-99
csn-miR477g-p5_2ss1CT22CT	CL3059.Contig22_All	GO:0006559	biological_process	L-phenylalanine catabolic process	3.82875e-89
csn-miR477g-p5_2ss1CT22CT	CL3059.Contig22_All	GO:0006952	biological_process	defense response	3.82875e-89
csn-miR477g-p5_2ss1CT22CT	CL3059.Contig22_All	GO:0006979	biological_process	response to oxidative stress	3.82875e-89
csn-miR477g-p5_2ss1CT22CT	CL3059.Contig22_All	GO:0009611	biological_process	response to wounding	3.82875e-89
csn-miR477g-p5_2ss1CT22CT	CL3059.Contig22_All	GO:0009699	biological_process	phenylpropanoid biosynthetic process	3.82875e-89
csn-miR477g-p5_2ss1CT22CT	CL3059.Contig22_All	GO:0009800	biological_process	cinnamic acid biosynthetic process	3.82875e-89
csn-miR477g-p5_2ss1CT22CT	CL3059.Contig22_All	GO:0080167	biological_process	response to karrikin	3.82875e-89
PC-3p-48624_39	Unigene17777_All	GO:0006897	biological_process	endocytosis	4.19821e-95
PC-3p-48624_39	Unigene17777_All	GO:0008150	biological_process	biological_process	4.19821e-95
PC-3p-48624_39	Unigene17777_All	GO:0008360	biological_process	regulation of cell shape	4.19821e-95
PC-3p-48624_39	Unigene17777_All	GO:0016055	biological_process	Wnt signaling pathway	4.19821e-95
PC-3p-48624_39	Unigene17777_All	GO:0018105	biological_process	peptidyl-serine phosphorylation	4.19821e-95
csn-miR6173-p5_3	CL5735.Contig2_All	GO:0006629	biological_process	lipid metabolic process	4.19821e-95
csn-miR6173-p5_3	CL5735.Contig2_All	GO:0007165	biological_process	signal transduction	4.19821e-95
csn-miR6173-p5_3	CL5735.Contig2_All	GO:0016042	biological_process	lipid catabolic process	4.19821e-95
csn-miR6173-p5_3	CL5735.Contig2_All	GO:0035556	biological_process	intracellular signal transduction	4.19821e-95
csn-miR156f	Unigene375_All	GO:0006351	biological_process	transcription, DNA-templated	4.96795e-227
csn-miR156f	Unigene375_All	GO:0006355	biological_process	regulation of transcription, DNA-templated	4.96795e-227
csn-miR156f	Unigene375_All	GO:0048653	biological_process	anther development	4.96795e-227
csn-miR858b_R-3	CL1277.Contig4_All	GO:0006351	biological_process	transcription, DNA-templated	9.40999e-94
csn-miR858b_R-3	CL1277.Contig4_All	GO:0006355	biological_process	regulation of transcription, DNA-templated	9.40999e-94
csn-miR858b_R-3	CL1277.Contig4_All	GO:0009845	biological_process	seed germination	9.40999e-94
csn-miR858b_R-3	CL1277.Contig4_All	GO:0010026	biological_process	trichome differentiation	9.40999e-94
csn-miR858b_R-3	CL1277.Contig4_All	GO:0010090	biological_process	trichome morphogenesis	9.40999e-94
csn-miR858b_R-3	CL1277.Contig4_All	GO:0010214	biological_process	seed coat development	9.40999e-94
csn-miR858b_R-3	CL1277.Contig4_All	GO:0010468	biological_process	regulation of gene expression	9.40999e-94
csn-miR858b_R-3	CL1277.Contig4_All	GO:0048354	biological_process	mucilage biosynthetic process involved in seed coat development	9.40999e-94
csn-miR160b	CL3788.Contig1_All	GO:0006351	biological_process	transcription, DNA-templated	6.15633e-111
csn-miR160b	CL3788.Contig1_All	GO:0006355	biological_process	regulation of transcription, DNA-templated	6.15633e-111
csn-miR160b	CL3788.Contig1_All	GO:0007389	biological_process	pattern specification process	6.15633e-111
csn-miR160b	CL3788.Contig1_All	GO:0009734	biological_process	auxin-activated signaling pathway	6.15633e-111
csn-miR160b	CL3788.Contig1_All	GO:0009738	biological_process	abscisic acid-activated signaling pathway	6.15633e-111
csn-miR160b	CL3788.Contig1_All	GO:0009743	biological_process	response to carbohydrate	6.15633e-111
csn-miR160b	CL3788.Contig1_All	GO:0010154	biological_process	fruit development	6.15633e-111
csn-miR160b	CL3788.Contig1_All	GO:0031540	biological_process	regulation of anthocyanin biosynthetic process	6.15633e-111
csn-miR160b	CL3788.Contig1_All	GO:0048366	biological_process	leaf development	6.15633e-111
csn-miR160b	CL3788.Contig1_All	GO:0048441	biological_process	petal development	6.15633e-111
csn-miR160b	CL3788.Contig1_All	GO:0048442	biological_process	sepal development	6.15633e-111
csn-miR160b	CL3788.Contig1_All	GO:0048589	biological_process	developmental growth	6.15633e-111
csn-miR160b	CL3788.Contig1_All	GO:0048829	biological_process	root cap development	6.15633e-111
csn-miR160b	CL3788.Contig1_All	GO:0051301	biological_process	cell division	6.15633e-111
csn-miR828a	CL10500.Contig2_All	GO:0006351	biological_process	transcription, DNA-templated	0
csn-miR828a	CL10500.Contig2_All	GO:0006355	biological_process	regulation of transcription, DNA-templated	0
csn-miR828a	CL10500.Contig2_All	GO:0045165	biological_process	cell fate commitment	0
csn-miR828a	CL10500.Contig2_All	GO:0045893	biological_process	positive regulation of transcription, DNA-templated	0
csn-miR828a	CL10500.Contig2_All	GO:0048765	biological_process	root hair cell differentiation	0
csn-miR159a-p3_2ss9AT18TG	CL9670.Contig2_All	GO:0010501	biological_process	RNA secondary structure unwinding	7.14416e-114
csn-miR394b_1ss6AG	CL4539.Contig2_All	GO:0010305	biological_process	leaf vascular tissue pattern formation	1.0711e-100
csn-miR394b_1ss6AG	CL4539.Contig2_All	GO:0010928	biological_process	regulation of auxin mediated signaling pathway	1.0711e-100
csn-miR394b_1ss6AG	CL4539.Contig2_All	GO:0031146	biological_process	SCF-dependent proteasomal ubiquitin-dependent protein catabolic process	1.0711e-100
csn-miR394b_1ss6AG	CL4539.Contig2_All	GO:0060776	biological_process	simple leaf morphogenesis	1.0711e-100
csn-miR482b-p5_2ss9TA19AC	Unigene9839_All	GO:0051762	biological_process	sesquiterpene biosynthetic process	7.14416e-114
csn-miR165a-p5_2ss15AT19CT	CL6740.Contig3_All	GO:0006351	biological_process	transcription, DNA-templated	4.79191e-125
csn-miR165a-p5_2ss15AT19CT	CL6740.Contig3_All	GO:0006355	biological_process	regulation of transcription, DNA-templated	4.79191e-125
csn-miR165a-p5_2ss15AT19CT	CL6740.Contig3_All	GO:0009855	biological_process	determination of bilateral symmetry	4.79191e-125
csn-miR165a-p5_2ss15AT19CT	CL6740.Contig3_All	GO:0009944	biological_process	polarity specification of adaxial/abaxial axis	4.79191e-125
csn-miR165a-p5_2ss15AT19CT	CL6740.Contig3_All	GO:0009956	biological_process	radial pattern formation	4.79191e-125
csn-miR165a-p5_2ss15AT19CT	CL6740.Contig3_All	GO:0010014	biological_process	meristem initiation	4.79191e-125
csn-miR165a-p5_2ss15AT19CT	CL6740.Contig3_All	GO:0010051	biological_process	xylem and phloem pattern formation	4.79191e-125
csn-miR165a-p5_2ss15AT19CT	CL6740.Contig3_All	GO:0010089	biological_process	xylem development	4.79191e-125
csn-miR165a-p5_2ss15AT19CT	CL6740.Contig3_All	GO:0030154	biological_process	cell differentiation	4.79191e-125
csn-miR393a_R+1_1ss21CT	CL3747.Contig4_All	GO:0009734	biological_process	auxin-activated signaling pathway	0
csn-miR858b_R-3	Unigene1958_All	GO:0006351	biological_process	transcription, DNA-templated	0
csn-miR858b_R-3	Unigene1958_All	GO:0006355	biological_process	regulation of transcription, DNA-templated	0
csn-miR858b_R-3	Unigene1958_All	GO:0009611	biological_process	response to wounding	0
csn-miR858b_R-3	Unigene1958_All	GO:0009651	biological_process	response to salt stress	0
csn-miR858b_R-3	Unigene1958_All	GO:0009737	biological_process	response to abscisic acid	0
csn-miR858b_R-3	Unigene1958_All	GO:0009751	biological_process	response to salicylic acid	0
csn-miR858b_R-3	Unigene1958_All	GO:0009800	biological_process	cinnamic acid biosynthetic process	0
csn-miR858b_R-3	Unigene1958_All	GO:0009892	biological_process	negative regulation of metabolic process	0
PC-3p-106557_16	Unigene35963_All	GO:0006260	biological_process	DNA replication	3.39003e-101
PC-3p-106557_16	Unigene35963_All	GO:0006974	biological_process	cellular response to DNA damage stimulus	3.39003e-101
PC-5p-38741_49	CL7574.Contig2_All	GO:0016485	biological_process	protein processing	2.06423e-151
PC-3p-201450_7	Unigene17777_All	GO:0006897	biological_process	endocytosis	4.19821e-95
PC-3p-201450_7	Unigene17777_All	GO:0008150	biological_process	biological_process	4.19821e-95
PC-3p-201450_7	Unigene17777_All	GO:0008360	biological_process	regulation of cell shape	4.19821e-95
PC-3p-201450_7	Unigene17777_All	GO:0016055	biological_process	Wnt signaling pathway	4.19821e-95
PC-3p-201450_7	Unigene17777_All	GO:0018105	biological_process	peptidyl-serine phosphorylation	4.19821e-95
PC-3p-131003_12	CL5900.Contig1_All	GO:0009611	biological_process	response to wounding	7.14416e-114
PC-3p-131003_12	CL5900.Contig1_All	GO:0009737	biological_process	response to abscisic acid	7.14416e-114
PC-3p-131003_12	CL5900.Contig1_All	GO:0046686	biological_process	response to cadmium ion	7.14416e-114
csn-miR396b-p5_2ss18AT19CT	CL2998.Contig2_All	GO:0006468	biological_process	protein phosphorylation	0
csn-miR396b-p5_2ss18AT19CT	CL2998.Contig2_All	GO:0007169	biological_process	transmembrane receptor protein tyrosine kinase signaling pathway	0
csn-miR396b-p5_2ss18AT19CT	CL2998.Contig2_All	GO:0009408	biological_process	response to heat	0
csn-miR396b-p5_2ss18AT19CT	CL2998.Contig2_All	GO:0009409	biological_process	response to cold	0
csn-miR396b-p5_2ss18AT19CT	CL2998.Contig2_All	GO:0046677	biological_process	response to antibiotic	0
csn-miR393a_1ss4AC	CL3747.Contig4_All	GO:0009734	biological_process	auxin-activated signaling pathway	0
csn-miR164c-5p_1ss1TG	CL2400.Contig2_All	GO:0006351	biological_process	transcription, DNA-templated	0
csn-miR164c-5p_1ss1TG	CL2400.Contig2_All	GO:0006355	biological_process	regulation of transcription, DNA-templated	0
csn-miR164c-5p_1ss1TG	CL2400.Contig2_All	GO:0007275	biological_process	multicellular organism development	0
csn-miR164c-5p_1ss1TG	CL2400.Contig2_All	GO:0009734	biological_process	auxin-activated signaling pathway	0
csn-miR164c-5p_1ss1TG	CL2400.Contig2_All	GO:0010072	biological_process	primary shoot apical meristem specification	0
csn-miR164c-5p_1ss1TG	CL2400.Contig2_All	GO:0048527	biological_process	lateral root development	0
csn-miR172c	CL42.Contig1_All	GO:0006351	biological_process	transcription, DNA-templated	1.27087e-272
csn-miR172c	CL42.Contig1_All	GO:0006355	biological_process	regulation of transcription, DNA-templated	1.27087e-272
csn-miR172c	CL42.Contig1_All	GO:0008150	biological_process	biological_process	1.27087e-272
csn-miR172c	CL42.Contig1_All	GO:0009908	biological_process	flower development	1.27087e-272
csn-miR172c	CL42.Contig1_All	GO:0010073	biological_process	meristem maintenance	1.27087e-272
csn-miR172c	CL42.Contig1_All	GO:0010093	biological_process	specification of floral organ identity	1.27087e-272
csn-miR172c	CL42.Contig1_All	GO:0019953	biological_process	sexual reproduction	1.27087e-272
csn-miR172c	CL42.Contig1_All	GO:0030154	biological_process	cell differentiation	1.27087e-272
csn-miR172c	CL42.Contig1_All	GO:0048316	biological_process	seed development	1.27087e-272
csn-miR172c	CL42.Contig1_All	GO:0048481	biological_process	plant ovule development	1.27087e-272
csn-miR160a	Unigene26726_All	GO:0006351	biological_process	transcription, DNA-templated	6.15633e-111
csn-miR160a	Unigene26726_All	GO:0006355	biological_process	regulation of transcription, DNA-templated	6.15633e-111
csn-miR160a	Unigene26726_All	GO:0007389	biological_process	pattern specification process	6.15633e-111
csn-miR160a	Unigene26726_All	GO:0009734	biological_process	auxin-activated signaling pathway	6.15633e-111
csn-miR160a	Unigene26726_All	GO:0009738	biological_process	abscisic acid-activated signaling pathway	6.15633e-111
csn-miR160a	Unigene26726_All	GO:0009743	biological_process	response to carbohydrate	6.15633e-111
csn-miR160a	Unigene26726_All	GO:0010154	biological_process	fruit development	6.15633e-111
csn-miR160a	Unigene26726_All	GO:0031540	biological_process	regulation of anthocyanin biosynthetic process	6.15633e-111
csn-miR160a	Unigene26726_All	GO:0048366	biological_process	leaf development	6.15633e-111
csn-miR160a	Unigene26726_All	GO:0048441	biological_process	petal development	6.15633e-111
csn-miR160a	Unigene26726_All	GO:0048442	biological_process	sepal development	6.15633e-111
csn-miR160a	Unigene26726_All	GO:0048589	biological_process	developmental growth	6.15633e-111
csn-miR160a	Unigene26726_All	GO:0048829	biological_process	root cap development	6.15633e-111
csn-miR160a	Unigene26726_All	GO:0051301	biological_process	cell division	6.15633e-111
csn-miR408-p5_2ss19GT20CT	CL7522.Contig2_All	GO:0006351	biological_process	transcription, DNA-templated	4.96795e-227
csn-miR408-p5_2ss19GT20CT	CL7522.Contig2_All	GO:0006355	biological_process	regulation of transcription, DNA-templated	4.96795e-227
csn-miR408-p5_2ss19GT20CT	CL7522.Contig2_All	GO:0008219	biological_process	cell death	4.96795e-227
csn-miR408-p5_2ss19GT20CT	CL7522.Contig2_All	GO:0009723	biological_process	response to ethylene	4.96795e-227
csn-miR408-p5_2ss19GT20CT	CL7522.Contig2_All	GO:0009735	biological_process	response to cytokinin	4.96795e-227
csn-miR408-p5_2ss19GT20CT	CL7522.Contig2_All	GO:0009753	biological_process	response to jasmonic acid	4.96795e-227
csn-miR408-p5_2ss19GT20CT	CL7522.Contig2_All	GO:0009873	biological_process	ethylene-activated signaling pathway	4.96795e-227
csn-miR408-p5_2ss19GT20CT	CL7522.Contig2_All	GO:0010286	biological_process	heat acclimation	4.96795e-227
csn-miR408-p5_2ss19GT20CT	CL7522.Contig2_All	GO:0045893	biological_process	positive regulation of transcription, DNA-templated	4.96795e-227
csn-miR408-p5_2ss19GT20CT	CL7522.Contig2_All	GO:0051707	biological_process	response to other organism	4.96795e-227
csn-miR8757b-p5_1ss17GC	CL5005.Contig3_All	GO:0009664	biological_process	plant-type cell wall organization	7.14416e-114
csn-miR393a	CL680.Contig2_CKL	GO:0009734	biological_process	auxin-activated signaling pathway	9.95283e-134
csn-miR5368-p3_2ss14TC17CT	CL2469.Contig1_All	GO:0051603	biological_process	proteolysis involved in cellular protein catabolic process	7.14416e-114
csn-miR169c-p3_2ss10CA21TC	Unigene568_All	GO:0009813	biological_process	flavonoid biosynthetic process	0
csn-miR169c-p3_2ss10CA21TC	Unigene568_All	GO:0052696	biological_process	flavonoid glucuronidation	0
csn-miR399e	Unigene20241_All	GO:0009252	biological_process	peptidoglycan biosynthetic process	0
csn-miR169e_R-3	CL531.Contig3_All	GO:0006351	biological_process	transcription, DNA-templated	5.37047e-136
csn-miR169e_R-3	CL531.Contig3_All	GO:0006355	biological_process	regulation of transcription, DNA-templated	5.37047e-136
csn-miR482a-3p_2ss18TC21TA	CL4692.Contig5_All	GO:0006952	biological_process	defense response	5.26784e-89
csn-miR482a-3p_2ss18TC21TA	CL4692.Contig5_All	GO:0009626	biological_process	plant-type hypersensitive response	5.26784e-89
csn-miR482a-3p_2ss18TC21TA	CL4692.Contig5_All	GO:0009814	biological_process	defense response, incompatible interaction	5.26784e-89
csn-miR858a_L-1R+1	CL2876.Contig1_CKL	GO:0006351	biological_process	transcription, DNA-templated	0
csn-miR858a_L-1R+1	CL2876.Contig1_CKL	GO:0006355	biological_process	regulation of transcription, DNA-templated	0
csn-miR858a_L-1R+1	CL2876.Contig1_CKL	GO:0006633	biological_process	fatty acid biosynthetic process	0
csn-miR858a_L-1R+1	CL2876.Contig1_CKL	GO:0006970	biological_process	response to osmotic stress	0
csn-miR858a_L-1R+1	CL2876.Contig1_CKL	GO:0009813	biological_process	flavonoid biosynthetic process	0
csn-miR858a_L-1R+1	CL2876.Contig1_CKL	GO:0010023	biological_process	proanthocyanidin biosynthetic process	0
PC-5p-509535_3	CL408.Contig1_All	GO:0008150	biological_process	biological_process	1.73087e-126
PC-5p-509535_3	CL408.Contig1_All	GO:0034314	biological_process	Arp2/3 complex-mediated actin nucleation	1.73087e-126
csn-miR393a_1ss4AC	CL680.Contig2_CKL	GO:0009734	biological_process	auxin-activated signaling pathway	9.95283e-134
PC-3p-219720_6	Unigene17777_All	GO:0006897	biological_process	endocytosis	4.19821e-95
PC-3p-219720_6	Unigene17777_All	GO:0008150	biological_process	biological_process	4.19821e-95
PC-3p-219720_6	Unigene17777_All	GO:0008360	biological_process	regulation of cell shape	4.19821e-95
PC-3p-219720_6	Unigene17777_All	GO:0016055	biological_process	Wnt signaling pathway	4.19821e-95
PC-3p-219720_6	Unigene17777_All	GO:0018105	biological_process	peptidyl-serine phosphorylation	4.19821e-95
csn-miR169e	CL531.Contig3_All	GO:0006351	biological_process	transcription, DNA-templated	5.37047e-136
csn-miR169e	CL531.Contig3_All	GO:0006355	biological_process	regulation of transcription, DNA-templated	5.37047e-136
csn-miR166a_R+2_3	CL6740.Contig3_All	GO:0006351	biological_process	transcription, DNA-templated	4.79191e-125
csn-miR166a_R+2_3	CL6740.Contig3_All	GO:0006355	biological_process	regulation of transcription, DNA-templated	4.79191e-125
csn-miR166a_R+2_3	CL6740.Contig3_All	GO:0009855	biological_process	determination of bilateral symmetry	4.79191e-125
csn-miR166a_R+2_3	CL6740.Contig3_All	GO:0009944	biological_process	polarity specification of adaxial/abaxial axis	4.79191e-125
csn-miR166a_R+2_3	CL6740.Contig3_All	GO:0009956	biological_process	radial pattern formation	4.79191e-125
csn-miR166a_R+2_3	CL6740.Contig3_All	GO:0010014	biological_process	meristem initiation	4.79191e-125
csn-miR166a_R+2_3	CL6740.Contig3_All	GO:0010051	biological_process	xylem and phloem pattern formation	4.79191e-125
csn-miR166a_R+2_3	CL6740.Contig3_All	GO:0010089	biological_process	xylem development	4.79191e-125
csn-miR166a_R+2_3	CL6740.Contig3_All	GO:0030154	biological_process	cell differentiation	4.79191e-125
PC-3p-40622_47	Unigene17777_All	GO:0006897	biological_process	endocytosis	4.19821e-95
PC-3p-40622_47	Unigene17777_All	GO:0008150	biological_process	biological_process	4.19821e-95
PC-3p-40622_47	Unigene17777_All	GO:0008360	biological_process	regulation of cell shape	4.19821e-95
PC-3p-40622_47	Unigene17777_All	GO:0016055	biological_process	Wnt signaling pathway	4.19821e-95
PC-3p-40622_47	Unigene17777_All	GO:0018105	biological_process	peptidyl-serine phosphorylation	4.19821e-95
csn-miR159c_R-1	Unigene46763_All	GO:0007015	biological_process	actin filament organization	4.0546e-135
csn-miR159c_R-1	Unigene46763_All	GO:0009903	biological_process	chloroplast avoidance movement	4.0546e-135
csn-miR159c_R-1	Unigene46763_All	GO:0009904	biological_process	chloroplast accumulation movement	4.0546e-135
csn-miR159c_R-1	Unigene46763_All	GO:0071483	biological_process	cellular response to blue light	4.0546e-135
csn-miR477g-p5_1ss1CT	CL3059.Contig16_All	GO:0006559	biological_process	L-phenylalanine catabolic process	3.82875e-89
csn-miR477g-p5_1ss1CT	CL3059.Contig16_All	GO:0006952	biological_process	defense response	3.82875e-89
csn-miR477g-p5_1ss1CT	CL3059.Contig16_All	GO:0006979	biological_process	response to oxidative stress	3.82875e-89
csn-miR477g-p5_1ss1CT	CL3059.Contig16_All	GO:0009611	biological_process	response to wounding	3.82875e-89
csn-miR477g-p5_1ss1CT	CL3059.Contig16_All	GO:0009699	biological_process	phenylpropanoid biosynthetic process	3.82875e-89
csn-miR477g-p5_1ss1CT	CL3059.Contig16_All	GO:0009800	biological_process	cinnamic acid biosynthetic process	3.82875e-89
csn-miR477g-p5_1ss1CT	CL3059.Contig16_All	GO:0080167	biological_process	response to karrikin	3.82875e-89
csn-miR319a	Unigene16900_All	GO:0006468	biological_process	protein phosphorylation	0
csn-miR319a	Unigene16900_All	GO:0007169	biological_process	transmembrane receptor protein tyrosine kinase signaling pathway	0
csn-miR477g-p5_2ss1CT22CT	CL3059.Contig4_All	GO:0006559	biological_process	L-phenylalanine catabolic process	3.82875e-89
csn-miR477g-p5_2ss1CT22CT	CL3059.Contig4_All	GO:0006952	biological_process	defense response	3.82875e-89
csn-miR477g-p5_2ss1CT22CT	CL3059.Contig4_All	GO:0006979	biological_process	response to oxidative stress	3.82875e-89
csn-miR477g-p5_2ss1CT22CT	CL3059.Contig4_All	GO:0009611	biological_process	response to wounding	3.82875e-89
csn-miR477g-p5_2ss1CT22CT	CL3059.Contig4_All	GO:0009699	biological_process	phenylpropanoid biosynthetic process	3.82875e-89
csn-miR477g-p5_2ss1CT22CT	CL3059.Contig4_All	GO:0009800	biological_process	cinnamic acid biosynthetic process	3.82875e-89
csn-miR477g-p5_2ss1CT22CT	CL3059.Contig4_All	GO:0080167	biological_process	response to karrikin	3.82875e-89
csn-miR396b-p5_2ss18AT19CT	Unigene32482_CKL	GO:0006396	biological_process	RNA processing	2.06423e-151
csn-miR396b-p5_2ss18AT19CT	Unigene32482_CKL	GO:0006397	biological_process	mRNA processing	2.06423e-151
csn-miR396b-p5_2ss18AT19CT	Unigene32482_CKL	GO:0009451	biological_process	RNA modification	2.06423e-151
csn-miR396b-p5_2ss18AT19CT	Unigene32482_CKL	GO:0009631	biological_process	cold acclimation	2.06423e-151
csn-miR396b-p5_2ss18AT19CT	Unigene32482_CKL	GO:0016553	biological_process	base conversion or substitution editing	2.06423e-151
csn-miR396b-p5_2ss18AT19CT	Unigene32482_CKL	GO:0043489	biological_process	RNA stabilization	2.06423e-151
csn-miR396b-p5_2ss18AT19CT	Unigene32482_CKL	GO:0045087	biological_process	innate immune response	2.06423e-151
csn-miR169e_R-2_1ss13AG	CL531.Contig2_All	GO:0006351	biological_process	transcription, DNA-templated	5.37047e-136
csn-miR169e_R-2_1ss13AG	CL531.Contig2_All	GO:0006355	biological_process	regulation of transcription, DNA-templated	5.37047e-136
csn-miR396a_R-3_1ss4AC	CL2270.Contig1_All	GO:0000578	biological_process	embryonic axis specification	1.08345e-150
csn-miR396a_R-3_1ss4AC	CL2270.Contig1_All	GO:0007034	biological_process	vacuolar transport	1.08345e-150
csn-miR396a_R-3_1ss4AC	CL2270.Contig1_All	GO:0009793	biological_process	embryo development ending in seed dormancy	1.08345e-150
csn-miR396a_R-3_1ss4AC	CL2270.Contig1_All	GO:0015031	biological_process	protein transport	1.08345e-150
csn-miR396a_R-3_1ss4AC	CL2270.Contig1_All	GO:0016192	biological_process	vesicle-mediated transport	1.08345e-150
csn-miR396a_R-3_1ss4AC	CL2270.Contig1_All	GO:0032509	biological_process	endosome transport via multivesicular body sorting pathway	1.08345e-150
csn-miR396a_R-3_1ss4AC	CL2270.Contig1_All	GO:0040007	biological_process	growth	1.08345e-150
PC-3p-72672_25	Unigene17777_All	GO:0006897	biological_process	endocytosis	4.19821e-95
PC-3p-72672_25	Unigene17777_All	GO:0008150	biological_process	biological_process	4.19821e-95
PC-3p-72672_25	Unigene17777_All	GO:0008360	biological_process	regulation of cell shape	4.19821e-95
PC-3p-72672_25	Unigene17777_All	GO:0016055	biological_process	Wnt signaling pathway	4.19821e-95
PC-3p-72672_25	Unigene17777_All	GO:0018105	biological_process	peptidyl-serine phosphorylation	4.19821e-95
PC-3p-165626_9	Unigene11024_All	GO:0006790	biological_process	sulfur compound metabolic process	3.86186e-286
PC-3p-165626_9	Unigene11024_All	GO:0009150	biological_process	purine ribonucleotide metabolic process	3.86186e-286
PC-3p-52926_35	Unigene17777_All	GO:0006897	biological_process	endocytosis	4.19821e-95
PC-3p-52926_35	Unigene17777_All	GO:0008150	biological_process	biological_process	4.19821e-95
PC-3p-52926_35	Unigene17777_All	GO:0008360	biological_process	regulation of cell shape	4.19821e-95
PC-3p-52926_35	Unigene17777_All	GO:0016055	biological_process	Wnt signaling pathway	4.19821e-95
PC-3p-52926_35	Unigene17777_All	GO:0018105	biological_process	peptidyl-serine phosphorylation	4.19821e-95
csn-miR166d-p5_2ss10CG20AC	CL9863.Contig2_All	GO:0008150	biological_process	biological_process	2.06423e-151
csn-miR395a	CL12050.Contig1_All	GO:0000103	biological_process	sulfate assimilation	0
csn-miR393a	CL3747.Contig4_All	GO:0009734	biological_process	auxin-activated signaling pathway	0
csn-miR166a_R+2_1	Unigene33923_All	GO:0006351	biological_process	transcription, DNA-templated	1.35153e-116
csn-miR166a_R+2_1	Unigene33923_All	GO:0006355	biological_process	regulation of transcription, DNA-templated	1.35153e-116
csn-miR166a_R+2_1	Unigene33923_All	GO:0008284	biological_process	positive regulation of cell proliferation	1.35153e-116
csn-miR166a_R+2_1	Unigene33923_All	GO:0009733	biological_process	response to auxin	1.35153e-116
csn-miR166a_R+2_1	Unigene33923_All	GO:0010014	biological_process	meristem initiation	1.35153e-116
csn-miR166a_R+2_1	Unigene33923_All	GO:0010067	biological_process	procambium histogenesis	1.35153e-116
csn-miR166a_R+2_1	Unigene33923_All	GO:0010072	biological_process	primary shoot apical meristem specification	1.35153e-116
csn-miR166a_R+2_1	Unigene33923_All	GO:0010089	biological_process	xylem development	1.35153e-116
csn-miR166a_R+2_1	Unigene33923_All	GO:0030154	biological_process	cell differentiation	1.35153e-116
csn-miR166a_R+2_1	Unigene33923_All	GO:0045597	biological_process	positive regulation of cell differentiation	1.35153e-116
csn-miR482d-p3_2ss13CT17CT	CL6794.Contig4_All	GO:0006397	biological_process	mRNA processing	0
csn-miR482d-p3_2ss13CT17CT	CL6794.Contig4_All	GO:0009409	biological_process	response to cold	0
csn-miR482d-p3_2ss13CT17CT	CL6794.Contig4_All	GO:0009737	biological_process	response to abscisic acid	0
csn-miR482d-p3_2ss13CT17CT	CL6794.Contig4_All	GO:0045087	biological_process	innate immune response	0
csn-miR169f_R-1_2ss20TC21GT	CL531.Contig3_All	GO:0006351	biological_process	transcription, DNA-templated	5.37047e-136
csn-miR169f_R-1_2ss20TC21GT	CL531.Contig3_All	GO:0006355	biological_process	regulation of transcription, DNA-templated	5.37047e-136
csn-miR396b-p5_2ss18AT19CT	Unigene8003_All	GO:0006351	biological_process	transcription, DNA-templated	0
csn-miR396b-p5_2ss18AT19CT	Unigene8003_All	GO:0006355	biological_process	regulation of transcription, DNA-templated	0
csn-miR396b-p5_2ss18AT19CT	Unigene8003_All	GO:0009624	biological_process	response to nematode	0
csn-miR396b-p5_2ss18AT19CT	Unigene8003_All	GO:0048364	biological_process	root development	0
csn-miR396b-p5_2ss18AT19CT	Unigene8003_All	GO:0048366	biological_process	leaf development	0
csn-miR396b-p5_2ss18AT19CT	Unigene8003_All	GO:0061062	biological_process	regulation of nematode larval development	0
csn-miR398_2ss9CT21GC	Unigene26199_All	GO:0006428	biological_process	isoleucyl-tRNA aminoacylation	7.14416e-114
csn-miR169q_R-2	CL531.Contig3_All	GO:0006351	biological_process	transcription, DNA-templated	5.37047e-136
csn-miR169q_R-2	CL531.Contig3_All	GO:0006355	biological_process	regulation of transcription, DNA-templated	5.37047e-136
csn-miR166a-3p	CL6740.Contig3_All	GO:0006351	biological_process	transcription, DNA-templated	4.79191e-125
csn-miR166a-3p	CL6740.Contig3_All	GO:0006355	biological_process	regulation of transcription, DNA-templated	4.79191e-125
csn-miR166a-3p	CL6740.Contig3_All	GO:0009855	biological_process	determination of bilateral symmetry	4.79191e-125
csn-miR166a-3p	CL6740.Contig3_All	GO:0009944	biological_process	polarity specification of adaxial/abaxial axis	4.79191e-125
csn-miR166a-3p	CL6740.Contig3_All	GO:0009956	biological_process	radial pattern formation	4.79191e-125
csn-miR166a-3p	CL6740.Contig3_All	GO:0010014	biological_process	meristem initiation	4.79191e-125
csn-miR166a-3p	CL6740.Contig3_All	GO:0010051	biological_process	xylem and phloem pattern formation	4.79191e-125
csn-miR166a-3p	CL6740.Contig3_All	GO:0010089	biological_process	xylem development	4.79191e-125
csn-miR166a-3p	CL6740.Contig3_All	GO:0030154	biological_process	cell differentiation	4.79191e-125
csn-miR166a_R+2_1ss1TG	CL6740.Contig4_All	GO:0006351	biological_process	transcription, DNA-templated	4.79191e-125
csn-miR166a_R+2_1ss1TG	CL6740.Contig4_All	GO:0006355	biological_process	regulation of transcription, DNA-templated	4.79191e-125
csn-miR166a_R+2_1ss1TG	CL6740.Contig4_All	GO:0009855	biological_process	determination of bilateral symmetry	4.79191e-125
csn-miR166a_R+2_1ss1TG	CL6740.Contig4_All	GO:0009944	biological_process	polarity specification of adaxial/abaxial axis	4.79191e-125
csn-miR166a_R+2_1ss1TG	CL6740.Contig4_All	GO:0009956	biological_process	radial pattern formation	4.79191e-125
csn-miR166a_R+2_1ss1TG	CL6740.Contig4_All	GO:0010014	biological_process	meristem initiation	4.79191e-125
csn-miR166a_R+2_1ss1TG	CL6740.Contig4_All	GO:0010051	biological_process	xylem and phloem pattern formation	4.79191e-125
csn-miR166a_R+2_1ss1TG	CL6740.Contig4_All	GO:0010089	biological_process	xylem development	4.79191e-125
csn-miR166a_R+2_1ss1TG	CL6740.Contig4_All	GO:0030154	biological_process	cell differentiation	4.79191e-125
csn-miR396b-p5_2ss18AT19CT	CL2731.Contig2_All	GO:0010267	biological_process	production of ta-siRNAs involved in RNA interference	7.14416e-114
csn-miR396b-p5_2ss18AT19CT	CL2731.Contig2_All	GO:0016032	biological_process	viral process	7.14416e-114
csn-miR396b-p5_2ss18AT19CT	CL2731.Contig2_All	GO:0035196	biological_process	production of miRNAs involved in gene silencing by miRNA	7.14416e-114
csn-miR396b-p5_2ss18AT19CT	CL2731.Contig2_All	GO:0060145	biological_process	viral gene silencing in virus induced gene silencing	7.14416e-114
csn-miR396b-p5_2ss18AT19CT	CL2731.Contig2_All	GO:0070919	biological_process	production of siRNA involved in chromatin silencing by small RNA	7.14416e-114
csn-miR394b_1ss18TG	CL4539.Contig1_All	GO:0010305	biological_process	leaf vascular tissue pattern formation	1.0711e-100
csn-miR394b_1ss18TG	CL4539.Contig1_All	GO:0010928	biological_process	regulation of auxin mediated signaling pathway	1.0711e-100
csn-miR394b_1ss18TG	CL4539.Contig1_All	GO:0031146	biological_process	SCF-dependent proteasomal ubiquitin-dependent protein catabolic process	1.0711e-100
csn-miR394b_1ss18TG	CL4539.Contig1_All	GO:0060776	biological_process	simple leaf morphogenesis	1.0711e-100
csn-miR393a_R+1_1ss21CT	CL3747.Contig3_All	GO:0006468	biological_process	protein phosphorylation	9.95283e-134
csn-miR393a_R+1_1ss21CT	CL3747.Contig3_All	GO:0007169	biological_process	transmembrane receptor protein tyrosine kinase signaling pathway	9.95283e-134
csn-miR393a_R+1_1ss21CT	CL3747.Contig3_All	GO:0009734	biological_process	auxin-activated signaling pathway	9.95283e-134
csn-miR393a_R+1_1ss21CT	CL3747.Contig3_All	GO:0009742	biological_process	brassinosteroid mediated signaling pathway	9.95283e-134
csn-miR393a_R+1_1ss21CT	CL3747.Contig3_All	GO:0010051	biological_process	xylem and phloem pattern formation	9.95283e-134
csn-miR393a_R+1_1ss21CT	CL3747.Contig3_All	GO:0010233	biological_process	phloem transport	9.95283e-134
csn-miR393a_R+1_1ss21CT	CL3747.Contig3_All	GO:0010305	biological_process	leaf vascular tissue pattern formation	9.95283e-134
csn-miR162_1ss20AG	CL11508.Contig2_All	GO:0030422	biological_process	production of siRNA involved in RNA interference	9.50821e-198
csn-miR395a	CL6037.Contig1_All	GO:0008202	biological_process	steroid metabolic process	1.34281e-204
csn-miR395a	CL6037.Contig1_All	GO:0009611	biological_process	response to wounding	1.34281e-204
csn-miR395a	CL6037.Contig1_All	GO:0010051	biological_process	xylem and phloem pattern formation	1.34281e-204
csn-miR395a	CL6037.Contig1_All	GO:0055114	biological_process	oxidation-reduction process	1.34281e-204
csn-miR162_R+1	CL11508.Contig2_All	GO:0030422	biological_process	production of siRNA involved in RNA interference	9.50821e-198
csn-miR166a_R+2_2	Unigene33923_All	GO:0006351	biological_process	transcription, DNA-templated	1.35153e-116
csn-miR166a_R+2_2	Unigene33923_All	GO:0006355	biological_process	regulation of transcription, DNA-templated	1.35153e-116
csn-miR166a_R+2_2	Unigene33923_All	GO:0008284	biological_process	positive regulation of cell proliferation	1.35153e-116
csn-miR166a_R+2_2	Unigene33923_All	GO:0009733	biological_process	response to auxin	1.35153e-116
csn-miR166a_R+2_2	Unigene33923_All	GO:0010014	biological_process	meristem initiation	1.35153e-116
csn-miR166a_R+2_2	Unigene33923_All	GO:0010067	biological_process	procambium histogenesis	1.35153e-116
csn-miR166a_R+2_2	Unigene33923_All	GO:0010072	biological_process	primary shoot apical meristem specification	1.35153e-116
csn-miR166a_R+2_2	Unigene33923_All	GO:0010089	biological_process	xylem development	1.35153e-116
csn-miR166a_R+2_2	Unigene33923_All	GO:0030154	biological_process	cell differentiation	1.35153e-116
csn-miR166a_R+2_2	Unigene33923_All	GO:0045597	biological_process	positive regulation of cell differentiation	1.35153e-116
PC-3p-66711_27	CL4863.Contig2_All	GO:0006468	biological_process	protein phosphorylation	7.14416e-114
csn-miR396b-p3_2ss18AT19CT	Unigene32482_CKL	GO:0006396	biological_process	RNA processing	2.06423e-151
csn-miR396b-p3_2ss18AT19CT	Unigene32482_CKL	GO:0006397	biological_process	mRNA processing	2.06423e-151
csn-miR396b-p3_2ss18AT19CT	Unigene32482_CKL	GO:0009451	biological_process	RNA modification	2.06423e-151
csn-miR396b-p3_2ss18AT19CT	Unigene32482_CKL	GO:0009631	biological_process	cold acclimation	2.06423e-151
csn-miR396b-p3_2ss18AT19CT	Unigene32482_CKL	GO:0016553	biological_process	base conversion or substitution editing	2.06423e-151
csn-miR396b-p3_2ss18AT19CT	Unigene32482_CKL	GO:0043489	biological_process	RNA stabilization	2.06423e-151
csn-miR396b-p3_2ss18AT19CT	Unigene32482_CKL	GO:0045087	biological_process	innate immune response	2.06423e-151
csn-miR319a	Unigene35518_EL	GO:0006351	biological_process	transcription, DNA-templated	0
csn-miR319a	Unigene35518_EL	GO:0006355	biological_process	regulation of transcription, DNA-templated	0
csn-miR319a	Unigene35518_EL	GO:0009793	biological_process	embryo development ending in seed dormancy	0
csn-miR319a	Unigene35518_EL	GO:0009965	biological_process	leaf morphogenesis	0
csn-miR319a	Unigene35518_EL	GO:0030154	biological_process	cell differentiation	0
csn-miR319a	Unigene35518_EL	GO:0045962	biological_process	positive regulation of development, heterochronic	0
csn-miR319a	Unigene35518_EL	GO:0048366	biological_process	leaf development	0
csn-miR159b-p5_2ss11CA18TG	CL8702.Contig1_All	GO:0010205	biological_process	photoinhibition	0
csn-miR159b-p5_2ss11CA18TG	CL8702.Contig1_All	GO:0010207	biological_process	photosystem II assembly	0
csn-miR159b-p5_2ss11CA18TG	CL8702.Contig1_All	GO:0019684	biological_process	photosynthesis, light reaction	0
csn-miR159b-p5_2ss11CA18TG	CL8702.Contig1_All	GO:0035304	biological_process	regulation of protein dephosphorylation	0
csn-miR159b-p5_2ss11CA18TG	CL8702.Contig1_All	GO:0042549	biological_process	photosystem II stabilization	0
csn-miR399a	Unigene20241_All	GO:0009252	biological_process	peptidoglycan biosynthetic process	0
csn-miR394b_L-1_1ss5CA	CL2469.Contig1_All	GO:0051603	biological_process	proteolysis involved in cellular protein catabolic process	1.02804e-251
csn-miR408-p3_2ss18GT19GT	CL2303.Contig2_All	GO:0006508	biological_process	proteolysis	8.63272e-111
csn-miR408-p3_2ss18GT19GT	CL2303.Contig2_All	GO:0009834	biological_process	plant-type secondary cell wall biogenesis	8.63272e-111
csn-miR408-p3_2ss18GT19GT	CL2303.Contig2_All	GO:0010215	biological_process	cellulose microfibril organization	8.63272e-111
csn-miR408-p3_2ss18GT19GT	CL2303.Contig2_All	GO:0016049	biological_process	cell growth	8.63272e-111
csn-miR394b_1ss18TG	CL4539.Contig2_All	GO:0010305	biological_process	leaf vascular tissue pattern formation	1.0711e-100
csn-miR394b_1ss18TG	CL4539.Contig2_All	GO:0010928	biological_process	regulation of auxin mediated signaling pathway	1.0711e-100
csn-miR394b_1ss18TG	CL4539.Contig2_All	GO:0031146	biological_process	SCF-dependent proteasomal ubiquitin-dependent protein catabolic process	1.0711e-100
csn-miR394b_1ss18TG	CL4539.Contig2_All	GO:0060776	biological_process	simple leaf morphogenesis	1.0711e-100
csn-miR159a-5p_L-1R-1	CL7522.Contig2_All	GO:0006351	biological_process	transcription, DNA-templated	2.06423e-151
csn-miR159a-5p_L-1R-1	CL7522.Contig2_All	GO:0006355	biological_process	regulation of transcription, DNA-templated	2.06423e-151
csn-miR159a-5p_L-1R-1	CL7522.Contig2_All	GO:0008219	biological_process	cell death	2.06423e-151
csn-miR159a-5p_L-1R-1	CL7522.Contig2_All	GO:0009723	biological_process	response to ethylene	2.06423e-151
csn-miR159a-5p_L-1R-1	CL7522.Contig2_All	GO:0009735	biological_process	response to cytokinin	2.06423e-151
csn-miR159a-5p_L-1R-1	CL7522.Contig2_All	GO:0009753	biological_process	response to jasmonic acid	2.06423e-151
csn-miR159a-5p_L-1R-1	CL7522.Contig2_All	GO:0009873	biological_process	ethylene-activated signaling pathway	2.06423e-151
csn-miR159a-5p_L-1R-1	CL7522.Contig2_All	GO:0010286	biological_process	heat acclimation	2.06423e-151
csn-miR159a-5p_L-1R-1	CL7522.Contig2_All	GO:0045893	biological_process	positive regulation of transcription, DNA-templated	2.06423e-151
csn-miR159a-5p_L-1R-1	CL7522.Contig2_All	GO:0051707	biological_process	response to other organism	2.06423e-151
PC-3p-42453_45	CL756.Contig1_All	GO:0008150	biological_process	biological_process	4.03445e-162
csn-miR169d-p3_1ss9CA	Unigene568_All	GO:0009813	biological_process	flavonoid biosynthetic process	0
csn-miR169d-p3_1ss9CA	Unigene568_All	GO:0052696	biological_process	flavonoid glucuronidation	0
csn-miR828a	CL7722.Contig1_All	GO:0006351	biological_process	transcription, DNA-templated	3.15511e-207
csn-miR828a	CL7722.Contig1_All	GO:0007275	biological_process	multicellular organism development	3.15511e-207
csn-miR828a	CL7722.Contig1_All	GO:0010026	biological_process	trichome differentiation	3.15511e-207
csn-miR828a	CL7722.Contig1_All	GO:0045893	biological_process	positive regulation of transcription, DNA-templated	3.15511e-207
PC-3p-32594_59	CL6760.Contig2_EL	GO:0006511	biological_process	ubiquitin-dependent protein catabolic process	6.60748e-129
PC-3p-32594_59	CL6760.Contig2_EL	GO:0051603	biological_process	proteolysis involved in cellular protein catabolic process	6.60748e-129
csn-miR160b	Unigene26726_All	GO:0006351	biological_process	transcription, DNA-templated	6.15633e-111
csn-miR160b	Unigene26726_All	GO:0006355	biological_process	regulation of transcription, DNA-templated	6.15633e-111
csn-miR160b	Unigene26726_All	GO:0007389	biological_process	pattern specification process	6.15633e-111
csn-miR160b	Unigene26726_All	GO:0009734	biological_process	auxin-activated signaling pathway	6.15633e-111
csn-miR160b	Unigene26726_All	GO:0009738	biological_process	abscisic acid-activated signaling pathway	6.15633e-111
csn-miR160b	Unigene26726_All	GO:0009743	biological_process	response to carbohydrate	6.15633e-111
csn-miR160b	Unigene26726_All	GO:0010154	biological_process	fruit development	6.15633e-111
csn-miR160b	Unigene26726_All	GO:0031540	biological_process	regulation of anthocyanin biosynthetic process	6.15633e-111
csn-miR160b	Unigene26726_All	GO:0048366	biological_process	leaf development	6.15633e-111
csn-miR160b	Unigene26726_All	GO:0048441	biological_process	petal development	6.15633e-111
csn-miR160b	Unigene26726_All	GO:0048442	biological_process	sepal development	6.15633e-111
csn-miR160b	Unigene26726_All	GO:0048589	biological_process	developmental growth	6.15633e-111
csn-miR160b	Unigene26726_All	GO:0048829	biological_process	root cap development	6.15633e-111
csn-miR160b	Unigene26726_All	GO:0051301	biological_process	cell division	6.15633e-111
PC-5p-108604_15	CL9144.Contig1_All	GO:0006351	biological_process	transcription, DNA-templated	4.96795e-227
PC-5p-108604_15	CL9144.Contig1_All	GO:0006355	biological_process	regulation of transcription, DNA-templated	4.96795e-227
PC-5p-108604_15	CL9144.Contig1_All	GO:0006820	biological_process	anion transport	4.96795e-227
PC-5p-108604_15	CL9144.Contig1_All	GO:0050982	biological_process	detection of mechanical stimulus	4.96795e-227
csn-miR165a-p5_2ss15AT19CT	CL6740.Contig2_All	GO:0006351	biological_process	transcription, DNA-templated	4.79191e-125
csn-miR165a-p5_2ss15AT19CT	CL6740.Contig2_All	GO:0006355	biological_process	regulation of transcription, DNA-templated	4.79191e-125
csn-miR165a-p5_2ss15AT19CT	CL6740.Contig2_All	GO:0009855	biological_process	determination of bilateral symmetry	4.79191e-125
csn-miR165a-p5_2ss15AT19CT	CL6740.Contig2_All	GO:0009944	biological_process	polarity specification of adaxial/abaxial axis	4.79191e-125
csn-miR165a-p5_2ss15AT19CT	CL6740.Contig2_All	GO:0009956	biological_process	radial pattern formation	4.79191e-125
csn-miR165a-p5_2ss15AT19CT	CL6740.Contig2_All	GO:0010014	biological_process	meristem initiation	4.79191e-125
csn-miR165a-p5_2ss15AT19CT	CL6740.Contig2_All	GO:0010051	biological_process	xylem and phloem pattern formation	4.79191e-125
csn-miR165a-p5_2ss15AT19CT	CL6740.Contig2_All	GO:0010089	biological_process	xylem development	4.79191e-125
csn-miR165a-p5_2ss15AT19CT	CL6740.Contig2_All	GO:0030154	biological_process	cell differentiation	4.79191e-125
csn-miR166a_R+2_2	CL6740.Contig2_All	GO:0006351	biological_process	transcription, DNA-templated	4.79191e-125
csn-miR166a_R+2_2	CL6740.Contig2_All	GO:0006355	biological_process	regulation of transcription, DNA-templated	4.79191e-125
csn-miR166a_R+2_2	CL6740.Contig2_All	GO:0009855	biological_process	determination of bilateral symmetry	4.79191e-125
csn-miR166a_R+2_2	CL6740.Contig2_All	GO:0009944	biological_process	polarity specification of adaxial/abaxial axis	4.79191e-125
csn-miR166a_R+2_2	CL6740.Contig2_All	GO:0009956	biological_process	radial pattern formation	4.79191e-125
csn-miR166a_R+2_2	CL6740.Contig2_All	GO:0010014	biological_process	meristem initiation	4.79191e-125
csn-miR166a_R+2_2	CL6740.Contig2_All	GO:0010051	biological_process	xylem and phloem pattern formation	4.79191e-125
csn-miR166a_R+2_2	CL6740.Contig2_All	GO:0010089	biological_process	xylem development	4.79191e-125
csn-miR166a_R+2_2	CL6740.Contig2_All	GO:0030154	biological_process	cell differentiation	4.79191e-125
PC-3p-16621_113	CL687.Contig2_All	GO:0008150	biological_process	biological_process	0
csn-miR6173-p5_3	CL5735.Contig3_All	GO:0006629	biological_process	lipid metabolic process	4.19821e-95
csn-miR6173-p5_3	CL5735.Contig3_All	GO:0007165	biological_process	signal transduction	4.19821e-95
csn-miR6173-p5_3	CL5735.Contig3_All	GO:0016042	biological_process	lipid catabolic process	4.19821e-95
csn-miR6173-p5_3	CL5735.Contig3_All	GO:0035556	biological_process	intracellular signal transduction	4.19821e-95
csn-miR166a_R+2_3	CL10714.Contig3_All	GO:0006351	biological_process	transcription, DNA-templated	1.35153e-116
csn-miR166a_R+2_3	CL10714.Contig3_All	GO:0006355	biological_process	regulation of transcription, DNA-templated	1.35153e-116
csn-miR166a_R+2_3	CL10714.Contig3_All	GO:0009855	biological_process	determination of bilateral symmetry	1.35153e-116
csn-miR166a_R+2_3	CL10714.Contig3_All	GO:0009887	biological_process	organ morphogenesis	1.35153e-116
csn-miR166a_R+2_3	CL10714.Contig3_All	GO:0009965	biological_process	leaf morphogenesis	1.35153e-116
csn-miR166a_R+2_3	CL10714.Contig3_All	GO:0010014	biological_process	meristem initiation	1.35153e-116
csn-miR166a_R+2_3	CL10714.Contig3_All	GO:0010073	biological_process	meristem maintenance	1.35153e-116
csn-miR166a_R+2_3	CL10714.Contig3_All	GO:0010075	biological_process	regulation of meristem growth	1.35153e-116
csn-miR166a_R+2_3	CL10714.Contig3_All	GO:0010087	biological_process	phloem or xylem histogenesis	1.35153e-116
csn-miR166a_R+2_3	CL10714.Contig3_All	GO:0030154	biological_process	cell differentiation	1.35153e-116
csn-miR166a_R+2_3	CL10714.Contig3_All	GO:0048263	biological_process	determination of dorsal identity	1.35153e-116
csn-miR166a_R+2_3	CL10714.Contig3_All	GO:0080060	biological_process	integument development	1.35153e-116
csn-miR396b_R+1_1	Unigene8003_All	GO:0006351	biological_process	transcription, DNA-templated	0
csn-miR396b_R+1_1	Unigene8003_All	GO:0006355	biological_process	regulation of transcription, DNA-templated	0
csn-miR396b_R+1_1	Unigene8003_All	GO:0009624	biological_process	response to nematode	0
csn-miR396b_R+1_1	Unigene8003_All	GO:0048364	biological_process	root development	0
csn-miR396b_R+1_1	Unigene8003_All	GO:0048366	biological_process	leaf development	0
csn-miR396b_R+1_1	Unigene8003_All	GO:0061062	biological_process	regulation of nematode larval development	0
csn-miR171n_R-1_1ss18CT	Unigene34350_CKL	GO:0010411	biological_process	xyloglucan metabolic process	1.04103e-110
csn-miR171n_R-1_1ss18CT	Unigene34350_CKL	GO:0042546	biological_process	cell wall biogenesis	1.04103e-110
csn-miR171n_R-1_1ss18CT	Unigene34350_CKL	GO:0071555	biological_process	cell wall organization	1.04103e-110
PC-3p-218723_6	Unigene9410_All	GO:0009809	biological_process	lignin biosynthetic process	4.89209e-141
csn-miR858b_R-3	Unigene33229_All	GO:0006351	biological_process	transcription, DNA-templated	4.63137e-82
csn-miR858b_R-3	Unigene33229_All	GO:0006355	biological_process	regulation of transcription, DNA-templated	4.63137e-82
csn-miR858b_R-3	Unigene33229_All	GO:0009651	biological_process	response to salt stress	4.63137e-82
csn-miR858b_R-3	Unigene33229_All	GO:0009723	biological_process	response to ethylene	4.63137e-82
csn-miR858b_R-3	Unigene33229_All	GO:0009733	biological_process	response to auxin	4.63137e-82
csn-miR858b_R-3	Unigene33229_All	GO:0009813	biological_process	flavonoid biosynthetic process	4.63137e-82
csn-miR858b_R-3	Unigene33229_All	GO:0045893	biological_process	positive regulation of transcription, DNA-templated	4.63137e-82
csn-miR858b_R-3	Unigene8417_All	GO:0006351	biological_process	transcription, DNA-templated	4.63137e-82
csn-miR858b_R-3	Unigene8417_All	GO:0006355	biological_process	regulation of transcription, DNA-templated	4.63137e-82
csn-miR858b_R-3	Unigene8417_All	GO:0009611	biological_process	response to wounding	4.63137e-82
csn-miR858b_R-3	Unigene8417_All	GO:0009651	biological_process	response to salt stress	4.63137e-82
csn-miR858b_R-3	Unigene8417_All	GO:0009737	biological_process	response to abscisic acid	4.63137e-82
csn-miR858b_R-3	Unigene8417_All	GO:0009751	biological_process	response to salicylic acid	4.63137e-82
csn-miR858b_R-3	Unigene8417_All	GO:0009800	biological_process	cinnamic acid biosynthetic process	4.63137e-82
csn-miR858b_R-3	Unigene8417_All	GO:0009892	biological_process	negative regulation of metabolic process	4.63137e-82
csn-miR858a_L-1R+1	Unigene33229_All	GO:0006351	biological_process	transcription, DNA-templated	4.63137e-82
csn-miR858a_L-1R+1	Unigene33229_All	GO:0006355	biological_process	regulation of transcription, DNA-templated	4.63137e-82
csn-miR858a_L-1R+1	Unigene33229_All	GO:0009651	biological_process	response to salt stress	4.63137e-82
csn-miR858a_L-1R+1	Unigene33229_All	GO:0009723	biological_process	response to ethylene	4.63137e-82
csn-miR858a_L-1R+1	Unigene33229_All	GO:0009733	biological_process	response to auxin	4.63137e-82
csn-miR858a_L-1R+1	Unigene33229_All	GO:0009813	biological_process	flavonoid biosynthetic process	4.63137e-82
csn-miR858a_L-1R+1	Unigene33229_All	GO:0045893	biological_process	positive regulation of transcription, DNA-templated	4.63137e-82
csn-miR858a_L-1R+1	Unigene8417_All	GO:0006351	biological_process	transcription, DNA-templated	4.63137e-82
csn-miR858a_L-1R+1	Unigene8417_All	GO:0006355	biological_process	regulation of transcription, DNA-templated	4.63137e-82
csn-miR858a_L-1R+1	Unigene8417_All	GO:0009611	biological_process	response to wounding	4.63137e-82
csn-miR858a_L-1R+1	Unigene8417_All	GO:0009651	biological_process	response to salt stress	4.63137e-82
csn-miR858a_L-1R+1	Unigene8417_All	GO:0009737	biological_process	response to abscisic acid	4.63137e-82
csn-miR858a_L-1R+1	Unigene8417_All	GO:0009751	biological_process	response to salicylic acid	4.63137e-82
csn-miR858a_L-1R+1	Unigene8417_All	GO:0009800	biological_process	cinnamic acid biosynthetic process	4.63137e-82
csn-miR858a_L-1R+1	Unigene8417_All	GO:0009892	biological_process	negative regulation of metabolic process	4.63137e-82
PC-3p-56893_33	CL10413.Contig1_All	GO:0008150	biological_process	biological_process	4.74015e-110
csn-miR166a_R+2_3	CL2309.Contig1_All	GO:0006351	biological_process	transcription, DNA-templated	1.83168e-93
csn-miR166a_R+2_3	CL2309.Contig1_All	GO:0006355	biological_process	regulation of transcription, DNA-templated	1.83168e-93
csn-miR166a_R+2_3	CL2309.Contig1_All	GO:0009855	biological_process	determination of bilateral symmetry	1.83168e-93
csn-miR166a_R+2_3	CL2309.Contig1_All	GO:0009887	biological_process	organ morphogenesis	1.83168e-93
csn-miR166a_R+2_3	CL2309.Contig1_All	GO:0009965	biological_process	leaf morphogenesis	1.83168e-93
csn-miR166a_R+2_3	CL2309.Contig1_All	GO:0010014	biological_process	meristem initiation	1.83168e-93
csn-miR166a_R+2_3	CL2309.Contig1_All	GO:0010073	biological_process	meristem maintenance	1.83168e-93
csn-miR166a_R+2_3	CL2309.Contig1_All	GO:0010075	biological_process	regulation of meristem growth	1.83168e-93
csn-miR166a_R+2_3	CL2309.Contig1_All	GO:0010087	biological_process	phloem or xylem histogenesis	1.83168e-93
csn-miR166a_R+2_3	CL2309.Contig1_All	GO:0030154	biological_process	cell differentiation	1.83168e-93
csn-miR166a_R+2_3	CL2309.Contig1_All	GO:0048263	biological_process	determination of dorsal identity	1.83168e-93
csn-miR166a_R+2_3	CL2309.Contig1_All	GO:0080060	biological_process	integument development	1.83168e-93
csn-miR166a_R+2_2	CL13354.Contig1_All	GO:0006351	biological_process	transcription, DNA-templated	1.83168e-93
csn-miR166a_R+2_2	CL13354.Contig1_All	GO:0006355	biological_process	regulation of transcription, DNA-templated	1.83168e-93
csn-miR166a_R+2_2	CL13354.Contig1_All	GO:0009855	biological_process	determination of bilateral symmetry	1.83168e-93
csn-miR166a_R+2_2	CL13354.Contig1_All	GO:0009887	biological_process	organ morphogenesis	1.83168e-93
csn-miR166a_R+2_2	CL13354.Contig1_All	GO:0009965	biological_process	leaf morphogenesis	1.83168e-93
csn-miR166a_R+2_2	CL13354.Contig1_All	GO:0010014	biological_process	meristem initiation	1.83168e-93
csn-miR166a_R+2_2	CL13354.Contig1_All	GO:0010073	biological_process	meristem maintenance	1.83168e-93
csn-miR166a_R+2_2	CL13354.Contig1_All	GO:0010075	biological_process	regulation of meristem growth	1.83168e-93
csn-miR166a_R+2_2	CL13354.Contig1_All	GO:0010087	biological_process	phloem or xylem histogenesis	1.83168e-93
csn-miR166a_R+2_2	CL13354.Contig1_All	GO:0030154	biological_process	cell differentiation	1.83168e-93
csn-miR166a_R+2_2	CL13354.Contig1_All	GO:0048263	biological_process	determination of dorsal identity	1.83168e-93
csn-miR166a_R+2_2	CL13354.Contig1_All	GO:0080060	biological_process	integument development	1.83168e-93
csn-miR166a_R+2_2	CL2309.Contig1_All	GO:0006351	biological_process	transcription, DNA-templated	1.83168e-93
csn-miR166a_R+2_2	CL2309.Contig1_All	GO:0006355	biological_process	regulation of transcription, DNA-templated	1.83168e-93
csn-miR166a_R+2_2	CL2309.Contig1_All	GO:0009855	biological_process	determination of bilateral symmetry	1.83168e-93
csn-miR166a_R+2_2	CL2309.Contig1_All	GO:0009887	biological_process	organ morphogenesis	1.83168e-93
csn-miR166a_R+2_2	CL2309.Contig1_All	GO:0009965	biological_process	leaf morphogenesis	1.83168e-93
csn-miR166a_R+2_2	CL2309.Contig1_All	GO:0010014	biological_process	meristem initiation	1.83168e-93
csn-miR166a_R+2_2	CL2309.Contig1_All	GO:0010073	biological_process	meristem maintenance	1.83168e-93
csn-miR166a_R+2_2	CL2309.Contig1_All	GO:0010075	biological_process	regulation of meristem growth	1.83168e-93
csn-miR166a_R+2_2	CL2309.Contig1_All	GO:0010087	biological_process	phloem or xylem histogenesis	1.83168e-93
csn-miR166a_R+2_2	CL2309.Contig1_All	GO:0030154	biological_process	cell differentiation	1.83168e-93
csn-miR166a_R+2_2	CL2309.Contig1_All	GO:0048263	biological_process	determination of dorsal identity	1.83168e-93
csn-miR166a_R+2_2	CL2309.Contig1_All	GO:0080060	biological_process	integument development	1.83168e-93
csn-miR166a-3p	CL2309.Contig1_All	GO:0006351	biological_process	transcription, DNA-templated	1.83168e-93
csn-miR166a-3p	CL2309.Contig1_All	GO:0006355	biological_process	regulation of transcription, DNA-templated	1.83168e-93
csn-miR166a-3p	CL2309.Contig1_All	GO:0009855	biological_process	determination of bilateral symmetry	1.83168e-93
csn-miR166a-3p	CL2309.Contig1_All	GO:0009887	biological_process	organ morphogenesis	1.83168e-93
csn-miR166a-3p	CL2309.Contig1_All	GO:0009965	biological_process	leaf morphogenesis	1.83168e-93
csn-miR166a-3p	CL2309.Contig1_All	GO:0010014	biological_process	meristem initiation	1.83168e-93
csn-miR166a-3p	CL2309.Contig1_All	GO:0010073	biological_process	meristem maintenance	1.83168e-93
csn-miR166a-3p	CL2309.Contig1_All	GO:0010075	biological_process	regulation of meristem growth	1.83168e-93
csn-miR166a-3p	CL2309.Contig1_All	GO:0010087	biological_process	phloem or xylem histogenesis	1.83168e-93
csn-miR166a-3p	CL2309.Contig1_All	GO:0030154	biological_process	cell differentiation	1.83168e-93
csn-miR166a-3p	CL2309.Contig1_All	GO:0048263	biological_process	determination of dorsal identity	1.83168e-93
csn-miR166a-3p	CL2309.Contig1_All	GO:0080060	biological_process	integument development	1.83168e-93
csn-miR165a-p5_2ss15AT19CT	CL13354.Contig1_All	GO:0006351	biological_process	transcription, DNA-templated	1.83168e-93
csn-miR165a-p5_2ss15AT19CT	CL13354.Contig1_All	GO:0006355	biological_process	regulation of transcription, DNA-templated	1.83168e-93
csn-miR165a-p5_2ss15AT19CT	CL13354.Contig1_All	GO:0009855	biological_process	determination of bilateral symmetry	1.83168e-93
csn-miR165a-p5_2ss15AT19CT	CL13354.Contig1_All	GO:0009887	biological_process	organ morphogenesis	1.83168e-93
csn-miR165a-p5_2ss15AT19CT	CL13354.Contig1_All	GO:0009965	biological_process	leaf morphogenesis	1.83168e-93
csn-miR165a-p5_2ss15AT19CT	CL13354.Contig1_All	GO:0010014	biological_process	meristem initiation	1.83168e-93
csn-miR165a-p5_2ss15AT19CT	CL13354.Contig1_All	GO:0010073	biological_process	meristem maintenance	1.83168e-93
csn-miR165a-p5_2ss15AT19CT	CL13354.Contig1_All	GO:0010075	biological_process	regulation of meristem growth	1.83168e-93
csn-miR165a-p5_2ss15AT19CT	CL13354.Contig1_All	GO:0010087	biological_process	phloem or xylem histogenesis	1.83168e-93
csn-miR165a-p5_2ss15AT19CT	CL13354.Contig1_All	GO:0030154	biological_process	cell differentiation	1.83168e-93
csn-miR165a-p5_2ss15AT19CT	CL13354.Contig1_All	GO:0048263	biological_process	determination of dorsal identity	1.83168e-93
csn-miR165a-p5_2ss15AT19CT	CL13354.Contig1_All	GO:0080060	biological_process	integument development	1.83168e-93
csn-miR166a_R+2_1ss1TG	CL2309.Contig1_All	GO:0006351	biological_process	transcription, DNA-templated	1.83168e-93
csn-miR166a_R+2_1ss1TG	CL2309.Contig1_All	GO:0006355	biological_process	regulation of transcription, DNA-templated	1.83168e-93
csn-miR166a_R+2_1ss1TG	CL2309.Contig1_All	GO:0009855	biological_process	determination of bilateral symmetry	1.83168e-93
csn-miR166a_R+2_1ss1TG	CL2309.Contig1_All	GO:0009887	biological_process	organ morphogenesis	1.83168e-93
csn-miR166a_R+2_1ss1TG	CL2309.Contig1_All	GO:0009965	biological_process	leaf morphogenesis	1.83168e-93
csn-miR166a_R+2_1ss1TG	CL2309.Contig1_All	GO:0010014	biological_process	meristem initiation	1.83168e-93
csn-miR166a_R+2_1ss1TG	CL2309.Contig1_All	GO:0010073	biological_process	meristem maintenance	1.83168e-93
csn-miR166a_R+2_1ss1TG	CL2309.Contig1_All	GO:0010075	biological_process	regulation of meristem growth	1.83168e-93
csn-miR166a_R+2_1ss1TG	CL2309.Contig1_All	GO:0010087	biological_process	phloem or xylem histogenesis	1.83168e-93
csn-miR166a_R+2_1ss1TG	CL2309.Contig1_All	GO:0030154	biological_process	cell differentiation	1.83168e-93
csn-miR166a_R+2_1ss1TG	CL2309.Contig1_All	GO:0048263	biological_process	determination of dorsal identity	1.83168e-93
csn-miR166a_R+2_1ss1TG	CL2309.Contig1_All	GO:0080060	biological_process	integument development	1.83168e-93
csn-miR166a_R+2_1	CL13354.Contig1_All	GO:0006351	biological_process	transcription, DNA-templated	1.83168e-93
csn-miR166a_R+2_1	CL13354.Contig1_All	GO:0006355	biological_process	regulation of transcription, DNA-templated	1.83168e-93
csn-miR166a_R+2_1	CL13354.Contig1_All	GO:0009855	biological_process	determination of bilateral symmetry	1.83168e-93
csn-miR166a_R+2_1	CL13354.Contig1_All	GO:0009887	biological_process	organ morphogenesis	1.83168e-93
csn-miR166a_R+2_1	CL13354.Contig1_All	GO:0009965	biological_process	leaf morphogenesis	1.83168e-93
csn-miR166a_R+2_1	CL13354.Contig1_All	GO:0010014	biological_process	meristem initiation	1.83168e-93
csn-miR166a_R+2_1	CL13354.Contig1_All	GO:0010073	biological_process	meristem maintenance	1.83168e-93
csn-miR166a_R+2_1	CL13354.Contig1_All	GO:0010075	biological_process	regulation of meristem growth	1.83168e-93
csn-miR166a_R+2_1	CL13354.Contig1_All	GO:0010087	biological_process	phloem or xylem histogenesis	1.83168e-93
csn-miR166a_R+2_1	CL13354.Contig1_All	GO:0030154	biological_process	cell differentiation	1.83168e-93
csn-miR166a_R+2_1	CL13354.Contig1_All	GO:0048263	biological_process	determination of dorsal identity	1.83168e-93
csn-miR166a_R+2_1	CL13354.Contig1_All	GO:0080060	biological_process	integument development	1.83168e-93
csn-miR166a_R+2_1ss1TG	CL13354.Contig1_All	GO:0006351	biological_process	transcription, DNA-templated	1.83168e-93
csn-miR166a_R+2_1ss1TG	CL13354.Contig1_All	GO:0006355	biological_process	regulation of transcription, DNA-templated	1.83168e-93
csn-miR166a_R+2_1ss1TG	CL13354.Contig1_All	GO:0009855	biological_process	determination of bilateral symmetry	1.83168e-93
csn-miR166a_R+2_1ss1TG	CL13354.Contig1_All	GO:0009887	biological_process	organ morphogenesis	1.83168e-93
csn-miR166a_R+2_1ss1TG	CL13354.Contig1_All	GO:0009965	biological_process	leaf morphogenesis	1.83168e-93
csn-miR166a_R+2_1ss1TG	CL13354.Contig1_All	GO:0010014	biological_process	meristem initiation	1.83168e-93
csn-miR166a_R+2_1ss1TG	CL13354.Contig1_All	GO:0010073	biological_process	meristem maintenance	1.83168e-93
csn-miR166a_R+2_1ss1TG	CL13354.Contig1_All	GO:0010075	biological_process	regulation of meristem growth	1.83168e-93
csn-miR166a_R+2_1ss1TG	CL13354.Contig1_All	GO:0010087	biological_process	phloem or xylem histogenesis	1.83168e-93
csn-miR166a_R+2_1ss1TG	CL13354.Contig1_All	GO:0030154	biological_process	cell differentiation	1.83168e-93
csn-miR166a_R+2_1ss1TG	CL13354.Contig1_All	GO:0048263	biological_process	determination of dorsal identity	1.83168e-93
csn-miR166a_R+2_1ss1TG	CL13354.Contig1_All	GO:0080060	biological_process	integument development	1.83168e-93
csn-miR166a-3p	CL13354.Contig1_All	GO:0006351	biological_process	transcription, DNA-templated	1.83168e-93
csn-miR166a-3p	CL13354.Contig1_All	GO:0006355	biological_process	regulation of transcription, DNA-templated	1.83168e-93
csn-miR166a-3p	CL13354.Contig1_All	GO:0009855	biological_process	determination of bilateral symmetry	1.83168e-93
csn-miR166a-3p	CL13354.Contig1_All	GO:0009887	biological_process	organ morphogenesis	1.83168e-93
csn-miR166a-3p	CL13354.Contig1_All	GO:0009965	biological_process	leaf morphogenesis	1.83168e-93
csn-miR166a-3p	CL13354.Contig1_All	GO:0010014	biological_process	meristem initiation	1.83168e-93
csn-miR166a-3p	CL13354.Contig1_All	GO:0010073	biological_process	meristem maintenance	1.83168e-93
csn-miR166a-3p	CL13354.Contig1_All	GO:0010075	biological_process	regulation of meristem growth	1.83168e-93
csn-miR166a-3p	CL13354.Contig1_All	GO:0010087	biological_process	phloem or xylem histogenesis	1.83168e-93
csn-miR166a-3p	CL13354.Contig1_All	GO:0030154	biological_process	cell differentiation	1.83168e-93
csn-miR166a-3p	CL13354.Contig1_All	GO:0048263	biological_process	determination of dorsal identity	1.83168e-93
csn-miR166a-3p	CL13354.Contig1_All	GO:0080060	biological_process	integument development	1.83168e-93
csn-miR165a-p5_2ss15AT19CT	CL2309.Contig1_All	GO:0006351	biological_process	transcription, DNA-templated	1.83168e-93
csn-miR165a-p5_2ss15AT19CT	CL2309.Contig1_All	GO:0006355	biological_process	regulation of transcription, DNA-templated	1.83168e-93
csn-miR165a-p5_2ss15AT19CT	CL2309.Contig1_All	GO:0009855	biological_process	determination of bilateral symmetry	1.83168e-93
csn-miR165a-p5_2ss15AT19CT	CL2309.Contig1_All	GO:0009887	biological_process	organ morphogenesis	1.83168e-93
csn-miR165a-p5_2ss15AT19CT	CL2309.Contig1_All	GO:0009965	biological_process	leaf morphogenesis	1.83168e-93
csn-miR165a-p5_2ss15AT19CT	CL2309.Contig1_All	GO:0010014	biological_process	meristem initiation	1.83168e-93
csn-miR165a-p5_2ss15AT19CT	CL2309.Contig1_All	GO:0010073	biological_process	meristem maintenance	1.83168e-93
csn-miR165a-p5_2ss15AT19CT	CL2309.Contig1_All	GO:0010075	biological_process	regulation of meristem growth	1.83168e-93
csn-miR165a-p5_2ss15AT19CT	CL2309.Contig1_All	GO:0010087	biological_process	phloem or xylem histogenesis	1.83168e-93
csn-miR165a-p5_2ss15AT19CT	CL2309.Contig1_All	GO:0030154	biological_process	cell differentiation	1.83168e-93
csn-miR165a-p5_2ss15AT19CT	CL2309.Contig1_All	GO:0048263	biological_process	determination of dorsal identity	1.83168e-93
csn-miR165a-p5_2ss15AT19CT	CL2309.Contig1_All	GO:0080060	biological_process	integument development	1.83168e-93
csn-miR166a_R+2_1	CL2309.Contig1_All	GO:0006351	biological_process	transcription, DNA-templated	1.83168e-93
csn-miR166a_R+2_1	CL2309.Contig1_All	GO:0006355	biological_process	regulation of transcription, DNA-templated	1.83168e-93
csn-miR166a_R+2_1	CL2309.Contig1_All	GO:0009855	biological_process	determination of bilateral symmetry	1.83168e-93
csn-miR166a_R+2_1	CL2309.Contig1_All	GO:0009887	biological_process	organ morphogenesis	1.83168e-93
csn-miR166a_R+2_1	CL2309.Contig1_All	GO:0009965	biological_process	leaf morphogenesis	1.83168e-93
csn-miR166a_R+2_1	CL2309.Contig1_All	GO:0010014	biological_process	meristem initiation	1.83168e-93
csn-miR166a_R+2_1	CL2309.Contig1_All	GO:0010073	biological_process	meristem maintenance	1.83168e-93
csn-miR166a_R+2_1	CL2309.Contig1_All	GO:0010075	biological_process	regulation of meristem growth	1.83168e-93
csn-miR166a_R+2_1	CL2309.Contig1_All	GO:0010087	biological_process	phloem or xylem histogenesis	1.83168e-93
csn-miR166a_R+2_1	CL2309.Contig1_All	GO:0030154	biological_process	cell differentiation	1.83168e-93
csn-miR166a_R+2_1	CL2309.Contig1_All	GO:0048263	biological_process	determination of dorsal identity	1.83168e-93
csn-miR166a_R+2_1	CL2309.Contig1_All	GO:0080060	biological_process	integument development	1.83168e-93
csn-miR166a_R+2_3	CL13354.Contig1_All	GO:0006351	biological_process	transcription, DNA-templated	1.83168e-93
csn-miR166a_R+2_3	CL13354.Contig1_All	GO:0006355	biological_process	regulation of transcription, DNA-templated	1.83168e-93
csn-miR166a_R+2_3	CL13354.Contig1_All	GO:0009855	biological_process	determination of bilateral symmetry	1.83168e-93
csn-miR166a_R+2_3	CL13354.Contig1_All	GO:0009887	biological_process	organ morphogenesis	1.83168e-93
csn-miR166a_R+2_3	CL13354.Contig1_All	GO:0009965	biological_process	leaf morphogenesis	1.83168e-93
csn-miR166a_R+2_3	CL13354.Contig1_All	GO:0010014	biological_process	meristem initiation	1.83168e-93
csn-miR166a_R+2_3	CL13354.Contig1_All	GO:0010073	biological_process	meristem maintenance	1.83168e-93
csn-miR166a_R+2_3	CL13354.Contig1_All	GO:0010075	biological_process	regulation of meristem growth	1.83168e-93
csn-miR166a_R+2_3	CL13354.Contig1_All	GO:0010087	biological_process	phloem or xylem histogenesis	1.83168e-93
csn-miR166a_R+2_3	CL13354.Contig1_All	GO:0030154	biological_process	cell differentiation	1.83168e-93
csn-miR166a_R+2_3	CL13354.Contig1_All	GO:0048263	biological_process	determination of dorsal identity	1.83168e-93
csn-miR166a_R+2_3	CL13354.Contig1_All	GO:0080060	biological_process	integument development	1.83168e-93
csn-miR156c-p3_1ss5AG	CL5115.Contig1_All	GO:0009826	biological_process	unidimensional cell growth	8.34695e-68
csn-miR156c-p3_1ss5AG	CL5115.Contig1_All	GO:0046777	biological_process	protein autophosphorylation	8.34695e-68
csn-miR172e-p3_1ss16CT	Unigene5176_All	GO:0006122	biological_process	mitochondrial electron transport, ubiquinol to cytochrome c	8.34695e-68
csn-miR172e-p3_1ss16CT	Unigene5176_All	GO:0006559	biological_process	L-phenylalanine catabolic process	8.34695e-68
csn-miR172e-p3_1ss16CT	Unigene5176_All	GO:0006572	biological_process	tyrosine catabolic process	8.34695e-68
csn-miR172e-p3_1ss16CT	Unigene5176_All	GO:0055114	biological_process	oxidation-reduction process	8.34695e-68
csn-miR172e-p3_1ss16CT	Unigene5176_All	GO:1902000	biological_process	homogentisate catabolic process	8.34695e-68
csn-miR172e-p5_1ss16CT	Unigene5176_All	GO:0006122	biological_process	mitochondrial electron transport, ubiquinol to cytochrome c	8.34695e-68
csn-miR172e-p5_1ss16CT	Unigene5176_All	GO:0006559	biological_process	L-phenylalanine catabolic process	8.34695e-68
csn-miR172e-p5_1ss16CT	Unigene5176_All	GO:0006572	biological_process	tyrosine catabolic process	8.34695e-68
csn-miR172e-p5_1ss16CT	Unigene5176_All	GO:0055114	biological_process	oxidation-reduction process	8.34695e-68
csn-miR172e-p5_1ss16CT	Unigene5176_All	GO:1902000	biological_process	homogentisate catabolic process	8.34695e-68
PC-3p-106909_15	CL6037.Contig2_All	GO:0008202	biological_process	steroid metabolic process	8.34695e-68
PC-3p-106909_15	CL6037.Contig2_All	GO:0009611	biological_process	response to wounding	8.34695e-68
PC-3p-106909_15	CL6037.Contig2_All	GO:0010051	biological_process	xylem and phloem pattern formation	8.34695e-68
PC-3p-106909_15	CL6037.Contig2_All	GO:0055114	biological_process	oxidation-reduction process	8.34695e-68
PC-3p-289649_4	Unigene18241_All	GO:0030490	biological_process	maturation of SSU-rRNA	2.46543e-76
PC-3p-111156_15	CL578.Contig3_All	GO:0008150	biological_process	biological_process	2.46543e-76
PC-3p-43833_43	CL2792.Contig3_All	GO:0009651	biological_process	response to salt stress	2.46543e-76
PC-3p-43833_43	CL2792.Contig3_All	GO:0016310	biological_process	phosphorylation	2.46543e-76
PC-3p-43833_43	CL2792.Contig3_All	GO:0046777	biological_process	protein autophosphorylation	2.46543e-76
PC-3p-43833_43	CL2792.Contig3_All	GO:0046854	biological_process	phosphatidylinositol phosphorylation	2.46543e-76
csn-miR5368-p3_2ss14TC17CT	Unigene19977_All	GO:0008150	biological_process	biological_process	2.46543e-76
csn-miR5368-p3_2ss14TC17CT	Unigene19977_All	GO:0009409	biological_process	response to cold	2.46543e-76
csn-miR5368-p3_2ss14TC17CT	Unigene19977_All	GO:0009414	biological_process	response to water deprivation	2.46543e-76
csn-miR5368-p3_2ss14TC17CT	Unigene19977_All	GO:0009651	biological_process	response to salt stress	2.46543e-76
csn-miR5368-p3_2ss14TC17CT	Unigene19977_All	GO:0009737	biological_process	response to abscisic acid	2.46543e-76
csn-miR5368-p3_2ss14TC17CT	Unigene19977_All	GO:0010154	biological_process	fruit development	2.46543e-76
csn-miR5368-p3_2ss14TC17CT	Unigene19977_All	GO:0010431	biological_process	seed maturation	2.46543e-76
csn-miR164b-p3_2ss6CG21CT	CL10890.Contig1_All	GO:0006457	biological_process	protein folding	2.46543e-76
csn-miR164b-p3_2ss6CG21CT	CL10890.Contig1_All	GO:0006915	biological_process	apoptotic process	2.46543e-76
csn-miR164b-p3_2ss6CG21CT	CL10890.Contig1_All	GO:0034605	biological_process	cellular response to heat	2.46543e-76
csn-miR164b-p3_2ss6CG21CT	CL10890.Contig1_All	GO:0034620	biological_process	cellular response to unfolded protein	2.46543e-76
csn-miR164b-p3_2ss6CG21CT	CL10890.Contig1_All	GO:0070417	biological_process	cellular response to cold	2.46543e-76
PC-3p-94023_18	Unigene9654_All	GO:0061077	biological_process	chaperone-mediated protein folding	2.46543e-76
csn-miR164a-p5_2ss15CG18CG	CL4656.Contig3_All	GO:0000160	biological_process	phosphorelay signal transduction system	2.46543e-76
csn-miR164a-p5_2ss15CG18CG	CL4656.Contig3_All	GO:0006351	biological_process	transcription, DNA-templated	2.46543e-76
csn-miR164a-p5_2ss15CG18CG	CL4656.Contig3_All	GO:0006355	biological_process	regulation of transcription, DNA-templated	2.46543e-76
csn-miR164a-p5_2ss15CG18CG	CL4656.Contig3_All	GO:0007623	biological_process	circadian rhythm	2.46543e-76
csn-miR164a-p5_2ss15CG18CG	CL4656.Contig3_All	GO:0009908	biological_process	flower development	2.46543e-76
csn-miR164a-p5_2ss15CG18CG	CL4656.Contig3_All	GO:0010031	biological_process	circumnutation	2.46543e-76
csn-miR164a-p5_2ss15CG18CG	CL4656.Contig3_All	GO:0010629	biological_process	negative regulation of gene expression	2.46543e-76
csn-miR477g-p5	CL2417.Contig1_All	GO:0006508	biological_process	proteolysis	2.46543e-76
csn-miR477g-p5	CL2417.Contig1_All	GO:0010205	biological_process	photoinhibition	2.46543e-76
csn-miR5267c-p3_2ss2AT17AG	Unigene41004_CKL	GO:0071423	biological_process	malate transmembrane transport	2.46543e-76
csn-miR535a_R-3	CL4782.Contig1_All	GO:0006468	biological_process	protein phosphorylation	2.46543e-76
csn-miR535a_R-3	CL4782.Contig1_All	GO:0007169	biological_process	transmembrane receptor protein tyrosine kinase signaling pathway	2.46543e-76
csn-miR396a_R-3_1ss4AC	Unigene23108_All	GO:0006364	biological_process	rRNA processing	2.46543e-76
csn-miR396a_R-3_1ss4AC	Unigene23108_All	GO:0045903	biological_process	positive regulation of translational fidelity	2.46543e-76
csn-miR164a-p3_2ss15CG18CG	CL4656.Contig3_All	GO:0000160	biological_process	phosphorelay signal transduction system	2.46543e-76
csn-miR164a-p3_2ss15CG18CG	CL4656.Contig3_All	GO:0006351	biological_process	transcription, DNA-templated	2.46543e-76
csn-miR164a-p3_2ss15CG18CG	CL4656.Contig3_All	GO:0006355	biological_process	regulation of transcription, DNA-templated	2.46543e-76
csn-miR164a-p3_2ss15CG18CG	CL4656.Contig3_All	GO:0007623	biological_process	circadian rhythm	2.46543e-76
csn-miR164a-p3_2ss15CG18CG	CL4656.Contig3_All	GO:0009908	biological_process	flower development	2.46543e-76
csn-miR164a-p3_2ss15CG18CG	CL4656.Contig3_All	GO:0010031	biological_process	circumnutation	2.46543e-76
csn-miR164a-p3_2ss15CG18CG	CL4656.Contig3_All	GO:0010629	biological_process	negative regulation of gene expression	2.46543e-76
csn-miR160a	CL13416.Contig6_All	GO:0006468	biological_process	protein phosphorylation	2.46543e-76
csn-miR160a	CL13416.Contig6_All	GO:0016310	biological_process	phosphorylation	2.46543e-76
csn-miR5368-p5_2ss15TC18CT	CL7357.Contig2_All	GO:0015995	biological_process	chlorophyll biosynthetic process	2.46543e-76
csn-miR5368-p5_2ss15TC18CT	CL7357.Contig2_All	GO:0055114	biological_process	oxidation-reduction process	2.46543e-76
PC-5p-32944_58	Unigene55474_All	GO:0008152	biological_process	metabolic process	2.46543e-76
PC-5p-32944_58	Unigene55474_All	GO:0016114	biological_process	terpenoid biosynthetic process	2.46543e-76
PC-5p-32944_58	Unigene55474_All	GO:0043693	biological_process	monoterpene biosynthetic process	2.46543e-76
PC-5p-38741_49	Unigene9181_All	GO:0006468	biological_process	protein phosphorylation	2.46543e-76
csn-miR164b-p5_2ss6CG21CT	Unigene23075_All	GO:0044550	biological_process	secondary metabolite biosynthetic process	2.46543e-76
PC-5p-1646_1004	Unigene20017_All	GO:0006168	biological_process	adenine salvage	2.46543e-76
PC-5p-1646_1004	Unigene20017_All	GO:0044209	biological_process	AMP salvage	2.46543e-76
PC-3p-75722_24	Unigene3356_All	GO:0006897	biological_process	endocytosis	2.46543e-76
PC-3p-75722_24	Unigene3356_All	GO:0016050	biological_process	vesicle organization	2.46543e-76
csn-miR164a-p3_2ss15CG18CG	Unigene4585_All	GO:0000395	biological_process	mRNA 5'-splice site recognition	2.46543e-76
PC-3p-100962_17	CL9837.Contig2_All	GO:0009695	biological_process	jasmonic acid biosynthetic process	2.46543e-76
PC-3p-100962_17	CL9837.Contig2_All	GO:0031408	biological_process	oxylipin biosynthetic process	2.46543e-76
PC-3p-12275_150	CL644.Contig2_All	GO:0008150	biological_process	biological_process	2.46543e-76
csn-miR167a-p3_2	Unigene27583_All	GO:0009738	biological_process	abscisic acid-activated signaling pathway	2.46543e-76
csn-miR167a-p3_2	Unigene27583_All	GO:0080163	biological_process	regulation of protein serine/threonine phosphatase activity	2.46543e-76
PC-3p-12275_150	CL8343.Contig2_All	GO:0000398	biological_process	mRNA splicing, via spliceosome	2.46543e-76
csn-miR482a-3p_2ss18TC21TA	Unigene26091_All	GO:0008150	biological_process	biological_process	2.46543e-76
csn-miR160c	CL13416.Contig6_All	GO:0006468	biological_process	protein phosphorylation	2.46543e-76
csn-miR160c	CL13416.Contig6_All	GO:0016310	biological_process	phosphorylation	2.46543e-76
csn-miR164a-p5_2ss15CG18CG	Unigene4585_All	GO:0000395	biological_process	mRNA 5'-splice site recognition	2.46543e-76
csn-miR858b_R-3	Unigene21580_All	GO:0006355	biological_process	regulation of transcription, DNA-templated	2.46543e-76
csn-miR858b_R-3	Unigene21580_All	GO:0009686	biological_process	gibberellin biosynthetic process	2.46543e-76
csn-miR858b_R-3	Unigene21580_All	GO:0009751	biological_process	response to salicylic acid	2.46543e-76
csn-miR858b_R-3	Unigene21580_All	GO:0016036	biological_process	cellular response to phosphate starvation	2.46543e-76
PC-3p-166627_9	CL147.Contig21_All	GO:0000045	biological_process	autophagosome assembly	2.46543e-76
csn-miR397-p3	CL1609.Contig10_All	GO:0006888	biological_process	ER to Golgi vesicle-mediated transport	2.46543e-76
csn-miR397-p3	CL1609.Contig10_All	GO:0009832	biological_process	plant-type cell wall biogenesis	2.46543e-76
csn-miR397-p3	CL1609.Contig10_All	GO:0009932	biological_process	cell tip growth	2.46543e-76
csn-miR397-p3	CL1609.Contig10_All	GO:0010053	biological_process	root epidermal cell differentiation	2.46543e-76
csn-miR397-p3	CL1609.Contig10_All	GO:0030036	biological_process	actin cytoskeleton organization	2.46543e-76
csn-miR156f	CL4678.Contig1_All	GO:0008150	biological_process	biological_process	2.46543e-76
csn-miR164b-p3_2ss6CG21CT	Unigene23075_All	GO:0044550	biological_process	secondary metabolite biosynthetic process	2.46543e-76
PC-3p-62093_30	CL323.Contig3_All	GO:0008150	biological_process	biological_process	2.46543e-76
PC-3p-62093_30	CL323.Contig3_All	GO:0009908	biological_process	flower development	2.46543e-76
PC-3p-62093_30	CL323.Contig3_All	GO:0030154	biological_process	cell differentiation	2.46543e-76
PC-3p-156016_9	CL2275.Contig2_All	GO:0008150	biological_process	biological_process	2.46543e-76
csn-miR156f	CL4678.Contig1_All	GO:0008150	biological_process	biological_process	2.46543e-76
PC-5p-81216_22	Unigene34261_CKL	GO:0006450	biological_process	regulation of translational fidelity	2.46543e-76
csn-miR529-5p	Unigene24524_All	GO:0006810	biological_process	transport	2.46543e-76
csn-miR529-5p	Unigene24524_All	GO:0015031	biological_process	protein transport	2.46543e-76
csn-miR5267j-p3_2ss2AT17AG	Unigene41004_CKL	GO:0071423	biological_process	malate transmembrane transport	2.46543e-76
csn-miR164b-p5_2ss6CG21CT	CL10890.Contig1_All	GO:0006457	biological_process	protein folding	2.46543e-76
csn-miR164b-p5_2ss6CG21CT	CL10890.Contig1_All	GO:0006915	biological_process	apoptotic process	2.46543e-76
csn-miR164b-p5_2ss6CG21CT	CL10890.Contig1_All	GO:0034605	biological_process	cellular response to heat	2.46543e-76
csn-miR164b-p5_2ss6CG21CT	CL10890.Contig1_All	GO:0034620	biological_process	cellular response to unfolded protein	2.46543e-76
csn-miR164b-p5_2ss6CG21CT	CL10890.Contig1_All	GO:0070417	biological_process	cellular response to cold	2.46543e-76
csn-miR397-p5	CL1609.Contig10_All	GO:0006888	biological_process	ER to Golgi vesicle-mediated transport	2.46543e-76
csn-miR397-p5	CL1609.Contig10_All	GO:0009832	biological_process	plant-type cell wall biogenesis	2.46543e-76
csn-miR397-p5	CL1609.Contig10_All	GO:0009932	biological_process	cell tip growth	2.46543e-76
csn-miR397-p5	CL1609.Contig10_All	GO:0010053	biological_process	root epidermal cell differentiation	2.46543e-76
csn-miR397-p5	CL1609.Contig10_All	GO:0030036	biological_process	actin cytoskeleton organization	2.46543e-76
csn-miR156d-p5	Unigene35969_All	GO:0006351	biological_process	transcription, DNA-templated	2.46543e-76
csn-miR156d-p5	Unigene35969_All	GO:0006355	biological_process	regulation of transcription, DNA-templated	2.46543e-76
csn-miR156d-p5	Unigene35969_All	GO:0048653	biological_process	anther development	2.46543e-76
csn-miR477a_L+1_1ss15GA	CL2815.Contig2_All	GO:0006950	biological_process	response to stress	2.46543e-76
csn-miR160c	CL13416.Contig6_All	GO:0006468	biological_process	protein phosphorylation	2.46543e-76
csn-miR160c	CL13416.Contig6_All	GO:0016310	biological_process	phosphorylation	2.46543e-76
csn-miR477a_L+1_1ss15GA	Unigene15538_All	GO:0006950	biological_process	response to stress	2.46543e-76
csn-miR397a_1ss2CA	CL7085.Contig1_EL	GO:0006446	biological_process	regulation of translational initiation	2.46543e-76
csn-miR397a_1ss2CA	CL7085.Contig1_EL	GO:0019509	biological_process	L-methionine biosynthetic process from methylthioadenosine	2.46543e-76
csn-miR2592bj-p3_2ss10TC17AT	CL2068.Contig3_All	GO:0006355	biological_process	regulation of transcription, DNA-templated	2.46543e-76
csn-miR2592bj-p3_2ss10TC17AT	CL2068.Contig3_All	GO:0006468	biological_process	protein phosphorylation	2.46543e-76
csn-miR2592bj-p3_2ss10TC17AT	CL2068.Contig3_All	GO:0006950	biological_process	response to stress	2.46543e-76
csn-miR2592bj-p3_2ss10TC17AT	CL2068.Contig3_All	GO:0009793	biological_process	embryo development ending in seed dormancy	2.46543e-76
csn-miR169c-p3_2ss12GC17TG	CL1779.Contig3_All	GO:0006352	biological_process	DNA-templated transcription, initiation	2.46543e-76
csn-miR169c-p3_2ss12GC17TG	CL1779.Contig3_All	GO:0016570	biological_process	histone modification	2.46543e-76
PC-3p-12275_150	CL644.Contig1_All	GO:0008150	biological_process	biological_process	2.46543e-76
csn-miR482a-3p_R-3_1ss9CG	CL5996.Contig1_All	GO:0006412	biological_process	translation	6.46046e-68
csn-miR482a-3p_R-3_1ss9CG	CL5996.Contig1_All	GO:0006413	biological_process	translational initiation	6.46046e-68
csn-miR166e-p5_2ss10GT17CT	CL2467.Contig2_All	GO:0008150	biological_process	biological_process	2.10081e-67
csn-miR166e-p5_2ss10GT17CT	CL2254.Contig2_All	GO:0008150	biological_process	biological_process	2.10081e-67
csn-miR166e-p5_2ss10GT17CT	CL2254.Contig4_All	GO:0008150	biological_process	biological_process	2.10081e-67
csn-miR6300_1ss1GT	CL7931.Contig2_All	GO:0007034	biological_process	vacuolar transport	1.8088e-66
csn-miR6300_1ss1GT	CL7931.Contig2_All	GO:0009555	biological_process	pollen development	1.8088e-66
csn-miR6300_1ss1GT	CL7931.Contig2_All	GO:0015031	biological_process	protein transport	1.8088e-66
csn-miR6300_1ss1GT	CL7931.Contig2_All	GO:0015992	biological_process	proton transport	1.8088e-66
csn-miR6300_1ss1GT	CL7931.Contig2_All	GO:0016192	biological_process	vesicle-mediated transport	1.8088e-66
csn-miR6300_1ss1GT	CL7931.Contig2_All	GO:0070676	biological_process	intralumenal vesicle formation	1.8088e-66
csn-miR821b-p5_2ss14TG20AT	CL8751.Contig1_All	GO:0008150	biological_process	biological_process	2.22347e-64
csn-miR156a-p3_1ss10TA	CL8557.Contig2_All	GO:0006094	biological_process	gluconeogenesis	2.22347e-64
csn-miR156a-p3_1ss10TA	CL8557.Contig2_All	GO:0006096	biological_process	glycolytic process	2.22347e-64
csn-miR156a-p3_1ss10TA	CL8557.Contig2_All	GO:0006979	biological_process	response to oxidative stress	2.22347e-64
csn-miR156a-p3_1ss10TA	CL8557.Contig2_All	GO:0042742	biological_process	defense response to bacterium	2.22347e-64
csn-miR156a-p3_1ss10TA	CL8557.Contig2_All	GO:0046686	biological_process	response to cadmium ion	2.22347e-64
csn-miR156a-p3_1ss10TA	CL8557.Contig2_All	GO:0055114	biological_process	oxidation-reduction process	2.22347e-64
PC-5p-14209_130	Unigene17108_All	GO:0009631	biological_process	cold acclimation	2.22347e-64
PC-5p-14209_130	Unigene17108_All	GO:0009737	biological_process	response to abscisic acid	2.22347e-64
PC-5p-14209_130	Unigene17108_All	GO:0042631	biological_process	cellular response to water deprivation	2.22347e-64
PC-5p-14209_130	Unigene17108_All	GO:0070417	biological_process	cellular response to cold	2.22347e-64
csn-miR2629g-p3_2ss13TC18GA	Unigene1155_All	GO:0009793	biological_process	embryo development ending in seed dormancy	2.22347e-64
csn-miR164a-p3_2ss15CG18CG	Unigene9184_All	GO:0006457	biological_process	protein folding	2.22347e-64
csn-miR164a-p3_2ss15CG18CG	Unigene9184_All	GO:0009658	biological_process	chloroplast organization	2.22347e-64
csn-miR164a-p3_2ss15CG18CG	Unigene9184_All	GO:0045037	biological_process	protein import into chloroplast stroma	2.22347e-64
csn-miR5175-p5_1ss4CT	CL7308.Contig3_All	GO:0009051	biological_process	pentose-phosphate shunt, oxidative branch	2.22347e-64
csn-miR5175-p5_1ss4CT	CL7308.Contig3_All	GO:0009744	biological_process	response to sucrose	2.22347e-64
csn-miR5175-p5_1ss4CT	CL7308.Contig3_All	GO:0009749	biological_process	response to glucose	2.22347e-64
csn-miR5175-p5_1ss4CT	CL7308.Contig3_All	GO:0009750	biological_process	response to fructose	2.22347e-64
csn-miR5175-p5_1ss4CT	CL7308.Contig3_All	GO:0019521	biological_process	D-gluconate metabolic process	2.22347e-64
csn-miR5175-p5_1ss4CT	CL7308.Contig3_All	GO:0046686	biological_process	response to cadmium ion	2.22347e-64
csn-miR5175-p5_1ss4CT	CL7308.Contig3_All	GO:0055114	biological_process	oxidation-reduction process	2.22347e-64
csn-miR164a-p5_2ss15CG18CG	Unigene9184_All	GO:0006457	biological_process	protein folding	2.22347e-64
csn-miR164a-p5_2ss15CG18CG	Unigene9184_All	GO:0009658	biological_process	chloroplast organization	2.22347e-64
csn-miR164a-p5_2ss15CG18CG	Unigene9184_All	GO:0045037	biological_process	protein import into chloroplast stroma	2.22347e-64
csn-miR172b-p3	Unigene27242_All	GO:0008150	biological_process	biological_process	3.23049e-116
csn-miR319b_R-1	CL13487.Contig4_All	GO:0006351	biological_process	transcription, DNA-templated	5.03982e-108
csn-miR319b_R-1	CL13487.Contig4_All	GO:0006355	biological_process	regulation of transcription, DNA-templated	5.03982e-108
csn-miR319b_R-1	CL13487.Contig4_All	GO:0009793	biological_process	embryo development ending in seed dormancy	5.03982e-108
csn-miR319b_R-1	CL13487.Contig4_All	GO:0009965	biological_process	leaf morphogenesis	5.03982e-108
csn-miR319b_R-1	CL13487.Contig4_All	GO:0030154	biological_process	cell differentiation	5.03982e-108
csn-miR319b_R-1	CL13487.Contig4_All	GO:0045962	biological_process	positive regulation of development, heterochronic	5.03982e-108
csn-miR319b_R-1	CL13487.Contig4_All	GO:0048366	biological_process	leaf development	5.03982e-108
csn-miR319a	CL13487.Contig4_All	GO:0006351	biological_process	transcription, DNA-templated	5.03982e-108
csn-miR319a	CL13487.Contig4_All	GO:0006355	biological_process	regulation of transcription, DNA-templated	5.03982e-108
csn-miR319a	CL13487.Contig4_All	GO:0009793	biological_process	embryo development ending in seed dormancy	5.03982e-108
csn-miR319a	CL13487.Contig4_All	GO:0009965	biological_process	leaf morphogenesis	5.03982e-108
csn-miR319a	CL13487.Contig4_All	GO:0030154	biological_process	cell differentiation	5.03982e-108
csn-miR319a	CL13487.Contig4_All	GO:0045962	biological_process	positive regulation of development, heterochronic	5.03982e-108
csn-miR319a	CL13487.Contig4_All	GO:0048366	biological_process	leaf development	5.03982e-108
csn-miR319a	CL13487.Contig2_All	GO:0006351	biological_process	transcription, DNA-templated	5.03982e-108
csn-miR319a	CL13487.Contig2_All	GO:0006355	biological_process	regulation of transcription, DNA-templated	5.03982e-108
csn-miR319a	CL13487.Contig2_All	GO:0009793	biological_process	embryo development ending in seed dormancy	5.03982e-108
csn-miR319a	CL13487.Contig2_All	GO:0009965	biological_process	leaf morphogenesis	5.03982e-108
csn-miR319a	CL13487.Contig2_All	GO:0030154	biological_process	cell differentiation	5.03982e-108
csn-miR319a	CL13487.Contig2_All	GO:0045962	biological_process	positive regulation of development, heterochronic	5.03982e-108
csn-miR319a	CL13487.Contig2_All	GO:0048366	biological_process	leaf development	5.03982e-108
csn-miR319a_R-1	CL13487.Contig2_All	GO:0006351	biological_process	transcription, DNA-templated	5.03982e-108
csn-miR319a_R-1	CL13487.Contig2_All	GO:0006355	biological_process	regulation of transcription, DNA-templated	5.03982e-108
csn-miR319a_R-1	CL13487.Contig2_All	GO:0009793	biological_process	embryo development ending in seed dormancy	5.03982e-108
csn-miR319a_R-1	CL13487.Contig2_All	GO:0009965	biological_process	leaf morphogenesis	5.03982e-108
csn-miR319a_R-1	CL13487.Contig2_All	GO:0030154	biological_process	cell differentiation	5.03982e-108
csn-miR319a_R-1	CL13487.Contig2_All	GO:0045962	biological_process	positive regulation of development, heterochronic	5.03982e-108
csn-miR319a_R-1	CL13487.Contig2_All	GO:0048366	biological_process	leaf development	5.03982e-108
csn-miR319b_R-1	CL13487.Contig2_All	GO:0006351	biological_process	transcription, DNA-templated	5.03982e-108
csn-miR319b_R-1	CL13487.Contig2_All	GO:0006355	biological_process	regulation of transcription, DNA-templated	5.03982e-108
csn-miR319b_R-1	CL13487.Contig2_All	GO:0009793	biological_process	embryo development ending in seed dormancy	5.03982e-108
csn-miR319b_R-1	CL13487.Contig2_All	GO:0009965	biological_process	leaf morphogenesis	5.03982e-108
csn-miR319b_R-1	CL13487.Contig2_All	GO:0030154	biological_process	cell differentiation	5.03982e-108
csn-miR319b_R-1	CL13487.Contig2_All	GO:0045962	biological_process	positive regulation of development, heterochronic	5.03982e-108
csn-miR319b_R-1	CL13487.Contig2_All	GO:0048366	biological_process	leaf development	5.03982e-108
csn-miR319a_R-1	CL13487.Contig4_All	GO:0006351	biological_process	transcription, DNA-templated	5.03982e-108
csn-miR319a_R-1	CL13487.Contig4_All	GO:0006355	biological_process	regulation of transcription, DNA-templated	5.03982e-108
csn-miR319a_R-1	CL13487.Contig4_All	GO:0009793	biological_process	embryo development ending in seed dormancy	5.03982e-108
csn-miR319a_R-1	CL13487.Contig4_All	GO:0009965	biological_process	leaf morphogenesis	5.03982e-108
csn-miR319a_R-1	CL13487.Contig4_All	GO:0030154	biological_process	cell differentiation	5.03982e-108
csn-miR319a_R-1	CL13487.Contig4_All	GO:0045962	biological_process	positive regulation of development, heterochronic	5.03982e-108
csn-miR319a_R-1	CL13487.Contig4_All	GO:0048366	biological_process	leaf development	5.03982e-108
PC-3p-177009_8	CL154.Contig6_All	GO:0000303	biological_process	response to superoxide	3.07918e-55
PC-3p-177009_8	CL154.Contig6_All	GO:0006809	biological_process	nitric oxide biosynthetic process	3.07918e-55
PC-3p-177009_8	CL154.Contig6_All	GO:0006970	biological_process	response to osmotic stress	3.07918e-55
PC-3p-177009_8	CL154.Contig6_All	GO:0006979	biological_process	response to oxidative stress	3.07918e-55
PC-3p-177009_8	CL154.Contig6_All	GO:0009414	biological_process	response to water deprivation	3.07918e-55
PC-3p-177009_8	CL154.Contig6_All	GO:0009651	biological_process	response to salt stress	3.07918e-55
PC-3p-177009_8	CL154.Contig6_All	GO:0009723	biological_process	response to ethylene	3.07918e-55
PC-3p-177009_8	CL154.Contig6_All	GO:0009793	biological_process	embryo development ending in seed dormancy	3.07918e-55
PC-3p-177009_8	CL154.Contig6_All	GO:0009816	biological_process	defense response to bacterium, incompatible interaction	3.07918e-55
PC-3p-177009_8	CL154.Contig6_All	GO:0009867	biological_process	jasmonic acid mediated signaling pathway	3.07918e-55
PC-3p-177009_8	CL154.Contig6_All	GO:0009873	biological_process	ethylene-activated signaling pathway	3.07918e-55
PC-3p-177009_8	CL154.Contig6_All	GO:0010102	biological_process	lateral root morphogenesis	3.07918e-55
PC-3p-177009_8	CL154.Contig6_All	GO:0010193	biological_process	response to ozone	3.07918e-55
PC-3p-177009_8	CL154.Contig6_All	GO:0012501	biological_process	programmed cell death	3.07918e-55
PC-3p-177009_8	CL154.Contig6_All	GO:0016032	biological_process	viral process	3.07918e-55
PC-3p-177009_8	CL154.Contig6_All	GO:0042542	biological_process	response to hydrogen peroxide	3.07918e-55
PC-3p-177009_8	CL154.Contig6_All	GO:2000377	biological_process	regulation of reactive oxygen species metabolic process	3.07918e-55
PC-3p-177009_8	CL154.Contig4_All	GO:0000303	biological_process	response to superoxide	3.07918e-55
PC-3p-177009_8	CL154.Contig4_All	GO:0006809	biological_process	nitric oxide biosynthetic process	3.07918e-55
PC-3p-177009_8	CL154.Contig4_All	GO:0006970	biological_process	response to osmotic stress	3.07918e-55
PC-3p-177009_8	CL154.Contig4_All	GO:0006979	biological_process	response to oxidative stress	3.07918e-55
PC-3p-177009_8	CL154.Contig4_All	GO:0009414	biological_process	response to water deprivation	3.07918e-55
PC-3p-177009_8	CL154.Contig4_All	GO:0009651	biological_process	response to salt stress	3.07918e-55
PC-3p-177009_8	CL154.Contig4_All	GO:0009723	biological_process	response to ethylene	3.07918e-55
PC-3p-177009_8	CL154.Contig4_All	GO:0009793	biological_process	embryo development ending in seed dormancy	3.07918e-55
PC-3p-177009_8	CL154.Contig4_All	GO:0009816	biological_process	defense response to bacterium, incompatible interaction	3.07918e-55
PC-3p-177009_8	CL154.Contig4_All	GO:0009867	biological_process	jasmonic acid mediated signaling pathway	3.07918e-55
PC-3p-177009_8	CL154.Contig4_All	GO:0009873	biological_process	ethylene-activated signaling pathway	3.07918e-55
PC-3p-177009_8	CL154.Contig4_All	GO:0010102	biological_process	lateral root morphogenesis	3.07918e-55
PC-3p-177009_8	CL154.Contig4_All	GO:0010193	biological_process	response to ozone	3.07918e-55
PC-3p-177009_8	CL154.Contig4_All	GO:0012501	biological_process	programmed cell death	3.07918e-55
PC-3p-177009_8	CL154.Contig4_All	GO:0016032	biological_process	viral process	3.07918e-55
PC-3p-177009_8	CL154.Contig4_All	GO:0042542	biological_process	response to hydrogen peroxide	3.07918e-55
PC-3p-177009_8	CL154.Contig4_All	GO:2000377	biological_process	regulation of reactive oxygen species metabolic process	3.07918e-55
PC-3p-177009_8	Unigene1948_All	GO:0006412	biological_process	translation	3.07918e-55
PC-3p-180347_8	Unigene23095_All	GO:0009225	biological_process	nucleotide-sugar metabolic process	3.57552e-71
PC-3p-180347_8	Unigene23095_All	GO:0033481	biological_process	galacturonate biosynthetic process	3.57552e-71
PC-3p-180347_8	Unigene23095_All	GO:0050829	biological_process	defense response to Gram-negative bacterium	3.57552e-71
PC-3p-180347_8	Unigene23095_All	GO:0050832	biological_process	defense response to fungus	3.57552e-71
csn-miR172c	Unigene41253_EL	GO:0006351	biological_process	transcription, DNA-templated	5.44725e-55
csn-miR172c	Unigene41253_EL	GO:0006355	biological_process	regulation of transcription, DNA-templated	5.44725e-55
csn-miR172c	Unigene41253_EL	GO:0009908	biological_process	flower development	5.44725e-55
csn-miR172c	Unigene41253_EL	GO:0010073	biological_process	meristem maintenance	5.44725e-55
csn-miR172c	Unigene41253_EL	GO:0010093	biological_process	specification of floral organ identity	5.44725e-55
csn-miR172c	Unigene41253_EL	GO:0019953	biological_process	sexual reproduction	5.44725e-55
csn-miR172c	Unigene41253_EL	GO:0030154	biological_process	cell differentiation	5.44725e-55
csn-miR172c	Unigene41253_EL	GO:0048316	biological_process	seed development	5.44725e-55
csn-miR172c	Unigene41253_EL	GO:0048481	biological_process	plant ovule development	5.44725e-55
csn-miR172d_L-2	Unigene41253_EL	GO:0006351	biological_process	transcription, DNA-templated	5.44725e-55
csn-miR172d_L-2	Unigene41253_EL	GO:0006355	biological_process	regulation of transcription, DNA-templated	5.44725e-55
csn-miR172d_L-2	Unigene41253_EL	GO:0009908	biological_process	flower development	5.44725e-55
csn-miR172d_L-2	Unigene41253_EL	GO:0010073	biological_process	meristem maintenance	5.44725e-55
csn-miR172d_L-2	Unigene41253_EL	GO:0010093	biological_process	specification of floral organ identity	5.44725e-55
csn-miR172d_L-2	Unigene41253_EL	GO:0019953	biological_process	sexual reproduction	5.44725e-55
csn-miR172d_L-2	Unigene41253_EL	GO:0030154	biological_process	cell differentiation	5.44725e-55
csn-miR172d_L-2	Unigene41253_EL	GO:0048316	biological_process	seed development	5.44725e-55
csn-miR172d_L-2	Unigene41253_EL	GO:0048481	biological_process	plant ovule development	5.44725e-55
csn-miR172k	Unigene41253_EL	GO:0006351	biological_process	transcription, DNA-templated	5.44725e-55
csn-miR172k	Unigene41253_EL	GO:0006355	biological_process	regulation of transcription, DNA-templated	5.44725e-55
csn-miR172k	Unigene41253_EL	GO:0009908	biological_process	flower development	5.44725e-55
csn-miR172k	Unigene41253_EL	GO:0010073	biological_process	meristem maintenance	5.44725e-55
csn-miR172k	Unigene41253_EL	GO:0010093	biological_process	specification of floral organ identity	5.44725e-55
csn-miR172k	Unigene41253_EL	GO:0019953	biological_process	sexual reproduction	5.44725e-55
csn-miR172k	Unigene41253_EL	GO:0030154	biological_process	cell differentiation	5.44725e-55
csn-miR172k	Unigene41253_EL	GO:0048316	biological_process	seed development	5.44725e-55
csn-miR172k	Unigene41253_EL	GO:0048481	biological_process	plant ovule development	5.44725e-55
csn-miR172d_L-2R+1	Unigene41253_EL	GO:0006351	biological_process	transcription, DNA-templated	5.44725e-55
csn-miR172d_L-2R+1	Unigene41253_EL	GO:0006355	biological_process	regulation of transcription, DNA-templated	5.44725e-55
csn-miR172d_L-2R+1	Unigene41253_EL	GO:0009908	biological_process	flower development	5.44725e-55
csn-miR172d_L-2R+1	Unigene41253_EL	GO:0010073	biological_process	meristem maintenance	5.44725e-55
csn-miR172d_L-2R+1	Unigene41253_EL	GO:0010093	biological_process	specification of floral organ identity	5.44725e-55
csn-miR172d_L-2R+1	Unigene41253_EL	GO:0019953	biological_process	sexual reproduction	5.44725e-55
csn-miR172d_L-2R+1	Unigene41253_EL	GO:0030154	biological_process	cell differentiation	5.44725e-55
csn-miR172d_L-2R+1	Unigene41253_EL	GO:0048316	biological_process	seed development	5.44725e-55
csn-miR172d_L-2R+1	Unigene41253_EL	GO:0048481	biological_process	plant ovule development	5.44725e-55
PC-3p-142896_11	CL12456.Contig1_All	GO:0055114	biological_process	oxidation-reduction process	7.89354e-100
csn-miR159a-p3_2ss9AT18TG	CL4707.Contig5_All	GO:0006629	biological_process	lipid metabolic process	1.29521e-55
csn-miR159a-p3_2ss9AT18TG	CL4707.Contig5_All	GO:0010187	biological_process	negative regulation of seed germination	1.29521e-55
csn-miR159a-p3_2ss9AT18TG	CL4707.Contig5_All	GO:0019915	biological_process	lipid storage	1.29521e-55
csn-miR159a-p3_2ss9AT18TG	CL4707.Contig5_All	GO:0046340	biological_process	diacylglycerol catabolic process	1.29521e-55
csn-miR159a-p3_2ss9AT18TG	CL4707.Contig5_All	GO:0052651	biological_process	monoacylglycerol catabolic process	1.29521e-55
csn-miR159a-p3_2ss9AT18TG	CL4707.Contig6_All	GO:0006629	biological_process	lipid metabolic process	1.29521e-55
csn-miR159a-p3_2ss9AT18TG	CL4707.Contig6_All	GO:0010187	biological_process	negative regulation of seed germination	1.29521e-55
csn-miR159a-p3_2ss9AT18TG	CL4707.Contig6_All	GO:0019915	biological_process	lipid storage	1.29521e-55
csn-miR159a-p3_2ss9AT18TG	CL4707.Contig6_All	GO:0046340	biological_process	diacylglycerol catabolic process	1.29521e-55
csn-miR159a-p3_2ss9AT18TG	CL4707.Contig6_All	GO:0052651	biological_process	monoacylglycerol catabolic process	1.29521e-55
csn-miR159a-p3_2ss9AT18TG	CL4707.Contig4_All	GO:0006629	biological_process	lipid metabolic process	1.29521e-55
csn-miR159a-p3_2ss9AT18TG	CL4707.Contig4_All	GO:0010187	biological_process	negative regulation of seed germination	1.29521e-55
csn-miR159a-p3_2ss9AT18TG	CL4707.Contig4_All	GO:0019915	biological_process	lipid storage	1.29521e-55
csn-miR159a-p3_2ss9AT18TG	CL4707.Contig4_All	GO:0046340	biological_process	diacylglycerol catabolic process	1.29521e-55
csn-miR159a-p3_2ss9AT18TG	CL4707.Contig4_All	GO:0052651	biological_process	monoacylglycerol catabolic process	1.29521e-55
PC-5p-154894_10	CL4608.Contig1_All	GO:0008150	biological_process	biological_process	1.44661e-57
csn-miR530a_R-1_1ss8GA	CL5358.Contig1_All	GO:0045944	biological_process	positive regulation of transcription from RNA polymerase II promoter	1.44661e-57
csn-miR530a_R-1_1ss8GA	CL5358.Contig4_All	GO:0045944	biological_process	positive regulation of transcription from RNA polymerase II promoter	1.44661e-57
csn-miR858b_R-3	CL3417.Contig1_All	GO:0006351	biological_process	transcription, DNA-templated	4.49978e-54
csn-miR858b_R-3	CL3417.Contig1_All	GO:0006355	biological_process	regulation of transcription, DNA-templated	4.49978e-54
csn-miR858b_R-3	CL3417.Contig1_All	GO:0009611	biological_process	response to wounding	4.49978e-54
csn-miR858b_R-3	CL3417.Contig1_All	GO:0009651	biological_process	response to salt stress	4.49978e-54
csn-miR858b_R-3	CL3417.Contig1_All	GO:0009737	biological_process	response to abscisic acid	4.49978e-54
csn-miR858b_R-3	CL3417.Contig1_All	GO:0009751	biological_process	response to salicylic acid	4.49978e-54
csn-miR858b_R-3	CL3417.Contig1_All	GO:0009800	biological_process	cinnamic acid biosynthetic process	4.49978e-54
csn-miR858b_R-3	CL3417.Contig1_All	GO:0009892	biological_process	negative regulation of metabolic process	4.49978e-54
csn-miR858a_L-1R+1	CL3417.Contig1_All	GO:0006351	biological_process	transcription, DNA-templated	4.49978e-54
csn-miR858a_L-1R+1	CL3417.Contig1_All	GO:0006355	biological_process	regulation of transcription, DNA-templated	4.49978e-54
csn-miR858a_L-1R+1	CL3417.Contig1_All	GO:0009611	biological_process	response to wounding	4.49978e-54
csn-miR858a_L-1R+1	CL3417.Contig1_All	GO:0009651	biological_process	response to salt stress	4.49978e-54
csn-miR858a_L-1R+1	CL3417.Contig1_All	GO:0009737	biological_process	response to abscisic acid	4.49978e-54
csn-miR858a_L-1R+1	CL3417.Contig1_All	GO:0009751	biological_process	response to salicylic acid	4.49978e-54
csn-miR858a_L-1R+1	CL3417.Contig1_All	GO:0009800	biological_process	cinnamic acid biosynthetic process	4.49978e-54
csn-miR858a_L-1R+1	CL3417.Contig1_All	GO:0009892	biological_process	negative regulation of metabolic process	4.49978e-54
csn-miR858a_L-1R+1	CL3417.Contig2_All	GO:0006351	biological_process	transcription, DNA-templated	4.49978e-54
csn-miR858a_L-1R+1	CL3417.Contig2_All	GO:0006355	biological_process	regulation of transcription, DNA-templated	4.49978e-54
csn-miR858a_L-1R+1	CL3417.Contig2_All	GO:0009611	biological_process	response to wounding	4.49978e-54
csn-miR858a_L-1R+1	CL3417.Contig2_All	GO:0009651	biological_process	response to salt stress	4.49978e-54
csn-miR858a_L-1R+1	CL3417.Contig2_All	GO:0009737	biological_process	response to abscisic acid	4.49978e-54
csn-miR858a_L-1R+1	CL3417.Contig2_All	GO:0009751	biological_process	response to salicylic acid	4.49978e-54
csn-miR858a_L-1R+1	CL3417.Contig2_All	GO:0009800	biological_process	cinnamic acid biosynthetic process	4.49978e-54
csn-miR858a_L-1R+1	CL3417.Contig2_All	GO:0009892	biological_process	negative regulation of metabolic process	4.49978e-54
csn-miR858b_R-3	CL3417.Contig2_All	GO:0006351	biological_process	transcription, DNA-templated	4.49978e-54
csn-miR858b_R-3	CL3417.Contig2_All	GO:0006355	biological_process	regulation of transcription, DNA-templated	4.49978e-54
csn-miR858b_R-3	CL3417.Contig2_All	GO:0009611	biological_process	response to wounding	4.49978e-54
csn-miR858b_R-3	CL3417.Contig2_All	GO:0009651	biological_process	response to salt stress	4.49978e-54
csn-miR858b_R-3	CL3417.Contig2_All	GO:0009737	biological_process	response to abscisic acid	4.49978e-54
csn-miR858b_R-3	CL3417.Contig2_All	GO:0009751	biological_process	response to salicylic acid	4.49978e-54
csn-miR858b_R-3	CL3417.Contig2_All	GO:0009800	biological_process	cinnamic acid biosynthetic process	4.49978e-54
csn-miR858b_R-3	CL3417.Contig2_All	GO:0009892	biological_process	negative regulation of metabolic process	4.49978e-54
csn-miR172k	CL8796.Contig2_All	GO:0006351	biological_process	transcription, DNA-templated	4.1033e-66
csn-miR172k	CL8796.Contig2_All	GO:0006355	biological_process	regulation of transcription, DNA-templated	4.1033e-66
csn-miR172k	CL8796.Contig2_All	GO:0009908	biological_process	flower development	4.1033e-66
csn-miR172k	CL8796.Contig2_All	GO:0010073	biological_process	meristem maintenance	4.1033e-66
csn-miR172k	CL8796.Contig2_All	GO:0010093	biological_process	specification of floral organ identity	4.1033e-66
csn-miR172k	CL8796.Contig2_All	GO:0019953	biological_process	sexual reproduction	4.1033e-66
csn-miR172k	CL8796.Contig2_All	GO:0030154	biological_process	cell differentiation	4.1033e-66
csn-miR172k	CL8796.Contig2_All	GO:0048316	biological_process	seed development	4.1033e-66
csn-miR172k	CL8796.Contig2_All	GO:0048481	biological_process	plant ovule development	4.1033e-66
csn-miR172c	CL8796.Contig2_All	GO:0006351	biological_process	transcription, DNA-templated	4.1033e-66
csn-miR172c	CL8796.Contig2_All	GO:0006355	biological_process	regulation of transcription, DNA-templated	4.1033e-66
csn-miR172c	CL8796.Contig2_All	GO:0009908	biological_process	flower development	4.1033e-66
csn-miR172c	CL8796.Contig2_All	GO:0010073	biological_process	meristem maintenance	4.1033e-66
csn-miR172c	CL8796.Contig2_All	GO:0010093	biological_process	specification of floral organ identity	4.1033e-66
csn-miR172c	CL8796.Contig2_All	GO:0019953	biological_process	sexual reproduction	4.1033e-66
csn-miR172c	CL8796.Contig2_All	GO:0030154	biological_process	cell differentiation	4.1033e-66
csn-miR172c	CL8796.Contig2_All	GO:0048316	biological_process	seed development	4.1033e-66
csn-miR172c	CL8796.Contig2_All	GO:0048481	biological_process	plant ovule development	4.1033e-66
csn-miR172d_L-2R+1	CL8796.Contig2_All	GO:0006351	biological_process	transcription, DNA-templated	4.1033e-66
csn-miR172d_L-2R+1	CL8796.Contig2_All	GO:0006355	biological_process	regulation of transcription, DNA-templated	4.1033e-66
csn-miR172d_L-2R+1	CL8796.Contig2_All	GO:0009908	biological_process	flower development	4.1033e-66
csn-miR172d_L-2R+1	CL8796.Contig2_All	GO:0010073	biological_process	meristem maintenance	4.1033e-66
csn-miR172d_L-2R+1	CL8796.Contig2_All	GO:0010093	biological_process	specification of floral organ identity	4.1033e-66
csn-miR172d_L-2R+1	CL8796.Contig2_All	GO:0019953	biological_process	sexual reproduction	4.1033e-66
csn-miR172d_L-2R+1	CL8796.Contig2_All	GO:0030154	biological_process	cell differentiation	4.1033e-66
csn-miR172d_L-2R+1	CL8796.Contig2_All	GO:0048316	biological_process	seed development	4.1033e-66
csn-miR172d_L-2R+1	CL8796.Contig2_All	GO:0048481	biological_process	plant ovule development	4.1033e-66
csn-miR172d_L-2	CL8796.Contig2_All	GO:0006351	biological_process	transcription, DNA-templated	4.1033e-66
csn-miR172d_L-2	CL8796.Contig2_All	GO:0006355	biological_process	regulation of transcription, DNA-templated	4.1033e-66
csn-miR172d_L-2	CL8796.Contig2_All	GO:0009908	biological_process	flower development	4.1033e-66
csn-miR172d_L-2	CL8796.Contig2_All	GO:0010073	biological_process	meristem maintenance	4.1033e-66
csn-miR172d_L-2	CL8796.Contig2_All	GO:0010093	biological_process	specification of floral organ identity	4.1033e-66
csn-miR172d_L-2	CL8796.Contig2_All	GO:0019953	biological_process	sexual reproduction	4.1033e-66
csn-miR172d_L-2	CL8796.Contig2_All	GO:0030154	biological_process	cell differentiation	4.1033e-66
csn-miR172d_L-2	CL8796.Contig2_All	GO:0048316	biological_process	seed development	4.1033e-66
csn-miR172d_L-2	CL8796.Contig2_All	GO:0048481	biological_process	plant ovule development	4.1033e-66
csn-miR396b-p3_2ss18AT19CT	CL4239.Contig3_All	GO:0007275	biological_process	multicellular organism development	2.10945e-49
csn-miR396b-p3_2ss18AT19CT	CL4239.Contig3_All	GO:0009691	biological_process	cytokinin biosynthetic process	2.10945e-49
csn-miR396b-p3_2ss18AT19CT	CL4239.Contig3_All	GO:0010268	biological_process	brassinosteroid homeostasis	2.10945e-49
csn-miR396b-p3_2ss18AT19CT	CL4239.Contig3_All	GO:0016125	biological_process	sterol metabolic process	2.10945e-49
csn-miR396b-p3_2ss18AT19CT	CL4239.Contig3_All	GO:0016132	biological_process	brassinosteroid biosynthetic process	2.10945e-49
csn-miR396b-p5_2ss18AT19CT	CL4239.Contig3_All	GO:0007275	biological_process	multicellular organism development	2.10945e-49
csn-miR396b-p5_2ss18AT19CT	CL4239.Contig3_All	GO:0009691	biological_process	cytokinin biosynthetic process	2.10945e-49
csn-miR396b-p5_2ss18AT19CT	CL4239.Contig3_All	GO:0010268	biological_process	brassinosteroid homeostasis	2.10945e-49
csn-miR396b-p5_2ss18AT19CT	CL4239.Contig3_All	GO:0016125	biological_process	sterol metabolic process	2.10945e-49
csn-miR396b-p5_2ss18AT19CT	CL4239.Contig3_All	GO:0016132	biological_process	brassinosteroid biosynthetic process	2.10945e-49
csn-miR171n_R-1_1ss18CT	CL4378.Contig1_All	GO:0008150	biological_process	biological_process	7.71805e-49
csn-miR172e-3p_L+1_1ss4AC	CL671.Contig5_All	GO:0006351	biological_process	transcription, DNA-templated	3.5599e-69
csn-miR172e-3p_L+1_1ss4AC	CL671.Contig5_All	GO:0006355	biological_process	regulation of transcription, DNA-templated	3.5599e-69
csn-miR172e-3p_L+1_1ss4AC	CL671.Contig5_All	GO:0009908	biological_process	flower development	3.5599e-69
csn-miR172e-3p_L+1_1ss4AC	CL671.Contig5_All	GO:0010073	biological_process	meristem maintenance	3.5599e-69
csn-miR172e-3p_L+1_1ss4AC	CL671.Contig5_All	GO:0010093	biological_process	specification of floral organ identity	3.5599e-69
csn-miR172e-3p_L+1_1ss4AC	CL671.Contig5_All	GO:0019953	biological_process	sexual reproduction	3.5599e-69
csn-miR172e-3p_L+1_1ss4AC	CL671.Contig5_All	GO:0030154	biological_process	cell differentiation	3.5599e-69
csn-miR172e-3p_L+1_1ss4AC	CL671.Contig5_All	GO:0048316	biological_process	seed development	3.5599e-69
csn-miR172e-3p_L+1_1ss4AC	CL671.Contig5_All	GO:0048481	biological_process	plant ovule development	3.5599e-69
csn-miR172c-3p_1ss4AC	CL671.Contig5_All	GO:0006351	biological_process	transcription, DNA-templated	3.5599e-69
csn-miR172c-3p_1ss4AC	CL671.Contig5_All	GO:0006355	biological_process	regulation of transcription, DNA-templated	3.5599e-69
csn-miR172c-3p_1ss4AC	CL671.Contig5_All	GO:0009908	biological_process	flower development	3.5599e-69
csn-miR172c-3p_1ss4AC	CL671.Contig5_All	GO:0010073	biological_process	meristem maintenance	3.5599e-69
csn-miR172c-3p_1ss4AC	CL671.Contig5_All	GO:0010093	biological_process	specification of floral organ identity	3.5599e-69
csn-miR172c-3p_1ss4AC	CL671.Contig5_All	GO:0019953	biological_process	sexual reproduction	3.5599e-69
csn-miR172c-3p_1ss4AC	CL671.Contig5_All	GO:0030154	biological_process	cell differentiation	3.5599e-69
csn-miR172c-3p_1ss4AC	CL671.Contig5_All	GO:0048316	biological_process	seed development	3.5599e-69
csn-miR172c-3p_1ss4AC	CL671.Contig5_All	GO:0048481	biological_process	plant ovule development	3.5599e-69
csn-miR172c	CL671.Contig5_All	GO:0006351	biological_process	transcription, DNA-templated	3.5599e-69
csn-miR172c	CL671.Contig5_All	GO:0006355	biological_process	regulation of transcription, DNA-templated	3.5599e-69
csn-miR172c	CL671.Contig5_All	GO:0009908	biological_process	flower development	3.5599e-69
csn-miR172c	CL671.Contig5_All	GO:0010073	biological_process	meristem maintenance	3.5599e-69
csn-miR172c	CL671.Contig5_All	GO:0010093	biological_process	specification of floral organ identity	3.5599e-69
csn-miR172c	CL671.Contig5_All	GO:0019953	biological_process	sexual reproduction	3.5599e-69
csn-miR172c	CL671.Contig5_All	GO:0030154	biological_process	cell differentiation	3.5599e-69
csn-miR172c	CL671.Contig5_All	GO:0048316	biological_process	seed development	3.5599e-69
csn-miR172c	CL671.Contig5_All	GO:0048481	biological_process	plant ovule development	3.5599e-69
csn-miR172d_L-2	CL671.Contig5_All	GO:0006351	biological_process	transcription, DNA-templated	3.5599e-69
csn-miR172d_L-2	CL671.Contig5_All	GO:0006355	biological_process	regulation of transcription, DNA-templated	3.5599e-69
csn-miR172d_L-2	CL671.Contig5_All	GO:0009908	biological_process	flower development	3.5599e-69
csn-miR172d_L-2	CL671.Contig5_All	GO:0010073	biological_process	meristem maintenance	3.5599e-69
csn-miR172d_L-2	CL671.Contig5_All	GO:0010093	biological_process	specification of floral organ identity	3.5599e-69
csn-miR172d_L-2	CL671.Contig5_All	GO:0019953	biological_process	sexual reproduction	3.5599e-69
csn-miR172d_L-2	CL671.Contig5_All	GO:0030154	biological_process	cell differentiation	3.5599e-69
csn-miR172d_L-2	CL671.Contig5_All	GO:0048316	biological_process	seed development	3.5599e-69
csn-miR172d_L-2	CL671.Contig5_All	GO:0048481	biological_process	plant ovule development	3.5599e-69
csn-miR172d_L-2R+1	CL671.Contig5_All	GO:0006351	biological_process	transcription, DNA-templated	3.5599e-69
csn-miR172d_L-2R+1	CL671.Contig5_All	GO:0006355	biological_process	regulation of transcription, DNA-templated	3.5599e-69
csn-miR172d_L-2R+1	CL671.Contig5_All	GO:0009908	biological_process	flower development	3.5599e-69
csn-miR172d_L-2R+1	CL671.Contig5_All	GO:0010073	biological_process	meristem maintenance	3.5599e-69
csn-miR172d_L-2R+1	CL671.Contig5_All	GO:0010093	biological_process	specification of floral organ identity	3.5599e-69
csn-miR172d_L-2R+1	CL671.Contig5_All	GO:0019953	biological_process	sexual reproduction	3.5599e-69
csn-miR172d_L-2R+1	CL671.Contig5_All	GO:0030154	biological_process	cell differentiation	3.5599e-69
csn-miR172d_L-2R+1	CL671.Contig5_All	GO:0048316	biological_process	seed development	3.5599e-69
csn-miR172d_L-2R+1	CL671.Contig5_All	GO:0048481	biological_process	plant ovule development	3.5599e-69
csn-miR172k	CL671.Contig5_All	GO:0006351	biological_process	transcription, DNA-templated	3.5599e-69
csn-miR172k	CL671.Contig5_All	GO:0006355	biological_process	regulation of transcription, DNA-templated	3.5599e-69
csn-miR172k	CL671.Contig5_All	GO:0009908	biological_process	flower development	3.5599e-69
csn-miR172k	CL671.Contig5_All	GO:0010073	biological_process	meristem maintenance	3.5599e-69
csn-miR172k	CL671.Contig5_All	GO:0010093	biological_process	specification of floral organ identity	3.5599e-69
csn-miR172k	CL671.Contig5_All	GO:0019953	biological_process	sexual reproduction	3.5599e-69
csn-miR172k	CL671.Contig5_All	GO:0030154	biological_process	cell differentiation	3.5599e-69
csn-miR172k	CL671.Contig5_All	GO:0048316	biological_process	seed development	3.5599e-69
csn-miR172k	CL671.Contig5_All	GO:0048481	biological_process	plant ovule development	3.5599e-69
csn-miR166e-p5_2ss10GT17CT	CL1883.Contig3_All	GO:0045490	biological_process	pectin catabolic process	3.36348e-83
PC-3p-213710_6	CL11399.Contig1_All	GO:0009809	biological_process	lignin biosynthetic process	3.36348e-83
csn-miR156a_R+1	Unigene35969_All	GO:0006351	biological_process	transcription, DNA-templated	1.4501e-57
csn-miR156a_R+1	Unigene35969_All	GO:0006355	biological_process	regulation of transcription, DNA-templated	1.4501e-57
csn-miR156a_R+1	Unigene35969_All	GO:0048653	biological_process	anther development	1.4501e-57
csn-miR156b-5p_R+1	Unigene35969_All	GO:0006351	biological_process	transcription, DNA-templated	1.4501e-57
csn-miR156b-5p_R+1	Unigene35969_All	GO:0006355	biological_process	regulation of transcription, DNA-templated	1.4501e-57
csn-miR156b-5p_R+1	Unigene35969_All	GO:0048653	biological_process	anther development	1.4501e-57
csn-miR858b_R-3	Unigene9120_All	GO:0006351	biological_process	transcription, DNA-templated	1.41635e-44
csn-miR858b_R-3	Unigene9120_All	GO:0006355	biological_process	regulation of transcription, DNA-templated	1.41635e-44
csn-miR858b_R-3	Unigene9120_All	GO:0009739	biological_process	response to gibberellin	1.41635e-44
csn-miR858b_R-3	Unigene9120_All	GO:0009751	biological_process	response to salicylic acid	1.41635e-44
csn-miR858b_R-3	Unigene9120_All	GO:0009753	biological_process	response to jasmonic acid	1.41635e-44
csn-miR858b_R-3	Unigene9121_All	GO:0006351	biological_process	transcription, DNA-templated	1.41635e-44
csn-miR858b_R-3	Unigene9121_All	GO:0006355	biological_process	regulation of transcription, DNA-templated	1.41635e-44
csn-miR858b_R-3	Unigene9121_All	GO:0009739	biological_process	response to gibberellin	1.41635e-44
csn-miR858b_R-3	Unigene9121_All	GO:0009751	biological_process	response to salicylic acid	1.41635e-44
csn-miR858b_R-3	Unigene9121_All	GO:0009753	biological_process	response to jasmonic acid	1.41635e-44
csn-miR858a_L-1R+1	CL13603.Contig6_All	GO:0006278	biological_process	RNA-dependent DNA biosynthetic process	4.1613e-44
[truncated: 16,922 more rows]
